# Supplementary material for: Fusion protein EWS-FLI1 is incorporated into a protein granule in cells
Source: bioRxiv preprint, doi:10.1101/2020.05.31.122028, version 4 (2021-05-05)
Supplement: Supplemental Table 2 [file 122028_file09.xlsx]

## Sheet: Expressed genes (10706)
			Fold Change in RNA-seq			Increased
						Decreased
			A673						Sankar et al., 2013 (1)		Riggi et al., 2014 (2)		HEK293T/17
		Gene	siEWSR1	p-adj	siEF	p-adj	siE-EF	p-adj	shEWSR1	shFLI1	shFLI1 A673	shFLI1 SKNMC	siEWSR1	p-adj	(+) EWS-FLI1	p-adj
		AAAS	0.829895	0.16563	0.711039	0.181	0.836125	0.0035	0.947263	0.467196	0.509622	0.459353	1.05438	0.413855	0.907262	0.0748371
		AACS	0.733567	0.611006	1.28788	0.0157	0.92447	0.036	0.916919	2.8599	1.85008	1.39351	1.13234	0.125255	1.18028	0.024727
		AADAT	1.74715	5.53e-09	1.25006	0.0006	2.31449	0.22	0.999868	1.92701	0.652432	7.77242	1.22983	0.0473759	0.826984	0.0742234
		AAGAB	1.31494	0.028426	0.786762	0.0192	1.27351	0.032	1.06157	1.05136	0.935054	1.20054	1.0785	0.172298	0.869234	0.0034711
		AAK1	1.06807	0.000897929	1.25266	0.692	1.44074	0.059	0.946241	1.77098	1.76858	1.32042	0.807129	0.00292566	0.77441	0.000228998
		AAMDC	1.03311	0.0361915	2.27048	0.931	1.59355	5.9e-05	1.10644	2.35731	0.747246	1.78061	0.740973	0.354371	0.935708	0.870202
		AAMP	0.85441	0.0644067	1.17365	0.302	1.26725	0.25	0.907863	1.08219	1.00008	0.795721	0.875663	0.000542504	0.890165	0.00242589
		AAR2	0.997231	2.71e-06	0.792235	0.988	0.601255	0.053	1.0277	0.924694	0.962959	1.0142	0.910542	0.223515	0.977749	0.8198
		AARS1	1.09733	5.6e-11	0.721965	0.49	0.54503	0.00091	0.945812	1.05192	0.657028	0.594671	1.05885	0.213467	0.957314	0.351389
		AARS2	0.644387	0.0342899	0.604997	0.00166	0.74817	9.9e-05	0.924448	0.858662	0.463941	0.566503	0.846364	0.00206026	0.936172	0.302806
		AASDH	1.55941	0.556475	1.26488	0.0811	1.18606	0.39	1.29505	0.787256	1.42469	0.766591	1.21078	0.0287373	1.18328	0.0551496
		AASDHPPT	0.787308	0.00911219	0.93045	0.0493	0.752903	0.61	1.02914	0.777922	0.337677	0.197094	0.963818	0.619784	0.903088	0.0715729
		AASS	1.04681	0.0273865	0.595841	0.837	0.727308	0.00014	1.02683	0.274537	0.445637	0.560169	1.04333	0.648316	0.753754	5.13601e-06
		AATF	0.828171	0.00500936	0.736624	0.234	0.695208	0.022	0.923615	1.15976	0.581611	0.456547	0.790919	2.14654e-06	1.35288	8.51524e-11
		AATK	1.14552	0.162871	1.50838	0.735	1.49765	0.16	1.04045	0.698906	0.976949	2.11553	0.967572	0.889679	1.69252	7.91741e-05
		ABAT	0.654289	0.00755478	1.10343	0.0667	1.67159	0.72	0.720989	0.261552	2.42464	1.40791	0.950782	0.851746	1.48685	0.016805
		ABCA1	1.68997	1.63e-23	3.62505	0.0246	6.12959	8.5e-12	0.974125	4.08747	36.9144	2.84338	1.09623	0.822821	2.16725	0.00133703
		ABCA2	0.626767	0.0112668	1.22944	0.0013	0.701488	0.18	0.867319	1.04418	1.16685	1.25153	1.07893	0.303552	1.10374	0.138906
		ABCA3	0.792784	0.00928055	1.85318	0.155	1.43186	1.8e-06	0.864275	3.64586	2.85684	1.69013	1.36018	2.56589e-10	1.40549	1.58251e-12
		ABCA5	1.19416	1.64e-13	0.435879	0.385	0.32618	7.6e-08	1.4597	0.777955	0.337916	0.79545	1.11498	0.31849	0.722882	0.000245785
		ABCA7	1.02172	0.0518197	1.43495	0.947	1.46278	0.069	1.15971	1.12237	3.09132	9.85938	1.04046	0.710846	1.41361	1.51702e-07
		ABCB10	1.1274	0.000255954	1.00696	0.441	0.655681	0.97	0.983901	1.42451	1.74888	2.50728	1.17076	0.000831431	0.832503	8.88073e-05
		ABCB7	0.770571	8.78e-05	0.73255	0.081	0.609723	0.021	1.06348	0.564401	0.875991	0.765182	0.976862	0.818342	0.837559	0.00666192
		ABCB8	0.626332	0.0439958	0.693035	0.00012	0.779781	0.0018	0.808408	0.878219	0.867487	0.884875	0.878676	0.018548	0.974291	0.730535
		ABCB9	0.711039	0.00762674	1.47223	0.0821	1.5493	0.022	1.01028	1.28856	1.22796	1.18793	1.14905	0.306239	1.16941	0.218902
		ABCC1	0.699308	1.04e-08	1.13682	0.0022	0.551913	0.32	1.03374	1.40477	1.64887	1.07233	1.04118	0.592075	0.921645	0.180521
		ABCC10	1.01748	0.230041	1.19251	0.939	1.19183	0.23	1.00565	1.54064	1.24732	0.9923	1.00568	0.965169	0.813853	0.00523774
		ABCC4	0.82188	9.39e-12	0.738157	0.122	0.503753	0.0053	1.02481	0.835046	0.193791	0.249844	1.13394	0.0968679	0.799974	0.00103939
		ABCC5	0.929805	0.401118	1.19997	0.696	1.13738	0.2	1.12915	0.929238	1.24279	0.856216	1.08743	0.1862	0.959661	0.568747
		ABCD1	0.894405	1.05e-13	2.05196	0.566	2.49254	1.3e-08	0.840534	2.04856	0.787297	1.48576	1.05919	0.779386	1.30771	0.0538277
		ABCD3	1.01185	2.66e-05	0.807761	0.945	0.660472	0.049	1.02422	0.826797	0.862398	0.661595	1.08451	0.149197	0.798401	1.52375e-06
		ABCD4	0.827597	0.369179	1.45297	0.19	1.13655	0.0013	0.952759	1.45165	1.29798	1.18244	0.868929	0.0218994	0.735954	2.07941e-08
		ABCE1	1.1042	9.37e-11	0.781328	0.466	0.541662	0.018	1.09861	0.913016	0.569536	0.514225	0.877978	0.448245	0.766769	0.0516195
		ABCF1	0.955283	0.00292618	0.49758	0.782	0.727983	2.3e-12	0.957753	0.782059	0.721866	0.96253	0.929439	0.0856643	0.844577	2.99722e-06
		ABCF2	0.963262	0.179604	0.667112	0.882	0.790732	0.012	0.994595	0.8436	0.752679	0.709639	0.760137	5.3158e-05	0.929406	0.394724
		ABCF3	0.734584	0.120987	0.948684	0.0379	0.799943	0.78	0.909118	1.29885	1.33715	1.01708	0.849392	0.0368454	0.991683	0.945241
		ABCG1	2.92817	0.00370113	2.48113	5.88e-05	2.15501	0.00046	1.10229	0.620636	3.86912	0.48799	2.0817	0.00284525	0.992136	0.986874
		ABHD10	0.643049	5.97e-06	0.663883	0.000644	0.585441	0.00081	1.10884	0.837277	1.0853	0.83787	0.851916	0.0110389	0.901936	0.124208
		ABHD11	0.552865	4.03e-05	0.631126	0.00454	0.460521	0.022	0.963362	1.45187	0.252688	0.877252	0.849094	0.213302	0.796442	0.0551678
		ABHD12	0.833353	0.669884	1.17365	0.186	1.06879	0.22	0.94731	1.27625	0.790596	0.947422	1.1146	0.128555	1.19822	0.00369977
		ABHD13	1.1088	0.000608177	0.87843	0.578	0.635495	0.43	1.42079	0.95907	1.21139	1.01724	0.971899	0.889712	0.851451	0.279451
		ABHD14B	0.583984	0.318316	0.859161	0.0539	0.75388	0.64	1.20899	0.859269	0.910532	0.560335	0.915086	0.500264	0.744766	0.0031674
		ABHD15	1.08749	0.0072366	1.56482	0.778	1.66104	0.022	1.06332	1.89929	0.496008	0.829612	1.30855	0.0491111	0.724056	0.018221
		ABHD17A	0.86814	0.756808	1.06511	0.429	0.941773	0.74	0.969932	1.34293	1.0242	1.13446	0.935045	0.226956	0.796791	2.1607e-07
		ABHD17B	1.26225	0.148413	1.13288	0.146	1.24008	0.46	0.996086	1.37869	1.13166	1.95079	1.00231	0.987204	0.80837	0.0116161
		ABHD17C	0.658383	0.601424	1.30949	0.263	0.816318	0.45	0.884417	0.955685	0.492374	0.293185	1.08913	0.501261	0.707897	0.00027055
		ABHD18	0.963262	0.037658	1.13288	0.891	0.69767	0.56	1.00124	0.839874	1.14159	1.1821	1.22098	0.0365055	0.70515	9.55897e-05
		ABHD2	0.783497	0.712543	0.845572	0.0766	1.06341	0.22	0.932763	0.871783	1.05222	1.36281	0.946353	0.443116	0.862506	0.0083687
		ABHD3	0.474671	1.54e-09	0.388773	2.27e-08	0.465514	1.1e-13	0.907446	0.353661	0.217704	0.238097	0.764595	0.00230922	0.698879	1.91785e-05
		ABHD4	0.68302	0.802384	1.32777	0.000145	0.964689	0.0033	0.742921	1.2015	1.66412	2.90159	0.896792	0.536963	1.40381	0.00764562
		ABHD5	1.06659	0.00121802	1.26839	0.781	1.59848	0.15	1.13025	2.16776	2.87137	1.50703	0.936659	0.601662	0.819707	0.0355924
		ABHD6	1.34817	6.4e-05	0.647073	0.032	0.617273	0.00038	1.02422	0.222252	0.613741	0.262266	1.15742	0.252195	0.81545	0.0832735
		ABHD8	1.05409	0.130024	0.971981	0.835	0.768227	0.91	0.857036	0.542442	1.00879	1.1995	1.07176	0.667897	1.24824	0.0596684
		ABI1	1.25788	0.000190153	1.07624	0.0381	1.42725	0.57	0.972842	1.16711	0.970626	0.625409	0.971768	0.779999	0.870071	0.0497147
		ABI2	1.24833	0.451185	0.7884	0.0916	0.898455	0.048	0.969876	0.562067	1.04916	1.38064	1.11346	0.0770309	0.73833	5.15408e-09
		ABITRAM	0.927231	0.887758	0.866337	0.682	1.02817	0.34	1.04211	0.652003	1.23874	0.852788	0.980379	0.892906	1.10761	0.345544
		ABL1	1.12584	0.972566	1.09581	0.382	0.993312	0.49	0.804106	1.20175	1.12892	2.11519	1.05962	0.364868	0.984025	0.837966
		ABL2	2.12874	6e-05	1.91454	9.82e-11	1.59926	1.2e-08	1.10122	2.03365	1.34933	2.04978	1.03573	0.655295	0.951894	0.478206
		ABLIM1	0.97468	5.86e-08	1.71356	0.894	0.544098	1.2e-06	1.10062	0.635221	0.630935	2.02631	1.12616	0.0301413	0.831771	0.000280493
		ABR	0.858565	0.0789273	1.45902	0.315	1.2517	0.0013	0.983047	2.68082	1.93693	1.51441	1.06405	0.350879	1.03341	0.65671
		ABRACL	1.13997	0.55988	0.868742	0.437	0.907527	0.36	1.03427	0.886387	0.768008	0.45354	0.94694	0.617554	0.780031	0.00124894
		ABRAXAS1	0.511923	0.0550257	0.471392	0.00215	0.664349	0.00022	1.01791	0.593812	0.268689	0.211274	0.965735	0.897007	1.08777	0.720322
		ABRAXAS2	1.13918	0.426579	0.95396	0.407	0.888918	0.79	1.04042	0.976962	0.934691	0.951327	0.930161	0.447726	1.09664	0.279451
		ABT1	0.850864	0.205516	0.866337	0.319	0.832877	0.35	0.930145	0.929621	1.08082	0.979164	0.886691	0.041489	0.91856	0.166052
		ABTB1	1.3113	5.25e-19	8.47375	0.375	5.87172	1.6e-27	1.12981	6.16588	2.45033	4.98347	0.714973	0.10271	0.733163	0.127021
		ABTB2	1.18674	0.151146	0.817335	0.201	1.19212	0.095	0.933507	0.680523	0.740015	0.229305	1.01715	0.912325	2.20305	2.22477e-23
		ACAA1	0.625898	0.481816	1.17854	0.00644	0.870056	0.38	0.828629	1.19424	1.2755	0.784091	0.847854	0.065146	0.996155	0.97866
		ACAA2	1.19665	0.000185067	0.938872	0.258	0.623689	0.73	0.824686	1.40973	0.790365	1.45381	1.0609	0.602999	1.06756	0.536231
		ACACA	0.588861	0.0214139	0.841479	6.89e-07	0.776	0.15	0.953478	0.934725	1.10682	1.12601	0.925018	0.0984919	1.04285	0.42117
		ACACB	0.694959	0.00028268	0.698339	0.197	0.43093	0.17	0.817789	0.392602	0.356367	0.216163	1.05448	0.71817	1.68678	3.62981e-09
		ACAD10	1.02314	0.0284505	0.761017	0.92	0.736028	0.058	1.02875	0.64155	1.07331	0.617485	1.17686	0.0955295	0.917688	0.446076
		ACAD8	0.952638	0.430245	1.23371	0.798	1.12393	0.11	0.973861	0.850664	1.06693	0.58819	1.19451	0.00926318	0.809669	0.00169547
		ACAD9	0.770037	0.000660511	0.847332	0.0514	0.673527	0.22	1.02133	1.04653	0.355904	0.639243	0.959896	0.615467	0.888336	0.0545187
		ACADM	0.860949	0.279278	0.964598	0.308	1.15622	0.84	1.04525	0.991233	0.748909	1.17694	1.05792	0.347229	0.874073	0.00529029
		ACADS	1.28788	0.920868	1.44693	0.373	1.03719	0.12	0.961535	2.13371	0.656823	1.69085	1.09945	0.574059	0.870609	0.35933
		ACADSB	0.690637	0.000500598	0.701736	0.0434	0.574363	0.037	0.952733	0.495195	1.5367	1.11013	0.873755	0.0828866	0.829066	0.00881096
		ACADVL	0.832199	0.0943831	0.940826	0.153	0.822581	0.68	0.918296	1.87505	1.3355	1.39043	1.10516	0.0421532	0.996467	0.96455
		ACAP2	1.00278	0.733876	0.935623	0.989	0.943196	0.69	1.21601	1.15955	1.37232	1.3314	0.875251	0.0823254	0.985305	0.894997
		ACAP3	0.890076	0.192154	1.05922	0.438	1.1798	0.72	1.01718	1.06408	1.11194	1.76664	1.10752	0.0705767	1.03479	0.628507
		ACAT1	1.04754	0.00232838	0.888227	0.749	0.748311	0.29	1.09638	0.951101	0.713353	0.60505	1.03634	0.633132	0.976656	0.761063
		ACAT2	0.439215	2.11e-06	0.573554	5.88e-14	0.597335	2.9e-07	1.18624	0.5134	0.790455	1.07641	0.906111	0.158195	0.96497	0.673606
		ACBD3	0.959264	0.787294	1.33607	0.812	1.04476	0.0097	0.907982	1.75004	2.16191	3.08662	0.857225	0.000853838	0.84664	0.000217526
		ACBD5	0.817335	0.226766	0.99654	0.151	0.85047	0.99	1.16968	1.25983	0.923731	0.949223	1.11203	0.251333	0.824083	0.016368
		ACBD6	0.986233	0.478974	0.882091	0.944	0.900645	0.38	0.994846	0.646989	0.612309	0.665104	0.992136	0.937381	0.841879	0.0029592
		ACBD7	1.71713	0.45875	0.938872	0.0173	1.21394	0.85	1.35082	0.558833	0.188381	0.753514	0.950567	0.766847	0.610071	5.66449e-06
		ACCS	1.01889	0.994107	1.39765	0.951	0.997494	0.08	1.35963	1.30645	0.768093	1.05776	1.43628	0.00808527	0.747001	0.049296
		ACD	0.781328	0.537491	0.795536	0.0958	0.903968	0.099	0.968976	1.21983	0.437903	0.635148	0.955582	0.719357	1.0019	0.990542
		ACER3	1.2201	0.0132936	1.18099	0.179	0.730835	0.24	1.05373	1.70755	0.653194	1.05301	1.0227	0.869867	0.829319	0.036971
		ACHE	1.47427	3.04e-09	1.49071	0.36	5.47677	0.3	0.925331	1.4341	1.2091	1.78716	1.83191	1.10221e-06	2.7794	1.00576e-18
		ACIN1	0.766841	0.00185234	0.747943	0.0124	0.74043	0.0028	0.840349	0.761344	0.903902	0.910922	0.729795	0.139199	1.15054	0.560371
		ACLY	0.472374	0.607332	0.85441	4.86e-11	0.922562	0.25	0.970334	1.00412	1.59389	1.0535	0.891395	1.02776e-05	0.910402	0.000350515
		ACO1	0.882091	0.00182344	0.859161	0.325	0.733594	0.18	0.973713	1.67134	0.97642	1.04577	0.986944	0.899051	0.788669	0.000109576
		ACO2	0.782954	0.00115114	0.683494	0.0418	0.71065	0.00026	0.954846	0.742899	1.06257	0.723459	0.954034	0.479975	1.16214	0.00216777
		ACOT1	0.707597	0.588961	1.2605	0.175	0.861806	0.35	0.802721	0.721705	0.734404	0.904217	1.02642	0.951006	0.646905	0.116688
		ACOT13	0.801625	0.304592	0.943438	0.145	1.16359	0.75	0.873655	0.885833	0.904167	0.613653	0.818303	0.0843246	1.02251	0.894997
		ACOT2	0.725979	0.00256004	0.99103	0.0387	0.661973	0.97	0.825947	0.864889	0.653686	0.981336	1.05138	0.685318	0.676893	2.39491e-06
		ACOT7	0.739181	0.00256687	0.722465	0.0651	0.649884	0.03	0.948598	1.04239	0.813806	0.582563	0.843855	0.00551294	1.31565	5.44308e-07
		ACOT8	1.02527	0.000973652	1.06881	0.929	1.66875	0.77	0.993547	1.10033	0.935934	0.862323	0.959989	0.813986	1.15784	0.241509
		ACOT9	1.39281	0.291878	1.51257	0.0167	1.16841	0.00085	1.0688	1.95932	1.4376	2.27353	0.924706	0.447348	0.755557	0.000301542
		ACOX1	0.762601	0.72957	0.939523	0.0263	1.0545	0.68	1.05158	1.50353	1.41688	1.59659	0.90167	0.234086	1.02683	0.810277
		ACOX3	0.669892	0.254924	1.55725	0.0149	0.823721	0.0022	0.987514	1.29157	1.08279	1.43345	1.0746	0.667685	1.2253	0.104986
		ACP1	1.2518	6.06e-06	0.815072	0.0636	0.631178	0.073	0.94337	0.722253	0.710643	0.66039	0.855485	0.000974453	0.947161	0.343612
		ACP2	0.91067	0.536025	1.05922	0.53	1.09011	0.7	0.94101	1.24454	1.00268	1.44467	1.00691	0.961766	0.878528	0.156639
		ACP6	1.44693	2.95e-13	1.29235	0.0223	2.62046	0.11	1.11164	0.879562	1.49154	0.831365	1.40308	2.15089e-07	0.822837	0.00740845
		ACSF2	0.735603	0.208553	4.54727	0.277	1.35466	8.8e-16	0.926814	2.14976	3.20519	7.10456	1.07244	0.67868	0.934978	0.68469
		ACSF3	1.03097	0.807119	1.15509	0.888	1.04872	0.36	0.938869	1.20793	0.785371	0.830482	1.0559	0.615034	0.99214	0.951483
		ACSL1	1.26313	0.0748854	1.87125	0.337	1.43045	0.00066	0.867641	2.42599	1.97959	0.931208	1.20443	0.0186222	0.81844	0.0108608
		ACSL3	0.807761	0.68562	0.91764	0.0586	1.05708	0.49	1.06315	1.25687	2.05982	1.60048	1.06946	0.223277	0.769487	1.84394e-09
		ACSL4	0.844986	0.91028	0.74072	0.183	1.01949	0.0046	1.34488	1.15105	1.54975	1.2356	0.937459	0.40049	0.715451	3.00292e-09
		ACSS1	1.01819	4.88e-05	1.8609	0.945	1.7888	1.4e-05	1.14218	1.0699	1.48597	2.55749	1.36119	9.76371e-05	0.780954	0.00354126
		ACSS2	0.565657	0.0312483	1.10343	7.23e-06	1.322	0.54	1.01109	1.50777	2.76516	4.35888	1.05783	0.680356	0.806408	0.0318657
		ACSS3	1.55401	0.0174855	1.27279	0.000929	1.36441	0.08	1.11569	1.12629	1.51747	0.452108	1.53824	0.127744	0.839419	0.622882
		ACTA2	0.605836	3.81e-08	3.59502	0.000298	1.93102	5.7e-29	0.656791	2.58681	3.30527	24.0773	1.40389	0.278336	2.405	0.000272177
		ACTB	0.998615	0.246141	1.36037	0.993	1.13757	0.0013	0.861814	1.94601	0.652317	1.83586	0.990917	0.855337	0.87221	1.29068e-06
		ACTG1	0.705638	0.0655462	0.962594	0.00215	0.81	0.81	1.04979	2.0496	0.552505	1.52796	0.779662	1.22748e-23	0.789675	1.70536e-21
		ACTL6A	0.59957	5.3e-06	0.590906	1.9e-07	0.650115	2e-08	0.959114	0.665127	0.46794	0.485069	0.768089	0.00103985	0.839544	0.0386292
		ACTN1	1.15669	0.184561	1.99723	0.295	1.17851	1.3e-11	0.957235	4.11394	1.36655	2.72411	0.932938	0.255322	0.802297	4.41762e-06
		ACTN2	1.19168	4.21e-16	0.485654	0.37	0.306557	1.1e-06	1.09632	0.0803371	0.227838	0.438126	1.33978	0.0331028	2.00722	1.83752e-09
		ACTN4	0.990343	0.018308	1.67365	0.967	1.35645	2e-05	0.886861	2.49277	0.928978	1.78057	0.945951	0.184545	0.947656	0.18003
		ACTR10	0.993092	0.662372	1.39959	0.971	0.939221	0.0012	0.996005	1.45931	1.40639	1.10096	0.929074	0.415753	1.11292	0.171436
		ACTR1A	0.976032	0.160834	0.842647	0.876	1.16269	0.11	0.969433	1.13963	0.79841	0.896271	0.920213	0.0735022	0.807755	6.54264e-08
		ACTR1B	0.984184	8.07e-05	1.2466	0.943	1.62824	0.12	0.943809	1.1628	0.83796	0.842921	1.23084	0.00128191	0.901783	0.16088
		ACTR2	1.00835	0.00113901	0.804966	0.959	0.751549	0.018	1.01769	1.41623	0.528536	0.691021	0.944755	0.0930996	0.77451	7.82983e-21
		ACTR3	0.827023	0.0800066	0.790589	0.0711	1.18832	0.012	0.966433	1.71401	0.659852	1.11712	0.886616	0.00352411	0.829864	1.25612e-06
		ACTR3B	1.0519	0.661147	0.78404	0.823	0.917801	0.13	0.791609	1.02262	0.620262	0.337489	1.2601	0.000597398	0.950496	0.585905
		ACTR5	0.890076	7.7e-05	0.750019	0.597	0.544652	0.092	0.997818	0.892485	0.705661	0.572208	1.01664	0.921613	0.898901	0.385232
		ACTR6	1.06807	0.636307	0.82245	0.738	0.919926	0.19	1.08237	0.730555	0.532818	0.383627	0.958203	0.693755	0.907	0.262404
		ACTR8	0.717972	0.424902	0.934327	0.0381	1.14647	0.73	0.954784	1.46905	0.607942	0.488983	0.933487	0.431259	0.873983	0.0619332
		ACTRT3	0.938221	0.0265971	1.05044	0.877	1.74871	0.9	0.982239	1.65199	0.457498	0.904217	1.14866	0.673938	0.812884	0.487663
		ACVR1	1.2008	4.99e-07	1.29325	0.21	1.75346	0.041	1.07994	1.71397	1.99566	3.68621	0.928435	0.692094	0.725491	0.0167607
		ACVR1B	0.966606	0.927002	0.924663	0.862	1.01883	0.63	0.992704	0.702359	0.329967	0.340826	1.01722	0.871352	0.9032	0.167143
		ACVR2A	1.17772	0.184561	0.888843	0.411	1.25125	0.56	1.11744	0.574497	1.10115	1.54758	1.03364	0.868747	0.824637	0.17229
		ACVR2B	0.598739	0.00536198	0.592546	0.0135	0.590027	0.0066	0.894114	0.311235	0.258335	0.1054	0.853324	0.000976343	0.923561	0.13596
		ACYP1	1.04608	0.671812	0.762072	0.874	0.90324	0.17	0.910575	0.544743	0.149194	0.212898	0.70327	0.0121546	0.890446	0.501735
		ACYP2	1.33978	0.0162451	1.45599	0.181	1.55722	0.05	1.2242	0.904078	1.44583	0.811389	1.27398	0.323922	1.07623	0.811619
		ADA	0.759962	0.000928814	1.37364	0.195	0.562178	0.087	0.890181	1.51721	1.0589	0.360121	0.909998	0.615822	1.0475	0.819192
		ADAL	0.934975	0.914487	0.637722	0.782	0.972847	0.0051	1.23679	0.642083	0.402598	0.681329	0.992959	0.973002	0.870641	0.318953
		ADAM10	1.47427	0.363317	1.69584	0.000355	1.1223	9.5e-08	1.04776	2.06444	0.690383	0.715665	1.34107	1.93463e-05	0.85348	0.0415258
		ADAM15	0.544876	0.20793	1.93589	9.61e-05	1.23821	3.4e-06	0.848806	2.65485	1.79868	1.08681	0.837099	0.000410201	0.983135	0.82827
		ADAM17	0.601652	4.82e-05	1.10114	8.74e-05	1.62128	0.55	1.08864	1.02849	0.485559	0.731829	0.544989	3.46659e-14	0.814481	0.0225346
		ADAM19	1.86865	0.000651719	5.75973	0.00408	1.96612	7.3e-23	1.03101	19.2835	4.69023	2.64145	1.51064	0.00290862	0.982392	0.94066
		ADAM22	1.15589	0.327543	0.725979	0.616	0.78896	0.16	1.0049	0.307657	0.352187	0.836961	1.30124	0.00250244	0.760231	0.00206211
		ADAM9	1.28165	0.000195119	1.39668	0.0423	1.47951	0.0019	1.23522	2.21536	3.16375	3.34005	1.0701	0.265276	0.874131	0.00864784
		ADAMTS1	1.03025	0.0713127	0.633317	0.911	1.35745	0.0057	0.799225	0.500668	2.8051	20.2554	1.00369	0.964835	0.659037	1.79024e-22
		ADAMTS10	0.736113	0.696043	1.98343	0.127	0.913453	1.1e-05	0.75914	0.870996	1.39641	1.16849	1.30298	0.297259	2.30353	1.17149e-05
		ADAMTS15	1.28788	1.96e-14	3.88792	0.282	3.59891	4.9e-16	1.15037	3.98555	2.97573	14.5497	1.11619	0.714952	0.659083	0.0661591
		ADAMTS3	1.79626	9.28e-16	2.8206	0.194	12.2435	0.0042	1.15546	4.54415	8.23496	1.03857	1.26877	0.0596271	0.860587	0.290302
		ADAMTS7	1.71	7.78e-28	8.43858	0.119	14.0325	6.6e-18	1.72564	22.1808	29.0511	1.40154	1.48407	0.00373183	1.18853	0.284819
		ADAMTS9	1.88818	3.35e-37	2.07197	0.0375	18.3473	0.008	1.39554	9.80794	38.189	20.797	0.941677	0.789998	0.796677	0.166321
		ADAMTSL4	0.859756	1.28e-08	1.32869	0.648	3.09938	0.27	0.839929	3.46535	2.27171	25.3181	0.983341	0.970475	1.72008	0.0330911
		ADAP1	1.55186	0.316592	2.00973	0.156	1.361	0.0078	1.02843	2.91664	1.56013	1.38458	1.21604	0.546098	1.27153	0.416274
		ADAR	0.945402	0.0498869	0.762072	0.695	0.817495	0.0057	0.843763	0.803985	0.984556	0.984892	1.05044	0.208806	0.831073	1.13606e-09
		ADARB1	1.64718	0.00297803	2.06194	1.4e-05	0.708394	7e-12	1.12582	1.97325	1.09817	0.635057	1.26871	0.000355505	0.798697	0.00110137
		ADAT1	0.877822	0.0940926	0.779705	0.435	0.796664	0.065	1.01371	0.890453	0.803014	1.05988	1.08558	0.385555	0.907905	0.27828
		ADAT2	0.84792	0.000929283	0.741747	0.542	0.523183	0.18	0.977968	0.692549	0.790572	0.433757	1.04275	0.67245	0.666245	4.02606e-10
		ADAT3	1.05995	0.000788479	0.555554	0.872	0.46881	0.012	0.739022	0.804217	0.609997	0.726862	0.839522	0.289918	1.21871	0.188324
		ADCK1	0.942131	0.000193583	0.702709	0.812	0.553184	0.038	1.07196	0.781856	0.775719	0.555389	1.17698	0.210736	1.04953	0.767572
		ADCK2	1.12272	0.937535	1.30315	0.655	1.02407	0.19	1.052	1.3068	0.700689	0.845022	1.02314	0.850851	1.18358	0.0287882
		ADCK5	0.872363	0.320548	1.6783	0.572	1.2201	0.002	0.999413	1.7103	0.558191	0.955713	1.05025	0.843772	1.17472	0.394659
		ADCY10P1	0.680185	0.785339	1.21251	0.265	0.897753	0.58	1.12511	0.549923	1.12615	0.66243	0.756443	0.164834	1.01265	0.966389
		ADCY3	0.732043	2.4e-06	0.74072	0.0491	0.531823	0.041	0.83809	1.1422	0.736351	1.77163	1.13889	0.0439459	1.00963	0.924911
		ADCY6	0.967276	5.89e-16	3.14705	0.896	3.01667	5.5e-17	0.874904	2.83175	2.06111	2.88921	0.986085	0.899051	0.80806	0.00135127
		ADCY7	0.474013	0.960824	0.705638	0.0031	0.980311	0.18	1.01932	1.50761	0.770844	0.990181	1.13548	0.712025	1.95081	0.00269344
		ADCY9	1.04536	5.26e-06	1.41618	0.824	0.578341	0.0052	0.906904	2.10859	1.79872	2.54363	1.05383	0.544721	1.05703	0.496599
		ADD1	0.875998	0.133108	1.02243	0.257	0.855825	0.88	0.977284	1.35725	1.0132	1.35832	0.945243	0.367573	1.24485	1.5798e-06
		ADD3	0.757858	0.00779422	1.03526	0.0129	0.760425	0.82	0.800756	0.687925	1.03273	2.29397	1.03311	0.722184	0.780244	3.41337e-05
		ADGRA2	0.869345	0.192322	1.07773	0.457	1.22975	0.7	0.873754	1.046	2.1513	2.38754	1.23812	0.0423463	1.21836	0.0588632
		ADGRA3	0.944747	0.487662	0.843816	0.72	0.910564	0.15	0.97049	0.992566	0.644206	0.640764	1.21636	0.0116409	0.924987	0.41256
		ADGRB1	0.591316	3.62e-07	1.06881	0.0428	0.316601	0.84	1.02345	0.117774	1.16119	1.06802	1.25383	0.479333	1.4435	0.173506
		ADGRB2	0.537747	0.0127079	2.55089	0.00139	1.54335	3.2e-09	0.859775	0.992956	1.32359	0.978819	0.872623	0.135699	1.1003	0.310215
		ADGRB3	0.863938	0.125582	0.447202	0.658	0.681616	0.00052	1.06016	0.172607	0.858654	0.767505	1.26356	0.260334	0.676504	0.0390506
		ADGRE5	1.00486	0.683697	1.09505	0.984	1.07955	0.61	0.899322	2.67759	3.6703	2.34672	0.786918	0.158868	1.33271	0.0584852
		ADGRG6	1.23628	0.00086148	15.0011	0.531	2.14829	6e-42	1.23423	12.3599	4.40723	7.4661	1.31047	0.231463	0.91043	0.740476
		ADGRL1	1.05848	1.44e-07	0.719966	0.74	0.564661	0.0045	0.916896	0.281617	0.790828	0.806182	1.30334	4.64125e-10	0.90703	0.0498658
		ADGRV1	1.40444	0.330092	0.594192	0.104	0.809865	0.0059	1.19433	0.346704	0.292111	0.393772	1.08099	0.52465	1.09054	0.446779
		ADH5	0.980099	0.000626398	0.900626	0.904	0.710878	0.4	1.06567	0.822449	0.642589	0.755724	0.944252	0.376277	0.869921	0.00690849
		ADI1	1.06733	0.397521	0.948684	0.682	1.11747	0.73	0.971656	0.908965	0.442549	0.427674	0.786805	4.37443e-06	1.04157	0.571893
		ADIPOR1	0.717972	7.31e-12	0.657016	0.00892	0.474965	0.00023	1.07454	1.06483	0.991804	0.966677	0.848899	0.000240407	0.968709	0.602198
		ADIPOR2	0.972655	0.54304	0.850864	0.86	0.925942	0.13	0.948601	0.875967	0.854871	1.21439	1.1313	0.00523077	1.13775	0.00261165
		ADK	1.11574	0.0540057	0.976032	0.477	1.26266	0.89	1.21607	1.76607	1.14757	1.10614	0.980672	0.862612	1.03948	0.690447
		ADM	2.5562	4.25e-17	14.0549	3.66e-09	3.48942	6.6e-76	0.986335	8.67183	3.74871	85.1709	1.33053	0.0695305	1.31018	0.0815907
		ADM2	1.80876	0.663637	2.34567	2.18e-05	0.919417	2.4e-11	1.00207	1.56363	2.22449	0.711997	1.0493	0.891879	1.32979	0.249651
		ADNP	0.801625	0.0029992	0.710546	0.0539	0.741547	0.00058	1.03375	0.694094	0.812682	1.09764	0.963048	0.517529	1.0802	0.097251
		ADNP2	0.909408	6.64e-06	0.622437	0.527	0.623476	7.5e-06	0.90525	0.793747	0.564644	0.955692	0.912776	0.180307	1.23499	0.000128338
		ADO	1.13524	0.59824	0.787308	0.346	0.92933	0.029	0.953544	0.959022	0.543874	0.555115	1.0451	0.650396	0.96386	0.70615
		ADORA1	1.58447	9.5e-07	22.5804	0.278	4.27981	4.8e-30	0.633171	8.30625	14.0496	#VALUE!	1.05579	0.896488	0.853008	0.660167
		ADORA2B	1.16716	0.00347021	1.91454	0.467	1.5773	1.4e-05	1.08395	4.06525	2.07018	1.84192	0.900175	0.480408	0.669956	0.00036126
		ADPGK	0.976709	0.0270187	1.29146	0.896	0.778424	0.022	1.04112	1.69173	1.42541	1.47939	1.02055	0.821615	0.74022	1.59802e-08
		ADPRHL1	1.46917	1.63e-05	1.33422	0.14	2.42333	0.26	1.00341	2.19045	1.99146	4.13474	0.816192	0.425525	1.69515	0.00532703
		ADPRM	0.816769	0.328667	1.12506	0.573	0.743144	0.74	1.09827	0.860005	1.04359	0.774301	0.770862	0.325772	1.03983	0.910393
		ADPRS	1.01255	0.750342	1.18674	0.958	1.06199	0.26	0.87696	1.18853	0.914996	0.714182	1.02269	0.859985	0.899051	0.244793
		ADRA2C	0.777546	1.84e-12	0.506628	0.279	0.285419	0.00022	0.940481	0.534945	0.289281	0.311288	0.988531	0.948203	1.16892	0.170007
		ADRM1	0.636397	0.406465	0.765779	0.00242	0.86704	0.077	0.81398	0.934207	0.704071	1.04829	0.70994	7.78662e-06	0.978686	0.862457
		ADSL	1.09354	0.871697	1.01537	0.709	0.960163	0.96	1.15927	1.6335	1.91701	1.6188	1.08911	0.432329	0.661418	4.2169e-07
		ADSS2	0.651574	0.00116566	0.898755	0.00049	0.685699	0.47	0.990408	1.52345	1.46691	0.659849	0.937487	0.253182	0.766303	1.21314e-09
		AEBP2	1.01045	0.00247637	0.836246	0.963	0.683481	0.21	1.20091	1.07323	0.799341	1.21297	1.05525	0.562529	0.934058	0.420051
		AEN	1.14235	0.014319	0.774856	0.51	0.688248	0.12	0.883948	0.870389	0.706807	0.63329	1.00763	0.923283	1.12993	0.00824898
		AFAP1	1.23114	0.0127404	0.895646	0.226	1.426	0.55	1.20606	2.90071	1.0359	2.54509	0.947984	0.878609	0.75746	0.278678
		AFDN	1.00556	5.19e-10	1.20414	0.976	1.79432	0.091	0.982899	1.43253	0.956932	0.744313	1.05934	0.210983	0.885192	0.0013962
		AFF1	1.06881	0.938913	1.33978	0.748	0.982358	0.039	0.994029	0.889934	1.20643	3.09733	0.957335	0.633641	0.79108	0.000190483
		AFF4	1.12039	0.624318	0.837406	0.437	1.07557	0.15	1.10185	0.976514	0.803742	1.15292	0.900756	0.0497344	1.12319	0.0200147
		AFG1L	0.779165	0.870493	0.906262	0.45	0.939769	0.78	1.02578	1.17132	1.54845	0.456567	1.03702	0.892918	1.1098	0.646323
		AFG3L1P	0.886382	0.00167989	0.693515	0.467	0.679156	0.0035	1.16033	0.960296	0.892967	1.25771	1.03068	0.737296	0.777474	1.45555e-05
		AFG3L2	0.844986	0.00816883	0.575146	0.208	0.744791	1.4e-07	0.983809	0.89577	1.00421	1.0588	1.09854	0.199597	0.89429	0.104003
		AFMID	0.758384	0.0173399	1.18017	0.0598	0.730492	0.26	0.866927	1.00431	0.762937	0.766858	0.856157	0.126748	1.373	0.000158097
		AFTPH	1.16635	0.172445	0.89131	0.293	0.836412	0.43	1.111	0.80564	1.07393	0.939281	1.11994	0.286395	1.00471	0.975787
		AGA	1.01677	0.211348	0.715984	0.946	0.815153	0.027	0.914422	1.04868	0.590897	0.510349	1.32104	0.0120091	1.05346	0.742988
		AGAP1	1.19416	0.64724	0.942131	0.237	0.926747	0.73	0.978081	1.02252	0.743031	0.529672	1.23141	0.000450647	1.05567	0.486694
		AGAP2	0.636839	0.0471209	1.46612	0.214	1.77653	0.23	0.691339	0.509798	1.07609	1.73462	0.964713	0.914113	1.2811	0.285836
		AGAP3	0.836246	0.275276	1.18509	0.204	1.15782	0.19	0.825855	1.32076	1.05626	0.737042	0.958997	0.370183	0.950453	0.233967
		AGAP4	1.09885	0.505523	0.99654	0.775	0.832494	0.99	1.57923	0.886885	1.25165	1.0483	1.02564	0.879054	0.996776	0.98655
		AGAP9	1.01255	0.0973468	1.08147	0.976	0.6592	0.82	1.29276	1.55406	2.09142	1.40043	0.930317	0.480508	0.637202	7.63551e-10
		AGBL5	1.14472	0.944438	0.923382	0.38	0.985954	0.62	0.902807	0.274152	0.627629	0.562951	1.16783	0.00164774	1.16379	0.00183932
		AGER	1.09429	0.424509	1.26576	0.765	1.21039	0.3	0.973105	0.640213	2.7421	1.44878	1.09651	0.751496	1.43186	0.0771816
		AGFG1	0.724471	0.614361	0.698339	0.00267	0.934415	0.00029	1.07113	0.809659	0.936847	1.44102	0.867921	0.00944706	0.860068	0.00452227
		AGFG2	0.852635	0.0101869	0.866337	0.417	0.675691	0.44	0.899053	1.27328	0.684843	1.29487	0.858808	0.310495	0.799127	0.0948365
		AGGF1	0.760489	0.746222	1.01115	0.105	0.936062	0.96	1.11061	0.70135	0.587061	0.476844	0.875236	0.327588	0.728691	0.00450511
		AGK	1.02669	0.0261568	0.789494	0.896	0.754027	0.073	0.926496	1.10585	0.556612	0.515269	1.0357	0.605964	0.752102	2.96785e-10
		AGL	0.647073	0.00152362	0.632002	0.00432	0.639924	0.0012	1.0265	0.650698	0.741472	0.570997	0.974653	0.756158	0.767438	2.56573e-07
		AGO1	0.687771	0.0012227	0.635957	0.00168	0.697869	3.4e-05	0.914992	0.746593	0.353315	0.43062	1.08567	0.157924	0.891516	0.0302715
		AGO2	0.759436	0.142328	0.566049	0.0054	0.861648	3.7e-11	0.793311	0.903377	0.443368	0.592879	0.915314	0.0547462	0.860298	0.000260586
		AGO3	1.09051	0.152659	1.04391	0.622	1.21319	0.81	1.30221	0.972493	1.4218	1.38095	1.03552	0.713325	0.794885	0.000284883
		AGO4	0.849096	0.0158972	1.75321	0.394	1.42554	5e-05	1.11822	0.750082	0.724015	0.751951	0.924185	0.505701	0.838635	0.0646638
		AGPAT1	1.14472	1.43e-07	0.671752	0.35	0.565947	0.0004	0.888126	0.741365	1.36531	1.19055	1.15196	0.139623	0.878629	0.17904
		AGPAT2	0.871758	0.956219	0.925946	0.446	1.01304	0.68	0.881888	1.05746	0.665571	1.20591	1.08247	0.421414	0.855027	0.0586617
		AGPAT3	0.902501	1.8e-11	0.849096	0.464	0.519545	0.16	1.19953	1.06812	1.23998	1.35239	1.25867	2.04932e-08	0.916627	0.0708729
		AGPAT4	0.957271	6.23e-08	1.06142	0.843	1.96583	0.76	1.01205	0.865062	1.18996	0.827826	1.07768	0.395144	0.889737	0.130972
		AGPAT5	1.24747	0.904899	0.757858	0.0641	0.979941	0.0095	1.60363	1.09481	0.800176	0.650927	1.13479	0.0494299	0.960258	0.62242
		AGPS	0.588861	0.0597878	0.943438	9.8e-07	0.806179	0.7	0.948516	1.54647	0.754899	1.64981	0.67665	8.56078e-20	0.874776	0.00520674
		AGRN	0.722465	1.27e-05	1.56917	0.00267	1.52957	3.4e-06	0.785826	1.35188	1.47778	1.31417	1.14473	0.0317135	1.08125	0.255404
		AGTPBP1	0.893785	0.000941593	0.661127	0.532	0.652365	0.0016	1.04166	0.935951	1.99269	1.064	1.07278	0.293075	0.884336	0.0338345
		AGTRAP	0.678302	0.737562	1.07549	0.0137	1.06904	0.71	0.786522	0.991221	0.780086	0.437784	1.0561	0.602064	0.840516	0.0267319
		AHCTF1	0.824162	1.9e-06	0.508035	0.12	0.61817	9.7e-12	1.0944	0.811007	0.896154	0.590276	0.957003	0.473122	1.05032	0.38649
		AHCY	0.585199	6.36e-06	0.45376	1.13e-08	0.661402	3e-19	0.988164	0.503205	0.575943	0.407412	0.77289	1.79492e-13	0.915423	0.0263327
		AHCYL1	1.05044	0.0557348	0.835088	0.724	0.82736	0.073	1.06968	0.98215	1.02283	1.03892	1.03245	0.580528	0.998158	0.980156
		AHCYL2	0.971307	0.712397	0.547906	0.889	1.06632	5.9e-07	1.15029	0.605273	0.912467	0.78459	1.07273	0.540198	0.852762	0.086422
		AHDC1	0.807761	4.86e-08	1.71951	0.12	1.79343	5.8e-07	0.876274	1.37202	1.97008	0.92876	0.90098	0.416001	0.703576	0.000347157
		AHI1	1.01819	4.4e-06	0.83047	0.934	0.567326	0.2	1.05197	1.00868	1.42838	1.34021	0.871433	0.12618	1.03933	0.734464
		AHNAK	1.06511	5.34e-20	1.96156	0.654	2.243	4.4e-14	1.08918	4.06768	1.75756	4.01272	0.989087	0.920938	1.56573	4.97533e-15
		AHNAK2	1.457	8.05e-47	7.53183	0.0371	7.42871	2.9e-47	1.01253	16.9724	10.4935	3.90241	1.27453	0.216413	1.87468	4.5957e-05
		AHR	1.20164	2.57e-09	1.99861	0.289	2.12446	6.8e-08	1.0005	2.90477	0.879577	1.51812	0.961357	0.867678	0.784233	0.132688
		AHSA1	0.653383	1.16e-07	0.677362	6.2e-05	0.594163	0.00012	0.926408	1.09822	0.49727	0.3534	0.901265	0.00948625	1.11166	0.00597046
		AHSA2P	0.912565	0.935702	0.96393	0.568	1.01575	0.83	1.15732	1.05197	0.31113	0.52484	1.21656	0.00965798	0.669932	1.08071e-08
		AIDA	1.02101	0.682902	0.849685	0.908	1.06165	0.17	1.00434	1.12822	0.465646	0.659867	1.11172	0.132887	0.91351	0.206
		AIF1L	1.26138	0.0373422	2.6081	0.366	1.53144	1.5e-07	0.694032	2.8058	0.267267	0.164056	1.09991	0.233034	0.644996	3.95695e-12
		AIFM1	0.869345	0.00039555	0.816203	0.324	0.677963	0.096	0.935238	0.680411	1.11929	0.542587	1.0942	0.0685871	0.8453	0.000114697
		AIFM2	0.661127	0.00626083	0.978063	0.0437	1.60908	0.94	0.817359	0.655387	1.10789	0.448107	0.935651	0.796011	1.2381	0.256088
		AIMP1	1.18509	0.24282	0.944747	0.181	0.867858	0.7	1.23233	1.0469	1.03988	1.01132	0.971548	0.721625	0.993001	0.939141
		AIMP2	0.864537	3.29e-05	0.709562	0.328	0.624779	0.0037	1.01536	1.29528	0.727821	0.767731	0.925278	0.424661	1.22064	0.00748603
		AIP	0.892547	0.00514905	0.896888	0.433	1.35844	0.42	0.862197	1.21938	0.719866	0.787664	0.901891	0.222126	0.800051	0.00160725
		AJM1	0.745355	0.00066946	1.42208	0.328	2.09047	0.16	0.944278	1.96475	4.90318	7.3172	1.11862	0.563064	2.5543	9.58541e-15
		AJUBA	1.48555	0.901684	1.99723	0.000134	1.02059	1e-13	0.988662	1.20009	0.979042	2.85902	1.16178	0.15789	1.19218	0.0752551
		AK1	0.814508	0.00532507	2.52275	0.555	1.94794	5.4e-05	1.23999	2.53873	2.89749	2.39201	0.856349	0.546812	1.25015	0.310028
		AK2	0.936272	0.458333	0.839731	0.65	0.910652	0.11	0.967301	0.99511	0.823168	0.599575	0.928429	0.0187837	0.995577	0.929454
		AK3	0.680657	0.0429524	0.696889	0.00169	0.78171	0.0017	1.26215	0.760307	0.531887	0.737042	0.795942	0.00234866	0.782309	0.000819626
		AK4	0.844401	0.00107431	2.0691	0.422	1.64618	6.8e-07	0.67007	2.75343	2.87266	1.21681	1.26312	8.87033e-06	0.888872	0.0458715
		AK6	1.23456	0.267612	0.782954	0.205	0.837523	0.11	1.02185	0.888589	0.712477	0.614525	0.844395	0.149553	0.82546	0.0842461
		AK9	0.973329	0.533236	1.93455	0.96	0.785109	0.027	1.2089	0.657942	2.11281	0.442624	0.976145	0.936571	1.5059	0.0201612
		AKAP1	0.772175	1.2e-07	0.796088	0.0625	0.543852	0.081	0.899578	0.758453	0.752678	0.418129	1.00048	0.99457	0.645271	1.19523e-31
		AKAP10	1.13997	0.00941225	0.855595	0.377	0.738239	0.24	1.10778	1.08022	1.53987	1.45164	1.0966	0.315549	0.875166	0.106641
		AKAP11	0.577943	0.439089	0.658383	4.41e-06	1.12019	0.00033	0.946738	0.921613	1.0162	0.703835	1.00119	0.992335	0.788234	0.000283943
		AKAP12	1.1235	9.48e-22	1.86995	0.468	2.8315	2.6e-08	0.896648	4.34384	0.780586	1.48556	0.868757	0.000786003	0.809946	9.95618e-08
		AKAP13	1.30677	1.16e-05	1.1274	0.0387	1.61758	0.39	1.15697	1.62079	1.0193	0.965509	1.08267	0.318519	1.03948	0.667954
		AKAP5	0.469436	0.282144	0.858565	0.00255	0.752081	0.61	0.726869	0.369417	0.225615	0.828483	0.761724	0.0792849	0.756406	0.0647756
		AKAP6	2.86394	0.500415	0.908148	2.8e-09	1.17513	0.72	1.17213	2.49278	3.31228	0.671941	1.26867	0.456182	0.987259	0.976601
		AKAP7	0.769504	2.55e-21	0.342221	0.0544	0.348738	1.1e-21	0.736999	0.0972668	0.241639	0.255554	1.27762	0.167162	0.987631	0.962961
		AKAP8	0.929805	0.196789	0.7884	0.666	0.845638	0.052	0.914742	0.859272	1.22398	1.40918	0.873024	0.0160287	1.50221	5.12442e-18
		AKAP8L	0.783497	0.0904169	0.927873	0.055	0.816211	0.61	0.961325	0.918334	0.946405	0.929764	0.813136	0.000116183	2.66084	5.00747e-107
		AKAP9	1.23971	0.11805	0.873573	0.0514	0.846548	0.23	1.26259	0.826346	1.13425	1.16687	1.08311	0.30477	0.916802	0.237394
		AKIP1	0.98214	0.0170617	1.31768	0.934	1.35397	0.034	0.960578	1.22215	0.832962	1.20124	0.948979	0.725427	1.07271	0.60029
		AKIRIN1	1.46917	0.676963	0.927231	0.000225	1.05995	0.57	0.8849	0.762671	0.331155	0.550159	1.09576	0.046107	0.861076	0.000326471
		AKIRIN2	1.18017	0.653976	0.808321	0.215	1.06931	0.074	0.985386	1.18789	0.651217	0.946975	0.82319	0.000100387	1.43882	6.7222e-16
		AKNA	1.9292	9.16e-08	1.1591	1.25e-08	0.537851	0.29	0.943697	0.441512	1.39793	0.43473	0.565961	8.35119e-05	0.522957	6.3157e-06
		AKR1A1	0.780245	0.0284505	1.25701	0.0803	0.755294	0.084	0.995171	0.981533	0.976643	0.750466	0.830269	0.00464453	0.873119	0.0467292
		AKR1B1	1.08298	0.963886	1.62001	0.688	1.01101	0.00022	0.814028	4.03139	1.57276	0.622121	0.850119	2.22721e-06	1.2013	2.62949e-08
		AKR7A2	0.93045	0.00300743	1.20664	0.662	1.38932	0.13	0.986715	1.10891	0.70459	0.64004	0.976787	0.813463	0.99663	0.975509
		AKT1	0.846159	0.477907	1.08824	0.248	1.11031	0.58	0.875457	1.79927	1.00597	1.17917	1.09769	0.101181	0.952178	0.447796
		AKT1S1	0.980099	0.00330666	1.1479	0.904	1.34731	0.24	0.925094	1.18368	1.70535	1.3148	0.983454	0.82682	1.23275	1.783e-06
		AKT2	0.860949	0.0301588	0.691116	0.368	0.748001	0.0043	0.902195	1.05149	0.602761	0.771274	1.05513	0.318173	0.930294	0.133335
		AKT3	1.22519	0.766505	0.880869	0.563	1.11368	0.73	1.20739	0.469422	1.7522	1.22715	1.10541	0.0593448	0.734725	2.01445e-11
		AKTIP	0.613868	0.560296	1.23628	0.00826	1.13388	0.27	0.971705	1.20052	0.990794	1.23016	0.896429	0.462635	0.788097	0.0495007
		ALAD	0.862741	0.461683	0.813379	0.482	1.15262	0.25	0.904558	0.994073	0.804817	0.907268	0.95195	0.705675	0.973763	0.846568
		ALAS1	0.867539	0.0101225	0.808321	0.375	0.723242	0.12	1.08087	1.19211	0.9664	0.755509	0.991586	0.928505	1.31893	2.76438e-08
		ALCAM	1.2008	8.37e-16	2.13022	0.119	2.07777	9.7e-17	0.959752	2.6086	0.948769	0.912791	1.0021	0.984766	0.682484	4.3208e-11
		ALDH16A1	0.751581	0.943864	0.895646	0.0965	1.0176	0.57	0.894594	0.757908	0.737631	0.513739	0.958161	0.71275	0.926345	0.439504
		ALDH18A1	0.723467	0.000984627	0.715488	0.00267	0.719141	0.00085	0.911358	1.37447	1.88921	1.47028	1.0192	0.750608	1.07521	0.0855713
		ALDH1B1	0.619854	6.9e-09	0.852635	8.8e-05	0.523009	0.24	0.812154	1.44451	1.19151	2.66468	1.02295	0.789943	0.715122	4.79777e-11
		ALDH1L2	0.903753	0.00147035	2.08638	0.622	0.632791	3.3e-08	0.961861	3.41422	3.61197	0.420502	1.27754	2.11252e-06	0.696128	2.82035e-12
		ALDH2	1.01185	1.65e-11	1.47734	0.957	2.14	0.0014	0.836968	0.567527	1.25189	1.12929	1.19831	0.0175464	0.989305	0.930964
		ALDH3A2	0.802737	0.105531	0.937571	0.0804	1.20971	0.66	0.975152	1.10045	0.639798	0.602811	1.17376	0.00226314	0.808892	3.41123e-05
		ALDH4A1	0.770571	2.26e-10	1.05044	0.133	0.415111	0.82	0.897785	0.553517	0.562794	0.291581	1.20161	0.0628708	1.04538	0.738592
		ALDH5A1	0.83047	0.000115923	1.69584	0.435	0.501666	0.0023	1.15643	0.492984	0.779854	0.775676	1.21338	0.00204707	0.793016	0.000192579
		ALDH6A1	1.18509	0.499436	1.41421	0.456	1.15791	0.055	1.0668	0.506629	0.959886	0.801146	1.08033	0.459753	0.799114	0.00629484
		ALDH7A1	0.933033	0.184055	0.980779	0.65	0.854226	0.91	0.842475	0.579113	0.413012	0.438959	1.09219	0.0807863	1.07451	0.161117
		ALDH9A1	0.787308	0.944975	0.812252	0.0364	0.988181	0.053	0.993263	0.73655	1.05415	1.11433	1.05001	0.447726	0.807609	6.42553e-06
		ALDOC	0.673617	5.58e-26	1.30495	0.0169	3.7851	0.089	1.01916	0.409253	2.75518	3.00036	0.731001	0.201334	1.57642	0.026341
		ALG1	0.985549	2.47e-05	0.983502	0.951	0.570465	0.94	0.993477	0.873735	0.921071	1.10104	1.05933	0.631695	0.938503	0.578281
		ALG10	0.814508	0.161789	0.429283	0.469	0.719518	7.8e-05	1.3284	0.802658	0.364447	0.436835	1.01353	0.954124	0.622411	0.000506859
		ALG10B	1.12662	0.932741	0.833353	0.601	1.0232	0.35	1.05808	0.572719	0.651293	0.51684	1.33898	7.63984e-05	0.753271	0.000201891
		ALG11	1.06142	0.461763	0.964598	0.872	1.22996	0.92	0.885992	0.818838	1.24439	1.16234	1.10886	0.567795	0.868303	0.392135
		ALG12	0.814508	0.0860524	1.19914	0.249	0.766782	0.27	0.973401	1.06732	0.698885	0.778597	0.887456	0.412305	0.938567	0.693591
		ALG13	1.25788	0.994394	1.05995	0.163	1.00182	0.77	0.982301	1.17454	1.02509	1.45145	1.11847	0.044643	0.739373	7.37473e-10
		ALG14	0.55787	0.0119915	0.785673	0.00417	0.617458	0.27	0.892932	0.601244	1.26846	0.944374	0.724072	0.00545764	0.730485	0.00652519
		ALG2	1.22859	0.80148	1.32134	0.106	1.04159	0.012	1.07248	1.60383	2.01806	1.77977	0.895586	0.220109	1.07865	0.417304
		ALG3	0.920826	3.37e-10	0.76897	0.618	0.504499	0.03	1.09204	0.811268	0.993113	0.544665	0.949686	0.601463	1.00131	0.992589
		ALG5	1.39668	0.000484605	1.2201	0.00604	0.674211	0.11	1.1189	0.823904	1.1466	0.680874	0.858115	0.0360683	1.19963	0.0069558
		ALG6	0.93174	5.04e-10	0.550189	0.709	0.469653	1.5e-06	0.89366	0.429839	0.413415	0.335981	0.905306	0.217243	0.725264	7.13791e-07
		ALG8	0.960595	4.74e-08	0.663883	0.802	0.591483	3.3e-05	0.989966	0.684789	0.36074	0.295196	0.950079	0.488538	0.992539	0.936262
		ALG9	1.04681	0.0503423	0.986917	0.857	0.721033	0.96	1.11564	0.59407	1.21518	2.97657	1.10525	0.651229	0.996846	0.991766
		ALKBH1	1.06363	0.0771759	0.869345	0.77	0.768627	0.41	1.07476	0.923998	0.971192	0.822144	0.948928	0.724367	1.104	0.422424
		ALKBH2	0.804966	0.389099	0.82302	0.22	0.859964	0.24	0.942552	0.601368	0.482396	0.312767	1.03063	0.821615	0.827924	0.0339845
		ALKBH3	1.15669	0.735667	0.961261	0.281	0.949597	0.81	1.01011	0.948394	0.773693	0.658865	0.874371	0.219979	1.03775	0.785479
		ALKBH4	0.759436	0.311556	0.916369	0.146	0.828656	0.69	0.780907	0.594328	0.756084	0.657734	0.958944	0.796447	0.726073	0.00229247
		ALKBH5	0.886996	0.830511	0.896267	0.382	0.966679	0.4	0.89699	0.945052	0.923296	0.679268	1.04185	0.377136	1.18753	3.77847e-07
		ALKBH7	1.18838	0.121698	1.6449	0.371	1.2856	0.00063	0.827529	1.3638	1.2127	1.14124	1.16403	0.21852	1.08339	0.56174
		ALKBH8	0.797745	4.77e-05	0.540737	0.181	0.573702	7.7e-06	0.978582	0.972676	0.975676	0.691284	0.906931	0.32725	0.796984	0.00537571
		ALMS1	0.785673	0.450627	0.577143	0.11	0.886022	1.1e-05	1.14618	0.622656	0.397724	0.46519	1.06529	0.473595	0.868405	0.0479986
		ALOX12-AS1	0.998615	0.585982	1.15429	0.997	1.18652	0.66	1.4013	1.25743	0.662905	1.05202	0.87737	0.716541	1.03245	0.937446
		ALPK1	1.32777	0.0859978	0.75106	0.102	0.755861	0.083	1.2218	0.670372	1.44063	0.467854	1.20789	0.250442	0.799106	0.155425
		ALPL	1.30134	0.187425	2.11111	0.421	0.683955	0.0021	0.899169	0.141268	0.730437	0.398178	0.732753	0.178987	1.50067	0.0414379
		ALS2	1.06585	0.143237	1.07624	0.702	1.19737	0.62	1.13037	0.902887	0.6883	1.36223	0.951883	0.574598	1.05027	0.554525
		ALX1	0.91764	0.0055052	0.604578	0.738	0.618309	0.0039	1.13224	0.640049	0.352326	0.465809	1.08229	0.751849	0.981372	0.945859
		ALX4	0.873573	3.16e-18	0.466516	0.43	0.354301	3.5e-10	0.801333	0.237215	0.400484	0.618543	1.2563	0.0824282	0.782055	0.0592992
		ALYREF	0.628071	0.000185702	0.775931	0.00105	0.611637	0.082	0.75541	0.664026	0.500036	0.694048	0.655029	1.82907e-27	0.879074	0.00302249
		AMBRA1	0.880259	0.960824	0.873573	0.341	1.00916	0.27	1.01732	0.927295	0.921699	1.08063	0.923511	0.300487	1.14229	0.0411966
		AMD1	0.968618	0.711258	0.704172	0.856	0.944794	0.0013	1.02212	1.2518	0.551231	0.643965	0.935798	0.0775746	0.744445	7.9821e-22
		AMDHD2	0.596668	0.00467639	0.985549	0.00651	0.607879	0.96	0.900688	1.07276	0.246272	0.305742	0.884131	0.42635	0.675162	0.00115187
		AMER1	0.927231	0.000232177	0.850864	0.811	0.475298	0.54	0.991657	0.867236	0.968585	0.905351	1.20704	0.0187168	0.868871	0.0990779
		AMFR	0.966606	0.136631	1.62902	0.848	1.19556	2.4e-06	1.03057	1.99015	1.54056	2.42711	0.929023	0.269876	1.33702	4.97781e-09
		AMH	1.21419	0.00116924	1.22774	0.627	2.36904	0.58	0.836315	0.721584	3.94668	11.85	1.11237	0.109266	1.65404	1.51502e-22
		AMIGO1	1.09051	0.0260552	0.936272	0.842	0.523587	0.87	1.07173	0.721285	0.307225	0.694126	1.11974	0.521469	1.00452	0.985201
		AMMECR1	0.497925	0.00951908	0.918276	3.64e-07	1.41971	0.64	1.12011	1.08216	2.37073	1.51644	0.604082	1.01265e-12	0.723537	1.06103e-05
		AMMECR1L	1.02883	0.00281261	0.978063	0.869	0.726878	0.89	0.601978	1.18929	1.68822	1.91412	0.866922	0.0142693	0.81769	0.000227263
		AMN1	0.653836	3.68e-05	0.222828	0.0578	0.452587	1e-13	1.12468	0.230157	0.0960855	0.350774	0.924168	0.850557	1.09088	0.82568
		AMOT	3.26481	6.37e-07	1.49174	7.92e-11	2.4387	0.049	1.17956	0.573742	0.698838	2.06012	0.84324	6.47526e-09	0.601373	1.07923e-75
		AMOTL1	0.943438	0.141649	0.944747	0.698	0.848329	0.68	0.988567	1.73249	0.746365	0.892154	1.04883	0.546835	0.788981	2.20347e-05
		AMOTL2	1.50943	0.0163814	1.44693	3.51e-05	0.783359	0.00011	0.788569	1.6631	0.700118	5.13438	0.900575	0.543934	1.31347	0.0347805
		AMPD2	0.727995	0.478974	0.82932	0.00686	0.907313	0.12	0.855292	0.755035	1.11972	1.40667	0.890457	0.0590445	0.89332	0.0618676
		AMZ2	1.07475	0.416573	1.03958	0.629	1.10926	0.8	1.01067	0.816103	1.00234	0.6272	1.32246	2.5028e-08	1.34027	3.6797e-09
		AMZ2P1	1.17528	0.884878	0.824162	0.462	0.962983	0.33	1.0318	0.56243	0.569886	0.507544	1.16009	0.409248	1.3536	0.0376524
		ANAPC1	0.901875	1.51e-13	0.424842	0.474	0.477676	1.6e-17	1.05016	0.631057	0.663916	0.558171	1.10124	0.0365986	0.952346	0.355495
		ANAPC10	1.20999	0.92794	1.04608	0.553	0.965041	0.9	1.10558	0.903223	0.705854	0.859893	0.91135	0.806491	1.40303	0.203756
		ANAPC11	0.96929	0.000305008	0.85441	0.882	1.56049	0.29	0.897258	0.999493	0.781167	0.664999	1.01934	0.83178	1.06857	0.323372
		ANAPC13	1.18921	0.893815	0.871154	0.186	1.02375	0.28	1.0037	0.626765	0.765776	0.629183	0.985495	0.910456	0.708467	4.44736e-06
		ANAPC15	0.964598	0.640251	1.27191	0.932	1.16385	0.42	0.893114	0.748403	0.502454	0.656527	0.923592	0.798482	0.933327	0.821123
		ANAPC16	1.29504	0.414363	1.18674	0.0364	1.11705	0.16	0.969912	0.712651	0.933486	0.634794	1.04453	0.618183	0.860507	0.0198693
		ANAPC2	0.753145	0.824751	1.14155	0.0466	1.04206	0.38	0.853821	1.19655	1.37503	1.00744	0.92016	0.261912	0.995227	0.963668
		ANAPC4	1.05336	0.0276908	0.764188	0.782	0.757442	0.035	0.962113	1.09048	0.6657	0.630648	1.23778	0.00664167	0.783298	0.00188622
		ANAPC5	0.929161	0.528863	0.922103	0.568	0.927921	0.49	1.00256	1.14776	1.19372	0.671238	1.02607	0.617601	0.922777	0.0352815
		ANAPC7	0.544499	2.46e-11	0.786762	8.05e-09	0.512744	0.032	0.927757	0.632974	0.48064	0.634359	0.759095	2.35284e-08	0.74124	1.21616e-09
		ANGEL1	1.01185	1.86e-05	0.844986	0.96	0.581454	0.27	1.05931	0.804693	0.720357	0.45798	1.22009	0.000586314	0.834112	0.00231193
		ANGEL2	0.579548	0.371167	0.91955	2.58e-05	1.1439	0.62	1.05018	0.564926	0.508787	0.462166	0.698649	3.21701e-11	0.703882	1.43575e-10
		ANK1	0.971981	4.98e-09	2.22684	0.943	3.28522	0.00021	1.48568	7.02618	5.38403	1.46066	1.40587	0.0155791	1.42363	0.0100226
		ANK2	0.5544	0.545322	0.702709	1.03e-05	0.903068	0.0085	1.26377	1.5839	2.82308	2.09914	0.692964	8.26141e-06	1.15001	0.131183
		ANK3	0.843231	4.21e-06	0.833931	0.396	1.92926	0.32	1.31484	1.16566	0.87745	1.94295	1.15202	0.196709	0.851017	0.125138
		ANKDD1A	1.04899	0.484721	1.31403	0.914	1.25409	0.38	0.676349	1.80752	1.12385	0.916863	0.873352	0.68217	0.807866	0.464898
		ANKFY1	0.80107	0.888464	0.49005	0.139	0.972234	2.6e-09	1.00062	0.842918	2.07419	2.25145	1.06439	0.230209	0.873634	0.0017768
		ANKH	1.11574	3.91e-07	0.984184	0.61	2.03234	0.95	0.907475	1.78569	1.23114	1.7826	0.939263	0.496566	0.716308	3.93545e-07
		ANKHD1	1.25527	0.973458	0.915099	0.535	0.983515	0.83	0.789092	1.0429	0.869246	0.994639	1.0294	0.937939	1.26572	0.365232
		ANKIB1	1.08298	0.00951171	1.01819	0.599	1.32368	0.92	0.648121	1.37119	1.49276	1.56155	1.23799	0.00236181	0.872418	0.0747043
		ANKLE1	0.511923	2.72e-17	0.426909	4.49e-05	0.274237	3.4e-08	0.957371	0.229682	0.222064	0.304193	1.29266	0.332487	2.04507	0.000381334
		ANKLE2	1.05409	0.709654	0.885154	0.716	0.950546	0.28	0.914105	1.33171	0.794906	1.02504	0.94882	0.280769	0.898747	0.00834611
		ANKMY1	0.882703	0.48966	0.993781	0.65	1.17675	0.98	1.18474	1.09192	1.05494	1.03161	1.19261	0.21275	1.01186	0.954418
		ANKMY2	1.2033	0.141431	0.698339	0.212	0.819481	0.0039	1.23386	1.25931	0.74918	1.58615	1.01078	0.953773	0.775426	0.0238437
		ANKRA2	1.32501	0.0360179	1.32777	0.135	1.41458	0.1	1.11526	1.10045	0.779529	0.739161	0.963562	0.854019	1.32306	0.0262108
		ANKRD10	1.19086	0.0537706	1.34443	0.164	1.23838	0.0051	1.1538	0.884624	1.42838	1.46844	1.00825	0.935084	0.766111	2.17512e-06
		ANKRD11	1.15269	0.645306	0.990343	0.264	0.938108	0.96	0.943426	0.936828	0.951261	0.86684	0.857651	0.001352	1.2455	6.11065e-07
		ANKRD12	1.25876	0.00869979	1.26488	0.0983	1.37523	0.067	1.27636	1.20037	0.95927	1.01809	0.932397	0.606245	0.924468	0.533719
		ANKRD13A	0.79664	0.0373906	1.13603	0.116	0.764749	0.39	1.12714	3.73733	0.93671	1.14658	0.946664	0.537618	1.05277	0.547296
		ANKRD13B	0.793334	0.000122539	0.974004	0.0532	0.675004	0.87	0.977406	0.927068	0.836868	0.686905	1.13244	0.113688	0.831293	0.0107452
		ANKRD13C	1.17121	0.00963128	1.08598	0.281	1.35885	0.6	0.973518	0.519877	1.04509	1.20134	1.01972	0.839428	0.971084	0.736185
		ANKRD13D	0.746907	0.594316	1.01396	0.0351	0.917186	0.95	0.953626	1.33915	0.888143	0.777499	1.00426	0.977897	1.00184	0.990779
		ANKRD16	0.616854	0.000928814	0.677362	0.0136	0.558678	0.037	0.898509	0.63086	0.588529	0.404012	1.09049	0.653544	1.085	0.663459
		ANKRD17	0.913198	0.0774578	0.618566	0.526	0.821082	1.5e-06	1.0116	0.844764	1.1989	1.00296	1.01122	0.848528	1.01026	0.8565
		ANKRD24	1.31768	3.47e-10	0.335876	0.189	0.346587	2e-10	0.942168	0.052141	0.342998	0.324434	1.50639	0.0747513	1.89853	0.00158969
		ANKRD26	1.19251	0.168789	0.883928	0.192	0.841371	0.37	1.08207	0.743212	0.585069	0.723374	1.23192	0.0111765	0.953344	0.674508
		ANKRD27	1.05629	0.286953	0.978742	0.766	0.860953	0.91	0.86232	1.47087	0.661928	0.66855	1.05604	0.463248	0.993936	0.949329
		ANKRD28	0.99103	7.12e-09	2.0181	0.964	1.80016	3.1e-12	0.968489	3.42845	1.19868	4.80491	1.06561	0.394498	0.968597	0.703997
		ANKRD36	0.752623	0.22737	1.20414	0.232	1.29311	0.42	1.04871	1.24722	0.479125	0.77909	0.994837	0.982196	1.48631	0.000713854
		ANKRD36B	0.714992	0.350707	1.41519	0.21	1.26666	0.14	1.24971	1.38445	0.641045	1.03985	0.86239	0.537013	1.09908	0.704012
		ANKRD36C	0.743291	0.252397	1.47836	0.148	1.24612	0.024	1.13576	0.806038	0.562402	0.878083	1.14148	0.537621	1.85647	2.21774e-05
		ANKRD39	0.741747	0.766679	0.933033	0.386	0.894257	0.86	0.828369	0.879326	0.476966	0.43373	0.844424	0.607113	1.00581	0.989493
		ANKRD40	1.13761	0.0361319	0.77164	0.358	0.786545	0.023	0.999581	0.953205	0.785733	1.02753	1.16586	0.00664493	0.842169	0.00194374
		ANKRD42	1.48247	1.02e-05	1.36037	0.0116	1.81926	0.041	1.10957	1.11576	1.22907	0.593062	1.18929	0.181888	0.926983	0.624144
		ANKRD44	0.654743	0.601566	0.523405	0.0388	0.882872	0.00033	1.01105	0.589942	0.798838	2.72668	0.938501	0.817232	0.834311	0.401825
		ANKRD46	0.757858	3.34e-06	1.17691	0.0682	1.7604	0.28	0.793188	0.698453	1.81192	1.07187	0.853484	0.0878749	0.92935	0.494673
		ANKRD49	1.10191	0.158263	0.988971	0.62	1.23695	0.96	1.31965	0.831182	0.653938	0.665604	0.891882	0.376577	0.925457	0.56787
		ANKRD50	1.07773	1.41e-09	1.00069	0.702	2.08099	1	1.11957	1.57207	1.06826	1.49205	1.07368	0.495977	0.762591	0.000502272
		ANKRD52	1.07624	1.66e-07	0.768438	0.672	1.79374	0.034	1.18454	1.3169	2.32176	2.27965	1.28572	0.00200668	0.949639	0.63859
		ANKRD54	1.07252	0.855392	0.990343	0.699	1.03484	0.96	0.91671	0.925697	1.10446	0.925665	1.008	0.947578	1.00894	0.939531
		ANKRD6	0.989657	0.0122082	0.86334	0.97	0.671322	0.45	1.00697	1.06181	1.33895	2.53092	1.12554	0.542201	0.860703	0.405965
		ANKRD9	0.685391	0.000640061	0.720465	0.0315	0.591161	0.047	0.938201	0.739141	0.683025	1.09178	0.971085	0.807129	0.913155	0.318616
		ANKS1A	1.09051	1.41e-07	0.900002	0.589	1.7506	0.46	1.00528	0.745402	0.797727	0.751573	1.00968	0.918863	0.858765	0.00747096
		ANKS3	1.03814	0.657074	1.25701	0.869	0.918968	0.14	0.85557	0.992642	1.51697	1.02471	0.851197	0.0777686	1.4411	1.24214e-06
		ANKS6	0.631126	0.0110494	0.988971	0.0572	0.577578	0.98	0.931714	0.847705	1.06907	0.816156	0.889953	0.0671614	0.9089	0.138233
		ANKZF1	0.873573	0.267313	1.49278	0.437	1.18076	0.0018	1.07799	1.03637	1.2654	0.786834	1.01327	0.906318	0.812765	0.00204565
		ANLN	0.557483	8.36e-08	0.45125	1.58e-07	0.56561	2.8e-14	0.993096	1.06076	0.115676	0.345557	0.87665	0.00265013	1.03701	0.514322
		ANO10	0.889459	0.209642	1.56266	0.573	0.810094	0.0019	0.956643	3.05737	1.63132	1.16353	0.961509	0.77527	0.803536	0.0185836
		ANO5	1.15669	6.61e-17	0.76313	0.531	0.235362	0.16	1.11063	0.241238	0.541935	1.08506	1.26147	0.0124508	0.782905	0.00958189
		ANO6	0.933033	0.235505	1.14631	0.649	0.866896	0.26	1.16592	1.54251	3.40509	3.14224	0.99521	0.969631	0.877835	0.0871935
		ANO8	0.712519	0.160179	0.980099	0.0632	1.27814	0.94	0.882972	1.08281	1.04431	0.784642	1.10859	0.275093	0.992441	0.954929
		ANP32A	0.649319	0.0169011	0.660211	2.9e-06	0.797658	2.4e-06	0.848968	0.535001	0.596797	0.520387	0.876106	2.63122e-05	0.834333	1.75091e-09
		ANP32B	0.853226	0.00106211	0.720465	0.177	0.728221	0.00071	0.900183	0.793925	0.664844	0.671746	0.878162	0.000118636	0.790627	7.62115e-14
		ANP32E	0.660669	2.8e-09	0.411225	2.1e-05	0.585176	9.4e-24	0.921397	0.375797	0.225062	0.166003	0.888127	0.00162321	0.819551	1.04876e-08
		ANTKMT	0.831622	0.99159	1.11884	0.471	1.00369	0.66	0.833323	1.22823	1.19235	2.98147	0.940647	0.664347	0.674676	3.93064e-05
		ANTXR1	1.15029	2.53e-28	0.74072	0.24	0.377292	0.0019	1.0225	0.725373	0.827012	2.37704	0.908757	0.160937	0.844654	0.00443004
		ANTXR2	1.2518	2.35e-27	2.04627	0.145	3.40624	1.8e-09	1.30983	5.35277	3.36956	2.46827	0.928425	0.730972	1.03507	0.881468
		ANXA1	0.75054	0.00045099	1.50525	0.0115	1.42948	4.8e-05	1.42447	1.60694	1.48234	2.3241	0.474294	0.0118074	1.83806	0.0225346
		ANXA11	1.06511	0.051917	1.15589	0.688	1.24409	0.23	0.923094	1.8258	0.959191	1.10951	1.00791	0.927803	0.844422	0.000705074
		ANXA2	1.05555	7.79e-26	2.06337	0.718	2.58174	2.5e-15	1.06154	3.11591	2.09533	3.01626	1.11602	0.0596343	0.98258	0.831963
		ANXA3	5.76372	5.96e-05	6.16884	2.8e-09	3.3017	1.1e-10	1.81183	11.1327	1.26485	#VALUE!	1.66958	0.0365055	1.66093	0.0342952
		ANXA4	1.09809	0.0166151	3.24676	0.671	1.437	8.8e-19	1.05507	5.45897	2.5954	1.93672	0.979068	0.923729	1.22409	0.155434
		ANXA5	1.40542	0.72516	0.941478	0.00105	0.951893	0.66	1.14116	2.26768	1.82976	3.20744	1.00618	0.930242	0.944952	0.22709
		ANXA6	0.758384	0.822958	1.55725	0.01	0.967478	2.3e-06	0.863588	2.29393	1.64867	1.26463	1.05375	0.389095	0.864697	0.00238672
		ANXA7	0.827597	0.171073	0.915099	0.13	0.850711	0.51	0.963871	1.18968	0.878292	0.875297	0.965237	0.700509	0.91031	0.185509
		AOPEP	1.52626	6.39e-17	3.57762	0.00656	2.92559	1.6e-23	1.08882	3.69866	0.929229	2.64876	1.08995	0.62563	0.970123	0.881593
		AP1AR	0.986233	0.660838	0.721464	0.951	0.925819	0.014	0.97506	0.706308	0.757706	0.449708	0.89397	0.150312	0.718835	2.65985e-07
		AP1B1	0.944092	0.722514	0.792784	0.714	0.948875	0.035	0.965512	1.23394	1.1922	1.21616	1.00297	0.964169	0.92251	0.036152
		AP1G1	1.03958	0.0632312	0.760489	0.794	0.827755	0.0044	1.08112	0.819917	1.19246	1.48058	1.02676	0.668178	0.826797	2.55196e-06
		AP1G2	0.97942	0.19279	1.40542	0.958	1.37338	0.16	1.29218	1.26531	1.10968	1.3066	0.94086	0.595317	0.88041	0.16894
		AP1M1	0.899378	0.00251717	0.945402	0.424	1.35144	0.68	0.930272	1.54049	0.993193	1.34359	0.89335	0.0415638	1.00633	0.941667
		AP1S1	0.959929	0.900561	0.945402	0.853	1.02815	0.78	0.970792	1.2788	0.774293	0.510049	1.05783	0.528448	1.01552	0.885433
		AP1S2	1.33607	4.32e-16	1.85318	0.00693	2.09607	2.5e-11	1.18362	2.4107	1.15082	0.776389	0.974681	0.776559	0.685031	4.87142e-12
		AP1S3	1.64262	3.33e-11	0.449378	0.0175	0.28316	3.6e-05	1.07426	0.525251	0.248653	0.736258	0.9184	0.623603	0.75712	0.0334499
		AP2A1	0.776469	0.589298	1.18099	0.0433	0.92407	0.18	0.944502	1.53939	1.48274	1.30548	1.00186	0.984729	0.867561	0.00942515
		AP2A2	0.955945	0.552771	0.958599	0.757	1.07602	0.76	0.937354	1.17669	0.826745	0.95726	1.00259	0.977257	0.895963	0.0329156
		AP2B1	1.03025	0.486747	0.803294	0.845	1.08701	0.026	1.1102	0.857046	1.81111	1.61283	1.08394	0.0328409	0.861619	1.01296e-05
		AP2M1	0.99103	0.000292314	1.35285	0.957	1.40424	0.0015	0.94882	1.65767	1.26566	1.25934	1.07017	0.0786127	1.03007	0.510362
		AP2S1	0.958599	1.49e-05	0.764188	0.845	0.569199	0.062	0.852763	1.00228	0.963318	0.713265	0.896717	0.0661044	1.11733	0.0495654
		AP3B1	1.06733	0.30007	0.948027	0.659	1.13052	0.7	1.05039	1.22642	1.11879	0.933629	1.00897	0.931784	0.872135	0.0312933
		AP3B2	0.99654	2.22e-07	1.02669	0.992	0.327045	0.94	1.63555	0.118174	0.433793	1.16256	1.14056	0.469688	1.09318	0.639991
		AP3D1	1.01326	0.909339	1.09126	0.943	0.980428	0.52	0.911307	1.37578	1.61475	1.75599	1.10426	0.00137797	1.05293	0.131496
		AP3M1	1.00626	0.518376	0.764718	0.974	0.916484	0.013	1.00061	0.656578	0.487275	0.56591	0.890967	0.0297719	0.778173	9.78157e-08
		AP3M2	1.01748	0.0973313	0.611744	0.925	0.82745	1.5e-06	0.951459	0.750664	0.303316	0.297553	1.06173	0.53999	0.777135	0.00038727
		AP3S1	1.31585	0.159117	1.39765	0.0142	1.17341	0.00088	0.994132	1.42492	1.20162	1.42058	1.06723	0.428206	0.808081	0.000773601
		AP3S2	1.22774	0.48241	1.36226	0.301	1.15	0.065	1.15381	0.85036	1.43694	1.2775	1.09732	0.394498	0.767938	0.00241364
		AP4B1	0.915734	1.46e-13	0.488693	0.631	0.410013	5.7e-09	0.999	0.707444	0.493898	0.30951	0.96287	0.828597	0.834872	0.140635
		AP4E1	1.04247	0.287695	0.857376	0.849	1.18314	0.35	1.11839	0.867915	0.619889	0.674105	1.23802	0.0132001	0.970184	0.816142
		AP4M1	0.755236	0.712256	0.978063	0.0991	0.928138	0.92	0.976797	0.754684	0.275174	0.488097	0.95683	0.846238	0.798463	0.162623
		AP4S1	1.54864	0.365085	0.926588	0.0194	1.20494	0.76	0.969655	0.845781	0.844394	1.27491	1.14932	0.361783	0.719347	0.0100892
		AP5B1	0.776469	0.793365	0.858565	0.033	1.04138	0.2	1.04407	1.00482	0.641889	1.16961	0.893862	0.0979753	0.757206	1.38215e-06
		AP5M1	0.792784	0.000626634	0.921464	0.0996	0.664822	0.61	1.1444	0.698883	1.04771	1.21566	0.853298	0.0460971	0.655117	9.669e-10
		AP5S1	0.833931	0.94964	0.798852	0.382	1.01722	0.22	0.907497	1.04377	0.706106	0.632791	1.00081	0.997164	0.682812	0.00467951
		AP5Z1	0.886996	0.961913	1.10038	0.488	0.989183	0.57	0.911761	1.77727	1.74862	1.74581	0.814473	0.00311417	1.04896	0.601682
		APAF1	0.736113	0.155133	0.99516	0.0404	1.22877	0.98	1.18182	1.00674	1.01337	1.39849	1.09587	0.288713	0.938773	0.490226
		APBA2	1.17772	0.975668	1.48761	0.532	1.01075	0.045	0.886546	0.90532	0.76202	0.339081	1.00295	0.984483	0.79328	0.00483005
		APBA3	0.808881	0.900561	0.844401	0.327	0.966439	0.42	0.867315	1.14291	0.946928	0.883243	0.921564	0.584996	0.956274	0.779153
		APBB1	1.17121	0.229777	0.695923	0.243	0.859804	0.00089	0.858489	0.455168	0.414788	0.688413	0.942239	0.415899	1.17597	0.00365447
		APBB2	1.21504	0.0793979	1.44995	0.335	1.34427	0.023	1.35643	2.26244	2.99644	0.764474	0.991229	0.964835	0.727298	0.00549736
		APBB3	0.97468	0.275861	1.17609	0.931	1.23695	0.44	1.00834	1.02292	0.969796	0.992055	1.12963	0.392834	0.901212	0.473138
		APC	0.83047	0.0377178	0.586417	0.232	0.759716	1.2e-05	1.2151	0.926405	0.709602	0.791982	0.913295	0.161609	0.959317	0.578071
		APC2	1.08073	1.78e-08	3.07801	0.865	3.91848	7.8e-06	1.18923	2.81217	3.76165	8.89802	0.998724	0.993571	3.70968	2.53671e-82
		APCDD1	1.69819	1.62e-59	0.702222	8.37e-08	0.225096	0.00035	0.764146	0.270132	0.398559	0.186678	1.47995	0.186537	1.46668	0.182046
		APEH	0.775393	0.0158668	0.716978	0.0848	0.728612	0.011	0.969274	1.03838	0.335615	0.372054	0.987976	0.876577	0.86366	0.00200604
		APEX1	0.935623	0.260782	0.913198	0.659	0.874325	0.49	0.89613	0.70447	0.521592	0.366309	0.960246	0.392715	0.86826	7.72542e-05
		APEX2	0.905006	0.000117591	0.620284	0.566	0.624986	0.00011	0.919388	1.03905	0.640875	0.710407	0.978297	0.855437	0.829361	0.0141023
		APH1A	0.883928	0.485152	0.961927	0.355	1.09561	0.8	0.862589	0.794874	0.436457	0.518477	0.97348	0.640835	0.834957	2.28153e-06
		APH1B	2.13465	6.62e-14	2.59188	1.83e-06	2.96102	1.2e-10	0.981674	1.48713	1.61295	1.74857	2.08005	9.18768e-08	0.79521	0.200465
		API5	1.01677	3.55e-06	0.931095	0.918	0.661451	0.56	0.987247	0.868666	0.69808	0.859089	0.93428	0.145763	0.773416	7.53607e-12
		APIP	1.11806	0.0646099	0.896267	0.395	1.21887	0.37	1.0894	0.902252	0.942723	0.817191	0.905869	0.338552	0.980359	0.881856
		APLF	1.03311	0.880041	0.682074	0.937	0.944143	0.17	0.968655	1.40983	0.882647	0.582377	1.03954	0.924127	1.38947	0.222176
		APLP1	0.583175	0.131263	0.64038	0.00108	0.774354	0.0047	1.41502	0.461872	0.51887	0.522607	1.20766	0.0802677	1.14392	0.237511
		APLP2	1.42899	2.48e-05	1.78262	0.00133	1.5347	5.6e-09	0.91769	2.41069	2.03638	1.50854	0.967586	0.372558	0.826794	6.45717e-13
		APMAP	0.942785	0.836108	1.45297	0.741	1.03751	0.0013	0.789808	0.899324	1.72644	1.8643	0.98767	0.883108	0.841028	0.000696211
		APOBEC3B	1.60882	0.0254962	0.700278	0.0311	1.57585	0.12	0.949451	2.13549	0.522855	5.87741	1.37047	0.27636	1.12747	0.731992
		APOBEC3C	0.864537	0.129897	1.27456	0.358	0.815305	0.061	0.80821	1.39092	0.929817	2.76453	0.948398	0.693653	0.86529	0.16256
		APOBEC3F	0.988286	0.000709176	2.2548	0.976	1.92973	1.9e-05	0.945007	1.59232	2.63479	1.76683	1.19975	0.563853	1.17225	0.607168
		APOE	0.866337	2.43e-24	6.90672	0.433	3.49292	1.7e-57	0.841808	2.59943	3.52843	3.20458	1.03578	0.842041	2.20358	6.195e-17
		APOL2	0.668037	0.0254268	1.14472	0.00169	1.3166	0.34	0.946828	1.51566	1.23039	1.86734	1.09901	0.542295	0.958927	0.81196
		APOLD1	2.38171	9.58e-05	1.8609	1.29e-12	1.62532	3.5e-07	1.15277	7.08003	2.25625	3.38939	1.03774	0.915913	1.13161	0.670353
		APOO	0.806642	0.000114752	0.681129	0.138	0.631115	0.0018	0.960388	0.678156	0.798463	0.616995	0.847083	0.142772	1.07922	0.552489
		APOOL	1.00765	0.244331	0.693035	0.975	0.837229	0.0072	0.8983	0.816987	1.21083	0.838852	1.11673	0.213785	0.854024	0.0509167
		APP	1.25006	0.00135802	1.07773	0.0371	1.35257	0.54	0.819665	1.39126	1.41436	1.33427	1.15504	9.23791e-05	0.799845	1.53982e-10
		APPBP2	1.27103	2.8e-09	1.30044	0.0621	1.86082	0.024	1.06258	0.937046	1.50526	1.42503	1.16623	0.00796108	0.795982	3.53911e-05
		APPL1	0.812252	0.176242	0.729005	0.19	0.820441	0.02	1.03934	0.604963	0.748513	0.695631	1.09358	0.099956	0.781622	9.50432e-08
		APPL2	0.774319	1.39e-05	1.66671	0.0701	1.64876	9.6e-06	1.05513	2.1686	1.11535	1.41675	0.813093	0.0234228	0.737143	0.000339511
		APRT	1.00208	0.735444	0.917004	0.993	0.940949	0.61	0.984493	1.01824	0.602612	0.318325	0.871397	0.00265567	0.961914	0.503452
		APTR	0.857971	0.14614	1.38127	0.472	0.774989	0.05	0.854828	0.98113	1.0719	1.1054	0.782427	0.0956689	1.12001	0.494741
		APTX	0.998615	0.000614433	1.00347	0.993	0.680406	0.99	1.03043	0.989286	0.927052	0.713671	1.00312	0.979009	0.915556	0.234862
		AQR	0.928517	0.0517008	0.772711	0.657	0.789383	0.032	1.18418	0.93471	0.753227	0.827584	1.08062	0.349326	1.01444	0.894112
		ARAF	0.985549	0.119333	0.920188	0.94	0.82644	0.57	0.865404	0.786809	1.12615	1.14288	1.08536	0.235854	0.828986	0.00105295
		ARAP1	0.846745	0.79987	0.986917	0.205	1.04113	0.94	0.87834	1.1611	1.09303	1.38515	0.867475	0.0290165	0.871524	0.0320793
		ARAP3	1.57352	0.00173143	0.655651	0.0199	0.566579	0.027	0.79576	1.12347	0.796385	1.35633	0.719429	0.192233	1.22964	0.426169
		ARC	0.978063	6.44e-08	0.504526	0.91	0.546501	1.1e-09	0.945951	0.355096	0.824819	18.1267	0.362355	1.67292e-18	1.37576	0.00694693
		ARCN1	1.06142	0.0209793	1.03814	0.641	1.23361	0.77	0.935678	1.8581	1.48569	1.91995	0.887944	0.000297772	1.04115	0.307705
		AREL1	0.91955	0.305017	0.7285	0.562	1.13234	0.0022	1.08465	0.781511	1.18096	1.37585	1.08609	0.257311	0.823055	0.00123189
		ARF1	0.886382	0.268029	1.00975	0.318	1.13013	0.95	0.800487	1.04491	0.647205	0.883709	0.818684	1.0864e-10	0.853852	4.2034e-07
		ARF3	1.01819	3.15e-05	1.14472	0.916	1.49215	0.24	0.870614	0.964153	1.00707	0.594139	1.12348	0.00987011	0.711456	4.52658e-17
		ARF4	1.20497	2e-06	1.62676	0.179	1.68387	1.1e-05	0.953659	2.07289	1.33839	1.49261	0.985467	0.82561	0.782025	1.10472e-10
		ARF5	0.907519	1.77e-09	1.43396	0.534	1.87719	0.0012	0.916195	1.32071	0.725779	0.922754	1.03923	0.583175	1.12942	0.0175864
		ARF6	0.428391	0.463602	1.03958	8.95e-19	1.09617	0.79	0.901044	1.52565	1.05731	1.35128	0.540215	2.79743e-43	0.80361	4.38237e-06
		ARFGAP1	0.84792	0.00521515	1.31585	0.195	1.34078	0.0099	0.878294	1.97578	1.71087	1.88338	0.901491	0.036899	0.790669	6.27445e-08
		ARFGAP2	0.841479	0.953914	0.99447	0.189	1.01092	0.98	0.935757	1.06479	0.709583	1.10285	0.927036	0.260432	1.08035	0.224533
		ARFGAP3	1.10573	0.049775	1.62789	0.553	1.28671	3.1e-05	1.03543	2.44905	1.96589	3.08302	0.889926	0.207689	0.724623	2.12235e-05
		ARFGEF1	0.879649	0.894338	0.913198	0.391	0.975768	0.54	1.01442	0.996469	0.82398	1.00578	1.11426	0.127689	0.801676	0.00037409
		ARFGEF2	1.03168	0.85549	0.877214	0.872	0.967331	0.36	1.17202	1.27165	1.62565	1.57947	1.10402	0.14909	0.875081	0.0340862
		ARFGEF3	1.39281	0.0164307	2.7283	0.152	1.60176	1.5e-08	1.11463	4.81	8.35177	2.10097	0.976234	0.867545	0.926661	0.498288
		ARFIP1	1.16151	0.000176424	1.01889	0.284	1.49647	0.92	1.02792	1.2325	1.40332	1.75838	1.02854	0.834538	0.779588	0.00343366
		ARFIP2	0.946714	0.13046	0.815637	0.782	0.80954	0.15	0.934917	1.29438	1.41826	1.42217	0.892498	0.0280698	0.707775	1.20144e-14
		ARFRP1	0.693035	0.298831	1.11419	0.0198	1.18595	0.55	0.925614	1.52438	0.40697	0.887433	0.827224	0.0359203	0.62691	4.8115e-09
		ARG2	0.790041	0.00029384	0.458184	0.181	0.593851	3.6e-08	0.989652	0.331429	0.593511	0.264235	0.928907	0.702839	1.06483	0.740201
		ARGLU1	1.11574	0.947068	0.876606	0.434	0.988208	0.29	1.05922	1.09903	0.887579	1.04602	1.10175	0.0984987	0.742011	8.53282e-10
		ARHGAP1	1.13603	0.000772256	1.48761	0.287	0.727693	1.5e-05	0.985359	1.99183	1.58897	2.27073	1.09106	0.276264	0.842714	0.0122094
		ARHGAP10	1.67133	0.0703458	1.44393	0.00544	1.39598	0.044	1.18554	1.77794	0.859541	1.0954	1.00104	0.995378	1.09979	0.499405
		ARHGAP11A	1.04102	0.455366	0.52268	0.838	0.892094	2.4e-08	1.10274	0.563557	0.15674	0.291135	1.02264	0.813315	0.833197	0.00227241
		ARHGAP12	1.60103	3.7e-14	1.91587	0.000141	2.29911	8.4e-09	1.17128	0.991274	1.4355	1.54735	1.36968	0.0132142	0.92264	0.641764
		ARHGAP17	0.870551	5.47e-05	0.712025	0.245	0.686477	0.00034	0.868865	0.670008	0.66319	2.04811	0.845914	0.00156826	0.87677	0.0152051
		ARHGAP18	1.07699	0.942507	0.629379	0.69	1.0155	0.00018	1.26228	2.00047	1.10145	0.947675	0.959959	0.85141	0.672894	0.00438263
		ARHGAP19	0.959264	1.15e-40	0.413225	0.803	0.26256	1.7e-18	1.01752	0.0965001	0.229343	0.277141	1.01839	0.863873	0.764959	2.00702e-05
		ARHGAP21	0.778085	0.131596	0.82932	0.0778	1.22651	0.18	1.09046	1.31485	0.879962	1.90911	1.05246	0.446574	0.712027	1.6062e-12
		ARHGAP26	1.24229	0.0050456	0.835088	0.134	0.705783	0.2	1.32308	0.657721	1.34087	1.45573	1.12952	0.348925	1.0125	0.944136
		ARHGAP29	2.73019	9.66e-50	7.9668	9.38e-13	6.73857	1.2e-58	0.969206	14.912	4.20803	6.28029	1.33262	0.00090787	0.767608	0.00330366
		ARHGAP31	0.885768	4.69e-05	1.02669	0.469	1.62063	0.89	0.975278	1.50966	1.09404	1.27417	0.868096	0.538215	1.60229	0.00365673
		ARHGAP32	0.735094	0.61392	0.661586	0.0118	0.927647	0.00017	1.11214	0.892097	0.766029	0.845787	1.04891	0.730901	0.945778	0.666695
		ARHGAP33	0.898755	0.0393389	0.506628	0.673	0.687769	7.6e-05	0.79403	0.598777	0.291606	0.658551	0.951803	0.73951	1.6169	5.55998e-08
		ARHGAP35	0.866337	0.837703	0.693515	0.297	1.03427	0.00067	0.949439	0.852075	0.660683	0.676996	0.964741	0.593184	0.904715	0.0491018
		ARHGAP39	1.03814	0.380796	1.00208	0.832	1.12272	0.99	0.80127	0.959115	1.10718	0.800739	0.928991	0.424266	1.0343	0.744167
		ARHGAP4	0.660211	0.02257	0.51086	0.00117	0.752367	6.8e-09	1.00582	0.719048	0.317301	2.83124	1.6077	0.0436577	1.82494	0.00574146
		ARHGAP42	2.4863	1.11e-07	1.83401	8.5e-11	2.07088	1.7e-05	1.2973	1.9197	1.80725	29.9683	1.33921	0.0675837	0.926594	0.725291
		ARHGAP44	0.895646	7.34e-25	3.39874	0.827	11.99	4e-06	0.96047	8.79928	1.28451	1.30207	1.25942	0.0326357	0.930232	0.603838
		ARHGAP45	0.738157	0.0915538	1.01466	0.112	1.33603	0.96	0.803311	1.03411	1.09164	1.80746	1.02178	0.906533	1.93111	8.46168e-12
		ARHGAP5	0.99447	0.556225	0.687294	0.984	1.11987	0.015	1.38787	1.12066	1.79594	3.22645	1.20318	0.0133326	0.831464	0.0134358
		ARHGDIA	0.860949	0.0698604	0.702222	0.22	1.21313	0.00031	0.828011	1.01833	0.719347	0.967539	1.01576	0.826692	0.911874	0.0467441
		ARHGEF1	0.680657	0.247291	0.68302	0.00208	0.855162	0.0011	0.906232	0.677372	0.568485	0.528311	0.861615	0.0260811	1.03132	0.73406
		ARHGEF10L	0.844401	0.018698	5.61389	0.735	2.09048	4.5e-10	1.0944	3.33206	5.27408	3.06701	1.09688	0.668178	1.78993	2.27779e-05
		ARHGEF11	0.948684	0.727261	1.33515	0.79	1.06445	0.028	0.968348	1.18409	1.57941	1.60205	1.08544	0.2705	0.792802	0.000104145
		ARHGEF12	1.03025	0.221474	0.647073	0.847	0.874124	2.3e-06	1.20484	0.94732	0.898923	1.39419	1.10658	0.0235685	0.780428	3.45513e-10
		ARHGEF16	0.652477	0.0186477	0.535144	0.0362	0.646219	0.00053	1.09784	0.775741	0.58095	1.15217	0.878021	0.58416	0.717282	0.0757842
		ARHGEF17	0.987601	5.43e-06	2.06194	0.95	1.63589	6e-12	1.10715	1.98814	1.74457	2.44773	1.36937	0.0213349	0.935626	0.726658
		ARHGEF18	1.03025	0.474437	0.895646	0.871	0.903074	0.43	0.946888	1.0989	0.745576	0.904648	1.00033	0.997164	0.994749	0.962598
		ARHGEF19	1.12428	0.347131	1.09126	0.721	0.778223	0.78	1.18821	1.04585	0.738797	0.992725	1.21484	0.595317	0.744008	0.376319
		ARHGEF2	1.2518	0.000269023	1.01115	0.0991	1.5157	0.95	1.03331	1.31676	0.998046	0.606059	0.941336	0.446175	0.967431	0.702261
		ARHGEF25	0.645281	0.0514012	1.74594	0.0987	1.55506	0.011	0.932807	1.16846	0.633144	0.713963	1.08288	0.717048	0.907164	0.636857
		ARHGEF26	0.722465	7.37e-17	0.475989	0.0803	0.270772	2.7e-06	0.964612	0.456296	0.351557	0.504311	1.02146	0.86656	0.598088	1.71112e-12
		ARHGEF28	1.6077	0.248113	1.69466	0.00674	0.801328	0.001	1.92609	6.9688	0.504465	0.434024	1.40702	0.188242	2.72319	4.80031e-07
		ARHGEF3	2.62806	0.000968969	2.54912	9.74e-05	2.20313	7.2e-05	1.1931	2.38673	0.828229	0.676776	1.1244	0.443316	1.24629	0.0800329
		ARHGEF39	0.604578	0.0151966	0.34772	0.00798	0.648803	7.2e-10	1.13265	0.373687	0.0527532	0.0924405	0.964332	0.789943	0.663549	1.0194e-06
		ARHGEF4	0.952638	0.815518	2.9897	0.913	1.09364	3.4e-06	0.937161	1.39856	0.596736	0.482529	1.09725	0.4864	0.867744	0.229896
		ARHGEF40	0.628071	0.0561325	1.01889	6.9e-06	1.2289	0.91	0.827949	1.17619	0.912411	2.31994	0.877453	0.348925	1.1599	0.24496
		ARHGEF6	0.664343	0.188107	0.871758	0.00297	1.20655	0.38	0.829192	0.610201	1.30427	0.619802	0.895357	0.393782	1.23484	0.0444767
		ARHGEF7	1.27015	0.789313	0.942131	0.0413	0.959765	0.68	1.05253	1.04022	1.05396	1.33683	1.13749	0.0448113	0.865299	0.0207686
		ARID1A	1.01045	0.514568	0.656561	0.957	0.914531	5.1e-05	0.942097	0.610508	0.716251	0.73809	1.07629	0.125879	0.97611	0.686365
		ARID1B	1.0196	0.995136	0.931095	0.91	1.00113	0.6	0.95858	0.975117	0.917661	0.996026	1.08092	0.164834	0.930692	0.196174
		ARID2	0.940174	7.09e-07	0.554785	0.723	0.576819	1.1e-07	1.11315	0.579632	0.499345	0.601093	0.954608	0.661487	0.879141	0.110139
		ARID3A	1.08523	0.127549	1.00486	0.74	0.758783	0.99	0.919222	0.54505	0.940246	1.52955	1.15608	0.0550851	0.898731	0.183578
		ARID3B	1.20414	2.68e-05	0.609205	0.354	0.521529	0.002	0.959125	0.265992	0.361762	0.76168	1.05946	0.349118	0.803187	3.75927e-06
		ARID4A	1.20247	0.527015	0.981459	0.231	1.10768	0.93	1.00839	0.56965	0.907606	1.55164	1.14235	0.194984	1.12463	0.248812
		ARID4B	1.73147	0.00364828	1.34817	3.71e-07	1.37522	0.0073	1.13948	0.886115	0.846573	0.883502	1.1168	0.0648819	1.33868	4.94212e-09
		ARID5A	1.66786	1.73e-10	1.85703	0.00204	2.4938	4.1e-05	1.01246	1.9618	1.76888	9.67455	0.893437	0.456679	0.86164	0.276642
		ARID5B	1.29684	6.79e-10	2.5088	0.0737	2.06321	2.1e-15	1.25331	2.97376	2.4592	6.96082	0.751463	0.0113152	1.04444	0.785803
		ARIH1	1.09809	0.0956366	1.01607	0.492	0.834431	0.92	1.01989	1.1304	0.819497	1.17028	1.06532	0.295471	0.977303	0.75231
		ARIH2	0.925946	0.000236398	0.622437	0.628	0.670376	1.1e-05	0.894829	0.871604	0.817186	0.821921	1.02638	0.59682	0.831485	1.7615e-08
		ARL1	0.75106	0.988435	1.47019	0.0162	0.997245	0.00022	1.06558	1.45861	2.59878	1.67368	0.90662	0.141472	0.812855	0.00027021
		ARL10	0.700764	1.28e-06	0.942131	0.0211	1.86217	0.76	0.794558	0.900463	0.704982	1.03903	1.03343	0.700509	0.71051	1.84892e-10
		ARL13B	1.6358	0.159396	1.47019	0.000556	1.24011	0.0053	1.30326	1.32534	0.961364	1.15925	1.21439	0.00808527	0.798091	0.00193606
		ARL14EP	1.1274	0.00202345	0.973329	0.367	0.728275	0.86	1.02866	0.885072	1.05369	0.696723	0.91301	0.410037	0.746923	0.000620979
		ARL15	1.16635	0.0537027	0.911301	0.531	0.689415	0.71	1.17508	0.491694	0.412645	0.41048	1.03592	0.841536	0.690806	0.000700279
		ARL16	0.871758	0.79753	1.23285	0.423	1.04992	0.14	0.872812	0.754943	0.655601	0.704363	0.846075	0.0741764	0.815542	0.0203995
		ARL17A	1.61217	0.72657	1.39088	0.123	1.14104	0.29	#VALUE!	#VALUE!	#VALUE!	#VALUE!	1.11488	0.418868	0.829942	0.110445
		ARL2	0.777007	0.0649555	0.846745	0.0972	1.28841	0.28	0.900745	0.891423	1.19688	0.770228	0.863775	0.204857	0.858392	0.162082
		ARL3	1.0519	1.75e-05	1.24229	0.778	1.60006	0.081	0.920086	0.753507	1.19488	0.841598	1.00445	0.976022	1.15992	0.0841063
		ARL4A	1.25266	1.5e-08	1.29774	0.146	1.97773	0.061	0.933731	1.41452	1.46835	1.13155	0.944254	0.777553	0.93773	0.737516
		ARL4C	1.59549	3.98e-09	3.70892	0.0875	3.57529	1.6e-09	0.885359	1.96093	0.464877	0.395632	1.12926	0.247739	1.04049	0.757993
		ARL4D	0.738669	0.484294	1.07029	0.412	1.26873	0.87	0.805961	0.842045	0.374316	0.486886	0.896592	0.500607	2.01069	3.815e-11
		ARL5A	0.977386	0.489392	0.555169	0.914	0.894471	2.1e-06	1.12113	0.688282	1.17799	0.729751	0.983312	0.891233	0.713883	3.35705e-06
		ARL5B	0.532554	0.000146751	0.97942	1.51e-09	0.676093	0.9	1.13848	0.724134	0.821256	1.31235	0.491054	2.07049e-53	0.680027	5.73712e-16
		ARL6	0.866337	0.958279	0.780245	0.642	0.980835	0.34	1.13919	0.645725	1.32289	0.799263	0.996554	0.984529	0.712302	0.000503102
		ARL6IP1	0.992404	1.26e-10	1.11497	0.973	0.478338	0.48	1.19658	0.678736	0.774655	0.7473	0.763861	2.05521e-10	1.20054	2.06328e-05
		ARL6IP5	0.5637	3.8e-10	1.17691	5.31e-07	1.92089	0.2	1.00823	1.63424	4.30035	3.30916	0.577405	8.70922e-30	0.862903	0.0069274
		ARL6IP6	0.770571	0.72405	0.745872	0.0548	0.942521	0.017	1.00269	0.952681	0.733379	1.3679	0.914757	0.348896	0.822705	0.0121458
		ARL8A	1.01607	1.5e-13	1.26225	0.942	2.31227	0.085	0.841902	1.83678	0.882317	1.11572	1.00957	0.944403	0.899605	0.253362
		ARL8B	1.71475	0.690033	1.16797	1.87e-07	1.06017	0.19	1.04421	1.07491	1.93858	1.90498	1.11343	0.0777295	0.812356	0.000123769
		ARMC1	1.2544	0.0651149	0.546768	0.0719	0.804885	9.7e-09	1.01585	0.675937	0.383983	0.281136	1.06552	0.437455	0.850399	0.0126976
		ARMC10	1.01748	2.31e-05	1.04391	0.937	0.591782	0.82	0.959424	1.24905	0.843568	0.507212	0.978777	0.863461	0.732802	2.67988e-05
		ARMC2	0.665726	0.754893	0.607518	0.249	0.882271	0.12	1.01407	0.628152	0.378454	0.430883	0.948389	0.892095	1.21668	0.520205
		ARMC4	4.47225	1.44e-05	3.76591	4.62e-11	2.70552	2.7e-09	1.13462	3.23165	0.884996	1.32678	1.31417	0.16356	0.913464	0.718164
		ARMC5	1.16473	0.00696748	1.13839	0.453	1.50626	0.51	0.934274	1.1012	1.04631	1.89886	0.937725	0.689731	0.793253	0.0494097
		ARMC6	0.827597	0.000737605	0.692075	0.191	0.670899	0.0022	0.864095	0.970983	0.456192	0.551925	0.863116	0.0124702	0.776153	2.57576e-06
		ARMC7	0.922742	0.793999	1.1479	0.757	0.937128	0.52	0.916847	0.75253	0.623425	1.01866	0.903522	0.424692	0.686135	9.44686e-05
		ARMC8	1.11961	0.976278	0.877214	0.43	0.994109	0.31	1.1594	0.913625	1.25026	1.33865	1.20638	0.00575232	0.980247	0.850037
		ARMC9	1.34071	6.87e-10	3.57514	0.0573	2.14192	1.3e-26	1.04045	1.41885	1.89889	1.30098	1.04473	0.724219	1.06659	0.555277
		ARMCX3	1.07998	0.00255782	1.94801	0.62	1.38367	2.8e-11	1.12426	1.35506	1.49554	2.3179	0.838936	0.00834513	0.685021	4.92983e-10
		ARMCX4	0.61132	0.0717658	0.957271	0.0025	0.747194	0.85	0.865982	0.827055	0.641934	0.765107	1.24454	0.268158	1.35471	0.0830177
		ARMCX5	0.966606	0.041568	1.18181	0.904	0.692255	0.42	0.919756	1.04817	1.13083	1.01652	0.903212	0.488999	0.873486	0.307801
		ARMCX6	1.08523	0.985212	1.33237	0.707	0.995139	0.064	0.894042	1.25998	0.702266	0.648542	1.00429	0.984677	0.95594	0.810127
		ARMH3	1.19168	0.177961	0.927231	0.273	0.822453	0.67	1.06752	1.12046	0.75237	1.22903	1.15332	0.0587588	1.03487	0.736504
		ARMH4	1.00347	1.1e-07	2.03355	0.992	2.33094	1.5e-05	1.3146	2.28278	0.765232	0.995949	1.24981	0.318173	0.834733	0.443879
		ARMT1	1.40737	0.0676223	1.07103	0.00391	1.24212	0.65	1.19644	1.0548	0.561271	0.693909	1.014	0.905969	0.857207	0.0384546
		ARNT	1.14631	0.790525	0.866337	0.408	1.05016	0.34	0.728689	0.934668	1.16289	0.999689	1.10653	0.122283	0.865685	0.0167058
		ARNTL	2.08204	0.958432	1.09354	0.00233	1.02132	0.79	1.22444	2.68678	0.884872	0.619424	1.1697	0.339674	1.08629	0.651058
		ARNTL2	1.03455	0.904038	1.38032	0.894	0.970436	0.044	0.741933	2.42979	0.480815	0.709049	1.05309	0.646375	0.797594	0.00508887
		ARPC1A	1.48865	0.0937953	1.48452	0.0164	1.31386	0.01	1.06412	0.970654	0.571379	0.579401	0.845282	0.343334	0.701396	0.0174092
		ARPC2	1.13918	0.263949	1.16716	0.309	1.13963	0.17	1.00869	1.86982	0.901261	1.17448	1.07404	0.16117	0.935353	0.181028
		ARPC3	1.05409	0.412038	1.00556	0.744	1.11379	0.98	1.08872	1.28029	0.903696	0.920814	0.91259	0.109053	0.896399	0.0402657
		ARPC4	0.99103	0.663876	1.13918	0.972	0.91685	0.48	0.803605	1.38542	0.912581	1.11998	0.812476	0.01117	0.853587	0.0609922
		ARPC5	0.918276	0.951698	0.869345	0.584	0.988548	0.28	0.916872	0.934043	0.587778	1.07656	0.964327	0.537618	0.757339	4.00174e-12
		ARPC5L	0.864537	0.33396	0.762072	0.373	0.865474	0.04	0.920481	0.81509	0.751674	0.927341	0.931059	0.363221	1.078	0.308347
		ARPIN	0.850864	0.935702	1.51362	0.45	0.978525	0.0092	0.912782	1.0539	0.587177	0.54253	1.26717	3.21727e-05	0.763167	3.14554e-06
		ARPP19	0.932386	0.0145442	0.868742	0.648	0.766127	0.25	0.793883	0.833255	1.08789	1.40912	0.916846	0.0451114	0.743943	1.09858e-15
		ARRB1	0.745355	0.00183212	0.821311	0.047	1.49282	0.18	0.796247	1.78388	1.1873	1.05044	1.10312	0.540267	0.848772	0.240929
		ARRB2	0.815072	1.18e-15	0.739694	0.173	0.389963	0.02	0.871793	0.528087	0.378132	0.400211	0.897486	0.0222745	1.11084	0.0217141
		ARRDC1	0.79664	0.0241437	1.91057	0.234	1.41912	5.7e-06	0.876382	2.11136	1.50974	1.86245	0.986688	0.924543	1.23943	0.00931239
		ARRDC1-AS1	0.756284	0.519121	0.815637	0.147	0.876275	0.28	1.07372	0.586231	0.550679	0.74491	0.90214	0.285271	0.95208	0.653794
		ARRDC2	1.10957	0.851716	1.31677	0.664	1.04805	0.12	1.02156	0.933836	0.742981	0.890033	0.934436	0.754939	1.27815	0.109656
		ARRDC3	1.25963	7.69e-05	1.32869	0.0658	1.51875	0.011	1.17193	0.749038	1.04252	3.44978	1.13891	0.295442	4.60958	1.77951e-77
		ARRDC4	3.72438	0.308449	3.00424	6.44e-08	1.36443	4.1e-06	1.41761	0.708444	1.99413	1.66342	1.53416	3.24575e-07	1.28118	0.00633884
		ARSA	0.769504	0.740228	1.52732	0.14	1.07182	0.0038	0.929858	2.10302	0.532302	0.757019	0.845286	0.118269	0.611791	5.91252e-08
		ARSB	0.852635	0.000847538	1.18921	0.301	1.48282	0.21	0.969984	1.92357	2.10877	3.01514	0.918373	0.54702	1.03493	0.829394
		ARSK	1.25093	0.901601	1.62789	0.297	0.966081	0.004	1.0046	1.32901	1.48765	0.707789	1.13286	0.34192	0.927941	0.604334
		ARV1	1.1599	2.71e-09	0.765248	0.428	0.44086	0.086	1.04346	0.532592	0.906063	0.731919	1.08702	0.297919	0.77707	9.65522e-05
		ARVCF	1.77031	0.000699631	2.64634	0.000304	1.66302	4.7e-12	0.858709	1.27171	0.885073	2.49819	0.894832	0.272374	0.969441	0.806376
		ASAH1	1.00417	1.77e-08	1.55294	0.984	0.55684	2.4e-05	0.904912	1.09797	2.72542	2.37163	1.1622	0.0529681	1.03545	0.741955
		ASAH2B	1.2201	0.828608	0.920188	0.446	0.937721	0.77	0.949989	0.824105	1.41643	1.63801	1.17978	0.305372	0.749556	0.0448089
		ASAP1	1.04608	5.45e-13	0.621144	0.807	0.45748	2.4e-05	0.961457	0.67885	0.922888	1.10414	1.13336	0.0368448	1.0809	0.231325
		ASAP2	0.948027	0.919523	0.639936	0.819	0.975516	0.0027	0.968234	0.992114	0.778846	0.631406	1.30329	0.0137167	0.936912	0.657388
		ASAP3	0.56175	0.0129497	3.47979	0.00157	1.50233	4.7e-18	0.792091	1.59326	2.32414	1.60716	1.01162	0.955149	1.29162	0.0338206
		ASB1	0.903127	0.191927	0.833353	0.53	1.18734	0.17	0.964216	0.898039	1.40636	2.52087	0.947207	0.593663	0.785236	0.000757878
		ASB13	0.451563	0.00917563	1.73267	1.82e-06	0.64945	0.00045	0.97062	1.00592	1.32208	1.45854	0.820758	0.0253351	0.796639	0.00715147
		ASB3	1.14711	0.0368072	1.36226	0.434	1.33195	0.024	1.12387	0.992069	1.68857	1.1421	0.871975	0.166848	0.98279	0.900675
		ASB6	0.938221	0.155169	0.842647	0.7	1.19065	0.17	0.948452	1.07007	1.22962	1.51888	0.922474	0.342693	1.01636	0.882209
		ASB7	1.17936	0.875003	0.988971	0.369	1.03558	0.96	1.17403	0.839528	0.784282	0.345322	1.08952	0.430002	1.09947	0.35342
		ASB8	0.948027	0.8209	1.05044	0.795	0.956827	0.8	0.965651	0.867017	0.802512	0.724927	1.02713	0.84566	0.932053	0.529937
		ASCC1	1.24574	0.00281681	1.0203	0.0894	1.39229	0.91	1.1802	0.752639	0.875924	0.753267	1.06394	0.556699	0.887723	0.174924
		ASCC2	0.843816	0.00767603	0.975355	0.265	0.718169	0.89	0.857056	1.27409	1.02633	0.927394	0.91043	0.0721674	1.08227	0.128015
		ASCC3	1.03455	0.093386	0.886996	0.844	0.823979	0.35	1.18842	1.83206	1.17642	1.05466	0.908368	0.122556	1.02809	0.723741
		ASF1A	0.812252	0.466528	0.647521	0.158	0.893176	0.00037	0.966645	0.495353	0.817	0.634476	1.00101	0.994631	0.853636	0.109081
		ASF1B	0.647073	1.51e-08	0.353799	0.000171	0.549664	5e-23	1.1336	0.927672	0.189694	0.350418	0.81308	3.58953e-05	0.876542	0.0126552
		ASGR1	1.02883	0.0225175	1.96156	0.955	1.90473	0.017	0.848767	0.56095	2.42974	2.14752	0.807467	0.491223	3.42089	2.68164e-10
		ASH1L	0.65884	0.236022	0.665265	0.00046	0.856707	0.00028	1.10664	0.811833	1.13117	1.23273	0.749833	2.19854e-08	1.04413	0.546071
		ASH2L	0.974004	0.00105981	0.621144	0.875	0.718686	1.2e-06	0.989244	0.78006	0.502151	0.598541	1.1287	0.114503	1.02243	0.833492
		ASIC1	0.597082	0.111777	1.71356	0.15	0.59707	0.076	0.900637	0.774012	1.26098	1.08294	1.06078	0.502422	0.731066	7.15861e-07
		ASL	1.12896	0.39652	1.25701	0.693	1.2375	0.36	0.857124	2.18606	0.774536	2.11625	0.90399	0.658471	0.820554	0.296043
		ASNSD1	0.849685	0.450857	0.82245	0.342	0.882066	0.2	1.18737	0.926542	0.630373	0.624459	0.776429	0.00935044	0.893676	0.317969
		ASPH	1.24143	5.5e-06	1.752	0.063	1.55244	3.7e-09	1.17507	3.22916	2.45869	2.23991	1.18898	0.000613553	0.876343	0.012697
		ASPHD1	1.66324	0.60139	2.05908	0.161	1.23733	0.021	1.31735	3.46348	1.09164	2.91359	1.24309	0.439203	1.20724	0.500082
		ASPHD2	1.30224	0.0474363	2.0806	0.451	1.71263	0.0046	1.00093	1.09233	1.4083	0.43373	0.930852	0.750809	0.871598	0.470213
		ASPM	0.940174	0.00864551	0.405845	0.79	0.672795	9.4e-11	1.30072	0.382244	0.165324	0.428076	0.975639	0.706165	0.820655	1.90709e-06
		ASPSCR1	1.05629	0.947654	1.15029	0.785	0.985726	0.37	0.904905	1.0983	1.36627	1.47206	1.00365	0.977207	0.892755	0.142973
		ASRGL1	0.633317	3.34e-09	0.445964	0.0348	0.331727	2.3e-05	0.886259	0.337982	0.160484	0.547256	0.830318	0.168184	1.11741	0.439847
		ASS1	1.40737	1.83e-89	5.77972	0.0159	9.58097	8.5e-54	0.972385	9.39525	11.3694	0.517726	1.28476	3.16901e-05	1.26696	8.51069e-05
		ASTE1	1.07848	0.956418	0.913198	0.789	0.982916	0.73	1.24279	0.83256	0.474217	0.507582	1.08898	0.66332	0.711946	0.0184587
		ASXL1	0.898132	0.40927	0.789494	0.414	0.903855	0.022	0.98753	0.861648	0.771247	0.909213	1.00244	0.977674	0.970431	0.641777
		ASXL2	0.713507	0.263603	0.684442	0.0136	0.851366	0.0024	1.11241	0.811772	0.558853	0.639111	0.868377	0.0171235	0.731073	3.67246e-09
		ATAD1	1.50525	0.00514727	1.12818	6.32e-05	1.32602	0.31	1.23557	1.05241	0.839059	0.972595	1.03303	0.681969	0.850442	0.00313887
		ATAD2	0.827023	4.18e-17	0.385553	0.12	0.447725	1.4e-23	1.23652	0.565143	0.114076	0.271628	0.948955	0.374502	1.09861	0.0551496
		ATAD2B	1.21419	0.272804	0.781328	0.255	0.838265	0.11	1.07321	0.66537	0.670588	0.746206	1.1195	0.296712	0.897491	0.310454
		ATAD3A	0.817902	0.159784	0.905634	0.269	0.795685	0.61	0.864931	1.27041	0.885346	0.770295	0.925908	0.111728	0.98606	0.831551
		ATAD3B	0.855595	9.46e-05	0.739181	0.372	0.599533	0.032	0.957594	1.50267	1.088	1.24157	0.912433	0.0257895	1.01883	0.739742
		ATAD5	1.1042	0.000700228	0.441964	0.699	0.555861	2e-06	1.17455	0.409167	0.186659	0.427515	1.0802	0.291871	1.18993	0.00333014
		ATAT1	1.24057	2.6e-06	1.12039	0.16	1.76542	0.49	1.03079	0.693573	0.66494	0.594683	0.94834	0.687574	0.793051	0.0128461
		ATCAY	0.992404	7.35e-10	4.58843	0.991	6.24822	7.3e-07	1.31299	2.45566	2.09142	#VALUE!	0.922755	0.889763	18.4322	2.20149e-29
		ATE1	0.91067	0.573881	0.870551	0.616	0.908761	0.38	1.03328	1.12839	0.978258	1.14867	1.18738	0.0335135	1.00968	0.940441
		ATF1	0.815637	0.654547	0.803294	0.264	0.914946	0.18	1.07237	0.919871	0.413847	0.679819	0.812808	0.00615567	0.901012	0.220153
		ATF2	1.28521	0.651287	1.09202	0.0411	1.06929	0.53	1.05218	0.945082	1.09049	1.05308	1.06185	0.51969	0.791113	0.000608649
		ATF3	3.17774	0.00160424	1.87905	8.48e-16	1.61456	1.9e-05	1.22778	1.15991	4.26349	13.1825	0.488585	9.96659e-75	1.72881	9.43464e-49
		ATF4	1.28699	0.47884	1.14393	0.0234	0.913844	0.24	1.00067	0.991049	1.21479	0.817901	0.934192	0.00849515	1.14048	8.55625e-09
		ATF5	1.18099	1.55e-08	0.825305	0.188	0.571305	0.093	1.00378	0.497904	0.663285	0.33137	0.828874	0.130312	1.5744	4.32317e-06
		ATF6	1.7219	0.0690003	0.713013	1.01e-07	0.816048	0.0012	1.08076	1.0297	1.17778	0.813658	0.946827	0.502207	0.99937	0.996035
		ATF6B	0.934975	0.706193	1.0203	0.73	0.934041	0.92	0.921257	0.886585	0.771389	0.699103	1.03139	0.743763	0.734076	2.4256e-07
		ATF7	1.11342	0.0182125	0.890693	0.547	0.728863	0.48	1.08115	1.14806	0.9664	1.32781	0.85342	0.216414	0.957682	0.787951
		ATF7IP	0.862741	0.286222	0.7285	0.406	0.84502	0.024	1.11807	0.695928	0.819727	0.851924	0.947126	0.504445	1.19706	0.00239861
		ATF7IP2	1.30315	0.00172556	0.837406	0.209	0.571609	0.42	1.05692	0.413694	0.608961	0.388076	1.09672	0.662522	0.989032	0.965935
		ATG10	1.05263	0.00771058	0.925304	0.841	0.647781	0.73	1.3319	0.874701	0.852561	0.615154	1.30947	0.178406	1.01172	0.969396
		ATG101	0.886382	0.941336	1.19168	0.697	1.02658	0.51	0.773218	1.30684	1.24333	1.59695	0.794621	0.0662045	1.03992	0.821458
		ATG12	0.691116	0.367786	1.12194	0.00292	1.13398	0.42	1.03021	1.24193	1.07746	1.21412	0.837739	0.0133622	0.846015	0.0185151
		ATG13	1.45498	0.0639288	1.3333	4.82e-05	1.19618	0.0014	0.999717	1.19553	1.60656	1.26069	0.93143	0.292646	0.994105	0.949066
		ATG14	0.902501	0.0547616	1.23799	0.611	1.32541	0.17	1.06643	0.887253	0.800137	0.76757	0.95054	0.75947	0.970208	0.85957
		ATG16L1	1.39378	0.111038	0.952638	0.00875	0.814863	0.78	1.15378	0.979572	0.7922	0.58796	0.942922	0.580391	0.785832	0.00151317
		ATG16L2	0.763659	0.965601	1.04247	0.414	1.01909	0.92	1.09524	1.40481	0.743434	0.615541	1.16761	0.150736	0.872445	0.214679
		ATG2A	0.94737	0.782573	0.849096	0.776	1.05048	0.25	0.929048	0.961045	0.986239	1.31664	0.94231	0.437067	1.51364	1.04794e-15
		ATG2B	1.14472	0.910353	0.941478	0.37	1.02166	0.71	1.17144	0.834477	0.812187	0.820236	1.07131	0.30938	0.782555	3.80249e-06
		ATG3	0.942785	0.580725	0.991717	0.718	0.923986	0.96	0.768275	1.1196	0.8292	0.810432	0.983255	0.866548	1.02885	0.748105
		ATG4A	0.862741	0.0996918	1.06069	0.605	1.41367	0.84	1.04424	1.39004	1.33283	1.26401	0.959357	0.76433	0.955569	0.728175
		ATG4B	1.06437	0.746363	1.1487	0.715	0.948336	0.3	0.948644	1.15094	0.844882	0.790846	0.951267	0.459624	0.901484	0.0590951
		ATG4C	0.99516	2.45e-05	0.497925	0.985	0.546269	1.3e-06	1.08459	0.600231	0.540929	0.410726	1.10181	0.255742	0.788307	0.000784117
		ATG4D	0.915099	5.43e-13	0.657471	0.656	0.391047	0.0024	1.04249	0.928115	0.638837	0.724952	0.773196	0.00250244	0.945431	0.623377
		ATG5	0.999307	0.937493	0.935623	0.997	0.982357	0.72	0.970083	0.664411	0.629339	0.746677	0.993163	0.961313	0.934447	0.51114
		ATG7	0.967947	0.396689	0.801625	0.875	1.14066	0.12	0.956566	1.38224	0.685068	0.553902	0.887091	0.215967	0.989273	0.937575
		ATG9A	0.940826	0.885827	0.575944	0.776	0.969114	4.8e-05	1.11593	1.34053	0.884603	1.15255	1.01407	0.908554	0.874546	0.0937211
		ATIC	1.02243	1.02e-11	0.698339	0.885	0.552727	8e-05	0.895665	0.848293	0.422716	0.284231	1.07805	0.0959748	0.896062	0.00726279
		ATL1	0.894405	0.00673252	1.12272	0.573	1.45878	0.52	1.25919	1.82654	0.520799	0.884978	1.01394	0.965158	1.34989	0.116225
		ATL2	1.17365	0.184953	0.718968	0.189	0.859941	0.0011	1.05157	0.827149	0.950003	0.990417	0.936646	0.307114	0.837327	0.000513475
		ATL3	1.428	0.00498561	1.54114	0.000893	1.33511	1e-05	1.56203	2.0163	1.6395	1.23802	1.28476	0.00100037	1.14416	0.111689
		ATM	0.96393	0.460431	0.93368	0.854	0.891961	0.69	1.24698	1.13215	1.0965	0.854092	1.02917	0.703777	0.725611	1.2068e-11
		ATMIN	0.739694	0.00077203	0.945402	0.0106	0.699108	0.71	0.95086	1.11281	1.04043	0.834416	0.899134	0.134907	0.919768	0.250134
		ATN1	0.824734	0.761851	0.840314	0.118	0.955256	0.13	0.828935	1.06532	1.01847	1.10651	0.815776	5.98861e-08	1.01346	0.828079
		ATOX1	1.03311	8.36e-11	1.56917	0.89	2.31518	0.0012	1.11462	1.68294	1.20783	0.858039	0.924287	0.560165	1.00222	0.990527
		ATP10D	1.5305	2.76e-07	1.32042	0.00081	1.79661	0.029	1.43782	2.29916	2.03528	2.17963	1.35821	0.0272444	0.777287	0.089751
		ATP11A	1.41716	0.00173297	1.60214	0.125	1.8027	0.017	0.992629	1.49587	3.18686	2.9992	1.17459	0.0172614	1.00069	0.996035
		ATP11B	0.905006	0.0878043	0.833353	0.531	0.80765	0.16	1.15065	1.06568	0.6948	2.2635	0.980683	0.862105	0.768171	7.69252e-05
		ATP11C	0.522318	0.00275662	0.559806	3.28e-08	0.700039	3.3e-07	1.02372	0.600702	0.732319	0.808245	1.05648	0.491223	0.788046	3.58049e-05
		ATP13A1	1.04247	0.21543	1.05482	0.798	0.864279	0.71	0.903996	0.941814	1.16812	0.926202	1.039	0.539159	1.10001	0.0467799
		ATP13A2	0.90125	0.0914001	1.86219	0.626	1.31155	1.3e-05	0.996197	1.57936	1.82692	1.11308	1.09124	0.184412	1.1593	0.00881096
		ATP13A3	1.17528	0.514217	0.623301	0.2	0.916739	2.1e-06	1.2337	1.45564	1.0499	1.83565	0.980084	0.795927	0.826556	6.2937e-05
		ATP1A1	0.957271	1.17e-18	0.330106	0.805	0.404866	1.4e-27	1.05978	0.638081	0.553104	0.413066	1.09056	0.00439002	0.983971	0.70615
		ATP1A1-AS1	0.896267	1.11e-10	0.271684	0.689	0.315859	9.2e-13	1.09584	0.515235	0.57502	0.47462	0.847347	0.534403	1.04811	0.880245
		ATP1B1	1.22095	0.242683	1.95477	0.215	1.19336	5.2e-08	0.560297	2.17461	0.799173	4.90127	0.878767	0.288863	0.801646	0.0361463
		ATP1B3	1.46713	0.337173	0.708088	0.000605	0.884098	0.0012	0.983323	1.56757	1.85671	0.842143	0.997943	0.977897	0.822736	3.56548e-07
		ATP23	0.902501	0.159411	0.823591	0.733	0.732042	0.43	1.02036	0.733964	1.21445	1.15187	0.959781	0.883194	1.13886	0.563294
		ATP2A2	0.681129	0.645624	0.742776	0.000161	1.06366	0.0026	0.973695	0.970983	0.717692	0.821213	0.792671	2.83891e-17	0.829746	2.67566e-11
		ATP2B1	0.83047	4.03e-27	1.64947	0.156	2.895	1.4e-06	1.04709	2.22147	1.89353	2.45555	0.842574	0.000475402	0.596047	4.21161e-30
		ATP2B4	0.859756	1.17e-33	1.80375	0.244	3.06184	1.1e-09	0.916929	2.86129	1.20605	1.04217	1.15071	0.0656337	0.87634	0.0854258
		ATP2C1	1.07773	0.022565	0.934327	0.598	1.26535	0.61	0.977341	1.12733	1.18323	0.866816	1.13675	0.0243702	0.754876	4.53373e-08
		ATP5F1A	0.480297	0.000684839	0.76897	1.18e-15	0.724883	0.0071	1.0196	0.792352	0.982351	0.886508	0.645824	4.38624e-44	0.938569	0.10208
		ATP5F1B	0.941478	0.00405603	0.670821	0.662	0.762475	9.7e-06	0.973939	0.851628	0.86841	0.534843	0.979802	0.668374	1.17987	3.02317e-08
		ATP5F1C	1.09505	0.738653	0.774856	0.474	1.0459	0.0079	1.04395	0.894279	0.878414	0.530783	0.976956	0.730375	1.02787	0.65876
		ATP5F1D	0.752102	0.473412	1.04247	0.0707	0.883383	0.84	0.863171	0.885567	0.928594	0.763575	0.916346	0.165099	1.07455	0.249583
		ATP5F1E	1.12117	0.0215552	1.16878	0.441	1.30238	0.22	1.17772	0.967892	1.01911	1.02836	0.94347	0.376907	1.04824	0.472797
		ATP5IF1	0.736624	0.0941525	1.09051	0.00803	0.82534	0.52	0.992553	0.739221	0.48659	0.340833	0.889276	0.0449613	1.03645	0.623801
		ATP5MC1	0.918913	5.76e-18	0.850864	0.583	0.413057	0.19	0.895285	0.405766	0.361548	0.22116	0.978094	0.789742	0.884531	0.0265915
		ATP5MC2	0.946714	0.0032152	0.836246	0.697	0.754657	0.083	0.916977	0.624	0.44781	0.371386	0.958791	0.399254	1.05168	0.265545
		ATP5MC3	0.855595	0.0644003	0.789494	0.212	0.817345	0.026	0.8733	0.732069	0.704853	0.519881	0.9015	0.0228268	0.939163	0.198282
		ATP5MD	1.03814	0.0232721	1.07252	0.826	1.28596	0.63	0.980001	1.02868	0.887702	0.69247	0.89078	0.152342	1.09856	0.242877
		ATP5MF	1.05044	0.876409	1.03526	0.812	0.96857	0.86	0.990563	0.879682	0.675159	0.658017	0.773303	0.0479776	0.95277	0.785251
		ATP5MG	1.04826	0.0721779	0.900626	0.829	0.768901	0.56	0.972437	0.767077	0.348965	0.367943	0.995776	0.986294	0.985414	0.950949
		ATP5MPL	1.06437	0.0476791	0.974004	0.72	0.78291	0.88	1.01771	0.642134	0.849037	0.609015	0.897878	0.135589	1.06641	0.407008
		ATP5PB	0.907519	0.00235023	0.65884	0.466	0.740731	1.2e-05	0.987743	0.798481	1.12611	0.754147	0.919968	0.0372923	1.01929	0.720626
		ATP5PD	1.1042	0.197189	1.18838	0.477	1.16253	0.13	0.976983	0.751384	0.899827	0.611215	0.970861	0.838422	1.03809	0.779864
		ATP5PF	1.01045	0.639237	1.01466	0.961	1.07613	0.94	0.994515	0.826854	0.962109	0.626172	0.917456	0.309299	0.984641	0.889613
		ATP5PO	1.24574	0.962285	1.04972	0.294	1.01421	0.85	1.03964	0.72604	0.779913	0.652132	0.821628	0.245789	0.961396	0.857788
		ATP6	1.24229	0.0175051	1.17691	0.068	0.776126	0.16	0.986408	1.25129	0.819802	0.74822	0.965647	0.331246	0.879396	1.47231e-06
		ATP6AP1	1.03742	0.170761	1.46104	0.822	1.16862	0.00013	0.865627	1.30033	2.64594	2.33497	0.962404	0.442941	1.28573	1.76278e-13
		ATP6AP2	1.51257	0.0175816	1.37936	0.000379	0.758689	0.0044	0.997781	1.31634	1.06512	1.07384	1.11379	0.0430363	0.896957	0.0386953
		ATP6V0A1	1.13997	0.368448	1.2544	0.31	0.8947	0.033	1.05739	0.797647	0.760534	1.44087	0.924873	0.101401	1.12473	0.00521277
		ATP6V0A2	1.03383	0.00109904	0.87904	0.859	0.6862	0.36	0.996904	0.742086	1.63147	1.94779	0.914772	0.145763	0.803291	1.90713e-05
		ATP6V0B	0.91764	0.536892	1	0.646	1.10879	1	0.909754	0.882709	0.825965	0.656599	0.835705	3.00448e-05	1.42094	2.10392e-19
		ATP6V0D1	1.21504	0.781963	1.70527	0.188	0.951308	5.2e-06	1.05863	1.51843	1.47462	2.18361	1.06654	0.314228	1.06123	0.343224
		ATP6V0E1	1.40444	6.37e-10	1.11034	0.00233	1.82802	0.42	0.796473	1.23015	1.36966	1.22201	1.37212	3.02061e-06	0.927311	0.409378
		ATP6V0E2	0.687771	0.528355	0.96393	0.0102	0.897764	0.85	0.927877	0.4171	0.504421	0.324401	0.999274	0.994294	0.93495	0.310481
		ATP6V1A	1.12117	0.481057	1.28343	0.469	1.1111	0.044	1.12799	1.11242	0.710625	1.10974	1.19566	4.51674e-06	0.770963	1.47991e-11
		ATP6V1B2	1.41323	0.920599	1.00556	0.0013	0.983021	0.97	1.05944	1.28868	0.827489	0.770618	1.06659	0.385597	1.0049	0.961214
		ATP6V1C1	0.93174	1.67e-07	1.20664	0.699	0.542823	0.17	1.09062	0.829905	0.691058	0.933544	0.720688	1.22051e-09	0.763379	8.90397e-07
		ATP6V1D	1.02811	0.738605	0.956608	0.882	1.05515	0.79	1.23633	1.52125	0.509562	0.444866	0.907348	0.258359	0.756934	5.20612e-05
		ATP6V1E1	1.00347	2.29e-05	1.02883	0.984	1.49676	0.85	1.0054	1.34604	0.859982	0.859955	0.85644	0.00265791	0.927578	0.195211
		ATP6V1E2	0.846745	0.474877	0.86814	0.651	0.796208	0.69	1.23153	1.04475	0.773877	0.418795	0.938652	0.837175	1.12588	0.653236
		ATP6V1F	0.859756	0.554321	1.25788	0.374	1.10528	0.11	0.934388	1.05897	0.76137	0.714977	0.886955	0.111195	1.01687	0.874433
		ATP6V1G1	0.961927	0.296215	1.23713	0.811	1.13377	0.049	0.838184	0.972503	1.4052	1.28141	0.857549	0.00269898	1.17814	0.000777286
		ATP6V1H	1.18591	0.0524376	1.39571	0.206	1.25464	0.0025	1.07934	1.24694	0.931089	1.09056	0.968879	0.762211	1.18013	0.0165627
		ATP7A	0.607097	0.033292	0.583984	0.013	0.666918	0.0036	1.09572	0.556186	1.03454	0.858529	0.813716	0.0534559	0.894516	0.351342
		ATP7B	0.804408	0.000978939	2.0691	0.473	1.99351	0.00053	0.921835	1.65783	1.6554	0.917863	1.09137	0.289666	0.777238	0.000172195
		ATP8	1.1599	0.382192	1	0.389	0.868784	1	0.981574	1.30015	0.81558	0.743268	0.961357	0.785989	0.76398	0.00472072
		ATP8B2	0.774319	6.28e-08	2.53327	0.0538	1.7912	6.2e-19	0.948571	2.53866	2.35908	1.60698	0.831591	1.0992e-06	0.782232	2.99907e-11
		ATP9A	0.81169	1.17e-05	1.38319	0.142	1.64941	0.0072	1.16165	2.66703	0.691867	1.3663	1.2522	0.000878342	1.05276	0.574414
		ATP9B	1.02243	0.961138	1.11884	0.928	0.98786	0.54	0.982924	1.1329	1.19044	1.3684	1.03267	0.88398	1.53074	0.000971843
		ATPAF1	0.91067	4.45e-07	0.880259	0.563	0.571379	0.36	0.637865	0.642281	1.19553	0.81541	1.06781	0.225826	0.88658	0.00880333
		ATPAF2	0.64977	0.571032	1.09885	0.0262	0.881463	0.69	0.804694	0.626153	0.804371	0.888353	0.846508	0.179304	1.0274	0.872548
		ATPSCKMT	1.20664	0.162438	0.731029	0.254	0.811491	0.027	1.06179	0.982858	0.258699	0.393319	1.29305	0.0509933	0.724166	0.0123883
		ATR	0.802181	7.96e-07	0.814508	0.152	0.543366	0.15	1.11839	0.981738	1.07982	0.621649	1.07816	0.311114	0.968311	0.712424
		ATRAID	1.22688	0.891172	0.984866	0.109	1.02427	0.93	1.02217	0.828063	0.61207	0.642272	1.21755	0.0120294	0.916794	0.355839
		ATRIP	0.699793	0.0174602	0.724973	0.112	0.625735	0.13	0.935521	1.21184	0.495253	0.419027	0.933659	0.43245	1.40164	3.02677e-08
		ATRN	1.01045	0.86971	1.00905	0.956	1.02824	0.96	0.998006	1.0609	1.53398	1.3568	1.22294	0.000118636	1.00614	0.946467
		ATRNL1	3.45815	0.590491	2.98763	4.6e-07	1.20441	4.8e-06	1.17193	2.00167	0.372776	1.22846	1.38127	0.0488873	0.821523	0.296368
		ATRX	1.52203	0.52842	1.18509	1.71e-05	1.08196	0.11	1.1939	0.709928	0.912636	0.9062	1.3162	1.43141e-10	0.980394	0.777562
		ATXN1	0.948027	6.99e-23	2.23457	0.756	2.64764	1.3e-15	1.03901	3.78365	2.32244	11.6823	0.813446	0.00965798	0.811918	0.00797361
		ATXN10	1.03383	0.743958	0.929161	0.836	0.954037	0.58	1.10977	0.782227	0.693125	0.846104	1.02231	0.753991	0.990265	0.897176
		ATXN1L	1.05848	0.0136957	0.948027	0.739	1.32677	0.74	0.99673	0.745404	0.920889	1.41172	1.09457	0.313875	0.963846	0.726187
		ATXN2	0.951318	0.272497	1.03025	0.792	0.856797	0.87	0.946113	1.29569	0.917039	1.21759	0.924543	0.253631	0.899348	0.0854757
		ATXN2L	0.888843	7.12e-15	0.72951	0.314	0.515032	0.00051	0.943308	0.979514	0.971346	0.916722	0.877398	0.000197581	0.949563	0.203522
		ATXN3	0.932386	0.00260116	1.39185	0.736	1.4953	0.018	0.971878	0.855312	1.00795	1.33695	0.84368	0.0930147	0.878264	0.213805
		ATXN7	0.852044	0.21875	0.895646	0.452	1.24529	0.6	1.09029	1.32615	1.1032	1.79688	0.822565	0.00798128	1.1107	0.189102
		ATXN7L1	1.00139	3.21e-09	0.554785	0.994	0.484489	2.6e-06	0.975554	0.378239	0.486734	0.78154	0.975351	0.910832	0.78318	0.0991639
		ATXN7L2	1.06955	0.720582	0.96929	0.759	1.07474	0.89	0.955267	0.827595	0.854445	1.38285	1.07602	0.573353	1.14773	0.195731
		ATXN7L3	0.790041	0.0891201	0.934975	0.107	1.25483	0.7	0.910086	1.07832	0.809515	0.986397	0.991273	0.911334	0.816437	6.83627e-06
		ATXN7L3B	1.03025	0.0411585	0.845572	0.855	0.80531	0.13	0.935438	0.790255	0.907592	0.797952	0.949469	0.348796	0.687433	2.25125e-20
		AUH	0.753145	0.585085	1.09657	0.213	1.13976	0.72	1.39156	1.2517	1.18126	0.764771	0.82116	0.131482	1.01672	0.930645
		AUNIP	1.10496	6.94e-08	0.573554	0.663	0.435597	0.0005	1.075	0.654889	0.236692	0.304946	0.909993	0.393782	0.714159	7.11541e-05
		AUP1	1.1042	0.325824	1.00278	0.506	0.880816	0.99	0.966515	1.0815	1.06002	1.00801	0.882419	0.00439272	1.02768	0.643182
		AURKA	0.631564	3.21e-12	0.461691	1.09e-05	0.511111	1.1e-15	0.959374	0.644864	0.40894	0.351032	0.711388	1.88965e-14	1.08321	0.134918
		AURKAIP1	0.807761	0.7813	1.04464	0.179	1.0552	0.82	0.859943	1.02052	0.812017	0.788759	0.870184	0.00473002	0.855329	0.000989128
		AURKB	0.810003	1.02e-12	0.445038	0.0611	0.520349	1.1e-18	0.940407	0.514339	0.0955402	0.171857	0.77506	5.67623e-09	0.660186	1.80233e-22
		AUTS2	1.43197	0.00403124	1.85575	0.0109	1.45089	4.2e-07	0.745316	0.706676	1.02159	1.31951	0.914745	0.157799	0.584692	1.02304e-26
		AVEN	1.00835	0.0323017	1.19748	0.973	1.33859	0.23	1.02039	1.75192	0.909155	1.19202	1.11161	0.481256	0.953077	0.777404
		AVIL	1.03311	8.35e-07	1.76296	0.93	2.5926	0.0071	1.20376	1.12166	7.39035	5.28321	0.932532	0.827459	1.38095	0.135058
		AVL9	1.29325	0.21875	0.840314	0.0274	0.862881	0.14	1.13064	0.711926	1.26604	0.9326	1.14329	0.0418743	0.793653	0.000132393
		AVPI1	1.97383	0.146944	2.29104	0.00353	1.425	9e-05	1.1727	1.63354	0.820178	8.0626	0.98055	0.945245	0.800144	0.249532
		AXIN1	1.11806	0.532564	1.08073	0.558	0.895134	0.68	0.869641	1.22164	0.860805	0.957949	0.934688	0.383335	1.07491	0.318106
		AXIN2	1.40737	0.124926	0.621144	0.216	0.674153	0.061	0.884099	0.367964	0.594747	0.908939	1.29674	0.0591589	1.07749	0.680925
		AZI2	0.752102	0.31444	0.786217	0.0901	0.842601	0.13	1.03322	0.730104	0.78164	0.974545	0.949316	0.731171	0.989188	0.948943
		AZIN1	0.899378	0.0371677	0.91067	0.433	0.800833	0.46	1.08462	1.64669	0.73788	1.20666	0.86015	0.000337654	0.932724	0.14085
		AZIN2	1.1607	1.12e-09	3.40345	0.678	3.62122	1.2e-08	1.10197	0.944703	1.72473	0.775043	1.31995	0.0506502	1.57403	0.000318644
		B2M	1.26839	0.494365	1.03742	0.0225	1.08534	0.79	1.11165	1.19001	0.778803	0.720923	0.98256	0.814923	1.27234	2.15952e-08
		B3GALNT2	1.1088	0.0271591	1.55509	0.684	0.668553	0.011	0.961351	1.07607	0.946367	1.00435	0.863684	0.0464927	0.891529	0.128101
		B3GALT6	0.901875	0.108429	1.10038	0.578	1.25834	0.58	0.780011	1.39102	1.09812	0.863351	0.902699	0.166566	0.774721	3.22538e-05
		B3GAT3	0.942131	0.885349	1.074	0.72	0.974847	0.63	0.940024	1.08689	0.900318	0.715282	0.914956	0.23403	0.975876	0.794252
		B3GLCT	1.07699	0.706984	1.47734	0.714	1.0738	0.0038	1.01816	1.56621	1.7173	2.43751	1.06316	0.639244	0.656472	2.6131e-06
		B3GNT2	1.16151	0.0150469	1.59218	0.512	1.50325	0.0049	1.00802	2.15445	1.664	1.51908	0.950994	0.755581	0.784508	0.0310167
		B3GNT5	1.00975	0.701702	0.634196	0.965	1.06893	0.00027	1.13919	0.841232	0.576943	0.4046	0.873784	0.432534	0.752874	0.0456921
		B3GNT9	0.805524	0.0172201	1.3463	0.221	1.41363	0.047	0.925645	1.33849	1.11736	2.13302	0.982096	0.970579	2.82018	1.81333e-05
		B3GNTL1	0.812816	0.23032	0.904379	0.553	0.708003	0.78	1.14316	0.594252	0.488193	0.625677	1.05839	0.849681	1.17293	0.499949
		B4GALNT1	0.517991	0.327483	0.617281	5.88e-06	1.17716	0.00066	0.754993	1.63614	0.91736	0.604927	0.667448	0.00141536	0.742801	0.0234093
		B4GALNT3	0.862741	0.974268	1.10496	0.37	0.992432	0.54	0.836446	1.37066	1.48539	0.943531	0.961093	0.714408	0.859322	0.0511642
		B4GALNT4	0.950659	9.58e-05	4.08405	0.844	1.78694	1.6e-24	0.906566	1.25287	2.08989	1.20189	1.27618	0.00124576	1.14406	0.10697
		B4GALT1	1.06142	0.00283043	1.68763	0.703	1.36713	1.3e-07	0.971849	2.48016	0.962601	1.73976	1.0397	0.715151	0.774799	0.000329359
		B4GALT2	0.674551	0.000142078	0.961261	0.00387	0.623746	0.84	0.887512	1.21959	1.00614	0.739391	0.900138	0.068847	1.04284	0.540956
		B4GALT3	0.924023	0.981494	0.720465	0.616	0.995522	0.0033	0.98357	0.901735	1.01184	0.826104	0.950967	0.477671	1.01817	0.826821
		B4GALT4	0.942131	0.626393	2.17498	0.821	0.897693	3e-07	0.886508	2.20292	2.40114	2.40506	0.964952	0.83097	0.959963	0.795141
		B4GALT5	1.21083	2.19e-17	0.856782	0.104	0.451492	0.17	0.963677	0.648733	0.92634	0.514243	0.904676	0.0955295	0.695287	3.28738e-13
		B4GALT7	0.638164	0.78763	0.906262	0.0517	1.08084	0.73	0.901928	1.21557	0.70368	0.958111	0.938991	0.611536	0.942586	0.620965
		B4GAT1	0.74898	0.00342373	1.25266	0.0128	1.35939	0.042	0.948268	0.559705	1.34738	0.917455	0.938477	0.363895	0.742877	9.20457e-09
		B9D1	0.692075	0.629082	1.36037	0.0337	1.10235	0.052	0.941866	0.596029	0.720806	0.589595	1.01024	0.94373	0.978632	0.871079
		B9D2	0.781328	0.943834	1.00417	0.451	0.971427	0.99	0.919983	0.774719	0.665451	0.601258	0.723819	0.297681	1.15225	0.684642
		BABAM1	0.989657	0.818008	0.99654	0.969	1.0512	0.99	0.975401	0.658438	0.784465	0.685857	1.0418	0.818265	1.05439	0.745454
		BABAM2	1.10343	0.244654	1.5252	0.672	1.2337	0.0079	0.966044	1.35648	1.58719	0.992543	1.09127	0.470009	1.05402	0.685291
		BACE1	0.832776	0.11495	1.07549	0.283	1.25854	0.7	0.936512	2.22135	1.83134	3.69842	0.803943	0.152201	0.821053	0.188584
		BACH1	0.816203	0.00080936	1.30405	0.112	1.42867	0.018	0.819597	1.50801	1.20274	2.92153	0.686178	4.23204e-07	0.823406	0.0158828
		BACH2	2.12874	0.000162793	9.03798	0.055	3.4082	3.2e-13	1.06769	2.78288	2.48356	5.96783	0.847535	0.349073	1.02244	0.924656
		BAD	0.895025	0.00761791	1.86995	0.7	1.65824	0.0007	0.937492	1.41462	1.45072	1.63324	0.837946	0.544313	1.21559	0.461162
		BAG1	1.11574	0.956418	1.50943	0.558	1.01289	0.002	0.898698	1.42702	1.22549	0.888314	1.02957	0.754444	1.02283	0.809844
		BAG2	0.664804	3.79e-07	0.73255	0.00103	0.565404	0.0099	1.01929	1.23657	0.461922	2.0909	0.928382	0.540315	0.910885	0.400165
		BAG3	0.727995	0.412419	0.976709	0.00726	1.11595	0.89	0.910535	1.7847	1.01919	0.704103	0.783317	7.49961e-06	1.19831	0.000950285
		BAG4	1.12194	0.0790441	0.949342	0.479	0.795447	0.77	1.18238	0.877182	0.775322	0.593234	1.10071	0.292646	0.729309	1.49267e-05
		BAG5	0.99654	0.0360464	0.79996	0.986	0.775102	0.074	1.11189	0.90666	0.73515	0.564242	0.95188	0.556617	0.873411	0.0350832
		BAG6	0.952638	0.636366	0.989657	0.733	1.06173	0.95	0.905768	0.894072	0.815373	0.730257	0.851967	1.73444e-06	1.02604	0.582523
		BAHCC1	1.10496	0.91015	0.743807	0.55	1.02248	0.018	0.926198	0.635446	0.931654	0.715389	1.18868	0.00176239	0.904892	0.100092
		BAHD1	0.731536	0.000449033	0.989657	0.0209	0.656778	0.96	1.05327	1.1792	1.03959	1.17065	0.887854	0.149083	0.836848	0.0162667
		BAIAP2	0.993092	0.629368	1.40834	0.976	1.08235	0.0052	0.935156	1.3536	0.799019	1.66392	0.926004	0.539159	1.2932	0.00425471
		BAIAP2-DT	0.568408	0.160834	1.50108	0.000352	1.25481	0.0056	0.819363	0.459923	0.634584	0.798335	1.04902	0.778601	0.801569	0.065831
		BAIAP2L2	0.573951	0.915427	0.498961	0.0162	0.964825	0.00096	0.8022	3.69142	0.730194	1.33101	1.41114	0.0239036	2.28317	1.51745e-10
		BAK1	1.07848	0.255417	1.28521	0.766	1.24028	0.17	0.914763	1.45466	0.98714	0.739258	0.879845	0.128549	0.913881	0.308306
		BAMBI	1.25614	0.0285437	0.85441	0.082	1.29488	0.23	1.0033	0.960465	0.911668	1.42643	1.0772	0.702418	0.839621	0.270159
		BANF1	0.821311	0.422471	0.90125	0.157	0.891024	0.48	0.939802	0.96764	0.576875	0.609764	0.881908	0.00509628	1.00703	0.92364
		BANP	0.722966	0.679703	0.885154	0.0428	1.08245	0.49	0.845182	0.84935	1.17272	0.990615	0.748855	0.000872483	1.05538	0.650612
		BAP1	0.907519	0.934573	0.911301	0.566	1.0169	0.56	0.914592	0.949312	0.885902	0.927564	1.02018	0.701253	0.800154	7.10851e-12
		BARD1	0.866938	1.76e-05	0.667112	0.459	0.547795	0.006	1.09358	0.907912	0.199932	0.7329	1.02334	0.864485	0.80116	0.00894869
		BARHL2	0.55594	2.43e-25	0.301243	8.58e-08	0.345528	2.6e-31	0.666612	0.0771357	0.292869	0.0854058	1.09409	0.737355	0.895178	0.660594
		BARX1	1.08147	0.000187047	0.97942	0.717	0.587186	0.93	0.888466	0.704767	0.582355	1.27203	1.23881	0.312301	1.12922	0.604006
		BARX2	1.32042	9.23e-17	0.790041	0.0183	0.432063	0.038	0.927771	0.392024	0.480747	0.452108	1.04538	0.866367	0.790576	0.209112
		BASP1	0.831046	2.32e-05	0.596254	0.101	0.67369	1.5e-08	0.789336	0.509083	0.455723	0.647441	1.30427	0.0450088	1.64837	1.42721e-05
		BATF3	1.21083	0.00153698	1.21251	0.543	1.99846	0.51	1.05809	1.65231	1.80988	1.67322	1.06496	0.743008	0.679064	0.00326627
		BAX	0.927231	0.638637	1.00835	0.703	0.919467	0.97	0.832465	1.03867	0.642688	0.646562	0.92402	0.124039	1.07311	0.160562
		BAZ1A	0.856188	8.68e-08	0.559806	0.23	0.586189	6e-09	1.12995	0.813778	0.4978	0.406594	0.893613	0.0138477	0.819463	1.65208e-06
		BAZ1B	0.883928	1.46e-07	0.734584	0.269	0.640533	0.00046	0.960305	0.887317	0.850049	0.947551	0.988059	0.818491	0.9541	0.210972
		BAZ2A	0.782412	0.0811732	0.695923	0.0492	0.813877	0.00086	0.965109	0.712398	0.932892	0.783818	0.968247	0.526051	0.779851	4.30983e-13
		BAZ2B	1.08598	0.147384	1.01185	0.671	1.23537	0.96	#VALUE!	#VALUE!	#VALUE!	#VALUE!	1.03015	0.868033	0.943408	0.710704
		BBC3	3.25352	0.000663606	3.57266	0.000109	2.71271	7.8e-06	0.924221	1.29222	1.99944	0.931208	0.918221	0.390851	1.29905	0.000417585
		BBIP1	1.21083	0.0188011	0.859161	0.316	1.43315	0.42	1.14643	1.15592	1.25468	1.27456	1.13181	0.43277	0.789166	0.0787621
		BBOF1	1.37173	0.00063199	2.23303	0.424	2.61967	0.0063	1.67819	2.14321	3.14703	1.55237	1.19172	0.564525	1.34009	0.251918
		BBS10	1.11574	0.0323592	1.25788	0.653	1.4472	0.23	1.03275	0.976006	0.922511	0.441512	0.996005	0.982727	0.738322	0.00212443
		BBS12	1.19416	0.000831489	2.16295	0.582	2.06753	0.00039	1.29329	1.18144	1.58599	1.1027	1.0053	0.987204	0.701753	0.0892479
		BBS2	1.42306	3.91e-08	1.49174	0.0105	1.91131	0.0014	1.26324	1.06556	0.98207	1.0821	1.37105	1.20643e-06	0.818466	0.00520674
		BBS4	1.01396	0.698437	0.706617	0.951	1.07353	0.011	0.897614	0.563236	0.612632	1.0159	1.04168	0.714408	0.915124	0.334738
		BBS5	0.916369	0.0641031	1.31677	0.768	0.681748	0.2	1.04532	0.815382	1.03315	0.806578	1.01601	0.950233	0.88677	0.536203
		BBS7	1.17446	0.370895	0.999307	0.284	1.13788	1	0.882813	1.15928	1.30816	0.961877	0.992853	0.948554	0.963064	0.679305
		BBS9	0.831046	0.00883122	1.65176	0.461	1.61694	0.0063	1.12041	1.03916	1.94714	1.0066	1.24398	0.127671	1.05	0.79976
		BBX	0.880259	0.187201	1.14314	0.433	1.1977	0.36	1.0508	0.927925	0.914513	0.97134	1.18965	0.000103344	0.828502	2.51574e-05
		BCAM	1.21167	0.865104	3.18877	0.514	1.05842	1.7e-09	0.650565	0.610423	1.81388	2.37521	1.12944	0.432587	1.40118	0.00413743
		BCAP31	1.00975	0.997306	1.0519	0.962	1.00061	0.76	0.9086	1.36223	0.739009	0.646234	0.965991	0.504032	1.19492	5.46073e-07
		BCAR1	1.12117	2.67e-07	3.26029	0.529	1.88881	2.7e-23	0.868122	3.48554	2.58842	6.71268	0.87039	0.020976	1.03503	0.663459
		BCAR3	1.53475	5.88e-17	5.55582	0.124	5.50402	6e-17	0.949657	8.86162	5.11651	1.19748	1.08391	0.752508	0.846075	0.43881
		BCAS2	1.07773	0.0163427	0.841479	0.67	0.742204	0.21	0.927168	0.657445	0.777646	0.614816	0.904807	0.126686	1.0283	0.736768
		BCAS3	1	0.266265	1.27368	0.999	1.24861	0.22	0.894559	0.830962	0.845582	0.958782	1.0733	0.499754	1.16617	0.0650607
		BCAS4	0.691116	2.03e-08	0.74072	0.00968	0.496909	0.028	0.888807	0.607117	0.516772	0.520815	0.674139	0.00629873	1.01115	0.96287
		BCAT1	1.33978	0.0969256	0.973329	0.00428	0.84156	0.85	1.32391	1.11584	1.30443	0.991672	1.14211	0.00476318	0.707172	9.24059e-16
		BCAT2	1.23628	0.57842	1.04754	0.103	1.08509	0.78	0.761572	0.92132	1.13321	0.810401	1.1731	0.0112674	0.99003	0.922428
		BCCIP	0.631126	5.89e-09	0.566835	1.51e-05	0.562854	1.2e-08	0.890771	0.735879	0.623722	0.527528	0.72914	2.96324e-14	1.09345	0.0641145
		BCDIN3D	1.16716	0.804993	1.35097	0.679	1.09712	0.31	0.963218	0.947473	1.1479	0.608839	0.941497	0.858491	0.777757	0.319412
		BCHE	1.18181	0.692398	0.895025	0.309	0.930753	0.51	1.13888	0.456398	1.77901	7.07262	1.10018	0.783091	1.24591	0.430398
		BCKDHB	1.38896	0.00152937	0.836246	0.06	0.609493	0.34	0.99402	0.376984	0.668651	0.661399	1.17641	0.113995	0.786069	0.012002
		BCKDK	0.623733	0.707941	0.677362	9.84e-05	0.940614	0.00085	0.926957	1.62147	0.437743	0.581833	0.902752	0.140276	0.749622	4.3311e-07
		BCL10	1.79253	7.59e-12	2.73208	1.13e-05	2.28915	5.4e-17	1.05172	2.08511	1.56642	2.58731	0.75549	0.0362684	0.923705	0.6417
		BCL2	1.44794	0.656876	0.760489	0.0123	1.0858	0.061	0.989814	0.601293	0.809097	0.535788	0.845086	0.3384	0.995421	0.986007
		BCL2L1	1.36415	0.208908	1.58118	0.0162	1.18256	5.3e-05	1.03645	1.92841	1.31739	1.33829	0.950199	0.769034	0.891752	0.421847
		BCL2L11	1.46307	1.84e-22	2.94037	0.0141	3.35727	1.4e-17	1.25832	0.98697	1.70819	6.19505	1.03277	0.775166	1.02432	0.832236
		BCL2L12	0.64797	1.66e-07	0.632002	0.00259	0.510068	0.00061	0.853523	0.795096	0.443537	0.979221	0.890428	0.0837909	1.25382	7.03621e-05
		BCL2L13	0.698823	0.0951301	0.767373	0.00143	1.20963	0.015	0.956781	1.21246	1.07902	1.13413	0.831336	0.00331016	0.937368	0.397643
		BCL2L2	0.964598	0.551066	0.634196	0.856	1.09866	0.00017	0.843655	1.28545	0.558451	0.918102	0.923858	0.52465	0.670553	6.91644e-06
		BCL3	2.05765	5.56e-11	2.17347	9.35e-05	2.9675	7.2e-06	1.05854	3.05573	6.9055	1.8011	1.20401	0.608053	1.42389	0.229848
		BCL6	1.5042	0.273999	0.860353	0.00765	1.19822	0.39	0.965797	1.0678	1.69694	0.281901	0.986514	0.961627	1.46632	0.0154919
		BCL7A	0.874785	8.14e-05	0.793334	0.328	0.663536	0.04	0.833051	0.482371	0.224279	0.11879	0.900559	0.0805713	0.963719	0.614917
		BCL7B	1.64035	0.236268	0.837987	7.92e-05	1.18203	0.21	0.73049	0.813479	0.642559	1.04214	1.30362	0.000197581	0.893542	0.181339
		BCL7C	0.962594	0.0338639	1.58118	0.892	1.43649	0.0056	0.860591	1.41745	1.016	2.40146	0.815809	0.119003	1.20432	0.13637
		BCL9	0.775931	0.491235	0.846159	0.151	1.13741	0.35	0.909975	0.61768	1.4056	1.13508	1.07625	0.378109	0.813337	0.00176791
		BCL9L	0.767373	0.00384315	1.22603	0.071	1.44323	0.15	0.913628	2.39927	1.81232	2.49361	1.09191	0.623284	0.929247	0.683609
		BCLAF1	1.00556	0.0156937	0.76897	0.977	0.776291	0.012	1.04346	0.764601	0.912173	0.971701	0.957613	0.234142	0.937618	0.0423233
		BCLAF3	0.978742	0.0895303	0.971981	0.943	0.720134	0.92	1.06747	0.865712	0.987101	0.960467	0.983203	0.937939	0.925786	0.663459
		BCOR	0.77164	0.00338259	0.588046	0.0437	0.716704	1.1e-06	0.970053	0.688453	0.764705	1.58559	0.949322	0.240427	0.728317	7.07151e-22
		BCORL1	0.99654	0.966987	1.21083	0.988	1.01021	0.22	0.852276	1.14325	0.743486	0.732204	1.0914	0.229399	0.790925	7.05145e-05
		BCR	0.984184	0.33433	0.903753	0.943	1.15808	0.54	1.04613	1.39965	1.24758	0.872977	1.17037	0.00205736	0.9718	0.693827
		BCS1L	0.717972	0.000501823	0.688725	0.00799	0.674917	0.0011	0.906669	0.87464	0.53601	0.350035	0.976316	0.770915	0.915796	0.139745
		BCYRN1	0.486665	0.280782	0.865737	2.84e-09	0.856355	0.32	#N/A	#N/A	0.318721	0.562232	1.37597	0.076003	4.5214	5.70147e-28
		BDH1	0.711039	2.86e-08	0.483303	0.0131	0.51714	1.3e-09	0.983264	0.384525	0.305934	0.113314	1.50759	0.00934613	0.907266	0.659605
		BDH2	1.39571	0.278897	1.8226	0.0777	1.23026	0.00015	0.971324	0.550475	0.993075	0.804107	1.26668	0.0869476	1.40181	0.00672753
		BDP1	0.806083	6.69e-18	0.373971	0.0608	0.45	2.1e-26	1.12384	0.568448	0.356435	0.589243	1.00295	0.979989	1.09538	0.195847
		BECN1	1.06069	0.971761	0.855595	0.818	0.989276	0.45	1.01075	1.15917	0.779826	0.788228	1.11091	0.268158	0.919994	0.389375
		BEND3	0.535515	0.00402281	0.754713	3.36e-05	0.657122	0.072	0.75758	0.961645	0.949951	0.680511	0.948285	0.66428	0.931849	0.522854
		BEND6	1.2544	0.00755478	1.47939	0.313	1.6008	0.033	1.00293	1.78606	1.42591	0.757064	1.10327	0.82256	0.769439	0.462566
		BEND7	0.889459	0.83714	1.78015	0.639	0.947918	0.00049	1.0967	2.52449	1.48974	1.21026	1.09799	0.39722	0.688633	1.17957e-05
		BEST1	1.09657	0.000132993	0.408951	0.793	0.414346	0.00015	1.22921	0.169374	0.420458	0.714872	0.638465	0.146485	0.912531	0.821356
		BET1	1.3765	0.000216238	1.57789	0.0237	1.57695	0.00024	1.10874	1.04772	2.31908	1.07009	1.00861	0.957728	0.831902	0.0640923
		BET1L	1.05702	0.00223423	2.13169	0.795	1.50344	1.3e-09	1.06578	2.13072	1.61593	1.71749	1.08111	0.549928	0.773526	0.0096155
		BEX1	1.50108	2.28e-11	0.762601	0.000926	0.472484	0.029	1.24728	0.349045	0.291228	4.23554	1.06139	0.828198	0.757073	0.158832
		BEX2	1.87774	0.00877684	1.39765	5.22e-06	0.68713	0.019	1.12143	0.347493	1.1855	0.758375	1.03793	0.679543	0.823406	0.00177377
		BEX3	0.948027	4.19e-10	1.39959	0.729	1.81644	0.00091	0.774897	0.926417	0.80105	0.929345	0.982366	0.76407	1.07629	0.072104
		BEX4	1.18674	0.992591	1.00765	0.199	1.00187	0.97	0.739307	0.715464	0.700127	0.681137	1.01741	0.841536	0.738424	1.47932e-09
		BFAR	1.34817	0.496226	1.14076	0.00602	1.0919	0.26	1.03252	1.56917	1.17577	1.13536	1.02206	0.826646	0.792922	0.000126905
		BFSP1	1.02883	0.161686	0.911933	0.937	0.723294	0.76	1.15784	0.534222	0.507407	0.172716	1.2301	0.388961	1.34344	0.16088
		BHLHE40	2.11844	4.64e-08	2.47084	1.03e-06	2.206	3.3e-10	1.46508	3.26001	7.59906	59.9677	0.786816	0.00523591	0.807348	0.0131644
		BHLHE41	1.1088	0.470403	0.576343	0.763	0.814655	0.023	1.18294	0.898547	1.2001	102.779	0.888745	0.586346	0.710135	0.0398755
		BICD1	0.984866	0.0315403	0.928517	0.94	1.30098	0.65	1.11926	1.00805	0.597239	0.650159	0.853047	0.22225	0.881997	0.344197
		BICD2	0.811127	0.00561068	0.693515	0.0813	0.748116	0.00035	0.731931	1.32063	0.810738	0.783535	1.00879	0.919038	0.873664	0.00970519
		BICRA	0.785128	0.349245	1.42504	0.168	1.17454	0.016	0.812069	1.25583	1.08023	1.11615	0.78539	0.000355064	1.1782	0.0176417
		BICRAL	0.835088	0.592824	0.890693	0.403	0.891253	0.59	1.3008	1.05953	1.0953	0.949428	1.13574	0.468046	0.963127	0.859501
		BID	1.07699	0.94705	1.03814	0.689	1.01416	0.84	0.929376	1.09211	0.691695	0.506868	1.18647	0.0493327	0.916386	0.38544
		BIN1	0.793334	3.59e-11	1.48144	0.0704	1.96406	0.00026	0.85422	1.82934	2.32463	1.26661	1.25065	0.0117889	1.03635	0.782994
		BIN3	0.997923	0.456581	0.861546	0.993	0.855942	0.48	0.942163	1.10242	0.751528	0.877968	1.01142	0.970125	0.71032	0.0605566
		BIRC2	1.0196	3.67e-08	1.80125	0.924	1.8362	1.2e-07	1.3057	5.11586	4.49877	2.00629	0.918931	0.389536	0.817322	0.0108696
		BIRC5	1.01115	1.46e-05	0.405283	0.951	0.652703	1.1e-21	0.892166	0.487861	0.139362	0.19372	0.944854	0.213453	1.32861	4.72169e-17
		BIRC6	0.936272	0.0364932	0.715488	0.675	0.791765	0.0016	1.12642	1.1495	0.958046	1.04202	1.09362	0.0679972	0.844515	9.99461e-05
		BIVM	0.872968	0.0414649	1.93053	0.526	1.38544	5.8e-06	1.25439	1.61288	1.38739	1.2888	0.817934	0.111835	0.666169	0.00022689
		BLCAP	1.00765	0.231814	1.7219	0.969	1.16503	2.4e-07	1.24246	1.51294	1.68621	1.16892	1.04766	0.616239	0.81117	0.00149817
		BLM	0.942131	5.33e-12	0.411796	0.756	0.439035	2.2e-13	1.08232	0.423757	0.199623	0.234008	0.955072	0.534928	0.710432	1.61404e-11
		BLMH	0.95	0.00349427	0.617709	0.759	0.725525	5.5e-06	0.960565	0.405022	0.507036	0.651224	0.975766	0.784004	0.74581	6.05954e-08
		BLOC1S2	0.973329	0.992085	1.08824	0.896	0.997829	0.6	0.931353	0.989168	1.14068	1.27796	1.05502	0.555928	1.27022	0.000150404
		BLOC1S3	1.03814	0.24591	1.337	0.882	0.812088	0.08	0.998997	1.53471	0.868531	0.539412	0.797425	0.0222602	0.868298	0.184884
		BLOC1S4	1.00278	0.141878	1.20748	0.993	1.31783	0.36	1.0245	1.19326	1.16995	0.904217	0.826806	0.0490058	0.959376	0.749071
		BLOC1S5	1.12117	0.573463	0.537002	0.61	0.890151	8.3e-05	1.11389	0.515885	0.632765	0.512428	1.10693	0.438248	0.923877	0.557316
		BLOC1S6	0.842063	0.611976	0.990343	0.318	1.09586	0.96	1.02027	1.13061	0.333858	0.370927	0.819573	0.00284525	0.788479	0.000216932
		BLVRA	0.892547	8.22e-06	2.12285	0.508	1.68915	4.4e-11	1.02937	2.04645	1.37296	0.879864	0.970922	0.828069	0.841475	0.0592624
		BLVRB	0.590087	0.914267	0.973329	1.74e-05	0.978842	0.88	0.917943	0.898104	0.838692	1.01794	0.877551	0.195419	1.78851	4.71166e-15
		BLZF1	1.08975	0.552734	0.964598	0.643	1.1037	0.85	1.03056	2.05003	1.22515	1.14776	1.00986	0.94708	0.858875	0.10543
		BMF	1.42306	0.00076782	3.30122	0.0368	1.63962	1.3e-18	1.24064	0.487241	2.50225	3.17258	1.33939	0.12375	1.15094	0.522272
		BMI1	1.61217	8.37e-10	0.895025	8.13e-05	0.499989	0.46	1.00527	0.679188	0.82222	1.01571	0.994067	0.957351	0.711828	1.23621e-08
		BMP1	1.02314	6.27e-43	6.37312	0.914	4.30236	4.2e-69	0.773174	11.5905	9.13172	6.67282	0.928849	0.667868	1.07603	0.654499
		BMP2K	1.2518	0.95495	0.934327	0.386	1.01981	0.82	1.06908	1.47921	0.960745	1.71396	1.17348	0.360509	0.863792	0.407909
		BMP7	1.39765	0.286867	1.23029	0.342	1.40481	0.57	0.667331	0.994135	0.907903	0.507556	1.01274	0.904698	0.821839	0.00198385
		BMPR1A	1.00208	1.84e-11	0.630252	0.989	0.538323	1.1e-06	1.2204	0.642452	0.775158	0.904833	1.03042	0.777308	0.72179	8.26772e-07
		BMPR1B	1.15429	0.864922	0.79996	0.552	0.954734	0.29	1.28833	1.8929	0.654547	3.56725	1.53588	0.0220449	0.816576	0.378155
		BMPR2	1.08975	4.13e-08	1.64832	0.622	1.86505	1.8e-05	1.32538	0.970735	1.15478	2.05449	0.939837	0.488538	0.796816	0.000621747
		BMS1	0.932386	0.000405819	0.590087	0.619	0.712244	1.3e-08	0.980736	0.763158	0.731821	0.75276	1.01077	0.864485	0.933507	0.0987703
		BMT2	0.948684	6.67e-09	2.10089	0.872	2.76654	5.6e-05	1.38587	0.835866	2.10344	2.07835	0.815107	0.134017	0.839943	0.203351
		BNIP1	1.00835	0.162563	0.77164	0.983	0.726511	0.28	0.948392	0.610212	0.982199	0.7224	0.84322	0.236389	1.15829	0.293563
		BNIP2	1.10726	0.829699	1.00835	0.489	0.965316	0.96	1.04872	1.00705	0.606581	0.915237	0.803313	0.00100557	0.679464	8.00743e-10
		BNIP3	1.01748	1.68e-10	0.900002	0.934	2.02995	0.49	1.0859	1.69851	1.53327	1.30497	1.11892	0.136502	1.03376	0.729001
		BNIP3L	0.926588	3.17e-11	1.12896	0.597	1.85624	0.31	1.00433	1.21363	1.2792	1.32179	0.852103	0.094867	0.885979	0.219951
		BOC	1.75808	1.51e-20	4.13246	0.0514	7.78761	7.1e-10	1.3135	5.93799	7.04848	11.0435	1.02983	0.878026	0.981537	0.925097
		BOD1	1.15269	0.000969582	0.940826	0.365	0.671512	0.72	0.666289	0.608035	1.01829	0.607707	0.973339	0.709663	0.912836	0.0862022
		BOD1L1	1.11497	0.0451243	0.935623	0.37	0.819995	0.59	1.07799	0.988433	1.14234	1.13242	0.923137	0.312384	0.9223	0.284071
		BOLA1	0.855002	0.418785	1.05336	0.61	0.8074	0.87	0.98248	0.500404	0.355832	0.218916	0.833897	0.236389	1.02482	0.905813
		BOLA3	0.823591	2.55e-05	0.577943	0.415	0.472851	0.003	0.994504	1.24886	0.678868	0.467565	0.984046	0.951006	1.11316	0.593255
		BOLA3-AS1	0.977386	0.701067	1.39571	0.946	1.11184	0.12	0.937208	1.89231	0.365998	0.815278	1.06687	0.739322	0.902394	0.550743
		BOP1	0.649319	7.67e-11	0.676424	0.00255	0.441651	0.0039	0.853664	1.0414	0.508092	0.421466	0.803196	1.44849e-06	0.850853	0.000520234
		BORA	0.84792	0.00010701	0.489032	0.475	0.519302	2.8e-05	1.31515	0.664327	0.865802	0.4814	0.894198	0.216095	1.1586	0.0661348
		BORCS5	1.00278	0.726924	0.799406	0.992	0.91971	0.26	1.02771	1.01242	0.610627	0.769973	1.04199	0.864626	0.739126	0.0608154
		BORCS6	1.05482	0.11495	1.89212	0.91	1.58949	0.022	0.886106	1.59737	1.31647	0.529743	0.813345	0.388354	0.822887	0.404643
		BORCS7	1.11111	0.931137	1.00626	0.693	1.02669	0.98	1.23635	0.600327	0.542675	1.18244	0.804866	0.179245	0.679168	0.00612205
		BORCS8	0.533293	0.385067	0.880259	0.0473	0.750868	0.74	0.838373	1.16479	0.315123	0.879187	0.856687	0.457732	0.692066	0.0289391
		BPGM	0.945402	0.781944	0.828745	0.806	0.943263	0.27	1.05339	1.22166	0.474911	0.72911	0.992944	0.960116	1.79786	1.86899e-17
		BPHL	1.18181	0.00133102	1.33793	0.427	0.596432	0.091	0.9512	0.921044	0.890266	0.568136	1.35484	0.00678	1.07217	0.651725
		BPNT1	1.05263	0.168622	0.99447	0.815	1.23602	0.98	0.96818	0.827389	0.731426	0.844953	0.882534	0.0609583	0.900564	0.117608
		BPNT2	0.713013	0.398179	1.05409	0.00181	1.11115	0.71	1.01114	1.1789	1.10042	0.801974	0.815108	1.891e-06	0.694386	1.05355e-18
		BPTF	0.97942	0.459529	0.842063	0.914	0.901233	0.17	1.03365	0.697076	0.839669	0.941326	1.05978	0.288511	0.813752	1.001e-06
		BRAF	1.05409	0.217917	0.998615	0.79	1.19369	0.99	0.979589	0.844247	0.966707	1.06884	0.92301	0.356035	1.04124	0.675351
		BRAP	1.13997	0.894843	0.946058	0.374	0.976035	0.73	1.06528	0.939893	1.05623	0.886133	0.99582	0.97599	0.931716	0.463354
		BRAT1	0.859756	1.26e-05	0.887611	0.259	0.635382	0.36	0.954133	0.739073	0.722283	0.610023	0.940391	0.348192	0.930237	0.232619
		BRCA1	0.970634	5.76e-05	0.514057	0.898	0.575148	1.2e-06	1.10369	0.548768	0.203546	0.26322	1.0285	0.659588	0.886788	0.00732976
		BRCA2	1.25266	0.000571445	0.386623	0.144	0.642081	1.6e-14	1.28777	0.570747	0.222382	0.236827	1.34913	2.4425e-07	0.997945	0.986007
		BRCC3	1.15829	0.0289745	0.864537	0.335	0.760336	0.31	1.05993	0.769439	0.985847	0.741391	1.07666	0.293051	0.815331	0.000292001
		BRD1	0.984184	0.967256	1.02598	0.928	1.00765	0.87	0.9553	0.944174	1.15104	1.24381	0.956828	0.595388	1.10599	0.118177
		BRD2	1.10038	0.793643	0.924663	0.437	0.964756	0.51	0.968277	1.02076	1.08197	1.20128	0.917759	0.00103592	1.23976	1.43431e-20
		BRD3	0.796088	0.133055	1.08673	0.0522	0.84347	0.53	0.773605	0.764999	0.761794	0.767461	0.945771	0.428641	0.808911	5.79496e-05
		BRD3OS	0.882703	0.106898	1.35097	0.514	1.26986	0.035	1.04039	0.967542	0.488296	0.489203	1.13488	0.18013	0.828465	0.0287198
		BRD4	1.18921	0.808602	0.925946	0.122	0.966277	0.53	0.90866	0.924328	0.594623	0.715318	0.966243	0.463635	1.149	3.39847e-05
		BRD7	0.773246	4.78e-10	0.731029	0.0182	0.561927	0.0014	1.00596	0.691544	0.655643	0.608906	0.925092	0.146614	0.800817	4.59223e-07
		BRD8	0.951978	0.228738	0.922742	0.776	1.16413	0.58	0.998503	0.762583	1.07987	1.11521	0.947589	0.306419	1.06285	0.2111
		BRD9	0.875391	0.0651212	0.853226	0.377	0.795621	0.23	0.883008	1.16583	0.581207	0.63608	0.994047	0.957728	0.947976	0.522859
		BRF1	0.836826	0.169577	1.17365	0.291	0.814447	0.31	0.892996	1.21114	0.798814	1.23219	1.01964	0.860838	1.09733	0.234086
		BRF2	0.693515	0.914196	0.557483	0.0472	0.971881	0.00031	0.85919	0.698315	0.420358	0.377219	0.826538	0.392997	0.944275	0.831278
		BRI3	1.31585	0.244425	2.06051	0.0926	1.20694	4.3e-08	0.973892	2.54164	1.39346	1.52591	0.832199	0.00585213	0.827532	0.00367103
		BRI3BP	0.904379	2.02e-10	0.560583	0.508	0.513453	5.8e-08	1.05251	0.771556	0.368242	0.227393	1.15336	0.0139827	0.763016	4.41093e-07
		BRICD5	1.03097	0.174277	1.86607	0.942	1.43175	0.0091	1.00069	1.04299	1.38615	4.98778	1.43692	0.125918	1.36795	0.186452
		BRIP1	0.887611	8.98e-10	0.532185	0.517	0.457915	1.3e-06	1.11236	0.562603	0.263154	0.409457	1.01255	0.899402	0.903641	0.126375
		BRIX1	0.95396	1.5e-05	0.573951	0.799	0.609187	1.2e-06	1.01902	0.757253	0.642682	0.582422	0.855617	0.00910606	0.985928	0.878923
		BRK1	0.94737	0.0394163	1.07699	0.738	1.25937	0.6	0.86924	1.09434	0.968652	0.919064	0.91179	0.0970963	0.729822	6.71458e-12
		BRME1	1.13131	0.003128	0.78404	0.802	2.42089	0.56	1.24358	0.639718	0.268188	0.943963	1.17919	0.27972	1.17183	0.28493
		BRMS1	0.87843	0.578559	0.699793	0.5	0.902132	0.014	0.936432	0.962603	0.648396	0.661513	0.88234	0.10123	1.07594	0.375631
		BRMS1L	0.773782	0.386799	1.01255	0.122	0.863286	0.96	1.05333	0.847636	0.542066	0.705137	0.998593	0.992335	1.00922	0.945241
		BROX	1.07624	0.178007	1.13839	0.691	1.20772	0.4	1.1905	1.09228	1.29404	0.875589	0.995983	0.971022	0.869904	0.0341453
		BRPF1	0.944747	0.0725092	0.815072	0.784	0.773569	0.17	0.867027	0.927307	0.665738	0.899546	0.888518	0.0368454	0.981457	0.817411
		BRPF3	0.934975	0.704471	0.786762	0.699	0.939825	0.055	0.904709	0.946464	1.36776	2.51964	1.00364	0.972855	0.98091	0.83143
		BRSK1	0.945402	0.00050203	0.817335	0.785	1.55766	0.18	0.865055	0.613576	0.785747	0.417145	0.994617	0.97788	1.63703	3.03313e-07
		BRWD1	0.870551	0.490931	0.944092	0.417	0.892878	0.76	1.29623	1.08003	1.11141	1.01391	1.08885	0.170916	0.944429	0.387353
		BRWD3	0.645281	0.0396568	0.470739	0.0117	0.710012	8.7e-07	1.06277	0.349491	0.875309	0.683888	0.965401	0.703777	0.657598	6.97573e-13
		BSDC1	1.09885	0.0139594	1.34537	0.556	1.33553	0.012	1.07342	1.42941	1.04285	1.31409	0.977763	0.714408	1.08276	0.0711244
		BSG	1.27633	0.000223794	1.57571	0.0427	1.4678	8.7e-06	0.77986	1.28696	1.76743	1.59074	1.1473	0.0310568	1.2238	0.00038915
		BTAF1	1.25614	0.782595	0.667112	0.116	1.05145	0.001	1.28036	0.896424	0.683145	0.90586	1.12975	0.0100581	0.734202	4.21389e-13
		BTBD1	1.41421	0.0310094	1.08523	0.000817	1.24934	0.52	0.798321	1.00821	0.545423	0.808065	1.09476	0.0607555	0.767459	2.05098e-10
		BTBD10	1.17121	0.00111723	0.967947	0.279	1.45106	0.85	1.11335	1.70297	0.727488	0.574121	1.28879	0.0153041	0.854287	0.177716
		BTBD11	1.34071	6.97e-22	1.34537	0.0952	3.6607	0.067	1.05137	2.1183	2.71353	#VALUE!	1.58428	0.000698371	0.899021	0.5778
		BTBD2	0.821311	0.965522	1.12039	0.114	0.991784	0.37	0.74692	1.00927	0.938826	0.743421	0.879292	0.0321382	1.01885	0.828212
		BTBD3	0.871758	0.303997	0.632002	0.35	0.871524	3.7e-05	0.615012	0.626179	0.942241	0.775578	1.04264	0.617572	0.711989	1.2966e-09
		BTBD6	0.735603	0.0114945	0.816203	0.0326	0.719188	0.15	0.938307	1.09626	0.50706	0.828585	1.05423	0.605964	0.987708	0.919222
		BTBD7	0.946714	0.171304	0.948027	0.752	0.84105	0.74	1.21617	0.946372	1.31804	2.24842	0.990638	0.928816	0.696574	4.44323e-10
		BTBD8	1.35472	0.00142316	1.73027	0.487	2.67487	0.12	1.70937	1.07003	1.34672	1.61228	0.961847	0.914036	0.991819	0.98307
		BTBD9	0.987601	0.540578	0.924663	0.97	0.868095	0.76	0.883696	1.07085	1.46474	1.07255	1.21668	0.0679908	1.0007	0.996728
		BTD	0.893166	2.05e-13	3.21986	0.606	2.67264	1.3e-18	0.968622	4.85995	2.11863	2.37861	1.09845	0.376771	0.817339	0.0232534
		BTF3	0.757858	0.387434	0.873573	0.0163	0.895357	0.27	0.927804	0.887805	0.985843	0.758724	0.790421	3.04172e-17	1.25006	5.56337e-16
		BTF3L4	1.48555	0.0672147	1.23971	0.000965	0.798417	0.083	0.8856	0.616713	0.48273	0.334631	1.08816	0.22743	0.756281	7.12401e-07
		BTG1	1.82893	1.32e-16	2.87587	9.49e-07	2.5365	4.4e-21	1.23686	1.99352	2.2653	4.06261	0.799614	0.0255899	0.81865	0.0453261
		BTG2	1.25093	0.044652	1.52203	0.301	1.43356	0.017	1.15435	0.486574	1.07526	0.842427	1.15365	0.194446	2.43934	5.13522e-29
		BTG3	1.14235	0.00793068	0.864537	0.394	0.722698	0.31	1.11905	0.876518	0.787111	1.22002	0.863385	0.0671178	1.3945	6.04771e-07
		BTN2A1	0.90689	0.480447	1.05044	0.555	1.11152	0.77	0.957438	1.5849	1.14039	1.36171	0.876444	0.0443323	1.18313	0.00504042
		BTN2A2	0.912565	0.952804	1.37364	0.7	0.983963	0.058	0.853801	1.31412	0.549622	0.649413	0.862473	0.128549	0.800554	0.0113333
		BTN2A3P	0.667112	0.55034	1.0519	0.222	1.22171	0.9	0.991952	1.88748	0.891831	1.14196	1.10599	0.607004	0.862964	0.400508
		BTN3A1	0.944747	0.331182	1.16151	0.816	1.19276	0.43	1.11535	1.1137	2.26804	0.866969	1.35751	0.043807	1.08777	0.675709
		BTN3A2	0.942131	0.00388729	1.08673	0.771	1.45906	0.64	1.01409	0.862282	1.61129	0.506361	1.20057	0.108989	0.793882	0.0352124
		BTN3A3	0.954621	0.0941985	1.44593	0.87	1.36081	0.04	1.14985	0.904956	1.98657	0.902998	1.33584	0.286165	0.914726	0.79611
		BTRC	0.982821	0.288464	1.04247	0.933	1.15954	0.82	1.15702	1.10023	1.28673	1.39988	0.996085	0.972791	0.816243	0.00123858
		BUB1	0.890076	1.39e-07	0.517274	0.414	0.583048	9.2e-11	1.0791	0.589551	0.152728	0.211629	0.90895	0.0399869	1.06505	0.196754
		BUB1B	0.842647	3.91e-16	0.405564	0.241	0.409599	2.4e-16	0.978529	0.333078	0.123374	0.185224	0.980852	0.827982	1.01132	0.900744
		BUB3	1.00556	0.496803	0.835667	0.972	0.923002	0.071	0.899985	0.965407	0.442232	0.35814	0.949416	0.216423	0.751628	5.03195e-19
		BUD13	0.894405	5.52e-05	0.805524	0.455	0.644146	0.074	0.962088	0.841882	0.369998	0.562515	0.911024	0.424661	0.874645	0.196313
		BUD23	1.02598	0.174932	1.08673	0.882	1.17534	0.55	0.805192	0.858307	1.39041	1.26322	0.879136	0.00508168	0.987423	0.857373
		BUD31	1.11342	0.953267	1.03311	0.538	1.01283	0.87	0.972119	0.924808	0.996063	0.653843	0.928604	0.52007	1.13664	0.178412
		BYSL	0.792784	0.000266394	0.607097	0.124	0.63343	6.3e-05	0.879234	0.76387	0.656904	0.594231	0.774326	5.18396e-06	1.04564	0.561835
		BZW1	1.02883	0.467292	0.803851	0.865	1.09789	0.043	1.00543	1.28774	1.93715	2.01272	0.917242	0.0170308	0.939631	0.0974368
		BZW2	0.91067	0.000971893	0.643941	0.501	0.717664	7.2e-06	0.985891	1.06909	0.56985	0.60162	1.00047	0.996513	0.815083	0.00111511
		C10orf88	1.12584	0.589784	0.773782	0.57	0.89897	0.13	1.17755	1.1032	0.855782	0.709308	0.986708	0.942457	0.88479	0.35247
		C11orf1	1.12506	0.589721	0.964598	0.684	1.14929	0.91	1.49739	0.680484	0.840132	0.649181	1.21048	0.280288	1.0882	0.683372
		C11orf24	0.785128	0.737528	0.992404	0.096	0.94246	0.97	0.88225	2.75221	1.25883	1.86462	0.941386	0.515354	0.730582	2.08186e-06
		C11orf49	1.10496	0.021395	1.30586	0.459	1.26916	0.0091	1.03301	1.0081	1.1345	0.950311	0.930566	0.548351	1.10016	0.370134
		C11orf54	0.701736	0.965759	1.63467	0.098	0.98614	0.0066	1.15075	0.527233	1.22953	0.771598	0.813686	0.238084	0.900702	0.591802
		C11orf58	1.08073	0.318385	0.890076	0.564	1.12024	0.31	0.784852	0.807526	0.758909	0.602811	0.829022	4.25056e-07	0.99648	0.958164
		C11orf68	0.980779	0.00014642	2.13761	0.924	1.53891	2e-12	0.882092	2.98982	1.69859	2.36109	0.891558	0.445679	0.817038	0.112622
		C11orf71	1.19168	0.432485	0.79664	0.572	1.23807	0.42	1.19764	0.969751	0.653568	0.349153	1.21333	0.602207	1.18047	0.650533
		C11orf80	0.874179	0.00655087	0.940826	0.477	0.67803	0.76	1.01361	1.35337	0.558504	0.701728	1.10638	0.675111	1.064	0.806406
		C11orf95	0.758384	0.00146616	1.42504	0.0185	1.39179	0.00062	0.864565	1.05706	1.87301	1.45074	0.982473	0.859918	0.812523	0.000586088
		C11orf96	1.23542	1.07e-13	3.39638	0.665	8.03791	5.2e-05	0.633195	3.73679	4.9536	5.72671	0.450844	3.79349e-11	1.14484	0.374356
		C12orf29	0.967276	0.100369	0.78404	0.869	0.800928	0.071	1.06625	0.958745	0.597736	0.466186	0.88426	0.171739	0.946342	0.595508
		C12orf4	0.638607	0.000653289	0.776469	0.000786	0.654347	0.06	0.921087	1.04304	1.24004	1.1295	0.846837	0.0545256	1.14018	0.129815
		C12orf43	0.970634	0.17318	0.824162	0.906	0.793181	0.28	0.928844	0.768577	0.574478	0.801026	0.887894	0.209386	0.763742	0.000636094
		C12orf45	1.08749	0.000570929	0.825878	0.715	0.588475	0.3	0.991652	0.876974	0.609598	0.368305	1.16079	0.118916	0.963553	0.76808
		C12orf57	1.86865	0.0178564	2.22376	0.000265	1.50005	3.3e-07	0.889643	0.937889	1.62852	1.67842	0.696247	0.237802	0.818877	0.550014
		C12orf65	1.04102	0.504554	1.13446	0.846	0.895922	0.43	0.989345	0.910367	0.886222	0.524084	0.816965	0.0324986	1.12251	0.255561
		C12orf66	0.886382	0.013685	0.443806	0.584	0.671292	1.8e-07	1.008	0.68017	0.721979	0.337674	1.08772	0.594774	0.868971	0.305164
		C12orf73	0.953299	0.0878985	0.831046	0.842	1.30904	0.3	1.02668	0.588118	0.508097	0.233243	0.984496	0.933146	0.988489	0.949392
		C12orf75	1.35754	1.32e-19	1.23114	0.022	2.68413	0.12	0.983707	8.11877	1.06738	3.70414	1.02623	0.813044	0.841539	0.0155838
		C12orf76	1.47734	1.64e-08	1.55509	0.0623	2.57597	0.019	1.37587	0.722562	2.0566	1.87412	1.15316	0.452011	0.866589	0.44303
		C14orf119	1.11806	0.449877	1.1607	0.474	1.11559	0.27	1.06441	1.26703	0.81848	0.931448	0.817623	0.0251976	0.841359	0.056316
		C14orf132	1.17121	5.41e-05	2.24078	0.598	2.21026	4.5e-05	0.701061	1.5075	0.839736	0.640189	1.33796	0.00433836	0.622914	2.85101e-06
		C14orf28	1.2861	0.536025	1.8302	0.504	1.24529	0.033	1.05265	2.15655	1.40769	1.37003	0.909947	0.781292	0.914705	0.785978
		C14orf93	0.763659	0.0277237	0.798298	0.32	0.611644	0.39	0.97414	0.554798	0.759145	0.477838	0.94914	0.860353	0.994737	0.987698
		C15orf39	0.831622	0.00271007	0.774856	0.224	0.690218	0.052	0.902232	1.25693	1.15822	1.61728	0.966866	0.717368	0.656775	2.91214e-13
		C15orf40	1.089	0.0526499	1.27544	0.741	1.41285	0.21	1.03555	0.97785	0.833508	0.930366	0.991432	0.939129	0.854895	0.0212002
		C15orf61	1.13918	0.0811176	1.03526	0.756	0.585541	0.94	0.989974	0.861218	0.965829	0.745498	1.03903	0.911183	1.29079	0.288503
		C16orf70	0.873573	0.00672623	0.856782	0.447	0.692453	0.33	1.12923	0.860002	0.927035	0.768994	0.97454	0.853523	1.08867	0.425833
		C16orf72	1.04102	0.0792477	0.783497	0.811	0.818621	0.027	1.13875	0.869675	1.02249	1.16003	0.870076	0.0131705	0.925295	0.209012
		C16orf87	1.53156	0.872136	1.05848	0.00116	0.968595	0.75	0.946248	0.720993	0.42322	0.300564	1.07989	0.488538	1.16889	0.0812473
		C16orf91	0.959929	0.623487	0.93174	0.879	0.897627	0.77	0.937238	0.746699	0.916826	0.7505	0.812554	0.0633571	0.945564	0.700166
		C17orf58	0.378929	0.71682	0.532923	6.44e-08	0.916344	0.0003	0.935617	1.26217	0.620296	0.680207	0.725256	0.000905207	0.816837	0.0490648
		C17orf75	1.18427	0.970352	0.792235	0.335	1.00956	0.13	1.06021	0.595439	0.735159	0.727612	1.04207	0.69605	1.10086	0.250108
		C17orf80	0.899378	0.0121768	0.733567	0.532	0.729902	0.015	1.02029	0.593232	0.826322	0.805382	0.932642	0.491539	0.902654	0.249352
		C18orf21	1.13446	0.665366	1.06955	0.624	0.898556	0.8	1.09582	0.896349	0.810425	0.84744	0.917935	0.465547	0.861995	0.135117
		C18orf25	1.33978	2.27e-05	1.10038	0.0164	0.63144	0.5	1.02886	0.910261	0.827563	0.86851	0.971919	0.804686	0.945787	0.565384
		C18orf32	1.54328	0.0278159	1.88426	0.172	1.816	0.02	0.973836	0.915528	1.28099	0.880422	1.12649	0.751232	3.31998	2.58049e-08
		C18orf54	0.808321	0.099774	0.986917	0.206	1.27308	0.95	1.08931	1.12996	0.318169	0.447632	1.00043	0.997783	0.663145	0.000257126
		C19orf12	0.569592	0.33016	1.10343	1.91e-05	1.1583	0.55	0.888274	1.16041	1.53942	2.05069	0.774006	0.00296132	0.660566	3.31169e-07
		C19orf25	0.959929	0.958631	1.09051	0.843	0.988423	0.61	0.864737	0.942724	0.419735	0.638502	0.833539	0.0188498	0.805587	0.00357926
		C19orf44	0.970634	0.542349	0.840896	0.943	0.824296	0.59	0.973937	0.820979	0.859653	0.439067	0.862436	0.296364	0.935959	0.685362
		C19orf47	0.712025	0.035286	0.564091	0.0308	0.73538	3.1e-05	0.903108	0.906891	0.611746	0.882754	0.860088	0.101708	0.789545	0.00435967
		C19orf48	0.596254	3.47e-17	0.455967	3.82e-06	0.420117	4.2e-14	0.832442	0.619502	0.192865	0.283694	0.711979	9.1651e-20	0.713183	4.40254e-19
		C19orf53	0.816769	2.35e-06	0.702222	0.213	0.547996	0.0093	0.841422	0.898454	0.658675	0.654645	0.832007	0.000364716	1.08497	0.159618
		C19orf54	1.18838	0.945917	0.909408	0.324	0.984198	0.61	1.07717	0.742508	1.0092	0.781649	1.05077	0.565891	0.99922	0.995328
		C1D	1.33886	0.316758	1.05629	0.0501	1.16818	0.77	0.991172	0.796691	1.19398	1.13027	0.97909	0.88918	1.05225	0.69602
		C1GALT1	0.857971	0.983373	1.05044	0.546	1.00662	0.86	1.30829	1.27609	1.68801	1.98928	0.928846	0.567202	0.690858	5.47694e-05
		C1GALT1C1	1.0403	0.299055	0.987601	0.878	0.822907	0.96	1.22947	1.50426	0.948148	0.51769	0.733433	0.000118311	0.631966	4.0341e-09
		C1orf109	1.00486	0.0339123	0.797192	0.984	0.744429	0.12	1.03918	0.728586	0.65345	0.272808	0.850789	0.00565488	0.914249	0.162053
		C1orf112	0.889459	0.000184919	0.512278	0.569	0.582273	3.7e-06	1.12047	0.512136	0.143204	0.233725	1.01966	0.874593	0.814846	0.00848393
		C1orf122	0.989657	0.0621313	1.55509	0.97	1.34693	0.0033	0.905382	1.4941	1.11955	1.24115	0.947204	0.66453	1.00888	0.951483
		C1orf131	0.483303	0.353608	0.810565	4.3e-06	0.844263	0.23	0.972653	0.868049	1.02278	0.491301	0.542126	6.85867e-19	0.899972	0.226141
		C1orf159	0.93045	0.398014	1.01466	0.71	0.87461	0.95	0.891124	1.0589	0.957554	0.886828	0.926642	0.459746	0.752969	0.000247744
		C1orf174	0.908148	0.00142821	0.912565	0.555	0.689023	0.55	0.925701	0.934682	0.751141	0.622178	0.856763	0.0426517	0.982218	0.87374
		C1orf198	1.22349	0.520183	2.29421	0.0803	1.08612	5.5e-20	0.922868	2.35981	0.934661	3.35911	1.0389	0.633132	1.03344	0.678131
		C1orf21	1.12428	0.00579436	0.81169	0.477	0.709555	0.13	0.984936	2.13128	0.889996	1.13475	1.16534	0.0794558	0.746976	0.000211946
		C1orf216	0.63244	0.0198974	0.61005	0.000611	0.737053	7.3e-05	0.893857	0.915834	0.632115	0.912174	0.998291	0.993571	0.689986	0.000980733
		C1orf226	0.982821	0.00582461	0.557483	0.932	0.716526	4.5e-07	1.01847	0.27482	0.228584	0.313349	1.0469	0.828597	0.767749	0.0685072
		C1orf35	0.804966	0.504402	1.21672	0.242	1.13543	0.25	0.878789	0.662784	0.47969	0.645328	0.89869	0.0228268	1.08277	0.0970846
		C1orf43	1.10573	0.681387	0.825878	0.42	1.05529	0.058	0.973334	0.825931	0.792403	0.62759	0.973922	0.595317	1.11382	0.00182863
		C1orf50	0.96929	0.809027	0.969962	0.944	0.911629	0.94	1.07714	1.11721	1.03896	0.964498	1.09765	0.782547	0.687668	0.135653
		C1orf52	0.981459	0.415169	1.1042	0.936	0.874822	0.57	0.855173	1.14006	1.72752	2.16266	0.901175	0.185211	0.737548	2.21949e-06
		C1orf56	0.951318	0.932534	1.49071	0.904	1.03572	0.14	0.796631	1.01748	0.58415	0.856982	1.07547	0.774112	0.946926	0.832573
		C1orf74	0.946058	0.945497	0.627636	0.864	1.02332	0.031	1.00795	0.842442	0.371178	0.258737	1.19149	0.488999	0.615283	0.0186956
		C1QBP	0.748461	2.75e-08	0.515484	0.00656	0.595732	6.4e-13	0.949423	0.618032	0.660241	0.364824	0.977078	0.644279	0.870862	2.5699e-05
		C1QL1	1.21841	0.208949	0.530344	0.438	0.756751	0.0016	0.762514	0.109116	0.226919	0.853148	0.951602	0.813315	1.04816	0.815976
		C1QTNF1	0.942785	0.000338205	1.95342	0.863	2.05042	0.001	0.965628	2.71346	3.79383	6.59565	1.3547	0.329502	0.744838	0.360572
		C1QTNF6	0.900002	0.000885757	2.05908	0.715	1.83185	5.5e-05	1.00148	1.45379	6.05571	2.22746	1.4481	0.00308163	1.11098	0.521612
		C1S	0.986917	7.48e-12	3.06312	0.976	4.11905	1.8e-07	0.845989	5.12261	4.52884	1.19486	0.637128	0.134712	1.6251	0.0673475
		C20orf194	1.00208	0.467018	1.38992	0.994	1.12998	0.016	0.92437	1.73786	3.07416	4.47899	1.20664	0.125264	1.16733	0.210751
		C20orf27	0.694959	0.0210522	0.806083	0.00808	0.739448	0.12	0.690672	0.905684	0.505452	0.320456	0.902299	0.0693753	1.02341	0.757723
		C20orf96	1.26751	0.126334	1.26138	0.168	0.782718	0.15	1.01086	0.628094	0.791651	0.544113	0.98038	0.926614	0.865664	0.347533
		C21orf58	0.696406	0.12505	0.556711	0.0779	0.741876	0.00098	1.18602	0.458964	0.202858	0.269797	1.15747	0.0252783	0.843669	0.00780825
		C21orf91	0.959264	0.252239	0.983502	0.856	0.828931	0.94	1.09782	0.627209	0.795396	1.02918	0.811941	0.0138683	0.732399	8.11486e-05
		C22orf23	1.41814	3.09e-06	4.53468	0.38	3.6261	2.9e-08	1.04559	1.35012	4.26481	2.88527	1.04978	0.882846	1.33503	0.203522
		C22orf39	0.787854	3.62e-10	1.08598	0.206	0.392477	0.7	1.0126	0.696878	0.443387	0.631592	0.882898	0.193633	0.86357	0.10065
		C22orf46	0.906262	0.0035164	0.7495	0.615	1.47992	0.048	1.25958	0.890928	0.544687	0.849846	1.06054	0.535424	0.645599	4.4791e-11
		C2CD2L	0.974004	0.988494	0.816203	0.903	0.996733	0.16	1.14594	1.16281	1.02102	0.643813	0.85886	0.110328	0.839243	0.051747
		C2CD3	0.855595	0.0364932	0.806083	0.272	0.779836	0.079	1.01349	0.758404	0.646192	0.760149	0.916001	0.290004	0.940192	0.476462
		C2CD5	0.99585	0.970533	1.02598	0.986	0.989753	0.92	1.12289	0.793821	0.767804	0.848031	1.22207	0.000654255	0.665984	6.8188e-13
		C2orf42	1.21251	0.434443	0.934327	0.387	0.84518	0.79	1.0909	0.846224	1.48313	1.19569	0.956972	0.848945	0.815536	0.221553
		C2orf49	1.14711	0.718928	0.938221	0.413	1.06655	0.72	1.104	0.65435	1.09055	0.736291	1.0651	0.527364	0.888223	0.15654
		C2orf68	0.890076	0.855392	0.781328	0.474	0.966624	0.055	1.03732	0.570873	0.469254	0.441949	1.04903	0.702418	0.751289	0.000759745
		C2orf69	1.06216	0.679821	0.537747	0.763	0.928015	1.3e-06	1.37369	0.804545	0.539797	0.532147	1.0984	0.390851	0.719191	0.000110328
		C2orf76	1.27544	0.484432	0.961261	0.308	1.18181	0.9	0.838288	0.839703	0.723953	0.418166	0.914113	0.749804	0.736949	0.147871
		C3orf14	1.33145	0.797218	1.28076	0.189	0.93281	0.24	1.67411	1.23779	0.368427	0.466386	1.07555	0.571144	0.933542	0.585524
		C3orf38	1.00975	0.536405	0.917004	0.965	1.0995	0.58	1.08001	0.959542	1.07196	1.11942	0.931679	0.525209	0.96166	0.744397
		C4orf3	0.794985	0.296627	1.11111	0.0756	1.14578	0.45	0.896632	1.45542	0.958352	1.26465	0.689162	5.10226e-06	0.742056	0.000326724
		C4orf33	1.24401	0.897772	0.634635	0.521	0.94939	0.11	1.37083	0.883808	0.726093	1.13578	1.16296	0.194446	1.22231	0.0557032
		C4orf46	1.23799	1.06e-27	0.679243	0.109	0.310569	0.00069	0.884445	0.756512	0.181686	0.28729	1.0007	0.994776	0.83285	0.00563865
		C4orf48	1.23799	0.00101271	1.46917	0.385	1.82916	0.054	0.854259	1.47154	1.11294	0.881438	1.01847	0.909555	1.10787	0.384233
		C5orf15	1.50733	0.000535248	1.31039	8.62e-05	1.41484	0.0095	1.20451	1.15975	2.58396	3.01585	1.02991	0.673439	0.886902	0.0155742
		C5orf22	1.00905	0.945663	1.01396	0.97	1.01529	0.95	1.0738	0.892309	0.619568	0.608258	0.929887	0.452985	0.915305	0.319621
		C5orf24	1.33607	0.00340793	1.26839	0.0453	1.45462	0.086	1.06838	1.07121	0.838158	0.789855	1.12842	0.0474062	0.702628	3.00139e-11
		C5orf34	0.787854	0.0199841	0.505927	0.277	0.65567	0.0001	1.06492	0.687356	0.252413	0.36777	1.02001	0.927213	0.873629	0.392235
		C5orf51	0.726986	0.187425	0.990343	0.0282	0.825081	0.96	1.16974	0.786735	1.08653	0.982882	0.839446	0.00300455	0.861083	0.0122751
		C6orf120	1.03168	0.051453	0.75054	0.88	0.766946	0.034	1.02456	1.01797	1.222	0.899061	1.11499	0.200483	0.893629	0.170354
		C6orf136	0.731029	0.00285145	0.592136	0.112	0.605289	0.002	0.995472	0.835986	0.755866	0.643191	1.04963	0.79974	0.84285	0.227222
		C6orf47	0.666649	0.713526	0.978063	0.0321	0.918344	0.94	0.922667	1.19936	0.388953	0.625883	0.84185	0.276179	0.694402	0.00636546
		C6orf62	1.19416	4.97e-05	1.37936	0.179	1.53593	0.0035	1.16938	1.47338	1.31777	1.34272	1.04391	0.505185	0.775541	2.14323e-08
		C6orf89	1.03455	0.198802	1.1088	0.85	1.17452	0.46	1.10705	1.4351	1.64358	1.64561	1.17513	0.00289059	0.769218	3.90904e-07
		C7orf26	1.15509	0.0752767	1.01326	0.329	0.800445	0.95	0.831287	0.810226	0.902621	0.698745	0.951165	0.650691	1.14982	0.0907058
		C7orf50	0.888227	0.421883	1.01607	0.482	1.1313	0.94	0.836065	0.968368	0.633275	0.497899	1.00453	0.966022	1.03257	0.70504
		C8orf33	0.99103	0.0332324	0.675019	0.957	0.805935	2.9e-05	0.69199	0.665335	0.480685	0.49609	0.836388	6.12028e-05	1.18309	0.000109293
		C8orf58	1.1704	7.44e-05	1.65176	0.457	1.80994	0.0012	1.03404	2.04624	1.32517	2.70153	1.21005	0.62702	1.10057	0.823368
		C8orf82	0.976709	0.0668623	0.898755	0.919	0.766207	0.55	0.953737	0.8532	0.374615	0.654252	1.07174	0.533733	0.672201	5.04376e-07
		C9orf116	1.61217	2.94e-06	2.09507	0.0524	2.55855	0.00043	1.20447	0.500541	1.57651	0.312569	1.26603	0.21175	1.66466	0.000878714
		C9orf16	1.06659	0.692604	1.43993	0.773	1.08249	0.013	0.899185	0.875668	0.883139	0.942719	0.971099	0.82522	1.07189	0.513707
		C9orf40	1.18017	0.246793	0.707597	0.339	0.833781	0.015	0.899319	0.770824	0.419308	0.330753	0.937152	0.445798	0.807516	0.000877615
		C9orf64	1.34257	0.130496	1.1704	0.0505	1.24662	0.32	1.21333	1.34662	0.47501	0.645869	0.967289	0.762935	0.834052	0.015068
		C9orf72	1.12584	0.236242	0.695441	0.681	0.763291	0.1	1.37902	1.02593	1.15682	0.869966	1.13008	0.432534	0.804711	0.105123
		C9orf78	1.26313	0.403785	1.07252	0.0766	0.888887	0.65	1.00742	0.997622	0.677498	0.520855	1.04376	0.633641	0.814714	0.0011805
		C9orf85	1.32225	0.032224	1.29056	0.172	1.4585	0.19	0.960125	1.10479	1.30676	0.948445	0.945139	0.759991	0.929135	0.664801
		CA11	1.07326	0.0184254	1.37745	0.766	0.684292	0.048	0.944584	0.072538	0.908103	2.11383	1.1793	0.312301	1.07041	0.724584
		CA12	2.75108	4.7e-43	4.96571	5.44e-10	7.52355	1.2e-26	0.965164	5.94628	39.1886	35.7668	1.1343	0.65689	0.775433	0.290777
		CA5B	0.756808	0.994915	1.56699	0.226	0.997802	0.016	1.27765	0.785492	1.02237	1.03394	0.733157	0.0521334	0.71404	0.0303579
		CA5BP1	0.986233	0.341185	0.850864	0.969	1.24533	0.53	0.991069	0.900576	0.782901	1.0115	1.09619	0.592523	1.77481	2.30277e-07
		CA8	0.859756	8.19e-13	0.27797	0.412	0.383969	1.6e-20	1.28388	0.591949	0.11155	0.0853035	1.0362	0.709663	0.757672	8.60518e-06
		CAAP1	1.23456	0.624894	0.810565	0.279	0.901838	0.26	1.11226	0.820138	0.763085	0.620749	1.01875	0.871352	0.799156	0.00157053
		CAB39	1.21757	4.11e-05	0.643495	0.12	0.650603	2.8e-05	1.1124	0.854168	0.511206	0.494292	0.983973	0.84455	0.92724	0.195934
		CAB39L	2.00555	0.224634	1.05995	3.88e-05	0.787338	0.82	0.960022	1.1087	1.80673	2.07197	0.797119	0.395209	1.28924	0.290277
		CABIN1	1.02172	0.0392161	0.93368	0.909	0.786312	0.65	0.929333	0.735245	1.27138	0.919536	1.19844	6.24199e-07	1.16549	2.98944e-05
		CABLES1	2.04486	3.81e-35	5.23431	6.78e-10	3.71223	9.6e-56	0.928679	7.55547	4.7989	6.74184	0.939797	0.485088	0.619524	1.46454e-14
		CABLES2	0.409235	0.00547404	0.656561	2.62e-10	0.674292	0.0031	0.747672	0.647792	0.308361	0.598459	0.608752	2.26675e-08	1.24507	0.0201921
		CABYR	0.621575	0.972566	0.613017	0.0767	0.985609	0.048	0.957374	0.942966	0.335266	0.375778	1.03925	0.88538	1.44437	0.0270136
		CACFD1	1.11806	0.00399623	1.95613	0.688	1.69406	0.00017	0.793023	0.841144	1.03274	1.32411	0.952988	0.806491	1.0062	0.977359
		CACHD1	0.859756	0.678309	0.613442	0.387	1.07996	0.00021	0.907364	0.941114	0.692103	1.5921	0.996442	0.970942	0.80838	6.5386e-05
		CACNA1C	1.79129	4.83e-14	3.96962	0.0114	4.11992	3.6e-13	0.90424	1.71598	1.95866	1.71112	1.60287	0.117412	2.0297	0.00740164
		CACNA1G	0.426317	0.404594	0.803294	0.00122	1.26821	0.47	0.904637	0.0931204	1.58748	1.88603	1.6478	0.0354744	1.27006	0.388186
		CACNA1H	0.668037	5e-10	0.660669	0.00271	0.476875	0.00095	0.932174	0.262443	0.532007	0.871038	1.372	3.12022e-06	1.37206	2.60529e-06
		CACNA1I	4.01946	4.26e-05	0.242155	5.13e-05	0.209023	0.00028	0.988974	0.0596441	0.0604031	0.15652	0.902985	0.87111	13.1584	5.09184e-19
		CACNA2D1	0.585199	0.00671146	0.791137	7.53e-05	0.697172	0.1	1.02311	1.02673	0.65102	1.14925	0.709035	0.00026215	0.988855	0.943943
		CACNB1	0.755236	0.0929837	1.93187	0.368	1.51327	0.0039	0.893238	1.79583	1.65843	1.0072	0.717749	0.0586112	1.0647	0.79098
		CACNB2	0.575146	2.78e-08	0.378142	0.00286	0.397723	7.4e-09	1.18098	0.147944	0.357191	0.950097	1.10131	0.685318	1.0393	0.884483
		CACNB3	0.93174	0.000938203	1.55509	0.701	1.48843	0.00022	1.01525	1.58597	0.650622	0.97389	1.23447	0.10494	0.908746	0.536963
		CACTIN	0.80107	0.14209	0.91067	0.291	0.762739	0.68	0.890228	0.943744	0.875213	0.888891	0.845596	0.0542503	1.27524	0.00166745
		CACUL1	1.29594	0.187411	0.887611	0.0293	1.17111	0.36	1.25547	0.860898	0.931092	0.588993	1.18957	0.000577105	0.771662	1.19188e-07
		CACYBP	0.818469	0.000192197	0.366275	0.076	0.700436	7.5e-29	0.98599	0.670151	0.318588	0.26262	0.96019	0.362704	1.09897	0.00750783
		CAD	0.870551	1.49e-26	0.513345	0.209	0.414995	1.5e-15	1.02076	0.534519	0.300441	0.389643	0.968317	0.466784	0.885339	0.000162712
		CADM1	1.18921	0.325263	1.45801	0.622	0.74583	0.17	0.66519	0.382778	0.857207	0.0904217	1.07074	0.409739	0.735735	5.82063e-07
		CADM4	1.05336	0.00502141	1.9172	0.825	1.51068	3e-06	0.756415	1.02439	1.08196	0.819224	1.03909	0.83289	1.11438	0.445681
		CADPS2	1.42701	2.36e-18	0.533293	0.000996	0.434551	9.7e-11	0.973282	0.457477	0.737701	0.569194	1.25138	0.0621356	1.02353	0.898894
		CALCB	2.23303	2.95e-12	1.24229	1.74e-08	0.357848	0.2	1.08837	0.532291	0.979783	1.10737	1.57434	1.72558e-06	1.18457	0.135182
		CALCOCO1	1.19997	7.33e-15	3.13182	0.297	2.62822	2.2e-20	1.08501	1.12425	1.44266	1.31081	0.933279	0.457641	0.9167	0.304967
		CALCOCO2	1.07326	0.998809	0.89751	0.611	0.999825	0.36	1.16252	1.3059	0.942747	1.00849	0.975512	0.769521	0.831204	0.000618432
		CALD1	1.09885	0.0428069	3.07588	0.531	1.26252	7.5e-30	1.30657	6.48279	1.17922	9.5348	0.990232	0.887628	0.811422	1.58616e-07
		CALHM2	1.07699	0.000104666	2.71321	0.77	1.8225	1.3e-11	0.754554	2.49721	1.82752	2.20271	1.24182	0.456258	1.34922	0.240671
		CALM1	1.09354	0.000134446	0.507683	0.474	0.708705	2.4e-15	0.902603	0.597369	0.441935	0.761849	1.06869	0.0908359	0.946502	0.168295
		CALM2	1.26839	0.0041807	1.63354	0.0569	1.36973	2.6e-06	1.08863	1.63483	1.15299	1.25799	0.960333	0.41152	0.848661	6.331e-06
		CALM3	0.777007	6.28e-06	0.865737	0.0572	1.6497	0.29	0.841356	1.24437	0.57245	0.724132	1.00274	0.961064	0.933975	0.0358637
		CALR	1.00696	0.676406	1.41128	0.975	0.932666	0.0046	0.810576	1.8109	1.50521	1.51263	0.967432	0.352454	0.971271	0.403746
		CALU	1.04464	0.0007665	1.44493	0.767	1.37269	7e-05	0.949569	2.59795	1.737	2.18902	0.888141	0.0014368	0.68866	7.75267e-29
		CAMK1	0.535144	0.79364	0.847332	0.0843	1.1224	0.7	0.861205	0.903818	0.600095	0.990333	0.802726	0.424464	1.11741	0.710686
		CAMK1D	1.5252	0.429691	1.25266	8.2e-05	0.901731	0.042	1.14887	0.599884	1.3717	3.22239	1.7757	2.0417e-06	0.974267	0.904616
		CAMK2D	0.898755	1.11e-17	2.13317	0.452	2.27182	4.4e-15	0.967866	3.40613	2.45329	10.2188	0.910209	0.312772	0.949047	0.611022
		CAMK2G	0.827023	0.58632	0.957935	0.155	1.08288	0.79	0.98776	1.13643	0.852874	0.72963	0.967963	0.761584	0.869633	0.0640923
		CAMK2N1	1.79129	0.00245259	1.67597	0.137	2.66008	0.17	1.235	12.3053	3.47698	2.02119	1.14871	0.307114	0.928127	0.627385
		CAMKK1	0.616854	0.807207	0.882091	0.00827	0.941788	0.57	1.20376	0.342249	0.934493	1.51683	1.31309	4.43574e-05	1.02254	0.83846
		CAMKK2	0.719467	0.000261295	0.617709	0.0169	0.639754	7.9e-05	0.950057	0.910011	0.824078	0.569082	0.907607	0.0870587	0.745162	7.68292e-10
		CAMKMT	0.90125	0.930517	0.972655	0.693	1.02625	0.92	0.98188	0.762298	1.30468	0.655259	1.15551	0.380155	0.986879	0.952628
		CAMLG	0.951318	0.2735	1.00347	0.781	1.15696	0.98	0.959484	0.891611	1.41062	0.879907	0.871615	0.025706	1.19497	0.00156644
		CAMSAP1	1.089	4.76e-06	0.818469	0.53	1.53576	0.058	0.961953	0.979948	0.734032	0.626606	1.06838	0.390489	1.20658	0.00141481
		CAMSAP2	1.13603	0.270138	0.938221	0.355	1.14664	0.66	0.942689	0.98529	1.00268	0.885983	0.939058	0.337138	0.795505	5.10469e-06
		CAMTA1	1.21672	0.601783	1.07923	0.17	1.08624	0.64	0.822613	1.07303	0.93674	0.845181	1.01022	0.927279	1.02515	0.801194
		CAMTA2	0.861546	0.937137	1.15509	0.448	1.0197	0.42	1.07558	2.21288	1.81916	1.68247	0.977143	0.809834	0.825376	0.00146118
		CAND1	0.828171	0.509034	0.722465	0.114	0.917658	0.0013	0.986996	0.765593	0.797753	1.05077	0.989598	0.854782	0.834246	2.70454e-08
		CAND2	0.53924	0.000129096	0.604159	0.0025	0.489341	0.01	0.777134	0.494371	0.286554	0.94343	0.938626	0.491835	1.20457	0.00663277
		CANT1	0.904379	0.0732129	0.866938	0.575	0.782966	0.35	0.866721	1.19708	1.02741	0.866466	1.00698	0.944724	0.923392	0.233665
		CANX	1.07773	0.0270301	0.938221	0.569	0.806177	0.61	0.861471	1.23558	1.67799	1.31739	0.912034	0.00177008	1.07858	0.00977992
		CAP1	1.05995	0.0183809	1.06142	0.689	1.26996	0.65	0.944982	2.45813	0.833271	1.43114	0.902219	0.0323031	0.941232	0.244559
		CAP2	1.05922	2.2e-14	1.05117	0.765	0.402551	0.78	1.03294	1.55873	0.575808	1.61315	1.00817	0.966427	0.87222	0.29753
		CAPG	1.09354	5.26e-10	1.43594	0.56	1.88238	0.00082	0.948584	1.36148	0.898667	2.13724	1.08503	0.82712	1.54665	0.0741185
		CAPN1	0.809442	2.73e-05	1.46917	0.0726	1.50901	0.0001	0.939788	2.77051	1.24417	1.25067	0.89754	0.0794284	0.93085	0.275459
		CAPN10	0.960595	0.695888	1.14076	0.857	1.07751	0.44	0.901732	0.956239	0.737945	0.51649	0.965982	0.76725	0.976905	0.843459
		CAPN10-DT	0.818469	0.90772	0.837987	0.597	1.0505	0.62	1.12405	0.746828	0.678672	0.637944	0.900802	0.709415	1.15959	0.54554
		CAPN15	0.980099	0.615364	1.02385	0.916	1.07973	0.9	0.94092	1.47095	1.51055	1.10171	0.871844	0.00446638	1.04095	0.506907
		CAPN2	0.93174	0.45667	1.58887	0.717	0.88512	0.00029	1.0094	3.06913	2.47368	2.42603	0.875275	0.000520435	1.02039	0.716546
		CAPN5	0.821311	2.62e-51	2.71697	0.347	7.30374	9.7e-13	0.642552	8.77938	2.35933	1.99816	1.16971	0.517996	0.92324	0.768039
		CAPN7	0.806083	0.307953	0.964598	0.0818	0.879568	0.82	0.991418	0.998525	0.653641	1.23566	1.07501	0.281353	1.08506	0.192006
		CAPNS1	1.11265	0.0145461	1.28165	0.415	1.28162	0.015	0.918361	1.60088	1.08091	1.42386	1.00574	0.945651	1.09905	0.0627947
		CAPRIN1	0.784584	2.63e-05	0.599986	0.0221	0.679586	1.3e-08	1.00548	0.64546	0.566007	0.513788	0.933204	0.0345955	0.856257	4.50046e-08
		CAPRIN2	0.966606	0.178051	1.2492	0.872	1.21375	0.12	1.24867	2.1569	1.35468	0.49615	1.16015	0.147217	0.865157	0.156931
		CAPS2	1.20414	0.945067	0.675955	0.633	0.968511	0.23	1.18235	0.342208	1.00933	0.44679	1.36321	0.238236	0.841576	0.566132
		CAPZA1	1.02456	0.000333081	0.957935	0.879	0.708126	0.76	1.13103	1.27075	1.11439	1.17318	0.959762	0.409804	0.858798	3.98628e-05
		CAPZA2	1.02954	0.00429197	1.08298	0.868	1.3591	0.57	1.01444	1.67489	1.04717	1.24728	0.871025	0.0183826	0.751102	5.26732e-08
		CAPZB	1.08298	1.79e-13	1.22774	0.532	1.86863	0.033	0.979599	1.72549	1.08878	1.34329	0.955092	0.421424	0.955035	0.400221
		CARD10	3.59004	6.29e-13	7.87347	0.000523	9.63889	1.2e-10	1.10668	18.4048	17.581	42.4982	0.96911	0.834772	1.21563	0.0459867
		CARD19	0.745355	1.11e-09	1.94261	0.177	2.6566	8.1e-05	0.784824	3.67685	2.40593	1.98535	0.873194	0.33142	0.833307	0.149691
		CARD8	1.00347	4.11e-05	0.608783	0.984	0.66123	6.8e-07	1.06484	0.641506	0.894002	0.922376	0.922163	0.401613	0.748854	8.8835e-05
		CARD9	0.89131	0.00901197	1.05629	0.772	1.91066	0.89	1.03511	1.03479	2.0029	3.12601	0.983374	0.940983	5.42749	7.44828e-60
		CARF	0.900002	0.058596	1.12506	0.756	1.5473	0.7	1.2584	0.640499	1.30211	1.27286	1.43709	0.0536383	0.920993	0.754113
		CARHSP1	0.923382	0.00030401	0.664343	0.567	0.704259	2.1e-05	0.829583	0.36551	0.328466	0.461492	0.979324	0.887628	0.753533	0.00185789
		CARM1	0.81169	0.0822799	0.75106	0.094	0.818535	0.0088	0.904051	1.27671	0.668135	0.572499	0.97043	0.604206	1.01961	0.744547
		CARMIL1	1.60547	0.00566385	1.24747	0.000472	0.688919	0.13	1.20914	1.34015	0.902383	2.39346	1.15667	0.265696	0.861149	0.244582
		CARMIL2	0.807201	0.324019	1.02172	0.382	0.803138	0.95	1.11651	1.05596	0.477694	5.1239	1.13543	0.531179	1.25536	0.17412
		CARNMT1	0.610897	0.00954475	0.934327	0.00304	0.664848	0.76	0.688138	1.03275	3.20479	1.58887	0.999427	0.995644	0.764841	1.35441e-05
		CARS1	1.30405	0.261692	1.32869	0.0354	1.15721	0.014	0.980531	1.55545	1.6661	0.65363	0.875486	0.024559	1.10395	0.100978
		CARS2	1.05848	0.000238566	1.01185	0.715	0.685961	0.95	0.779422	1.088	0.936556	1.1648	1.11888	0.131018	1.04983	0.578565
		CASC3	0.806083	0.208249	0.85441	0.0702	0.862826	0.18	0.961754	0.865435	0.948156	0.916363	0.865184	0.000348011	0.946533	0.250134
		CASD1	1.14314	0.0178854	1.09126	0.451	1.38086	0.62	0.954766	1.37806	1.08604	1.27009	1.34522	0.00593519	0.81559	0.0854254
		CASK	0.976032	0.0425427	1.37936	0.914	1.32819	0.02	0.966934	1.12767	1.53388	1.03148	1.14425	0.139393	1.04537	0.69579
		CASKIN2	0.743291	0.294371	1.21335	0.0505	0.849882	0.19	0.905749	1.00665	0.910398	1.03811	0.897655	0.174305	0.991146	0.93854
		CASP2	0.906262	9.59e-06	0.765248	0.528	0.617776	0.023	0.99288	0.872727	0.644703	0.92366	0.850033	0.000849503	0.73623	1.56181e-11
		CASP3	1.1479	2.79e-27	1.71713	0.28	2.69885	1.6e-08	1.10519	1.69374	2.08075	3.60285	0.789176	0.00143	0.768846	0.000296541
		CASP6	1.11651	0.120284	1.15189	0.506	1.22807	0.33	0.985279	1.14968	0.45636	0.417699	1.32415	0.0246108	0.957767	0.81665
		CASP7	1.01889	0.77027	1.09429	0.914	1.04476	0.49	1.01714	0.637392	0.795163	0.5272	0.990549	0.945554	0.806812	0.00865505
		CASP8	0.921464	0.228959	0.78404	0.639	0.846763	0.061	1.15827	1.2432	0.701958	1.02458	0.917538	0.598869	1.10498	0.502598
		CASP8AP2	1.03311	0.000237157	0.637722	0.858	0.667741	4.1e-05	1.00694	0.645088	0.406987	0.423215	0.995384	0.96272	0.937547	0.338517
		CASP9	1.24747	0.0659563	1.30677	0.351	1.42971	0.2	0.966594	1.29227	1.09964	2.04363	0.880449	0.392997	1.01013	0.959736
		CAST	1.24401	9.87e-13	1.26313	0.0526	1.91503	0.023	0.872371	2.8077	0.929098	1.31698	1.26787	3.50284e-05	0.782051	2.44979e-05
		CASTOR2	1.18181	1.78e-05	2.57398	0.373	1.79361	4.7e-13	0.964161	0.82386	0.892997	1.13823	0.941169	0.624926	1.04914	0.700504
		CASTOR3	1.18838	0.00291272	1.74231	0.546	1.8146	0.0067	1.10588	0.806862	0.828504	0.95357	1.08966	0.704991	0.745163	0.086486
		CASZ1	1.33515	0.70693	1.72788	0.466	1.16819	0.083	1.16607	1.45427	0.852253	0.56289	1.01992	0.935802	1.50685	0.00280569
		CAT	1.41128	1.08e-05	1.58447	0.00742	1.65066	6.7e-05	1.09984	1.04325	1.27856	0.981529	1.17414	0.0926091	0.747817	0.00077771
		CAV1	0.983502	2.26e-39	0.541488	0.93	0.273717	2.2e-09	1.0036	0.510749	0.304653	0.931975	1.20197	0.295442	1.40722	0.0200197
		CAV2	0.708088	3.03e-39	0.630689	0.00663	0.245873	5.4e-05	1.16646	0.633619	0.398371	2.10056	1.15945	0.440683	0.932546	0.749475
		CAVIN1	1.24229	2.7e-08	1.85446	0.121	1.85696	3.3e-08	1.02187	6.69521	1.85299	10.9565	0.915525	0.513713	0.811897	0.0525405
		CAVIN4	0.817335	0.179939	0.842647	0.552	0.691747	0.6	0.841728	0.425508	0.535926	0.2753	0.835289	0.448853	0.758719	0.185687
		CBARP	0.927231	8.69e-09	1.68646	0.759	2.30886	0.00075	0.781328	1.29463	0.999272	8.19263	0.852024	0.247374	1.38306	0.00350045
		CBFA2T2	1.07624	0.553773	1.1704	0.733	1.11588	0.36	1.09506	0.981977	0.728188	0.920192	0.994742	0.970061	1.17173	0.0502199
		CBFB	0.529976	0.345476	0.607097	1.05e-08	0.880363	4.1e-06	0.923669	0.660855	0.674809	1.01424	0.602362	2.7903e-27	0.798193	6.09253e-06
		CBL	0.838568	2.36e-07	0.733567	0.147	0.606299	0.0024	0.971982	0.986667	0.535641	0.603481	1.01857	0.814141	0.822951	4.3469e-05
		CBLB	1.46307	1.27e-11	2.85799	0.00687	2.24941	6.1e-19	1.11667	1.76684	2.15956	1.55632	1.24641	0.0653049	0.889772	0.401928
		CBLL1	0.95396	0.223887	0.957935	0.82	0.834672	0.83	1.03908	0.888812	0.888025	0.819688	0.877551	0.122283	0.941272	0.533062
		CBR1	0.828171	0.965522	0.880259	0.221	0.990261	0.41	0.924265	1.46143	0.623175	0.557241	1.04423	0.712528	0.822347	0.0171401
		CBR4	1.13997	0.189873	0.963262	0.426	1.20056	0.84	1.05727	0.809867	0.446305	0.478426	1.24904	0.00512932	0.751312	0.000266739
		CBS	0.855595	0.00144941	0.821311	0.584	0.519129	0.44	0.943774	0.724942	0.466381	0.512994	0.948592	0.565568	0.802176	0.000776749
		CBSL	0.889459	0.00129246	0.848508	0.719	0.489412	0.57	0.854017	0.62722	0.412758	0.41257	0.865182	0.205213	0.86691	0.196345
		CBWD1	1.17772	0.586142	1.07699	0.339	0.907929	0.69	1.01131	0.86806	1.15127	0.5014	1.06106	0.611759	1.0038	0.979425
		CBWD2	1.13603	0.430926	1.09278	0.434	1.12689	0.58	0.901186	0.841659	0.978569	0.651595	1.14926	0.0665271	1.19461	0.0115138
		CBWD5	1.00139	0.996847	0.900626	0.995	0.998963	0.61	0.801006	1.29209	0.835606	0.759927	1.11979	0.367894	1.15546	0.202147
		CBX1	1.00208	0.080634	1.05409	0.99	1.20971	0.71	0.95314	0.670455	0.540944	0.592368	0.992688	0.909021	0.839251	1.27492e-06
		CBX2	0.684916	8.26e-06	0.61132	0.00252	0.604206	1.6e-05	0.860769	0.389606	0.262788	0.470482	1.16332	0.000982778	0.660829	4.86879e-22
		CBX3	1.11574	0.981137	0.997923	0.419	1.00427	0.99	0.958551	0.915844	0.946105	0.705315	0.96625	0.428282	0.810694	7.88392e-12
		CBX4	0.721464	0.926193	1.2201	0.0219	1.02012	0.16	0.906633	0.820897	1.31739	1.59831	0.693117	6.4176e-10	0.750254	2.16912e-06
		CBX5	0.96929	0.0242628	0.82245	0.856	0.779362	0.091	0.984559	0.671303	0.610752	0.778396	0.902401	0.00269417	0.826391	1.26913e-09
		CBX6	0.46684	2.22e-25	0.793334	1.67e-15	0.384628	0.026	0.908122	0.63732	0.288344	0.189497	0.65289	3.35937e-45	1.01355	0.793188
		CBX7	0.800515	0.57842	1.38703	0.589	0.809197	0.34	1.19391	0.769809	0.738774	0.695551	1.02296	0.929259	0.755982	0.0908639
		CBX8	0.804408	0.620803	0.955945	0.23	0.907656	0.84	0.918804	0.569856	0.969709	1.18763	1.02498	0.868798	0.706205	0.000136289
		CBY1	1.00975	0.000248402	2.16445	0.974	1.77186	3.5e-07	1.20134	1.36724	1.56907	0.883897	1.09908	0.515354	1.15306	0.257602
		CC2D1A	0.761544	0.52712	1.21419	0.0499	0.905768	0.15	0.965177	0.962416	0.676279	0.881363	0.845978	0.00296316	0.885517	0.0370312
		CC2D1B	0.782954	0.716412	0.784584	0.0724	1.06184	0.054	0.992519	1.54079	0.585209	1.44662	0.950056	0.551324	1.0979	0.185611
		CC2D2A	0.855595	8.19e-05	0.850274	0.367	0.598575	0.3	0.870479	0.681844	0.655682	1.67926	1.12285	0.500264	1.0405	0.843786
		CCAR1	1.337	0.0143126	0.935623	0.00535	0.782814	0.61	1.05744	0.779365	0.73089	0.564138	0.979863	0.729056	0.855633	3.03843e-05
		CCAR2	1.05044	0.573006	0.948684	0.752	0.927545	0.71	0.887704	0.700175	0.833359	0.861703	1.03472	0.658828	0.82689	0.000296514
		CCDC102A	0.91955	0.153895	1.18017	0.758	0.753856	0.45	0.882211	0.974654	0.929127	1.8304	0.915161	0.545284	0.94901	0.737516
		CCDC106	0.84792	9.22e-05	0.722465	0.289	0.623833	0.011	0.967106	0.417902	0.58866	0.634264	1.09422	0.414356	1.30449	0.0014276
		CCDC112	1.31768	0.875108	1.40737	0.105	0.964489	0.024	1.02248	1.37849	0.681705	0.418058	1.14996	0.2896	0.971899	0.870427
		CCDC113	1.05555	0.000370807	1.69702	0.862	1.90387	0.0051	1.57362	1.03283	3.32343	1.06999	1.23118	0.18426	1.28401	0.0835533
		CCDC115	0.693035	0.0736642	1.3765	0.0201	1.30265	0.026	0.793702	0.719954	0.678756	0.546591	0.943822	0.679661	0.889242	0.31136
		CCDC117	1.32593	5.75e-14	0.866337	0.0251	0.444066	0.29	1.02723	0.479733	0.492461	0.348172	1.13434	0.00267293	0.730956	4.03156e-16
		CCDC12	0.951318	0.584989	1.03814	0.85	0.889316	0.88	0.898217	0.879659	0.872472	1.04885	0.808767	0.00417378	0.822716	0.00846855
		CCDC120	0.990343	0.322068	0.922742	0.975	0.813129	0.75	0.872521	0.692084	0.653138	0.99968	0.932517	0.555197	0.857577	0.106242
		CCDC124	0.797745	0.943305	0.880259	0.17	1.01677	0.46	0.840771	0.919087	0.807228	0.517201	0.839378	0.000101754	1.02757	0.672136
		CCDC125	1.07998	0.000106707	0.903753	0.752	0.536295	0.65	0.988261	0.682935	0.558684	0.776107	0.814041	0.0322861	0.902142	0.344709
		CCDC126	1.09429	0.000114988	1.8	0.74	1.91515	0.00066	1.12813	1.1901	1.63256	1.14503	0.643155	0.010642	0.641999	0.00951289
		CCDC127	0.963262	0.194044	1.13288	0.846	1.19059	0.39	1.02777	1.2868	1.16272	1.23185	0.967864	0.810333	1.03471	0.79046
		CCDC130	0.990343	0.972231	1.06585	0.965	0.991935	0.72	0.88643	1.06268	1.11737	1.10988	0.867579	0.136946	0.974849	0.843892
		CCDC134	0.951978	0.0970206	0.653383	0.835	0.768257	0.0044	0.994496	0.662504	0.860046	1.03294	0.978608	0.846422	0.771779	0.000139932
		CCDC137	0.950659	0.632002	0.972655	0.804	0.919802	0.89	0.764686	0.933001	0.333208	0.351021	0.984643	0.867818	0.853072	0.00520216
		CCDC138	0.817335	2.85e-12	0.532923	0.287	0.364718	2.3e-05	0.934128	0.45997	0.427097	0.48672	1.06745	0.466503	0.873852	0.0675603
		CCDC14	0.918276	2.17e-09	0.53108	0.653	0.479382	4e-07	1.30519	0.628974	0.573683	0.818302	1.17037	0.00665229	0.684668	3.81166e-13
		CCDC142	0.731536	0.941771	1.03383	0.185	0.976359	0.92	1.08684	1.04848	0.723259	0.524875	0.776077	0.0006276	0.940026	0.521627
		CCDC15	0.819605	0.425059	0.594604	0.545	0.792375	0.043	1.0224	1.15546	0.793349	0.556729	1.10202	0.649764	0.964879	0.883009
		CCDC150	0.987601	0.00213391	0.532923	0.969	0.581518	0.00039	1.15507	0.704573	0.279314	0.298228	1.00816	0.951064	1.0676	0.506389
		CCDC157	1.27103	0.025012	1.64262	0.571	1.9758	0.13	1.05623	0.828876	0.979584	0.650402	1.26962	0.353099	1.29902	0.278434
		CCDC167	0.949342	0.467935	1.68763	0.844	1.15913	0.00094	1.00591	1.32319	0.801059	0.626618	0.614678	8.59731e-07	0.942784	0.684401
		CCDC171	0.790589	1.67e-22	0.527777	0.13	0.299296	4.4e-07	0.972445	0.305236	0.382879	0.246066	1.1311	0.711215	0.800528	0.444963
		CCDC174	1.25527	0.628465	1.07177	0.132	0.919494	0.7	0.993272	0.956731	1.13549	0.858307	0.891866	0.286414	1.06454	0.592919
		CCDC18	1.18263	5.74e-05	0.696406	0.314	0.593473	0.008	1.15566	0.779934	0.752752	0.532169	1.22245	0.0130074	0.837574	0.0331291
		CCDC181	0.78187	0.0884584	0.477973	0.508	0.604098	0.011	0.880233	0.229277	0.592056	0.396973	0.849426	0.245146	1.24436	0.074428
		CCDC186	1.12896	0.0125057	1.40542	0.55	1.44611	0.024	1.24152	1.37686	1.42807	1.65111	1.035	0.799625	0.690757	1.12624e-05
		CCDC22	0.875998	0.410219	0.853226	0.506	0.86351	0.37	0.941689	1.02564	0.693264	0.817213	0.88387	0.255964	0.876834	0.200224
		CCDC24	0.747943	0.0316465	1.46917	0.374	1.70081	0.15	0.8384	1.26296	1.03565	1.37115	1.27641	0.385597	0.961163	0.915943
		CCDC25	1.30949	0.824157	1.07549	0.0185	0.965834	0.6	1.20506	0.719852	2.6057	3.1447	1.08799	0.402099	0.812925	0.0113294
		CCDC28A	1.1321	0.851687	1.48041	0.646	0.947437	0.043	0.939084	0.891377	0.627789	0.492894	0.883688	0.300255	0.861581	0.179087
		CCDC28B	0.675955	0.661197	0.898755	0.0669	1.11436	0.67	0.946322	0.674403	1.36096	0.90924	0.895912	0.446082	1.61121	1.9754e-06
		CCDC3	1.54864	0.0201638	0.867539	0.123	0.541487	0.68	0.815707	1.03791	0.571125	1.20562	1.10608	0.659939	0.944532	0.817502
		CCDC30	1.56699	0.407239	1.44093	0.161	0.752654	0.24	1.54622	0.644642	2.16272	0.56417	1.06012	0.886869	1.76708	0.0232679
		CCDC32	0.906262	0.956418	1.0367	0.776	1.02105	0.92	0.901662	1.26024	1.92226	1.32777	0.910986	0.665458	0.730325	0.0522145
		CCDC34	1.21672	0.571529	0.706127	0.0883	1.07672	0.00042	0.929077	0.456417	0.406546	0.31288	1.05217	0.623459	0.910097	0.281331
		CCDC43	1.13053	0.392742	0.554785	0.57	0.850068	0.00019	1.02397	0.654499	0.672106	0.779547	1.01738	0.892685	0.947995	0.61727
		CCDC47	1.08073	0.263603	0.795536	0.574	0.880445	0.026	1.10062	1.21931	1.18263	1.05075	0.938232	0.164758	0.841439	4.26462e-06
		CCDC50	1.02669	0.00958309	0.862144	0.898	0.720368	0.31	1.23563	1.73499	0.46509	1.43374	0.868286	0.0898391	0.950909	0.621163
		CCDC51	0.863938	0.433839	0.808321	0.528	0.85002	0.28	0.998264	0.788293	0.789908	0.51064	0.990572	0.9461	0.862904	0.0914585
		CCDC57	0.655197	0.0372968	0.922103	0.0148	0.710166	0.71	0.912403	1.12738	1.45356	1.01092	0.830957	0.00207265	0.866471	0.0201883
		CCDC58	1.05117	5.93e-10	0.669428	0.822	0.438522	0.0049	0.905568	0.633028	0.695583	0.565488	1.00835	0.953613	1.05594	0.626634
		CCDC59	1.264	0.173369	0.769504	0.0741	0.839462	0.03	0.996195	0.694625	0.729714	0.719662	0.906025	0.223867	1.18458	0.0131629
		CCDC6	0.835088	0.415707	1.32961	0.186	0.893368	0.013	1.03782	1.33302	1.07699	0.835857	1.13038	0.044361	0.954483	0.531048
		CCDC61	0.812252	0.00229829	0.90689	0.412	0.55298	0.71	0.863922	0.984507	0.523282	0.358816	0.869504	0.581527	1.26376	0.260615
		CCDC65	1.06437	0.162611	1.50316	0.877	1.45642	0.13	1.06718	0.966516	2.90793	2.14504	0.864369	0.56718	0.779311	0.24985
		CCDC66	1.23542	0.0315012	0.860949	0.358	0.663784	0.52	1.08547	0.659841	0.925856	0.515713	0.968637	0.728738	1.13285	0.0529962
		CCDC71	0.41151	0.0653094	0.852635	4.82e-05	0.666893	0.55	0.857769	1.17559	0.702206	1.03484	0.870164	0.121648	0.782553	0.00197815
		CCDC71L	1.37268	2.33e-10	1.51887	0.0211	2.06283	0.00061	0.9442	2.311	2.05973	2.95266	1.07872	0.605964	0.874901	0.285227
		CCDC74A	0.774856	0.000367156	1.85832	0.385	2.08138	0.0037	1.38667	0.643593	1.21336	0.776145	1.17999	0.212054	1.26048	0.0489661
		CCDC77	1.03814	0.238592	0.665726	0.846	0.851284	0.00061	1.0252	0.723865	0.368585	0.241445	1.00505	0.97369	0.938909	0.573492
		CCDC8	0.383155	0.000187144	0.736113	1.02e-12	0.609291	0.031	0.790794	0.787725	0.25699	0.329667	0.785416	0.000974453	0.7957	0.00172075
		CCDC80	0.975355	0.975104	5.25977	0.938	0.989358	1.3e-24	0.930713	10.1267	3.92317	49.0153	1.22792	0.436227	1.36457	0.171989
		CCDC82	1.07998	0.528195	0.938872	0.605	1.08892	0.66	1.13096	1.62877	1.14361	1.68968	1.0543	0.627121	0.765691	0.000480384
		CCDC85B	0.625898	0.900247	1.00765	0.00306	0.970226	0.97	0.835238	1.55527	1.09688	1.01704	0.803172	0.00265567	0.86431	0.057682
		CCDC85C	0.877822	0.423526	1.00975	0.549	1.1668	0.97	0.949134	1.54271	1.29698	0.620117	1.02792	0.7629	0.838487	0.00342719
		CCDC86	0.815637	0.243419	0.558644	0.171	0.846533	9.8e-07	0.763899	0.905718	0.546065	0.487739	0.848531	0.00233084	1.21736	9.80692e-05
		CCDC88A	0.905634	0.679821	0.746907	0.514	0.939016	0.0094	1.14777	1.19039	0.75981	0.913839	0.98056	0.854782	0.953811	0.589669
		CCDC88C	1.04319	0.822001	0.759962	0.818	0.961607	0.024	0.855508	0.933747	1.15384	0.5569	1.27373	0.015558	1.33606	0.00217581
		CCDC9	1.13367	0.407724	1.03383	0.55	0.856852	0.89	0.872332	1.42993	0.876314	1.72598	0.868232	0.235769	1.05338	0.712538
		CCDC90B	1.27015	2.9e-09	1.2605	0.0459	1.79281	0.037	0.94644	1.43716	0.504043	0.461697	1.12866	0.262007	0.994306	0.970611
		CCDC91	1.67714	0.744512	0.83915	0.000163	1.06475	0.27	1.07364	1.12331	1.1411	0.843271	1.36613	0.00241573	1.00791	0.965501
		CCDC92	1.11497	0.0789156	1.48144	0.468	1.23295	0.00029	0.996065	2.08232	1.35822	1.91401	1.08047	0.552968	1.02654	0.861405
		CCDC93	0.981459	0.141642	1.19416	0.919	1.19283	0.14	1.00593	1.72326	0.880241	0.781792	0.887592	0.0528721	0.684942	5.50708e-13
		CCDC97	0.820173	0.184113	0.786762	0.127	0.848563	0.039	0.928296	0.849377	0.416575	0.835204	0.903547	0.144348	0.849713	0.00799502
		CCHCR1	0.662963	4.37e-06	0.516557	0.00169	0.580878	2.3e-08	0.951938	0.686731	0.309644	0.482682	1.11537	0.159363	1.28655	7.81649e-05
		CCM2	0.724973	0.997603	1.19499	0.0547	0.999384	0.3	0.935641	1.99268	1.14388	1.45335	0.77752	0.0130728	0.84129	0.104986
		CCN1	3.21986	6.63e-35	9.42832	1.34e-26	3.6882	1.5e-102	1.24416	8.88602	4.03823	37.7873	0.998106	0.992335	1.53098	1.49469e-05
		CCNA2	1.24229	0.468952	0.742776	0.106	1.11089	0.012	1.01394	0.355067	0.13479	0.242154	1.12658	0.0146718	0.875708	0.00535296
		CCNB1	0.757858	0.000704408	0.51086	0.00537	0.734504	4.8e-15	1.05574	0.557472	0.14752	0.209196	0.844848	1.44207e-05	1.10339	0.0163693
		CCNB1IP1	0.946058	0.0480712	0.678302	0.733	0.798492	0.00025	1.01484	0.472194	0.631309	0.464624	0.764959	6.02759e-06	1.34679	1.16051e-07
		CCNB2	1.08298	0.0786277	0.670821	0.568	0.828551	3.7e-05	1.03309	0.533943	0.193608	0.363599	1.0357	0.67827	1.10903	0.100578
		CCNC	0.57995	0.415558	0.820742	1.69e-05	0.882985	0.15	1.23601	0.541009	0.655508	0.661677	0.612328	2.13219e-14	0.872947	0.070266
		CCND1	0.738669	3.54e-36	0.358986	0.023	0.256662	9.5e-21	0.90625	0.529903	0.120169	0.0700299	0.757561	0.000902886	1.71006	1.68247e-13
		CCND3	0.770571	0.308449	0.523405	0.0743	1.16274	1e-07	0.933399	0.964422	1.14721	1.37423	0.995062	0.965196	0.97097	0.751511
		CCNDBP1	1.25093	6.99e-08	1.14949	0.113	1.83036	0.34	1.05441	2.58693	1.23044	1.20386	0.976835	0.869391	0.925582	0.495521
		CCNE1	0.901875	0.0241929	0.97942	0.727	0.627456	0.95	0.568196	0.967667	0.48715	0.541687	1.00218	0.987204	0.942187	0.557646
		CCNE2	0.95	0.639034	0.606256	0.895	0.862147	0.051	1.15384	1.15618	0.272552	0.333865	0.787459	0.086231	0.618011	9.99764e-05
		CCNF	0.68968	2.25e-13	0.423666	0.00217	0.458333	1.1e-15	0.921931	0.549646	0.292643	0.32142	0.844553	0.00953859	0.900616	0.132688
		CCNG1	1.27544	0.000204861	0.583579	0.0634	0.659418	9.7e-07	1.0679	0.616838	1.10201	0.911305	1.09145	0.0357387	0.822612	9.2681e-08
		CCNG2	1.57243	1.3e-10	3.68841	0.00179	2.23511	4.8e-27	0.789188	1.41771	3.92779	1.65163	0.924817	0.488	0.771154	0.00227241
		CCNH	0.859756	0.00253751	0.701736	0.377	0.671015	0.0089	0.946025	0.835457	0.532448	1.06586	0.904509	0.355955	0.740079	0.000447616
		CCNI	1.56049	0.441968	1.23029	3.11e-06	0.91237	0.038	1.02475	1.28416	1.09716	1.24776	1.07202	0.118546	0.858235	4.6438e-05
		CCNJ	0.841479	0.239074	0.734075	0.267	0.845396	0.017	0.864287	0.717446	1.01177	0.581909	0.817641	0.00302552	0.88738	0.101882
		CCNJL	1.18017	0.122352	0.893785	0.56	0.704378	0.7	0.89989	1.4575	0.744705	1.01575	1.43732	0.194073	0.959306	0.919082
		CCNK	1.00417	0.159461	0.653836	0.989	0.76365	0.018	1.01152	1.12659	0.890996	0.787318	0.976668	0.899402	1.22035	0.101404
		CCNL1	1.87774	0.321882	1.17365	3.78e-11	1.12364	0.15	1.23115	1.5431	1.3296	3.09427	1.11575	0.0360876	1.14878	0.00435083
		CCNL2	1.06955	0.200746	1.69232	0.63	0.868934	6.5e-09	1.02937	1.36891	1.88887	1.29854	1.14655	0.00130573	0.710469	1.0187e-18
		CCNO	0.642603	0.681027	0.900002	0.0864	0.883992	0.73	1.33371	1.14841	0.75233	0.222958	0.970288	0.91234	0.702005	0.0494097
		CCNQ	0.954621	0.757167	1.02669	0.83	0.94165	0.9	0.930989	1.08152	0.825247	0.939201	1.07706	0.41093	0.868174	0.0627896
		CCNT1	1.18181	0.809344	0.848508	0.242	1.04246	0.22	1.18324	0.772537	0.746155	0.751178	1.06046	0.402027	0.829103	0.000491086
		CCNT2	0.913198	0.0997437	0.850274	0.616	0.798015	0.27	0.991555	0.935941	1.22959	1.25339	1.0152	0.872167	0.937378	0.3599
		CCNY	1.35004	0.756173	0.993092	0.00308	0.958042	0.97	0.989846	0.663267	1.0965	1.05492	1.15608	0.0326357	0.850619	0.0152815
		CCNYL1	0.969962	0.212716	1.84676	0.901	1.23119	1.1e-05	1.15279	2.85284	1.39941	1.62275	0.891628	0.380821	1.20737	0.0854231
		CCP110	0.74898	0.966991	0.535144	0.0682	0.989788	2.8e-06	1.13211	0.439218	0.52441	0.453877	0.963821	0.65118	0.921709	0.211488
		CCPG1	1.80625	5.76e-05	2.56863	6.34e-06	1.65918	2.4e-15	1.35048	2.77866	3.73003	3.16476	0.884826	0.668178	0.692739	0.093554
		CCS	0.762072	0.336026	1.45902	0.0876	1.1683	0.0057	0.902296	1.22916	0.622095	0.625451	0.983969	0.916717	0.73652	0.000936731
		CCSAP	0.753145	0.978765	0.849096	0.0585	1.00615	0.29	1.16124	0.653597	0.631651	0.414509	0.871539	0.0379993	0.854843	0.0133586
		CCSER2	1.05848	0.444677	1.01607	0.717	1.10432	0.93	1.36111	1.71286	1.40391	1.31713	1.07319	0.523567	0.985988	0.918219
		CCT2	0.908778	0.00141341	0.633756	0.517	0.712347	9.4e-06	0.996637	0.744415	0.503816	0.46351	0.910228	0.00606255	1.15565	3.15892e-06
		CCT3	0.623301	8.79e-05	0.624598	5.17e-06	0.675022	1.8e-06	0.963853	0.837511	0.526145	0.393741	0.815185	2.2341e-14	0.904815	0.00044553
		CCT4	0.812816	0.000619092	0.647521	0.0579	0.724641	2e-06	0.988041	0.817691	0.542817	0.533385	0.857906	1.51116e-06	1.08647	0.0146549
		CCT5	0.754713	0.000667024	0.565265	0.00963	0.715416	1.2e-09	0.943201	0.902482	0.57491	0.414441	0.867199	3.87443e-06	1.09696	0.00368656
		CCT6A	0.793334	0.00104561	0.566835	0.0329	0.73127	3.5e-10	0.998727	0.848836	0.666738	0.564181	0.843463	2.47238e-09	0.978094	0.589342
		CCT6P3	1.18591	0.684242	1.49381	0.693	1.17743	0.22	1.0106	1.21838	1.28846	1.05492	0.968412	0.92619	1.36953	0.154099
		CCT7	0.803294	1.65e-11	0.59378	0.0524	0.537575	2.5e-08	0.974247	0.832778	0.553216	0.366376	0.849421	4.15363e-09	1.11157	0.000209156
		CCT8	0.886382	0.00584904	0.634635	0.346	0.758397	1.7e-06	1.03455	0.790716	0.833357	0.497846	0.805066	1.64701e-13	1.08703	0.0102466
		CCZ1	0.970634	0.405105	0.863938	0.898	0.864885	0.4	1.08896	1.10463	1.13506	0.976314	1.00109	0.994776	1.0278	0.864709
		CCZ1B	1.00208	0.544139	0.984866	0.993	0.891537	0.95	1.32709	1.20954	1.04089	0.89428	0.975804	0.884386	0.881537	0.310616
		CD109	1.02669	0.381863	1.089	0.896	1.13896	0.6	1.13899	3.1068	0.899746	1.05367	1.11832	0.555197	0.784923	0.119244
		CD151	0.918913	0.000847857	1.64376	0.643	1.51032	4.1e-05	0.875738	2.57867	0.889614	2.30417	0.767722	1.18281e-06	0.838078	0.00193422
		CD164	1.10038	0.695855	1.28521	0.444	0.950091	0.0084	0.67787	1.18654	1.80793	1.94214	1.06588	0.160216	0.72864	1.73219e-18
		CD24	2.96083	6.23e-10	3.69353	1.94e-07	3.34757	2.3e-11	1.02583	11.5356	0.821335	3.00513	1.76835	0.0208385	1.05152	0.899191
		CD276	1.15509	4e-09	1.39474	0.324	1.87955	0.004	0.920066	2.82954	2.6611	1.99937	1.09453	0.0921975	0.877304	0.00772403
		CD2AP	1.18921	0.00104585	1.15509	0.283	0.654904	0.35	1.26785	1.13444	2.32723	2.10152	1.11785	0.0952789	0.884245	0.0560941
		CD2BP2	1.00069	0.788399	1.17365	0.997	1.04833	0.24	0.91803	0.926737	0.765382	1.16287	0.965189	0.540058	0.905725	0.0243543
		CD320	0.99585	0.532408	0.746907	0.985	0.903997	0.025	0.735368	0.776397	0.615043	0.296067	0.880939	0.0507762	0.986721	0.889697
		CD46	0.773246	0.314932	0.940174	0.0271	0.883761	0.67	1.15476	1.35364	2.02173	2.36309	1.17906	5.22e-05	0.674303	5.40069e-24
		CD47	1.19416	0.000452555	1.27721	0.156	1.43123	0.024	1.03443	1.915	2.10687	0.975698	1.14675	0.0222648	0.773295	3.04447e-06
		CD55	5.5251	1.55e-07	2.9465	1.41e-07	5.09824	0.0013	0.870051	13.1684	6.16775	1.27536	0.903199	0.236389	0.915747	0.304018
		CD58	1.69584	0.114661	1.50838	0.0172	1.41597	0.056	1.18986	2.45929	1.38895	0.950276	1.08738	0.730191	0.632184	0.00740801
		CD59	1.30586	6.93e-20	3.51129	0.101	3.19424	4.3e-23	1.02944	7.17144	3.64294	3.27942	0.981099	0.889003	0.842582	0.0539081
		CD63	1.08073	5.12e-19	2.32785	0.647	2.60126	5.6e-15	0.766256	2.99683	2.53675	3.15632	0.894767	0.0172833	1.0329	0.585119
		CD70	0.987601	7.82e-14	4.60755	0.982	6.18694	1.1e-09	0.979844	10.0518	6.74483	2.26054	1.08823	0.814141	1.31236	0.308525
		CD81	1.16797	1.25e-10	2.45547	0.277	1.97486	6.9e-18	0.919392	1.9887	1.77196	1.81595	0.992009	0.903687	0.984424	0.79098
		CD83	2.00277	0.0635037	0.497235	9.73e-07	0.749382	1.1e-06	0.929792	0.568731	0.293515	0.139669	1.22873	0.208833	1.19611	0.272639
		CD9	1.25527	1.87e-11	3.9834	0.406	3.51358	1.3e-13	0.865039	12.3147	4.9882	2.56292	0.896039	0.349278	0.895373	0.329605
		CD99L2	0.976032	7.31e-06	1.54542	0.896	1.6171	6.3e-05	0.86116	1.62368	1.3778	1.25384	1.09701	0.16356	0.86921	0.0193835
		CDADC1	1.29235	0.934947	1.05482	0.184	0.977859	0.83	0.992814	0.670586	0.775323	1.19801	1.05817	0.728738	1.46047	0.000241956
		CDAN1	0.660669	0.21875	0.764188	0.00496	0.826917	0.066	0.909743	1.04507	0.626563	1.29708	0.891342	0.3384	1.14866	0.201429
		CDC123	0.925304	0.112811	0.764718	0.573	0.843897	0.0072	0.933696	0.831708	0.795626	0.574052	0.888386	0.0399822	0.802768	2.01339e-05
		CDC14A	1.07103	0.811842	0.753667	0.837	0.929467	0.25	0.97815	1.0328	0.735081	0.645869	0.891179	0.542072	1.36215	0.0275684
		CDC14B	1.45902	0.0542164	1.56699	0.0341	1.38168	0.0049	1.37361	1.89277	1.49638	0.778281	0.785131	0.000292138	0.686923	4.14475e-09
		CDC16	0.834509	0.00492028	1.10496	0.142	0.745813	0.44	1.02533	1.07309	0.855156	0.816876	0.947355	0.539159	0.815824	0.00156737
		CDC20	0.774319	4.26e-13	0.51907	0.0107	0.539018	1.7e-14	0.938503	0.661985	0.119945	0.223274	0.809636	4.89627e-06	1.17154	0.000663377
		CDC23	1.1591	0.096783	0.746907	0.276	0.821983	0.0089	0.988149	0.744375	0.943489	0.9046	1.01468	0.868033	1.01786	0.830385
		CDC25A	0.99516	3.28e-16	0.498961	0.984	0.361568	4.8e-08	1.01199	0.621505	0.359095	0.288569	0.951002	0.245957	1.18831	1.74257e-07
		CDC25B	1.01326	0.569671	0.959264	0.941	0.926183	0.78	0.977497	0.688511	0.261591	0.207772	1	0.999989	0.81543	0.000165021
		CDC25C	0.869345	0.0178731	0.65022	0.469	0.703257	0.0033	1.03541	0.590154	0.190898	0.343752	0.771817	0.0108835	0.983382	0.917357
		CDC26	1.00069	0.235652	1.21841	0.997	1.26917	0.35	0.831293	0.780539	0.785209	0.675989	0.978611	0.914498	0.971492	0.882273
		CDC27	0.890076	0.000446367	0.651122	0.41	0.691005	4.1e-05	0.822675	0.843826	1.25099	1.13699	1.02609	0.666873	0.765369	2.01794e-12
		CDC34	1.07624	0.201985	1.31768	0.736	1.23102	0.074	0.867479	1.21535	0.63081	0.615523	0.940895	0.332022	1.10322	0.066411
		CDC37	0.71847	0.925226	0.865737	0.00577	0.982505	0.26	0.865975	1.22926	0.957463	0.77481	0.848332	4.46576e-06	0.920779	0.0348109
		CDC37L1	0.99654	0.819491	0.879649	0.988	1.04026	0.36	1.27005	0.954014	0.664447	1.30257	1.09276	0.673241	0.888737	0.540402
		CDC40	0.986917	8.52e-07	0.663423	0.948	0.570662	0.00052	0.902161	0.408526	0.339168	0.347412	1.00591	0.961627	0.789589	0.000502286
		CDC42	0.915734	6.51e-10	1.05702	0.479	1.69855	0.66	0.899508	1.61119	0.993424	1.21313	0.889397	0.00157387	0.809615	6.53223e-10
		CDC42BPA	1.13997	0.0476996	1.45095	0.375	1.26743	0.0009	1.09442	2.1477	1.60698	1.32844	1.08319	0.160216	0.875692	0.00799828
		CDC42BPB	0.833353	2.49e-05	0.667112	0.201	0.620516	0.00047	0.951682	1.10697	0.964277	0.978293	1.05105	0.555171	1.17582	0.00803874
		CDC42BPG	0.636839	0.019881	0.911933	0.0345	0.635841	0.73	0.769423	0.510491	0.556233	0.806879	1.84363	0.00162258	1.69557	0.00683309
		CDC42EP1	0.81169	0.0873066	5.63338	0.569	1.57148	1.5e-15	0.753633	16.1927	5.39692	3.89246	0.928938	0.128477	0.952725	0.346043
		CDC42EP3	1.43993	9.87e-30	3.31498	0.00384	3.2991	8.9e-30	1.14754	12.3752	3.59463	14.8362	1.12738	0.424925	0.82834	0.158005
		CDC42EP4	1.39765	8.25e-23	1.44693	0.00685	2.77058	0.0012	0.854451	2.37269	2.21019	2.39586	1.11503	0.2705	0.692837	3.94604e-06
		CDC42SE1	0.853818	0.369255	0.890693	0.29	1.1367	0.43	0.754461	0.9496	0.674254	1.223	0.819694	0.000335825	0.757875	1.89112e-07
		CDC42SE2	1.36699	2.99e-14	0.695923	0.0107	0.445205	0.0014	1.27563	0.826537	0.61052	0.276265	1.04104	0.764425	0.922307	0.473133
		CDC45	0.791686	9.59e-10	0.454074	0.109	0.488951	1.9e-11	0.975429	0.576178	0.081696	0.207581	0.952364	0.399604	0.930441	0.154157
		CDC5L	1.02456	0.377025	0.64038	0.882	0.899254	2.9e-06	1.02057	0.715449	0.525722	0.68371	0.947137	0.315953	1.43044	1.21351e-20
		CDC6	0.730016	1.61e-17	0.722966	0.0104	0.409661	0.0042	0.844394	0.657862	0.314506	0.436041	0.919667	0.0614594	1.12239	0.0043953
		CDC7	1.00417	0.000577526	0.584389	0.985	0.648803	1.6e-05	1.27084	0.490655	0.476265	0.691622	1.15363	0.00116891	0.809198	4.87621e-07
		CDC73	0.780245	0.410487	0.744323	0.0386	0.89832	0.0062	0.939062	1.08503	0.965998	1.32828	0.894702	0.060352	0.852998	0.00349509
		CDCA2	0.905006	0.00815421	0.450313	0.587	0.705154	1e-10	1.13085	0.617451	0.177287	0.245864	0.857247	0.068847	1.31138	0.00019477
		CDCA3	0.685867	1.1e-06	0.546768	0.00255	0.579334	7.4e-08	0.988991	0.673416	0.189465	0.178142	0.880822	0.0773393	0.839229	0.00810714
		CDCA4	0.879649	0.100205	0.452503	0.513	0.774902	6.8e-09	0.728678	0.884412	0.386229	0.425605	0.942502	0.466784	0.810604	0.000582008
		CDCA5	1.02456	0.038134	0.493116	0.894	0.784969	1.1e-11	0.884063	0.664776	0.12561	0.244354	0.920672	0.0751607	0.983194	0.787508
		CDCA7	0.855595	1.23e-29	0.549808	0.279	0.298898	5e-08	1.00587	0.74605	0.257845	0.582982	1.14896	0.000476408	0.735522	2.69817e-16
		CDCA7L	0.852044	0.0712908	0.63905	0.347	0.774512	0.00065	0.844022	0.955309	0.440771	0.608877	1.22023	0.0103349	0.859275	0.0661834
		CDCA8	0.676893	3.39e-15	0.592546	0.000255	0.471238	9.1e-08	0.958766	0.597327	0.141933	0.272416	0.855229	0.00488248	1.0674	0.31136
		CDH2	1.58557	5.2e-82	3.18877	2.18e-06	5.20113	2.3e-40	0.975604	5.41396	2.06242	0.452108	1.09762	0.102991	0.828549	0.000168416
		CDH23	0.790589	2.16e-15	0.360232	0.132	0.377822	1.3e-16	0.824864	0.226526	0.20519	0.353221	1.36781	0.0800817	2.19577	7.99002e-08
		CDH24	1.04319	0.771554	1.20581	0.799	0.956292	0.11	0.976142	0.831657	0.936943	3.72258	1.34822	0.00551294	0.940871	0.692738
		CDH4	1.6449	3.28e-05	0.581963	0.000832	0.560403	0.00013	0.968394	0.769468	0.449523	0.211448	1.3099	0.324462	0.853769	0.609121
		CDHR3	1.08222	0.0590791	1.23114	0.733	1.35447	0.24	0.994733	0.714216	0.987558	0.815382	1.12952	0.684313	1.08545	0.791034
		CDIN1	0.770037	0.835002	1.20164	0.305	0.939734	0.45	1.09588	1.31368	0.681296	1.04177	0.967433	0.879054	1.12775	0.474553
		CDIP1	1.35097	0.41784	1.45902	0.0448	1.14186	0.0046	0.865887	1.30141	0.402089	0.882594	0.959587	0.628103	1.27177	1.82561e-05
		CDIPT	0.824162	0.00471097	1.04899	0.171	1.39282	0.78	0.914637	1.60019	1.03874	1.17901	0.902274	0.108383	0.950368	0.484126
		CDK1	1.21419	2.14e-06	0.575545	0.11	0.624245	2.2e-08	1.25572	0.597699	0.189512	0.314566	0.97089	0.6453	0.690135	1.57484e-19
		CDK10	0.992404	0.445418	0.868742	0.973	0.89123	0.33	0.845083	0.910757	0.606819	0.856884	1.04473	0.591584	0.65218	4.56006e-15
		CDK11B	0.96393	0.935991	1.03958	0.856	0.982944	0.84	0.912844	0.980898	0.779222	0.983507	0.931521	0.291525	0.991224	0.923789
		CDK12	0.971307	0.0518197	0.667574	0.876	0.788105	0.00042	1.01575	0.892936	0.590215	0.951663	1.07647	0.265369	0.866499	0.00905039
		CDK13	1.0324	0.975104	0.840896	0.852	1.0062	0.15	1.05545	0.870203	0.911206	0.880205	0.95326	0.494798	0.82754	0.000223955
		CDK14	1.24833	0.074769	1.02883	0.0659	1.22297	0.86	1.06809	1.13758	0.637731	0.666164	1.38247	0.00120246	1.17384	0.15915
		CDK16	1.00208	0.367862	0.936272	0.991	0.89045	0.65	0.924233	1.18382	0.956165	0.825502	1.05318	0.226096	0.898053	0.00240081
		CDK17	1.50733	4.5e-12	0.819037	0.000354	2.02357	0.11	0.738589	2.01582	1.27003	1.40908	1.01697	0.904698	0.81345	0.0188544
		CDK18	0.887611	2.85e-08	3.19541	0.6	2.22682	1.3e-16	0.701611	1.38674	2.74499	2.71006	1.14674	0.374502	0.896083	0.492406
		CDK19	1.16797	8.21e-12	1.60882	0.354	2.25362	0.00016	1.30007	1.11149	1.06215	1.29776	0.989243	0.94737	1.00132	0.994434
		CDK2	0.908778	0.000288702	0.615572	0.517	0.681779	3.3e-06	0.745865	0.765375	0.191983	0.518781	1.07456	0.305925	0.735044	1.7315e-08
		CDK20	1.01255	0.197643	1.3435	0.965	1.26016	0.087	0.998534	1.10514	1.50175	0.953241	0.921814	0.586041	0.779921	0.0281569
		CDK2AP1	1.20916	3.2e-19	1.70882	0.101	2.25018	9.5e-09	0.809682	2.33586	1.30298	1.15421	1.1183	0.15698	0.998688	0.992379
		CDK2AP2	1.01748	0.528397	2.41496	0.936	1.10813	2.8e-14	0.91085	2.25756	1.93384	1.16896	0.716231	3.83237e-05	1.13901	0.155996
		CDK4	0.909408	0.00114953	0.474671	0.572	0.680008	3.6e-11	0.899325	0.853017	0.589355	0.72507	0.967688	0.566869	0.798937	6.44637e-09
		CDK5	0.904379	0.000643898	1.18345	0.59	1.54379	0.27	0.979334	0.58592	0.679008	0.529696	1.15435	0.074822	0.909416	0.278979
		CDK5R1	1.28165	0.710729	1.27544	0.382	1.12048	0.36	0.756739	0.841012	0.633883	0.86142	1.0417	0.762709	2.37676	2.42213e-31
		CDK5RAP1	1.08373	0.0107199	0.704172	0.62	0.743836	0.0022	1.00567	0.796016	0.697783	0.689846	1.0329	0.741298	0.879212	0.0666459
		CDK5RAP2	0.931095	5.12e-12	0.612168	0.621	0.524013	3e-07	1.06276	0.621957	0.504412	0.523778	1.03082	0.649012	1.18998	7.69737e-05
		CDK5RAP3	0.74898	0.537069	1.05555	0.298	0.841141	0.87	0.951999	1.12182	1.33874	0.84531	0.996376	0.986108	0.601118	1.21352e-05
		CDK6	0.976032	4.26e-10	1.79253	0.971	8.25698	0.15	1.09302	2.33921	2.72091	4.8492	0.839166	0.00313535	0.677428	8.04211e-13
		CDK7	1.09429	0.0036923	1.36415	0.572	1.38752	0.0066	0.971904	1.67772	1.47741	0.886911	0.885888	0.295085	1.03221	0.827382
		CDK8	0.890076	1.84e-07	0.699793	0.535	0.506997	0.011	1.00648	1.05697	1.0386	0.988284	0.980006	0.873801	1.06949	0.501013
		CDK9	0.70466	0.780928	0.971307	0.0147	0.948313	0.88	0.940001	0.989941	0.55919	0.614794	0.969997	0.778631	0.889851	0.136813
		CDKAL1	0.89131	5.63e-05	0.544499	0.535	0.589991	3.5e-06	0.971053	0.59603	0.558928	0.726166	0.928602	0.563398	1.05244	0.697449
		CDKL1	0.862741	0.128664	0.803294	0.589	0.722309	0.35	1.05349	1.76996	0.853565	1.41185	0.98395	0.939673	0.777396	0.0632893
		CDKL2	0.94737	0.0767176	0.767905	0.903	0.59496	0.43	1.27255	0.286133	0.236128	0.403022	0.999864	0.999595	1.11184	0.69264
		CDKL5	0.784584	9.66e-07	1.41421	0.234	2.1067	0.042	0.975715	1.231	1.24619	1.4615	1.00319	0.989136	0.857196	0.347322
		CDKN1A	1.21083	0.967422	1.07773	0.774	1.03233	0.91	1.21844	4.42811	6.99367	20.0261	0.875594	0.0236461	1.81014	1.5324e-36
		CDKN1B	1.15109	0.823578	1.23371	0.279	1.03538	0.057	1.04557	0.518294	1.35314	2.28536	1.20991	0.0110711	0.887572	0.145358
		CDKN1C	1.50212	9.88e-16	1.58227	0.121	4.84915	0.052	0.614556	0.673487	0.389053	3.43636	0.849566	0.64989	1.06339	0.876798
		CDKN2AIP	1.13524	0.407254	0.825878	0.451	0.879234	0.18	1.05288	0.974267	0.986496	1.74229	0.985843	0.928767	1.28837	0.00563923
		CDKN2AIPNL	0.873573	0.323798	0.573554	0.344	1.13805	2.3e-07	0.848688	0.505721	0.473738	0.32748	0.934177	0.558605	0.994191	0.96873
		CDKN2C	0.568015	0.779553	0.879649	2e-06	1.04933	0.37	0.990621	0.491621	0.228982	0.462902	0.886029	0.0899313	0.883825	0.0743186
		CDKN2D	1.13288	5.89e-09	0.99585	0.608	2.45579	0.99	0.864998	0.718072	0.602148	0.599396	0.801704	0.255097	2.3463	6.9139e-10
		CDKN3	0.85441	5.47e-08	0.409518	0.28	0.548608	5.7e-16	1.029	0.485454	0.178717	0.218323	0.891351	0.301568	1.23705	0.0206482
		CDON	0.744839	4.61e-08	2.05765	0.164	2.44138	1.6e-05	1.29843	1.51251	1.79638	3.67487	1.1081	0.374582	0.75884	0.00313654
		CDPF1	0.74072	0.470096	0.967947	0.226	0.834239	0.92	1.01561	0.691789	0.561724	0.40931	0.977896	0.924543	0.991508	0.971453
		CDR2	1.19748	0.000266141	0.99585	0.156	0.681824	0.98	1.14426	1.22778	1.41212	3.8564	0.847513	0.0121263	1.19227	0.00487833
		CDR2L	0.76897	1.09e-07	2.48113	0.214	2.28677	5e-09	0.818852	2.93213	3.74747	1.5517	0.886926	0.0627895	1.2822	5.26713e-06
		CDS1	2.43176	1.38e-05	1.01396	9.73e-05	0.342674	0.97	1.49799	0.541299	0.474762	0.454246	1.60535	1.27413e-08	0.760483	0.00363073
		CDS2	0.950659	0.0381882	0.842647	0.754	1.25774	0.15	1.09251	1.03707	0.959089	0.936702	1.14851	0.0130074	0.772101	5.38132e-07
		CDT1	0.644834	8.46e-17	0.489371	5.31e-05	0.441266	6.4e-13	0.825437	0.6708	0.154395	0.275145	0.853498	0.000213217	1.17642	7.87727e-05
		CDV3	1.29864	0.162438	1.30858	0.0457	0.835168	0.025	0.875314	1.86002	0.814026	1.00144	1.04702	0.230062	0.907646	0.00230445
		CDYL	1.14949	0.0799053	1.00417	0.374	0.795117	0.98	0.987277	0.990097	0.842508	0.702925	0.937641	0.537013	0.844342	0.0365016
		CEBPB	1.35472	4.79e-07	0.583579	0.0655	0.500784	0.00014	0.895222	0.261478	0.273409	0.149663	0.749202	0.000449022	0.641235	1.41832e-08
		CEBPD	3.28297	2.3e-06	3.55784	5.38e-06	3.21956	2.7e-07	1.09416	4.87385	22.7363	37.647	0.991517	0.982196	1.30544	0.250134
		CEBPG	1.76418	0.313386	0.958599	6.21e-09	0.886707	0.77	1.08543	0.789953	0.821981	0.656307	1.01403	0.866268	0.8191	4.02281e-05
		CEBPZ	1.08373	0.139096	0.645729	0.615	0.832171	7.2e-05	1.03826	0.786125	0.810892	0.638347	0.914216	0.201334	0.881083	0.0445058
		CEBPZOS	1.22944	0.99293	1.11574	0.238	1.00231	0.56	1.09963	0.875019	0.658821	0.568048	0.867376	0.0478184	0.756484	1.33635e-05
		CECR2	2.1155	0.515465	1.59218	0.00384	1.23016	0.081	0.985084	1.31188	2.66455	0.361426	0.918182	0.334652	0.765904	0.000107622
		CELF1	1.31403	0.000952283	0.842647	0.0066	1.35592	0.092	1.03695	0.939877	0.592164	0.487734	1.06521	0.15026	0.84796	5.02669e-06
		CELF5	0.715488	2.17e-09	0.194656	0.334	0.183759	1.9e-08	0.905278	0.094039	0.0250684	0.264649	1.04074	0.918445	2.25297	0.000120876
		CELSR1	1.54328	2.83e-11	2.48285	0.00443	2.38305	3.5e-12	0.741847	2.20912	2.27288	1.30935	1.4206	5.52086e-07	0.922916	0.389962
		CELSR2	0.939523	3.04e-09	0.626332	0.756	0.481449	0.00027	0.941737	0.289334	0.561429	0.813232	1.54375	4.5173e-14	0.97551	0.801706
		CELSR3	1.8	2.04e-10	2.04769	0.00556	3.12253	0.00019	2.65607	1.64861	4.37851	10.781	1.29514	4.88798e-06	1.8916	3.96041e-35
		CEMIP	0.415811	0.0396175	1.19831	0.0116	1.84262	0.65	1.36458	17.9402	1.59638	0.959018	0.803567	0.510364	0.907263	0.792919
		CEMIP2	2.41999	0.000367291	1.35379	1.26e-11	1.60651	0.035	1.14569	1.68961	0.922534	1.72688	1.37968	0.000213704	0.881545	0.232619
		CENATAC	0.98214	0.000745022	1.06142	0.934	0.654797	0.74	1.08651	0.720697	0.867106	1.1036	0.855064	0.0916961	0.910628	0.356775
		CENPA	0.665265	0.0537706	0.540737	0.00185	0.778402	2.2e-07	1.05106	0.510259	0.162746	0.188446	0.709536	0.00187751	0.730525	0.00422305
		CENPB	0.643941	0.239261	0.691116	0.00171	0.836046	0.0059	0.739075	1.20818	0.653372	0.537987	0.892317	0.0320542	0.721227	1.58371e-12
		CENPBD1	0.976709	0.299489	0.87843	0.918	1.17631	0.44	1.06978	0.902427	0.48408	0.466804	1.23264	0.0823254	0.990542	0.960278
		CENPBD1P1	0.866337	0.602293	0.873573	0.433	0.909172	0.43	0.996705	0.668899	0.898302	0.894546	0.855032	0.182555	1.41	0.000268775
		CENPC	0.954621	0.797218	0.784584	0.875	0.933569	0.25	1.15752	0.867855	0.62842	0.641651	0.818967	0.0351559	0.725951	0.000239365
		CENPE	1.07177	1.85e-06	0.480964	0.662	0.610453	4.7e-13	1.23656	0.664225	0.142115	0.223607	0.933158	0.240109	1.08085	0.15044
		CENPF	0.93045	0.000621089	0.427205	0.645	0.695016	1.4e-17	1.13623	0.323405	0.140537	0.245222	0.8083	5.33298e-12	0.952573	0.205408
		CENPH	0.657016	1.7e-05	0.458184	0.00201	0.588754	1.6e-10	0.975415	0.321891	0.092075	0.166428	0.933867	0.419978	1.00368	0.97442
		CENPI	0.634635	9.99e-12	0.390935	0.00136	0.4231	2.1e-13	1.11209	0.675311	0.111121	0.300565	1.01764	0.883286	0.76909	0.000276521
		CENPJ	0.953299	8.77e-05	0.471066	0.792	0.63961	1.6e-11	1.0528	0.814543	0.441214	0.60504	1.08799	0.423229	0.863309	0.101805
		CENPK	1.09962	0.127212	0.573554	0.622	0.79742	2.6e-05	1.0951	0.558076	0.123648	0.306179	0.987254	0.911642	0.79159	0.000751264
		CENPL	0.989657	0.228282	0.598324	0.969	0.81831	0.00044	1.06783	0.828444	0.426747	0.486797	0.982655	0.904698	1.45651	2.91267e-06
		CENPM	0.621144	4.66e-13	0.438303	0.000611	0.405635	7e-11	0.757872	0.481389	0.0554543	0.156849	0.914086	0.294594	0.953834	0.621405
		CENPN	1.16716	0.00995223	0.544876	0.306	0.729742	1.3e-07	1.08306	0.931726	0.275417	0.57285	0.980635	0.865557	1.09702	0.255149
		CENPO	0.82645	0.0236279	0.543367	0.173	0.760708	5.5e-08	0.941433	0.80768	0.287287	0.408584	0.861422	0.115387	0.884382	0.198635
		CENPP	1.11419	0.115002	1.09733	0.656	1.32885	0.69	1.03664	0.633388	0.252308	0.320696	0.834991	0.270312	0.836787	0.258709
		CENPQ	1.2605	0.946516	0.844986	0.216	1.01771	0.37	1.18123	0.663125	0.41713	0.456888	0.93358	0.689751	1.17249	0.237159
		CENPT	0.736113	0.538903	1.2781	0.0532	1.1158	0.1	0.925317	1.75864	0.9429	1.01739	0.850055	0.0119958	0.869757	0.032582
		CENPU	1.01607	2.42e-07	0.559806	0.934	0.577418	5.9e-08	1.05676	0.590711	0.203856	0.313313	0.955738	0.58219	1.36026	8.03466e-09
		CENPV	0.677832	2.07e-18	0.599155	0.00318	0.362616	2e-05	0.922818	0.493159	0.399755	0.539439	0.826819	1.17035e-05	1.31213	1.9593e-11
		CENPW	1.01889	0.866112	0.646176	0.935	1.036	0.0014	0.848327	0.670113	0.17475	0.264278	0.901414	0.295438	0.811808	0.0122573
		CENPX	0.650671	0.00929655	0.730016	0.00277	0.700202	0.025	0.737732	0.566189	0.434687	0.326505	0.795848	0.00031056	0.868896	0.0365
		CEP104	0.966606	0.660482	0.982821	0.849	1.06864	0.92	1.04781	1.16218	1.15424	0.883943	1.01942	0.835503	1.03516	0.668167
		CEP112	1.05702	0.886837	0.997231	0.796	0.969366	0.99	1.23219	0.648706	0.659974	0.533751	1.06341	0.76433	1.1251	0.491357
		CEP120	0.666187	0.00259757	0.65022	0.00242	0.685649	0.00055	1.28282	0.744871	0.681509	0.577489	0.868019	0.120953	1.3439	8.61526e-05
		CEP126	0.812252	0.00670089	1.17609	0.576	1.99701	0.65	0.961356	0.861539	2.05691	1.23601	1.12078	0.670811	0.679679	0.0591719
		CEP128	1.08598	0.834749	0.575545	0.71	1.04797	0.00024	0.993607	0.626195	0.221995	0.420774	1.15356	0.177787	1.16378	0.131205
		CEP131	0.677362	0.104098	1.07475	0.01	0.783828	0.71	0.826144	1.02251	0.42778	0.668627	0.911009	0.248963	1.00379	0.974005
		CEP135	1.59549	0.000271002	0.653383	0.00216	0.587448	0.005	1.02638	0.757731	0.449344	0.572757	1.00693	0.950505	0.742142	1.06701e-06
		CEP152	0.889459	8.61e-08	0.425727	0.454	0.549297	2.6e-14	1.22062	0.523388	0.128283	0.282707	0.891384	0.252608	1.07318	0.506833
		CEP162	0.990343	0.955182	0.988286	0.974	0.984855	0.96	1.0198	0.644175	0.692836	1.00012	1.00041	0.997783	1.29386	0.0145179
		CEP164	0.997923	0.683471	0.926588	0.992	1.06632	0.62	1.17901	1.27945	1.14308	1.19619	1.0463	0.606467	1.18043	0.00762934
		CEP170	0.82245	0.169004	0.718968	0.166	1.19655	0.0059	1.14393	1.1165	0.993441	0.987966	0.888415	0.0139252	0.807307	9.24147e-07
		CEP170B	1.30858	0.0523438	1.34071	0.064	1.29748	0.026	0.898987	2.08465	1.21999	6.70316	1.17247	0.000502773	1.18389	0.000158879
		CEP19	1.52838	0.974897	0.772711	0.0103	1.00904	0.14	1.17158	0.524983	0.378748	0.359598	1.17318	0.533007	0.773666	0.258741
		CEP192	0.86814	4.75e-05	0.598324	0.414	0.595456	6.3e-05	1.10053	0.710863	0.70975	0.893542	1.11969	0.211519	0.963315	0.738764
		CEP20	0.934327	0.0073585	0.735094	0.701	0.722283	0.012	1.01005	0.870662	1.71249	1.26659	0.934307	0.436556	0.911974	0.239261
		CEP250	0.759436	0.105377	0.756808	0.0545	0.801941	0.034	1.07053	0.757722	0.636077	0.478351	1.13965	0.0162577	1.39523	1.18734e-12
		CEP290	0.813379	0.000103164	0.657927	0.14	0.639804	0.00033	1.11939	0.839175	1.00365	0.555009	0.988035	0.907606	1.24735	0.000171059
		CEP295	0.876606	0.0240879	0.556325	0.431	0.743826	1.5e-06	1.18001	0.724871	0.325445	0.369852	0.891403	0.314228	1.05668	0.666425
		CEP350	1.0203	0.872801	0.746907	0.922	1.03064	0.02	1.21279	0.770322	0.767207	0.878886	1.0553	0.457582	0.966839	0.660136
		CEP41	1.1274	0.661505	0.939523	0.456	0.930195	0.71	0.952202	1.48739	0.87148	0.840012	0.904415	0.429311	0.817939	0.056613
		CEP43	0.984866	0.172046	0.877822	0.953	0.79231	0.51	0.923982	0.887191	1.30813	0.977982	1.14354	0.181619	0.735972	0.000321199
		CEP44	1.01255	0.381075	0.675487	0.966	0.839551	0.022	1.12168	0.537807	0.405822	0.669703	0.947877	0.637912	0.708532	8.08259e-06
		CEP55	0.862741	0.17505	0.521956	0.251	0.854197	2.6e-11	1.1604	1.18009	0.102987	0.36785	0.904601	0.158793	1.03157	0.724997
		CEP57	1.25006	0.92365	0.843231	0.0972	0.981434	0.2	1.1724	0.88784	0.761328	1.0806	1.04674	0.602297	0.882531	0.063682
		CEP57L1	0.976032	0.254204	0.940826	0.919	0.832561	0.76	1.22843	1.08956	0.583721	0.491158	0.979006	0.879814	0.825737	0.0348721
		CEP63	1.01537	0.612255	0.961927	0.942	1.08353	0.83	1.09762	0.985981	0.802874	0.442536	1.26906	0.0318001	1.05416	0.72996
		CEP68	0.929161	0.712288	1.2544	0.712	1.07101	0.12	1.02081	1.25029	0.616884	0.749131	1.04827	0.676691	0.918907	0.381364
		CEP70	1.05555	0.284373	0.844401	0.796	0.844699	0.29	1.15079	0.891568	0.794383	1.57035	1.09895	0.476593	0.914383	0.492433
		CEP72	0.951978	4.5e-05	0.612593	0.843	0.539163	0.0017	0.963398	0.649911	0.211545	0.338025	0.883373	0.287615	1.15784	0.165724
		CEP76	1.02314	0.133108	0.788947	0.924	0.792323	0.13	1.02894	0.771652	0.515886	0.445877	0.906692	0.594774	1.06829	0.725628
		CEP78	0.976709	2.19e-10	0.709562	0.902	0.501994	0.0031	1.01992	0.568424	0.312222	0.933006	1.06122	0.319864	0.793877	5.82247e-07
		CEP83	1.0203	7.02e-05	0.659297	0.931	0.588407	0.0026	1.01224	1.06461	0.560346	0.595916	0.937721	0.550181	0.929113	0.462987
		CEP85	0.668037	5.54e-09	0.373971	0.000737	0.535026	3.5e-20	0.939984	0.556053	0.378665	0.398982	0.840092	0.00162755	1.04525	0.535285
		CEP85L	0.941478	0.768792	0.819037	0.827	1.07535	0.34	1.26701	1.13505	1.30547	2.07608	0.936115	0.623995	0.923431	0.521333
		CEP89	0.99516	0.282625	1.09885	0.981	1.14362	0.49	0.945962	1.24777	1.16582	1.07359	0.888525	0.117778	1.73042	1.18288e-21
		CEP95	1.09429	0.00349427	0.892547	0.629	0.681045	0.49	1.10314	0.86429	0.997957	1.36318	0.988279	0.897402	1.02765	0.734252
		CEP97	0.704172	0.117845	0.605417	0.0171	0.796937	0.00013	1.2005	0.652786	0.472426	0.422979	0.874894	0.0642095	0.940638	0.464362
		CEPT1	0.757858	0.273555	0.842647	0.108	0.830036	0.33	1.13684	0.979741	1.0155	0.730644	0.905006	0.265595	0.809618	0.00458182
		CERCAM	0.693515	0.0894842	2.33108	0.013	1.27384	3.5e-12	0.815107	3.71685	2.07785	4.64103	1.15257	0.0116409	0.865423	0.0102796
		CERK	1.03311	0.0784505	0.810565	0.832	1.19901	0.038	0.735097	1.05652	0.526209	0.447345	1.10584	0.0477814	0.857443	0.000990177
		CEROX1	1.04247	0.403785	1.73027	0.932	0.743034	0.065	0.971845	0.742669	0.8564	0.754566	1.04524	0.881117	0.714462	0.0991225
		CERS2	0.858565	0.672141	0.724973	0.25	1.06414	0.0027	0.95426	1.20025	0.871754	0.914192	1.00172	0.988041	1.04855	0.584982
		CERS4	0.999307	0.369602	2.08349	0.999	0.725674	0.01	0.568145	0.460454	1.24575	1.30375	0.896375	0.609399	1.04302	0.859075
		CERS5	1.04247	0.244801	1.30586	0.808	1.15555	0.016	0.810891	1.7507	1.14759	1.64834	0.960036	0.743322	0.936902	0.547752
		CERS6	0.778625	0.00408885	0.672217	0.268	1.65769	0.039	0.743632	0.846639	0.745701	1.26775	0.989705	0.940319	0.874578	0.13214
		CERT1	0.925304	0.941336	0.97942	0.655	0.98504	0.91	1.04363	0.960707	0.947031	1.18932	0.989008	0.929233	0.901132	0.211599
		CES2	0.530712	0.0533912	1.01607	2.28e-07	1.27592	0.94	0.982582	0.998261	0.850809	0.627698	0.824736	0.00551046	0.871465	0.0580901
		CES3	0.827023	0.146211	1.0403	0.658	0.61909	0.93	1.18991	0.310709	0.900317	1.10013	1.1628	0.135699	0.964036	0.784751
		CETN2	1.19499	1.35e-05	1.34723	0.172	1.56935	0.0066	1.14719	1.01584	1.61847	1.13657	1.08005	0.337252	1.07705	0.342351
		CETN3	1.19997	0.068898	0.882703	0.289	1.30208	0.48	1.05564	0.73691	0.84227	0.575189	1.07139	0.555197	1.2785	0.00340839
		CFAP126	1.1235	0.738111	0.82645	0.758	1.12403	0.56	1.03904	0.6677	1.31373	1.42752	1.3571	0.0232148	0.904221	0.563848
		CFAP20	0.938221	0.00845753	0.842063	0.723	0.726197	0.21	0.96792	0.867202	0.62857	0.689004	0.785042	0.00487787	1.24366	0.00884153
		CFAP251	1.41421	0.0615503	1.27456	0.094	1.42233	0.24	1.40569	1.30527	1.34907	1.12476	0.831671	0.555515	4.31399	2.89049e-15
		CFAP298	0.692555	0.366383	1.0403	0.175	0.784647	0.91	0.991429	0.853726	0.715813	0.424873	0.822745	0.303721	0.528564	3.81116e-05
		CFAP36	0.955945	0.000716223	1.08598	0.806	1.46774	0.59	1.11902	0.916647	1.5091	0.975435	0.987806	0.921613	1.03438	0.750494
		CFAP410	0.810003	0.000821925	1.13446	0.571	2.28174	0.73	0.813339	1.15508	1.41677	1.84299	1.00818	0.981624	0.695061	0.0808864
		CFAP69	2.26263	0.109828	1.87905	0.0125	1.68988	0.048	1.15476	0.646686	1.89654	0.697144	1.12871	0.557528	1.12629	0.548094
		CFAP97	0.882703	0.236879	0.873573	0.413	0.855032	0.33	0.891429	1.55664	0.850935	0.56473	1.02321	0.863744	0.793573	0.00544802
		CFD	0.581963	0.859749	1.76418	0.207	0.910841	0.12	0.861849	0.326803	0.433419	0.590467	1.56455	0.00049042	0.923411	0.672286
		CFDP1	1.15669	0.182543	1.06585	0.322	0.84011	0.69	0.996632	0.537768	0.628642	0.489753	1.04281	0.691082	1.13983	0.0930061
		CFL1	0.866337	5.98e-10	1.02811	0.319	0.520382	0.87	0.910607	1.54427	0.748968	1.02936	0.804544	2.09597e-11	0.980655	0.696509
		CFL2	1.2781	4.89e-11	2.36526	0.0691	2.0463	1.5e-15	1.17277	1.62014	0.902317	1.45136	0.944652	0.426639	0.8532	0.00432922
		CFLAR	1.06881	6.81e-05	1.26225	0.673	1.50685	0.038	1.02334	1.97554	1.35187	1.61891	1.02942	0.838313	0.923082	0.482622
		CGGBP1	1.26138	0.0512165	0.746389	0.0632	0.797497	0.0088	1.11501	0.612347	0.457844	0.65122	1.07179	0.177151	0.913685	0.0539229
		CGN	1.82766	0.920688	0.849096	0.0116	0.963213	0.59	0.889022	0.431428	0.597508	0.511717	1.10821	0.262456	0.863548	0.0775457
		CGNL1	1.54756	0.0337221	2.01112	0.196	1.84044	0.013	0.965606	1.40037	0.550277	0.783655	1.42188	0.149085	0.972156	0.939315
		CGRRF1	1.30044	0.694239	1.22349	0.18	1.09346	0.29	1.15435	1.16792	1.24939	4.85422	0.95703	0.826724	1.1989	0.195345
		CHAC1	1.33237	0.781848	1.40056	0.161	1.07239	0.066	1.13581	1.0359	2.83118	0.461761	1.13622	0.404883	0.629767	0.000117861
		CHAC2	0.842063	1.63e-11	0.380772	0.413	0.355967	5.9e-10	0.862663	0.6605	0.160085	0.211457	0.874836	0.292328	1.05833	0.699732
		CHAF1A	0.768438	9.91e-11	0.537747	0.0388	0.505001	6.5e-09	0.861321	0.534196	0.14141	0.343243	0.905901	0.0202026	1.12382	0.00335522
		CHAF1B	0.785673	3.69e-21	0.488016	0.0803	0.350784	2.2e-10	0.923603	0.536721	0.18096	0.569657	0.998884	0.990604	0.926302	0.217428
		CHAMP1	0.789494	2.59e-05	0.705638	0.115	0.595018	0.0073	1.22479	0.76194	0.763732	0.964142	0.93808	0.483195	0.771975	0.000102141
		CHCHD1	0.89131	0.377114	0.984184	0.513	1.14663	0.94	0.861985	0.740349	0.733164	0.726891	0.870802	0.185211	0.885868	0.242228
		CHCHD10	0.768438	0.00954956	1.01045	0.202	0.637817	0.97	0.773485	0.892817	0.89021	0.707438	0.958218	0.57007	0.989131	0.900744
		CHCHD2	0.927873	0.854048	0.86334	0.624	1.03097	0.23	0.977774	0.835791	0.929898	0.627797	0.858727	2.25578e-05	1.21037	1.95065e-08
		CHCHD3	0.983502	0.00649128	0.724471	0.919	0.762362	0.00098	1.04108	0.634084	0.687163	0.650962	0.912093	0.0543942	1.13965	0.00242491
		CHCHD4	0.735603	0.00613631	0.652025	0.0428	0.690468	0.0014	0.979416	0.876982	0.745349	0.386597	0.938384	0.543161	0.877284	0.123888
		CHCHD5	0.779705	0.924513	0.815072	0.156	0.976993	0.22	0.765104	0.742023	0.43024	0.55927	1.05631	0.789273	1.05269	0.795405
		CHCHD6	0.868742	0.944438	1.10343	0.526	0.981218	0.65	0.839629	0.518479	0.94473	0.556396	1.04801	0.725787	1.13626	0.211372
		CHCHD7	1.04681	0.731575	0.91955	0.808	0.943254	0.6	1.04083	0.592527	0.613419	0.502715	1.01435	0.910956	0.817744	0.0103976
		CHD1	1.27721	0.931007	0.957271	0.0255	1.0146	0.76	1.02091	1.06792	1.21326	0.899548	0.946468	0.304351	0.803663	9.13843e-08
		CHD2	1.29864	0.133642	1.232	0.0293	1.19401	0.07	1.02289	0.831755	1.36878	1.47581	0.945319	0.310878	2.21673	1.70166e-100
		CHD3	0.534033	9.13e-13	0.581157	6.13e-11	0.519358	5.8e-09	0.854742	0.23244	0.445001	0.62866	1.01834	0.763192	1.00547	0.933892
		CHD4	0.870551	0.0986771	1.83528	0.468	1.28273	4.4e-06	0.931739	1.0108	1.04614	0.960988	0.860027	0.173914	0.790595	0.0174742
		CHD6	1.03311	1.61e-05	1.01748	0.868	1.63457	0.93	1.12153	0.76391	0.694298	0.902403	1.00494	0.965763	1.14602	0.0413177
		CHD7	0.96929	0.951718	0.714497	0.854	0.98922	0.0013	1.00639	1.01347	1.99263	0.591106	1.04041	0.520355	0.883754	0.00764288
		CHD8	0.752102	0.480059	0.6685	0.00758	0.915665	2.4e-05	1.03305	0.732054	0.716769	0.710477	0.898589	0.00624568	1.35954	4.6461e-20
		CHD9	0.688248	0.873093	0.79996	0.00471	0.969669	0.096	1.15915	0.625289	0.844252	1.14334	0.986136	0.899622	1.24169	0.000792002
		CHEK1	1.06585	0.00018373	0.606256	0.656	0.698915	8.7e-08	1.00186	0.668198	0.273605	0.664536	1.02083	0.814141	0.982505	0.836403
		CHEK2	0.672217	7.78e-11	0.540363	0.00239	0.470414	2e-07	0.947584	0.374197	0.251987	0.189081	0.915236	0.356721	0.977405	0.847258
		CHERP	1.13131	5.97e-09	0.951978	0.414	0.527563	0.77	0.844267	0.68017	0.701065	0.703942	1.07439	0.322116	0.972954	0.747918
		CHFR	1.15189	0.97201	1.13761	0.324	1.00745	0.34	1.02421	1.61891	0.890553	1.20508	1.18291	0.052159	1.04001	0.738055
		CHIC1	0.741747	0.605849	1.13918	0.203	0.877409	0.61	1.37767	0.809295	0.813626	0.977352	0.960567	0.850477	0.720341	0.0176172
		CHIC2	1.28165	0.000656731	1.72071	0.384	2.04212	0.014	0.796087	1.93321	2.09405	1.44618	0.856309	0.357095	1.03298	0.879599
		CHID1	0.894405	0.00832669	1.01748	0.458	0.739477	0.93	0.706173	1.11243	0.570304	0.506187	0.890495	0.0912095	0.883451	0.0594797
		CHKA	1.25353	0.555521	1.41128	0.0766	1.08889	0.0017	1.01419	0.914718	0.641949	0.980253	0.832779	0.0436358	0.891277	0.239706
		CHM	1.26313	0.601566	0.918913	0.111	0.916382	0.62	1.06584	1.14598	1.10501	1.19481	1.02988	0.806901	0.796047	0.0031469
		CHML	0.823591	0.322434	0.569197	0.382	0.819065	0.0011	1.00925	0.889813	0.0824996	0.288932	1.01622	0.861359	0.733831	5.72121e-09
		CHMP1A	0.944747	0.507577	0.90689	0.754	1.10596	0.52	0.887734	1.16397	0.859293	1.04325	0.978139	0.765752	0.760592	1.53715e-09
		CHMP1B	1.51467	0.00448134	1.41912	0.00138	1.42098	0.0049	1.10232	1.21541	0.817656	0.521897	0.873411	0.317035	1.16332	0.223763
		CHMP2A	1.01748	4.37e-05	1.52838	0.929	1.54394	7.6e-05	0.975593	1.06533	1.13345	0.776223	1.14095	0.08865	1.36356	1.74734e-06
		CHMP2B	1.06363	0.834965	1.04464	0.733	1.03828	0.81	0.705648	0.983936	1.08371	1.20396	1.01872	0.799697	0.888095	0.0131629
		CHMP3	1.6144	0.00124292	0.737646	0.000148	0.6722	0.018	0.982358	1.13048	0.872466	1.19409	1.318	1.77099e-05	0.869561	0.0575693
		CHMP4B	1.07252	4.12e-05	1.44493	0.65	1.52185	0.00042	0.931026	1.40719	0.890617	0.870956	0.96108	0.557528	0.995451	0.956809
		CHMP4C	1.67481	0.05834	1.45196	0.0659	0.593522	0.18	1.69894	1.98364	1.80281	#VALUE!	1.04844	0.896488	0.872057	0.66253
		CHMP5	1.03598	0.00173544	1.03958	0.842	1.40229	0.81	0.965393	1.11384	0.897921	0.707978	0.95429	0.584967	1.01571	0.873441
		CHMP6	0.385286	0.247237	0.706127	1.09e-06	1.27083	0.085	0.847744	1.42467	0.495308	0.555871	0.814292	0.144348	0.85671	0.287643
		CHMP7	0.710546	0.386799	0.893166	0.00612	1.12882	0.43	1.0192	1.1436	0.646665	0.665435	0.958785	0.698974	0.770354	0.000340797
		CHN1	0.880869	0.745151	0.641268	0.601	1.08157	0.013	1.03472	0.859465	0.656484	0.498031	0.797881	0.0294231	1.46252	2.24053e-05
		CHORDC1	0.844986	2.49e-27	0.425432	0.134	0.390326	1.4e-22	1.09285	0.847182	0.381627	0.417331	0.876335	0.00257865	0.841206	3.16924e-05
		CHP1	0.793884	0.673924	1.02954	0.0525	1.06233	0.86	1.09735	1.2118	1.41986	1.22758	0.849593	0.0223411	0.7972	0.000673948
		CHPF	1.33145	3.63e-32	3.09942	0.0549	3.96373	1e-21	0.858019	5.69426	10.9306	6.29269	1.0076	0.939129	0.925998	0.252744
		CHPF2	1.0196	7.85e-10	2.05338	0.93	2.03105	5.3e-10	1.02182	2.51893	1.96898	3.49248	0.875092	0.0192018	0.710013	1.26701e-11
		CHPT1	0.852044	0.152959	0.980099	0.283	1.20422	0.92	1.02141	1.52811	0.854414	0.869755	1.0522	0.544302	1.03264	0.716512
		CHRAC1	0.801625	0.00149845	0.75419	0.161	0.659578	0.043	1.01875	0.755597	0.598488	0.927193	0.762683	1.4253e-05	0.754875	5.89481e-06
		CHRNA5	0.492433	0.0453412	0.623733	0.0187	0.569306	0.11	0.871069	0.77335	0.647192	0.495304	0.818168	0.114233	0.649772	9.9471e-05
		CHRNB1	1.05336	0.00320443	2.86791	0.875	1.77322	5.4e-09	0.911328	1.3078	1.49239	0.890162	0.964148	0.876284	1.19357	0.293423
		CHROMR	1.15029	0.977098	1.12896	0.525	1.00836	0.56	1.15324	0.929212	0.611596	0.627202	1.05727	0.679661	0.764582	0.00467503
		CHST10	0.815072	0.0252961	0.872363	0.312	0.689681	0.5	0.968229	0.868013	0.478777	0.55047	1.05449	0.632086	0.724577	2.67379e-05
		CHST11	1.12818	1.72e-15	2.87787	0.786	6.5438	3.9e-05	1.04773	6.2497	17.9419	5.75431	0.825095	0.197457	1.03971	0.841113
		CHST12	0.721464	3.07e-06	0.985549	0.0241	0.558599	0.95	0.845422	0.903111	0.963199	1.05541	0.762605	0.000337231	0.757546	0.000210374
		CHST14	0.89751	2.46e-16	1.78633	0.546	2.55895	1.4e-06	0.84266	2.19028	1.39143	1.63972	0.943264	0.665432	0.797094	0.0203106
		CHST2	1.09354	2.72e-57	3.69865	0.698	8.01887	3e-22	0.750542	6.28504	8.58571	2.31706	0.981539	0.924525	0.828734	0.148553
		CHST3	0.833353	3.47e-14	1.63694	0.234	2.32094	2.6e-05	0.857899	2.67372	2.72957	1.55441	1.0229	0.911642	0.877371	0.390311
		CHST6	1.07624	0.403546	0.871154	0.705	0.874833	0.39	0.994601	1.34212	1.01353	1.35633	0.819723	0.520732	1.02	0.959262
		CHST7	0.781328	0.490505	0.847332	0.269	1.16592	0.46	0.934373	2.42331	1.49924	0.385622	0.883127	0.530058	0.744667	0.0623117
		CHST8	1.7411	0.957408	0.433769	0.137	0.970527	0.018	1.06549	2.25469	0.191655	#VALUE!	1.29623	0.355256	1.09075	0.799453
		CHSY1	1.12272	1.24e-07	1.04681	0.4	1.68155	0.76	0.955058	1.28484	1.22747	3.50549	1.13073	0.0290399	0.992491	0.933047
		CHTF18	0.503129	5.32e-12	0.424548	2.18e-07	0.423677	9.4e-12	0.803233	0.953666	0.107914	0.208071	0.760701	1.25215e-08	0.897057	0.044703
		CHTOP	1.03455	0.399369	0.833353	0.838	0.898652	0.11	0.900865	0.716031	0.640463	1.12669	0.991958	0.904864	0.809639	2.30891e-08
		CHUK	0.742262	0.13239	0.476319	0.0191	0.826846	1.1e-11	1.16537	0.582587	0.717777	0.996093	0.940813	0.323922	1.0176	0.819542
		CHURC1	1.67133	0.101392	1.30134	0.000101	1.25875	0.056	1.18541	1.0838	1.04538	0.815054	1.14265	0.277453	0.777407	0.0184603
		CIAO1	0.83047	0.273917	0.997923	0.13	0.876447	0.99	1.00745	0.959252	1.22046	1.17752	0.956569	0.401568	0.740534	2.86745e-15
		CIAO2A	1.12117	0.766281	0.823591	0.411	0.955432	0.094	1.02599	0.769199	0.721884	0.538429	1.08556	0.418547	0.904302	0.284064
		CIAO2B	0.985549	0.00224587	1.08373	0.94	1.40543	0.59	0.859487	0.866757	0.640777	0.503735	0.822217	0.00646816	1.00798	0.945397
		CIAO3	0.847332	0.294413	0.867539	0.406	0.830569	0.45	0.842046	0.871363	0.659981	0.668026	0.902226	0.374502	0.853948	0.118491
		CIAPIN1	1.09278	0.167243	0.726483	0.534	1.17174	0.0021	0.957547	0.916886	0.96182	0.861526	0.982716	0.859718	0.934902	0.360092
		CIB1	1.06807	0.00133867	1.6529	0.788	1.6397	0.0011	0.993028	2.40715	1.5722	1.25637	1.02943	0.816819	1.01555	0.904616
		CIBAR1	1.27721	0.962285	1.17609	0.0589	0.99041	0.21	1.29336	0.907786	0.696822	0.926898	1.09298	0.351518	0.912821	0.326469
		CIC	0.855595	0.0253396	1.11111	0.204	1.2618	0.39	0.94092	1.07164	1.81565	2.34906	1.06098	0.261507	1.48357	2.71932e-25
		CIDECP1	1.05702	0.262172	1.44593	0.86	1.28194	0.073	0.914353	1.62385	1.39009	0.876537	0.870778	0.335169	2.11035	4.40017e-14
		CILK1	0.849685	0.706193	1.56808	0.309	0.935965	0.0002	1.14452	0.945813	0.72037	0.350767	0.924677	0.517529	0.934801	0.572648
		CILP2	0.787854	2.95e-06	2.47084	0.332	2.23038	1.2e-07	0.649698	1.94627	1.82662	8.10925	0.923747	0.661112	0.935765	0.711857
		CINP	0.916369	0.854208	0.847332	0.615	1.03491	0.24	1.00448	1.07292	0.729949	0.698306	0.955713	0.669789	0.848837	0.0346148
		CIP2A	0.792784	7.6e-09	0.363997	0.0672	0.547689	1.4e-22	1.01849	0.692784	0.173717	0.319818	0.842385	0.000905207	0.74945	2.95896e-09
		CIPC	0.804408	4.12e-05	0.518351	0.24	0.549179	7.5e-06	1.10158	0.575423	0.833686	0.868015	1.03303	0.817565	0.881871	0.223109
		CIR1	1.34257	0.241848	1.73267	0.0419	1.18797	6.6e-06	1.0292	1.00539	1.41487	1.28284	0.894368	0.291525	1.1699	0.0893946
		CIRBP	0.933033	0.0128089	1.08975	0.65	1.30777	0.53	0.869951	0.926708	1.06396	0.902901	0.992753	0.911642	0.939766	0.157672
		CISD1	1.09126	0.441998	0.76631	0.593	0.894584	0.029	1.13804	0.84767	0.956553	0.43771	0.941388	0.613429	0.850718	0.0776512
		CISD2	1.31221	0.567747	1.28699	0.0454	1.09419	0.046	0.911772	1.17946	2.76435	2.5853	1.00626	0.962667	0.84187	0.0287064
		CISD3	0.533293	0.596766	1.05482	0.0159	0.85227	0.88	0.820613	2.52221	0.407252	0.762687	0.841809	0.128555	0.852517	0.153137
		CIT	0.723467	0.000500224	0.485654	0.0367	0.62496	3.4e-08	1.054	0.832052	0.223674	0.345539	1.0112	0.915485	1.3297	7.09115e-07
		CITED2	0.882091	1.06e-22	0.596254	0.366	0.3826	3.8e-07	0.831305	0.998513	0.381135	0.629335	0.947198	0.58624	1.12074	0.147844
		CITED4	2.52275	9.39e-06	6.06287	0.0107	4.00178	3.5e-09	1.13079	4.15867	9.48546	0.748317	0.936415	0.845342	1.35257	0.193409
		CIZ1	0.883315	0.0984113	1.09962	0.315	0.840457	0.43	0.909814	1.37277	1.05049	1.24232	0.929835	0.161033	0.969634	0.609148
		CKAP2	1.01748	1.6e-06	0.592546	0.919	0.626459	7e-08	1.14812	0.635706	0.444625	0.451643	0.894305	0.00207265	1.1891	1.70608e-07
		CKAP2L	0.997923	0.0831807	0.548666	0.989	1.21702	3.3e-09	1.12642	1.16585	0.363669	0.466162	0.852665	0.0384433	1.40188	2.08318e-07
		CKAP4	0.974004	3.96e-06	1.95613	0.874	1.56496	1.1e-12	0.890547	2.68378	2.20989	0.962322	0.975569	0.732711	0.83698	0.000143187
		CKAP5	0.850274	0.00029416	0.468786	0.189	0.69596	1.1e-15	1.06394	0.815981	0.488025	0.423184	0.917286	0.00644591	1.03118	0.422393
		CKB	1.02811	0.323737	1.67946	0.964	1.49748	0.18	0.930591	1.26434	0.72131	0.353919	1.0044	0.941887	0.918104	0.0142782
		CKMT2-AS1	1.26663	0.972651	1.16716	0.41	1.01401	0.59	0.970601	0.787581	0.639151	0.774627	1.1042	0.612179	0.875912	0.459309
		CKS1B	0.869947	0.00570508	0.59791	0.357	0.720651	5.3e-06	0.954384	0.532069	0.31879	0.311169	0.688852	7.48947e-20	1.25365	4.68189e-08
		CKS2	1.15029	0.187148	0.75576	0.275	0.858459	0.0074	0.948099	0.575645	0.340412	0.33669	0.892867	0.0488575	0.898112	0.0583353
		CLASP1	1.04608	0.466621	0.784584	0.808	1.11344	0.052	0.960517	0.783101	0.929603	1.05866	1.18068	0.00242966	1.11334	0.0661348
		CLASP2	1.38799	0.0249532	0.591316	0.00709	0.767448	1.6e-06	1.04989	0.83282	0.370985	0.457568	1.09969	0.0447398	0.95421	0.390019
		CLASRP	0.896888	0.0166741	0.803851	0.506	0.744557	0.095	0.822638	0.877973	0.780898	0.977909	0.912877	0.115323	1.35884	2.07004e-11
		CLBA1	1.62563	0.00022304	1.6358	0.0026	1.72253	0.0011	1.09208	1.43502	1.52545	0.96669	1.36503	0.00714099	0.882827	0.386737
		CLCC1	0.836826	0.0375011	0.896267	0.238	0.766148	0.48	0.983498	0.804758	0.666337	0.609233	1.06141	0.497289	0.833419	0.00666805
		CLCN2	0.615572	0.297668	1.07848	0.0436	1.27938	0.8	0.842942	1.0734	1.13006	1.11075	1.13684	0.489892	1.1767	0.333311
		CLCN3	1.21588	0.503521	0.575146	0.107	1.093	2.3e-08	1.02293	0.62526	1.36115	1.62033	1.05454	0.40202	0.848094	0.00076256
		CLCN5	1.07848	0.904332	0.853818	0.675	1.02423	0.27	0.884205	0.779606	0.587695	0.770425	1.03882	0.760905	0.742702	0.000241979
		CLCN6	0.655197	0.740228	1.15349	0.0003	1.0541	0.27	1.03207	1.13746	1.62225	1.69938	0.926636	0.436007	1.35808	1.13073e-05
		CLCN7	1.27544	3.11e-07	1.42208	0.0661	0.567851	0.0022	1.01922	1.0248	1.1267	1.54751	0.943318	0.363975	0.909533	0.0874118
		CLDN12	0.533663	0.000235801	0.662044	6.87e-07	0.636808	0.00097	1.8426	1.99034	1.10261	1.04716	0.555321	3.12687e-20	0.832661	0.0104415
		CLDN15	1.08673	0.45204	1.18099	0.73	1.16117	0.4	1.00451	0.933939	2.21565	1.54951	0.982355	0.887628	0.823582	0.0141721
		CLDND1	1.08222	0.324281	1.089	0.616	0.878705	0.55	0.986966	1.08995	0.840553	1.28063	0.886569	0.0580029	0.818636	0.000480584
		CLEC11A	0.793884	2.4e-12	0.691595	0.157	0.405301	0.0082	0.714885	0.550455	0.524423	0.562261	0.77866	0.154008	0.977955	0.929587
		CLEC16A	1.36794	0.0350037	1.26138	0.0107	1.28239	0.053	0.883421	1.27957	1.23159	1.34643	1.02261	0.828791	0.877178	0.0599416
		CLGN	2.0167	8.14e-07	0.968618	1.04e-05	0.452052	0.9	1.01749	0.366574	1.27023	0.709278	0.961774	0.753433	1.17095	0.0681003
		CLHC1	1.15029	0.100765	2.4863	0.695	1.51914	4.9e-05	1.11879	1.28618	2.20893	1.60839	0.865115	0.487199	0.903268	0.637263
		CLIC1	0.782954	0.000105305	1.12896	0.0345	1.47194	0.32	0.856096	1.91534	1.50066	1.50718	0.783919	4.86319e-06	1.04695	0.52159
		CLIC4	1.20581	3.62e-06	1.29146	0.183	1.6744	0.036	1.25377	1.54536	0.856501	1.1866	1.09931	0.024095	0.740986	2.19185e-16
		CLINT1	1.1235	0.0132802	0.869947	0.401	0.764078	0.26	0.944044	0.82741	0.90559	0.862086	0.958932	0.451487	0.755406	7.58561e-13
		CLIP1	1.27633	0.605941	0.888227	0.0294	1.0714	0.32	1.22848	1.61326	1.85401	1.31193	1.05246	0.529784	1.06306	0.41248
		CLIP2	1.05044	4.8e-05	1.1479	0.787	1.57874	0.32	0.947149	2.08399	0.988495	0.588827	0.88114	0.621123	1.33792	0.136929
		CLIP3	0.862741	6.16e-21	3.41054	0.414	3.07784	1.1e-24	0.927659	1.71431	1.71993	2.13137	1.29926	0.436007	1.60983	0.0844134
		CLIP4	1.17202	0.0296229	1.27544	0.407	0.71659	0.13	1.49006	1.23221	1.12908	1.52314	1.11672	0.414453	0.88897	0.36894
		CLK1	1.33793	0.0179487	1.18017	0.0231	1.32386	0.21	1.10302	1.07341	1.54406	2.60873	0.970639	0.692094	1.07698	0.203738
		CLK2	0.905634	0.557219	0.837987	0.558	0.911446	0.2	0.933155	0.924363	0.973575	0.816106	0.915538	0.0802677	0.660469	2.4843e-23
		CLK3	0.724973	0.861455	0.825878	0.00898	0.969905	0.13	0.777939	1.14706	0.766403	0.92105	0.842911	0.00378631	1.15384	0.014506
		CLK4	1.04536	0.722809	0.843816	0.872	1.08671	0.42	0.977791	0.808865	1.60887	1.46357	1.00227	0.988027	1.10582	0.32332
		CLMN	1.27544	0.000188894	0.853226	0.266	1.87657	0.48	1.30804	1.1841	0.984774	0.852702	1.07658	0.709415	0.76595	0.0712195
		CLN5	1.29146	0.0399487	1.35004	0.421	1.66428	0.29	1.1541	1.10869	1.02433	2.01626	1.07484	0.588609	1.42031	9.84602e-05
		CLN6	0.739694	1.04e-12	0.685867	0.0217	0.453307	0.0014	0.906291	1.01431	0.679162	0.908198	0.874785	0.0302313	0.783813	1.22523e-05
		CLN8	1.15829	0.000236914	1.45902	0.305	1.4944	0.00065	1.0643	1.18207	1.48244	1.18862	0.92827	0.612356	0.789613	0.0325301
		CLNS1A	0.862741	0.00382523	0.865137	0.21	0.755607	0.18	1.20076	1.20375	0.809836	0.91002	0.916899	0.0986096	0.896409	0.024066
		CLOCK	0.639493	0.0270503	0.907519	0.00327	1.37193	0.6	0.951596	1.31896	1.48934	1.34645	1.09191	0.453465	0.964058	0.785978
		CLP1	0.63905	0.133967	0.924663	0.00254	0.795965	0.68	1.0778	0.666852	0.77371	0.537306	0.803223	0.028694	1.0812	0.515949
		CLPB	0.953299	0.324302	0.620284	0.791	0.874235	2.1e-05	0.909858	1.06215	0.854297	0.69981	1.11785	0.0400728	0.77121	6.73224e-08
		CLPP	0.741747	0.756986	0.876606	0.0226	1.05378	0.35	0.819493	0.940397	0.704298	0.546465	0.850633	0.00696886	0.917566	0.192593
		CLPTM1	0.964598	0.224928	0.899378	0.822	0.869055	0.39	0.938874	0.953835	1.08043	0.980381	1.04868	0.460847	0.893577	0.0270776
		CLPTM1L	1.0274	9.09e-24	1.01466	0.878	0.370299	0.93	0.87019	0.936011	1.1979	0.88298	0.952463	0.309227	1.06872	0.116811
		CLPX	0.815637	0.235632	0.861546	0.131	0.856677	0.26	1.08445	0.920197	1.28228	0.931224	1.01739	0.865972	0.940757	0.437055
		CLSPN	0.785128	5.35e-15	0.529976	0.0481	0.45761	4.1e-10	0.971395	0.696538	0.129441	0.391018	0.952497	0.456258	0.792827	8.72956e-07
		CLSTN1	1.01537	3.77e-05	1.18674	0.934	1.52187	0.15	0.814928	1.69639	1.63504	1.56875	1.05782	0.237397	0.869212	0.000290109
		CLSTN2	1.53262	1.66e-30	0.23849	0.00356	0.231582	5.4e-29	1.00771	0.0816267	0.064755	0.0567957	1.49494	0.170714	6.01578	2.09535e-17
		CLSTN3	1.38319	0.00439763	3.29436	0.268	1.92379	2e-08	0.812962	0.403686	1.92717	1.89389	1.09556	0.330404	0.699932	1.24359e-06
		CLTA	1.03455	0.923105	1.17528	0.85	1.0185	0.21	0.977973	1.21567	0.958065	1.09246	0.895372	0.0343599	1.02437	0.730701
		CLTB	0.890076	0.979459	1.49278	0.807	0.986315	0.25	0.77402	1.73035	1.34979	1.64815	0.944387	0.444855	1.0068	0.943879
		CLTC	0.856188	0.294161	0.895025	0.153	1.11848	0.3	1.08635	1.14599	1.13158	1.11269	0.92274	0.00867389	0.814213	2.07965e-14
		CLTCL1	0.618995	0.916698	1.11034	0.0239	1.03269	0.68	1.04601	2.16492	0.853802	1.02117	0.94844	0.613217	1.26482	0.00100649
		CLU	1.5042	3.22e-22	1.47019	5.48e-05	2.39737	6.2e-05	1.13415	1.75468	1.0016	3.8119	0.920864	0.76749	1.65605	0.00378707
		CLUAP1	1.13918	0.162221	1.32869	0.506	1.2478	0.062	1.10022	1.04483	0.853172	0.568269	1.10709	0.585689	1.19985	0.238449
		CLUH	0.719467	5.43e-19	0.463294	0.00737	0.393965	3.7e-13	0.909759	0.918412	0.762074	0.546702	1.00607	0.921613	1.00232	0.970158
		CLUHP3	0.63728	0.962285	0.803294	0.132	0.979557	0.49	1.15929	0.853785	0.461138	0.414876	1.11931	0.382876	0.658426	3.11555e-05
		CLVS2	0.893785	0.000679171	0.636839	0.572	0.622505	0.0014	1.26693	0.734657	0.605807	0.741458	1.05892	0.880913	1.06007	0.876521
		CMAS	0.668037	0.962168	0.924023	0.0014	1.01008	0.62	0.965163	1.12806	0.746703	0.476421	0.869819	0.0507868	0.788019	0.000198645
		CMBL	0.921464	0.884857	0.82302	0.718	0.966146	0.27	1.04094	0.334001	0.452957	0.730054	1.29678	0.00566234	0.863401	0.167658
		CMC1	1.13524	0.329478	0.963262	0.544	0.83809	0.87	0.975078	1.05234	0.583423	0.380846	1.1263	0.334903	0.916394	0.503156
		CMC2	1.17365	0.108429	0.835088	0.375	0.782371	0.27	1.05819	0.980737	0.642656	0.724679	1.00969	0.966427	1.39608	0.00912902
		CMIP	1.25788	0.0546886	1.36509	0.137	1.30282	0.021	0.790823	1.79201	1.38397	0.814524	1.02963	0.780644	0.999777	0.99816
		CMPK1	0.464258	0.886065	0.752102	3.59e-11	1.02739	0.021	1.13846	1.62606	1.61224	1.24462	0.743646	8.18989e-10	0.871086	0.00893532
		CMSS1	1.27368	0.00233771	0.744839	0.0524	0.714988	0.009	0.906001	0.837702	0.630142	0.459632	0.899629	0.070713	1.11149	0.0595416
		CMTM3	1.04464	6.23e-09	2.38171	0.83	1.9849	9e-14	0.797914	2.09565	3.15304	4.51892	0.899944	0.362646	0.814885	0.0352777
		CMTM4	0.842647	5e-07	0.829895	0.186	0.598477	0.11	1.06326	0.782713	0.258634	0.488239	1.11919	0.0357886	0.72626	1.21555e-11
		CMTM6	1.12975	0.17046	0.911301	0.361	1.17084	0.48	0.988206	1.53946	1.11674	1.61541	0.957169	0.500715	0.711126	4.20048e-14
		CMTR1	0.856782	0.230702	1.13682	0.314	1.17916	0.38	0.894864	1.13481	0.975888	1.14111	1.0823	0.150097	0.939485	0.270015
		CMTR2	1.04102	0.327207	1.11806	0.856	0.852046	0.53	1.33901	1.26508	0.868935	0.69428	1.40454	0.00486201	0.746613	0.0219736
		CNBP	1.07475	0.681027	0.90689	0.593	0.947142	0.4	0.982336	0.854653	1.3119	1.06975	0.896236	0.000378187	0.986248	0.761599
		CNDP2	1.02669	7.7e-05	1.457	0.876	1.49136	0.00023	0.915604	1.70007	1.7654	0.920237	0.991078	0.939129	0.809618	0.00178008
		CNEP1R1	1.48452	0.893948	1.23029	0.00682	1.02981	0.18	0.758558	1.34782	1.06104	1.15753	0.980644	0.93469	0.671626	0.00484463
		CNIH1	0.96929	0.237628	0.869345	0.846	1.14468	0.22	0.970178	0.91969	0.452291	0.448103	0.887951	0.0151477	0.95947	0.489909
		CNIH2	0.745355	0.80959	1.26751	0.286	1.07911	0.35	0.96377	0.513118	0.313324	0.506125	0.933252	0.851898	1.65901	0.0265744
		CNIH3	0.831046	4.17e-05	1.02883	0.61	2.56163	0.95	0.561563	1.13963	2.41723	1.2748	1.23833	0.515221	1.26388	0.446749
		CNIH4	1.24487	0.333867	1.19251	0.124	0.869569	0.2	0.772206	1.08251	1.04622	0.809403	0.981072	0.829758	1.08282	0.204557
		CNKSR3	1.27899	1.94e-13	2.05908	0.154	2.6136	8.5e-08	1.26079	1.76981	1.29624	7.84911	1.05088	0.766488	0.907784	0.495158
		CNN2	0.868742	0.00018396	2.18707	0.226	0.70851	6.5e-20	0.878775	1.73813	1.10478	3.75713	0.551728	3.83093e-16	0.96316	0.744397
		CNN3	1.19003	5.23e-12	2.0691	0.127	1.85194	2.3e-16	1.01607	2.24534	1.35171	2.61162	0.911794	0.0868355	0.972595	0.684711
		CNNM2	0.925304	0.0407111	1.34443	0.776	0.68226	0.12	0.95252	1.15704	1.43246	1.1884	1.01166	0.94207	1.2879	0.00549008
		CNNM3	1.17283	0.850399	0.882703	0.344	0.962406	0.45	0.851649	0.642045	0.82976	1.06813	1.15144	0.0283862	0.813974	0.00065909
		CNNM4	1.08147	0.0935123	0.792235	0.701	0.778429	0.13	0.941046	0.80021	0.55468	1.18177	1.01018	0.937939	1.41756	4.63061e-07
		CNOT1	1.04681	6.94e-05	0.492775	0.809	0.631199	2.6e-10	1.13164	0.703032	0.58569	0.491951	1.1118	0.0016042	0.873422	2.24642e-05
		CNOT10	1.08373	0.164895	1.01607	0.622	0.837067	0.93	1.03961	0.704266	0.83397	0.875577	1.02068	0.826646	0.82848	0.00113854
		CNOT11	1.10267	0.0214849	0.768438	0.546	0.756733	0.032	0.732364	0.868564	0.820595	0.799709	1.06689	0.293636	0.859972	0.00305885
		CNOT2	1.07326	0.711314	1.24487	0.627	1.0542	0.04	0.989768	0.951782	1.18566	1.22555	0.92744	0.296074	0.789765	3.21198e-05
		CNOT3	0.827023	0.258386	0.898755	0.12	0.873158	0.4	0.886062	0.881106	0.906377	0.982434	0.878583	0.00707752	1.19537	5.03879e-05
		CNOT4	1.05995	0.811336	0.940174	0.792	0.95077	0.76	1.00033	1.01477	0.932711	0.833793	0.957564	0.664463	0.940433	0.489488
		CNOT6	0.902501	0.0291562	0.786762	0.51	0.772846	0.046	0.919365	0.487138	0.457171	0.423284	1.00652	0.936284	0.860119	0.00115495
		CNOT6L	1.02527	8.66e-05	0.908148	0.933	0.50589	0.69	1.15922	0.9544	1.51873	1.03054	1.12444	0.139146	0.739928	8.08259e-06
		CNOT7	1.1591	0.00984499	0.691116	0.216	0.772341	0.00012	1.00903	0.679889	0.468168	0.504519	1.03473	0.656558	0.836443	0.00061568
		CNOT8	0.957271	0.19279	0.936272	0.824	1.19702	0.7	1.10435	0.514023	0.838451	0.612806	0.864166	0.0340745	0.891648	0.104421
		CNOT9	0.963262	0.00681592	0.549427	0.815	0.756775	5.1e-10	0.980958	0.976832	0.941661	0.773048	0.994287	0.944266	0.927348	0.153673
		CNP	0.843816	0.307432	1.19334	0.214	1.1435	0.16	0.893616	1.12559	0.805726	0.681948	1.03892	0.585997	1.09431	0.0958297
		CNPPD1	0.927873	0.834773	1.32593	0.704	0.959167	0.041	0.783961	1.22108	0.829425	0.633632	1.00069	0.996699	0.741136	0.00173331
		CNPY2	1.5977	0.736015	1.84933	0.101	1.12602	0.014	0.952766	1.23409	1.50705	1.37633	0.941751	0.827256	0.891534	0.626394
		CNPY3	0.887611	0.131965	1.38511	0.488	0.810128	0.011	0.801416	1.01229	1.08867	0.964498	0.934648	0.537462	0.837834	0.0377296
		CNPY4	0.703684	0.0247225	1.33237	0.0586	1.44103	0.095	1.0219	1.00351	0.583375	0.70139	0.967013	0.875947	0.928164	0.691927
		CNRIP1	0.891929	0.0010791	1.33053	0.59	0.61235	0.072	1.03424	1.38731	3.30612	3.69618	0.885032	0.449084	0.9177	0.607378
		CNST	1.28788	1.8e-07	1.07475	0.0499	1.74256	0.64	1.19726	1.60994	1.39728	1.50961	0.902797	0.420623	0.772729	0.0110611
		CNTLN	1.10496	0.299155	0.888843	0.677	0.817947	0.59	0.989479	1.19451	0.661063	1.0254	1.17607	0.171384	0.912053	0.490421
		CNTNAP1	0.573156	0.000618885	1.20832	0.00201	1.73531	0.34	0.809691	4.70759	3.63939	2.4471	1.1575	0.331434	0.961717	0.837196
		CNTNAP2	1.21841	1.35e-69	0.26334	0.134	0.147397	5e-36	1.14234	0.0576509	0.217482	0.275394	1.39873	0.000489054	0.784322	0.0202036
		CNTRL	1.11034	0.00557454	0.45376	0.619	0.66177	2.2e-08	0.952256	0.473323	0.331215	0.526393	1.03671	0.774112	1.05655	0.620739
		CNTROB	0.862144	0.902796	0.819605	0.278	0.978658	0.094	0.942046	0.928711	0.623052	0.829597	0.880506	0.0253728	1.15098	0.0086751
		COA1	0.804966	0.00341843	0.70907	0.0862	0.726112	0.0016	1.01628	0.80651	0.524194	0.608494	0.958615	0.611093	0.941977	0.413929
		COA3	0.794434	0.241128	0.747425	0.176	1.20548	0.054	0.898254	0.555697	0.35914	0.506082	0.924732	0.315203	0.984165	0.874109
		COA4	0.809442	0.00152496	0.845572	0.142	0.68236	0.23	0.934566	1.17331	0.402654	0.308312	0.848039	0.0119583	0.875745	0.0463929
		COA5	0.946714	0.107697	1.21419	0.794	1.25967	0.2	1.17106	0.675922	1.19506	0.63727	1.04712	0.693792	0.823489	0.0206303
		COA6	0.875998	0.0241111	0.659297	0.481	0.721813	0.0032	0.816613	0.406088	0.503545	0.320902	0.840732	0.11337	0.881475	0.266105
		COA7	1.11961	7.34e-07	0.630689	0.43	0.599084	1.2e-05	0.942768	0.882916	0.910678	0.955664	0.931949	0.210983	0.695827	1.18909e-16
		COA8	1.45095	0.0121911	1.40834	0.0466	1.52314	0.051	1.06804	1.17397	1.07302	0.70328	0.90129	0.621891	1.18004	0.353959
		COASY	0.865137	0.969635	0.815637	0.249	0.992913	0.06	0.949732	0.623549	0.78009	0.594237	0.903352	0.0439807	0.929381	0.162045
		COBLL1	0.817902	0.466084	1.56374	0.429	0.839804	0.021	1.53859	3.65556	1.41086	1.70852	0.909938	0.515354	0.869781	0.273608
		COCH	0.740207	2.09e-19	0.657471	0.0186	0.376422	0.00023	1.08534	0.65325	0.143348	0.314148	1.12869	0.255097	0.78812	0.00967613
		COG1	0.596668	0.903319	0.899378	0.000423	1.02737	0.56	0.840466	1.50469	0.929487	1.1402	0.852378	0.0669789	0.989547	0.937632
		COG2	0.924023	0.150571	0.632878	0.725	0.78746	0.0028	1.17758	0.787997	1.18381	1.01738	0.956998	0.617063	0.992527	0.942927
		COG3	1.05775	0.360592	1.02314	0.766	0.872946	0.91	1.02421	1.28382	1.62258	1.3728	0.95739	0.705466	0.892183	0.202106
		COG4	0.907519	0.316871	0.957271	0.488	1.12891	0.77	0.920768	0.768862	1.43486	1.29774	0.983142	0.867933	1.11359	0.110024
		COG5	0.855002	0.477614	0.857376	0.256	0.905229	0.23	0.948599	1.46002	1.17837	0.959587	0.950683	0.647596	0.964894	0.751352
		COG6	0.465225	0.141701	1.12194	1.03e-09	1.22057	0.46	1.05922	1.37373	2.30217	1.03906	0.617707	2.11033e-09	0.794312	0.00825079
		COG7	1.03168	0.259909	0.721464	0.876	0.850581	0.011	1.05038	0.565683	0.712502	0.74206	0.914845	0.515568	1.77063	1.93515e-10
		COG8	1.05702	0.536561	0.955945	0.841	0.871248	0.86	0.986096	0.849068	1.25633	1.02165	0.90689	0.546513	0.641848	0.000183152
		COIL	1.23285	0.733	1.09202	0.159	0.941163	0.6	0.993069	0.646819	0.819567	0.637227	0.978533	0.80666	0.945051	0.421079
		COL11A2	0.900626	3.43e-08	2.21453	0.844	4.81239	0.013	1.04957	1.05011	2.96768	4.44166	1.00284	0.99381	1.69946	0.00487742
		COL13A1	1.10114	0.0472463	1.04247	0.89	2.392	0.95	0.862353	2.35458	0.844955	0.138971	1.13748	0.668993	1.18012	0.542999
		COL18A1	1.17446	5.49e-14	13.306	0.45	2.85785	1.4e-85	0.685272	10.3066	4.61354	2.41941	1.11018	0.0894953	0.867023	0.0129827
		COL1A1	2.15099	5.85e-08	14.8872	0.00633	3.78184	2.6e-30	0.966497	16.7628	12.3249	17.7584	0.977381	0.897478	1.34198	0.00558046
		COL25A1	1.89343	1.34e-20	2.99592	0.00428	5.66008	1.7e-08	1.13115	0.932915	0.970637	1.39092	1.47788	3.81389e-05	0.801522	0.0403533
		COL26A1	1.12896	0.734417	20.7494	0.924	1.41863	6.4e-06	0.569083	11.8109	20.7704	1.51034	1.02574	0.939129	0.930393	0.809197
		COL27A1	0.511569	0.0294598	0.97942	1.28e-06	0.734855	0.92	0.778487	1.98273	2.01469	1.22455	0.976237	0.881553	1.08651	0.511587
		COL2A1	0.676424	1.53e-08	2.62806	0.322	4.35654	0.0005	0.603091	3.06493	1.66478	0.846501	0.79623	0.00031204	0.758373	6.66779e-06
		COL4A1	1.36699	1.46e-38	4.30496	0.00299	3.17726	4.1e-61	0.8503	3.75874	3.2458	2.97985	1.37803	8.14774e-07	0.774913	0.000261012
		COL4A2	1.16231	5.3e-15	3.12748	0.289	2.24851	5.6e-29	0.975828	4.6054	1.79824	2.28729	1.35681	6.13485e-07	0.815616	0.00175471
		COL5A1	1.22095	6.15e-29	6.42635	0.0907	2.78265	6.4e-95	0.889051	6.00548	8.28755	9.13062	1.58318	1.10296e-06	0.82965	0.100973
		COL5A2	1.38319	8.84e-17	2.58291	0.0013	2.07477	8.2e-28	1.04912	4.67676	2.95637	5.68351	1.46222	0.111397	1.99906	0.000625948
		COL6A1	1.2492	1.64e-74	4.84333	0.132	7.47577	8.9e-46	0.695558	14.5921	10.0991	5.65479	1.1382	0.00773044	0.932606	0.200516
		COL6A2	1.47529	2.4e-84	6.10081	0.00739	10.079	1.1e-51	0.7496	24.4021	10.3271	4.47619	1.06794	0.492444	1.18951	0.0178546
		COL7A1	1.64035	6.64e-06	4.49089	0.166	3.60191	9e-08	0.700167	4.97563	5.9018	4.29795	1.15965	0.224242	2.1294	1.86742e-17
		COL9A2	0.819037	1.81e-05	2.44189	0.424	2.0991	1.7e-07	1.02545	1.11269	0.841633	2.78013	1.07379	0.875527	1.25654	0.522971
		COL9A3	0.899378	1.01e-45	4.92117	0.579	5.28464	1.1e-41	0.859775	2.70205	1.7112	2.86695	0.84082	0.636099	1.73368	0.0317952
		COLEC12	2.07628	2.5e-08	5.1124	0.000852	2.91551	1.1e-18	0.926188	4.23563	4.94729	21.2073	1.45281	3.09709e-06	0.670042	1.82172e-06
		COLGALT1	1.30677	0.232852	0.645281	0.0506	1.1793	0.00021	0.960154	1.79166	1.80033	1.80398	1.28666	1.46782e-08	1.03491	0.594192
		COLGALT2	0.890693	0.0097905	0.591316	0.501	0.716495	2.1e-05	0.988104	0.740113	0.664249	0.354334	1.30297	0.0354942	0.974424	0.894542
		COMMD1	0.98214	0.526443	1.18756	0.937	1.11426	0.27	0.886786	1.02483	0.897656	0.863183	1.09215	0.67607	0.985002	0.951321
		COMMD10	1.59992	2.08e-06	0.863938	0.000817	0.533969	0.38	1.03974	0.784821	0.73646	0.612786	1.28462	0.199201	1.0709	0.782914
		COMMD2	1.11497	0.605715	1.04681	0.514	0.919653	0.8	1.01803	0.961056	0.91127	1.07996	0.926961	0.311114	0.720896	1.26596e-08
		COMMD3	1.47121	0.590322	1.28967	0.037	0.887534	0.17	0.957915	0.699391	0.814667	0.618268	1.26854	0.444803	1.04983	0.901335
		COMMD4	1.089	0.847532	1.08373	0.587	0.967524	0.58	0.970628	0.695017	0.486825	0.767144	1.02831	0.677427	0.802288	4.92816e-07
		COMMD5	0.925304	0.925226	1.05044	0.692	0.979338	0.8	0.943798	0.983276	0.822824	0.86693	0.90339	0.392767	0.757999	0.00321198
		COMMD6	1.33237	0.0811961	1.57243	0.064	1.28814	0.00066	1.20964	1.1273	1.07849	0.961057	1.15659	0.0410447	0.997865	0.986446
		COMMD7	1.46206	0.0294478	2.54383	0.0262	1.41382	3e-11	#VALUE!	#VALUE!	#VALUE!	#VALUE!	1.08061	0.688002	1.13698	0.4395
		COMMD8	1.41519	0.626194	0.612168	0.0171	1.09116	0.00026	1.0915	1.13585	0.870321	0.88721	1.11278	0.5219	0.775248	0.0608687
		COMMD9	1.12584	0.758735	1.07177	0.37	1.04626	0.61	0.93656	0.751186	0.834609	0.941655	0.907539	0.271083	1.06453	0.500018
		COMT	1.00417	0.455303	1.65405	0.984	1.11686	8.2e-06	0.859879	1.69092	2.28349	2.68538	0.843599	0.00435341	1.15623	0.0138246
		COMTD1	0.657927	0.210959	2.72452	0.213	1.44271	4.2e-05	0.780156	4.08898	1.11515	3.89944	1.15422	0.0683604	0.763938	0.000132449
		COP1	1.03598	0.438608	1.07998	0.852	1.11936	0.63	1.01174	1.05561	0.880642	0.73043	1.07106	0.470625	0.927165	0.40126
		COPA	0.957935	0.50629	1.35472	0.77	1.08455	0.0013	0.955989	1.84656	2.12678	2.28966	0.829606	8.72889e-09	0.939799	0.101457
		COPB1	0.966606	0.131729	1.19665	0.825	1.17096	0.08	1.1061	1.88246	1.38305	1.3942	0.890267	0.00819076	0.965578	0.527026
		COPB2	0.905006	0.188354	1.13603	0.413	1.14655	0.23	1.08423	1.68205	1.6477	1.6767	0.893533	0.00237724	0.928288	0.0564069
		COPE	1.1479	0.0516418	1.42504	0.383	1.28379	0.0036	0.924245	1.18688	1.54749	1.16731	0.854458	0.00520046	1.00741	0.936578
		COPG1	0.823591	0.0012078	1.36888	0.0889	1.36911	0.0012	0.994389	2.25927	2.35303	1.93133	0.846647	8.10191e-05	1.09927	0.0350576
		COPG2	1.07848	0.447369	0.889459	0.699	0.882644	0.49	1.1672	0.79326	0.819	1.50984	1.08214	0.38279	0.794901	0.00120416
		COPRS	0.940826	0.185374	1.08975	0.791	0.801896	0.67	1.04766	1.22817	0.696163	1.00228	0.899813	0.140347	1.30387	4.27653e-06
		COPS2	1.22434	0.654572	0.791137	0.0801	1.0632	0.025	0.642983	0.924906	0.890181	0.914708	0.964475	0.622296	0.804735	1.34233e-05
		COPS3	0.989657	0.324412	0.767373	0.951	0.892317	0.0077	1.01279	0.757485	0.751275	0.849035	0.888654	0.0071675	1.35111	1.75629e-15
		COPS4	0.895025	0.270396	0.778625	0.497	0.85797	0.05	1.10016	0.870259	0.826209	0.871637	0.890868	0.117249	1.0962	0.212867
		COPS5	1.02527	0.143663	0.929805	0.892	1.19419	0.62	1.05425	0.768199	1.79712	1.17435	1.0517	0.590701	0.988196	0.915165
		COPS6	0.699793	0.437778	0.829895	0.00109	0.904864	0.098	0.928064	0.94346	0.661078	0.512745	0.843912	0.000257031	0.951965	0.397063
		COPS7A	0.721965	0.0435314	0.6685	0.0081	0.786069	0.00031	0.865891	0.993499	0.372368	0.329678	0.969676	0.732711	0.898354	0.103861
		COPS7B	1.0519	0.08151	0.732043	0.756	0.81822	0.004	0.954426	0.811692	0.794012	0.843361	0.979155	0.809834	0.792694	1.21078e-05
		COPS8	0.988286	0.473473	0.959929	0.954	0.902182	0.81	1.03818	1.15257	1.00228	0.83248	0.92823	0.247374	0.968177	0.664528
		COPS9	1.15349	0.34873	1.13603	0.393	1.15421	0.42	0.980955	1.00521	0.854491	0.696293	0.7916	0.00609518	1.00288	0.98479
		COPZ1	1.09051	4.17e-06	0.99447	0.495	0.661271	0.97	1.03009	0.899813	1.20439	1.24594	1.09377	0.0243356	1.08916	0.0291863
		COQ10A	1.69584	0.433621	1.42011	0.00103	1.16248	0.03	1.10384	0.969403	0.531371	1.84256	1.04685	0.798482	0.707146	0.00310078
		COQ10B	0.865737	0.000277373	1.31403	0.464	1.66605	0.082	0.991656	2.08063	3.49741	3.90148	0.711029	0.00101337	0.934996	0.634697
		COQ2	1.25093	0.872693	0.775931	0.216	0.963145	0.13	1.22731	0.534356	0.678135	1.00733	1.27653	0.00422827	1.00182	0.991248
		COQ3	0.77164	7.75e-10	0.470739	0.194	0.374052	4e-06	0.980649	0.527887	0.371215	0.302708	1.04181	0.775851	0.878582	0.237735
		COQ4	0.842647	0.407431	1.02243	0.242	0.886908	0.91	0.91375	0.966877	1.08652	0.804216	0.89762	0.116355	0.672253	2.48918e-12
		COQ5	0.88454	0.188964	0.662963	0.448	0.836007	0.00069	0.943768	0.735691	0.505085	0.540047	1.06433	0.626752	1.1522	0.161327
		COQ6	0.940174	0.468505	0.918913	0.849	1.19687	0.77	0.975072	1.00928	0.733765	0.864325	1.05009	0.868304	0.675673	0.0479515
		COQ7	0.924663	0.95931	0.77164	0.745	0.985907	0.15	0.954754	0.606511	0.250941	0.493323	0.977957	0.857959	0.76802	0.00048422
		COQ8B	0.899378	0.352821	0.93045	0.552	1.15194	0.68	0.996934	0.666501	1.20739	0.802187	1.01807	0.889763	0.895693	0.231047
		COQ9	1.06733	0.669884	0.738157	0.719	0.93189	0.015	0.937548	0.872594	0.893907	0.583786	1.14562	0.0695305	0.832325	0.00986473
		CORO1A	0.862741	1.47e-06	1.50316	0.691	2.90481	0.13	0.728312	1.25618	0.515725	0.561463	0.755405	0.22484	1.11521	0.683609
		CORO1B	0.77164	0.306091	1.12272	0.0351	1.14088	0.38	0.965105	1.38617	0.6423	0.812688	0.936772	0.352454	1.02744	0.738764
		CORO1C	0.99585	0.372373	1.14393	0.978	1.10401	0.19	0.934882	2.39173	1.11177	2.66494	0.958653	0.452269	0.763239	8.1297e-12
		CORO2A	2.14058	1.94e-17	4.76673	0.000442	4.78346	3.8e-17	1.14604	2.73238	1.04411	0.984592	1.35699	0.097066	1.09681	0.698837
		CORO6	0.72749	0.00761791	0.972655	0.135	0.613982	0.92	0.886116	0.916919	0.412711	1.4331	1.32719	0.0408076	0.814254	0.171042
		CORO7	1.08824	0.684074	1.11265	0.852	0.852417	0.8	0.760159	1.2922	1.35672	1.18536	0.873765	0.617554	1.01935	0.95244
		COTL1	0.904379	7.29e-21	2.28628	0.531	2.65569	4.8e-15	0.969217	8.83828	3.30846	1.75716	1.13772	0.0185208	1.0891	0.140686
		COX1	1.22434	0.0105188	1.21419	0.111	0.754086	0.1	1.22998	1.30508	1.11557	0.804547	1.02887	0.787058	1.22069	0.0023002
		COX10	1.25614	0.0179406	0.687771	0.123	0.732723	0.0039	1.13799	0.838998	0.881449	0.740221	1.1058	0.266791	0.958692	0.695108
		COX10-AS1	1.11574	0.433857	0.743807	0.705	1.20529	0.19	1.18105	1.05495	0.443582	0.464913	0.976169	0.867933	0.615586	1.05815e-08
		COX11	1.12272	0.575673	0.568803	0.403	0.925255	2.3e-08	0.942863	0.516135	0.485827	0.407177	1.11746	0.035111	0.898592	0.041135
		COX14	1.07848	0.176422	1.71832	0.804	1.33397	0.0045	1.09283	1.10674	0.66171	0.66979	0.881675	0.545284	0.962069	0.873757
		COX15	1.14393	0.338331	0.869345	0.399	0.869516	0.34	0.959342	0.659739	0.873053	0.669288	1.17812	0.0211987	0.712436	2.17018e-07
		COX17	1.10343	0.20393	0.694959	0.599	1.20862	0.0081	0.974329	0.655741	0.703705	0.472297	0.908346	0.312304	0.959973	0.713249
		COX18	1.26663	0.803009	0.945402	0.239	1.06226	0.82	1.144	0.913963	0.879114	0.663092	1.19837	0.0757831	0.978469	0.885514
		COX19	1.1487	0.167615	1.27191	0.434	1.22764	0.098	0.92786	0.944971	0.83524	0.953241	0.874035	0.248543	0.927474	0.556146
		COX2	1.14314	0.000170871	1.01889	0.252	0.707702	0.9	1.08714	1.04153	0.707368	0.529557	1.08393	0.00911015	1.03278	0.370204
		COX3	1.3632	0.0131555	1.29235	0.0138	0.747064	0.033	1.14156	1.10966	1.01008	0.697273	1.06058	0.340458	0.909312	0.0662277
		COX4I1	0.981459	2.37e-13	1.04464	0.924	0.466951	0.79	1.00795	0.798553	0.887703	0.708896	0.911855	0.0297415	1.29095	7.17073e-13
		COX5A	0.843231	0.00109278	0.864537	0.173	0.714589	0.22	0.954227	0.799324	0.670997	0.533321	0.874322	0.000338835	1.09753	0.0158828
		COX5B	0.857376	0.564087	0.866938	0.258	1.08567	0.26	1.00427	0.789201	0.739098	0.511945	0.875355	0.0350515	1.09934	0.142547
		COX6A1	1.12662	0.929672	1.18756	0.611	1.02493	0.39	0.994312	0.790608	0.695358	0.532284	0.881667	0.586041	1.25104	0.232891
		COX6B1	1.11188	0.527889	0.984866	0.435	1.08681	0.93	0.966909	0.825457	0.851682	0.52764	1.00455	0.962897	1.05538	0.429485
		COX6C	1.20247	0.000501823	1.30495	0.242	1.54406	0.049	1.00094	0.994763	0.815387	0.721877	0.899172	0.289	1.2186	0.0168052
		COX7A2	0.959929	0.00771058	1.00069	0.81	1.33806	1	0.956255	0.954498	0.845316	0.529012	0.919909	0.171034	1.29351	6.89505e-08
		COX7A2L	1.23713	0.177167	1.13367	0.0585	1.16069	0.28	1.01723	0.959993	0.299061	0.195232	0.977768	0.784901	0.982539	0.830385
		COX7B	0.951978	0.0218921	0.758384	0.787	0.758948	0.022	1.10617	0.602618	0.802736	0.536414	0.875161	0.0037671	1.34191	3.04509e-13
		COX7C	0.895025	0.0546856	0.817902	0.464	0.794563	0.1	0.911584	0.432002	0.636762	0.489661	0.938515	0.195845	1.05882	0.229511
		COX8A	1.11111	0.726071	0.909408	0.578	1.06903	0.6	0.8567	0.859167	0.666367	0.629466	0.758851	0.0967158	0.98121	0.939141
		CPD	1.03455	0.755774	1.28877	0.843	1.04852	0.02	1.05058	1.49052	2.36397	1.93206	1.14234	0.0100942	0.925356	0.17199
		CPE	1.01537	1.89e-09	1.42405	0.936	1.84673	0.0012	0.974582	1.89858	1.31633	5.14331	1.11119	0.148334	1.07196	0.371344
		CPEB2	0.99654	0.330092	0.653383	0.988	0.865725	0.00056	0.999715	1.16938	1.67707	0.986838	1.07747	0.658239	0.841099	0.200556
		CPEB4	2.09072	0.0869814	1.264	0.0196	1.6994	0.54	1.15477	2.58847	2.71207	1.54467	0.990423	0.948441	1.20899	0.0317333
		CPLANE1	1.02527	0.00980253	1.11574	0.907	1.39692	0.5	1.09039	1.49374	0.629939	1.46485	1.19941	0.0586112	1.05463	0.668284
		CPLANE2	0.840314	0.00366918	1.1321	0.675	2.17488	0.76	0.925996	1.23138	0.908011	0.577445	1.20369	0.520824	0.819897	0.474168
		CPLX1	0.662044	0.366422	1.62225	0.102	0.793478	0.024	1.41786	1.2491	1.52829	1.72623	1.00907	0.964835	0.679079	0.000796884
		CPM	3.00008	7.45e-29	4.01946	2.16e-10	5.8666	1.2e-17	1.5082	7.04105	3.22043	12.2672	0.898686	0.642913	3.70964	4.96241e-23
		CPNE1	1.06216	0.00261226	1.06585	0.7	0.727834	0.66	0.867072	1.39596	0.809106	0.734188	0.935145	0.335275	1.0171	0.844773
		CPNE2	1.07029	8.29e-07	1.25527	0.715	0.554644	0.093	0.953438	2.87471	0.984685	2.34128	1.02521	0.870394	1.09822	0.421319
		CPNE3	1.08448	0.238832	1.36888	0.581	1.15127	0.0025	0.884646	1.05865	0.679468	0.688555	1.1319	0.00616865	0.701369	3.99687e-18
		CPNE7	0.726986	6.82e-07	0.843231	0.021	0.554566	0.23	0.976051	0.649648	0.488069	0.349718	1.60149	2.20219e-05	2.86758	4.00523e-26
		CPOX	1.03886	0.657962	1.28967	0.865	0.920116	0.086	0.976799	0.55127	1.87826	1.96897	1.15646	0.0235685	0.653715	1.12369e-13
		CPSF1	0.713507	0.0516015	1.0196	0.00392	0.797813	0.91	0.972366	0.982641	0.818867	1.03589	0.942167	0.217968	1.01846	0.757045
		CPSF2	1.00278	3.77e-09	0.625465	0.986	0.585645	3.6e-07	1.01242	0.714692	0.629475	0.620231	1.11607	0.0285579	0.817794	9.51351e-06
		CPSF3	1.07848	0.158541	0.712025	0.589	0.855913	0.00054	1.12558	0.674734	0.663814	0.506888	0.959169	0.592654	0.866673	0.0115304
		CPSF4	0.802181	0.000150564	0.782954	0.117	0.642416	0.054	0.86258	0.886241	0.443097	0.849709	0.948018	0.550375	0.913958	0.236365
		CPSF6	0.865737	0.0312856	0.746389	0.222	0.805598	0.0024	0.971333	0.596915	0.750491	0.731388	0.915322	0.038541	0.774552	2.98645e-12
		CPSF7	0.921464	0.00276515	0.786217	0.531	0.752687	0.014	0.89128	0.831771	0.576855	0.922095	0.98298	0.776773	0.83194	6.51471e-07
		CPT1A	0.951978	1.6e-06	1.15109	0.763	1.61419	0.25	0.885679	4.42262	1.1721	0.682623	0.869318	0.0757073	0.770929	0.000191714
		CPT1C	0.590087	0.232183	1.50629	0.00586	0.78863	0.02	0.81436	0.426917	0.455765	0.388495	1.10238	0.675314	2.47298	9.63731e-11
		CPT2	0.939523	0.829516	0.682074	0.83	1.06	0.051	1.01838	0.747963	0.487165	0.455973	1.09563	0.50708	0.851601	0.174656
		CPTP	0.861546	0.555746	1.29235	0.426	1.11368	0.093	0.898931	1.37051	0.806481	1.17997	0.902209	0.365531	1.04883	0.710704
		CPVL	1.07549	0.0452818	1.457	0.613	0.807195	0.00012	0.826059	0.874549	0.810259	1.88254	0.992901	0.961313	1.08526	0.422393
		CRABP2	1.07475	1.21e-17	5.1551	0.878	7.49473	1.3e-11	1.06403	3.76702	3.57526	7.55212	0.928992	0.721986	1.33074	0.0460482
		CRACD	1.48865	0.0382956	1.04536	0.0414	1.454	0.87	0.894629	1.17581	0.779996	0.605788	1.18012	0.186411	0.978523	0.902907
		CRACR2B	0.667112	0.00590597	2.73208	0.342	2.31742	0.00077	0.746361	1.54974	1.1038	0.723374	1.29248	0.333578	2.94509	1.10108e-08
		CRADD	0.784584	0.734168	0.951318	0.39	1.10714	0.88	0.981321	1.56344	0.530324	0.577103	0.809695	0.402897	0.911817	0.747397
		CRAMP1	1.02314	0.775202	1.13446	0.917	1.05589	0.44	0.947601	1.00196	1.10301	0.914362	0.858514	0.0770309	1.13943	0.124068
		CRAT	0.700278	0.385395	1.30677	0.0345	0.855067	0.094	0.976802	2.21413	1.08127	1.46025	0.976717	0.87121	1.09265	0.425405
		CRBN	1.39474	0.47941	1.13288	0.0151	1.11863	0.42	1.05744	0.727091	0.653568	0.648022	1.02398	0.8696	0.803853	0.0187371
		CRCP	1.30224	0.246793	0.882703	0.0487	0.853405	0.39	0.919814	0.824954	0.597178	0.731153	0.909685	0.318173	0.932824	0.478451
		CREB1	1.12272	0.000978128	0.912565	0.413	0.703399	0.51	0.976777	0.860345	1.22122	1.17819	1.07165	0.359022	0.684151	2.54272e-11
		CREB3	0.929161	5.72e-06	1.64262	0.709	1.75406	8.3e-05	0.931244	2.18418	1.77744	1.72111	0.958567	0.692508	0.966569	0.750891
		CREB3L1	1.14393	9.48e-19	12.0587	0.505	3.13187	9.1e-90	0.762266	17.1222	9.38901	7.12018	0.677233	0.19651	0.953077	0.907067
		CREB3L2	1.18921	6.72e-07	2.16595	0.266	1.78966	1.7e-11	0.958395	2.9608	2.90554	2.57853	0.978055	0.718476	0.765686	2.93093e-12
		CREB3L4	1.18921	0.545252	1.69349	0.552	1.17741	0.012	1.23099	0.637173	0.9058	0.649181	1.05337	0.844524	0.951381	0.847258
		CREB5	1.93053	0.183561	1.19334	5.11e-06	1.24266	0.31	0.930728	0.86061	1.20374	12.5044	0.711228	4.94e-09	0.918935	0.242478
		CREBBP	0.989657	0.614397	0.846745	0.957	0.931414	0.16	0.946255	0.711419	0.978892	1.58944	0.94591	0.293343	1.17333	9.28009e-05
		CREBL2	0.944092	2.43e-17	1.27633	0.757	2.53209	0.059	1.18269	1.09254	1.06366	0.999144	1.0747	0.573048	0.836548	0.0789282
		CREBRF	1.97657	0.000843654	2.89989	0.0145	2.28099	9.1e-06	1.656	1.45833	1.93319	2.34845	0.734616	0.00926072	1.67479	4.44123e-07
		CREBZF	1.09505	0.0477555	0.828745	0.531	0.802252	0.1	0.980065	1.0352	0.687739	0.930556	1.09729	0.0717155	0.695883	2.34288e-17
		CREG1	1.07998	0.642385	1.72071	0.707	0.917035	3.3e-05	0.946731	1.84132	1.66495	0.61064	1.07498	0.30477	1.08179	0.237135
		CRELD1	1.36604	0.845249	1.56917	0.385	1.08631	0.14	0.972337	1.58834	2.19254	0.666265	1.0982	0.778971	1.26358	0.372796
		CRELD2	0.955283	0.807968	1.35097	0.834	0.952412	0.032	0.82915	2.10528	4.30279	2.18298	1.01341	0.906318	1.15068	0.0470423
		CREM	1.70527	0.600395	0.627636	7.28e-05	0.911554	0.00044	0.962951	0.49245	1.02264	1.99853	0.822826	0.286165	1.07043	0.752173
		CRIM1	1.6144	0.008191	3.15798	8.61e-07	1.30072	2.8e-39	1.20347	5.50518	1.72731	2.66786	1.35027	5.60303e-05	0.826377	0.0205654
		CRIPT	1.35097	0.0825759	1.25701	0.047	1.28273	0.12	0.991057	0.809318	0.794108	0.672366	0.888907	0.374447	0.729193	0.00288646
		CRISPLD1	1.19748	0.714936	1.55186	0.57	1.123	0.067	0.881601	0.572328	1.17195	1.29361	1.16241	0.268158	0.806668	0.0850941
		CRK	1.12896	0.547171	1.16959	0.32	1.07803	0.14	1.00308	1.26273	0.600298	0.826051	0.953042	0.39722	0.818135	1.85932e-06
		CRKL	0.667112	0.0905704	0.667574	5.15e-05	0.836496	1.9e-05	0.931645	0.814777	0.593864	0.522436	0.852964	4.12215e-06	0.883981	0.000470281
		CRLF1	1.65405	0.941771	1.05702	7.64e-06	1.01412	0.73	0.659508	0.57702	0.774538	0.906936	1.70465	0.0678867	1.89345	0.0192015
		CRLF3	0.835667	0.660322	0.643495	0.414	0.90572	0.011	1.10239	0.931721	0.394628	0.555364	1.01406	0.930091	0.831337	0.0649245
		CRLS1	0.880259	0.377284	0.825305	0.679	0.79949	0.47	0.911624	1.06035	1.64788	0.858184	1.02754	0.899984	1.10798	0.551743
		CRMP1	0.98214	0.00136582	1.39088	0.918	1.37714	0.00096	1.22504	1.086	0.689814	0.706286	1.52996	0.00298497	1.04429	0.848702
		CRNDE	1.21841	0.711351	1.06585	0.228	1.07204	0.74	1.21399	0.64512	0.481773	0.535545	1.24264	0.000441107	0.710748	1.59098e-08
		CRNKL1	1.15189	0.0166029	0.948684	0.309	1.30862	0.74	1.14037	0.814806	0.567608	0.617328	0.950312	0.589479	1.08897	0.281365
		CROCC	0.45376	5.47e-05	0.849685	6.53e-08	0.565014	0.35	0.707164	1.25419	0.755107	1.22164	1.02299	0.868799	1.23025	0.0154588
		CROCCP2	1.02669	0.994166	0.951318	0.881	0.998489	0.75	0.966945	0.831828	0.819551	0.653543	0.924283	0.171332	0.986112	0.856081
		CROCCP3	0.692555	0.2682	1.09505	0.264	1.38289	0.81	0.923833	1.21839	0.641934	0.815278	1.01311	0.967091	0.888935	0.631588
		CROT	0.90125	0.506163	1.17283	0.801	1.24356	0.65	0.982964	1.10605	1.41359	2.03533	1.0878	0.630269	0.809286	0.126375
		CRTAP	0.908778	0.256792	1.02598	0.47	0.878789	0.86	0.903747	1.3288	1.48181	2.10107	0.98061	0.777942	0.732747	3.1945e-14
		CRTC1	0.900002	0.65909	1.25527	0.582	1.08437	0.13	0.852753	0.879011	1.15881	1.98202	1.07159	0.409248	1.57493	3.16468e-15
		CRTC2	1.06437	0.950835	1.23971	0.722	1.01253	0.091	0.871233	1.08798	1.39485	2.12187	0.924554	0.230793	1.15468	0.00835316
		CRTC3	1.30858	0.0713403	1.08298	0.0387	0.798532	0.6	0.891627	1.1742	0.998278	2.33713	1.0031	0.979506	0.977232	0.816418
		CRY1	1.81378	0.134642	1.07252	1.29e-07	0.826047	0.66	1.15385	1.01095	0.922669	3.30106	0.848147	0.0197227	0.763291	2.94072e-05
		CRY2	1.232	0.0222213	1.18756	0.112	1.30231	0.17	0.871335	1.08116	1.10689	1.4752	0.9381	0.652364	0.837063	0.101467
		CRYBB2P1	0.953299	0.239012	0.942131	0.86	0.797831	0.81	0.869239	0.872341	0.52496	0.498878	0.826277	0.00787389	0.992682	0.950035
		CRYBG1	1.34723	1.36e-09	1.27103	0.1	2.38237	0.17	1.92039	1.85286	1.17535	0.915632	1.31579	0.414523	1.20574	0.59703
		CRYBG3	0.720465	0.232852	0.773782	0.2	1.32866	0.3	1.01271	2.55998	1.8901	3.58673	1.14801	0.212326	0.769284	0.00631845
		CRYL1	0.80107	0.31196	1.752	0.326	0.810284	0.00094	1.07449	1.53847	2.11453	1.04686	1.18002	0.59502	1.06401	0.859903
		CRYZ	0.666649	0.0190254	0.709562	0.000516	0.764007	0.0021	0.972351	0.83866	0.560709	0.508885	1.15889	0.178406	0.957825	0.757446
		CRYZL1	1.07773	0.671812	0.960595	0.688	0.929315	0.83	1.03603	0.686929	0.57691	0.673862	0.97202	0.834712	1.09182	0.399536
		CS	0.821311	0.000115981	0.651122	0.0647	0.706053	1.3e-06	1.03469	0.882737	0.705173	0.833439	0.964243	0.400152	0.912714	0.00680385
		CSAD	0.709562	0.0873066	1.23799	0.0679	1.34133	0.25	1.06953	1.12723	0.985211	0.580548	1.02551	0.896488	0.74695	0.0193484
		CSDE1	0.973329	0.827906	0.706617	0.856	0.97065	8.3e-05	1.00712	0.757055	0.991111	0.805078	0.978042	0.586915	0.859491	1.42473e-08
		CSE1L	0.835667	2.5e-08	0.421908	0.12	0.59785	1e-21	1.02701	0.771905	0.364857	0.291649	0.997448	0.966907	0.801243	1.7106e-12
		CSF1	1.60436	5.32e-18	3.47979	0.0235	4.18239	1.4e-13	0.880265	8.64452	24.3826	5.21664	0.944881	0.818246	1.41672	0.0262184
		CSGALNACT2	1.03742	0.089666	1.26488	0.846	1.23637	0.057	1.10192	1.86775	1.71581	1.84055	0.758651	0.00309916	0.898039	0.331392
		CSK	0.944092	0.291605	1.05409	0.777	0.8506	0.78	0.871568	1.03786	0.947737	0.85053	0.880777	0.00686209	0.759785	7.00074e-11
		CSKMT	0.698339	0.0989169	0.582367	0.152	0.688164	0.014	0.863464	1.0828	0.933174	0.642757	0.916423	0.798816	1.06889	0.843187
		CSNK1A1	1.18181	0.276348	0.863938	0.222	1.15182	0.26	0.987437	0.941734	0.882992	0.952133	1.04623	0.459561	0.948788	0.354138
		CSNK1D	1.04247	0.614939	1.17691	0.807	0.929486	0.18	0.867034	1.17848	1.26589	1.76844	0.901466	0.0052768	0.792017	3.67013e-12
		CSNK1E	1.40444	0.86971	1.48658	0.0187	0.966708	0.0024	0.930577	1.49907	1.14065	1.02215	0.908109	0.00446988	0.86948	9.60071e-06
		CSNK1G1	1.01115	0.881999	0.917004	0.958	1.02745	0.57	1.12822	0.73384	0.870627	1.04814	0.899045	0.293343	1.83473	1.96087e-17
		CSNK1G2	0.733058	0.0277841	0.719966	0.0142	0.76809	0.0047	0.903064	1.03388	1.18679	1.20507	0.878296	0.00100755	0.835817	1.64461e-06
		CSNK1G3	1.01045	0.966514	0.818469	0.962	0.991248	0.12	1.15241	1.06899	0.944479	0.969376	0.981007	0.868961	0.813087	0.00412396
		CSNK2A1	1.04972	0.0138455	0.738157	0.719	0.795895	0.00069	1.02005	0.815768	0.943261	0.757578	1.03971	0.418561	0.899896	0.00478616
		CSNK2A2	0.922103	1.16e-07	0.734584	0.599	0.576712	0.0054	0.897869	0.858061	0.841911	0.721728	0.920708	0.268253	1.04387	0.603465
		CSNK2B	1.09885	0.000501233	1.13839	0.747	0.506319	0.61	0.85972	1.07755	0.763199	0.886133	0.700913	0.252257	0.818018	0.550489
		CSPG4	0.983502	1.07e-35	3.49914	0.964	8.03809	7.3e-13	1.3378	26.8211	16.8493	3.25518	0.793949	0.422622	1.10642	0.751352
		CSPG5	1.1599	6.2e-29	0.401091	0.432	0.217552	2.4e-11	0.820298	0.0659074	0.243912	0.312621	1.21707	0.0072641	1.00078	0.996035
		CSPP1	1.20664	0.012628	1.04826	0.167	0.746185	0.77	1.15655	0.960255	0.933311	0.894328	1.07427	0.371982	0.979981	0.83846
		CSRNP1	1.78509	0.00554787	1.21504	0.000253	1.53519	0.28	0.982829	1.06329	2.1682	30.3461	0.73945	0.00980992	1.72648	4.67407e-08
		CSRNP2	1.21419	0.000463655	0.987601	0.13	1.4483	0.95	1.01886	1.25147	0.910755	0.968715	1.05014	0.661272	0.928688	0.453272
		CSRNP3	0.745355	0.480696	0.40388	0.456	0.767718	0.0022	0.9734	0.124888	0.450616	0.777697	1.20634	0.419715	1.0108	0.972796
		CSRP2	1.15029	0.0179096	2.2084	0.547	1.50344	5.7e-07	1.01479	1.08917	0.322133	5.66512	0.728896	4.86807e-07	0.874334	0.0572439
		CST3	1.58557	0.000465887	2.50533	0.00169	1.60971	7.8e-13	0.815552	2.29369	1.7982	1.3568	1.16931	0.000934559	1.2058	3.56034e-05
		CSTB	1.22859	0.202455	1.48968	0.669	1.60572	0.3	0.975759	1.90154	1.26373	1.91045	0.857364	0.000289796	0.880675	0.00314198
		CSTF1	0.948684	0.0193585	0.688725	0.759	0.762505	0.00089	1.05372	0.686546	0.715281	0.440486	0.959203	0.687574	0.964214	0.721601
		CSTF2	0.859161	0.0128303	0.684442	0.323	0.735399	0.0018	0.723425	0.688138	0.405583	0.404012	0.893933	0.12021	0.77586	3.53559e-05
		CSTF2T	0.955945	0.733705	0.905634	0.811	0.944131	0.52	0.957114	0.928235	0.556608	0.60607	0.96773	0.730901	1.05022	0.557316
		CSTF3	1.05629	0.000626882	0.82245	0.713	0.713755	0.069	1.11538	0.668688	0.77852	0.440368	0.887487	0.0690669	1.03218	0.710671
		CTBP1	0.935623	0.519225	1.00556	0.65	0.919695	0.97	0.654318	1.0083	1.41973	1.34414	0.993138	0.936474	0.939581	0.294027
		CTBP1-AS	1.16554	0.962793	1.17528	0.73	0.975653	0.69	0.894994	1.10422	1.00884	1.59919	0.958487	0.909593	0.700162	0.164823
		CTBP2	1.00278	0.619905	1.20832	0.988	1.06641	0.067	0.854245	1.68347	1.67689	2.43084	0.943943	0.385443	0.850422	0.0018574
		CTC1	0.720465	0.000124832	0.711039	0.0652	0.558176	0.037	1.06661	0.936021	0.298093	0.428645	1.251	0.00279636	0.70334	1.40982e-06
[truncated: 8,710 more rows]
[truncated: 1 more columns]

## Sheet: Signature EWS-FLI1 targets
			Fold Change in RNA-seq			Increased
						Decreased
			A673						Sankar et al., 2013 (1)		Riggi et al., 2014 (2)		HEK293T/17							A673						Sankar et al., 2013 (1)		Riggi et al., 2014 (2)		HEK293T/17
		Gene	siEWSR1	p-adj	siEF	p-adj	siE-EF	p-adj	shEWSR1	shFLI1	shFLI1 A673	shFLI1 SKNMC	siEWSR1	p-adj	(+) EWS-FLI1	p-adj			Gene	siEWSR1	p-adj	siEF	p-adj	siE-EF	p-adj	shEWSR1	shFLI1	shFLI1 A673	shFLI1 SKNMC	siEWSR1	p-adj	(+) EWS-FLI1	p-adj
		CRYAB	0.942689	0.972666	36.8511	7.6e-05	5.05176	0.115264	0.894598	8.21715	27.5848	2.27059	1.25406	NA	7.36836	0.0207611			C7	0.520242	0.164985	0.126821	4.65e-06	0.124423	1.53e-06	0.622984	0.0943781	0.0665451	0.166558	#N/A	#N/A	#N/A	#N/A
		PTX3	3.36248	0.00164841	21.2806	4.56e-20	4.25562	3.85e-05	1.91527	21.0969	15.8444	318.715	1.01977	0.966907	2.3303	0.000571837			CDH12	0.555393	4.11e-06	0.162835	1.08e-50	0.219502	8.95e-38	0.972205	0.0520157	0.0785055	0.104025	1.18961	NA	0.93274	0.923894
		POSTN	1.25275	0.835963	20.6453	2.02e-06	5.35147	0.0145571	1.05842	9.53747	9.23442	0.387522	0.515121	NA	3.25467	0.762104			PPP1R1A	0.559724	2.97e-05	0.179418	5.76e-41	0.0990282	1.88e-70	0.833426	0.0520741	0.0528401	0.0518756	1.00535	0.990801	1.14912	0.709564
		IGFBP7	1.04406	0.943391	17.919	4.06e-25	4.52458	3.94e-07	#N/A	15.8253	40.9461	86.9501	1.70044	NA	1.39793	0.521404			SLC15A2	0.910494	0.618964	0.232624	1.85e-29	0.148972	2.11e-47	0.904563	0.0671535	0.207038	0.275396	1.33467	0.48569	0.892641	0.817502
		DKK1	2.60636	0.0108983	17.3908	1.12e-19	10.4722	1.42e-13	2.02086	11.5889	15.9867	100.368	1.89672	NA	3.83236	0.00293316			DAB1	1.11837	0.418892	0.30151	1.81e-34	0.28296	1.18e-38	0.958443	0.0733711	0.226027	0.153681	2.03544	NA	2.1914	0.074166
		DENND2A	1.23127	0.674534	16.6263	8.44e-27	7.26546	2.18e-13	0.440534	8.79833	20.9142	12.265	0.789039	0.475651	1.78539	0.0180532			GSTM4	0.417433	1.1e-20	0.203153	8.97e-69	0.17422	9.86e-83	0.853855	0.114825	0.138939	0.226486	0.980201	0.95551	0.979049	0.950986
		MGP	1.12225	0.892461	16.5809	3.1e-09	14.8661	1.23e-08	1.58891	18.8184	153.338	49.3175	1.25113	NA	7.15233	NA			SSX3	#N/A	#N/A	#N/A	#N/A	#N/A	#N/A	#N/A	#N/A	#N/A	#N/A	#N/A	#N/A	#N/A	#N/A
		LOX	1.5545	0.00156582	16.1623	9.98e-125	8.3529	5.63e-73	1.59503	22.309	37.737	22.0865	1.00926	0.968848	0.745122	0.0363201			NPY1R	1.54045	0.00120053	0.256686	2.6e-30	0.152664	5.69e-56	1.04175	0.0659759	0.0927549	0.092332	1.11754	0.753154	1.56786	0.0645969
		PPIC	1.54213	0.499066	15.8599	9.55e-13	4.41375	0.000429336	0.330804	13.8889	14.2587	20.5386	1.62242	8.64498e-05	0.736263	0.0296073			CNTNAP2	1.21854	0.133571	0.263273	5.02e-36	0.147397	1.35e-69	1.14234	0.0576509	0.217482	0.275394	1.39873	0.000489054	0.784322	0.0202036
		ADM	2.5569	3.66e-09	14.0579	6.64e-76	3.48942	4.25e-17	0.986335	8.67183	3.74871	85.1709	1.33053	0.0695305	1.31018	0.0815907			NR0B1	0.72035	0.0166155	0.277458	1.29e-28	0.151095	1.55e-59	0.693888	0.0855076	0.140433	0.0440997	#N/A	#N/A	#N/A	#N/A
		CREB3L1	1.14404	0.504614	12.062	9.14e-90	3.13187	9.48e-19	0.762266	17.1222	9.38901	7.12018	0.677233	0.19651	0.953077	0.907067			HOOK1	1.08783	0.549115	0.301728	1.34e-38	0.179415	3.6e-78	1.19747	0.0661977	0.338684	0.220913	1.46861	1.69754e-14	0.854287	0.00570282
		DYSF	1.10561	0.914543	11.0801	6.61e-08	6.0334	0.000103716	0.654072	9.88429	8.48451	0.634797	1.8038	0.119498	2.22457	0.0182246			FLI1	0.909687	0.546236	0.3218	1.6e-26	0.259607	2.61e-37	1.06311	0.185194	0.212862	0.442111	0.875345	0.149405	18.5598	0
		RCAN1	2.2734	0.0304248	11.0356	1.42e-14	6.51602	3.17e-09	0.841754	11.6853	4.32198	10.2689	0.876433	0.0956689	0.975575	0.819542			PEG3	0.715617	0.0402794	0.224291	2.09e-29	0.355923	1.13e-14	0.908381	0.0727307	0.190769	1.09798	#N/A	#N/A	#N/A	#N/A
		LOXL2	1.82518	3.54e-05	10.9713	3e-80	8.97225	2.03e-67	1.13093	22.5047	49.9297	42.813	1.319	0.0505814	1.51713	0.00107912			GLI1	0.982469	0.958163	0.37975	3.84e-07	0.360326	4.86e-08	0.880693	0.0676825	1.01074	2.14373	1.54384	0.0556434	1.89801	0.00166499
		ADAM12	1.57336	0.366197	10.5734	1.68e-13	10.5573	1.24e-13	0.720802	7.76135	7.96046	0.180843	1.35154	NA	1.08452	0.920359			WWOX	1.12687	0.462411	0.455766	2.02e-11	0.417413	3.83e-14	1.08889	0.223037	0.444407	0.311822	1.25669	0.051476	1.15627	0.253764
		PRSS23	1.81293	1.64e-06	10.4917	3.98e-101	5.79831	1.1e-56	1.17276	18.6207	6.46373	12.5985	1.05706	0.679177	0.818622	0.0439815			TPSAB1	0.803575	0.407401	0.456156	0.000105788	0.365136	3.47e-07	0.659697	0.059786	0.207634	0.145321	2.44557	NA	16.9124	0.0660699
		F2RL1	1.83551	0.0119733	10.1666	6.28e-34	5.47913	2.28e-18	1.04525	14.9306	7.06377	8.30452	1.1983	0.128424	0.740961	0.00604762			NKX2-2	0.649398	0.00655467	0.471162	1.18e-07	0.423752	7.59e-10	0.886181	0.137848	0.110213	0.261561	1.37766	0.375421	0.779222	0.519115
		IGFBP5	1.10766	0.854455	9.44125	2.14e-12	18.7106	1.25e-20	1.11764	19.1368	20.0609	6.03917	1.045	0.834759	0.658055	0.0020351			RET	1.94331	1.45e-07	0.558999	3.33e-06	0.310154	3.99e-22	0.939241	0.0777743	0.550221	2.71265	1.91049	0.000343127	1.80016	0.00119672
		SERPINE1	2.86793	2.94e-16	9.29322	5.96e-76	4.00803	1.2e-29	1.28386	26.9907	8.82744	120.456	0.759512	NA	8.74583	5.97436e-06			EWSR1	0.422806	1.05e-17	0.646378	1.89e-05	0.250032	3.96e-47	0.408789	0.720765	0.772793	0.934712	0.85543	0.404943	14.9448	6.91184e-106
		COL6A3	1.28504	0.0882673	8.79747	4.38e-92	8.70646	2.75e-91	0.999432	18.1753	36.1955	29.9401	1.38671	NA	3.81276	0.0107384			SH2D1A	1.65535	NA	0.613432	0.723748	0.689285	0.790549	0.987763	0.48395	1.52499	0.100469	#N/A	#N/A	#N/A	#N/A
		SOCS1	1.7708	0.0178665	8.53498	1.1e-30	5.79626	1.03e-20	0.940027	6.6144	8.69699	29.8715	0.994282	NA	1.49149	0.512835			GYG2	0.686189	0.0115425	0.836355	0.255881	0.39019	2.77e-13	0.843698	0.0795274	0.31664	0.203823	0.825756	0.0979884	0.776915	0.0185521
		PHLDA1	2.83483	1.55e-25	8.38199	1.49e-111	10.3751	5.48e-135	1.4511	17.7877	24.5703	140.372	0.877884	0.777693	0.783907	0.539617			FCGRT	0.688205	0.000503122	0.766869	0.0117643	0.427604	3.3e-19	0.797523	0.0640424	0.185742	0.069823	0.705499	0.00585816	2.58671	1.1998e-20
		SPP1	1.06216	0.796737	8.35414	1.12e-67	12.0037	1.24e-93	1.1097	9.91672	45.0635	0.904217	0.714117	NA	5.14138	0.0442531			NEB	2.35051	4.55e-08	0.910244	0.675686	0.304614	1.52e-13	1.3103	0.162132	0.0596736	0.85092	0.83679	0.382489	3.28106	2.17573e-19
		TGFBI	1.67455	6.91e-06	8.24213	1.01e-95	6.58511	1.88e-76	0.939696	7.1261	5.61144	51.7099	1.39787	NA	4.31909	0.137362			EPHB3	1.4758	0.0100165	0.993864	0.979113	1.4813	0.00473557	0.715407	0.206151	0.486137	0.28039	0.912154	0.805853	2.40244	3.68138e-05
		TM4SF1	2.50094	0.00972467	7.98547	6.4e-13	11.3211	9.95e-18	0.894223	23.4889	49.4098	2.58348	2.15241	NA	2.49289	0.726337			CRLF1	1.6545	7.64e-06	1.05725	0.725253	1.01412	0.941771	0.659508	0.57702	0.774538	0.906936	1.70465	0.0678867	1.89345	0.0192015
		PDGFA	2.71723	0.0129801	7.81113	1.79e-09	9.3197	4.21e-11	0.769421	23.1211	15.0796	40.2377	1.4479	0.0628978	0.831359	0.437464			GAS1	1.05695	0.79086	1.18079	0.288951	0.816626	0.17782	0.659565	0.431387	0.407353	0.987696	0.644933	3.50282e-13	0.548126	6.3617e-23
		THBS2	2.31232	0.155952	7.62245	4.56e-06	10.6279	3.85e-08	0.977561	17.9571	9.22621	0.331546	0.221347	NA	2.254	0.561586			ELN	1.16214	0.784106	1.39514	0.4477	0.599403	0.200184	0.847594	2.55861	0.255705	0.448099	1.17086	NA	12.2251	0.0157707
		NT5E	1.67726	1.33e-07	7.57291	1.01e-116	5.84824	9.06e-89	1.06375	18.759	26.5119	45.4837	1.2514	NA	3.34529	0.00732455
		AHNAK2	1.4567	0.0370965	7.53266	2.86e-47	7.42871	8.05e-47	1.01253	16.9724	10.4935	3.90241	1.27453	0.216413	1.87468	4.5957e-05
		COL3A1	1.49538	0.00332588	7.51442	4.03e-69	4.8119	3.66e-42	0.811416	7.90324	8.91555	22.6175	0.70189	NA	1.02481	0.970601
		DKK3	1.47437	0.0300881	7.48292	1.32e-48	14.1369	5.77e-85	0.758656	24.8762	20.9072	1.49227	1.23045	0.618273	1.52158	0.20707
		EPAS1	2.94104	0.000530566	7.37917	7.58e-14	2.25243	0.00783648	1.86545	4.58514	8.07681	36.2524	1.22113	0.0147621	0.678051	4.98809e-07
		BST1	2.02293	4.19e-06	7.35792	3.76e-52	4.06721	1.27e-25	1.09472	11.0675	3.57028	2.09398	1.19752	NA	1.87735	0.304565
		CYP1B1	1.21788	0.413926	7.08448	3.59e-36	8.55313	7.31e-44	0.889078	3.67921	11.7119	1.98496	0.741592	0.109867	0.888476	0.592049
		TGFB1I1	0.973434	0.922282	6.89641	7.45e-46	4.30283	2.92e-26	0.783862	18.146	3.01008	17.1801	1.04217	0.899051	1.05382	0.866989
		CD44	1.64686	4e-06	6.86295	1.64e-90	9.6353	4.56e-125	1.29184	26.3659	16.081	#VALUE!	0.330443	NA	2.56945	0.0397477
		BMP1	1.02283	0.913824	6.37417	4.16e-69	4.30236	6.27e-43	0.773174	11.5905	9.13172	6.67282	0.928849	0.667868	1.07603	0.654499
		PLAU	1.61593	0.000829838	6.34565	3.65e-52	5.93426	1.25e-48	1.22057	14.6519	30.6115	51.7664	1.41288	NA	2.12945	0.289889
		EHD3	1.2188	0.169003	6.31723	5.49e-72	5.10717	1.93e-56	0.766531	17.971	5.12301	3.54264	0.948546	0.768737	0.731764	0.00993436
		COL6A2	1.47528	0.00738592	6.10039	1.07e-51	10.079	2.4e-84	0.7496	24.4021	10.3271	4.47619	1.06794	0.492444	1.18951	0.0178546
		RNASET2	1.23982	0.478732	6.02427	2.59e-21	4.23615	6.04e-14	0.889344	8.06013	5.38831	0.684272	1.10498	0.527278	0.821513	0.133008
		MXD4	1.62648	0.000353744	5.82281	1.98e-53	4.05625	7.06e-34	1.00544	3.79705	5.63799	5.39966	1.09729	0.131353	0.890401	0.041264
		MICAL2	2.02901	0.00224587	5.81403	5.35e-20	3.89793	3.69e-12	1.40442	16.2217	4.67129	0.554586	1.20857	0.353682	1.14134	0.534942
		ASS1	1.40767	0.0158645	5.78072	8.49e-54	9.58097	1.83e-89	0.972385	9.39525	11.3694	0.517726	1.28476	3.16901e-05	1.26696	8.51069e-05
		PMP22	1.03464	0.894228	5.75789	3.71e-44	17.9291	2.81e-124	0.239093	24.606	72.1932	6.55557	0.908433	0.570237	1.60804	2.27824e-05
		ITGA4	0.855044	0.570276	5.75276	3.34e-26	4.2325	5.33e-18	0.86003	12.0672	10.7512	7.19683	1.24759	0.216413	0.951856	0.835332
		COL1A2	1.42313	0.00111261	5.60532	1.52e-78	3.57573	4.05e-43	0.849356	5.37743	8.79499	10.4522	1.60979	NA	4.61551	0.228499
		PCSK1	1.19829	0.741487	5.50664	6.18e-07	16.9705	8.75e-18	2.20089	6.12509	6.22821	#VALUE!	1.86894	NA	2.66038	0.691458
		LRRC17	1.07402	0.68416	5.35457	1.36e-60	2.8179	3.51e-23	1.09139	6.39432	3.97019	2.72112	1.35834	NA	2.0424	0.0660391
		NID1	1.40321	0.0250257	5.30499	1.2e-46	9.49478	3.17e-86	0.714492	13.634	11.4111	10.2354	1.23713	1.5901e-10	0.831948	8.29886e-08
		NDRG1	3.34633	0.00012268	5.06049	1.85e-08	7.98234	1.99e-13	1.10099	4.54909	2.74054	1.42168	0.785025	2.39007e-05	0.921935	0.23591
		FAM114A1	1.41253	0.0188109	5.01306	1.98e-44	3.55561	1.33e-27	0.97527	15.7935	8.70238	#VALUE!	1.3503	0.189816	0.915272	0.765432
		FBN1	0.979353	0.903966	4.983	1.21e-67	3.57333	1.03e-42	1.08721	12.9718	5.95847	28.7847	1.34189	0.0013654	1.592	3.895e-08
		ADGRG1	1.28009	0.268345	4.93935	2.75e-25	10.8889	1.49e-57	1.01628	20.7472	19.3369	4.4608	1.77916	NA	8.13906	0.0037199
		COL9A3	0.89933	0.579079	4.92267	1.14e-41	5.28464	1.01e-45	0.859775	2.70205	1.7112	2.86695	0.84082	0.636099	1.73368	0.0317952
		COL6A1	1.24879	0.132109	4.84199	8.87e-46	7.47577	1.64e-74	0.695558	14.5921	10.0991	5.65479	1.1382	0.00773044	0.932606	0.200516
		MANBA	1.99967	7.74e-09	4.79066	3.32e-47	1.8961	2.87e-08	0.904785	3.90752	6.69719	3.97855	1.27471	0.0340745	1.4356	0.000469981
		P4HA2	1.30396	0.141051	4.72403	9.25e-32	4.7318	4.21e-32	0.9522	10.115	10.869	16.9859	1.11864	0.371591	1.17363	0.146429
		IER3	3.71229	8.78e-16	4.56398	3.18e-22	4.93699	1.24e-24	1.0217	6.77082	5.53874	14.8346	0.63294	0.114445	1.38686	0.249575
		TNXB	0.895995	0.615613	4.39604	6.09e-31	5.11306	4.31e-38	0.971644	6.44237	4.62278	1.72963	1.10364	0.679661	11.1566	4.62869e-83
		RND3	3.09447	1.37e-15	4.36071	1.04e-27	5.23197	4.11e-35	1.49032	4.36707	3.07571	20.0249	0.839637	0.0556434	1.18161	0.0572439
		EMP1	0.774439	0.0367684	4.35975	6.08e-53	4.14393	1.61e-49	1.21859	3.42359	4.99329	78.6441	0.375265	NA	1.37825	0.555632
		EHD2	1.42267	0.00206414	4.33121	1.13e-53	4.55028	1.14e-57	0.981066	9.38114	5.04205	43.0872	1.26708	0.239368	0.848807	0.450505
		SPHK1	1.46718	0.125534	4.28869	2.05e-14	4.46239	2.57e-15	1.2021	12.6303	4.07478	6.39278	1.28854	0.0549594	1.14623	0.36264
		HLA-B	1.596	0.00295834	4.1442	9.39e-27	2.87831	4.34e-15	0.872181	5.9636	4.3225	1.19799	1.15238	0.00559952	1.46125	1.66999e-17
		NRP1	1.80235	6.85e-08	4.1274	8.38e-47	6.64853	5.64e-84	0.974921	3.19941	6.51593	4.26598	1.06135	0.669963	0.643472	2.69967e-06
		CD9	1.25549	0.405727	3.98275	1.28e-13	3.51358	1.87e-11	0.865039	12.3147	4.9882	2.56292	0.896039	0.349278	0.895373	0.329605
		CXCL8	3.7235	4.53e-16	3.89483	3.56e-18	5.3184	1.73e-27	1.859	19.1978	3.51046	0.990333	0.48992	0.0447398	5.04598	1.9125e-10
		COL16A1	0.841475	0.219979	3.85277	1.68e-40	1.4898	0.000316098	0.595347	1.82089	5.07427	4.41996	0.847171	NA	4.60543	0.00387024
		S100A4	1.29742	0.19343	3.81202	4.23e-19	3.87545	1.19e-19	0.985796	4.68378	1.8797	5.34922	1.43135	NA	1.94945	0.27518
		SFN	0.890105	NA	3.77765	0.0507877	8.0697	0.000691135	1.19948	2.40618	2.85936	8.13795	1.51263	NA	4.17622	7.3595e-05
		S100A10	1.82817	6.98e-09	3.77234	6.26e-44	5.89384	1.73e-78	1.254	8.49138	2.40585	7.98208	1.16602	0.0523381	0.998669	0.992814
		S100A6	1.30092	0.0569008	3.76991	5.52e-34	3.83786	4.96e-35	1.01613	5.7459	4.40449	#VALUE!	1.28721	NA	2.79749	0.333186
		HBEGF	1.94106	0.0862493	3.69783	5.19e-05	1.82814	0.0959176	1.12003	8.98288	2.8843	144.658	0.869824	0.539448	2.6732	4.79809e-12
		ENC1	0.949574	0.801509	3.55701	2.42e-28	5.7838	1.53e-54	1.01266	4.38475	6.05047	41.3046	1.00726	0.977207	1.39971	0.013794
		LGALS3	1.55904	0.000141594	3.53246	1.34e-35	5.43153	1.91e-64	1.26544	4.43009	4.10074	0.611676	1.32354	0.292646	1.20014	0.523477
		CD59	1.30589	0.101027	3.51039	4.28e-23	3.19424	6.93e-20	1.02944	7.17144	3.64294	3.27942	0.981099	0.889003	0.842582	0.0539081
		FOSL2	2.49928	1.56e-15	3.49194	3.23e-30	3.06398	1.97e-24	1.33038	5.7176	3.80906	54.05	0.890384	0.457944	1.14213	0.352254
		CTSL	1.06445	0.786835	3.48962	7.43e-21	2.4253	7.39e-11	0.889525	6.28226	3.27005	2.4178	1.0075	0.9461	0.889838	0.0910962
		MYOF	1.29776	0.026005	3.43697	4.42e-39	2.65322	1.17e-24	1.22987	14.0924	6.35489	34.4894	0.780416	0.601272	1.02787	0.961717
		SPRY2	1.35998	0.0306467	3.37673	9.06e-27	7.35767	2.68e-72	0.890231	5.41718	6.45804	4.94268	0.590655	1.54001e-11	1.12072	0.23238
		PDLIM4	0.773057	0.211839	3.37605	1.22e-16	7.64484	1.32e-46	0.784897	4.74275	2.70686	2.80174	1.03079	0.930242	1.28761	0.280617
		CDC42EP3	1.44027	0.00384095	3.31496	8.91e-30	3.2991	9.87e-30	1.14754	12.3752	3.59463	14.8362	1.12738	0.424925	0.82834	0.158005
		IL11	1.70808	0.0993474	3.28831	3.34e-06	17.6276	2.22e-35	1.11267	17.6354	10.065	634.308	1.28532	NA	5.21791	0.000695428
		GEM	2.77092	4.43e-13	3.27877	9.26e-19	11.0847	1.13e-77	0.922777	3.10026	3.79968	20.1751	0.477194	8.46072e-08	1.79256	4.08233e-06
		ANXA4	1.09772	0.670938	3.24624	8.76e-19	1.437	0.0166151	1.05507	5.45897	2.5954	1.93672	0.979068	0.923729	1.22409	0.155434
		COL4A2	1.16202	0.289023	3.12711	5.63e-29	2.24851	5.3e-15	0.975828	4.6054	1.79824	2.28729	1.35681	6.13485e-07	0.815616	0.00175471
		ITGA6	1.54258	0.00139255	3.10345	1.37e-22	5.91711	7.74e-56	1.01678	6.83397	4.96292	1.13271	1.35313	0.00102011	0.766617	0.00576171
		HSPB3	1.44471	NA	3.07049	0.0840455	3.09856	0.0769524	1.33937	9.91834	2.85936	2.26054	0.543331	NA	3.26998	0.359416
		SP100	0.849841	0.553606	2.97444	3.26e-10	1.65004	0.00881409	1.58745	7.9892	3.18376	9.09868	1.85196	NA	4.94093	0.161921
		JUN	2.13196	3.24e-09	2.90875	6.24e-19	1.69505	3.08e-05	1.21743	2.9436	1.38707	2.99009	0.614768	5.04678e-85	1.33323	6.81556e-31
		UPP1	2.35177	2.01e-09	2.79161	3.08e-14	3.50239	4.11e-21	1.20566	8.1511	4.29344	16.9102	0.74406	0.00934613	0.961792	0.81626
		PGF	0.993384	0.978753	2.70029	2.11e-15	3.28407	6.81e-22	0.752107	4.25113	2.59141	8.17521	0.940765	0.83178	2.60189	6.46414e-10
		STK32B	1.2021	0.141155	2.585	1.12e-23	4.29556	6.81e-56	1.09952	4.4271	0.901891	1.23908	0.133169	NA	1.27946	0.907761
		COL5A2	1.38304	0.00130401	2.58202	8.19e-28	2.07477	8.84e-17	1.04912	4.67676	2.95637	5.68351	1.46222	0.111397	1.99906	0.000625948
		SEMA3A	1.17549	0.312755	2.5031	1.2e-15	3.57604	5.85e-30	1.01026	8.67673	5.21262	31.913	0.9822	0.962897	0.905744	0.759044
		cdr2l	0.768836	0.213833	2.48089	5.03e-09	2.28677	1.09e-07	0.818852	2.93213	3.74747	1.5517	0.886926	0.0627895	1.2822	5.26713e-06
		BHLHE40	2.11892	1.03e-06	2.47037	3.29e-10	2.206	4.64e-08	1.46508	3.26001	7.59906	59.9677	0.786816	0.00523591	0.807348	0.0131644
		SAT1	1.25455	0.166755	2.45745	6.29e-13	1.79054	6.67e-06	0.980315	5.02922	1.51826	7.41383	0.638386	9.65929e-08	0.85139	0.0961266
		SEC14L2	1.0206	0.936149	2.42107	2.5e-11	3.57184	2.35e-23	0.815371	6.98408	4.77133	3.08498	0.8366	0.401875	1.65179	0.00134053
		FHL2	0.993416	0.985754	2.36623	8.9e-06	1.40357	0.130588	0.777227	11.3168	0.458724	3.59549	0.821853	0.148557	1.21831	0.119442
		S100A11	1.00249	0.989284	2.34605	3.63e-18	2.76711	9.88e-26	1.28363	4.85117	2.725	2.88629	0.960851	0.759348	1.31449	0.000841575
		NPAS2	1.58308	0.00036074	2.29795	2.71e-13	2.45542	1.4e-15	1.29594	8.27332	2.97508	2.09562	0.889364	0.621276	0.786326	0.219734
		GPC1	1.58002	0.00158924	2.29033	7.86e-11	2.79821	2.07e-16	0.853172	7.45534	3.87299	3.35092	1.42053	4.77383e-07	0.842146	0.0335836
		COTL1	0.904564	0.530885	2.28598	4.84e-15	2.65569	7.29e-21	0.969217	8.83828	3.30846	1.75716	1.13772	0.0185208	1.0891	0.140686
		ATXN1	0.948309	0.756341	2.23429	1.3e-15	2.64764	6.99e-23	1.03901	3.78365	2.32244	11.6823	0.813446	0.00965798	0.811918	0.00797361
		RAI14	1.41426	0.0137324	2.23296	1.29e-11	1.41471	0.00750231	1.02001	6.3737	6.05268	10.0408	1.02314	0.806336	0.775249	7.03639e-06
		KLF6	1.59423	1.16e-05	2.17704	1.15e-15	2.19064	5.61e-16	1.15228	3.34779	1.67246	4.2	0.791452	0.00089682	0.882399	0.105902
		NTSR1	1.65249	0.000426364	2.15346	2.29e-09	1.90618	6.64e-07	0.963681	2.03726	1.39149	0.267916	0.899624	NA	3.59714	0.0125246
		BLVRA	0.89276	0.508314	2.12343	4.37e-11	1.68915	8.22e-06	1.02937	2.04645	1.37296	0.879864	0.970922	0.828069	0.841475	0.0592624
		FNDC3B	1.28405	0.0317607	2.12104	2.71e-15	2.53924	2.67e-23	0.77364	3.91418	5.12526	6.24049	0.872785	0.218927	1.10379	0.381364
		NBL1	1.41092	0.0271507	2.10655	1.07e-08	5.03054	2.47e-39	0.870275	3.44898	1.87457	1.32807	1.07461	0.695702	0.869923	0.371273
		PHLDA2	1.52182	0.0165524	2.06284	1.69e-06	2.93333	1.7e-13	0.727551	9.46793	1.99479	15.1751	1.05677	0.860114	2.44688	1.37642e-07
		ARMCX1	1.49627	0.00132779	2.02839	1.52e-10	2.02779	1.15e-10	0.855237	3.14129	2.74753	1.20562	1.09509	NA	8.21863	0.0137476
		RIPOR1	0.993891	0.976792	2.02423	3.99e-11	2.23052	2.39e-14	0.978854	3.90821	1.39444	1.17408	1.0163	0.914928	1.19361	0.0638008
		LZTS1	1.41036	0.0203258	2.01091	2.6e-08	2.29765	1.4e-11	1.05424	1.70516	1.17012	0.836647	0.76423	0.548514	1.38619	0.404714
		ACTN1	1.15631	0.294675	1.99672	1.32e-11	1.17851	0.184561	0.957235	4.11394	1.36655	2.72411	0.932938	0.255322	0.802297	4.41762e-06
		GLRX	0.930312	0.69236	1.98056	1.56e-09	1.19576	0.193107	1.40563	2.21321	2.16673	0.992908	0.890101	0.557179	0.730771	0.0431426
		IGFBP3	1.34402	0.0815029	1.96772	1.18e-06	19.9704	6.79e-120	1.07795	19.6831	15.476	0.114124	0.552124	NA	1.76808	0.561835
		EPS8	1.79671	5.83e-08	1.95473	5.64e-11	2.49517	4.01e-20	1.07556	4.81589	1.44244	2.12708	1.0767	0.590102	0.935527	0.618656
		TMEM158	1.03216	0.972666	1.92108	0.26678	1.99957	0.23165	0.997566	3.91661	2.16151	8.87777	1.0696	0.745841	0.702613	0.0142131
		HLA-A	1.18819	0.346852	1.91839	1.57e-06	0.931723	0.726727	0.936925	1.93924	1.45213	0.643214	0.947419	0.488699	1.19765	0.00147781
		ADORA2B	1.16735	0.467468	1.9147	1.41e-05	1.5773	0.00347021	1.08395	4.06525	2.07018	1.84192	0.900175	0.480408	0.669956	0.00036126
		IL4R	1.1357	0.787847	1.89471	0.0450944	1.34496	0.430243	0.853727	4.5602	3.05216	2.12757	0.937143	0.722741	0.949452	0.776045
		SPATS2L	1.11498	0.622548	1.86031	2.05e-05	2.36887	6.23e-10	1.28526	5.72012	2.61657	1.58555	1.06384	0.642997	1.06071	0.647436
		BIRC2	1.01961	0.924023	1.80101	1.2e-07	1.8362	3.67e-08	1.3057	5.11586	4.49877	2.00629	0.918931	0.389536	0.817322	0.0108696
		PYGB	1.27727	0.079407	1.74066	1.48e-06	2.38345	5.41e-15	0.947391	2.13694	1.83488	1.42727	1.17103	0.00155166	0.935483	0.261092
		SLC12A8	1.22905	0.356639	1.70905	0.0017432	1.16162	0.497751	1.20263	3.03553	1.57429	2.42711	0.877974	0.711215	1.15416	0.659805
		LYPD1	1.16812	0.621914	1.68034	0.0203022	2.39447	1.83e-05	0.771434	1.90718	0.716285	0.256891	1.44243	0.266117	0.613362	0.129635
		CHST3	0.8336	0.233927	1.63737	2.63e-05	2.32094	3.47e-14	0.857899	2.67372	2.72957	1.55441	1.0229	0.911642	0.877371	0.390311
		FOXD1	1.64925	NA	1.61349	0.42215	2.71373	0.0411072	0.657538	5.60303	3.88873	5.00549	0.692692	5.6475e-07	0.690376	4.75007e-07
		GLIPR1	1.51266	0.0205523	1.59739	0.00384983	1.95464	1.34e-05	1.4703	4.95457	0.563715	17.8996	1.78547	NA	1.93658	0.136699
		LMNA	1.0362	0.84558	1.58978	2.11e-05	2.24494	8.41e-15	1.05637	3.18973	1.58768	2.444	0.884603	0.0255043	1.40017	2.35903e-13
		SLC10A3	1.19796	0.33446	1.54159	0.00290033	1.51073	0.00454765	0.924399	2.69185	1.98765	4.24318	1.45182	3.76517e-05	1.11464	0.350612
		NR3C1	1.35774	0.0366669	1.52138	0.00109335	2.14347	2.13e-10	1.27483	2.26661	2.19959	2.36752	1.39745	6.34264e-06	0.911522	0.33879
		TBC1D19	1.29313	0.145937	1.50985	0.00578575	3.01638	4.46e-17	1.0397	1.66435	1.46546	1.14357	1.07651	0.833463	1.02423	0.947925
		PPP1R26	0.710936	0.0395997	1.49568	0.00540522	1.78441	2.37e-05	0.877952	3.04722	1.48933	0.506825	1.00237	0.984794	0.677186	6.61539e-09
		NOL3	0.611506	0.00244039	1.49397	0.00671398	1.4347	0.0158294	0.892511	2.80636	1.82612	2.80355	1.35108	0.0556434	0.942135	0.79025
		IFI16	1.67809	3.49e-07	1.40206	0.000887696	1.01427	0.935702	1.1792	1.12278	2.20229	0.731403	1.01319	NA	4.50659	0.304691
		SYNJ2	1.37042	0.00709424	1.39853	0.00189291	2.99989	2.24e-29	1.09509	2.34767	2.09183	3.20535	1.2163	0.0163985	1.03559	0.764498
		TFPI2	1.44542	0.0424891	1.34925	0.0878477	9.76517	4.94e-63	0.774741	14.1393	1.09157	4.39191	0.976411	0.95971	1.23276	0.540864
		NEFL	0.659806	5.17e-05	1.33648	0.00388405	3.01929	1.02e-34	1.27454	3.10176	2.01763	1.80843	1.30527	1.4753e-05	0.921068	0.289986
		CAST	1.24377	0.0525568	1.26314	0.0226539	1.91503	9.87e-13	0.872371	2.8077	0.929098	1.31698	1.26787	3.50284e-05	0.782051	2.44979e-05
		SIL1	0.77083	0.154924	1.23391	0.222138	1.10883	0.606134	0.872725	2.20999	1.99387	1.17886	0.705082	0.0219071	0.799732	0.167513
		MPPE1	0.694134	0.235676	0.918762	0.817161	1.19234	0.578609	1.05106	1.34643	0.790851	0.822015	1.10565	0.677234	0.756424	0.136422
		STK39	0.742374	0.0273907	0.832613	0.177205	0.938652	0.706068	1.3074	2.81185	0.838153	1.92617	0.975743	0.846372	0.826624	0.0204805
		KRR1	1.06402	0.71951	0.775786	0.038239	1.04835	0.780254	1.19731	0.497623	0.938697	1.15643	0.93424	0.345903	0.843206	0.00321826

## Sheet: A673 ComBat norm cts
	siSCR_1	siEF_1	siE-EF_1	siEWSR1_1	siSCR_2	siEF_2	siE-EF_2	siEWSR1_2
ENSG00000227232.5	85.8183	103.649	63.53	70.2165	66.9764	83.1994	60.4871	61.5687
ENSG00000278267.1	3.73932	3.73932	5.295	3.73932	4.16431	4.16431	2.42327	2.42327
ENSG00000241860.7	3.73845	4.58189	5.42533	1.20813	7.5592	2.41091	3.26896	1.55287
ENSG00000279928.2	1.07271	1.89071	1.89071	2.7087	1.17338	2.0546	1.17338	2.93582
ENSG00000279457.4	92.3322	63.1451	56.2324	51.6239	79.9894	60.2864	51.9904	71.6934
ENSG00000228463.10	10.2254	15.0202	8.62717	11.0245	7.09985	14.0594	9.70968	5.35997
ENSG00000237094.12	2.47191	1.69386	3.24997	0.137744	0.34373	3.15031	1.27926	0.34373
ENSG00000230021.10	8.21366	2.1378	4.41625	5.17573	6.57311	2.59272	2.59272	2.59272
ENSG00000225972.1	2.35081	4.73325	3.54203	2.35081	3.12498	3.90498	3.12498	10.925
ENSG00000225630.1	1363.29	1297.29	1061.1	1423.11	1473.98	1290.92	992.738	1939.24
ENSG00000237973.1	219.691	242.05	179.271	236.89	238.989	202.61	181.46	279.599
ENSG00000229344.1	7.51637	15.1756	11.346	9.81413	10.4719	10.4719	13.6143	8.37702
ENSG00000248527.1	10071	10735.6	7582.07	9047.45	10221.8	8920.9	7780.51	13854.7
ENSG00000198744.5	7.62649	10.2008	8.48458	10.2008	10.6601	14.511	10.6601	9.8899
ENSG00000228327.3	104.107	60.3162	84.998	83.4056	95.389	67.4771	50.3698	90.8871
ENSG00000237491.10	52.0316	35.1117	49.36	45.7979	66.4742	38.2902	49.5638	58.4216
ENSG00000230092.7	0.381301	0.381301	4.16964	0.381301	3.00115	1.97342	3.00115	3.00115
ENSG00000177757.2	6.16231	2.17155	6.96047	2.17155	3.39022	4.304	7.95913	1.56265
ENSG00000228794.10	538.478	388.484	381.597	435.931	464.85	392.148	489.44	424.223
ENSG00000225880.5	16.7646	12.4724	11.614	15.9061	21.5468	15.8101	13.3515	14.9906
ENSG00000272438.1	21.0478	21.0478	26.1177	13.081	15.417	15.417	16.5508	12.0157
ENSG00000230699.2	53.9877	62.9543	123.479	33.0657	49.9975	52.3735	73.7575	26.2376
ENSG00000241180.1	1.51708	4.53243	0.00940481	0.00940481	0.344843	0.344843	0.344843	2.65271
ENSG00000223764.2	145.503	282.641	767.147	88.2359	136.937	242.689	468.293	122.837
ENSG00000187634.13	381.389	500.879	834.996	174.373	272.522	449.628	631.975	205.452
ENSG00000188976.11	5055.56	2480.62	2148.67	2928.13	4746.35	2564.63	3263.13	2885.64
ENSG00000187961.14	683.345	503.794	557.11	370.503	552.953	459.028	612.471	309.304
ENSG00000187583.11	2.92983	6.95992	6.95992	1.31779	2.56034	7.95084	6.154	0.763504
ENSG00000187642.9	5.70728	1.03349	5.70728	1.03349	1.54582	1.54582	6.28218	0.598543
ENSG00000272512.1	14.8713	22.0634	11.6748	15.6704	12.738	17.2974	14.5617	22.7688
ENSG00000188290.11	242.11	451.337	151.109	287.222	222.225	347.038	269.03	433.821
ENSG00000187608.10	497.373	856.028	524.471	389.776	422.889	796.96	690.606	366.962
ENSG00000224969.1	4.09881	9.66284	5.68853	2.50908	4.37316	7.1328	3.45328	9.89244
ENSG00000188157.15	6828.44	8626.55	9308.95	4323.19	6430.3	8909.08	11727.6	4224.21
ENSG00000217801.10	30.0859	182.492	93.7902	43.7944	33.1663	155.742	182.583	60.9023
ENSG00000273443.1	2.48699	5.15197	9.5936	0.710337	1.86561	14.1068	11.6585	2.68169
ENSG00000237330.3	0.0693333	0.0693333	4.01499	0.0693333	0.245518	1.18205	3.99165	0.245518
ENSG00000131591.18	593.551	494.098	466.975	426.289	497.39	437.417	514.525	481.479
ENSG00000285812.1	27.573	41.8671	44.8763	35.0962	28.8946	19.723	37.149	31.646
ENSG00000186891.14	16.2214	112.485	43.7253	50.1967	17.9454	99.6073	111.147	53.4506
ENSG00000186827.11	12.4881	26.1642	14.3116	24.3407	17.0573	20.3533	40.1294	10.4653
ENSG00000078808.19	4675.14	5687.4	4972	4375.35	3747.09	5186.27	6863.94	4084.42
ENSG00000176022.7	1873.72	1677.59	1727.33	1260.01	1403.09	1347.19	2521.98	1367.74
ENSG00000184163.3	32.8255	54.1878	45.9715	46.7931	29.8046	40.987	58.1906	28.9444
ENSG00000260179.1	10.5272	5.11421	12.0738	7.43408	3.95134	4.88588	8.62402	10.4931
ENSG00000160087.21	1920.34	1546.81	1318.84	1372.75	1436.08	1244.39	1769.59	1321.65
ENSG00000230415.1	10.356	2.79453	6.57527	5.06297	6.3083	6.3083	7.61787	7.61787
ENSG00000162572.21	86.6216	101.958	117.293	38.3135	78.9306	74.8678	110.417	47.444
ENSG00000131584.19	2404	2040.8	2320.19	1773.27	1775.61	1668.72	2706.44	1524.8
ENSG00000169972.12	262.383	195.478	140.737	117.929	225.324	162.189	202.365	196.626
ENSG00000127054.21	3270.54	2192.07	1387.96	2151.9	2794.09	2042.82	1984.67	2028.86
ENSG00000240731.1	62.0139	41.0472	51.5306	33.5591	40.0153	37.4454	47.7249	47.7249
ENSG00000224051.7	619.429	672.96	551.677	443.777	521.462	567.224	759.772	430.8
ENSG00000169962.5	7.23823	13.9667	21.5363	8.92036	9.25018	5.81069	26.4476	10.9699
ENSG00000107404.20	1514.35	1191.88	1376.44	904.663	1171.4	1136.8	2440.87	876.956
ENSG00000162576.17	24.1934	481.296	141.691	18.8871	41.0276	265.669	214.614	31.9512
ENSG00000175756.13	2231.31	1914.04	1744.04	1452.02	1675.07	1512.29	2480.42	1343.51
ENSG00000223663.2	2.58891	1.01478	3.37597	1.01478	0.303143	3.09182	2.16226	1.2327
ENSG00000221978.12	4144.39	5734.73	3562.81	3774.5	3405.1	5018.21	3184.65	3427.44
ENSG00000224870.7	322.058	222.948	271.313	222.155	278.658	223.868	278.658	160.097
ENSG00000242485.6	1644.92	841.033	1011.32	894.728	1247.69	761.085	1314.24	991.912
ENSG00000272455.1	130.469	193.862	147.827	92.7349	142.698	137.098	152.499	158.1
ENSG00000235098.9	4.18876	12.6729	16.5293	4.96004	3.21929	11.0339	12.9875	3.21929
ENSG00000225905.1	0.201826	4.11728	2.5511	0.201826	0.276574	2.19132	4.10606	1.23395
ENSG00000205116.3	0.853846	0.853846	4.76579	0.853846	0.387264	0.387264	4.1581	0.387264
ENSG00000179403.12	31.6084	102.39	63.1617	22.2277	36.2088	123.707	109.404	24.4303
ENSG00000215915.10	0.933254	5.55007	1.70272	0.163784	0.331891	3.38235	3.38235	0.331891
ENSG00000160072.20	2034.04	1267.73	901.663	1350.51	1621.86	1004.08	1365.95	1435.85
ENSG00000284740.1	4.87267	12.2944	12.2944	3.22341	4.88837	12.5066	18.4319	10.8137
ENSG00000197785.14	2132.4	1602.3	1249.17	1551.41	1794.2	1389.53	1989.85	1298.86
ENSG00000205090.9	70.8805	92.0741	96.965	40.7202	71.415	76.7252	111.242	34.2433
ENSG00000160075.12	4022.39	2792.02	2831.81	3208.24	3336.46	2331.36	3575.33	3550.53
ENSG00000215014.5	9.80655	23.599	27.9091	12.3926	9.41743	17.8567	39.7988	16.1688
ENSG00000228594.4	57.5776	145.904	121.569	92.7278	59.5585	113.201	215.533	97.5207
ENSG00000286989.1	1.05592	4.56891	2.81242	0.177671	0.491018	2.99769	7.17548	0.491018
ENSG00000272106.1	68.5359	65.4114	97.4382	79.4719	63.2951	73.8947	92.203	82.5671
ENSG00000197530.12	686.074	1064.59	997.746	627.039	551.694	829.906	1338.28	508.697
ENSG00000189409.14	1.72522	7.75199	3.98526	0.21853	0.51369	3.85732	3.85732	0.51369
ENSG00000248333.9	1397.72	1216.99	1155.69	1198.68	1090.81	961.619	1344.18	937.448
ENSG00000189339.12	1656.23	886.683	1754.83	1250.27	1558.51	1055.23	1683.06	1286.96
ENSG00000269737.2	37.3556	15.2888	56.3787	25.9417	42.5786	27.8248	38.0389	44.8484
ENSG00000008128.23	27.7337	24.4261	12.8492	16.9838	20.6407	14.5368	33.7205	16.2808
ENSG00000268575.1	11.6534	7.01751	27.879	10.1081	13.0325	11.0159	12.0242	25.1316
ENSG00000227775.3	95.869	73.336	156.475	67.12	97.1061	81.4017	145.201	71.5865
ENSG00000215790.8	128.853	66.0063	174.073	80.5684	120.138	72.8013	149.592	109.619
ENSG00000008130.15	1831.95	1367.42	1035.61	1355.35	1504.83	1411.23	1372.54	1169.11
ENSG00000078369.18	16727	11003.5	10675.1	14663.1	14210.3	10979.7	14525.2	16080.9
ENSG00000231050.1	8.49519	2.26598	6.93789	3.04464	6.39475	3.50354	1.57607	7.35848
ENSG00000169885.10	1.95258	8.89531	1.95258	1.95258	2.48279	6.5143	4.49854	0.467031
ENSG00000178821.13	65.5172	32.8558	18.5167	40.0254	60.341	32.8099	14.4558	50.2462
ENSG00000142609.18	1.10516	1.10516	1.95761	1.95761	1.94416	1.1199	2.76843	1.94416
ENSG00000067606.17	32.9069	73.4334	38.4694	78.2012	33.4702	79.0604	62.6479	23.4404
ENSG00000182873.5	33.4248	29.4739	42.1167	16.8312	22.9196	31.292	43.3854	20.1287
ENSG00000162585.17	1318.21	1224.92	1167.77	997.995	1132.9	956.855	1435.18	1087.39
ENSG00000234396.3	0.86341	3.1091	4.60623	0.114846	1.51301	2.66713	0.358881	0.358881
ENSG00000157933.10	3643.83	2949.88	3459.41	4011.87	3075.06	3119.22	3872.79	3896.72
ENSG00000287356.1	43.472	36.3562	136.769	52.1691	50.727	44.2028	134.609	38.6106
ENSG00000116151.14	200.374	96.1525	318.12	127.976	207.484	118.186	328.082	125.55
ENSG00000272161.1	2.85572	1.91718	0.978635	0.978635	4.47737	0.368603	2.01211	0.368603
ENSG00000269896.2	53.1459	43.6469	39.689	48.3964	54.4584	51.7463	42.706	49.0342
ENSG00000272420.1	10.3103	22.1596	27.3437	6.60743	8.54758	11.644	13.1922	14.7404
ENSG00000157916.20	2986.74	2287.92	2301.69	2319.5	2359.68	2193.52	3057.38	2269.45
ENSG00000157911.11	409.473	267.697	455.888	244.068	330.388	278.229	584.343	294.476
ENSG00000149527.18	0.234877	1.97705	2.84814	0.234877	1.13216	3.59412	4.41477	0.311505
ENSG00000157881.16	957.926	592.112	568.762	669.945	859.766	527.012	774.87	648.014
ENSG00000272449.2	6.65498	4.13454	5.81484	4.97469	6.86153	4.2825	6.86153	4.2825
ENSG00000238164.6	0.321994	1.86288	11.1082	3.40376	0.679536	3.71061	8.76241	1.68989
ENSG00000157873.18	93.9822	297.719	191.038	97.1906	86.0822	287.38	235.695	86.9889
ENSG00000157870.17	772.914	678.623	562.443	515.297	676.722	752.119	783.82	434.253
ENSG00000142606.16	0.997181	0.997181	1.99142	0.00293968	0.24487	0.24487	4.30495	0.24487
ENSG00000215912.12	10.4473	2.55888	24.6464	1.77004	6.42007	5.48202	25.181	4.54397
ENSG00000177133.11	0.13613	1.19885	1.19885	0.13613	0.183107	3.32278	2.53786	0.183107
ENSG00000142611.17	36.7349	44.8279	11.6467	14.0746	31.1572	53.5169	16.847	12.3751
ENSG00000130762.15	370.016	165.306	174.137	197.417	377.415	172.155	343.058	241.749
ENSG00000272088.1	0.972925	2.00009	0.972925	0.972925	1.0842	0.273154	0.273154	3.51734
ENSG00000162591.16	39.873	115.149	100.44	16.5114	40.9169	138.695	164.601	23.3671
ENSG00000238260.1	1.14818	4.19067	10.2756	0.387556	1.497	5.93637	5.93637	1.497
ENSG00000158109.15	957.645	1164.96	750.33	826.095	695.031	1096.3	1217.37	859.342
ENSG00000116213.16	810.812	654.738	524.677	553.75	684.92	599.039	745.036	590.451
ENSG00000078900.15	101.288	27.5039	52.9468	72.4531	144.04	48.1562	65.6654	84.8421
ENSG00000227372.12	883.075	651.131	959.029	620.096	702.745	641.956	1065.71	588.215
ENSG00000162592.10	0.9015	0.9015	2.53419	0.0851566	1.11032	0.226025	2.87892	0.226025
ENSG00000235169.11	4.42512	1.91671	2.75285	1.91671	1.36912	0.508639	3.95057	3.95057
ENSG00000130764.10	2035.14	1586.92	1548.39	1397.41	1620.39	1361.19	1953.38	1723.5
ENSG00000272153.1	13.7258	8.11414	6.51082	5.70915	13.5402	9.1307	13.5402	6.48501
ENSG00000116198.14	1085.73	859.457	1053.04	871.19	965.801	839.09	1211.47	901.153
ENSG00000169598.17	193.006	135.55	99.2622	81.8742	154.597	121.542	126.439	103.178
ENSG00000198912.12	1002.59	761.77	605.009	729.206	866.215	674.434	723.549	787.865
ENSG00000236423.6	4.34049	5.97995	12.5378	3.52076	5.47447	9.83018	14.1859	3.73219
ENSG00000235054.4	0.219272	4.38405	5.217	1.05223	0.571875	3.17094	7.5027	0.571875
ENSG00000196581.11	0.26401	0.26401	5.83598	1.19267	0.518158	2.95506	11.0781	0.518158
ENSG00000131697.18	928.664	689.408	803.266	709.41	813.901	648.051	777.767	579.488
ENSG00000069424.15	313.702	243.879	312.019	125.264	210.168	269.487	416.496	117.32
ENSG00000116254.18	15.905	6.0073	27.6023	5.10751	9.66596	17.0629	45.8286	6.37844
ENSG00000116251.11	2743.78	2496.43	2187.23	2752.73	2022.71	1933.33	2101.96	2930.8
ENSG00000226944.1	3.86473	3.86473	2.23877	3.05175	3.0762	4.8092	3.0762	3.9427
ENSG00000158286.13	95.3103	86.8946	59.3523	50.9366	74.5799	82.9558	49.4524	74.5799
ENSG00000116237.16	4966.88	2998.6	2766.05	2935.11	4389.7	3129.52	3917.53	3650.61
ENSG00000225077.3	22.4177	6.0791	27.5773	12.9585	19.4518	6.7637	39.7528	11.839
ENSG00000158292.7	387.717	326.853	209.184	459.941	338.044	370.308	571.744	339.788
ENSG00000097021.20	3114.15	1799.94	1396.88	1874.63	2961.71	1905.07	2851.52	2147.1
ENSG00000069812.11	1.41668	0.446973	13.0532	2.3864	1.19694	1.19694	27.084	2.81488
ENSG00000187017.17	0.432599	2.86902	4.08722	0.432599	0.512066	1.29972	13.9022	2.08738
ENSG00000215788.11	20.6344	179.255	114.632	21.4736	22.6588	158.912	229.182	25.2296
ENSG00000171680.23	116.826	303.608	563.998	46.8981	102.567	377.131	1002.26	95.2125
ENSG00000162408.11	1096.83	596.009	545.303	624.872	993.733	552.734	616.703	851.256
ENSG00000229519.2	6.0101	7.4729	6.7415	4.54729	3.93386	3.93386	2.26221	5.60551
ENSG00000204859.13	417.064	411.873	316.953	345.874	323.34	370.276	350.161	311.047
ENSG00000162413.16	1783.22	1841.29	1952.37	1540.86	1586.34	1847.68	2982.49	1776.26
ENSG00000116273.6	1371.29	975.313	1100	1109.83	1186.43	929.201	1118.96	1019.86
ENSG00000041988.15	440.987	384.887	297.704	300.737	377.566	304.05	368.231	369.398
ENSG00000007923.16	2010.38	963.304	1218.74	1313.1	1755	1126.9	1560.36	1354.15
ENSG00000237436.1	4.40517	8.27073	10.5901	3.63205	8.29723	5.29033	10.3018	6.29263
ENSG00000171735.19	786.779	714.555	802.373	828.636	672.654	614.354	830.065	756.773
ENSG00000049245.13	2773.13	2873.82	2491.56	2660.51	2119.8	2524.19	2807.18	2806.35
ENSG00000269925.1	14.927	9.54805	18.0007	9.54805	10.3829	14.5409	16.6199	12.4619
ENSG00000049246.14	156.657	80.2773	50.6607	86.5123	142.382	89.2355	49.6168	78.6061
ENSG00000236266.1	2.00468	2.8627	2.8627	0.288629	2.91059	2.91059	0.402292	4.58278
ENSG00000049247.14	318.716	42.9724	29.385	215.612	230.81	54.7051	41.9307	338.481
ENSG00000049249.9	83.4281	111.272	231.928	141.9	104.653	109.506	361.022	203.319
ENSG00000116288.13	6447.88	4955.79	5382.1	4983.49	4942.31	4298.64	6776.01	4486.45
ENSG00000200344.1	5.34218	2.86663	2.04145	1.21627	3.98868	3.11746	5.73113	0.503796
ENSG00000284747.1	25.7754	40.9942	125.543	37.6122	33.0985	44.193	165.379	39.9259
ENSG00000284716.1	1.24343	12.117	20.6606	4.35018	8.06446	4.12755	19.8752	8.06446
ENSG00000116285.13	2538.14	6470.16	14949.7	4518.1	2834.74	6734.96	19776.7	5758.2
ENSG00000238290.1	0.226286	2.02358	11.0101	2.02358	0.993322	0.993322	18.3834	1.82142
ENSG00000232848.1	0.141015	1.72533	0.933175	1.72533	0.168441	1.0954	2.02235	1.0954
ENSG00000162426.16	27.827	43.4342	20.0235	27.827	19.7769	37.0636	35.1428	22.658
ENSG00000142599.19	4958.25	2428.91	3936.77	4242.66	5000.11	2564.4	3871.79	4652.02
ENSG00000232912.6	2.00982	1.12374	1.12374	0.237669	2.65424	1.06879	1.06879	3.44696
ENSG00000221083.1	0.933175	1.72533	0.141015	1.72533	1.0954	1.0954	2.02235	0.168441
ENSG00000224315.2	1.14787	0.33765	2.76831	1.14787	2.76804	1.10144	1.93474	3.60133
ENSG00000226545.1	1.01565	4.32958	2.67262	1.01565	0.443602	4.79548	0.443602	3.05473
ENSG00000228423.2	1.96985	8.34403	1.17308	5.15694	2.57204	1.65867	1.65867	8.96569
ENSG00000074800.16	75916.8	43251.1	31088.9	50305.1	68883.5	42024.8	51238.3	49866.1
ENSG00000230679.1	1.72149	3.29143	2.50646	0.936523	1.30045	0.414484	0.414484	3.07239
ENSG00000180758.12	7.56462	9.42447	3.8449	8.49455	12.7057	12.7057	4.11551	15.0484
ENSG00000228526.7	1.12156	1.12156	1.12156	0.115766	1.00521	1.00521	3.35998	1.00521
ENSG00000049239.13	579.687	781.676	734.683	540.938	552.066	730.687	773.175	408.128
ENSG00000171621.14	283.752	368.951	401.039	368.951	276.629	355.741	616.019	411.119
ENSG00000284693.1	6.12017	9.18249	8.41691	2.29228	6.07954	9.09195	9.09195	9.09195
ENSG00000171612.7	1070.02	554.697	718.519	864.846	820.262	473.303	731.463	1039.97
ENSG00000231181.1	4.94225	9.57361	4.17036	13.4331	10.6883	6.77202	1.87673	7.75108
ENSG00000188807.13	1260.01	715.941	616.446	884.925	1307.03	751.312	813.679	940.276
ENSG00000171608.16	145.598	251.418	256.142	252.363	136.991	248.064	398.053	269.144
ENSG00000231789.2	20.5169	5.42437	10.7068	12.216	13.623	7.31118	4.15527	11.5191
ENSG00000171603.18	3759.6	3414.4	5196.01	3327.45	3458.57	3803.12	6172.09	3206.46
ENSG00000178585.15	369.304	316.493	685.327	348.347	294.451	328.071	793.58	309.968
ENSG00000285701.1	1.9818	3.73348	1.9818	1.9818	2.13536	1.29606	4.65327	2.13536
ENSG00000162441.12	2051.3	1378.54	1310.19	1278.7	1689.18	1167.64	1463.14	1694.36
ENSG00000228150.1	7.03125	4.45614	13.0399	1.88103	4.71577	7.21291	19.6986	7.21291
ENSG00000173614.14	127.122	224.864	201.375	101.36	110.93	160.922	188.577	108.803
ENSG00000202415.1	1.86066	0.293697	1.86066	0.293697	1.9049	1.03556	2.77423	1.9049
ENSG00000162444.12	10.9938	23.4066	6.56072	18.9735	8.05061	18.0589	6.38256	34.7394
ENSG00000130939.20	2405.41	1747.09	2208.84	1828.03	2290.06	1774.07	2011.2	2158.77
ENSG00000201746.1	1	1	1	1	3	0	2	1
ENSG00000054523.18	3699.69	2358.32	4148.87	2623.67	3369.16	2331.19	3781.69	3170.58
ENSG00000199562.1	2.69346	6.46847	2.69346	2.69346	3.47754	3.47754	2.47062	0.456792
ENSG00000284735.1	27.4373	30.5062	38.1786	21.2994	19.893	25.6332	21.8064	34.2436
ENSG00000284642.1	32.8253	22.3402	35.8211	15.5997	29.3854	22.6159	21.2619	23.9698
ENSG00000142657.21	14478.4	10007.2	8703.06	8103.45	13376.5	10069.4	11589.7	7650.98
ENSG00000251503.8	1.70215	3.28052	0.123778	0.123778	0.238502	3.05007	2.11288	0.238502
ENSG00000175279.22	44.8023	45.5404	55.1354	41.1119	37.343	36.3669	44.1755	44.1755
ENSG00000241563.4	8.24669	5.26242	11.977	10.4849	7.83466	6.76837	8.90096	4.63578
ENSG00000160049.12	1699.28	1156.95	958.484	711.55	1574.75	945.001	1113.28	1205.16
ENSG00000142655.13	592.064	380.512	492.414	520.185	534.178	377.038	625.989	511.225
ENSG00000287727.1	7.34305	0.39008	2.70774	2.70774	5.40796	2.40241	4.40611	0.398705
ENSG00000130940.15	50.6714	69.445	46.4046	65.1782	60.3113	94.095	93.3272	65.686
ENSG00000272078.1	5.11455	10.8946	7.59173	7.59173	3.86811	11.7062	7.35171	6.48081
ENSG00000175262.14	9.3124	5.5127	1.713	13.872	9.14703	2.7399	3.80776	9.14703
ENSG00000215785.2	0.917495	1.7838	1.7838	1.7838	0.322399	0.322399	1.98365	1.98365
ENSG00000120948.19	7240.35	4231.76	5078.55	4955.7	6258.28	3832.49	5300.92	5550.97
ENSG00000009724.17	58.3552	41.7544	28.172	54.5823	48.52	36.476	23.4283	39.487
ENSG00000116649.10	4184.99	3913.62	2446.65	2338.1	3753.97	3506.26	3904.76	2788.96
ENSG00000171824.14	2048.4	1089.54	1087.19	1276.77	2016.96	1250.45	1234.31	1573.39
ENSG00000226849.1	9.3902	7.60064	5.81108	7.60064	3.93655	6.42767	11.4099	5.59729
ENSG00000230337.1	5.57123	3.90624	20.5561	14.7287	7.28961	6.4257	28.0233	11.6091
ENSG00000198793.13	3772.04	1420.55	2604.47	2303.23	3394.76	1506.83	2690.94	2709.48
ENSG00000171819.5	1.90047	9.62357	4.2174	1.12816	0.673182	5.60508	6.59146	0.673182
ENSG00000120942.14	731.71	571.631	464.401	569.333	656.738	559.772	584.014	683.088
ENSG00000204624.8	1.94791	6.52408	4.23599	1.94791	2.45691	3.46071	4.4645	0.449309
ENSG00000116661.11	15.2587	39.0402	43.1404	7.05816	10.8685	41.6613	50.4592	7.34936
ENSG00000132879.14	396.464	522.593	285.811	228.55	341.946	484.599	320.152	234.957
ENSG00000116663.11	150.911	219.856	140.609	110.495	104.53	199.638	168.545	95.385
ENSG00000116670.15	2018.56	1471.87	1590.28	1363.54	1799.64	1333.66	2155.57	1362.04
ENSG00000162490.7	132.551	370.341	618.623	198.992	193.578	483.588	944.968	313.042
ENSG00000177674.16	484.558	395.454	431.262	263.047	423.564	428.724	579.226	288.543
ENSG00000177000.13	470.033	444.958	643.939	231.418	420.61	414.344	729.435	280.072
ENSG00000011021.23	1430.21	1328	1441.66	828.414	1378.29	1403.87	1619.07	815.578
ENSG00000175206.10	18.4921	4.10674	4.10674	5.621	11.806	8.27218	7.09424	3.56043
ENSG00000285646.2	70.1926	16.8547	58.3398	33.1524	26.9303	19.4894	44.2924	30.6508
ENSG00000201801.1	14.6237	3.97886	10.822	3.97886	11.2123	3.03402	7.12316	3.03402
ENSG00000116685.16	2162.24	1441.4	1671.14	1769.36	1785.1	1389.94	2338.85	1688.04
ENSG00000083444.17	5773.23	6909.28	5643.54	3645.59	4890.28	6686.02	6961.88	3263.23
ENSG00000287384.1	2.31127	2.31127	3.696	3.696	1.44621	2.2376	10.1515	2.2376
ENSG00000116688.18	7685.28	3530.56	4870.01	5844.02	7112.64	3565.68	5637.73	5621.23
ENSG00000116691.11	1074.09	917.166	731.572	807.017	840.307	721.59	941.755	774.473
ENSG00000202461.1	3.24006	2.50459	2.50459	1.76912	1.43245	1.43245	2.2685	0.596404
ENSG00000120949.15	5.51104	9.56531	18.6874	4.49748	5.49445	5.49445	37.6757	7.10351
ENSG00000028137.19	6.23888	27.9986	69.0072	40.5522	9.64398	35.5118	90.6964	25.1647
ENSG00000048707.15	913.387	704.08	1093.24	773.849	874.643	705.93	1021.06	713.686
ENSG00000239149.1	3.29602	2.5287	5.59798	0.226731	0.487844	0.487844	4.40534	2.44659
ENSG00000162496.9	13.9299	201.682	34.8744	34.8744	26.0322	90.6666	49.5356	39.2529
ENSG00000204518.3	4.34005	7.58829	1.09181	16.5209	1.61068	1.61068	1.61068	18.4219
ENSG00000162494.6	1.32326	11.4928	5.56058	8.10298	3.05615	16.9911	11.2532	11.2532
ENSG00000162493.17	992.313	1258.3	1444.85	859.319	968.362	1184	1916.85	1012.15
ENSG00000116731.22	1725.67	1116.63	1389.89	1304.2	1505.56	1085.56	1303.04	1504.57
ENSG00000189337.17	332.877	570.234	363.043	282.866	335.54	565.996	461.83	312.495
ENSG00000231606.2	3.55415	2.74581	1.93747	2.74581	3.06224	1.34149	1.34149	3.06224
ENSG00000234593.3	11.2249	7.39654	4.33382	12.7563	7.81093	2.92432	6.83361	10.7429
ENSG00000175147.13	0.992456	0.992456	3.14236	3.14236	0.491385	0.491385	8.55025	0.491385
ENSG00000171729.14	45.8469	87.3804	54.5399	63.233	61.0244	87.6357	144.772	65.7205
ENSG00000142621.19	69.4625	32.0503	26.4783	82.1985	48.6121	25.6572	40.3483	91.7674
ENSG00000233485.1	1.66097	0.118528	2.43219	1.66097	2.15376	0.254466	1.20411	0.254466
ENSG00000236045.1	5.20846	2.093	1.31413	7.54507	7.28131	3.40163	1.4618	3.40163
ENSG00000228140.2	4.48362	1.46181	9.01632	3.72817	2.22134	5.81988	4.62037	4.62037
ENSG00000142634.13	1731.11	1906.88	1689.7	1036.35	1478	1868.53	2743.76	1085.82
ENSG00000162438.12	4.41073	0.612553	12.7667	4.41073	2.65259	3.76051	9.30014	3.76051
ENSG00000215704.10	0.232771	1.74963	5.54177	2.50805	3.54554	0.287162	2.45942	1.37329
ENSG00000132906.18	201.392	198.428	235.977	214.238	154.457	190.356	284.184	178.933
ENSG00000116138.13	602.978	502.159	738.726	433.888	511.763	486.807	768.721	522.855
ENSG00000116771.6	25.2682	33.9423	19.7482	24.4796	21.0399	32.2882	21.0399	28.5388
ENSG00000237301.1	6.78132	2.96467	5.25466	2.96467	2.40012	2.40012	5.38977	4.39322
ENSG00000235084.3	6.0778	4.60261	6.0778	3.12741	4.50765	3.35	4.50765	3.35
ENSG00000197312.12	1298.31	736.671	882.397	783.933	1215.23	651.192	912.025	999.597
ENSG00000116786.13	2170.65	1463.99	1946.58	1776.81	1752.88	1503.96	2548.74	1625.88
ENSG00000237938.5	30.2543	28.7559	23.5114	16.7684	24.7415	20.455	23.6699	16.1685
ENSG00000162461.8	41.6891	44.7908	72.7062	54.0959	32.6179	34.4542	44.5534	64.7519
ENSG00000162458.13	1248.21	2632.01	1175.26	1151.2	1063.41	2367.94	1476.92	1255.4
ENSG00000224321.1	1.13014	6.42171	1.13014	1.13014	2.26038	3.56622	3.56622	2.26038
ENSG00000233954.6	332.51	212.082	222.314	208.146	269.481	173.347	301.525	232.724
ENSG00000178715.8	19.5754	13.8745	13.8745	21.2042	16.5877	8.67548	20.1042	18.3459
ENSG00000179743.4	81.9474	82.736	135.575	71.6951	82.5562	81.6178	136.047	90.0637
ENSG00000065526.12	3184.94	1624.96	2205.88	1983.36	3270.58	1833.35	2150.7	2570.77
ENSG00000116809.12	1240.7	1087.05	1059.44	1375.03	1050.04	983.216	1630.86	1212.57
ENSG00000184908.18	7.52824	11.2953	7.52824	0.747473	6.06648	7.14039	4.99256	0.696909
ENSG00000185519.9	15.1335	57.1252	8.13494	9.69018	7.01641	48.1818	28.5792	12.8972
ENSG00000142627.13	2669.29	3791.85	2300.52	3608.28	2597.38	3839.83	4423.75	3585.17
ENSG00000227959.1	4.59209	1.31136	3.77191	1.31136	3.06176	1.33831	4.78522	5.64695
ENSG00000224621.1	1.77275	0.951588	1.77275	0.951588	0.245331	1.10919	1.97306	1.10919
ENSG00000142632.17	140.817	117.475	100.697	138.629	110.456	111.703	99.2358	111.703
ENSG00000237276.8	7.28043	9.92679	11.691	5.51619	6.62605	16.4886	8.2698	10.7354
ENSG00000288398.1	102.295	146.485	222.735	86.6986	87.9209	123.243	296.489	125.766
ENSG00000132881.12	67.0375	56.2544	144.178	58.7428	70.5437	75.7555	166.963	43.6159
ENSG00000233929.1	5.30319	4.55154	6.80647	2.29662	4.46961	2.24823	4.46961	4.46961
ENSG00000037637.11	954.003	873.276	922.889	756.389	844.299	698.579	1030.92	769.309
ENSG00000055070.17	3888.38	2265.11	3980.44	1965.11	3197.9	2495.23	5109.05	2362.22
ENSG00000226457.1	1.00563	3.39036	1.00563	1.80054	2.11646	0.28103	3.03417	1.19874
ENSG00000187144.11	1.88391	5.59352	3.73872	1.88391	1.54693	1.54693	8.97156	0.721973
ENSG00000157191.20	1447.96	1208.53	525.568	1179.37	1146.58	1194.35	678.249	1278.46
ENSG00000226029.1	23.762	39.9017	34.0327	22.2947	21.7316	19.4704	21.7316	28.5151
ENSG00000080947.15	90.9512	79.432	143.172	60.2333	90.7883	88.7515	117.266	53.1078
ENSG00000206652.1	0.750602	8.51363e-06	4.50357	8.51363e-06	0.270568	0.270568	1.63421	1.63421
ENSG00000233421.4	15.5202	1.29598	5.78783	4.29054	5.55178	3.04731	1.79508	8.05624
ENSG00000219481.10	906.647	574.743	862.445	602.66	811.721	685.757	963.072	758.992
ENSG00000271732.1	1.0287	0.108321	2.86945	2.86945	1.22216	0.400088	1.22216	6.15462
ENSG00000215908.10	1195.16	902.839	1086.95	979.487	900.867	767.557	1051.77	930.491
ENSG00000186301.8	18.5609	28.499	172.984	23.1477	18.1636	44.5112	124.608	20.2714
ENSG00000236698.1	18.5321	5.0874	10.6234	16.1595	10.8492	8.0561	21.0907	9.91819
ENSG00000058453.17	776.683	559.442	389.529	333.667	681.163	487.215	459.092	257.386
ENSG00000186715.11	2.66561	10.2803	36.1703	7.23443	4.02438	9.40235	25.5363	7.25116
ENSG00000228549.4	81.4678	19.3038	43.3924	28.6284	66.2151	20.3232	54.498	23.2524
ENSG00000238142.2	6.11876	10.6026	9.85529	9.85529	5.76052	5.76052	8.62488	8.62488
ENSG00000207005.1	56.9387	3.87229	32.2741	9.85161	19.2142	4.62466	30.1563	8.27204
ENSG00000272426.1	2.57279	0.174605	0.174605	1.77339	0.198103	2.01098	1.10454	2.91742
ENSG00000117122.14	252.12	888.211	581.945	296.882	208.631	671.561	732.72	219.922
ENSG00000226526.1	1.96952	0.970351	0.970351	1.96952	3.57308	0.319056	1.94607	0.319056
ENSG00000159363.19	1623.18	2346.32	1448.69	1206.49	1375.1	2354.38	2708.89	1197.43
ENSG00000117118.10	3583.28	1736.97	1625.52	2587.25	3046.29	1693.72	2146.84	3190.2
ENSG00000117115.13	1148.86	462.943	229.333	412.411	1493.96	754.506	358.429	676.311
ENSG00000204362.6	12.1378	10.4716	2.14073	12.9709	8.55727	13.7329	3.38168	18.0458
ENSG00000142623.11	37.3953	71.5564	17.0832	42.9349	20.5754	115.639	40.2437	35.3266
ENSG00000142619.4	6.77188	1.26518	2.05185	0.478511	6.87316	3.15298	4.08303	1.29289
ENSG00000179051.14	5534.53	3807.41	4377.26	4542.47	5086.39	3757.66	4241.56	4050.6
ENSG00000074964.17	34.6523	178.851	53.9302	21.5433	31.9656	137.47	92.8333	28.9222
ENSG00000117148.8	6.2765	2.24584	4.66424	7.08264	4.36393	1.6836	7.9377	4.36393
ENSG00000117154.12	34.3311	8.93896	3.38442	45.4402	34.3484	7.51522	6.58994	46.3771
ENSG00000009709.12	2838.19	767.993	649.966	1287.31	2780.18	900.769	834.659	1397.54
ENSG00000159423.17	955.533	853.222	317.052	678.601	922.8	810.612	497.721	608.879
ENSG00000169991.11	784.737	768.415	935.471	923.95	722.263	777.165	1175.41	693.583
ENSG00000272084.1	13.4122	7.41129	8.91152	5.91106	12.2149	13.0143	16.212	13.8138
ENSG00000127481.15	9294.69	4127.46	8497.93	6101.45	8814.87	4707.63	8423.8	6605.31
ENSG00000230424.1	5.40434	0.552032	3.78691	1.36075	7.43454	3.08673	3.95629	2.21716
ENSG00000127463.15	2789.22	2198.66	3904.3	2443.22	2399.29	2337.9	3834.92	2753.48
ENSG00000053372.5	3720.73	1912.07	1684.06	2319.56	2974.99	1569.08	2368.08	2857.49
ENSG00000286064.1	58.4691	21.1829	31.7203	33.3415	47.506	25.5643	65.0594	37.8517
ENSG00000211454.15	22.5191	28.6079	18.7136	23.2802	23.937	16.5964	15.6788	22.1019
ENSG00000162482.5	17.5939	30.4421	12.3035	13.815	16.0723	21.0614	8.08963	8.08963
ENSG00000270728.1	61.5078	42.4255	43.8933	52.7006	42.5056	39.5395	33.6073	47.4492
ENSG00000053371.13	1030.35	1062.96	1350.57	826.344	962.162	966.481	1508.95	833.454
ENSG00000200403.1	2.54406	1.04051	6.30293	2.54406	1.46828	3.63775	2.55301	0.383536
ENSG00000040487.13	623.883	842.129	470.155	508.388	463.427	804.808	750.665	539.595
ENSG00000077549.19	4717.45	4560.77	8097.21	4215.41	4063.56	4505.91	8804.51	4270.22
ENSG00000173436.15	101.181	121.041	124.351	74.7002	89.2742	97.0308	148.741	127.195
ENSG00000158747.15	434.439	829.865	2142.65	622.099	488.503	815.04	2689.82	540.198
ENSG00000226396.1	5.48583	3.89979	7.07187	6.27885	6.18214	1.84254	5.31422	4.4463
ENSG00000158748.4	1.16658	2.1462	5.08506	3.12582	3.08078	2.27475	9.52901	1.46872
ENSG00000162542.14	289.07	403.03	356.761	276.218	261.086	464.806	342.574	289.097
ENSG00000169914.6	1437.57	1140.79	1004.16	1118.02	1273.05	1201.17	1041.43	1152.11
ENSG00000162545.6	31.7191	65.4942	77.4148	47.6132	43.538	39.5392	137.11	76.3283
ENSG00000090432.7	827.44	742.423	644.023	675.511	673.132	697.381	820.489	632.096
ENSG00000183114.8	1.69469	8.99088	4.82163	1.69469	4.28104	6.64625	21.6259	2.70423
ENSG00000158825.6	2.2427	16.8616	8.09026	8.09026	2.1588	17.0003	59.9627	2.93994
ENSG00000158828.8	120.585	420.426	483.974	109.845	112.53	384.849	835.129	130.739
ENSG00000117242.7	56.7981	60.6211	69.7964	39.9768	49.6587	66.5298	57.0398	48.6043
ENSG00000244038.11	6759.56	7661.92	6269.97	6205.4	5346.41	7222.99	7092.09	5443.73
ENSG00000117245.13	16.5364	29.1882	26.6579	24.1275	13.3792	25.387	33.1063	22.8139
ENSG00000189410.12	169.811	193.753	58.0818	99.5812	158.336	232.289	87.9909	152.023
ENSG00000127483.19	5563.02	3338.81	3812.08	4734.79	5134.11	3599.03	3454.94	5321.61
ENSG00000075151.22	2899.8	2064.97	2365.23	1666.95	2902.68	2249.34	2562.36	2094.3
ENSG00000233072.1	3.36893	15.29	1.13373	4.85907	6.31924	4.81961	1.82034	3.31997
ENSG00000287192.1	1.68417	0.86987	3.31278	0.0555674	0.326343	0.326343	3.85943	0.326343
ENSG00000117298.16	1671.17	2798.79	3461.92	2212.58	1754.54	3088.04	5438.82	2064.32
ENSG00000236936.1	2.62253	0.0819323	1.77566	0.928798	0.291108	0.291108	3.71394	1.14682
ENSG00000231105.2	5.08346	7.36598	9.64849	1.27928	1.93037	3.87739	7.77144	0.956855
ENSG00000227001.3	12.5045	11.6992	16.5311	6.86718	11.4152	14.1126	17.7092	7.81863
ENSG00000187952.9	11.6599	2.66125	7.91047	13.1597	10.4436	4.99869	3.90971	6.08768
ENSG00000142794.19	193.459	128.745	203.046	127.147	183.844	146.452	222.149	130.947
ENSG00000162551.14	92.5422	161.813	63.0825	131.557	95.9807	174.713	71.2626	87.7413
ENSG00000076864.19	1225.87	701.024	489.245	1350.17	1196.31	899.267	675.697	1204.71
ENSG00000090686.16	2424.61	1761.55	2152.25	1838.93	2005.51	1685.13	2085.87	2088.04
ENSG00000142798.20	409.462	652.774	714.412	132.088	357.136	688.008	798.596	134.177
ENSG00000218510.8	52.0176	12.6667	55.8755	30.4131	52.7303	19.3	45.639	36.5217
ENSG00000070831.17	6378.37	5089.82	9636.65	4382.7	5153.54	5135.7	10499.1	5048.29
ENSG00000285752.1	17.7155	9.48763	16.2195	14.7235	12.9807	9.82369	15.0854	10.876
ENSG00000230068.2	0.15663	0.964572	3.3884	1.77251	0.29376	1.19037	3.88019	1.19037
ENSG00000271428.1	0.265649	1.02993	4.08705	0.265649	3.20733	2.14531	1.08329	2.14531
ENSG00000162552.15	3.04197	4.03542	4.03542	5.02886	3.25085	4.05981	7.29563	3.25085
ENSG00000285873.1	11.9039	5.69897	11.1283	8.02583	4.30295	6.05984	11.3305	3.42451
ENSG00000184677.18	1317.55	833.143	1206.89	995.643	1208.19	851.684	1171.24	1142.28
ENSG00000237200.1	6.02067	2.87608	1.30378	5.23453	4.26847	0.509913	4.26847	5.20811
ENSG00000133216.17	411.674	303.786	427.723	235.131	367.302	352.433	604.375	242.57
ENSG00000004487.17	6210.98	4477	3701.02	4737.71	5524.61	3875.59	4132.84	5194
ENSG00000169641.13	1403.46	1340.33	2470.04	1932.24	1346.68	1423.16	2699.59	2053.46
ENSG00000229010.1	1.20584	1.20584	2.08285	2.95986	2.82171	2.82171	4.42424	1.21918
ENSG00000179546.4	8.58234	94.7435	40.784	22.5074	16.838	139.368	67.6836	19.3386
ENSG00000261326.4	106.882	113.362	113.362	92.9979	123.403	109.375	77.1926	116.801
ENSG00000284726.1	4.67346	3.87046	5.47646	2.26446	4.14014	2.32988	4.14014	5.9504
ENSG00000125944.21	7408.29	4120.66	4489.34	6311.63	6610.36	3980.76	5080.09	6833.48
ENSG00000125945.15	526.973	621.127	1108.24	572.105	490.999	598.588	1016.34	600.527
ENSG00000249087.7	37.2475	60.2208	124.546	56.3919	61.3905	48.0152	100.488	37.7264
ENSG00000204219.11	39.3763	44.9386	29.8408	26.6623	35.3824	40.7333	16.654	29.1396
ENSG00000088280.19	193.45	589.115	313.107	89.7476	219.145	621.138	325.366	119.333
ENSG00000007968.7	1212.37	258.815	251.627	484.027	1282.64	324.401	325.313	624.648
ENSG00000235052.1	0.37913	2.72988	1.9463	5.86421	3.22464	0.357895	5.13581	3.22464
ENSG00000117318.9	2531.77	3886.9	2925.56	1741.15	2022.08	3302.44	2622.49	2282.51
ENSG00000142676.14	13389.4	12396.1	8545.31	10789.4	11167	9955.82	9609.07	11795.1
ENSG00000236810.6	39.476	44.6862	23.1011	27.567	25.6948	24.617	21.3833	35.3956
ENSG00000011007.12	2665.02	1514.98	2562.92	1763.51	2264.5	1546.11	2815.82	1736.38
ENSG00000057757.10	2068.9	1385.75	1836.49	1487.48	1564.52	1024.42	1891.12	1482.2
ENSG00000011009.11	1466.16	1017.25	1637.14	1150.32	1239.6	892.003	1882.43	1122.87
ENSG00000117308.15	743.681	595.145	634.87	434.517	591.07	562.331	899.588	421.173
ENSG00000117305.15	512.694	734.467	769.24	501.876	419.202	561.116	736.643	463.083
ENSG00000179163.12	473.043	755.456	609.408	438.346	388.497	714.06	672.023	406.385
ENSG00000189266.13	2124.17	1628.69	2189.73	1244.5	1723.16	1373.45	2091.71	1538.88
ENSG00000188529.15	5667.44	2758.74	3776.05	3761.26	4878.32	2783.84	3507.66	4735.12
ENSG00000142677.4	13.1597	9.54286	14.9681	11.3513	17.0123	9.77292	18.6211	12.9904
ENSG00000185436.12	140.824	81.7557	84.1184	103.808	133.172	105.077	124.743	80.728
ENSG00000158055.16	2.39586	5.11383	9.6438	4.20784	2.79613	10.1636	13.4381	2.79613
ENSG00000001460.18	315.805	231.91	279.365	302.246	289.158	225.974	354.049	290.012
ENSG00000001461.17	373.837	679.495	724.649	366.022	388.932	666.055	1012.67	399.816
ENSG00000286061.1	0.0829195	0.0829195	2.61186	0.9259	1.07509	0.22035	3.6393	0.22035
ENSG00000117602.13	481.588	478.457	494.11	322.715	423.837	476.328	555.542	413.339
ENSG00000133226.17	3298.5	2193.59	2176.95	2450.4	3018.56	1942.81	1808.68	2678.23
ENSG00000284699.1	2.4767	0.0484986	0.857899	1.6673	0.271245	0.271245	2.92719	0.271245
ENSG00000169504.15	9543.18	9619.22	15958.6	7902.07	8280.12	9752.3	14621.7	11497.4
ENSG00000020633.19	944.808	893.927	969.428	1690.79	780.187	920.272	1579.55	1650.46
ENSG00000229162.1	0.426607	4.33037	5.89188	3.54962	1.44254	2.39595	6.20957	2.39595
ENSG00000117614.10	872.793	1234.52	1134.73	850.341	697.069	983.557	1350.29	825.643
ENSG00000284602.1	21.9098	14.0138	33.7539	23.489	27.3094	20.8161	20.8161	35.658
ENSG00000284657.1	0.32375	1.08415	2.60495	6.40696	2.37681	2.37681	4.636	1.24722
ENSG00000117616.18	1002.4	1125.83	1398.86	1381.69	1086.59	1167.78	1165.14	1596.72
ENSG00000272432.1	5.11116	5.11116	4.01733	2.92351	1.72101	4.9451	9.78124	1.72101
ENSG00000259984.1	2.47194	0.925925	1.69893	0.152919	2.14464	1.15525	1.15525	0.165862
ENSG00000183726.11	3223.64	3087.02	3690.18	2681.3	2551.62	2695.38	3941.88	2924.36
ENSG00000188672.19	11.3376	12.1781	17.2207	3.77372	8.90083	10.621	22.662	4.60047
ENSG00000204178.11	890.468	869.641	1268.7	566.389	708.873	810.23	1493.74	675.087
ENSG00000157978.12	280.989	266.288	136.304	204.391	275.468	266.454	187.328	189.331
ENSG00000117643.15	4.1166	17.7777	13.7597	4.1166	9.5622	14.9288	21.1898	5.09004
ENSG00000162430.17	1567.69	1660.35	1236.41	1030.23	1446.54	1569.47	1424.38	1068.69
ENSG00000228172.5	3.3201	3.3201	7.13831	0.265527	0.575934	1.5774	5.58325	1.5774
ENSG00000117640.18	556.109	444.211	632.628	409.654	531.506	346.656	667.296	471.933
ENSG00000127423.11	407.378	167.551	154.399	350.129	325.362	184.006	174.051	371.153
ENSG00000236528.1	0.245593	1.03764	1.03764	2.62173	1.0766	1.98356	1.0766	2.89051
ENSG00000182749.6	167.088	201.722	217.885	84.7352	129.926	155.945	219.992	113.914
ENSG00000117632.23	15591.5	10671	9032.65	8415.3	13205	8232.42	9859.68	10924.9
ENSG00000229786.1	2.62557	3.36645	12.2571	3.36645	1.75057	4.83691	3.29374	3.29374
ENSG00000223624.1	0.0871477	0.851924	5.44058	0.0871477	0.283915	0.283915	3.48561	2.41838
ENSG00000158006.14	326.546	277.651	307.143	190.725	233.416	290.747	322.813	210.095
ENSG00000158008.10	0.958018	4.1018	0.958018	4.88774	0.524445	5.1301	1.44558	0.524445
ENSG00000175087.10	332.995	182.861	254.864	165.243	285.643	179.305	262.48	202.468
ENSG00000197245.6	16.7997	7.80618	3.3094	8.55564	9.64784	4.08472	2.97209	8.53521
ENSG00000236782.7	2.97447	2.97447	3.80497	0.482941	4.68637	2.16393	5.52719	2.16393
ENSG00000142675.18	12.3551	18.4335	15.3943	5.51684	16.2146	6.47266	8.42105	6.47266
ENSG00000130695.16	1660.1	466.469	846.119	909.394	1557.4	549.24	931.281	1017.14
ENSG00000270733.1	2.1503	1.34327	2.1503	1.34327	3.45048	1.97563	3.45048	2.71306
ENSG00000142669.15	3036.15	4207.02	6609.4	2218.65	2998.56	3878.08	9368.44	3053.53
ENSG00000158062.20	439.455	349.431	504.109	354.341	373.457	360.238	547.061	352.307
ENSG00000176092.17	1.85608	7.87992	1.85608	1.1031	2.53387	3.83214	1.23561	3.83214
ENSG00000131914.11	0.985212	0.214478	4.06815	2.52668	2.26043	0.246538	1.25349	3.26738
ENSG00000117682.17	1044.97	757.314	913.027	585.209	894.404	848.786	1169.87	602.272
ENSG00000223583.1	4.22601	1.83846	1.04261	2.63431	0.409911	4.03298	2.22145	1.31568
ENSG00000225891.2	4.15178	4.97347	9.90363	5.79516	10.6363	3.61413	7.1252	4.4919
ENSG00000198830.11	12629.7	5757.89	5773.26	6749.13	10957.5	5722.48	6871.63	6755.27
ENSG00000117676.14	284.868	259.243	237.622	220.005	244.027	262.176	279.417	207.73
ENSG00000260063.1	12.9488	5.26106	14.4864	4.49229	9.82859	3.73238	12.8767	7.79652
ENSG00000117713.20	3954.84	2215.05	3856.66	3324.75	4039.62	2220.79	3678.19	3945.88
ENSG00000060642.11	191.822	165.36	385.612	152.13	197.601	195.652	352.549	144.002
ENSG00000204160.12	1295.52	1163.94	617.88	1124.4	1163.43	1139.96	803.59	1056.15
ENSG00000175793.12	7.05977	18.8443	20.3173	4.11365	3.7491	15.5119	82.9519	4.53328
ENSG00000142751.15	975.548	778.184	723.628	720.419	818.324	664.826	931.189	914.034
ENSG00000198746.13	432.48	319.73	295.515	383.294	323.844	301.324	393.548	320.627
ENSG00000090273.14	6138.36	3468.91	3910.5	4488.95	5200.84	3124.39	5789.91	4313.56
ENSG00000253368.4	40.769	250.787	310.792	89.4219	53.1754	272.543	351.016	81.711
ENSG00000158246.8	151.711	462.107	220.6	171.507	143.08	456.453	267.685	204.452
ENSG00000090020.11	1469.62	1162.75	1602.47	1386.35	1266.32	1137.19	2013.12	1292.64
ENSG00000214973.3	3.3052	0.166056	0.950841	0.166056	0.177784	1.12335	2.06892	3.01449
ENSG00000225159.1	7.75827	3.30546	7.75827	9.24254	6.86402	3.70026	3.70026	5.80944
ENSG00000142784.16	969.417	670.791	942.855	689.305	852.159	701.848	1041.17	630.742
ENSG00000186501.15	1217.33	1057.71	1014.41	1000.82	1009.8	909.076	1275.27	1045.65
ENSG00000206888.1	0.103072	1.67814	1.67814	1.67814	2.05636	0.233104	0.233104	1.14473
ENSG00000241547.1	10.1324	2.10067	6.91971	10.9356	9.13415	6.44011	5.5421	14.5222
ENSG00000142765.18	79.5005	95.9568	29.3481	88.9041	96.7025	71.0083	33.8945	85.2828
ENSG00000142733.17	196.71	296.917	234.72	132.786	138.335	349.285	291.906	145.086
ENSG00000174950.11	2.644	0.933805	0.933805	0.0787064	0.257309	3.65569	0.257309	1.1069
ENSG00000181773.7	163.585	74.9269	109.757	109.757	147.614	81.5336	143.025	146.697
ENSG00000158195.11	5068.05	4210.21	4105.3	4131.52	4652.54	4195.08	4874.31	4595.86
ENSG00000126705.15	735.552	1076.24	1318.1	504.945	748.543	1080.26	1434.58	572.289
ENSG00000000938.13	0.157575	2.81713	0.157575	1.04409	0.261433	0.261433	4.36828	2.72554
ENSG00000235912.1	3.14134	2.38299	6.17473	4.65803	4.17455	4.17455	5.3776	4.17455
ENSG00000126709.16	149.927	325.058	235.792	109.97	114.235	360.16	335.483	110.832
ENSG00000225886.3	1.19389	2.82672	2.0103	2.82672	2.07936	2.07936	3.83231	2.07936
ENSG00000009780.16	390.874	372.794	305.748	241.716	285.915	339.78	281.127	343.371
ENSG00000231344.1	4.45229	1.42492	2.18176	5.96597	4.44426	4.44426	3.19278	3.19278
ENSG00000230833.1	0.975751	0.975751	0.975751	1.95385	0.262455	0.262455	2.70992	1.8941
ENSG00000117758.14	814.36	1128.47	877.028	681.381	701.1	909.623	983.648	760.529
ENSG00000269971.1	1.629	0.884198	1.629	1.629	0.349835	1.17903	0.349835	1.17903
ENSG00000270031.1	4.36483	2.84552	6.64378	4.36483	3.4956	0.760938	4.40715	3.4956
ENSG00000117751.18	1696.28	1171.5	1261.31	1497.15	1438.54	1105.73	1441.43	1595.33
ENSG00000130775.16	84.1084	60.4909	72.2997	31.8125	59.266	77.9875	109.474	38.8426
ENSG00000117748.10	2131.28	1276.51	1560.9	2115.25	1801.78	1154.9	1945.33	2219.71
ENSG00000130768.15	9.37411	16.3929	1.57549	6.25466	13.2596	13.2596	3.65791	12.2995
ENSG00000158156.9	289.322	303.559	233.212	218.975	284.759	275.421	351.829	223.633
ENSG00000158161.16	906.278	554.392	776.387	631.539	851.19	560.724	780.688	835.209
ENSG00000238231.2	2.17574	3.77765	3.77765	3.77765	4.02759	2.21177	3.11968	4.02759
ENSG00000240750.3	1.04722	0.25738	1.83707	2.62691	2.03202	1.10499	1.10499	2.95906
ENSG00000228589.3	12.5265	14.9512	11.7182	17.3759	12.6428	16.1174	13.5114	7.43086
ENSG00000169403.12	8.61382	1.00082	2.52342	1.00082	5.84501	0.473888	2.62234	1.54811
ENSG00000126698.11	4479.22	3513.33	2872.96	3674.18	3671.81	3227.14	3764.72	4092.14
ENSG00000130770.18	1739.86	1635.26	1370.72	1097.09	1524.95	1373.7	1406.04	1053.47
ENSG00000270605.1	35.0265	32.0858	29.1451	35.0265	28.596	13.9644	24.5317	44.8533
ENSG00000271398.1	0.87753	0.87753	7.5862	2.36834	1.77462	0.378158	3.17107	1.77462
ENSG00000130766.5	929.609	698.359	945.234	1476.48	741.209	689.562	1235.68	1220.38
ENSG00000130772.14	367.123	279.889	369.793	319.945	299.696	263.888	399.624	415.446
ENSG00000204138.13	2151.69	1603.89	1610.49	1718.57	1805.03	1317.86	1400.93	2136.43
ENSG00000229820.2	4.88112	2.61019	1.09624	1.85322	3.42594	2.34279	1.25964	1.25964
ENSG00000221216.1	0.923772	2.45103	1.6874	2.45103	0.383718	2.14495	0.383718	1.26433
ENSG00000180198.16	4016.53	1479.06	1797.89	1754.45	3606.25	1647.34	2631.25	1942.31
ENSG00000242125.3	2051.01	656.491	686.582	858.422	1807.16	673.611	735.711	1696.87
ENSG00000200087.1	121.64	21.9772	49.5762	44.9764	77.0062	20.3657	18.3429	75.9947
ENSG00000231468.2	9.73489	4.8487	5.66306	7.29179	9.48257	11.0858	6.27604	11.8875
ENSG00000279443.1	76.2657	83.9635	71.6471	50.863	42.3822	55.307	70.0781	73.7709
ENSG00000180098.9	666.451	492.502	578.306	451.16	468.465	381.141	626.567	498.799
ENSG00000197989.14	495.82	238.598	255.592	310.435	427.299	254.541	345.942	407.211
ENSG00000221539.1	10.4455	1.85818	4.20017	5.76149	11.0022	5.27274	6.22765	5.27274
ENSG00000120656.12	332.545	380.001	320.876	268.752	274.591	349.515	357.299	308.647
ENSG00000188060.8	102.169	110.453	150.37	87.1062	69.7107	91.4858	120.835	72.5509
ENSG00000229388.1	2	2	2	2	2	4	3	4
ENSG00000162419.13	729.313	420.652	615.469	484.789	631.608	353.884	667.004	633.423
ENSG00000198492.16	3036.27	2611.78	2198.73	2346.08	2441.17	2216.19	2444.32	2818.57
ENSG00000116329.11	46.7821	99.6469	85.2292	69.2096	44.3026	92.4403	91.5321	87.899
ENSG00000233427.1	0.952256	0.148646	1.75587	2.55948	2.94575	1.13832	0.23461	1.13832
ENSG00000159023.22	9329.18	2365.14	1948.15	6090.4	9162.54	3179.14	2208.89	6699.94
ENSG00000253304.2	27.9566	39.2951	73.3105	28.7125	26.967	37.0921	53.9672	29.217
ENSG00000116350.17	4659.15	2878.07	3232.45	3369.16	3997.41	2686.98	3502.61	3260.94
ENSG00000116353.16	539.569	335.277	291.989	285.913	434.215	293.746	348.853	260.249
ENSG00000237934.1	6.68899	2.85425	2.85425	4.38814	5.3297	1.49803	3.41386	2.45595
ENSG00000060656.20	228.706	348.553	197.546	175.974	228.619	358.248	229.532	173.846
ENSG00000162510.6	3.7792	6.46967	7.3665	5.57285	3.64694	9.45026	5.30503	1.1598
ENSG00000186056.10	3.13489	8.87544	20.3565	3.95497	2.73695	4.49595	23.845	4.49595
ENSG00000223382.5	0.201326	5.44981	8.07405	1.07607	0.875517	2.55395	13.4638	0.875517
ENSG00000162512.16	416.538	1126.3	1428.76	437.16	457.329	1102.74	2001.91	349.056
ENSG00000134644.16	2857.29	2276.65	3096.06	2447.19	2642.32	2310.54	3071.15	2991.66
ENSG00000237329.2	0.142295	1.01312	1.88394	1.01312	0.216351	2.70219	1.87357	1.04496
ENSG00000232768.1	1.96557	2.98241	1.96557	2.98241	0.511648	2.9473	2.13541	4.57107
ENSG00000084628.10	27.5941	96.484	26.8113	20.5485	39.6864	93.5544	64.2578	31.181
ENSG00000060688.13	2469.88	1417.2	1354.06	1791.45	2125.09	1286.27	1699.04	1937.1
ENSG00000229447.2	26.0855	6.3929	11.9068	16.633	13.9728	6.43884	20.5651	23.3903
ENSG00000121766.16	1028.19	613.902	836.855	929.279	804.481	548.302	1064.22	892.542
ENSG00000121769.8	145.161	1011.11	551.866	122.516	203.404	1448.49	1402.23	157.139
ENSG00000168528.12	14.507	107.962	42.1974	15.3723	14.3957	145.639	107.429	22.7023
ENSG00000142910.16	6.90699	121.701	32.8536	36.7849	8.56094	114.545	54.929	44.5199
ENSG00000121764.11	5.34638	2.97255	4.55511	5.34638	3.38058	5.12859	1.63256	4.25458
ENSG00000162517.13	1368.23	1324.97	863.725	1301.79	1317.51	1118.92	1137.06	1460.65
ENSG00000235790.7	16.1131	24.4909	14.4376	11.9243	12.3442	27.8387	11.4834	11.4834
ENSG00000084636.18	1153.39	3900.84	1754.56	899.577	972.476	3046.92	1516.1	705.718
ENSG00000121753.13	189.068	423.609	253.25	76.5517	191.345	390.757	360.15	107.87
ENSG00000254545.1	0.208859	0.208859	4.94865	0.208859	0.263911	3.03348	4.87987	1.1871
ENSG00000134668.12	83.693	387.685	497.531	142.448	107.11	338.235	728.257	157.244
ENSG00000269967.1	5.70877	6.58359	3.95912	6.58359	3.5653	3.5653	5.24158	8.59414
ENSG00000184007.22	6492.88	5516.29	5198.91	5756.85	5039.25	4992.94	6530.45	6303.21
ENSG00000228634.1	1.22035	2.06028	2.06028	4.58005	1.31344	2.16253	3.86072	5.5589
ENSG00000121774.18	6276.51	4229.19	4486.17	4305.27	5721.78	3821.32	4637.48	4981.24
ENSG00000203325.3	5.10631	6.52549	5.10631	4.39671	3.03962	3.03962	4.67904	3.03962
ENSG00000121775.18	584.747	468.8	360.531	527.157	565.65	438.192	466.4	534.308
ENSG00000025800.14	3344.07	2070.68	2482.06	2562.14	2971.65	1893.91	2594.73	2889.26
ENSG00000084652.16	2901.87	2327.34	2184.09	2544.49	2640.51	2324.86	2264.29	2412.22
ENSG00000160050.16	251.739	181.236	262.707	156.951	198.977	159.09	252.462	114.671
ENSG00000160051.12	134.116	70.9897	84.0769	96.3942	113.555	69.6009	74.5957	103.565
ENSG00000222046.2	6.97699	4.671	12.3576	3.90234	3.83608	5.77913	9.66521	1.89304
ENSG00000160055.20	47.0012	76.1467	69.0811	32.87	45.8022	55.8194	110.079	34.9502
ENSG00000084623.12	7311.99	4499.28	5167.87	5006.32	5552.78	3987.45	6321.52	5583.61
ENSG00000220785.7	14.912	41.0126	30.0672	14.912	17.4283	38.8589	46.5739	9.71325
ENSG00000183615.6	1.96818	29.9536	25.8381	1.96818	5.60044	29.977	40.4242	4.72985
ENSG00000116478.12	6994.66	3644.93	3937.59	5216.32	6324.96	3510.71	4571.44	4992.53
ENSG00000175130.7	6292.59	6096.27	5380	5291.25	5799.19	4905.66	7090.03	5686.15
ENSG00000233775.1	0.210502	0.210502	1.13228	2.05407	3.40936	1.03408	3.40936	0.242322
ENSG00000162526.7	8.99564	5.90441	12.0869	6.67721	6.65534	6.65534	3.83604	10.4144
ENSG00000225828.1	16.7545	58.8902	45.8664	33.6088	17.1377	50.4019	33.7698	20.0728
ENSG00000160058.19	1336.35	1464.82	1597.24	1307.69	1219.61	1433	1933.9	1197.62
ENSG00000273274.2	11.3084	15.753	20.1975	10.4195	11.8826	13.5402	27.6296	12.7114
ENSG00000160062.15	250.179	411.83	172.433	155.499	170.336	298.277	155.104	323.662
ENSG00000176261.15	724.63	695.314	663.554	544.66	565.498	508.079	769.074	617.697
ENSG00000200591.1	1.77351	3.31462	3.31462	1.00295	3.17716	1.32377	1.32377	0.397085
ENSG00000162521.19	5310.93	3558.78	3713.31	1940.08	5199.16	3829.29	3890.24	2493.29
ENSG00000162520.15	6.36404	35.1702	23.4677	2.76327	4.78892	36.0289	57.4036	3.96682
ENSG00000162522.11	269.459	700.014	725.521	143.966	258.584	942.865	1744.5	249.862
ENSG00000134684.12	7814.08	3694.39	2903.54	5975.72	6167.16	3771.8	3617.46	6914.84
ENSG00000116497.18	1153.86	690.97	1145.92	899.788	926.871	671.392	1212.79	1031.09
ENSG00000160097.20	29.1423	107.392	124.958	21.1576	29.7937	100.159	135.799	21.5692
ENSG00000121905.10	0.641224	2.96671	0.641224	4.51703	2.93493	5.55875	4.68414	2.93493
ENSG00000121900.19	51.0923	103.323	51.0923	61.8456	54.4722	87.555	80.3182	77.2166
ENSG00000287691.1	4.68946	1.25188	3.83006	3.83006	1.4799	5.70666	5.70666	2.32525
ENSG00000116514.17	588.432	561.148	792.517	604.803	500.353	556.29	1181.98	641.793
ENSG00000004455.17	4457.07	2897.84	3438.66	3398.08	3667.2	2829.7	4185.71	3373.26
ENSG00000276645.1	0.789395	6.02738	0.0411108	0.789395	0.232961	1.78037	1.78037	1.78037
ENSG00000142920.17	59.2626	160.567	189.16	56.8117	50.6958	154.083	222.124	56.8813
ENSG00000278997.1	3.32579	8.25651	6.61294	4.96936	2.64127	8.77981	7.02594	6.14901
ENSG00000116525.14	116.871	198.031	182.423	57.5621	110.519	181.838	180.874	68.1131
ENSG00000279179.1	8.1854	19.058	16.7282	8.96201	7.19228	18.6671	11.0172	9.10476
ENSG00000284721.1	0.0485132	2.29081	3.78568	0.0485132	1.57142	0.264628	1.57142	0.264628
ENSG00000160094.15	663.088	875.474	792.964	536.268	660.099	693.089	732.871	445.664
ENSG00000270115.1	4.52677	2.00059	5.36883	1.15853	7.50167	1.48881	3.20677	1.48881
ENSG00000184389.9	4.58143	5.39165	14.304	5.39165	2.31318	4.07938	14.6766	2.31318
ENSG00000225313.5	112.63	88.8371	148.729	69.1465	120.931	103.608	176.364	86.2855
ENSG00000134686.18	3736.59	3797.7	2542.34	3514.6	3316.1	3456.71	4177.46	3638.62
ENSG00000284154.1	3.67205	2.00603	1.17302	1.17302	4.61717	2.06895	2.91836	1.21954
ENSG00000222112.1	19.7236	12.4273	26.2093	14.8594	26.1766	16.6267	28.7811	16.6267
ENSG00000233246.1	2.96244	0.221541	2.04881	2.96244	6.16927	2.90457	1.27222	1.27222
ENSG00000121903.14	116.235	83.2106	108.372	90.2872	84.3657	94.6227	117.934	86.2306
ENSG00000121904.17	191.572	156.95	161.896	147.058	154.292	145.32	238.302	113.51
ENSG00000142698.15	7.99296	1.06301	1.06301	4.14299	4.55214	0.564088	0.564088	5.54915
ENSG00000163866.9	868.442	927.666	853.427	699.944	649.471	713.584	1011.37	639.347
ENSG00000189280.3	0.15143	0.976514	7.57719	1.8016	0.618297	1.4922	9.35729	0.618297
ENSG00000188910.8	2.96086	0.60426	5.31747	1.78256	1.50648	9.27802	14.7181	0.72933
ENSG00000187513.9	2.73334	1.05699	1.89517	0.218811	1.99104	1.99104	3.69496	0.287117
ENSG00000116544.12	1.15967	1.15967	3.50588	5.07002	1.29428	1.29428	4.17306	4.17306
ENSG00000284773.1	4.87608	7.07486	4.14315	1.21144	2.91032	2.91032	2.91032	1.54663
ENSG00000241014.2	2.00804	5.32584	2.00804	2.00804	3.11347	3.11347	5.72018	0.506759
ENSG00000163867.17	314.397	355.667	354.842	311.095	253.546	262.659	317.335	362.07
ENSG00000197056.11	732.627	382.815	425.632	575.898	607.56	367.668	356.927	733.772
ENSG00000284640.1	0	0	8	5	0	0	0	0
ENSG00000116560.11	17560.3	9518.33	10754.3	12496.8	15395.1	8776.2	10496.6	13748.7
ENSG00000146463.12	2657.16	1821.05	1616.77	1792.55	2642.92	1793.88	1683.34	2125.51
ENSG00000229994.1	9.12502	11.5353	6.71475	9.92844	9.37056	8.51825	8.51825	2.55209
ENSG00000142687.18	1274.02	1428.88	1605.63	1274.78	1093.17	1236.55	1445.77	1122.03
ENSG00000020129.16	867.378	651.765	909.687	572.842	769.62	663.047	1024.51	582.23
ENSG00000239636.1	3.4324	1.92589	4.9389	3.4324	2.42257	3.34313	2.42257	0.581434
ENSG00000116819.8	14.7064	22.3942	10.8626	7.7875	8.82645	19.0608	14.9671	10.8733
ENSG00000126067.12	5793.12	4112.54	4719.11	4010.79	5011.62	3715.53	5595.65	4890.03
ENSG00000142686.8	1013.95	456.402	640.455	528.791	843.47	494.595	772.063	517.038
ENSG00000092853.14	2843.69	1151.34	1056.12	1721.91	2559.38	1266.32	1530.72	2095.44
ENSG00000134698.11	414.11	588.442	619.297	315.373	354.697	545.739	512.139	269.256
ENSG00000092847.13	2505.46	1338.36	1833.11	1556.4	2508.34	1356.65	1781.59	1536.25
ENSG00000286899.1	0.181765	1.67855	4.67214	2.42695	2.60387	0.249597	1.42673	1.42673
ENSG00000126070.20	833.484	721.579	1020.51	694.19	767.978	687.41	978.029	875.401
ENSG00000271554.1	3.51101	7.24267	2.01834	4.25734	4.70967	1.4878	2.56176	2.56176
ENSG00000232862.5	1.10271	3.38475	7.94884	0.342026	0.25733	4.70777	3.59516	3.59516
ENSG00000092850.12	28.1749	31.9874	57.1495	24.3625	27.3613	35.7827	44.204	21.0453
ENSG00000116863.11	1036.83	1007.72	884.92	907.661	849.365	874.18	1176.93	789.807
ENSG00000171812.13	32.2137	41.8693	25.7767	21.7536	23.7436	44.4715	23.7436	28.2497
ENSG00000054116.12	2137.13	1629.6	1459.16	1689.93	1631.1	1379.2	1735.42	1753.17
ENSG00000116871.15	6067.29	5828.22	7138.39	4498.29	5019.19	5466.52	9523.64	4346.97
ENSG00000054118.15	4349.15	2720.84	3530.69	3174.67	4002.79	2854.3	3861.38	2886.78
ENSG00000214193.11	90.484	248.735	157.075	59.9307	87.6933	201.831	191.368	47.7452
ENSG00000286379.1	12.5159	20.8202	15.5356	2.70162	6.85071	16.1191	12.6434	9.1678
ENSG00000196182.11	4943.58	4105.48	2629.79	5568.88	4486.77	3636.31	4071.43	5549.59
ENSG00000181817.6	1256.76	657.302	779.371	1039.83	994.794	620.672	1091.75	1049.64
ENSG00000116885.18	119.772	154.88	541.847	153.32	108.149	166.031	488.241	166.996
ENSG00000116898.12	2086.07	1098.56	1095.49	1264.16	1730.7	941.708	1412.61	1307.62
ENSG00000163873.10	2	1	1	5	0	0	0	0
ENSG00000233621.2	34.7157	29.7994	26.5219	15.0505	19.0244	24.2964	40.9913	17.267
ENSG00000163874.11	136.218	109.055	101.562	107.182	110.054	96.9526	165.737	105.141
ENSG00000163875.16	1562.36	1257.07	1730.07	1127.62	1307.27	1126.36	1893.45	1307.27
ENSG00000263675.1	2.74356	0.361963	4.33129	2.74356	4.05371	3.129	3.129	0.354883
ENSG00000163877.11	546.222	387.965	529.179	518.628	434.494	394.519	593.507	518.886
ENSG00000163879.11	232.964	260.151	545.224	321.515	207.472	246.024	489.861	279.756
ENSG00000134697.13	2955.66	1911.35	2214.57	2405.16	2430.56	1821.11	2695.26	2646.27
ENSG00000116922.14	689.686	450.184	425.461	530.533	562.382	388.942	536.316	592.458
ENSG00000134690.11	2179.94	1051.5	927.937	1212.59	2117.39	1096.13	1174.91	1397.8
ENSG00000183317.17	0.114576	1.81792	1.81792	2.6696	0.330115	2.03527	0.330115	3.74043
ENSG00000185090.15	41.6257	52.7691	36.4826	40.7685	48.9043	65.4423	41.0291	55.992
ENSG00000196449.4	958.873	535.862	1028.56	506.689	748.761	455.05	1205.84	731.799
ENSG00000197982.14	531.925	707.361	552.565	382.686	389.013	497.584	714.727	424.595
ENSG00000188786.10	665.254	401.047	748.018	652.521	583.56	384.99	770.234	641.21
ENSG00000204084.13	445.233	321.426	383.714	364.489	406.781	307.199	290.602	356.068
ENSG00000252448.1	0.217037	0.217037	4.10342	0.217037	2.07912	0.158178	3.03959	3.03959
ENSG00000183431.12	5131.03	3169.54	3305.9	3765.85	4444.59	2895.67	3564.11	4094.21
ENSG00000212541.1	12.4051	10.0839	31.7486	6.98891	10.3303	13.3323	28.3421	12.3316
ENSG00000183386.10	2165.79	1826.02	1222	1565.61	1933.78	1819.5	1613.81	2179.23
ENSG00000183520.12	2535.22	1476.64	1218.87	789.014	2157.91	1352.53	1552.8	1109.41
ENSG00000185668.8	2842.21	903.683	1117.94	1527.62	2659	869.097	1172.95	1682.86
ENSG00000224592.5	41.7579	20.9876	26.3725	13.2949	37.0612	19.9625	16.945	18.9566
ENSG00000215895.4	4.1217	6.38251	1.10727	1.10727	1.33802	3.67325	1.33802	3.67325
ENSG00000116954.8	772.587	1228.75	841.93	827.727	602.005	943.491	1059.91	1259.11
ENSG00000228436.3	19.7915	33.7309	23.6636	12.8217	23.3238	33.8116	30.9513	22.3704
ENSG00000214114.9	250.412	181.223	368.198	257.001	235.803	146.569	392.401	256.8
ENSG00000131233.10	0.167027	0.167027	1.12065	1.12065	0.960005	2.5175	0.181256	2.5175
ENSG00000158315.11	12.48	49.299	23.7511	22.2483	17.9607	33.2705	23.064	20.5124
ENSG00000174574.16	3200.77	2249.18	2815.08	3454.25	2349.13	2052.31	3204.41	3780.03
ENSG00000168653.11	3632.56	3122.68	3609.46	3017.46	2834.27	2556.02	4025.01	2856.84
ENSG00000127603.30	11085.2	5440.82	15558.1	8648.73	10332	7541.96	18844.6	10019.1
ENSG00000222378.1	0.889673	2.39794	1.64381	0.13554	0.103516	1.22773	1.22773	1.22773
ENSG00000287422.1	0.873388	2.39081	3.14953	0.114675	0.264434	0.264434	2.33423	1.29933
ENSG00000183682.8	11.2633	15.9747	18.8014	5.60976	8.46879	14.981	32.8895	8.46879
ENSG00000237624.1	1.6292	12.4319	12.4319	0.798225	3.991	8.31411	20.4188	2.26175
ENSG00000243970.3	15.8345	19.8541	15.8345	13.4227	18.0571	19.8622	15.3495	13.5443
ENSG00000090621.15	4732.69	3326.42	2262.96	3225.87	3969.47	3177.78	2914.26	3908.06
ENSG00000228060.3	16.8317	5.50814	10.7925	7.77285	10.0515	6.55952	7.7235	12.3794
ENSG00000163909.8	68.6384	101.185	43.6605	65.6108	59.5467	71.4286	41.1838	74.6691
ENSG00000116983.13	1.14791	0.151981	0.151981	1.14791	0.962963	1.7444	3.30727	0.181528
ENSG00000084072.17	1334.13	925.801	994.903	1093.06	1033.2	830.499	1251.86	1090.45
ENSG00000116985.12	3.80649	1.48503	8.44942	8.44942	5.55447	3.59471	8.49411	1.63495
ENSG00000198754.5	0.201826	2.5511	4.11728	0.201826	0.276574	2.19132	4.10606	1.23395
ENSG00000043514.17	1067.78	670.085	1030.42	838.97	815.604	600.486	984.287	953.962
ENSG00000202222.1	0.104094	6.16253	0.104094	1.6187	1.4511	1.4511	0.288444	3.77641
ENSG00000116990.11	23.6496	12.6144	15.7673	15.7673	12.7644	17.465	23.1057	16.5249
ENSG00000168389.18	214.339	97.8944	97.8944	145.102	207.545	96.1419	161.673	166.354
ENSG00000228477.1	3.66524	1.27668	6.05379	2.86905	6.0029	1.41004	2.32861	4.16576
ENSG00000131236.18	8942.64	7047.85	9407.38	7410.64	7268.25	7407.33	11865.5	7914.3
ENSG00000131238.18	3673.04	2507.8	3147.19	3975.83	3017.65	2348.61	3126.77	4211.72
ENSG00000117000.9	935.792	574.061	1082.23	767.195	909.044	585.428	1045.74	972.279
ENSG00000188800.6	0.0213695	4.51252	0.0213695	1.51842	0.287788	1.65554	1.65554	0.287788
ENSG00000259943.1	145.528	100.475	196.796	121.448	140.878	94.042	178.933	133.072
ENSG00000084073.10	2843.53	1975.71	2379.61	2203.62	2417.85	1788.31	2648.79	2700.51
ENSG00000049089.15	184.343	448.013	440.371	163.708	185.514	330.401	371.653	112.064
ENSG00000084070.12	2104.89	847.307	1389.82	1187.74	1786.17	792.453	1599.91	1174.73
ENSG00000284677.1	1.7837	1.03842	6.25541	2.52899	2.7714	1.36191	2.7714	1.36191
ENSG00000187801.15	231.468	85.8699	246.359	206.65	224.656	115.027	315.442	276.044
ENSG00000260920.2	309.964	216.423	236.067	344.574	273.503	187.867	307.758	470.875
ENSG00000279667.1	31.062	23.0929	17.5145	16.7176	22.589	18.9223	18.9223	32.6722
ENSG00000187815.10	225.012	113.286	156.56	210.063	194.562	108.125	159.799	221.809
ENSG00000238287.1	9.84105	5.53745	9.84105	10.7018	14.1663	8.30596	6.63157	11.6547
ENSG00000164002.11	189.955	118.909	211.687	183.268	166.581	122.514	253.851	164.852
ENSG00000238186.1	12.1539	17.8537	13.7824	9.71113	15.2459	9.19574	15.2459	4.87416
ENSG00000117010.17	148.142	113.478	108.525	153.92	145.393	93.835	121.798	163.744
ENSG00000117016.10	615.99	540.017	298.919	394.273	535.334	539.231	301.532	358.034
ENSG00000287743.1	0.263592	3.30589	1.78474	0.263592	2.18559	2.18559	1.05287	2.18559
ENSG00000237899.1	7.76174	1.60956	6.99272	9.29979	7.60411	2.70331	2.70331	7.60411
ENSG00000272145.1	40.0654	17.0367	31.8409	21.9714	45.9275	20.8189	24.2822	39.001
ENSG00000066136.20	1574.22	665.13	1099.5	1321.83	1471.33	684.115	1222.59	1437.79
ENSG00000117013.17	50.5571	34.3865	14.9819	30.3439	55.0172	33.5358	15.6346	24.5852
ENSG00000179862.7	30.8937	171.939	63.5749	71.3152	34.4029	155.066	229.961	74.3466
ENSG00000171793.16	4382.42	2013.03	2013.79	2447.53	3784.19	1993.86	2685.79	2908.16
ENSG00000281207.1	32.1363	23.0797	19.7864	16.4931	35.8609	19.2148	17.4626	20.0909
ENSG00000171790.15	28.922	9.7356	14.3403	14.3403	24.7535	14.4471	18.5697	22.6922
ENSG00000010803.16	691.58	446.2	334.736	430.964	722.863	446.15	362.683	413.489
ENSG00000204060.7	83.4037	123.555	23.5704	58.998	84.0753	132.991	54.9142	56.7955
ENSG00000229901.1	0.865321	5.32717	0.865321	1.60896	1.65622	1.65622	1.65622	0.223059
ENSG00000127129.10	0.459056	7.05349	7.05349	0.459056	0.949962	6.61336	17.1311	1.75902
ENSG00000127124.16	248.673	147.326	141.137	238.615	222.891	172.361	200.103	262.522
ENSG00000230638.4	4.91652	8.19703	3.27627	7.3769	3.56448	7.96303	8.84274	3.56448
ENSG00000198815.9	1344.34	983.451	1355.59	1244.67	1213.14	907.247	1261.58	1388.96
ENSG00000227527.2	2.46965	0.958273	3.22534	0.958273	1.26821	1.26821	2.28779	0.248633
ENSG00000177181.15	3.2596	4.79761	4.02861	0.952592	6.45218	3.9102	4.75753	5.60486
ENSG00000066185.13	1.72149	3.29143	2.50646	0.936523	0.414484	3.07239	1.30045	0.414484
ENSG00000127125.9	931.899	849.192	812.27	772.393	720.326	734.545	841.187	698.997
ENSG00000186409.18	67.9436	86.7615	50.762	82.6706	60.5336	70.2104	49.0974	98.361
ENSG00000171960.12	619.493	477.771	423.381	398.101	495.091	392.535	533.153	512.007
ENSG00000285728.2	78.1584	49.6024	51.982	70.2262	79.4032	51.8642	45.4385	61.9619
ENSG00000234917.2	1.35975	1.35975	0.561257	2.15825	4.09115	2.62277	1.88858	3.35696
ENSG00000065978.19	44726	27500.8	28002.1	31962.8	39287.7	25377.8	36759.4	30646.5
ENSG00000164007.11	1.62958	0.102513	0.866045	3.15664	0.234468	1.25425	2.27402	0.234468
ENSG00000117385.16	1620.15	3092.67	2617.11	1439.26	1440.43	2846.75	3280.55	1396.34
ENSG00000164008.16	87.2323	65.1072	77.3141	68.1589	84.1326	75.0983	84.1326	81.1212
ENSG00000274386.5	30.514	17.2056	34.2107	15.7269	22.3119	13.0108	21.1492	15.336
ENSG00000177868.12	335.168	291.652	164.103	191.864	256.995	200.672	190.432	253.155
ENSG00000164010.15	96.2843	107.905	165.232	132.695	77.2807	105.698	147.376	117.065
ENSG00000228192.8	19.2997	9.46305	17.7863	10.9764	15.1421	8.54487	14.0426	14.0426
ENSG00000164011.18	274.955	212.733	176.311	169.481	243.135	189.541	205.852	202.357
ENSG00000117394.24	1165.49	2626.13	2694.45	1067.35	1139.6	3374.2	5047.35	1384.68
ENSG00000227533.6	3.57375	24.0534	14.9514	3.57375	5.30712	10.8637	17.5315	5.30712
ENSG00000186973.11	7.31233	10.4028	20.4467	12.7206	16.8576	11.9875	10.0395	5.16939
ENSG00000117395.13	4299.29	2810.42	2819.8	3360.14	3270.53	2589.77	3883.99	3773.42
ENSG00000243710.8	4.59956	24.5486	13.0395	22.2468	4.41924	20.6541	14.566	16.5954
ENSG00000179178.11	1.16301	46.0099	7.34879	8.89523	3.76683	37.736	13.7578	5.76502
ENSG00000066056.14	1.27876	3.99424	12.1407	2.18392	1.19059	3.66552	20.1651	2.84054
ENSG00000117400.18	4.30508	3.48846	12.4713	3.48846	6.25187	7.98937	14.9393	3.64564
ENSG00000234694.1	6.52664	7.6088	5.44448	4.36232	13.8793	4.53717	7.65122	7.65122
ENSG00000117399.14	5550.16	2368.74	2742.8	3369.09	5038.54	2261.27	3155.48	3989.82
ENSG00000066322.15	2299.73	2180.16	1627.55	1559.69	1848.93	2100.61	2548.63	1610.64
ENSG00000159479.17	657.882	1025.67	1015.91	695.312	577.607	852.514	1145.98	660.698
ENSG00000229431.1	5.09361	9.85799	15.4164	8.26986	10.2167	12.9322	16.5529	7.50111
ENSG00000198198.17	438.95	356.165	654.038	278.795	392.605	436.372	584.585	279.207
ENSG00000142949.17	4438.72	4059.94	3786.84	2814.51	3779.89	4502.15	4814.98	2630.27
ENSG00000066135.13	685.187	486.505	592.267	697.274	542.003	502.606	650.611	597.372
ENSG00000236200.6	86.2954	44.2473	36.7387	41.2438	53.227	32.5211	39.8291	55.6629
ENSG00000126091.21	79.5533	63.0192	78.7266	54.7521	72.622	50.8266	71.7501	88.3146
ENSG00000229444.1	0.166056	0.950841	3.3052	0.166056	0.177784	1.12335	2.06892	3.01449
ENSG00000233674.2	3.0868	15.0805	1.58758	8.33405	3.5139	6.46598	7.94201	6.46598
ENSG00000117407.17	436.249	132.9	172.296	206.965	411.176	130.257	286.115	305.714
ENSG00000237950.3	70.8098	45.7989	52.8332	50.4885	64.8688	38.5746	33.3157	41.204
ENSG00000288573.1	35.2048	15.1789	19.03	15.1789	30.5281	14.3119	19.3794	17.3524
ENSG00000117408.11	1934.63	1438.28	1554.87	1043.54	1653.94	1327.83	2198.92	1101.19
ENSG00000285649.1	3.86113	4.69958	3.02267	1.34576	2.27322	3.12302	6.52221	3.97281
ENSG00000132768.14	756.275	530.634	559.164	699.217	643.345	532.047	739.693	906.641
ENSG00000117410.14	3765.48	2850.58	2940.93	2547.07	2657.91	2517.72	4389.66	2678.9
ENSG00000117411.18	2458.38	1898.95	1166.81	1382.33	2172.08	1846.95	1854.53	1402.59
ENSG00000159214.13	104.272	115.303	143.668	56.2084	63.9972	90.4308	144.21	53.9706
ENSG00000196517.13	907.254	827.323	451.96	1127.46	801.338	957.834	611.443	1163
ENSG00000230615.7	14.8338	40.8514	68.3993	29.373	14.1494	26.2571	55.5175	27.2661
ENSG00000233514.1	4.97138	4.02151	2.12176	1.17188	2.31125	0.687565	8.80597	4.74677
ENSG00000178028.14	846.603	536.859	773.078	547.81	701.042	524.154	813.008	486.518
ENSG00000117419.16	1803.75	1598.27	1277.73	1446.59	1494.44	1282.35	1523.52	1438.69
ENSG00000233602.1	2.06376	0.397966	3.72955	2.89666	4.66168	2.12138	4.66168	1.27462
ENSG00000187147.18	824.527	716.618	526.235	740.512	764.042	575.923	617.95	766.043
ENSG00000126106.14	76.1131	113.877	91.562	59.8058	74.7722	114.245	133.561	63.0144
ENSG00000198520.12	4.82209	21.1594	6.37802	3.26615	2.29719	17.8683	9.10957	4.24358
ENSG00000200169.1	26.5501	0.501748	25.8058	1.99022	11.6228	2.3924	12.9414	2.3924
ENSG00000142945.13	3512.39	1268.88	2088.27	2579.42	3103.55	1296.76	2146.68	2930.71
ENSG00000225721.5	7.97017	3.14088	5.55552	7.97017	8.0925	1.88577	7.20583	3.65912
ENSG00000142937.12	15015.1	13402.2	11235.7	10851.3	11692	10531.6	12369.7	11050.9
ENSG00000200913.1	13.5488	4.39658	5.15926	8.20999	9.80517	5.46528	5.46528	9.80517
ENSG00000234093.3	3.50557	1.07755	1.07755	1.88689	2.08481	1.19131	1.19131	3.87183
ENSG00000142959.5	6.67161	19.581	8.94974	5.15286	3.8617	11.4109	12.4893	6.01861
ENSG00000173846.13	269.86	345.219	178.413	237.684	235.248	366.239	425.556	248.43
ENSG00000188396.4	5.14099	8.74186	8.74186	5.14099	3.82358	11.2658	10.4389	5.4774
ENSG00000222009.8	154.549	304.456	155.322	130.595	138.585	264.343	208.004	148.646
ENSG00000117425.14	61.2598	61.2598	55.6261	52.4069	48.7825	62.0435	50.4401	42.152
ENSG00000226499.1	2.49424	3.97344	1.75465	1.75465	2.36214	0.439747	1.40094	1.40094
ENSG00000070785.17	1444.88	770.985	816.218	850.717	1189.27	696.291	1055.29	916.089
ENSG00000268949.1	0.852212	1.62823	0.852212	2.40424	2.07652	0.302822	0.302822	0.302822
ENSG00000126107.15	1429.85	962.433	935.658	1090.95	1141.21	1021.95	1320.63	1103.61
ENSG00000126088.14	1767.07	1884.71	1814.46	1311.77	1391.74	1655.57	2200.3	1275.63
ENSG00000162415.7	7.24881	6.32998	10.0053	7.24881	8.83566	7.23678	13.6323	8.03622
ENSG00000281912.1	2.15133	4.49801	17.7959	9.19137	8.61653	7.65841	18.1978	5.74217
ENSG00000186603.6	181.317	58.8105	54.9822	70.2955	142.952	46.242	76.399	66
ENSG00000132781.19	29.3315	15.5756	26.2746	22.4535	26.005	19.5459	21.6989	27.0815
ENSG00000132773.12	520.444	206.761	208.321	335.511	509.04	233.288	301.984	338.751
ENSG00000070759.17	25.5863	27.9799	37.5545	23.9905	31.171	25.7549	29.3656	39.2951
ENSG00000280670.3	60.6444	74.7402	48.1147	31.6696	62.7295	72.2967	46.4651	36.8979
ENSG00000132763.15	434.142	215.861	202.269	265.434	435.429	231.067	212.902	353.685
ENSG00000117450.15	13197.5	8902.07	7294.45	6845.21	10970.5	8754.71	10920.9	7455.01
ENSG00000117448.14	3144.16	3087.64	1805.24	2016.05	2557.34	2931.98	2658.83	1937.63
ENSG00000280836.1	0.962578	1.80021	1.80021	0.124944	0.226503	1.08817	1.08817	2.8115
ENSG00000132780.17	7831.67	3580.65	3082.86	5236.81	7245.96	3681.77	3505.7	5537.79
ENSG00000159588.15	63.1277	36.5005	87.4726	44.1082	48.1268	32.3579	70.2032	53.3831
ENSG00000159592.11	1721.4	1620.66	2412.09	2026.05	1600.35	1618.34	2408.08	2144.53
ENSG00000225447.1	11.8185	28.1776	15.5365	24.4596	16.8744	20.0763	15.2735	16.8744
ENSG00000234329.1	17.4608	6.78664	10.5988	13.6486	18.0193	15.0217	14.0225	14.0225
ENSG00000159596.7	857.48	484.765	374.043	460.594	817.503	469.933	439.836	563.136
ENSG00000197429.11	434.055	251.82	477.444	349.643	328.507	235.97	484.894	364.596
ENSG00000230896.1	30.374	32.8269	39.368	23.0152	27.9823	32.2661	38.2635	45.1176
ENSG00000086015.22	1991.44	1676.61	2396.58	1865.85	1783.74	1837.05	2737.5	1808.28
ENSG00000117461.15	662.192	1139.43	1663.16	571.472	634.509	1013.39	1309.59	562.291
ENSG00000226957.1	0.992764	2.58215	2.58215	0.198069	2.09116	0.246345	3.01357	1.16875
ENSG00000117472.10	5.70302	17.8991	21.1514	21.9645	5.57739	11.7279	28.422	9.97057
ENSG00000085998.14	2170.02	1509.67	2437.47	1518.75	1797.45	1504.83	2787.96	1470.77
ENSG00000171357.6	5.02086	4.1149	5.02086	0.491032	10.5499	4.87383	1.63034	4.87383
ENSG00000085999.13	765.401	261.844	274.297	391.041	710.838	299.347	341.375	455.733
ENSG00000132128.17	2910.29	2950.53	3353.82	2108.54	2491.75	2800.06	3673.61	2422.33
ENSG00000173660.12	5532.83	3649.8	3466.56	3845.31	4503.06	3028.02	4447.48	3926.63
ENSG00000117481.10	1100.09	772.232	958.46	938.116	914.835	688.547	925.964	1013.14
ENSG00000117480.16	47.5059	49.0414	39.8285	29.8479	32.2711	48.4921	34.1794	31.3169
ENSG00000197587.11	17.001	10.9171	42.858	20.8035	20.4946	12.9594	32.3355	14.0359
ENSG00000269956.2	6.77098	5.94659	7.59536	2.64907	8.66557	4.37269	9.52414	5.23126
ENSG00000079277.22	451.409	439.909	327.975	354.042	353.193	419.298	416.247	326.751
ENSG00000142961.15	147.434	242.269	221.194	199.242	134.868	221.266	295.921	175.131
ENSG00000123472.12	1357.34	999.885	693.383	907.097	1084.96	809.391	738.621	1075.31
ENSG00000186118.9	1.72455	0.96812	3.23741	0.211692	1.17219	1.17219	2.37134	1.17219
ENSG00000159658.15	1219.59	804.076	1923.57	1484.88	1181.65	974.921	1971.21	1737.16
ENSG00000186377.8	1.0717	0.249909	3.53706	1.0717	2.01409	1.15108	1.15108	4.60309
ENSG00000225506.2	2.66821	0.3719	5.72997	1.13734	2.25863	3.32762	4.39661	1.18964
ENSG00000162367.11	7.263	8.05592	1.71259	23.9142	4.62496	6.47467	3.7001	24.0469
ENSG00000123473.16	1447.74	561.683	905.561	972.448	1333.89	654.612	896.135	1263.14
ENSG00000162368.13	3412.32	1815.98	2808.44	1031.02	2440.2	1869.67	3380.32	1405.98
ENSG00000225762.1	3.98771	3.22326	10.1033	3.22326	6.46956	5.38848	7.55063	3.22633
ENSG00000186790.6	1.94279	1.01838	0.0939617	1.01838	1.05112	0.234581	3.50075	1.05112
ENSG00000237424.1	58.7482	28.8687	68.1838	21.0056	58.8773	27.6977	65.4912	24.8631
ENSG00000186564.6	17.2911	2.03764	13.4777	5.08832	13.4746	2.74605	10.256	8.1103
ENSG00000269113.4	0.306255	1.1326	12.7015	0.306255	1.78383	2.65255	16.5521	0.915104
ENSG00000132122.12	19.7808	43.7896	43.0152	18.2318	20.2601	35.028	42.9043	19.2755
ENSG00000235105.1	1	2	3	0	1	1	1	1
ENSG00000186094.17	1.4329	0.674351	9.01836	5.22563	4.4883	3.29393	4.4883	6.87706
ENSG00000162373.13	75.9082	95.8582	49.8197	49.8197	59.4245	85.0865	43.6325	48.5675
ENSG00000142700.12	44.8258	8.92884	15.039	76.1402	27.366	8.66947	20.0951	59.5656
ENSG00000284700.1	8.60437	0.344692	2.59733	4.84997	5.0748	0.442708	2.75875	2.75875
ENSG00000185104.20	2110.03	1204.42	978.012	1366.46	1850.8	1046.54	1237.94	1669.32
ENSG00000230585.2	3.474	0.990456	1.8183	0.162609	3.80577	0.323876	0.323876	2.9353
ENSG00000123080.12	1436.61	1023.13	1468.17	741.437	1268.21	981.231	1457.99	632.225
ENSG00000123091.5	2267.47	2310.76	2034.52	777.643	1762.59	2159.61	2744.3	1244.85
ENSG00000233406.5	0.882789	3.91772	0.124058	0.882789	2.41415	0.151662	1.28291	1.28291
ENSG00000236434.2	0.159664	1.94046	0.159664	1.05006	1.82558	1.01598	0.206385	3.44478
ENSG00000085831.16	140.759	170.113	89.5787	81.2995	101.409	139.935	91.2103	87.8109
ENSG00000085832.17	1949.29	1471.97	1440.67	1682.46	1540.28	1539.32	1514.42	1942.46
ENSG00000232027.2	2.51888	1.01009	4.02766	0.255695	1.18425	1.18425	2.43069	2.43069
ENSG00000238140.1	3.12562	1.36383	4.88741	4.00651	4.78332	1.51572	4.78332	7.23402
ENSG00000227070.1	1.00201	0.15572	1.84829	0.15572	1.83845	1.00815	2.66874	0.17786
ENSG00000227742.2	0.135175	1.04881	2.87608	0.135175	0.272224	1.90457	5.16927	0.272224
ENSG00000117859.19	2213.71	2441.27	1424.7	1175.25	2011.99	2516.85	1705.22	1317.68
ENSG00000078618.22	19373.8	5841.31	7556.35	12002.2	18511.8	7099.8	7963.52	14776.8
ENSG00000266993.3	79.4923	26.5771	38.7883	53.4417	73.2852	36.9022	21.8165	75.06
ENSG00000272175.1	1.08344	1.08344	0.193762	2.8628	4.39358	0.303599	2.75759	1.1216
ENSG00000230604.2	2.83763	5.07157	2.09298	4.32692	2.25353	3.43096	2.25353	3.43096
ENSG00000169213.7	2919.66	4907.35	3921.91	2902.87	2827.9	5089.62	4030.21	3416.77
ENSG00000117862.13	186.522	140.181	163.744	138.61	143.095	149.737	187.694	161.124
ENSG00000198841.4	142.87	127.826	103.589	122.812	99.0941	98.2338	142.972	138.67
ENSG00000223390.1	0.200819	0.954103	3.96724	1.70739	2.52835	1.23727	1.23727	1.23727
ENSG00000134717.18	1904.44	2056.33	1330.07	2078.74	1563.91	1568.25	1517.92	2524.58
ENSG00000157077.16	1020.14	808.373	928.296	788.639	922.216	903.526	931.561	821.756
ENSG00000228407.2	2.66894	0.340844	1.89291	2.66894	2.10515	2.10515	3.09289	1.11742
ENSG00000224255.2	0.0477247	5.319	0.800764	0.800764	0.314836	1.5252	2.73556	0.314836
ENSG00000154222.15	1144.19	672.395	999.456	673.195	893.58	669.316	1230.89	749.541
ENSG00000272100.1	5.08715	0.421761	2.75445	1.97689	4.15792	2.19795	4.15792	1.21796
ENSG00000287078.1	1.68687	1.68687	6.73186	5.89103	2.49609	4.95638	9.87694	9.05685
ENSG00000224680.4	6.99856	9.51792	7.83835	4.4792	7.16359	6.31317	12.2661	7.16359
ENSG00000085840.13	1669.55	408.084	417.623	1042.39	1666.15	481.572	553.421	1293.09
ENSG00000134748.13	2076.5	945.229	1568.62	1698.36	1804.34	880.412	1590.56	1914.96
ENSG00000134744.14	1667.02	959.735	1189.68	1430.73	1525.27	1060.24	992.75	1589.06
ENSG00000116157.6	718.683	894.284	455.664	245.555	585.701	785.291	553.475	307.106
ENSG00000182183.15	0.199623	1.03875	1.87787	0.199623	1.82835	0.190445	2.64731	1.82835
ENSG00000162377.6	1962.49	926.035	1002.26	1582.17	1548.94	932.069	1164.23	1936.5
ENSG00000162378.13	1156.7	977.448	1531.58	961.082	966.371	981.889	1430.94	1237.93
ENSG00000228929.1	4.71234	3.94803	2.41943	7.00525	3.12308	5.28668	5.28668	5.28668
ENSG00000206627.1	0.295357	3.50236	1.09711	1.89886	1.16102	2.95269	3.84852	1.16102
ENSG00000203995.10	8.94017	2.80578	5.10618	14.3078	9.76847	3.47038	7.6691	10.8181
ENSG00000121310.17	250.181	79.2956	61.1485	264.548	197.494	74.2642	56.9687	168.308
ENSG00000230953.2	1.01379	0.179208	1.01379	1.84838	1.88439	1.88439	0.19563	1.88439
ENSG00000116171.19	1882.54	1605.69	1907.64	1334.16	1374.64	1431.68	1850.28	1365.94
ENSG00000174348.14	4.19447	27.0465	37.5935	7.71016	7.58824	43.1881	55.6067	6.76033
ENSG00000162383.13	0.0317832	1.56217	4.62296	0.0317832	0.342528	0.342528	3.44117	0.342528
ENSG00000157184.7	247.14	148.439	291.863	193.934	238.218	132.122	239.209	215.412
ENSG00000236723.2	5.34824	1.60439	0.855626	0.855626	0.359665	0.359665	1.52996	2.70025
ENSG00000162384.14	730.62	552.365	763.394	695.449	646.895	534.589	800.531	631.622
ENSG00000162385.11	1282.69	1091.14	1110.63	1029.27	1035.74	933.097	1336.93	882.618
ENSG00000226754.2	5.01908	5.84909	9.1691	5.01908	7.07489	3.59819	9.68242	5.33654
ENSG00000157193.18	578.944	208.61	490.506	172.287	528.554	320.346	589.242	200.837
ENSG00000232762.1	3.48792	0.191256	1.83959	0.191256	4.636	1.16368	2.03176	0.295596
ENSG00000174332.5	20.2749	118.884	146.276	24.9705	15.1955	89.3693	143.573	27.5578
ENSG00000058804.12	1405.26	504.139	532.397	661.913	1338.72	591.521	601.003	975.55
ENSG00000058799.15	246.451	210.599	280.595	242.182	189.724	189.724	283.661	267.582
ENSG00000211452.11	3.27365	0.922264	0.922264	2.48985	0.35561	0.35561	3.09413	1.26845
ENSG00000081870.12	681.111	370.202	439.381	563.427	584.71	344.371	464.08	662.061
ENSG00000116212.15	787.564	714.832	484.386	390.218	611.151	710.367	682.629	462.862
ENSG00000219102.3	9.65916	1.31559	3.59111	3.59111	6.93672	2.49545	3.60577	2.49545
ENSG00000116209.12	1049.36	1372.13	1762.04	854.4	821.706	1225.81	1868.1	900.208
ENSG00000280378.1	0.274792	1.03647	3.32152	1.03647	2.15773	1.04818	2.15773	2.15773
ENSG00000116205.14	227.874	140.736	197.029	162.328	192.698	119.861	188.814	169.39
ENSG00000215883.10	213.083	97.1484	77.1597	143.522	215.022	99.6023	95.9671	182.305
ENSG00000116221.15	2267.11	1402.35	1207.69	1528.77	2077.07	1251.72	1636.16	1750.1
ENSG00000157216.16	722.67	1056.98	891.438	741.242	719.526	914.768	1029.77	609.869
ENSG00000198711.5	17.7838	27.82	30.9081	17.0118	11.8295	24.4142	23.5153	9.13272
ENSG00000162390.18	115.783	63.9236	53.2467	55.5346	94.543	55.1144	57.1896	47.8513
ENSG00000162391.12	3.10954	1.47951	4.73957	3.10954	3.91361	3.91361	3.07717	6.42294
ENSG00000243725.7	24.2376	16.9653	25.0456	12.9252	17.8282	19.6211	29.4823	14.2424
ENSG00000162396.6	208.8	137.916	144.703	132.638	164.144	130.223	164.144	142.338
ENSG00000116133.13	11735.9	5590.55	6207.13	5752.93	11722.5	7032.04	8701.16	6436.8
ENSG00000233203.6	1.28347	4.00761	1.28347	2.19152	6.89345	3.70832	2.11576	2.11576
ENSG00000169174.11	4202.02	4754.6	2357.79	3174.69	4342.72	5936.5	4034.05	2254.39
ENSG00000162402.14	2840.27	1547.27	1884.85	2462.09	2727.33	1789.02	2044.59	2934.52
ENSG00000162407.9	7.07603	37.8412	19.3821	6.3069	8.69139	26.1933	27.2228	9.72091
ENSG00000162409.11	4.60129	0.182701	0.182701	0.182701	2.01092	0.360483	0.360483	7.78743
ENSG00000173406.16	2638.85	585.524	698.744	2338.82	2635.96	762.602	849.257	2982.58
ENSG00000227935.1	4.20755	0.36842	1.90407	4.97538	3.34887	1.30105	1.30105	4.37277
ENSG00000226759.8	3.78467	0.0360077	0.0360077	1.53547	1.52495	0.233607	0.233607	1.52495
ENSG00000162600.12	146.641	92.9285	133.408	134.186	115.15	96.5741	99.3605	148.586
ENSG00000286918.1	3.5337	1.17918	2.74886	1.96402	3.08259	2.13266	1.18273	3.08259
ENSG00000184292.7	0.790596	3.00809	0.0514305	2.26893	0.336282	0.336282	0.336282	1.5407
ENSG00000185839.3	3.64496	3.64496	2.89746	6.63495	2.37001	2.37001	4.51842	3.44422
ENSG00000162601.11	1295.71	827.583	1045.71	1060.42	1165.31	951.767	882.058	1376.2
ENSG00000177606.8	1616.2	3820.72	1989.63	2735.69	1385.1	3520.65	3350.6	2981.56
ENSG00000234807.7	1.81788	5.59508	1.81788	1.06244	1.26996	2.42201	3.57407	1.26996
ENSG00000232453.7	2.06393	9.65993	3.75193	1.21993	1.75038	2.60652	12.8802	2.60652
ENSG00000237352.4	3.63843	9.85488	5.19254	2.86137	0.870303	7.43033	5.55604	1.80745
ENSG00000224609.8	5.64135	4.84778	6.43492	8.02206	3.62021	3.62021	6.24673	7.12224
ENSG00000172456.18	40.4558	69.914	60.6114	44.3319	29.5712	56.3069	53.4424	55.352
ENSG00000134709.12	10416.3	2225.9	1680.74	8308.64	9839.34	2975.08	2096.37	11732.8
ENSG00000134716.11	54.4912	20.7828	19.9803	44.8602	39.5613	26.8968	12.423	57.6536
ENSG00000162599.17	1236.42	1330.31	960.079	589.086	1237.86	900.37	623.431	728.648
ENSG00000237928.6	0.339742	3.56904	11.6423	0.339742	0.864118	3.55429	13.4182	1.76084
ENSG00000237853.6	1.69118	0.928478	1.69118	0.928478	1.12471	1.12471	0.215324	1.12471
ENSG00000162604.12	494.263	456.969	387.82	650.432	413.042	388.989	464.996	611.239
ENSG00000271200.1	5.08673	1.93431	0.358101	1.14621	0.293229	3.08936	4.0214	4.0214
ENSG00000132849.21	392.718	592.117	316.204	331.661	274.364	513.903	286.971	390.739
ENSG00000132854.19	5.8353	6.62726	9.00316	1.87547	8.96036	8.96036	6.19679	3.43321
ENSG00000162607.13	3838.96	1496.13	2053.02	2210.04	3099.94	1527.88	2125.66	3007.82
ENSG00000116641.18	2324.4	1589.6	2109.23	1432.41	2115.23	1751.07	2127.33	1726.87
ENSG00000132855.5	3.17362	0.170004	3.92452	0.920907	1.38342	0.220018	1.38342	2.54682
ENSG00000235545.1	10.1465	9.38487	28.4247	4.05372	10.4915	7.19893	21.4667	10.4915
ENSG00000125703.15	550.133	211.983	306.916	427.74	471.209	214.875	265.953	479.722
ENSG00000230798.5	100.119	104.023	79.8179	117.298	74.8953	70.5225	80.1426	114.25
ENSG00000187140.6	106.327	38.1601	32.7377	75.3422	95.7507	51.9172	39.9627	79.8112
ENSG00000088035.18	928.296	388.374	404.855	616.742	775.604	399.918	417.989	808.892
ENSG00000142856.17	939.265	441.738	528.507	782.445	820.129	399.467	494.781	892.53
ENSG00000203965.13	290.658	247.129	311.645	218.369	307.03	216.404	251.112	256.896
ENSG00000251720.1	3	2	5	2	1	1	1	1
ENSG00000116652.6	12.8542	4.35724	14.3991	3.58479	9.81246	4.81649	4.81649	13.8092
ENSG00000079739.17	800.282	625.747	748.093	743.815	606.202	616.278	890.827	600.325
ENSG00000244256.3	1.13003	0.284383	1.97568	2.82134	1.15239	1.15239	3.64529	3.64529
ENSG00000185483.12	321.091	369.588	694.606	199.422	263.8	374.421	895.191	255.291
ENSG00000223949.8	5.21182	10.8479	51.9111	6.01698	14.4963	10.8981	58.5749	9.09893
ENSG00000177414.13	0.768912	0.0268482	3.73717	1.51098	0.349134	0.349134	1.64256	0.349134
ENSG00000158966.16	2652.93	1332.63	3310.8	1818.65	2443.63	1303.5	2369.32	2112.01
ENSG00000162437.14	1822.31	776.145	663.746	895.617	1680.94	822.817	616.336	1231.99
ENSG00000162434.13	15257.2	7167.58	9376.72	14571	14506.4	8531.3	9773.32	15690.8
ENSG00000226891.9	21.4034	9.33663	14.9678	13.3589	20.9433	12.87	6.59079	14.6641
ENSG00000185031.6	3.34915	0.115298	0.115298	0.115298	3.76339	0.213776	0.213776	1.98858
ENSG00000272506.1	1.86169	1.0607	1.86169	3.46366	3.02746	2.12322	0.314743	2.12322
ENSG00000212257.1	1.68894	0.085984	0.085984	2.49041	0.219824	1.12772	0.219824	2.94352
ENSG00000265996.1	4.3881	3.5713	3.5713	1.93771	4.90976	1.48568	1.48568	2.3417
ENSG00000162433.15	294.105	473.66	369.707	185.857	259.822	492.713	589.89	235.528
ENSG00000116675.16	22.4516	103.985	23.99	17.8365	28.742	81.3473	50.403	18.4273
ENSG00000213625.9	979.106	1619.13	1173.53	932.445	845.179	1471.4	1211.53	1153.89
ENSG00000116678.20	32.9567	82.0965	101.118	38.5048	34.3324	83.4272	98.2483	34.3324
ENSG00000184588.18	389.146	419.163	936.962	709.331	474.812	518.495	1186.58	739.478
ENSG00000118473.22	14.0934	103.668	11.8161	17.889	24.8455	68.2542	14.5645	33.9842
ENSG00000152763.17	15.3249	51.965	13.7983	8.45493	17.4202	40.2372	18.5067	15.2472
ENSG00000198160.15	918.169	740.788	784.557	669.375	823.601	704.555	816.291	847.619
ENSG00000116704.8	327.895	237.272	709.633	568.486	350.04	268.423	772.635	564.965
ENSG00000081985.13	37.6635	11.3201	13.7898	29.4312	40.6577	9.15426	15.2799	36.2822
ENSG00000142864.15	16573.5	7738.04	8398.92	10906.6	14505.3	7410.61	10665.7	11572.3
ENSG00000223263.1	2.12606	2.12606	3.07266	4.01925	4.63212	1.41322	3.02267	5.43685
ENSG00000116717.13	1285.4	2164.98	2348.41	1803.48	1133.14	1635.33	3077.06	2184.92
ENSG00000172380.6	3490.61	2510.43	2438.43	2942.4	2931.64	2448.7	3132.11	4148.52
ENSG00000232284.7	34.0467	31.7519	28.6922	33.2817	28.5531	22.9017	31.7824	23.7091
ENSG00000162595.7	16.0344	20.6512	30.6543	28.3459	11.3757	16.0272	24.4	25.3303
ENSG00000228431.1	0.212485	0.984958	1.75743	1.75743	2.08063	1.07204	1.07204	1.07204
ENSG00000116729.14	3658.01	2694.61	3666.35	3211.08	3034.12	2635.27	4751.25	3326.07
ENSG00000234383.1	6.85539	10.0691	13.2828	10.0691	14.4858	8.39271	12.7449	11.8745
ENSG00000116745.7	8.21876	10.6525	43.102	1.72886	5.90625	23.6952	47.7104	3.2379
ENSG00000024526.17	2669.84	931.63	1738.24	1538.55	2309.9	916.835	1593.49	2226.62
ENSG00000233589.1	6.84106	2.70089	11.8093	8.49712	8.2159	4.74187	15.164	5.61038
ENSG00000234264.1	7.9645	10.2666	21.0097	9.49922	15.4894	11.3563	18.5893	12.3895
ENSG00000285041.1	2.6293	1.00939	2.6293	1.00939	0.306991	2.08521	1.1961	2.97431
ENSG00000033122.21	40.5965	35.9498	35.9498	45.2431	27.2267	30.5174	35.4535	53.5525
ENSG00000066557.6	1352.38	839.015	1095.31	651.066	1211.31	826.993	1232.01	807.284
ENSG00000116754.13	6179.46	5215.81	5287.73	4557.47	4787.69	4157.46	4720.69	5052.55
ENSG00000118454.13	972.941	835.847	1297.76	857.658	816.089	795.881	1198.12	1015.28
ENSG00000197568.14	107.565	189.086	108.397	158.308	103.529	160.75	106.997	214.502
ENSG00000226088.1	2.42681	2.42681	2.42681	1.60828	3.53836	4.95599	2.82954	4.24718
ENSG00000116761.12	659.337	493.629	395.188	779.927	478.451	482.848	468.777	904.971
ENSG00000271992.1	15.8809	23.3155	8.44629	24.1416	13.3261	13.3261	20.2892	32.4746
ENSG00000229051.2	4.81613	0.267502	1.02561	5.57423	1.42411	1.42411	1.42411	4.70535
ENSG00000050628.20	3884.37	649.094	822.066	2219.03	3182.2	757.13	931.688	2548.07
ENSG00000235782.1	7.03728	1.99579	1.99579	7.87753	2.68426	0.964517	2.68426	11.283
ENSG00000269933.1	20.2196	9.89663	5.1322	8.30849	18.2273	3.60208	3.60208	11.8288
ENSG00000235079.1	5.1728	1.9649	2.76687	1.9649	4.07478	0.464677	2.26973	4.07478
ENSG00000132485.14	3164.09	1648.54	2782.49	2113.91	2609.85	1571.4	2608.87	2753.56
ENSG00000207721.1	6.99954	11.5741	6.99954	10.0492	6.45029	7.46173	7.46173	10.496
ENSG00000229956.11	7.03192	4.06087	7.03192	5.5464	4.4498	5.46159	5.46159	3.43801
ENSG00000172260.15	466.289	290.252	309.812	209.004	356.419	290.643	220.168	277.722
ENSG00000233994.2	1.92991	1.92991	3.41418	3.41418	2.26981	1.21522	2.26981	2.26981
ENSG00000286863.1	59.8147	8.8863	8.8863	22.7759	46.5466	12.3346	6.29715	29.4406
ENSG00000225087.2	17.9842	2.53118	0.904549	13.9176	22.1474	2.60725	1.71907	13.2655
ENSG00000212366.1	8.56029	0.15416	0.15416	1.68255	4.72912	0.441059	0.441059	4.72912
ENSG00000227016.3	3.3714	0.177837	0.177837	3.3714	3.0727	0.329672	0.329672	3.98704
ENSG00000162620.16	6.21788	2.44876	11.4946	6.9717	2.54735	4.73838	5.83389	8.02491
ENSG00000254685.7	149.647	90.6505	144.352	105.021	134.493	98.5604	124.061	114.788
ENSG00000259030.8	1.75644	2.51534	0.238661	1.75644	1.13769	1.13769	1.13769	2.24972
ENSG00000116791.14	1431.29	827.999	1037.04	718.099	1268.64	784.631	1087.65	898.394
ENSG00000162623.16	1047.33	495.519	665.733	667.316	882.524	445.351	665.798	935.543
ENSG00000137968.16	6.87765	43.5443	28.5443	10.211	11.9912	49.5363	49.5363	13.6978
ENSG00000117054.15	1108.95	860.168	1250.46	720.179	910.288	776.507	1146.25	830.231
ENSG00000137955.16	2232.81	1277.86	1302.77	1307.3	1633.65	1112.2	1335.84	1618.59
ENSG00000057468.7	8.60874	5.907	7.70816	11.3105	14.0862	6.60229	3.27611	8.26538
ENSG00000184005.11	4.08184	22.1741	8.01495	1.72198	2.44671	21.337	8.11379	5.28025
ENSG00000226415.1	33.3431	18.3212	40.4587	34.9243	29.2365	22.7055	44.1646	32.9685
ENSG00000142892.15	1086.75	941.064	999.162	1092.12	879.677	853.191	937.615	1228.13
ENSG00000226084.5	30.7428	27.5571	14.8143	26.7607	35.8403	24.4245	24.4245	34.9621
ENSG00000287870.1	0.904221	3.75385	3.75385	3.04144	0.836539	1.86881	0.836539	0.836539
ENSG00000154027.19	54.8424	221.874	102.21	47.3633	44.0409	271.268	109.954	57.9174
ENSG00000036549.13	1486.59	1139.51	1289.26	1165.25	1341.15	1182.75	1260.02	1467.68
ENSG00000077254.14	2814.2	1717.46	1530.45	3169.44	2567.63	1831.49	1554.88	3689.97
ENSG00000180488.15	635.726	427.682	690.308	479.891	518.236	449.306	647.712	699.875
ENSG00000219201.4	6.68313	2.88607	12.7584	8.20195	8.78243	6.49383	9.92672	5.34953
ENSG00000235613.2	0.472713	29.8114	1.97726	5.73864	0.82381	10.2316	11.5756	10.2316
ENSG00000235927.4	2.32955	4.79922	5.62244	7.26889	5.18127	8.68579	4.30514	2.55287
ENSG00000162614.19	94.5444	770.199	99.8705	89.9792	102.589	527.052	134.644	199.862
ENSG00000162613.17	3716.08	1917.65	3812.44	2074.13	3617.08	2052.3	3416.39	2676.79
ENSG00000162616.9	766.804	889.271	1196.95	550.597	667.506	726.471	1010.17	689.757
ENSG00000137960.6	0.986962	4.77883	2.50371	0.228588	1.2836	1.2836	3.53595	1.2836
ENSG00000273338.1	4.73374	2.47574	14.5184	9.24976	9.56884	3.76371	3.76371	7.24679
ENSG00000285928.1	9.47498	7.10079	18.9717	3.14381	17.9717	11.4704	12.3992	3.11169
ENSG00000122420.10	170.739	381.329	338.111	192.741	114.829	370.517	262.663	210.596
ENSG00000137959.17	136.635	523.33	255.873	58.7996	131.018	649.84	293.53	90.1726
ENSG00000137965.11	554.441	616.847	552.861	241.621	440.113	649.333	542.398	252.279
ENSG00000162618.15	0.279352	0.279352	3.61948	0.279352	0.27398	2.76356	5.25315	1.9337
ENSG00000117114.20	10.8754	18.7931	70.2584	44.1298	18.9264	31.0088	76.5505	35.656
ENSG00000233008.6	1.65548	3.97376	0.882718	0.109957	1.27872	3.2449	0.295629	0.295629
ENSG00000137941.17	1270.11	992.976	1544.14	1128.43	870.078	877.409	1361.25	1245.79
ENSG00000233061.1	0.940937	0.940937	4.03316	0.940937	1.24014	0.249884	3.22064	1.24014
ENSG00000271576.1	61.0754	51.1175	63.3733	43.4576	61.7944	45.5091	49.5804	52.6339
ENSG00000142875.19	1548.56	1199.18	1950.68	1133.25	1363.14	1184.36	2217.82	1479.13
ENSG00000203943.9	16.7171	12.4133	37.3755	8.97026	4.69468	22.3969	49.3718	16.4962
ENSG00000240520.7	1.14967	2.00036	6.25381	1.14967	0.569341	3.96077	8.20005	1.4172
ENSG00000137976.8	1.76528	0.130754	2.58254	1.76528	2.0572	0.296	2.9378	0.296
ENSG00000117133.11	1432.86	893.438	961.062	1060.14	1164.17	789.543	1272.02	1196.33
ENSG00000174021.11	86.1966	133.809	137.618	68.1038	99.329	120.259	237.789	85.644
ENSG00000285851.1	4.36914	5.3874	4.36914	8.44219	6.83596	10.7883	2.09313	12.3693
ENSG00000122432.18	4.00291	12.5849	11.0245	7.9038	5.4821	11.2907	12.2588	9.35449
ENSG00000117151.13	69.3885	56.6063	55.8544	54.3506	53.6539	61.9858	52.6124	51.5709
ENSG00000284882.1	10.2767	3.88189	10.2767	4.68124	8.0909	5.43958	12.5098	11.626
ENSG00000117155.17	1636.62	733.446	1100.77	924.486	1450.56	738.397	1053.6	1249.62
ENSG00000171517.6	1.20145	1.20145	3.60826	7.61961	0.595957	1.50234	6.94062	6.03424
ENSG00000153898.13	57.9472	34.8737	24.5304	45.217	44.5046	28.0278	24.3663	57.3199
ENSG00000162643.13	81.8172	106.206	445.905	197.663	93.5949	182.048	661.032	208.751
ENSG00000055732.13	126.784	313.896	265.195	349.78	112.852	429.231	353.502	351.819
ENSG00000280099.1	55.2317	134.95	52.1948	54.4725	41.8073	93.6411	42.8872	77.443
ENSG00000097096.9	209.621	184.234	217.237	179.157	191.382	193.087	153.872	228.04
ENSG00000162642.14	640.172	626.234	497.864	508.868	517.324	454.731	539.679	501.676
ENSG00000223254.1	2.4069	1.69439	1.69439	2.4069	1.39003	1.39003	1.39003	0.576005
ENSG00000142867.14	353.347	760.767	720.902	455.401	273.69	676.267	751.293	547.259
ENSG00000223653.6	14.4777	129.912	32.4675	33.217	8.07551	60.1046	49.9526	30.9176
ENSG00000153904.21	2506.98	5032.13	4986.62	3512.32	2099.01	4204.94	5567.4	4338.34
ENSG00000199459.1	0.0546452	4.58601	0.0546452	1.5651	0.274667	0.274667	2.60587	1.44027
ENSG00000273264.1	2.30343	28.4219	34.5674	2.30343	2.39618	25.8923	24.8707	5.46089
ENSG00000282057.1	12.9145	94.2447	30.286	12.1249	18.0023	93.7033	47.9089	21.7406
ENSG00000272691.1	0.193986	0.193986	8.04743	0.193986	1.40101	1.40101	8.03099	1.40101
ENSG00000142871.18	1168.26	9663.39	3561	2811.47	1051.51	7940.69	4963.11	3625.53
ENSG00000117174.11	1412.23	1133.94	1157.9	1128.52	1267.87	1062.14	1178.99	1295.84
ENSG00000171502.15	8.32475	8.32475	8.32475	5.81954	8.12861	3.09476	8.12861	6.45066
ENSG00000285210.1	0.207803	10.9465	0.97485	2.50894	0.654048	7.90781	3.7628	0.654048
ENSG00000122417.15	650.667	554.988	1060.83	579.3	558.112	546.676	949.793	858.305
ENSG00000137975.8	1.04657	1.04657	0.23448	4.29491	1.20172	0.318363	2.96843	4.73514
ENSG00000016490.16	3.71184	0.378388	1.21175	7.87866	5.00624	1.55853	0.696601	10.1778
ENSG00000261737.1	5.7218	19.4027	24.533	13.4173	8.14131	13.2439	34.5047	8.99175
ENSG00000097033.14	1735.57	1906.11	2561.6	1307.2	1474.06	1893.43	2755.47	1578.9
ENSG00000183291.17	3814.57	3903.78	4245.4	4169.37	3052.8	3387.25	4769.02	4300.3
ENSG00000153936.17	1550.57	1225.72	1230.43	1144.11	1211.24	1069.89	1195.33	1491.13
ENSG00000267272.5	4.31344	3.52723	17.679	4.31344	4.75924	3.81625	15.1321	13.2461
ENSG00000143013.13	707.821	1121.57	2369.8	986.499	658.964	1050.36	2092.78	997.652
ENSG00000227290.2	0.885791	0.107572	3.99867	0.107572	0.231358	0.231358	3.16435	2.18668
ENSG00000237505.8	5.00037	8.77189	13.4863	9.71477	2.74234	5.20526	19.9828	10.9521
ENSG00000279778.1	1.33755	4.36011	5.11576	6.62704	1.43139	4.54953	4.54953	2.47077
ENSG00000065243.20	2207.92	1397.66	1981.63	1945.94	1986.55	1488.17	1802	2421.62
ENSG00000207234.1	4.9692	6.69593	5.83257	9.28602	6.27777	2.89492	6.27777	10.5063
ENSG00000241975.1	4.52468	1.53249	14.2493	6.02077	3.57563	6.69929	6.69929	5.13746
ENSG00000137947.12	755.42	669.283	790.387	711.072	605.238	538.914	786.801	747.007
ENSG00000235308.1	5.87262	1.24598	2.78819	1.24598	2.20516	5.25885	3.22306	2.20516
ENSG00000137944.18	884.189	450.681	619.971	839.889	678.887	412.209	535.926	919.906
ENSG00000213516.10	785.768	387.536	669.099	441.204	734.462	368.496	628.088	531.473
ENSG00000117226.12	237.491	281.013	314.247	139.37	183.838	323.511	294.645	185.7
ENSG00000117228.11	459.206	519.844	235.841	274.988	378.898	482.767	251.375	314.108
ENSG00000234518.2	29.2875	15.0904	23.7664	26.1326	18.251	16.3917	25.6883	29.4069
ENSG00000162645.13	316.374	228.506	209.507	311.624	294.552	183.103	298.267	282.478
ENSG00000162654.9	71.2924	8.46757	33.5975	89.3546	65.88	18.6318	19.5767	86.6692
ENSG00000154451.14	2.77111	1.12358	0.299811	4.41864	2.14743	0.408055	3.01711	5.62617
ENSG00000183347.15	3.85891	0.0787919	0.0787919	2.34687	2.50475	0.262625	0.262625	1.38369
ENSG00000225492.6	11.5774	2.52583	7.46303	7.46303	10.0008	2.98798	3.86459	12.6306
ENSG00000286548.1	7.56575	3.05446	6.06199	3.80634	2.40335	3.46177	4.52019	5.5786
ENSG00000197147.15	561.413	422.6	484.639	371.417	530.431	380.229	413.607	481.345
ENSG00000231999.7	42.9054	35.3153	93.0002	40.6284	38.8193	43.2386	71.9646	38.8193
ENSG00000171488.15	713.186	686.361	1940.99	790.594	727.992	790.923	1601.68	961.885
ENSG00000231613.1	0.820068	3.06083	8.28927	0.820068	0.695878	0.695878	4.2461	0.695878
ENSG00000272931.1	13.7936	12.3805	10.2608	15.9133	10.7648	7.96913	9.8329	8.90101
ENSG00000171492.14	1626.05	1683.07	1865.54	1495.72	1417.2	1615.91	1892.34	1630.04
ENSG00000272672.1	0.174892	0.939521	2.46878	0.174892	1.07648	1.07648	1.07648	2.13957
ENSG00000228175.3	69.4996	32.2433	47.6318	46.8219	65.8104	22.1519	54.2276	46.2086
ENSG00000162664.17	2104.38	1501.91	1487.99	1544.45	1853.72	1283.83	1684.53	1652.87
ENSG00000287406.1	6.92651	0.347775	0.347775	3.63715	9.30565	1.45675	1.45675	3.20095
ENSG00000287372.1	4.93002	0.173047	1.75871	0.965876	4.99897	0.365514	1.29221	1.29221
ENSG00000229201.1	3.20497	0.0604705	0.846596	1.63272	3.07901	0.299897	0.299897	0.299897
ENSG00000199666.2	5.03904	0.175553	2.12095	3.09364	10.3353	0.626228	1.43531	3.05349
ENSG00000143032.8	2460.1	560.187	698.633	1046.7	2326	661.036	1038.39	1357.17
ENSG00000287076.1	64.7889	36.3945	67.2227	20.9804	30.851	31.7392	85.0308	27.2982
ENSG00000233593.10	49.106	63.5979	82.1154	32.1988	42.79	72.535	82.45	33.7763
ENSG00000285532.2	4.3413	1.81644	2.65806	1.81644	0.538237	2.23849	0.538237	4.78887
ENSG00000232882.1	3.49117	1.85665	1.03938	1.85665	2.9975	2.9975	0.3557	1.2363
ENSG00000122482.21	1962.42	1243.23	1106.58	1785.82	1724.51	1383.41	1159.97	2113.95
ENSG00000162669.16	6.91124	16.0326	12.232	6.91124	8.96548	13.0229	5.92244	5.92244
ENSG00000097046.13	960.62	426.597	634.272	799.007	876.546	476.594	593.207	853.417
ENSG00000069702.11	126.62	340.222	574.645	179.828	156.986	441.54	428.328	229.14
ENSG00000172031.7	14.3713	42.1133	21.9373	16.0526	9.44302	38.4012	46.9183	22.2187
ENSG00000230667.6	1.69455	1.69455	2.4781	1.69455	0.446557	1.25709	2.06763	0.446557
ENSG00000189195.15	40.351	55.473	140.156	60.7657	45.2851	69.0401	97.3199	43.0227
ENSG00000273487.1	0.0656336	1.53954	3.01345	1.53954	0.336048	0.336048	1.48401	0.336048
ENSG00000203910.9	1.0873	3.80885	3.80885	1.0873	2.18653	2.18653	0.535158	7.14066
ENSG00000174842.17	684.05	471.659	493.128	453.257	526.52	408.148	480.6	596.932
ENSG00000122484.9	846.552	824.975	744.618	558.608	689.915	707.695	677.468	737.923
ENSG00000162676.12	18.5444	13.5574	20.2068	12.7262	7.88546	13.037	21.6229	15.6128
ENSG00000067208.14	678.989	670.028	581.159	465.405	603.634	579.388	572.257	522.34
ENSG00000223787.2	1.73704	0.118357	0.118357	2.54638	0.223075	2.01009	2.9036	0.223075
ENSG00000122406.14	24365.4	17866.9	20740.9	22713.7	18601.6	15391.1	23628.6	22973.1
ENSG00000154511.12	604.003	425.021	475.619	315.517	515.025	389.485	392.731	335.372
ENSG00000207523.1	12.9021	4.41917	8.66065	9.50894	10.1214	4.99535	5.84969	16.1018
ENSG00000229052.2	3.48985	4.27365	1.92226	1.92226	4.09413	2.26845	1.35561	1.35561
ENSG00000143033.18	1343.64	887.319	1039.16	1319.12	1035.81	729.989	981.842	1364.12
ENSG00000117500.13	2178	2172.69	1895.36	1154.29	1941.48	2021.33	1962.93	1548.22
ENSG00000122483.17	587.066	335.051	331.911	590.991	540.958	326.745	358.972	601.621
ENSG00000223745.8	156.593	182.857	222.252	182.084	124.848	152.329	158.534	201.971
ENSG00000229567.1	0.573101	3.07987	1.40869	2.24428	5.10695	2.80116	2.03256	5.10695
ENSG00000117505.13	2281.01	1528.09	1133.78	1978.38	1944.27	1546.45	1552.62	2696.69
ENSG00000229635.1	2.66701	1.12023	1.89362	1.89362	1.09506	2.08919	2.08919	2.08919
ENSG00000137942.18	1438.49	1154.12	1813.49	720.528	1384.79	1267.11	1818.82	901.56
ENSG00000137936.18	48.8383	245.551	234.821	79.2394	62.8846	278.041	419.005	72.7768
ENSG00000224093.5	0.102604	1.61281	4.63321	0.102604	1.38715	1.38715	2.59949	0.174803
ENSG00000260464.1	3.20567	1.27505	3.20567	4.17099	2.27668	6.23569	7.02749	2.27668
ENSG00000067334.14	2498.19	1562.9	1787.56	1883.5	1977.48	1357.85	2069.71	2125.43
ENSG00000023909.10	1161.67	846.297	694.675	567.312	932.688	748.671	858.839	949.637
ENSG00000198691.13	22.6585	226.353	450.416	31.2763	38.0655	279.636	389.441	35.201
ENSG00000137962.13	171.534	1133.48	1293.14	417.354	180.96	1241.58	1156.7	447.748
ENSG00000226835.3	0.275477	3.46713	1.8713	1.8713	0.274108	3.01746	3.01746	2.10301
ENSG00000236098.1	0.316567	7.97978	4.57391	2.0195	0.80907	11.0219	5.06443	0.80907
ENSG00000117528.14	1865.23	1178.16	1115.06	1442.24	1637.18	1203.01	1273.1	1739.39
ENSG00000117525.14	262.58	1028.24	373.802	344.787	222.186	1069.03	689.565	385.455
ENSG00000224081.9	0.275049	4.09213	5.61896	1.80188	1.42739	0.402395	4.50236	2.45238
ENSG00000143036.17	1.76013	21.278	4.88298	6.44441	3.20833	19.6309	6.10643	7.07247
ENSG00000117519.16	5718.59	9762.88	10482.1	5235.19	5194.53	9273.49	10324.2	6431.39
ENSG00000235501.6	61.2846	81.1496	126.228	59.7565	44.8648	82.5013	92.9558	84.5922
ENSG00000172339.10	276.862	181.564	148.285	110.469	221.068	146.874	167.741	137.6
ENSG00000152078.10	3.26353	4.82153	4.04253	14.1695	3.68027	7.57398	3.68027	12.4411
ENSG00000271092.5	5.10497	8.96702	11.2842	8.96702	6.7062	5.79001	10.371	3.95763
ENSG00000122481.17	36.6399	41.1425	35.8894	21.6311	28.8643	35.4836	31.0707	23.3482
ENSG00000228852.6	6.94026	3.77629	8.52225	3.77629	7.23503	1.86942	6.34076	1.86942
ENSG00000228502.1	22.816	11.1222	14.2406	13.461	16.7321	7.2108	14.8279	17.6843
ENSG00000137970.7	71.0144	75.8425	54.9208	56.5301	52.0055	52.8965	60.0247	79.6274
ENSG00000117569.19	621.075	521.284	1868.84	547.585	581.419	528.742	1609.13	645.03
ENSG00000188641.14	498.954	698.731	1055.26	651.092	443.02	687.946	886.508	677.867
ENSG00000232878.3	1.55825	3.74651	1.55825	0.828833	0.453544	0.453544	1.56862	0.453544
ENSG00000228057.1	5.29173	6.87406	7.66522	10.0387	9.1088	6.31624	9.1088	5.38538
ENSG00000270911.1	0.201115	0.995269	2.58358	0.995269	0.171155	2.00331	2.00331	2.00331
ENSG00000225206.10	50.7727	87.916	308.454	61.6062	38.5947	122.275	255.764	81.4309
ENSG00000259946.1	1.60917	9.17248	24.2991	4.63449	1.0258	12.4123	12.4123	5.58038
ENSG00000285922.1	5.73103	12.8789	70.062	7.31945	11.0299	23.9497	72.8603	11.0299
ENSG00000226053.1	8.59738	29.0012	69.0242	17.2298	7.85756	27.7255	63.6771	14.4802
ENSG00000162627.17	82.5438	219.532	301.725	77.709	73.225	214.552	332.474	93.0288
ENSG00000117598.13	0.98273	1.88387	3.68615	0.0815887	1.22426	0.395134	6.19899	0.395134
ENSG00000227034.1	3.41286	1.05937	0.274875	1.05937	1.11248	2.98373	2.98373	1.11248
ENSG00000156869.14	260.241	70.8336	84.4198	124.379	255.942	70.7478	81.6952	181.134
ENSG00000162688.17	752.61	370.103	494.533	359.349	672.473	387.635	441.495	470.497
ENSG00000117620.15	831.681	510.474	700.848	620.938	660.355	475.637	617.945	791.354
ENSG00000283761.1	3.93627	1.46942	5.58083	5.58083	5.8985	6.77018	1.54014	5.02683
ENSG00000156875.14	52.0194	23.5709	53.0004	48.0955	60.7954	45.683	100.565	30.5706
ENSG00000156876.10	608.936	232.524	284.173	414.078	495.487	261.393	304.566	550.172
ENSG00000122435.10	447.41	258.48	323.497	227.884	384.04	229.017	318.656	291.237
ENSG00000122477.13	10.8217	16.3155	13.961	22.5943	13.6465	12.6954	22.2064	17.4509
ENSG00000137992.15	1011.23	837.015	828.975	987.104	802.173	710.23	698.634	1177.4
ENSG00000271415.1	0.899217	0.134219	0.899217	3.19421	1.19946	1.19946	2.25675	0.142172
ENSG00000224616.3	27.5163	27.5163	30.5531	12.3321	30.0867	23.3983	20.0541	20.0541
ENSG00000137996.13	1729.01	1173.04	1325.37	999.059	1258.42	1066.16	1597.82	1024.96
ENSG00000079335.20	178.649	95.2466	158.383	133.44	145.57	110.582	152.373	179.586
ENSG00000181656.7	0.0828606	0.850075	3.91893	0.0828606	0.206478	2.29537	2.29537	0.206478
ENSG00000162692.12	42.165	58.9848	85.7434	104.857	36.8132	47.7693	78.6454	81.6334
ENSG00000162694.14	749.212	528.933	714.391	470.647	626.553	412.677	563.221	605.788
ENSG00000273204.1	1.04819	2.58972	3.36048	0.277425	1.15759	1.15759	2.1776	3.19761
ENSG00000162695.12	930.563	1077.34	726.445	610.244	792.084	1024.79	746.184	761.128
ENSG00000230946.3	2.79331	2.79331	0.401219	1.19858	2.89845	2.89845	1.15228	3.77153
ENSG00000117543.21	898.527	566.818	459.766	580.388	687.487	482.241	548.256	641.877
ENSG00000235795.1	7.54695	2.82781	2.82781	6.76043	7.20911	1.77535	0.869724	4.49223
ENSG00000233184.7	104.905	114.191	59.2481	61.5697	92.2171	92.2171	45.8527	93.2036
ENSG00000225938.1	2.72033	0.213822	2.72033	1.88483	0.352527	3.80627	1.21596	2.94284
ENSG00000170989.10	62.5798	390.445	92.1032	127.842	61.088	322.056	60.1106	187.174
ENSG00000228399.1	2	2	4	0	1	1	1	1
ENSG00000226715.4	0.950841	0.166056	0.166056	3.3052	1.12335	0.177784	2.06892	3.01449
ENSG00000118733.17	3305.22	731.824	804.515	2982.85	2867.37	1019.19	693.264	3336.18
ENSG00000060718.22	59.8897	1116.13	1032.66	96.3118	85.1063	754.571	735.008	159.008
ENSG00000224613.7	0.156012	3.42002	2.60402	0.156012	0.323889	1.20789	4.74391	1.20789
ENSG00000185946.16	348.899	230.685	448.809	303.139	270.044	231.85	378.431	338.173
ENSG00000240038.6	5.85917	17.3301	2.80026	8.15335	5.74783	13.2059	4.68239	10.0096
ENSG00000232952.1	0.0419747	1.03542	1.03542	2.02886	1.05981	0.250855	4.29563	0.250855
ENSG00000198890.9	2078.75	683.708	499.15	793.046	1860.79	816.672	669.921	1160.74
ENSG00000162631.20	3298.55	2035.93	3105.8	3608.35	2864.05	2045.58	2648.81	3636.26
ENSG00000224550.1	3.37625	1.76589	0.960714	1.76589	0.368465	0.368465	2.13245	3.01445
ENSG00000134215.16	7.13012	13.7995	27.9718	12.9658	3.63585	20.0062	31.207	18.283
ENSG00000085491.17	1976.99	899.179	1283.13	1524.61	1537.16	964.527	1412.91	2122.39
ENSG00000162636.16	807.292	461.44	813.727	717.21	677.826	510.14	883.377	855.429
ENSG00000162639.16	365.555	278.931	424.823	307.806	279.507	229.127	374.67	276.709
ENSG00000285923.1	2.13752	2.9155	4.47144	2.9155	3.12153	2.1447	4.09837	3.12153
ENSG00000134186.12	2353.4	1678.99	1619.65	2026.6	1904.75	1420.98	1694.37	2119.97
ENSG00000143107.10	1.66329	0.152283	1.66329	1.66329	0.134586	1.1795	1.1795	1.1795
ENSG00000116266.11	812.002	736.973	745.012	928.117	629.522	670.378	893.002	983.052
ENSG00000162641.20	2.24681	0.274374	6.19167	2.24681	3.90519	0.690352	12.746	1.49406
ENSG00000121957.15	834.12	381.247	392.274	664.785	751.462	391.96	395.725	745.815
ENSG00000121940.16	849.367	617.99	651.479	578.412	766.818	601.978	623.668	633.428
ENSG00000085433.16	664.221	558.184	865.179	620.609	655.273	583.698	1010.62	704.954
ENSG00000244716.3	35.2439	22.6195	26.5646	34.4548	31.7267	22.4696	23.3953	35.4295
ENSG00000197780.10	1173.24	975.222	1250.5	865.999	838.11	778.781	1497.42	1109.69
ENSG00000273382.1	21.4733	29.1707	22.3286	18.0522	16.5895	25.941	31.0417	15.7394
ENSG00000215717.7	717.064	733.663	1103.6	304.448	600.77	695.009	1161.54	430.952
ENSG00000251484.3	0.860269	0.106832	3.12058	0.860269	1.30649	1.30649	1.30649	0.0857929
ENSG00000116299.17	6.10137	30.1086	17.7178	12.2968	6.74928	26.375	15.5809	10.6744
ENSG00000031698.13	7077.86	4209.63	5345.73	5399.35	5545.01	4153.99	6558.27	5402.49
ENSG00000143126.8	1715.51	826.622	846.34	1523.85	1827.05	1049.55	917.31	1442.52
ENSG00000134222.16	1534.2	855.494	1073.73	925.919	1392.84	796.171	1037.8	987.5
ENSG00000134243.12	2292.43	1839.31	1458.75	1503.52	2067.2	2053.02	1530.6	1736.13
ENSG00000143106.13	4673.96	3212.53	3388.58	2931.3	3479.43	2850.07	4374.39	3012.7
ENSG00000143028.9	4.45197	3.66416	5.23979	15.4813	10.1939	2.74212	10.1939	13.9198
ENSG00000162650.16	410.543	304.012	402.051	338.75	316.446	286.083	398.047	351.554
ENSG00000174151.15	337.095	259.761	409.743	226.171	275.151	264.708	399.525	220.085
ENSG00000181754.7	91.8385	69.8577	38.7815	90.3225	82.6394	67.5245	55.8977	80.314
ENSG00000156097.12	1.90732	1.1555	5.66645	4.91462	1.36391	1.36391	3.5993	3.5993
ENSG00000065135.12	4756.01	2821.28	3256.65	3765.75	3712.5	2663.27	3689.93	4301.41
ENSG00000134183.13	24.1018	12.239	13.0298	14.6115	22.2131	11.4943	9.70787	7.02816
ENSG00000116337.20	2209.83	1446.95	1662.42	1292.47	1848.86	1381.63	2145.18	1342.61
ENSG00000168765.17	6427.41	966.743	1001.63	2072.37	5481.42	1068.07	1138.15	2377.96
ENSG00000213366.13	378.083	232.072	219.076	174.738	306.11	203.082	128.94	156.864
ENSG00000134184.13	1891.62	705.286	682.175	971.055	1594.1	656.521	674.609	979.095
ENSG00000260246.1	4.02091	1.73585	0.97416	0.97416	2.30112	2.30112	1.25474	0.208367
ENSG00000134201.12	3.94723	3.94723	6.83189	4.90878	8.35975	6.72373	0.997676	4.26971
ENSG00000134202.11	1418.34	723.741	616.881	942.806	1047.66	529.937	586.674	1003.08
ENSG00000184371.14	116.255	303.74	394.313	166.975	110.952	364.373	602.161	157.029
ENSG00000168710.18	4190.06	2799.86	3232.28	3625.53	3582.46	2660.41	3385.96	3661.06
ENSG00000143093.15	1268.71	931.731	1004.11	1028.23	1170.78	865.079	1084.26	991.975
ENSG00000258634.3	230.137	189.844	100.897	101.657	194.232	155.947	101.254	130.788
ENSG00000156150.9	4.4217	2.75942	2.75942	1.92829	4.8362	2.26064	1.40212	1.40212
ENSG00000258673.1	2.64939	0.387033	4.91175	4.91175	3.55648	1.33226	3.55648	1.33226
ENSG00000186150.5	4.79333	1.79564	1.04622	1.79564	1.22609	2.49259	2.49259	1.22609
ENSG00000197106.7	3.3176	13.7041	3.3176	5.71448	3.73788	5.56232	14.6846	5.56232
ENSG00000116396.15	19.8434	14.1994	58.4103	30.1906	21.6103	32.1443	101.831	23.2309
ENSG00000227963.1	11.2715	5.04405	4.26562	4.26562	8.25201	3.38173	7.27796	9.22607
ENSG00000162775.17	753.663	382.967	610.22	617.472	727.536	328.445	625.067	649.336
ENSG00000224699.9	33.5658	25.9242	56.4907	12.9335	32.4376	17.0044	43.7553	15.9755
ENSG00000168679.18	46.4793	61.4055	108.423	57.6739	36.9113	67.4959	63.9669	51.0273
ENSG00000273373.1	163.926	148.559	183.903	80.1759	178.965	140.582	122.401	97.1496
ENSG00000134248.14	997.014	1035.18	956.41	638.888	734.228	821.479	1217.67	896.266
ENSG00000177301.16	1936.42	269.598	390.033	1650.59	2098.5	360.542	501.678	1831.61
ENSG00000259834.1	26.2079	17.9839	14.3287	18.8976	20.1715	18.5878	25.7145	38.3843
ENSG00000177272.9	15.2081	9.58475	15.2081	19.8942	19.9509	18.4029	35.4313	16.0808
ENSG00000143119.14	8.12647	2.88868	3.63693	5.13345	5.70784	2.5921	2.5921	2.5921
ENSG00000261654.1	27.5291	24.354	31.4979	20.3852	30.2319	14.6867	18.1412	22.4593
ENSG00000232811.1	37.7455	28.5056	29.3456	54.5453	33.7518	32.8919	26.8721	63.8508
ENSG00000121931.16	567.204	578.153	626.161	901.577	416.153	444.378	668.466	952.425
ENSG00000273010.1	2.225	0.665468	8.46315	3.00477	2.29284	3.25002	7.07875	7.07875
ENSG00000156171.15	430.554	419.578	416.442	400.763	349.627	351.967	350.407	426.066
ENSG00000134255.14	575.344	335.316	454.951	324.715	493.92	424.278	456.612	403.137
ENSG00000162777.17	0.117209	2.92716	3.86381	1.05386	0.476977	1.29499	7.83912	1.29499
ENSG00000173947.14	4.48779	9.12446	7.26979	4.48779	3.82105	14.1637	9.39015	8.59456
ENSG00000085465.13	32.1042	51.8366	40.7865	21.0541	18.5784	51.6518	30.5216	27.7654
ENSG00000260948.1	8.30118	7.46132	10.8208	5.7816	7.32844	12.1276	9.72803	13.7273
ENSG00000233337.1	14.0844	7.08874	5.53414	3.97955	10.6031	3.00529	2.05556	8.70367
ENSG00000243960.1	5.9682	2.85898	2.85898	4.41359	2.42535	3.345	5.18431	1.50569
ENSG00000116455.14	1143.51	470.782	614.661	561.776	975.349	417.663	825.391	717.578
ENSG00000199890.1	3.10392	1.06554	1.06554	1.06554	6.01145	1.17726	0.371556	1.17726
ENSG00000116459.11	5727.18	3130.07	3717.37	3851.1	4789.49	2700.37	4311.37	4696.36
ENSG00000143110.12	5.13837	2.11834	7.40339	4.38336	2.57044	5.55213	3.56433	1.57654
ENSG00000116473.14	1675.72	1486.87	1374.48	1223.85	1302.77	1218.54	1539.25	1452.98
ENSG00000231346.5	0.342122	4.40724	2.78119	0.342122	0.367572	2.9877	5.60782	2.9877
ENSG00000215867.4	3.19421	0.899217	0.899217	0.134219	0.142172	1.19946	2.25675	1.19946
ENSG00000197852.12	20.8986	42.3962	95.7419	16.1214	28.6082	47.8499	103.742	31.357
ENSG00000227811.3	0.0815887	1.88387	3.68615	0.98273	0.395134	1.22426	6.19899	0.395134
ENSG00000284830.1	0.121871	0.877142	7.67458	0.877142	2.74466	1.52061	3.96871	0.296557
ENSG00000064703.13	1010.61	735.443	898.801	755.268	825.798	681.544	866.485	998.718
ENSG00000171385.10	2.83381	3.68568	2.83381	3.68568	3.11449	3.94464	1.45419	2.28434
ENSG00000143079.15	905.926	809.946	1334.15	862.448	797.986	848.789	1410.25	1129.08
ENSG00000134245.18	54.8682	79.3362	63.2791	47.9866	33.2968	55.556	49.0637	64.8307
ENSG00000273483.1	4.66807	4.66807	4.66807	2.78239	0.862711	1.68295	6.60436	4.96389
ENSG00000007341.19	368.548	242.991	339.049	249.798	320.815	273.423	307.274	240.7
ENSG00000116489.13	5454.16	4389.97	3368.2	4255.79	4762.4	3852.11	4111.76	5132.01
ENSG00000235299.2	5.28224	2.94039	1.37916	2.94039	5.05585	2.17135	3.13285	4.09435
ENSG00000155363.18	2091.08	1381.35	1767.14	1385.22	1928.45	1523.41	1874.18	1438.98
ENSG00000225075.1	7.22309	4.25664	6.48148	1.29019	4.96643	1.59013	2.71556	2.71556
ENSG00000155366.17	1039.1	2384.78	2547.73	968.615	933.48	1839.16	4360.23	1082.51
ENSG00000155367.15	6.71789	10.0755	20.9879	9.23612	8.11658	14.0951	26.0523	8.97066
ENSG00000155380.13	4293.49	3601.07	4429.68	4213.02	3531.36	3512.12	4247.42	4970.16
ENSG00000229020.4	4.596	1.36665	3.51955	2.4431	4.64987	0.759056	6.20619	10.097
ENSG00000226419.8	379.072	506.609	267.886	386.43	282.179	374.236	239.219	533.801
ENSG00000287807.1	7.2426	8.07529	6.40991	1.41379	3.65577	5.38854	1.92299	11.4533
ENSG00000238198.2	6.61943	15.2233	9.74811	7.4016	14.0972	13.1435	8.37485	8.37485
ENSG00000198799.12	486.804	464.019	552.017	488.375	404.696	389.508	479.79	511.009
ENSG00000081026.19	143.686	98.9041	165.685	94.9759	91.0234	101.363	166.219	122.981
ENSG00000232499.2	2.83042	4.46028	2.01549	6.09014	2.43401	2.43401	6.83006	1.5548
ENSG00000116793.16	1500.26	1097.28	1334.37	842.186	1382.96	1108.98	1361.01	832.14
ENSG00000232450.1	18.939	14.5526	25.0799	15.4298	15.0664	20.8747	31.6616	16.7259
ENSG00000081019.13	551.208	379.531	542.955	434.831	448.059	365.132	562.411	591.217
ENSG00000134242.16	5.94303	1.22167	3.58235	12.2382	8.03253	3.46821	9.85826	12.5969
ENSG00000226167.1	13.3708	3.63727	5.58399	11.4241	11.5904	5.17284	6.77723	26.8321
ENSG00000188761.13	15.247	5.65004	7.24953	13.6475	16.862	5.01295	11.3932	10.4817
ENSG00000134262.13	849.428	322.983	299.723	625.359	732.459	326.839	370.369	669.143
ENSG00000118655.7	1427.24	505.477	618.345	1129.39	1265.15	553.896	778.251	1305.25
ENSG00000235527.7	2.10275	4.60008	1.2703	0.437857	2.10841	5.4473	5.4473	1.27369
ENSG00000163349.22	2115.85	1306.94	2090.69	1421.71	2155.12	1435.55	2195.1	1919.91
ENSG00000116774.12	8971.97	3683.37	3895.39	10635.8	8422.08	3936.76	4063.52	10672.7
ENSG00000282048.1	0.18289	1.08259	2.882	0.18289	0.276688	0.276688	4.34442	3.53087
ENSG00000134207.17	1978.18	453.71	588.901	1526.48	1915.21	604.957	781.497	1894.07
ENSG00000197323.12	1949.89	1354.37	1143.96	1278.28	1720.22	1202.26	1295.98	1701.48
ENSG00000236480.1	2.03466	1.1333	4.73874	2.03466	3.01214	1.36281	7.13546	1.36281
ENSG00000116752.6	1492.79	989.461	874.371	1163.63	1096.64	836.482	1096.64	1316.85
ENSG00000175984.15	79.7292	66.8646	41.1354	77.3171	74.4469	61.8982	56.5201	96.8553
ENSG00000116748.21	3.28293	0.181318	0.181318	8.71076	7.48901	0.59545	0.59545	2.56504
ENSG00000213281.5	4936.65	2383.02	2471.82	2639.45	3898.9	2275.74	3118.29	3679.99
ENSG00000009307.16	25932.9	14392.8	23223.3	21183.8	22067	14106.8	24729.9	20486.6
ENSG00000201900.1	4.82433	1.06567	3.32087	1.8174	2.42352	0.282115	2.42352	2.42352
ENSG00000052723.12	1337.11	1093.4	867.1	1075.99	1066.2	981.389	842.181	1320.65
ENSG00000134198.10	57.8349	683.553	53.9193	74.2806	72.3457	645.729	144.138	162.326
ENSG00000285698.1	1.81614	3.41148	1.01847	1.81614	1.23149	3.03557	2.13353	0.329448
ENSG00000228035.1	1.08409	1.08409	0.117729	3.01682	0.330023	1.1384	1.1384	5.98865
ENSG00000134259.6	32.9377	221.951	43.651	78.0866	27.3578	155.383	64.39	116.235
ENSG00000173218.15	1022.65	854.178	754.341	861.978	1016.77	855.067	816.335	899.608
ENSG00000118729.12	32.7885	1.48993	9.12372	16.7575	19.6345	2.86053	6.00564	20.6828
ENSG00000177551.5	0.360003	0.360003	1.19959	3.71835	1.97259	1.97259	1.97259	6.06342
ENSG00000163393.13	13.6206	73.3288	26.3583	19.9894	11.4591	72.9345	44.4907	27.9749
ENSG00000173212.4	160.542	11.7432	10.1518	89.7235	137.15	20.3202	14.8007	141.75
ENSG00000163399.16	21472.2	4655.21	7360.16	15488.4	19688.4	6991.27	10100.5	20188.4
ENSG00000203865.11	524.744	82.1124	141.386	303.043	351.074	116.739	142.21	398.96
ENSG00000233154.6	1.04442	2.97723	2.01082	1.04442	1.20524	5.26799	1.20524	1.20524
ENSG00000224950.2	12.0386	8.98345	11.0202	12.0386	6.24798	15.1539	13.5346	11.1057
ENSG00000286276.1	2.00856	2.00856	3.7823	1.12169	2.11277	2.11277	5.43016	1.28342
ENSG00000116815.16	196.971	244.346	185.824	259.209	144.769	189.252	314.461	255.975
ENSG00000177173.5	6.46019	5.52838	21.3692	5.52838	4.73512	6.36535	36.5245	9.6258
ENSG00000143061.18	122.738	145.667	173.51	72.7848	109.973	161.966	183.115	66.7924
ENSG00000134247.10	210.184	261.187	288.779	174.231	244.927	325.245	285.086	172.3
ENSG00000134256.12	9.07234	0.661063	2.19039	4.48437	7.66147	4.42589	3.34736	3.34736
ENSG00000236137.1	1.20142	1.20142	2.85837	1.20142	3.58608	2.7765	1.15733	2.7765
ENSG00000116830.12	2029.4	867.586	998.516	997.727	2029	970.697	1067.16	1311.6
ENSG00000134253.10	115.238	156.097	165.348	105.986	109.36	144.36	139.63	84.7658
ENSG00000271427.1	0.820606	1.62943	5.67358	2.43826	3.82656	7.83595	3.02468	7.03407
ENSG00000198162.12	1393.86	1671.14	1806.22	1463.38	1286.02	1523.29	1766.1	1575.91
ENSG00000279513.1	1.90755	1.90755	4.44415	2.75308	0.524191	1.37827	4.79459	3.08643
ENSG00000183508.5	14.8797	19.5786	27.0967	16.7592	18.6333	15.4218	38.7056	25.8593
ENSG00000196505.11	490.691	363.933	597.302	457.952	468.735	351.166	659.248	535.672
ENSG00000065183.16	1942.32	862.138	1205.48	1294.21	1662.21	932.136	1454.05	1464.21
ENSG00000155761.14	3.9833	0.188856	0.947746	0.188856	1.14489	1.14489	2.3309	2.3309
ENSG00000092607.15	12.0822	31.9386	24.4924	19.5283	9.65053	29.701	33.1881	18.3681
ENSG00000116874.12	402.026	179.931	192.444	300.363	348.837	185.485	209.507	351.719
ENSG00000224238.2	0.902786	0.109187	2.48999	2.48999	0.282714	3.02596	0.282714	1.19713
ENSG00000231365.6	262.046	181.02	161.354	217.206	223.276	208.401	126.59	215.839
ENSG00000260941.1	3.33757	1.70492	13.1335	2.52125	6.20972	3.60246	16.6388	5.34064
ENSG00000198857.3	1.35849	0.536832	8.75339	2.18014	0.663251	4.11487	11.0181	4.97778
ENSG00000143067.5	102.935	209.809	173.356	66.4811	99.4467	180.947	261.58	87.3083
ENSG00000092621.13	10363.1	5178.37	4791.47	9345.8	8835.66	5618.93	6385.07	8880.21
ENSG00000134250.20	3033.49	2813.2	4374.94	2775.98	2846.52	3125.21	3800.58	3003.84
ENSG00000265808.4	2160.46	1812.04	3000.09	1692.1	1761.13	1773.52	3243.37	1962.89
ENSG00000274642.1	22.5073	14.8377	39.3803	25.5751	19.9311	19.9311	33.9141	14.9371
ENSG00000223804.5	5.91744	2.49252	6.77367	5.06121	9.26856	3.45456	5.1157	7.60741
ENSG00000270231.4	246.146	131.007	232.047	188.968	232.78	166.101	261.357	194.677
ENSG00000270392.2	13.7257	7.1892	6.37214	7.1892	8.30284	14.4222	5.68025	11.7996
ENSG00000275131.3	83.1091	103.52	183.595	76.0437	73.2285	140.706	165.415	90.3353
ENSG00000273136.7	40.7481	30.6535	55.5017	27.5475	42.8457	30.2998	46.706	22.5792
ENSG00000226067.7	28.6586	30.205	15.5149	27.8855	30.9983	22.1892	25.1256	17.2952
ENSG00000277610.1	6.41984	0.427674	3.42376	2.67474	2.43438	2.43438	3.92603	2.43438
ENSG00000188610.12	197.24	57.4222	130.509	173.408	176.975	59.8123	123.468	198.194
ENSG00000171943.12	387.612	366.219	478.728	325.019	364.436	269.821	445.404	382.631
ENSG00000230806.1	0.232561	3.35498	4.13559	1.01317	0.328953	2.25029	4.17163	1.28962
ENSG00000227082.3	1.88027	1.88027	4.44926	3.59293	1.43454	0.588228	5.66607	2.28084
ENSG00000272583.1	2.85196	1.86741	3.83652	1.86741	6.28011	0.564761	2.19772	0.564761
ENSG00000231752.6	41.1776	28.9684	19.2011	24.8987	37.0671	25.5998	9.72203	32.6566
ENSG00000224857.1	2.52273	1.71346	0.904198	0.0949308	0.257539	1.14877	0.257539	2.93122
ENSG00000277702.1	6.07816	22.918	13.2952	7.68196	5.74585	9.34977	23.7654	4.84487
ENSG00000273213.3	36.7207	20.5302	23.6141	15.1334	30.6705	33.6888	22.6216	22.6216
ENSG00000263513.5	109.579	33.8523	66.0764	113.607	74.3283	31.2164	65.3467	136.302
ENSG00000270872.2	54.4338	19.2075	67.4522	36.8206	59.9537	28.5065	48.4231	34.796
ENSG00000232527.8	4.68874	1.22411	2.95642	0.357953	4.64865	7.1323	1.33712	1.33712
ENSG00000207205.1	2.76732	0.146095	5.38855	1.89358	2.2573	0.576907	8.13868	0.576907
ENSG00000266338.6	564.065	528.524	601.152	356.998	454.642	535.762	573.879	366.68
ENSG00000227212.3	3.2261	0.94988	0.94988	0.191141	1.15264	1.15264	2.32938	1.15264
ENSG00000275291.1	16.5278	0.241413	9.12492	3.20258	5.5974	1.40956	5.5974	1.40956
ENSG00000278099.1	8.85427	0.0151482	7.38109	0.751742	1.30744	1.30744	2.96669	1.30744
ENSG00000277918.1	2.48536	0.151621	2.48536	1.70745	2.16462	0.28792	0.28792	2.16462
ENSG00000196369.11	261.002	169.975	289.01	222.88	220.171	156.423	278.295	196.735
ENSG00000215784.6	99.2068	33.8648	59.0569	96.845	81.1876	36.9124	65.1731	106.622
ENSG00000272419.6	9.99206	8.44834	22.3418	9.99206	7.69777	12.7623	18.8396	13.7752
ENSG00000281571.2	1.89922	1.13422	1.89922	4.19421	3.25675	2.19946	2.19946	1.14217
ENSG00000223612.3	13.616	5.75714	9.6866	12.8302	9.49052	7.59885	15.1655	9.49052
ENSG00000276216.1	2.30456	0.0572967	4.55182	0.806385	0.398053	0.398053	2.6482	0.398053
ENSG00000162825.16	123.544	138.186	86.9397	97.1889	84.838	92.1317	103.593	72.3346
ENSG00000234367.1	2.18628	2.95937	2.95937	0.640107	2.88641	2.88641	4.55153	3.71897
ENSG00000270722.1	10.8699	0.3549	5.61241	2.60812	1.7612	0.594952	5.25994	5.25994
ENSG00000272150.5	50.0238	70.9641	36.8392	36.0637	51.1344	64.9421	36.3405	39.2992
ENSG00000117262.19	173.567	163.791	123.937	134.465	156.953	134.718	123.6	140.276
ENSG00000174827.14	13.469	17.8803	17.8803	20.0859	10.9552	12.6937	17.0401	11.8245
ENSG00000117281.16	26.4519	33.4496	34.1493	32.05	26.5636	25.7145	25.7145	21.4689
ENSG00000265491.5	1561.36	1092.48	1599.03	1184.65	1344.93	1038.16	1594.52	1608.14
ENSG00000186141.9	1125.46	732.216	848.791	826.253	934.438	707.46	1014.03	934.438
ENSG00000186364.12	67.4153	56.847	103.649	58.3567	64.4288	43.1039	78.6454	48.1813
ENSG00000131788.16	793.238	561.024	689.943	581.042	737.448	605.82	824.9	613.032
ENSG00000198483.13	1.72429	0.899193	0.899193	1.72429	0.265752	1.11386	1.96198	0.265752
ENSG00000143127.13	27.9959	74.0789	112.186	50.1512	37.7014	104.67	160.063	40.1817
ENSG00000131779.11	383.982	508.181	371.725	418.3	305.034	488.278	448.634	402.823
ENSG00000265241.7	1650.62	1577.02	1628.22	1032.17	1359.43	1232.4	1916.57	1236.03
ENSG00000211451.12	9.12188	18.4282	15.3261	9.12188	6.96232	9.86324	15.6651	14.6981
ENSG00000234222.6	9.80412	25.5866	12.9606	13.7497	12.8682	13.8052	13.8052	25.9866
ENSG00000271601.4	1135.52	1091.14	1009.26	915.896	980.564	902.729	875.858	1088.98
ENSG00000272031.3	61.3669	55.1629	83.8564	26.4695	56.4834	53.5455	76.0694	28.0836
ENSG00000121851.13	176.8	215.181	158.738	141.429	110.419	133.332	181.907	135.165
ENSG00000265972.6	1147.13	1720.57	772.945	2660.36	700.148	1738.52	993.045	2423.52
ENSG00000168509.20	10.4306	1.15047	0.377123	7.33721	9.68666	0.806157	1.79288	3.76632
ENSG00000287190.1	22.3746	0.700512	11.9113	3.69005	4.67607	3.30598	11.5265	7.41626
ENSG00000233396.8	45.9165	27.3988	71.3784	52.0891	37.3591	25.5864	55.018	57.9612
ENSG00000271425.9	94.2672	77.0297	113.753	65.7879	75.0562	92.624	82.0833	66.8578
ENSG00000264343.6	3.66613	6.02784	6.02784	1.30442	2.477	2.477	7.11577	2.477
ENSG00000277406.2	13.1453	5.37866	7.70864	1.49535	1.03268	2.95424	7.75812	10.6405
ENSG00000273768.1	11.5982	1.20871	6.40347	3.43503	3.10021	1.75875	5.78313	3.10021
ENSG00000287978.1	20.2148	8.39489	10.6111	8.39489	5.90317	8.62921	9.99224	9.99224
ENSG00000274428.1	2.33129	0.840113	4.56805	0.840113	0.435499	0.435499	2.58514	0.435499
ENSG00000268043.7	322.825	284.672	318.506	306.988	295.059	293.977	283.161	283.161
ENSG00000244371.2	2.96799	1.42875	2.19837	5.27687	5.06051	3.07413	3.07413	4.06732
ENSG00000227242.4	1.98268	3.53278	0.432588	11.2833	4.60998	1.63628	1.63628	9.56615
ENSG00000225603.3	6.39682	0.134611	0.134611	3.26572	0.505096	0.505096	1.45731	6.21835
ENSG00000230832.3	2.22693	12.2294	2.99635	15.307	3.27528	2.29056	4.26	14.1072
ENSG00000286172.1	1.60497	0.121758	2.34657	2.34657	1.34586	0.273964	1.34586	0.273964
ENSG00000131791.8	803.077	627.347	827.109	532.723	607.742	553.55	744.351	643.87
ENSG00000180867.11	45.0485	41.9128	53.6717	35.6413	30.0845	31.8725	44.3885	47.9646
ENSG00000131781.13	8.3422	6.81053	18.2981	5.27886	9.96947	14.1306	6.84864	4.76809
ENSG00000226015.2	9.13135	5.72595	6.5773	2.32055	2.81225	2.81225	11.3368	7.92695
ENSG00000131778.19	27.0328	15.1889	6.50334	12.0305	16.7106	10.1677	12.9718	27.927
ENSG00000278811.4	21.3612	7.32276	13.5621	23.701	22.1816	11.7161	21.2302	24.0844
ENSG00000116128.11	823.463	584.492	1106.23	610.617	904.626	654.481	924.184	593.746
ENSG00000162836.12	313.336	307.818	828.127	391.383	291.617	349.805	804.986	392.039
ENSG00000265107.3	1.72429	1.72429	0.899193	0.899193	0.265752	1.96198	1.11386	0.265752
ENSG00000188092.15	102.408	103.186	94.6246	72.8323	88.8844	98.1966	65.6039	92.6093
ENSG00000215859.9	11.3398	9.72254	5.67952	11.3398	11.1959	1.85534	4.40276	9.4976
ENSG00000274372.5	4.15483	1.83238	1.83238	2.60653	2.25867	0.434721	1.3467	3.17064
ENSG00000206585.1	7.85671	1.82805	2.58163	2.58163	4.77296	1.57346	0.506956	2.63996
ENSG00000229828.2	1.629	0.884198	1.629	1.629	1.17903	0.349835	1.17903	0.349835
ENSG00000263956.6	259.309	229.536	274.577	247.858	241.567	253.693	216.45	202.593
ENSG00000225080.1	1.91282	0.308613	4.31912	1.11071	3.90726	0.313432	2.11034	3.90726
ENSG00000198658.4	2.06718	5.33626	4.51899	2.06718	4.98868	4.98868	0.57461	3.22305
ENSG00000228626.1	4.77289	1.59301	3.18295	8.74772	3.35392	4.26839	5.18286	9.75519
ENSG00000274020.4	30.2843	31.8045	53.8477	30.2843	28.819	42.4317	40.163	35.6254
ENSG00000231551.8	4.48303	10.0253	13.1923	8.44177	4.85683	9.46422	13.1501	5.77831
ENSG00000201183.1	1.90389	1.03495	0.166017	1.90389	1.09381	2.75801	2.75801	0.261713
ENSG00000225871.2	1.12252	0.335851	5.84254	1.90919	2.22041	0.336918	5.04564	4.10389
ENSG00000280649.2	6.86996	1.49304	3.28534	5.07765	3.35708	3.35708	11.4712	6.60272
ENSG00000274210.1	2.74795	1.18653	4.30936	5.87077	3.33931	0.514775	5.22233	2.3978
ENSG00000270629.6	212.261	225.453	260.372	185.877	163.557	193.106	240.037	149.651
ENSG00000178104.19	1536.52	1345.39	1510.66	1441.42	1302.57	1328.99	1485.08	1701.45
ENSG00000222788.1	5.41871	1.51862	3.07866	3.85868	4.05497	4.05497	3.11178	5.94136
ENSG00000269713.7	900.183	576.538	738.36	604.148	803.34	571.387	729.769	599.998
ENSG00000274265.5	82.5258	87.0899	65.7907	110.671	60.6376	67.529	80.3274	95.0947
ENSG00000215861.6	437.664	237.954	327.34	444.911	359.63	219.642	312.968	496.03
ENSG00000272755.1	4.41029	2.75856	3.58442	3.58442	4.04033	0.731949	2.38614	3.21323
ENSG00000286219.1	5.21525	9.28273	11.7232	9.28273	11.0665	7.54797	10.1869	3.14976
ENSG00000277147.6	50.436	43.6257	46.1796	35.1129	36.1446	40.394	57.3916	33.595
ENSG00000275557.1	3.94777	3.94777	2.19807	4.82262	5.69347	3.19342	5.69347	2.36008
ENSG00000206828.1	13.7847	1.09291	7.81209	0.346336	4.77108	1.76594	6.27365	3.26851
ENSG00000203814.6	16.8551	4.32812	25.4675	15.2893	11.961	11.0052	21.5193	25.3426
ENSG00000233030.2	0.20617	1.02348	4.29273	0.20617	1.18085	1.18085	5.54669	1.18085
ENSG00000183598.4	7.88452	2.67258	4.16171	3.41714	2.74641	0.767074	4.72575	1.75674
ENSG00000270882.2	3.38475	2.38788	3.38475	1.39102	2.23023	2.99688	6.83012	6.83012
ENSG00000220323.4	19.7215	11.3255	60.9382	19.7215	23.4444	23.4444	48.6021	24.5382
ENSG00000261716.2	62.5218	55.6852	175.705	66.3199	70.8418	92.8459	133.38	87.0554
ENSG00000184678.10	79.7973	95.4292	314.276	176.88	93.4787	137.034	381.812	202.366
ENSG00000184260.6	15.987	9.10249	7.5726	6.04271	12.8791	4.83218	7.84976	6.8439
ENSG00000184270.6	4.08551	1.7662	0.219993	1.7662	3.22888	0.255888	1.24689	2.23788
ENSG00000178096.9	157.83	132.859	116.472	125.836	141.408	132.003	132.944	101.907
ENSG00000159164.10	2416.87	909.855	1532.67	1395.39	2178.61	1130.9	1824.09	1305.19
ENSG00000143368.10	2493.4	1771.84	1746.43	1855.98	2477.86	1763.5	2160.36	2356.57
[truncated: 23,760 more rows]

## Sheet: HEK293 ComBat norm cts
	siSCR_1	siSCR_2	siSCR_3	siEWSR1_1	siEWSR1_2	siEWSR1_3	pEF_1	pEF_2	pEF_3
[truncated: 26,978 more rows]

[truncated: 2 more sheets: A673 Diff Exp out, HEK Diff Exp out]
