# Supplementary material for: Fusion protein EWS-FLI1 is incorporated into a protein granule in cells
Source: bioRxiv preprint, doi:10.1101/2020.05.31.122028, version 4 (2021-05-05)
Supplement: Supplemental Table 3 [file 122028_file10.xlsx]

## Sheet: GO associations A673
UP in EWS	GO ID	Description	p-adj	N	N total	% of total	Genes	0	0	UP in siEF	GO ID	Description	p-adj	N	N total	% of total	Genes	0	0	DN in EWS	GO ID	Description	p-adj	N	N total	% of total	Genes	0	0	DN in siEF	GO ID	Description	p-adj	N	N total	% of total	Genes	0	0	UP in siEF&EEF	GO ID	Description	p-adj	N	N total	% of total	Genes	0	0
UP in EWS	5576	extracellular region	1.6906e-10	105	437	0.24	LY6K OLFML2B SERPINE2 SERPINE1 COL12A1 METRNL OLFML2A ICAM1 LOXL2 CLGN ISLR LIPH CCN2 FAM3C IL13RA2 CCN1 CHGB CXADR OMD NPNT DKK1 MR1 SERPING1 COL8A1 CALCB EBI3 PDGFB PDGFA LY96 NTS LTBP1 FBLN5 PDGFD STC2 HMOX1 NPTX2 A2M TAC1 TGFB2 VCAM1 TSLP LIF VASN INHBE COL1A1 GNPTG COL5A3 NRP1 FLT1 CXCL8 FHL1 TNFAIP2 PIK3CD ADM VLDLR PRSS23 TNFSF13B LFNG ADAMTS3 TIMP2 RSPO2 CASP1 RSPO3 ADAMTS9 COL25A1 TNFRSF…	0	0	UP in siEF	48731	system development	5.9571e-35	364	1392	0.261	ERRFI1 SPON2 OXTR SPARC SERPINE2 AVIL SERPINE1 COL12A1 F11R AQP1 LGALS3 EDNRA ALCAM DPYSL4 CREB3L2 KDR SOX8 CCN2 SOX9 CCN1 SOX4 CMKLR1 EPHA4 MEF2C CXADR UNC5B ISLR2 UNC5C HSPG2 DKK1 RUNX2 EREG DKK3 BCAM MYL6 BTD HOXB9 DDIT3 NINJ1 TXNIP ULK2 COL8A1 KCTD11 ULK1 HOXB8 OBSL1 CRABP2 TSHZ3 EPAS1 SDC2 TSHZ1 PDGFB PDGFA BCL10 PPL SLC5A3 PCDH18 UGCG SGPL1 CHST11 S100A16 MAP2 RDH10 PDGFC MYO6 HMOX1 TSPAN2 …	0	0	DN in EWS	16126	sterol biosynthetic process	2.5235e-06	9	267	0.033	SQLE FDPS MVK HMGCS1 CYP51A1 MVD DHCR7 FDFT1 TM7SF2	0	0	DN in siEF	7049	cell cycle	9.0718e-43	147	873	0.168	RB1 DCLRE1A ERCC6L RIF1 DSCC1 CCNF BCCIP HJURP BUB1B MKI67 SMC4 SMC2 CDC20 SOX2 CCND1 PTTG1 CHEK2 PSMD3 RCC1 OIP5 KNTC1 FBXO5 GTSE1 TIPIN GAS2L3 BORA LIG1 DDX11 USP2 UBE2E1 LIG3 ESCO2 KNL1 HASPIN CDC25A UHMK1 SGO1 FANCD2 TIMELESS KIF20B ANAPC1 BLM PSMD12 CDCA2 CDCA3 CDCA5 NCAPG FBXO43 PKMYT1 SKA3 NCAPH SKA2 CCNB1 RACGAP1 CLSPN FAM83D MAP2K6 FANCI CDT1 XRCC2 PLK1 FANCA PA2G4 FANCB ZWINT ANLN POLA1…	0	0	UP in siEF&EEF	32502	developmental process	1.0823e-29	520	1778	0.292	SERPINE2 AVIL F11R ENO3 FGFRL1 ALCAM DPYSL4 ZMIZ1 CREB3L2 JUNB RNF111 IER3 MEF2C CXADR UNC5B ZNF160 SERPINF1 PRKCD DAPK3 SOX13 RFX3 UNC5C PRKCA HSPG2 BCAM MYL6 HOXB9 PRKAR1A TEP1 BIN1 DDIT3 PARD3 GPR161 HOXB4 TXNIP HOXB3 HOXB2 HOXB8 HOXB7 FREM2 HOXB6 HOXB5 COL13A1 CRABP2 FLII SHOX2 PDGFA BCL10 SLC5A3 DYNC2LI1 CHST11 RDH10 PDGFC MYO6 HMOX1 HOXC9 JUN FZD2 JUP FZD5 MCAM FZD7 FZD6 FN1 EIF2AK3 PBX3 FZ…	0	0
UP in EWS	44421	extracellular region part	5.2101e-10	65	437	0.148	FLT1 CXCL8 SERPINE2 SERPINE1 COL12A1 FHL1 TNFAIP2 ADM VLDLR OLFML2A TNFSF13B ICAM1 LOXL2 CLGN ADAMTS3 LIPH TIMP2 CCN2 IL13RA2 ADAMTS9 COL25A1 OMD MMP3 LSR NGF NPNT MMP10 ASPN DCN GREM1 VGF MMP15 IL1B MMP19 COL8A1 CDH13 MATN3 HBEGF MATN2 COL11A1 LAMA4 EBI3 PDGFA LY96 FSTL1 LTBP1 THBS1 THSD4 FBLN5 FRZB HMOX1 APOL1 A2M TAC1 CTHRC1 TGFB2 ANGPT2 VCAM1 TSLP CCL20 GDF15 LIF VEGFC COL1A1 COL5A3	0	0	UP in siEF	48856	anatomical structure development	6.4661e-35	387	1392	0.278	SERPINE2 AVIL SERPINE1 COL12A1 F11R ALCAM DPYSL4 CREB3L2 CMKLR1 IER3 MEF2C CXADR UNC5B UNC5C BHLHA15 HSPG2 DKK1 DKK3 BCAM MYL6 HOXB9 DDIT3 TXNIP HOXB8 CRABP2 PDGFB PDGFA BCL10 SLC5A3 CHST11 S100A16 RDH10 PDGFC MYO6 HMOX1 JUN FZD2 JUP FZD5 MCAM FZD7 FZD6 EIF2AK3 FN1 L1CAM COL1A1 COL1A2 RNF103 PCDHB2 SNAI2 TGFB1I1 ADM SHB LFNG CSRP2 HEY1 TIMP2 APC2 ANXA2 METRN ANXA3 SPHK1 BGN EMP1 MMP14 ZEB1 COL2A1…	0	0	DN in EWS	6695	cholesterol biosynthetic process	2.5235e-06	8	267	0.029	FDPS MVK HMGCS1 CYP51A1 MVD DHCR7 FDFT1 TM7SF2	0	0	DN in siEF	279	M phase	7.5228e-36	89	873	0.101	RB1 DCLRE1A ERCC6L DSCC1 NCAPG2 CCNF BUB1B KIF11 BRCA2 MKI67 SMC4 KIF15 SMC2 CDC20 PTTG1 EXO1 NUF2 PBK RCC1 OIP5 KNTC1 FBXO5 DLGAP5 CEP55 LRRCC1 HELLS TIPIN DDX11 HAUS4 KIF23 HAUS6 LIG3 TEX15 KIF22 KNL1 SMC1A CKAP5 CDC25A CIT SGO1 ASPM RP1 ESPL1 INCENP KIFC1 FANCD2 TIMELESS BIRC5 KIF2C MNS1 KIF20B ANAPC1 CDCA2 CDCA3 CDCA5 NCAPG FBXO43 PKMYT1 SKA3 NCAPH AURKB AURKA SKA2 PSMC3IP CCNB1 RAD54L FAM83D…	0	0	UP in siEF&EEF	48856	anatomical structure development	1.1684e-29	448	1778	0.251	SERPINE2 AVIL F11R ENO3 FGFRL1 ALCAM DPYSL4 ZMIZ1 CREB3L2 JUNB IER3 MEF2C CXADR UNC5B ZNF160 SERPINF1 DAPK3 SOX13 RFX3 UNC5C PRKCA HSPG2 BCAM MYL6 HOXB9 PRKAR1A TEP1 BIN1 DDIT3 PARD3 HOXB4 TXNIP HOXB3 HOXB2 HOXB8 HOXB7 FREM2 HOXB6 HOXB5 COL13A1 CRABP2 SHOX2 PDGFA BCL10 SLC5A3 CHST11 RDH10 PDGFC MYO6 HMOX1 JUN FZD2 JUP FZD5 MCAM FZD7 FZD6 FN1 EIF2AK3 FZD8 L1CAM PBX1 COL1A1 RNF103 SNAI1 SNAI2 CDKN1…	0	0
UP in EWS	7275	multicellular organismal development	2.9245e-09	131	437	0.299	ERRFI1 SERPINE2 SERPINE1 COL12A1 F11R CELSR3 AMOT TGM1 HHAT KIF5C KDR SOX8 CCN2 FAM3C CCN1 EPHA4 PDGFRA CXADR ISLR2 SHISA2 NPNT DKK1 MID1 HIC1 GEM HOXB9 DDIT3 TXNIP COL8A1 BEX2 NDRG4 RTN1 CALCB SDC4 EPAS1 PDGFB ITPR1 PDGFA BCL10 FOXO3 NTS SOCS1 HMOX1 TSPAN2 JUN TGFB2 VCAM1 GADD45B FZD6 PBX3 LIF NEB EVX2 COL1A1 NR4A2 RCAN1 BST1 COL5A3 MAFF BCL3 CYP1A1 TPP1 NRP1 CSRNP1 FLT1 CXCL8 FHL1 TNFAIP2 ADM V…	0	0	UP in siEF	44421	extracellular region part	6.983e-35	200	1392	0.143	SPON2 SPARC SERPINE2 SERPINE1 COL12A1 ICAM1 LGALS3 CCN3 CCN2 IL15RA OMD P3H1 HSPG2 EREG DKK3 CCDC80 BTD SPARCL1 COL8A1 CFD EBI3 PDGFA ADAMTS10 ADAMTS15 PDGFC S100A13 HMOX1 APOE A2M TNFSF18 FN1 LIF COL1A1 COL1A2 TCN2 TNFSF4 COL9A3 COL9A2 COL18A1 PCSK1 CTSZ SECTM1 ADM PTPRG CTSO C1QTNF1 TIMP2 CTSD LMCD1 CTSB IL11 FGFBP2 ANXA2 METRN BGN F3 MMP10 MMP11 MMP14 COL2A1 MMP15 MMP17 ANGPTL2 VWA1 MFGE8 MATN…	0	0	DN in EWS	8610	lipid biosynthetic process	8.8502e-06	22	267	0.082	FDPS PCYT1B PCYT2 ACSS2 MVK ELOVL4 HMGCS1 PTGES2 SRD5A1 CYP51A1 ELOVL6 HSD17B7 TM7SF2 SQLE ACLY SCD FASN PNPLA3 B4GALNT1 MVD DHCR7 FDFT1	0	0	DN in siEF	22403	cell cycle phase	7.5228e-36	99	873	0.113	RB1 DCLRE1A ERCC6L DSCC1 CCNF BUB1B MKI67 SMC4 SMC2 CDC20 CCND1 PTTG1 RCC1 OIP5 KNTC1 FBXO5 GTSE1 TIPIN DDX11 LIG3 KNL1 CDC25A SGO1 FANCD2 TIMELESS KIF20B ANAPC1 BLM CDCA2 CDCA3 CDCA5 NCAPG FBXO43 PKMYT1 SKA3 NCAPH SKA2 CCNB1 FAM83D XRCC2 PLK1 FANCA FANCB ZWINT ANLN POLA1 TPX2 KIF18A UBE2S CDK4 NCAPG2 KIF11 BRCA2 KIF15 EXO1 NUF2 PBK POLE DLGAP5 CEP55 LRRCC1 HELLS HAUS4 KIF23 HAUS6 TEX15 KIF22 SMC…	0	0	UP in siEF&EEF	48731	system development	3.3399e-29	417	1778	0.234	SERPINE2 AVIL F11R ENO3 FGFRL1 ALCAM DPYSL4 ZMIZ1 CREB3L2 JUNB MEF2C CXADR UNC5B ZNF160 SERPINF1 DAPK3 RFX3 UNC5C PRKCA HSPG2 BCAM MYL6 HOXB9 PRKAR1A TEP1 DDIT3 PARD3 HOXB4 TXNIP HOXB3 HOXB2 HOXB8 HOXB7 FREM2 HOXB6 HOXB5 COL13A1 CRABP2 SHOX2 PDGFA BCL10 SLC5A3 CHST11 RDH10 PDGFC MYO6 HMOX1 JUN FZD2 JUP FZD5 FZD7 FZD6 FN1 EIF2AK3 FZD8 L1CAM PBX1 COL1A1 RNF103 SNAI1 SNAI2 CDKN1C ACHE ARF4 RARG TGFB…	0	0
UP in EWS	10033	response to organic substance	8.5761e-09	57	437	0.13	BTG1 SERPINE1 ADM VLDLR HERPUD1 EPS8 CASP1 CCN2 CCN1 DUSP4 KLF10 PDGFRA ANXA3 DUSP1 MMP3 FOS NGF DCN VGF DDIT3 IL1B TXNIP MMP19 CDH13 PLIN2 TRIB3 TRIB1 TLR3 ABCG1 TLR2 PPP1R15A OPRD1 COLEC12 FOXC2 PDGFB PDGFA LY96 BCL10 PTGS2 HDAC9 THBS1 SOCS1 IRAK2 HMOX1 FYN MSX1 A2M TAC1 DRD4 JUN TGFB2 ANGPT2 KLF2 COL1A1 NR4A2 CYP1A1 CD24	0	0	UP in siEF	7275	multicellular organismal development	6.6515e-34	415	1392	0.298	SERPINE2 AVIL SERPINE1 COL12A1 F11R ALCAM DPYSL4 CREB3L2 CMKLR1 CUBN MEF2C CXADR UNC5B UNC5C HSPG2 DKK1 DKK3 BCAM MYL6 HOXB9 DDIT3 TXNIP HOXB8 CRABP2 CRABP1 PDGFB PDGFA BCL10 SLC5A3 CHST11 S100A16 RDH10 PDGFC MYO6 HMOX1 JUN FZD2 JUP FZD5 FZD7 FZD6 PBX3 EIF2AK3 FN1 L1CAM COL1A1 COL1A2 RNF103 PCDHB2 SNAI2 FAT3 TGFB1I1 ADM SHB LFNG CSRP2 HEY1 TIMP2 APC2 ANXA2 METRN ANXA3 SPHK1 BGN EMP1 MMP11 MMP14 Z…	0	0	DN in EWS	6694	steroid biosynthetic process	3.5608e-05	11	267	0.041	SQLE FDPS MVK HMGCS1 SRD5A1 CYP51A1 MVD DHCR7 HSD17B7 FDFT1 TM7SF2	0	0	DN in siEF	87	M phase of mitotic cell cycle	4.0347e-34	72	873	0.082	DCLRE1A ERCC6L DSCC1 NCAPG2 CCNF BUB1B KIF11 SMC4 KIF15 SMC2 CDC20 PTTG1 NUF2 PBK OIP5 KNTC1 FBXO5 DLGAP5 CEP55 LRRCC1 HELLS TIPIN DDX11 HAUS4 KIF23 HAUS6 KIF22 KNL1 SMC1A CKAP5 CDC25A CIT SGO1 ASPM RP1 ESPL1 INCENP KIFC1 TIMELESS BIRC5 KIF2C KIF20B ANAPC1 CDCA2 CDCA3 CDCA5 NCAPG PKMYT1 SKA3 NCAPH AURKB AURKA SKA2 CCNB1 FAM83D BUB1 SPAG5 PLK1 MPP6 ZWINT CENPE ANLN TPX2 CENPF MPHOSPH9 KIF18A UBE2S…	0	0	UP in siEF&EEF	7275	multicellular organismal development	1.9454e-27	479	1778	0.269	SERPINE2 AVIL F11R ENO3 FGFRL1 ALCAM DPYSL4 ZMIZ1 CREB3L2 JUNB RNF111 MEF2C CXADR UNC5B ZNF160 SERPINF1 DAPK3 RFX3 UNC5C PRKCA HSPG2 BCAM MYL6 HOXB9 PRKAR1A TEP1 BIN1 DDIT3 PARD3 GPR161 HOXB4 TXNIP HOXB3 HOXB2 HOXB8 HOXB7 FREM2 HOXB6 HOXB5 COL13A1 CRABP2 FLII SHOX2 PDGFA BCL10 SLC5A3 DYNC2LI1 CHST11 RDH10 PDGFC MYO6 HMOX1 HOXC9 JUN FZD2 JUP FZD5 FZD7 FZD6 FN1 EIF2AK3 PBX3 FZD8 L1CAM PBX1 COL1A1 R…	0	0
UP in EWS	32502	developmental process	8.5761e-09	137	437	0.313	ERRFI1 SERPINE2 SERPINE1 COL12A1 F11R CELSR3 LOXL2 AMOT TGM1 HHAT KIF5C KDR SOX8 CCN2 FAM3C CCN1 IER3 EPHA4 PDGFRA CXADR ISLR2 SHISA2 NPNT DKK1 MID1 HIC1 GEM HOXB9 DDIT3 TXNIP COL8A1 CDS1 BEX2 NDRG4 RTN1 CALCB SDC4 EPAS1 PDGFB ITPR1 PDGFA BCL10 FOXO3 NTS SOCS1 HMOX1 TSPAN2 JUN TGFB2 VCAM1 GADD45B FZD6 PBX3 LIF NEB EVX2 COL1A1 NR4A2 RCAN1 BST1 COL5A3 MAFF BCL3 CYP1A1 TPP1 CPM NRP1 CSRNP1 FLT1 CXCL…	0	0	UP in siEF	32502	developmental process	2.1582e-33	439	1392	0.315	SERPINE2 AVIL SERPINE1 COL12A1 F11R ALCAM DPYSL4 CREB3L2 CMKLR1 IER3 CUBN MEF2C CXADR UNC5B PRKCD UNC5C BHLHA15 HSPG2 DKK1 DKK3 BCAM MYL6 HOXB9 DDIT3 TXNIP HOXB8 CRABP2 CRABP1 PDGFB PDGFA BCL10 SLC5A3 CHST11 S100A16 RDH10 PDGFC MYO6 HMOX1 JUN FZD2 JUP FZD5 MCAM FZD7 FZD6 PBX3 EIF2AK3 FN1 L1CAM COL1A1 COL1A2 RNF103 PCDHB2 SNAI2 FAT3 TGFB1I1 ADM SHB LFNG CSRP2 HEY1 TIMP2 APC2 ANXA2 METRN ANXA3 SPHK…	0	0	DN in EWS	8203	cholesterol metabolic process	5.836e-05	11	267	0.041	SQLE FDPS MVK SOAT1 HMGCS1 CYP51A1 MVD DHCR7 ACAT2 FDFT1 TM7SF2	0	0	DN in siEF	22402	cell cycle process	7.3413e-34	112	873	0.128	RB1 DCLRE1A ERCC6L DSCC1 CCNF BUB1B MKI67 SMC4 SMC2 CDC20 SOX2 CCND1 PTTG1 PSMD3 RCC1 OIP5 KNTC1 FBXO5 GTSE1 TIPIN GAS2L3 DDX11 UBE2E1 LIG3 KNL1 CDC25A UHMK1 SGO1 FANCD2 TIMELESS KIF20B ANAPC1 BLM PSMD12 CDCA2 CDCA3 CDCA5 NCAPG FBXO43 PKMYT1 SKA3 NCAPH SKA2 CCNB1 RACGAP1 FAM83D MAP2K6 XRCC2 PLK1 FANCA PA2G4 FANCB ZWINT ANLN POLA1 TPX2 KIF18A UBE2S CDK4 SASS6 TP73 NCAPG2 KIF11 BRCA2 KIF15 EXO1 NUF…	0	0	UP in siEF&EEF	5515	protein binding	1.2241e-26	1038	1778	0.583	CHIC2 AVIL SCAMP5 TMEM8B GSTK1 GABARAPL1 MEF2C CXADR UNC5B HPCAL1 RFX3 UNC5C FRS3 HSPG2 SIGIRR PRKAR1A DDIT3 ORAI2 TXNIP OPTN ATF3 SKAP2 ZBTB8A COL13A1 FLII HHLA3 TPRG1L AGAP2 PDGFA MTMR9 RNF215 EPB41L1 PRKAR2B PDGFC MYO6 KCNMB4 ABCA1 JUN JUP FN1 EIF2AK3 BTBD11 L1CAM GRIN2C PBX1 AIF1L GRIN2D COL1A1 ABTB1 PPFIBP1 AGO4 HYOU1 FXYD5 HRK ACHE ARF4 HEXA LRRC3 SHB LITAF TRIOBP BBC3 LRRC1 PANX2 TUBA1A NE…	0	0
UP in EWS	51239	regulation of multicellular organismal process	1.6952e-08	64	437	0.146	ERRFI1 NRP1 BTG1 FLT1 SERPINE2 SERPINE1 ADM ETS1 AMOT BOC TIMP2 CASP1 SOX8 CCN2 CCN1 NKX3-1 KLF10 CXADR TNFRSF12A ANXA3 ISLR2 NGF DKK1 ASPN RHOB GREM1 VGF TNNT1 IL1B IRF1 TLR3 HBEGF TLR2 OPRD1 PTGER4 SDC4 EPAS1 LAMA4 CEBPG EBI3 PDGFB PDGFA IL20RB BCL10 PTGS2 FOXO3 HDAC9 THBS1 APOLD1 HMOX1 TAC1 DRD4 JUN TGFB2 ANGPT2 LIF VEGFC KLF2 NR4A2 MAFF BCL3 BHLHE40 F2RL1 CD24	0	0	UP in siEF	31012	extracellular matrix	7.9883e-30	100	1392	0.071	SPON2 COL16A1 SPARC SERPINE2 SERPINE1 COL12A1 TNC OLFML2A FGF1 LOXL1 LGALS3 EFEMP2 CCN3 CCN2 POSTN WNT5B OMD P3H1 NPNT HSPG2 CCDC80 LOX COL4A2 COL4A1 SPARCL1 COL8A1 LTBP4 LPL FBLN1 LTBP3 NID1 LTBP1 NID2 ADAMTS10 FBLN5 ADAMTS15 PSAP WNT3 TGFB2 FN1 COL1A1 COL1A2 COL5A1 COL5A3 OGN COL5A2 COL9A3 COL9A2 TGFBI FBN1 COL18A1 HAPLN3 ADAMTS3 TIMP2 EMILIN3 ADAMTS9 ADAMTS7 ANXA2 MMP2 BGN F3 MMP10 ASPN MMP11 …	0	0	DN in EWS	3824	catalytic activity	6.0982e-05	116	267	0.434	PI4K2B MPI HDDC3 TXNDC17 TM7SF2 ABHD11 PAPOLA PSKH1 GAMT PCYT2 ACOT11 USP2 ATP11C OCRL LIG3 P3H3 TUBA4A GTPBP3 ACLY OBSCN SOAT1 KIF16B EEF1A2 CMPK1 PADI2 FKBP4 CES2 GCDH PFKFB4 ABHD3 TRANK1 PLA2G3 HTRA2 TRMT2B AK7 ACAT2 DHX33 B4GALNT1 MYH10 MAP2K5 FDFT1 GSTM4 FDPS HSPA8 GSTM2 MLKL RASL10B SRD5A1 IDH1 GGCT SQLE FASN PLCH1 DHCR7 SETD7 MAST1 CHD3 CHTF18 PIK3CG KHK DHTKD1 HK1 GMPPB GYS1 RAC3 POLL MAN…	0	0	DN in siEF	278	mitotic cell cycle	1.5444e-32	88	873	0.1	RB1 DCLRE1A ERCC6L DSCC1 NCAPG2 CCNF BUB1B KIF11 SMC4 KIF15 SMC2 CDC20 CCND1 PTTG1 PSMD3 NUF2 PBK RCC1 OIP5 KNTC1 FBXO5 GTSE1 POLE DLGAP5 CEP55 LRRCC1 HELLS TIPIN DDX11 UBE2E1 HAUS4 KIF23 HAUS6 KIF22 KNL1 SMC1A CKAP5 CDC25A CIT SGO1 ASPM RP1 DBF4 ESPL1 INCENP KIFC1 TIMELESS BIRC5 KIF2C KIF20B ANAPC1 BLM PSMD12 CDCA2 CDCA3 CDCA5 NCAPG PKMYT1 SKA3 CENPA NCAPH AURKB AURKA SKA2 CCNB1 POLD1 E2F1 FAM83…	0	0	UP in siEF&EEF	9653	anatomical structure morphogenesis	1.9313e-26	248	1778	0.139	ERRFI1 ENO3 FGFRL1 EDNRA ALCAM ZMIZ1 BSG SOX9 CCN1 SOX6 JUNB IER3 CDON ACVR1 EPHA4 UNC5B SOX13 UNC5C PRKCA MAPK8IP3 HSPG2 BTD PRKAR1A TEP1 PARD3 NINJ1 HOXB4 ULK2 HOXB3 ULK1 HOXB2 HOXB8 OBSL1 HOXB7 FREM2 HOXB6 EPHA2 HOXB5 NUMBL COL13A1 CRABP2 TSHZ3 EPAS1 SDC2 STXBP1 TSHZ1 PDGFA TWIST1 BCL10 SGPL1 CHST11 RDH10 MYO6 HMOX1 APOE BBS2 WWTR1 FIS1 JUN FZD2 FZD5 MCAM FZD6 FN1 LIF L1CAM PBX1 DCLK1 COL1A1 E…	0	0
UP in EWS	51270	regulation of cellular component movement	2.3454e-08	27	437	0.061	NRP1 FLT1 SERPINE2 LAMA4 SERPINE1 PDGFB PDGFA PTGS2 HDAC9 ETS1 THBS1 ICAM1 AMOT KDR HMOX1 TAC1 PDGFRA TGFB2 ANGPT2 ANXA3 VEGFC GREM1 F2RL1 CDH13 TRIB1 HBEGF TLR2	0	0	UP in siEF	5578	proteinaceous extracellular matrix	5.0415e-26	90	1392	0.064	COL18A1 SPON2 COL16A1 SPARC COL12A1 TNC FGF1 HAPLN3 LOXL1 LGALS3 EFEMP2 ADAMTS3 TIMP2 EMILIN3 CCN2 ADAMTS9 ADAMTS7 POSTN WNT5B ANXA2 MMP2 OMD BGN P3H1 NPNT HSPG2 MMP10 ASPN MMP11 VCAN CCDC80 COL2A1 LOX COL4A2 COL4A1 COL6A2 MMP17 COL6A1 ANGPTL2 VWA1 COL6A3 SPARCL1 COL8A1 ITGA6 MATN3 MATN2 LAMA5 TNXB COL11A1 LAMA4 COL11A2 NTN4 LTBP4 FBLN1 PRELP LTBP3 NID1 LTBP1 NID2 ADAMTS10 THSD4 FBLN5 ADAMTS15 GP…	0	0	DN in EWS	16125	sterol metabolic process	0.00011074	11	267	0.041	SQLE FDPS MVK SOAT1 HMGCS1 CYP51A1 MVD DHCR7 ACAT2 FDFT1 TM7SF2	0	0	DN in siEF	51301	cell division	1.744e-32	80	873	0.091	RB1 DCLRE1A ERCC6L AHCTF1 NCAPG2 CCNF BUB1B KIF11 BRCA2 SMC4 SMC2 CDC20 CCND3 CCND1 PTTG1 NUF2 RCC1 OIP5 KNTC1 FBXO5 CEP55 LRRCC1 HELLS TIPIN BORA LIG1 HAUS4 KIF23 HAUS6 LIG3 KNL1 SMC1A POU3F2 CKAP5 CDC25A CIT SGO1 ASPM RP1 ESPL1 INCENP KIFC1 TIMELESS BIRC5 KIF2C KIF20B ANAPC1 CDCA2 CDCA3 CDCA5 NCAPG SKA3 NCAPH AURKB AURKA SKA2 PARD6B CCNB1 RACGAP1 FAM83D BUB1 SPAG5 ZBTB16 PLK1 FANCB ZWINT CENPE …	0	0	UP in siEF&EEF	48513	organ development	1.5805e-21	312	1778	0.175	ERRFI1 OXTR F11R ENO3 FGFRL1 EDNRA ZMIZ1 BSG CREB3L2 SOX8 SOX9 CCN1 SOX6 JUNB SOX4 ACVR1 MEF2C CXADR ZNF160 SERPINF1 RFX3 UNC5C PRKCA MAPK8IP3 HSPG2 BCAM MYL6 BTD HOXB9 PRKAR1A TEP1 DDIT3 NINJ1 HOXB4 TXNIP HOXB3 TAGLN2 ULK1 HOXB2 ATP6V0D1 HOXB8 OBSL1 HOXB7 ZFPM1 FREM2 HOXB6 EPHA2 HOXB5 IGSF8 NUMBL COL13A1 CRABP2 TSHZ3 EPAS1 TSHZ1 SHOX2 PDGFA TWIST1 BCL10 PCDH18 UGCG SGPL1 CHST11 RDH10 MYO6 HMOX1 …	0	0
UP in EWS	30334	regulation of cell migration	5.33e-08	25	437	0.057	FLT1 SERPINE2 LAMA4 SERPINE1 PDGFB PDGFA PTGS2 HDAC9 THBS1 ICAM1 AMOT KDR HMOX1 TAC1 PDGFRA TGFB2 ANGPT2 ANXA3 VEGFC GREM1 F2RL1 CDH13 TRIB1 HBEGF TLR2	0	0	UP in siEF	48513	organ development	1.964e-24	268	1392	0.192	ERRFI1 OXTR SERPINE1 F11R AQP1 EDNRA CREB3L2 KDR SOX8 CCN2 SOX9 CCN1 SOX4 MEF2C CXADR UNC5C HSPG2 DKK1 EREG DKK3 BCAM MYL6 BTD HOXB9 DDIT3 NINJ1 TXNIP COL8A1 ULK1 HOXB8 OBSL1 CRABP2 TSHZ3 EPAS1 TSHZ1 PDGFB PDGFA BCL10 PPL PCDH18 UGCG SGPL1 CHST11 S100A16 RDH10 MYO6 HMOX1 APOE JUN FZD2 JUP FZD6 EIF2AK3 FN1 LIF DCLK1 COL1A1 BST1 COL1A2 SDC1 SNAI2 ID3 COL9A3 NRP1 COL18A1 PCSK1 PTPRU TGFB1I1 PTPRO CT…	0	0	DN in EWS	6066	alcohol metabolic process	0.00021523	22	267	0.082	FDPS PCYT1B PFKFB4 MVK HMGCS1 CYP51A1 ACAT2 KHK TM7SF2 DHTKD1 HK1 SQLE GYS1 GNPDA1 SOAT1 PPP1R1A MVD SLC25A10 DHCR7 MAN2C1 ALDOA FDFT1	0	0	DN in siEF	280	nuclear division	1.2949e-31	68	873	0.077	DCLRE1A ERCC6L DSCC1 NCAPG2 CCNF BUB1B KIF11 SMC4 KIF15 SMC2 CDC20 PTTG1 NUF2 PBK OIP5 KNTC1 FBXO5 DLGAP5 CEP55 LRRCC1 HELLS TIPIN DDX11 HAUS4 KIF23 HAUS6 KIF22 KNL1 SMC1A CKAP5 CDC25A CIT SGO1 ASPM RP1 ESPL1 INCENP KIFC1 TIMELESS BIRC5 KIF2C ANAPC1 CDCA2 CDCA3 CDCA5 NCAPG PKMYT1 SKA3 NCAPH AURKB AURKA SKA2 CCNB1 FAM83D BUB1 SPAG5 PLK1 ZWINT CENPE ANLN TPX2 CENPF KIF18A NCAPD2 NCAPD3 SPC24 SPC25 …	0	0	UP in siEF&EEF	65007	biological regulation	9.5924e-19	882	1778	0.496	ZNF296 AVIL SCAMP5 MLYCD TMEM8B ZNF287 MEF2C CXADR UNC5B RFX3 UNC5C FRS3 SIGIRR MYL5 PRKAR1B PRKAR1A DDIT3 DDIT4 RBP1 TXNIP OPTN ATF3 SKAP2 ZBTB8A CRABP2 FLII SHOX2 AGAP2 PDGFA SLC5A3 PRKAR2B RDH10 PDGFC MYO6 KCNMB4 GTF2IRD2B ABCA1 JUN JUP FN1 EIF2AK3 PBX3 PBX4 L1CAM GRIN2C PBX1 GRIN2D COL1A1 AGO4 FXYD5 TMEM9B HRK ACHE ARF4 ZNF251 ZNF490 JRKL SHB LITAF TRIOBP BBC3 HEY1 NEFL TSPO NEFM SH3BGRL3 APP…	0	0
UP in EWS	1525	angiogenesis	5.33e-08	21	437	0.048	NRP1 FOXC2 JUN TGFB2 FLT1 CXCL8 TNFRSF12A EPAS1 TNFAIP2 PDGFA VEGFC THBS1 APOLD1 KLF5 KDR HMOX1 MMP19 COL8A1 CDH13 CCN2 CCN1	0	0	UP in siEF	9653	anatomical structure morphogenesis	1.964e-24	205	1392	0.147	ERRFI1 SPON2 SERPINE1 AQP1 EDNRA ALCAM KDR CCN2 SOX9 CCN1 IER3 CDON EPHA4 UNC5B UNC5C HSPG2 DKK1 EREG DKK3 BTD NINJ1 ULK2 COL8A1 ULK1 HOXB8 OBSL1 CRABP2 TSHZ3 EPAS1 SDC2 TSHZ1 PDGFB PDGFA BCL10 SGPL1 CHST11 RDH10 MYO6 HMOX1 APOE JUN FZD2 FZD5 MCAM FZD6 FN1 LIF L1CAM DCLK1 COL1A1 COL1A2 SDC1 ID3 NRP1 COL18A1 PTPRU TGFB1I1 PTPRO CTSZ PTPRJ ADM SHB LFNG HEY1 TNFRSF12A ANXA2 ANXA3 GAA STRADB MST1 BGN…	0	0	DN in EWS	16740	transferase activity	0.00025055	50	267	0.187	PI4K2B SETD7 MAST1 PIK3CG KHK HK1 GMPPB GYS1 PAPOLA RAC3 POLL IKBKE PSKH1 GAMT PRMT6 PCYT1B PCYT2 HMGCS1 PRMT3 ELOVL6 TYK2 PARP8 ACLY OBSCN SOAT1 CMPK1 MVD PFKFB4 MVK TRMT2B AK7 ACAT2 B4GALNT1 MAP2K5 FDFT1 MAPK3 GSTM4 SUZ12 FDPS GSTM2 MLKL GALNT3 MMAB HS3ST4 GGCT GSTA4 FASN PNPLA3 CAMK1 POLR3K	0	0	DN in siEF	7067	mitosis	1.2949e-31	68	873	0.077	DCLRE1A ERCC6L DSCC1 NCAPG2 CCNF BUB1B KIF11 SMC4 KIF15 SMC2 CDC20 PTTG1 NUF2 PBK OIP5 KNTC1 FBXO5 DLGAP5 CEP55 LRRCC1 HELLS TIPIN DDX11 HAUS4 KIF23 HAUS6 KIF22 KNL1 SMC1A CKAP5 CDC25A CIT SGO1 ASPM RP1 ESPL1 INCENP KIFC1 TIMELESS BIRC5 KIF2C ANAPC1 CDCA2 CDCA3 CDCA5 NCAPG PKMYT1 SKA3 NCAPH AURKB AURKA SKA2 CCNB1 FAM83D BUB1 SPAG5 PLK1 ZWINT CENPE ANLN TPX2 CENPF KIF18A NCAPD2 NCAPD3 SPC24 SPC25 …	0	0	UP in siEF&EEF	50789	regulation of biological process	1.3438e-18	841	1778	0.473	ZNF296 AVIL SCAMP5 MLYCD TMEM8B ZNF287 MEF2C CXADR UNC5B RFX3 UNC5C FRS3 SIGIRR MYL5 PRKAR1B PRKAR1A DDIT3 DDIT4 RBP1 TXNIP OPTN ATF3 SKAP2 ZBTB8A CRABP2 FLII SHOX2 AGAP2 PDGFA SLC5A3 PRKAR2B PDGFC MYO6 KCNMB4 GTF2IRD2B ABCA1 JUN JUP FN1 EIF2AK3 PBX3 PBX4 L1CAM GRIN2C PBX1 GRIN2D COL1A1 AGO4 FXYD5 TMEM9B HRK ACHE ARF4 ZNF251 ZNF490 JRKL SHB LITAF TRIOBP BBC3 HEY1 NEFL TSPO NEFM SH3BGRL3 APPL2 DUS…	0	0
UP in EWS	51272	positive regulation of cellular component movement	5.33e-08	20	437	0.045	PDGFRA TGFB2 FLT1 ANXA3 SERPINE1 PDGFB PDGFA VEGFC PTGS2 HDAC9 ETS1 THBS1 ICAM1 AMOT KDR F2RL1 CDH13 TAC1 HBEGF TLR2	0	0	UP in siEF	5576	extracellular region	2.6338e-23	289	1392	0.207	SPON2 SPARC SERPINE2 SERPINE1 COL12A1 SPATA20 ANTXR2 ICAM1 LGALS3 ISLR CCN3 DHRS4L2 CCN2 CCN1 CHGB IL15RA CXADR OMD HLA-C HSD11B1L P3H1 HSPG2 DKK1 EREG DKK3 CCDC80 BTD SPARCL1 SERPING1 COL8A1 NBL1 EPHA3 CFD PTGFR EBI3 PDGFB PDGFA ADAMTS10 ADAMTS15 ARSJ STC2 PDGFC PENK S100A13 HMOX1 ARSI APOE A2M TNFSF18 EDEM2 FN1 LIF VASN COL1A1 GNPTG COL1A2 TCN2 TNFSF4 ITGBL1 COL9A3 COL9A2 NRP1 COL18A1 PCSK1 CCD…	0	0	DN in EWS	44281	small molecule metabolic process	0.00031339	44	267	0.164	SLC23A2 PFKFB4 MVK HAAO TCIRG1 SLC7A2 ACAT2 KHK TM7SF2 DHTKD1 HK1 GYS1 SLC19A3 MAN2C1 FDFT1 GAMT PRMT6 FDPS PCYT1B AMN ELOVL4 HMGCS1 PTGES2 MMAB IDH1 ACOT11 CYP51A1 ATP11C ELOVL6 SQLE ACLY HPDL GNPDA1 SOAT1 PPP1R1A SCD FASN PNPLA3 CMPK1 PADI2 MVD SLC25A10 DHCR7 ALDOA	0	0	DN in siEF	6259	DNA metabolic process	1.466e-30	100	873	0.114	DCLRE1B DCLRE1A DSCC1 NUDT1 BCCIP PTTG1 EME1 TIPIN LIG1 LIG3 ESCO2 CDC25A NEIL3 DKC1 FANCD2 DNA2 BLM DNMT1 PRKDC PHB RAD51AP1 BRIP1 TERT ORC1 CLSPN FANCI CDT1 FANCM BCL11B XRCC2 EAF2 FANCA FANCC IGF1 FANCB FANCG POLA1 NASP UBE2N CYCS TP73 TOP2A FEN1 MCM7 MCM10 ADRA1D BRCA1 HMGB1 BRCA2 CHTF18 CHAF1B CHAF1A EXO1 TK1 POLE RFC5 PRMT6 HELLS SHPRH RFC3 RFC4 RFC2 CAD RAD23A KIF22 SMC1A DBF4 MCM3 MCM4 MC…	0	0	UP in siEF&EEF	50794	regulation of cellular process	3.9919e-18	804	1778	0.452	ZNF296 AVIL SCAMP5 MLYCD TMEM8B ZNF287 MEF2C CXADR UNC5B RFX3 UNC5C FRS3 SIGIRR PRKAR1B PRKAR1A DDIT3 DDIT4 RBP1 TXNIP OPTN ATF3 SKAP2 ZBTB8A CRABP2 FLII SHOX2 AGAP2 PDGFA PRKAR2B PDGFC MYO6 KCNMB4 GTF2IRD2B ABCA1 JUN JUP FN1 EIF2AK3 PBX3 PBX4 L1CAM PBX1 GRIN2D COL1A1 AGO4 FXYD5 TMEM9B HRK ACHE ARF4 ZNF251 ZNF490 JRKL SHB LITAF TRIOBP BBC3 HEY1 NEFL NEFM SH3BGRL3 APPL2 DUSP4 APC2 METRN SPHK1 RRAS…	0	0
UP in EWS	40017	positive regulation of locomotion	5.33e-08	20	437	0.045	PDGFRA TGFB2 FLT1 CXCL8 ANXA3 SERPINE1 PDGFB PDGFA VEGFC PTGS2 HDAC9 THBS1 ICAM1 AMOT KDR F2RL1 CDH13 TAC1 HBEGF TLR2	0	0	UP in siEF	7155	cell adhesion	7.2965e-23	141	1392	0.101	SPON2 COL16A1 CLSTN3 COL12A1 TNC F11R CELSR1 CELSR3 ICAM1 LOXL2 CDH6 ISLR ALCAM CDH2 PLXNC1 CCN2 SOX9 CCN1 TMEM8B CDON POSTN CXADR ACTN1 OMD LMO7 PCDHA12 NPNT HSPG2 BCAM CLDN4 ADAM15 NINJ1 ADAM12 CERCAM COL8A1 ROR2 AJUBA FBLIM1 NTM SDC3 AEBP1 NID1 LPP PCDH18 NID2 FBLN5 BCL2L11 PDZD2 NPHP1 LPXN ABL2 IGFBP7 CADM4 JUP MCAM FN1 PARVA PARVB L1CAM PPFIBP1 BMP1 PCDHB2 COL5A1 PTK7 COL5A3 ITGA10 ITGA11 SS…	0	0	DN in EWS	6629	lipid metabolic process	0.00070662	31	267	0.116	ACSS2 MVK PLA2G3 HSD17B7 LRP8 ACAT2 PIK3CG TM7SF2 B4GALNT1 FDFT1 FDPS PCYT1B AMN PCYT2 ELOVL4 HMGCS1 PTGES2 SRD5A1 ACOT11 CYP51A1 ELOVL6 OCRL SQLE ACLY SOAT1 SCD FASN PNPLA3 PLCH1 MVD DHCR7	0	0	DN in siEF	48285	organelle fission	1.466e-30	68	873	0.077	DCLRE1A ERCC6L DSCC1 NCAPG2 CCNF BUB1B KIF11 SMC4 KIF15 SMC2 CDC20 PTTG1 NUF2 PBK OIP5 KNTC1 FBXO5 DLGAP5 CEP55 LRRCC1 HELLS TIPIN DDX11 HAUS4 KIF23 HAUS6 KIF22 KNL1 SMC1A CKAP5 CDC25A CIT SGO1 ASPM RP1 ESPL1 INCENP KIFC1 TIMELESS BIRC5 KIF2C ANAPC1 CDCA2 CDCA3 CDCA5 NCAPG PKMYT1 SKA3 NCAPH AURKB AURKA SKA2 CCNB1 FAM83D BUB1 SPAG5 PLK1 ZWINT CENPE ANLN TPX2 CENPF KIF18A NCAPD2 NCAPD3 SPC24 SPC25 …	0	0	UP in siEF&EEF	23052	signaling	2.3417e-16	455	1778	0.255	PATJ TRIO ABAT EPS8 GPR176 ALCAM GJA3 NAMPT HOMER3 UNC5B PRKCD DAPK3 UNC5C PRKCA FRS3 SIGIRR BCAM PRKAR1B PRKAR1A TEP1 DDIT3 PARD3 TXNIP MAML3 OPTN SKAP2 CFD CRABP2 AGAP2 PDGFA BCL10 PRKAR2B PDGFC MYO6 HMOX1 KCNMB4 S100A11 S100A10 ABCA1 CDK18 JUN FZD2 DMPK FZD5 HOMER2 FZD7 FZD6 EIF2AK3 FZD8 NFATC1 L1CAM GRIN2C GRIN2D CYLD GIPC1 SNAI2 HBP1 ACHE ARF4 RARG TGFB1I1 ADM SHB GLI2 ING4 HEY1 APPL2 DLGAP4…	0	0
UP in EWS	40012	regulation of locomotion	8.4237e-08	26	437	0.059	FLT1 CXCL8 SERPINE2 LAMA4 SERPINE1 PDGFB PDGFA PTGS2 HDAC9 THBS1 ICAM1 AMOT KDR HMOX1 TAC1 PDGFRA TGFB2 ANGPT2 ANXA3 VEGFC GREM1 F2RL1 CDH13 TRIB1 HBEGF TLR2	0	0	UP in siEF	22610	biological adhesion	7.736e-23	141	1392	0.101	SPON2 COL16A1 CLSTN3 COL12A1 TNC F11R CELSR1 CELSR3 ICAM1 LOXL2 CDH6 ISLR ALCAM CDH2 PLXNC1 CCN2 SOX9 CCN1 TMEM8B CDON POSTN CXADR ACTN1 OMD LMO7 PCDHA12 NPNT HSPG2 BCAM CLDN4 ADAM15 NINJ1 ADAM12 CERCAM COL8A1 ROR2 AJUBA FBLIM1 NTM SDC3 AEBP1 NID1 LPP PCDH18 NID2 FBLN5 BCL2L11 PDZD2 NPHP1 LPXN ABL2 IGFBP7 CADM4 JUP MCAM FN1 PARVA PARVB L1CAM PPFIBP1 BMP1 PCDHB2 COL5A1 PTK7 COL5A3 ITGA10 ITGA11 SS…	0	0	DN in EWS	5737	cytoplasm	0.0010438	151	267	0.565	PI4K2B SLC23A2 TUSC3 MPI TMEM97 CISD3 TXNDC17 TM7SF2 SYNPR ARL6IP5 PAPOLA RCC1 KPNA4 SLC25A42 PSKH1 NUP214 GAMT MBNL1 COG6 ANAPC7 TPM4 ACOT11 USP2 ALG14 EPDR1 ANK2 OCRL P3H3 TUBA4A GTPBP3 ACLY OBSCN SOAT1 EWSR1 EEF1A2 CMPK1 PADI2 FKBP4 CES2 PFN2 GCDH PFKFB4 HSPA4L HTRA2 MRPL10 ACAT2 CACNA1G RRP7A B4GALNT1 MYH10 FDFT1 GSTM4 FDPS HSPA8 GSTM2 SRD5A1 IDH1 HMGA1 IFI44 GGCT SQLE ANLN FASN NDUFAF3 PLCH1…	0	0	DN in siEF	5694	chromosome	7.3714e-29	92	873	0.105	RB1 ERCC6L AHCTF1 RIF1 MCM7 SUV39H1 DSCC1 HJURP BUB1B HMGB1 MKI67 SMC4 SMC2 HMGN5 SALL1 XPO1 NUF2 RCC1 OIP5 KNTC1 RFC5 HELLS SHPRH RFC3 TIPIN RFC4 RFC2 BAZ1A KIF22 KNL1 RANGAP1 SMC1A RNF40 SGO1 INCENP FANCD2 TCP1 MCM3 TIMELESS BIRC5 KIF2C ITGB3BP ASF1B MCM2 PIF1 BLM DNMT1 PCNA PRIM1 NCAPG SKA3 MACROH2A2 CENPA NCAPH AURKB SKA2 NOL6 POLD3 PURB CCNB1 SLX4 TERT ORC1 RAD54L CLSPN BUB1 DYNC1I1 FANCI SU…	0	0	UP in siEF&EEF	5737	cytoplasm	6.0771e-16	939	1778	0.528	CHIC2 AVIL ALKBH7 ZFYVE1 SCAMP5 LACTB COMTD1 DPYSL4 MLYCD TMEM8B GSTK1 GABARAPL1 MYL5 EML6 PRKAR1B ASPHD1 PRKAR1A DDIT3 ETHE1 DDIT4 RBP1 TXNIP ASPHD2 OPTN SKAP2 NLRX1 MTMR3 CRABP2 FLII TPRG1L AGAP2 PDGFA MTMR9 PLA2G6 DYNC2LI1 EPB41L1 PRKAR2B RDH10 PDGFC MYO6 ABCA1 JUN JUP FUCA1 ABCA3 EDEM2 FN1 EIF2AK3 PBX3 LARP6 PBX1 AIF1L COL1A1 ABTB1 AGO4 SFXN3 HYOU1 ACHE ARF4 ZNF251 HEXA SHB PIGV LITAF TRIOBP …	0	0
UP in EWS	2237	response to molecule of bacterial origin	8.4237e-08	19	437	0.043	JUN SERPINE1 LY96 ADM BCL10 FOS VLDLR PTGS2 NGF DCN SOCS1 IRAK2 IL1B CYP1A1 CASP1 TRIB1 CD24 TAC1 TLR2	0	0	UP in siEF	5615	extracellular space	7.1832e-21	141	1392	0.101	CSF1 SERPINE2 SERPINE1 COL12A1 TNC LOXL4 PLAT FGF1 CXCL14 LOXL1 ICAM1 LOXL2 CXCL16 SMR3B PLAU LEPR CCN2 IL13RA2 IL6R IL15RA WNT5B IGFBP5 IGFBP4 IGFBP3 IGFBP2 PCOLCE VASH1 HSPG2 PGF EREG DKK3 BTD LOX SCG2 CFD EBI3 HTRA1 LTBP4 PDGFA LPL FBLN1 AEBP1 LTBP3 EFNA5 FBLN5 PCSK1N PDGFC PSAP S100A13 HMOX1 CYTL1 IGFBP7 APOE IGFBP6 A2M TAC1 WNT3 TNFSF18 FN1 LIF ISG15 COL1A1 COL1A2 BMP1 TCN2 TNFSF4 OGN ALPL T…	0	0	DN in EWS	8299	isoprenoid biosynthetic process	0.001697	5	267	0.018	FDPS MVK HMGCS1 MVD FDFT1	0	0	DN in siEF	6260	DNA replication	2.5049e-28	58	873	0.066	TOP2A FEN1 MCM7 DSCC1 MCM10 BRCA2 CHTF18 CHAF1B CHAF1A TK1 POLE RFC5 RFC3 TIPIN RFC4 LIG1 RFC2 LIG3 CDC25A DBF4 DKC1 MCM3 MCM4 MCM5 MCM6 DNA2 DTL MCM2 BLM PCNA PRIM1 PHB LIN9 TYMS POLD3 CDC45 TERT ORC1 TGS1 POLD1 CLSPN GINS1 CDT1 GINS2 POLQ RRM1 RRM2 EGF GINS4 IGF1 SSRP1 FANCB TICRR POLA1 CENPF RAD50 NASP POLE2	0	0	UP in siEF&EEF	7399	nervous system development	2.1082e-15	209	1778	0.117	OXTR SERPINE2 AVIL CYB5D2 ALCAM DPYSL4 DPF1 SOX8 SOX9 SOX6 EPHA4 MEF2C UNC5B SERPINF1 DAPK3 UNC5C PRKCA MAPK8IP3 BTD TEP1 PARD3 NINJ1 ULK2 HOXB3 KCTD11 ULK1 HOXB2 ATP6V0D1 HOXB8 EPHA2 IGSF8 NUMBL SDC2 STXBP1 SHOX2 TWIST1 BCL10 SLC5A3 PCDH18 PDGFC MYO6 TSPAN2 APOE BBS2 FZD2 FZD5 FZD7 FZD6 LIF FZD8 L1CAM PBX1 DCLK1 RNF103 ID3 ITM2B CDKN1C ROBO2 ACHE NRP1 ARF4 NRP2 ADM JRKL VLDLR PTPRG GLI2 HEY1 NCS…	0	0
UP in EWS	70482	response to oxygen levels	8.4237e-08	21	437	0.048	PDGFRA TGFB2 FLT1 ANGPT2 VCAM1 EPAS1 PDGFB ITPR1 PDGFA ADM VLDLR THBS1 APOLD1 NR4A2 DDIT4 CYP1A1 CASP1 HMOX1 CCN2 CD24 TLR2	0	0	UP in siEF	1568	blood vessel development	7.9359e-21	75	1392	0.053	NRP1 COL18A1 FLT1 CXCL8 TNFAIP2 PLAT PTPRJ SHB FGF1 EDNRA CDH2 PLAU KDR LEPR ITGB8 ITGAV CCN2 CCN1 TGM2 ITGA4 TNFRSF12A ANXA2 LMO4 SPHK1 MMP2 LMO2 BGN HSPG2 PGF TGFBR1 EREG TGFBR2 MMP14 CEACAM1 ADAM15 LOX COL4A1 CDH13 COL8A1 MFGE8 SCG2 CD44 FOXC2 LAMA5 NOTCH3 FOXC1 SEMA3C EPAS1 LAMA4 PDGFA THBS1 APOLD1 FOXO1 ZFP36L1 SOCS3 SGPL1 HMOX1 APOE TCF7L2 JUN TGFB2 PRRX1 FN1 LIF VEGFC SMAD7 COL1A1 MYO1E CO…	0	0	DN in EWS	17076	purine nucleotide binding	0.001697	53	267	0.198	PI4K2B MAST1 CHD3 CHTF18 PIK3CG KHK HK1 GMPPB ARL5B PAPOLA RAC3 IKBKE PSKH1 AMN HSP90AA1 ATP11C LIG3 TYK2 RAB33A TUBA4A GTPBP3 ACLY OBSCN MYH3 KIF16B EEF1A2 CMPK1 RHOU MVD FKBP4 ARF6 GCDH PFKFB4 ACSS2 MVK HSPA4L PALM3 TRANK1 ADCY7 AK7 DHX33 MYH10 MAP2K5 MAPK3 HSPA8 MLKL MMAA RASL10B MMAB SQLE CAMK1 HSPA1B HSPA1A	0	0	DN in siEF	44427	chromosomal part	5.0373e-28	83	873	0.095	RB1 ERCC6L RIF1 MCM7 SUV39H1 DSCC1 HJURP BUB1B MKI67 SMC4 SMC2 HMGN5 SALL1 XPO1 NUF2 RCC1 OIP5 KNTC1 RFC5 HELLS SHPRH RFC3 TIPIN RFC4 RFC2 KIF22 KNL1 RANGAP1 SMC1A SGO1 INCENP TCP1 MCM3 TIMELESS BIRC5 KIF2C ITGB3BP ASF1B MCM2 PIF1 BLM DNMT1 PCNA PRIM1 NCAPG SKA3 MACROH2A2 CENPA NCAPH AURKB SKA2 POLD3 PURB CCNB1 SLX4 TERT ORC1 RAD54L BUB1 DYNC1I1 SUZ12 CENPU SPAG5 PLK1 EAF2 FANCC ZWINT CENPE POLA1…	0	0	UP in siEF&EEF	48869	cellular developmental process	1.4279e-14	278	1778	0.156	SERPINE2 SPATA20 F11R LGALS3 EDNRA ALCAM ZMIZ1 CREB3L2 SOX8 SOX9 CCN1 SOX6 JUNB SOX4 CDON ACVR1 EPHA4 MEF2C CXADR UNC5B SERPINF1 DAPK3 RFX3 UNC5C PRKCA MAPK8IP3 TEP1 BIN1 PARD3 TXNIP ULK2 KCTD11 ULK1 OBSL1 HOXB7 EPHA2 HOXB5 NUMBL COL13A1 EPAS1 SDC2 STXBP1 TWIST1 SGPL1 CHST11 RDH10 MYO6 TSPAN2 APOE BBS2 WWTR1 FIS1 JUN FZD2 FZD5 GADD45B FZD7 FN1 EIF2AK3 LIF RAB27A FZD8 L1CAM PBX1 DCLK1 NFATC4 COL1A…	0	0
UP in EWS	30335	positive regulation of cell migration	8.4237e-08	19	437	0.043	PDGFRA TGFB2 FLT1 ANXA3 SERPINE1 PDGFB PDGFA VEGFC PTGS2 HDAC9 THBS1 ICAM1 AMOT KDR F2RL1 CDH13 TAC1 HBEGF TLR2	0	0	UP in siEF	1944	vasculature development	1.1495e-20	76	1392	0.054	NRP1 COL18A1 ERRFI1 FLT1 CXCL8 TNFAIP2 PLAT PTPRJ SHB FGF1 EDNRA CDH2 PLAU KDR LEPR ITGB8 ITGAV CCN2 CCN1 TGM2 ITGA4 TNFRSF12A ANXA2 LMO4 SPHK1 MMP2 LMO2 BGN HSPG2 PGF TGFBR1 EREG TGFBR2 MMP14 CEACAM1 ADAM15 LOX COL4A1 CDH13 COL8A1 MFGE8 SCG2 CD44 FOXC2 LAMA5 NOTCH3 FOXC1 SEMA3C EPAS1 LAMA4 PDGFA THBS1 APOLD1 FOXO1 ZFP36L1 SOCS3 SGPL1 HMOX1 APOE TCF7L2 JUN TGFB2 PRRX1 FN1 LIF VEGFC SMAD7 COL1A1 M…	0	0	DN in EWS	8152	metabolic process	0.0018398	123	267	0.46	SLC23A2 TUSC3 MPI TM7SF2 LSM11 PAPOLA PSKH1 GAMT MBNL1 PCYT2 ANAPC7 ACOT11 USP2 ATP11C OCRL LIG3 P3H3 GTPBP3 ACLY OBSCN SOAT1 CMPK1 PADI2 FKBP4 CES2 GCDH PFKFB4 CBFB HSPA4L TRANK1 PLA2G3 HTRA2 TRMT2B AK7 MRPL10 ACAT2 SLC19A3 B4GALNT1 MAP2K5 FDFT1 GSTM4 FDPS HSPA8 GSTM2 MLKL SRD5A1 IDH1 HMGA1 SQLE PPP1R1A FASN PLCH1 DHCR7 EIF4G2 RNF11 THRA MAST1 WDR4 TCIRG1 CHTF18 PIK3CG CYB561D2 KHK DHTKD1 HK1 GM…	0	0	DN in siEF	44428	nuclear part	5.8528e-27	195	873	0.223	RB1 POP1 TMEM97 MKI67 SMC2 CDC20 SOX2 CHEK2 MYB RCC1 EPC1 DPF3 FBXO5 WDHD1 TIPIN NUP210 ACTN2 DDX11 ARC GRWD1 PSME4 DNA2 KIF20B PIF1 NUP205 PAXIP1 PRKDC DHX33 TERT ALX4 NUP88 PPARGC1B TOE1 PLK4 NGFR CDT1 PRPF38A PLK1 EAF2 PA2G4 POLA1 CALM1 EZH2 TOP2A AHCTF1 CSRNP3 SUV39H1 BRCA1 KIF11 BRCA2 WDR43 CHAF1B CHAF1A XPO1 NDC1 TET1 CACYBP KIF23 BAZ1A INCENP TCP1 G2E3 PCNA PRIM1 HEATR1 PTGER3 FAAP24 CENPA…	0	0	UP in siEF&EEF	44444	cytoplasmic part	1.831e-14	670	1778	0.376	CHIC2 PATJ TRIO SERPINE2 ABAT ALKBH7 ZFYVE1 ENO3 GLS SCAMP5 LACTB COMTD1 CNST CREB3L4 CREB3L1 NAMPT CREB3L2 AP1S2 CYP1B1 MLYCD TMEM8B GSTK1 GABARAPL1 ACOT8 SERPINF1 PRKCD FNDC3B PRKCA IFT80 MYL5 BCAM PRKAR1B ASPHD1 PRKAR1A TEP1 BIN1 PARD3 ETHE1 TXNIP ASPHD2 OPTN RNF122 CFD NLRX1 FLII TPRG1L PDGFA BCL10 PLA2G6 PRDX5 CHST11 EPB41L1 PRKAR2B RDH10 PDGFC MYO6 ST3GAL4 SERPINH1 S100A13 ST3GAL5 HMOX1 ST3…	0	0
UP in EWS	48518	positive regulation of biological process	1.3522e-07	100	437	0.228	SERPINE2 MAML2 SERPINE1 ETS1 ICAM1 AMOT KDR SOX8 CCN2 CCN1 PHLDA1 IL13RA1 PDGFRA ISLR2 RUNX3 MID1 HOXB9 DDIT3 TXNIP SERPING1 TRIB3 TRIB1 ATF3 ABCG1 CDS1 SDC4 EPAS1 EBI3 PDGFB GLIS3 PDGFA IL20RB BCL10 FOXO3 APH1B IRAK2 PDGFD HMOX1 TAC1 PRODH DRD4 JUN TGFB2 VCAM1 TNFRSF9 LIF FOSL2 NR4A2 BCL3 JMY CYP1A1 CD24 HRK NRP1 CSRNP1 BTG1 FLT1 CXCL8 FHL1 CITED4 ADM BBC3 TNFSF13B BOC RAC2 CASP1 BOK KLF10 TNFRS…	0	0	UP in siEF	23052	signaling	1.3249e-17	377	1392	0.27	IFITM1 PATJ OXTR MAML2 CBLB GRPR IL27RA EPS8 GPR173 GPR176 EDNRA ALCAM RPS6KA2 KDR FBXO6 HOMER3 CCN2 CCN1 SOX4 CMKLR1 CDON IL15RA EPHA4 UNC5B PRKCD UNC5C BHLHA15 MAPK8IP2 ANK1 MAPK8IP1 EREG SIGIRR BCAM PRKAR1B RRAGC RRAGB DDIT3 TXNIP SPARCL1 ULK2 RIN3 ULK1 RIN2 OPTN EPHA3 SKAP2 PTGES CFD PTGFR CRABP2 EPAS1 CRABP1 PDGFB PDGFA PIK3R3 BCL10 SGPL1 APH1B MICAL1 STC2 PDGFC MYO6 PENK HMOX1 KCNMB4 APOE R…	0	0	DN in EWS	32553	ribonucleotide binding	0.0018398	51	267	0.191	PI4K2B MAST1 CHD3 CHTF18 PIK3CG KHK HK1 GMPPB ARL5B PAPOLA RAC3 IKBKE PSKH1 AMN HSP90AA1 ATP11C LIG3 TYK2 RAB33A TUBA4A GTPBP3 ACLY OBSCN MYH3 KIF16B EEF1A2 CMPK1 RHOU MVD FKBP4 ARF6 PFKFB4 ACSS2 MVK HSPA4L PALM3 TRANK1 ADCY7 AK7 DHX33 MYH10 MAP2K5 MAPK3 HSPA8 MLKL MMAA RASL10B MMAB CAMK1 HSPA1B HSPA1A	0	0	DN in siEF	5634	nucleus	2.6328e-26	406	873	0.465	RB1 IPO11 POP1 RAX TMEM97 SMC4 ALKBH8 SMC2 DCAF1 RAVER1 RAVER2 MYB WDHD1 NUP210 PRKCB DDX11 RFX2 PASK ISL1 WDR77 PSME4 ASF1B PIF1 NUP205 CDCA2 SRCAP CDCA4 PRKDC CDCA5 CDCA7 NCAPG NCAPH RRP7A TERT ALX4 NUP88 HMGXB3 PPARGC1B NR2C2AP NKX2-2 TOE1 PLK4 NGFR PRPF38A PLK1 NFATC3 NR0B1 PA2G4 FLI1 AGO2 REL HOXD4 HOXD3 HOXD8 ZNF135 EZH2 NCAPG2 HOXC12 GLI1 WDR43 CHAF1B CHAF1A NUF2 SH3BGRL2 DLGAP5 NDC1 TCF19…	0	0	UP in siEF&EEF	30154	cell differentiation	2.733e-14	271	1778	0.152	SERPINE2 SPATA20 F11R LGALS3 EDNRA ALCAM ZMIZ1 CREB3L2 SOX8 SOX9 CCN1 SOX6 JUNB SOX4 CDON ACVR1 EPHA4 MEF2C CXADR UNC5B SERPINF1 DAPK3 RFX3 UNC5C PRKCA MAPK8IP3 TEP1 BIN1 PARD3 TXNIP ULK2 KCTD11 ULK1 OBSL1 HOXB7 EPHA2 HOXB5 NUMBL COL13A1 EPAS1 SDC2 STXBP1 TWIST1 SGPL1 CHST11 RDH10 MYO6 TSPAN2 APOE BBS2 WWTR1 JUN FZD2 FZD5 GADD45B FZD7 FN1 EIF2AK3 LIF RAB27A FZD8 L1CAM PBX1 DCLK1 NFATC4 COL1A1 EXT…	0	0
UP in EWS	23052	signaling	1.8027e-07	128	437	0.292	MAML2 CELSR3 EPS8 RGS4 ARHGAP42 KDR CCN2 CCN1 IL13RA1 EPHA4 CARD10 PDGFRA GUCY1A2 GEM RAB32 RAB31 DDIT3 TXNIP TRIB1 PTGES CDS1 CD274 RASL12 RTN1 CALCB EPAS1 PDGFB ITPR1 PDGFA IL20RB LY96 BCL10 NTS SDCBP SOCS1 APH1B IRAK2 STC2 HMOX1 ABL2 NPTX2 TAC1 DRD4 S100A10 JUN TGFB2 GADD45B FZD6 LIF ARHGAP29 CORO2A ARHGAP23 NR4A2 RCAN1 BCL3 PKIG CD24 NRP1 CSRNP1 FLT1 CXCL8 PIK3CD ADM VLDLR RND3 TNFSF13B HERPU…	0	0	UP in siEF	32501	multicellular organismal process	1.8943e-17	488	1392	0.35	ZNF296 SERPINE2 AVIL SERPINE1 COL12A1 F11R GRPR EPS8 GPR176 ALCAM DPYSL4 CREB3L2 CYP1B1 CMKLR1 CUBN MEF2C CXADR UNC5B PRKCD UNC5C HSPG2 DKK1 DKK3 BCAM MYL6 HOXB9 PRKAR1B DDIT3 TXNIP SERPING1 SPIN2B HOXB8 MYL9 LXN CRABP2 CRABP1 PDGFB PDGFA BCL10 SLC5A3 CHST11 S100A16 RDH10 PDGFC MYO6 S100A13 HMOX1 KCNMB4 ABCA1 JUN FZD2 JUP FZD5 FZD7 ABCA4 FZD6 PBX3 EIF2AK3 FN1 NFATC2 L1CAM GRIN2C FOSL1 EHD1 COL1A1…	0	0	DN in EWS	32555	purine ribonucleotide binding	0.0018398	51	267	0.191	PI4K2B MAST1 CHD3 CHTF18 PIK3CG KHK HK1 GMPPB ARL5B PAPOLA RAC3 IKBKE PSKH1 AMN HSP90AA1 ATP11C LIG3 TYK2 RAB33A TUBA4A GTPBP3 ACLY OBSCN MYH3 KIF16B EEF1A2 CMPK1 RHOU MVD FKBP4 ARF6 PFKFB4 ACSS2 MVK HSPA4L PALM3 TRANK1 ADCY7 AK7 DHX33 MYH10 MAP2K5 MAPK3 HSPA8 MLKL MMAA RASL10B MMAB CAMK1 HSPA1B HSPA1A	0	0	DN in siEF	9987	cellular process	1.054e-25	615	873	0.704	RB1 IPO11 PGLYRP2 POP1 RAX ENO2 CLDN1 SMC4 ALKBH8 SMC2 PREX1 LIPE PSMD3 C3AR1 AP1S3 GTSE1 EARS2 UNC5A NUP210 FNBP1 DAPK1 PRKCB DDX11 SYTL5 PASK ISL1 PHKA2 WDR77 SLC5A6 MTHFD1 PSME4 FDX1 PADI2 PRKD1 FREM2 ASF1B ENPEP NUP205 CDCA2 CDCA3 SRCAP PRKDC CDCA5 NCAPG THY1 SKA3 NCAPH SKA2 C5 TERT FIGNL1 SLC19A3 NUP88 NR2C2AP NKX2-2 NAA50 PLK4 FZD1 NGFR PRPF38A DNAH10 SNAPIN FZD4 PLK1 EXOC6B NFATC3 NR0B1 PA…	0	0	UP in siEF&EEF	48518	positive regulation of biological process	3.393e-14	337	1778	0.189	OXTR TRIO TRAF3IP2 SERPINE2 CBLB IL27RA SCAMP5 EDNRA CNST ZMIZ1 CREB3L4 NAMPT CREB3L2 DPF1 SOX8 SOX9 CCN1 SOX6 KIFAP3 JUNB SOX4 PDK1 ACVR1 CPT1A MEF2C SERPINF1 DAPK3 FNDC3B RFX3 PRKCA ACTN4 MAPK8IP2 TIAM2 CCDC80 HOXB9 TEP1 DDIT3 TXNIP MAML3 TRIB2 ATF3 STX1A CFD BEX3 NUMBL SLC22A5 SDC4 TSHZ3 EPAS1 PDGFA BCL10 SEC14L2 APH1B TSPAN6 PDGFC MYO6 S100A13 HMOX1 APOE ABCA1 WWTR1 JUN JUP PLK2 FZD7 EIF2AK3 …	0	0
UP in EWS	1944	vasculature development	1.8027e-07	27	437	0.061	ERRFI1 NRP1 FOXC2 FLT1 CXCL8 EPAS1 LAMA4 TNFAIP2 PDGFA THBS1 APOLD1 AMOT KDR HMOX1 ITGB8 CCN2 CCN1 JUN TGFB2 TNFRSF12A LIF VEGFC COL1A1 KLF5 MMP19 COL8A1 CDH13	0	0	UP in siEF	44420	extracellular matrix part	1.6614e-16	42	1392	0.03	COL18A1 LAMA5 COL16A1 SPARC COL11A1 LAMA4 COL11A2 COL12A1 TNC NTN4 NID1 NID2 EFEMP2 TIMP2 EMILIN3 ANXA2 LAMB2 HSPG2 MFAP5 COL1A1 SMOC2 MFAP4 COL3A1 CCDC80 COL2A1 COL1A2 LOX COL5A1 COL4A2 COL4A1 COL7A1 COL5A3 MFAP2 COL6A1 COL5A2 VWA1 COL6A3 COL8A1 ITGA6 COL9A3 COL9A2 FBN1	0	0	DN in EWS	8202	steroid metabolic process	0.0022732	13	267	0.048	FDPS MVK HMGCS1 SRD5A1 CYP51A1 HSD17B7 ACAT2 TM7SF2 SQLE SOAT1 MVD DHCR7 FDFT1	0	0	DN in siEF	793	condensed chromosome	3.0684e-24	45	873	0.051	BLM ERCC6L SUV39H1 HJURP NCAPG BUB1B HMGB1 SKA3 MKI67 CENPA SMC4 NCAPH AURKB SMC2 SKA2 NOL6 CCNB1 NUF2 RCC1 KNTC1 BUB1 DYNC1I1 CENPU SPAG5 PLK1 KNL1 RANGAP1 SMC1A ZWINT SGO1 CENPE CENPF CENPH INCENP FANCD2 CENPK CENPM CENPN NCAPD2 KIF2C CENPO NCAPD3 SPC24 SPC25 MAD2L1	0	0	UP in siEF&EEF	23033	signaling pathway	3.8763e-14	323	1778	0.181	PATJ OXTR TRIO TRAF3IP2 CBLB IL27RA EPS8 GPR176 EDNRA RPS6KA5 RPS6KA2 BSG HOMER3 CCN1 SOX4 PDK1 CDON ACVR1 EPHA4 PRKCD DAPK3 PRKCA MAPK8IP2 FRS3 MAPK8IP3 MAPK8IP1 PRKAR1B RRAGC PRKAR1A TEP1 DDIT3 PARD3 TXNIP ULK1 MAML3 RIN2 EPHA3 EPHA2 CFD PTGFR NUMBL AGAP2 PDGFA PIK3R3 BCL10 SGPL1 APH1B PRKAR2B STC2 PDGFC MYO6 HMOX1 APOE RALGDS ABCA1 WWTR1 JUN FZD2 FZD5 GADD45B HOMER2 FZD7 FZD6 EIF2AK3 LIF RAB27…	0	0
UP in EWS	23033	signaling pathway	1.8027e-07	96	437	0.219	CSRNP1 FLT1 CXCL8 MAML2 PIK3CD ADM RND3 CELSR3 HERPUD1 EPS8 RGS4 RSPO2 KDR RAC2 RSPO3 ITGB8 PMEPA1 CCN2 CCN1 IL13RA1 RALGPS2 DUSP4 KLF10 EPHA4 CARD10 PDGFRA DUSP2 ITGA1 PLA2G4C SORCS1 FOS DUSP8 NGF GEM RHOB RAB32 RAB31 DDAH1 DDIT3 IL1B ARHGEF3 TXNIP RAPGEF2 CDH13 TRIB1 MET TLR3 HBEGF TLR2 PPP1R15A CDS1 OPRD1 PTGER4 COLEC12 CD274 FOXC2 RASL12 PDGFB PDGFA IL20RB LY96 NEDD9 BCL10 FSTL1 THBS1 GNAI1 S…	0	0	UP in siEF	48514	blood vessel morphogenesis	1.1707e-15	60	1392	0.043	NRP1 COL18A1 FLT1 CXCL8 TNFAIP2 PLAT PTPRJ SHB FGF1 EDNRA CDH2 PLAU KDR LEPR CCN2 CCN1 TGM2 ITGA4 TNFRSF12A ANXA2 LMO4 MMP2 BGN HSPG2 PGF TGFBR1 EREG TGFBR2 MMP14 CEACAM1 ADAM15 COL4A1 CDH13 COL8A1 MFGE8 SCG2 FOXC2 LAMA5 NOTCH3 FOXC1 SEMA3C EPAS1 PDGFA THBS1 APOLD1 ZFP36L1 SGPL1 HMOX1 APOE JUN TGFB2 PRRX1 FN1 LIF VEGFC SMAD7 MYO1E KLF5 CSPG4 PLCD3	0	0	DN in EWS	9987	cellular process	0.0027966	174	267	0.651	SLC23A2 TUSC3 BAIAP2L2 LSM11 HMGN5 PAPOLA RCC1 KPNA4 SLC25A42 PCDHAC2 PSKH1 NUP214 GAMT MBNL1 COL27A1 PCYT2 ANAPC7 TPM4 ACOT11 USP2 EPDR1 ATP11C LIFR OCRL LIG3 PCDHA13 TUBA4A GTPBP3 ACLY OBSCN SOAT1 KIF16B CMPK1 PADI2 FKBP4 PFN2 PFKFB4 SLC26A2 CBFB CHRNA5 HSPA4L TRANK1 PLA2G3 HTRA2 ADRB1 TRMT2B AK7 MRPL10 ACAT2 CACNA1G SLC19A3 B4GALNT1 VILL MYH10 MAP2K5 FDFT1 FDPS HSPA8 CBX6 MLKL SRD5A1 IDH1 HMGA…	0	0	DN in siEF	775	chromosome, centromeric region	2.2679e-22	43	873	0.049	ERCC6L DNMT1 SUV39H1 DSCC1 HJURP BUB1B SKA3 MKI67 CENPA AURKB SKA2 CCNB1 XPO1 NUF2 OIP5 KNTC1 BUB1 DYNC1I1 CENPU HELLS SPAG5 PLK1 KIF22 KNL1 RANGAP1 SMC1A ZWINT SGO1 CENPE CENPF CENPH INCENP CENPI CENPK CENPM BIRC5 CENPN KIF2C CENPO SPC24 ITGB3BP SPC25 MAD2L1	0	0	UP in siEF&EEF	51270	regulation of cellular component movement	6.1559e-14	69	1778	0.038	NRP1 COL18A1 PTPRU CLIC4 BMPR2 FLT1 B4GALT1 CSF1 SERPINE2 WDR44 AMOT CXCL16 ADORA1 IL6R WNT5B IGFBP5 ANXA3 SPHK1 ITGA2 ACTN1 TPM1 F2R ADAM10 RRAS2 UNC5C ACTN4 VASH1 F3 TGFBR1 TGFBR3 CREB3 ADAM17 TEP1 ROR2 AJUBA VCL CHST3 EPHA2 HBEGF CD63 LAMA5 LAMA4 SEMA3A PDGFA NEXN FURIN SEMA3F PLD1 PTGS2 CORO1A RTN4 PODXL PDPN HMOX1 APOE PLXNA3 BBS2 TGFB2 MAP3K1 SMAD3 VEGFC LAMB1 VEGFA SMAD7 EFNA1 DLC1 F2RL1 N…	0	0
UP in EWS	48731	system development	1.8823e-07	106	437	0.242	ERRFI1 SERPINE2 SERPINE1 COL12A1 F11R CELSR3 AMOT TGM1 KIF5C KDR SOX8 CCN2 CCN1 EPHA4 PDGFRA CXADR ISLR2 DKK1 GEM HOXB9 DDIT3 TXNIP COL8A1 BEX2 RTN1 EPAS1 PDGFB PDGFA BCL10 FOXO3 SOCS1 HMOX1 TSPAN2 JUN TGFB2 VCAM1 FZD6 LIF NEB COL1A1 NR4A2 RCAN1 BST1 COL5A3 BCL3 CYP1A1 TPP1 NRP1 CSRNP1 FLT1 CXCL8 FHL1 TNFAIP2 ADM VLDLR SOBP LFNG IMMP2L TIMP2 ITGB8 NKX3-1 KLF10 TNFRSF12A ANXA3 PLLP ITGA1 KRT34 LSR…	0	0	UP in siEF	48519	negative regulation of biological process	2.0177e-15	263	1392	0.188	ERRFI1 IFITM1 SERPINE2 AVIL SERPINE1 CBLB IL27RA AQP1 SCAMP5 EDNRA SOX8 SOX9 SOX4 TNS2 IER3 MEF2C CXADR ACTN1 PRKCD P3H1 DKK1 RUNX2 MAPK8IP1 EREG DKK3 SIGIRR DDIT3 DDIT4 RBP1 TXNIP SERPING1 ULK1 TRIB2 SKAP2 PTGES PDGFB PDGFA BCL10 NUAK2 CHST11 MAP2 HMOX1 APOE A2M S100A11 TNFSF18 ABCA1 JUN APOBEC3F APOBEC3G GADD45A EIF2AK3 OSGIN1 LIF GRIN2C FOSL1 COL1A1 CYLD AGO4 TNFSF4 GIPC1 PDE3A SNAI2 ID3 HBP1 …	0	0	DN in EWS	44444	cytoplasmic part	0.0041999	108	267	0.404	TUSC3 TMEM97 CISD3 TXNDC17 TM7SF2 SYNPR ARL6IP5 SLC25A42 PSKH1 NUP214 GAMT MBNL1 COG6 ANAPC7 TPM4 USP2 ALG14 EPDR1 ANK2 OCRL P3H3 TUBA4A GTPBP3 ACLY OBSCN SOAT1 FKBP4 CES2 GCDH PFKFB4 HTRA2 MRPL10 ACAT2 CACNA1G B4GALNT1 MYH10 FDFT1 FDPS HSPA8 SRD5A1 IDH1 HMGA1 GGCT SQLE ANLN FASN NDUFAF3 PLCH1 SFXN2 DHCR7 EIF4G2 THRA TRADD MAST1 TCIRG1 PIK3CG DHTKD1 HK1 FUNDC2 RAC3 EMB USP30 NEFH IKBKE PCYT1B AMN…	0	0	DN in siEF	6996	organelle organization	3.6986e-21	156	873	0.178	RB1 DCLRE1A ERCC6L DSCC1 CCNF HJURP BUB1B SMC4 SMC2 CDC20 SOX2 PREX1 HMGN5 SOX1 PTTG1 ARHGDIB RCC1 EPC1 DPF3 OIP5 KNTC1 FBXO5 ARID2 TIPIN PRKCB DDX11 UBE2E1 TOMM34 KNL1 HASPIN CDC25A RNF40 SGO1 DKC1 FANCD2 PPIF TIMELESS DNA2 ANAPC1 ASF1B KMT2D BLM DNMT1 CDCA2 CDCA3 SRCAP EPB41 PRKDC CDCA5 NCAPG THY1 PHB PKMYT1 SKA3 MACROH2A2 NCAPH SKA2 CCNB1 RACGAP1 TERT HLTF FAM83D CAV1 PLK1 EAF2 FANCB SSH2 FANC…	0	0	UP in siEF&EEF	1944	vasculature development	6.1559e-14	75	1778	0.042	NRP1 COL18A1 ERRFI1 FLT1 B4GALT1 CXCL8 PLAT PTPRJ SHB PKD1 AMOT EDNRA CDH2 ZMIZ1 LEPR ITGAV CCN1 JUNB TGM2 ACVR1 ITGA4 TNFRSF12A ANXA2 LMO4 SPHK1 MMP2 HSPG2 PGF TGFBR1 TGFBR2 MMP14 ADAM15 LOX TEP1 COL4A1 ITGA7 MYH9 HOXB3 ITGA5 MFGE8 EPHA2 LAMA5 NOTCH3 FOXC1 CUL7 SEMA3C EPAS1 LAMA4 PDGFA APOLD1 FOXO1 RTN4 ZFP36L1 SGPL1 PDPN HMOX1 APOE TCF7L2 JUN TGFB2 PRRX1 FN1 LIF VEGFC VEGFA SMAD7 COL1A1 MYO1E K…	0	0
UP in EWS	6950	response to stress	1.984e-07	85	437	0.194	HRK ERRFI1 NRP1 BTG1 FLT1 CXCL8 SERPINE1 FHL1 ADM VLDLR F11R HERPUD1 NFKBIZ ANKRD1 CASP1 CCN2 CCN1 PDGFRA ANXA3 DUSP1 PLLP TSC22D3 PLA2G4C FOS NGF MID1 DCN VGF DDIT3 IL1B DDIT4 CRY1 TXNIP SERPING1 TRIB3 TRIB1 INA TLR3 TLR2 PPP1R15A CDS1 COLEC12 NDRG4 EPAS1 CEBPG PDGFB ITPR1 PDGFA IL20RB LY96 BCL10 PTGS2 FOXO3 HDAC9 THBS1 APOLD1 NUAK2 IRAK2 HMOX1 STX3 APOL1 A2M TAC1 DRD4 CD55 JUN TGFB2 ANGPT2 VCAM…	0	0	UP in siEF	48523	negative regulation of cellular process	5.508e-15	244	1392	0.175	ERRFI1 IFITM1 SERPINE2 AVIL SERPINE1 CBLB AQP1 SCAMP5 EDNRA SOX8 SOX9 SOX4 TNS2 IER3 MEF2C CXADR ACTN1 PRKCD P3H1 DKK1 RUNX2 MAPK8IP1 EREG DKK3 SIGIRR DDIT3 DDIT4 RBP1 TXNIP ULK1 TRIB2 SKAP2 PTGES PDGFB PDGFA BCL10 NUAK2 CHST11 MAP2 HMOX1 APOE S100A11 TNFSF18 ABCA1 JUN GADD45A EIF2AK3 OSGIN1 LIF FOSL1 COL1A1 CYLD AGO4 TNFSF4 GIPC1 PDE3A SNAI2 ID3 HBP1 FXYD5 RCOR2 HRK NRP1 COL18A1 PTPRU BTG1 TGFB1…	0	0	DN in EWS	9058	biosynthetic process	0.0066372	48	267	0.179	ACSS2 MVK CBFB THRA TUSC3 HAAO TCIRG1 HSD17B7 CHTF18 MRPL10 TM7SF2 GMPPB GYS1 RBBP4 PAPOLA E2F2 B4GALNT1 POLL FDFT1 GAMT FDPS PCYT1B POU1F1 PCYT2 ELOVL4 HMGCS1 GALNT3 PTGES2 SRD5A1 MMAB CYP51A1 HMGA1 ATP11C ELOVL6 LIG3 PAX5 SQLE ACLY SCD FASN PNPLA3 CMPK1 PADI2 MVD SLC25A10 DHCR7 ALDOA POLR3K	0	0	DN in siEF	779	condensed chromosome, centromeric region	1.3835e-20	32	873	0.036	ERCC6L HJURP BUB1B SKA3 CENPA AURKB SKA2 CCNB1 NUF2 KNTC1 BUB1 DYNC1I1 CENPU SPAG5 PLK1 KNL1 RANGAP1 SMC1A ZWINT SGO1 CENPE CENPF CENPH INCENP CENPK CENPM CENPN KIF2C CENPO SPC24 SPC25 MAD2L1	0	0	UP in siEF&EEF	48519	negative regulation of biological process	6.9637e-14	312	1778	0.175	ERRFI1 SERPINE2 AVIL CBLB FGFRL1 IL27RA SCAMP5 EDNRA FTH1 ARL6IP5 SOX8 SOX9 SOX6 KIFAP3 SOX4 TNS2 IER3 ACVR1 TSPYL2 MEF2C CXADR ACTN1 SERPINF1 PRKCD P3H1 RFX3 PRKCA ACTN4 MAPK8IP1 SIGIRR TEP1 DDIT3 DDIT4 RBP1 HOXB4 TXNIP ULK1 TRIB2 SKAP2 STXBP1 PDGFA TWIST1 BCL10 TXN PRDX5 NUAK2 CHST11 DPH3 HMOX1 APOE S100A11 BBS2 ABCA1 WWTR1 JUN APOBEC3F GADD45A EIF2AK3 LIF GRIN2C PBX1 FOSL1 COL1A1 CYLD AGO4 GIP…	0	0
UP in EWS	48856	anatomical structure development	2.1044e-07	113	437	0.258	ERRFI1 SERPINE2 SERPINE1 COL12A1 F11R CELSR3 AMOT TGM1 KIF5C KDR SOX8 CCN2 CCN1 IER3 EPHA4 PDGFRA CXADR ISLR2 DKK1 GEM HOXB9 DDIT3 TXNIP COL8A1 BEX2 RTN1 CALCB SDC4 EPAS1 PDGFB PDGFA BCL10 FOXO3 NTS SOCS1 HMOX1 TSPAN2 JUN TGFB2 VCAM1 FZD6 LIF NEB EVX2 COL1A1 NR4A2 RCAN1 BST1 COL5A3 BCL3 CYP1A1 TPP1 CPM NRP1 CSRNP1 FLT1 CXCL8 FHL1 TNFAIP2 ADM VLDLR SOBP LFNG IMMP2L TIMP2 CASP1 ITGB8 NKX3-1 KLF10 T…	0	0	UP in siEF	19838	growth factor binding	7.5904e-15	39	1392	0.028	NRP1 FLT1 PDGFB HTRA1 LTBP4 PDGFA LTBP3 THBS1 LTBP1 IGFBPL1 KDR S100A13 CCN3 IGFBP7 CCN2 IGFBP6 CCN1 A2M IL6R PDGFRB PDGFRA IL4R FGFBP2 IGFBP5 IGFBP4 IGFBP3 IGFBP2 CRIM1 TGFBR1 TGFBR2 COL1A1 TGFBR3 COL3A1 COL2A1 COL1A2 COL5A1 COL4A1 COL6A1 IL7R	0	0	DN in EWS	44238	primary metabolic process	0.0073871	109	267	0.408	SLC23A2 TUSC3 MPI TM7SF2 LSM11 PAPOLA PSKH1 GAMT MBNL1 PCYT2 ANAPC7 ACOT11 USP2 ATP11C OCRL LIG3 GTPBP3 ACLY OBSCN SOAT1 CMPK1 PADI2 FKBP4 PFKFB4 CBFB HSPA4L TRANK1 PLA2G3 HTRA2 TRMT2B AK7 MRPL10 ACAT2 B4GALNT1 MAP2K5 FDFT1 FDPS HSPA8 MLKL SRD5A1 IDH1 HMGA1 SQLE PPP1R1A FASN PLCH1 DHCR7 EIF4G2 RNF11 THRA MAST1 WDR4 TCIRG1 CHTF18 PIK3CG KHK DHTKD1 HK1 GYS1 SUMO3 POLL MAN2C1 USP30 IKBKE PRMT6 PCYT1…	0	0	DN in siEF	16043	cellular component organization	2.2721e-20	234	873	0.268	RB1 POP1 CCNF SMC4 SMC2 CDC20 SOX2 PREX1 BAIAP2L2 SOX1 RCC1 EPC1 DPF3 FBXO5 AP1S3 TP63 EPHA7 TIPIN UNC5A FNBP1 ACTN2 PRKCB DDX11 KNL1 HASPIN WDR77 UHMK1 ARC DNA2 ASF1B NUP205 CDCA2 CDCA3 SRCAP EPB41 PRKDC CDCA5 ARX NCAPG THY1 SKA3 KALRN NCAPH SKA2 RACGAP1 TERT HLTF NGFR EGR2 ABCA5 BCL11B PLK1 EAF2 ZWINT ANLN TPX2 SASS6 STRN RCOR1 EZH2 TP73 TOP2A AHCTF1 SUV39H1 NCAPG2 KIF11 BRCA2 ARHGAP4 KIF15 VMO…	0	0	UP in siEF&EEF	1568	blood vessel development	1.2084e-13	73	1778	0.041	NRP1 COL18A1 FLT1 B4GALT1 CXCL8 PLAT PTPRJ SHB PKD1 AMOT EDNRA CDH2 ZMIZ1 LEPR ITGAV CCN1 JUNB TGM2 ACVR1 ITGA4 TNFRSF12A ANXA2 LMO4 SPHK1 MMP2 HSPG2 PGF TGFBR1 TGFBR2 MMP14 ADAM15 LOX TEP1 COL4A1 ITGA7 MYH9 HOXB3 ITGA5 MFGE8 EPHA2 LAMA5 NOTCH3 FOXC1 CUL7 SEMA3C EPAS1 LAMA4 PDGFA APOLD1 FOXO1 RTN4 ZFP36L1 SGPL1 HMOX1 APOE TCF7L2 JUN TGFB2 PRRX1 FN1 LIF VEGFC VEGFA SMAD7 COL1A1 MYO1E KLF5 COL5A1 I…	0	0
UP in EWS	31012	extracellular matrix	2.613e-07	30	437	0.068	SERPINE2 COL11A1 LAMA4 SERPINE1 COL12A1 OLFML2A LTBP1 THBS1 THSD4 FBLN5 CLGN ADAMTS3 TIMP2 CCN2 ADAMTS9 CTHRC1 TGFB2 OMD MMP3 NPNT MMP10 ASPN DCN COL1A1 MMP15 COL5A3 MMP19 COL8A1 MATN3 MATN2	0	0	UP in siEF	5515	protein binding	1.1791e-14	785	1392	0.563	AVIL SCAMP5 ISLR TMEM8B MEF2C CXADR UNC5B UNC5C BHLHA15 HSPG2 SIGIRR CLDN4 DDIT3 ORAI3 ORAI2 TXNIP ATF3 OPTN SKAP2 ZBTB8A LXN HHLA3 PDGFB PDGFA RNF215 EPB41L1 PDGFC MYO6 KCNMB4 ABCA1 JUN BTBD19 JUP EIF2AK3 FN1 L1CAM GRIN2C AIF1L COL1A1 ABTB1 PPFIBP1 COL1A2 AGO4 FXYD5 HRK HEXA LRRC3 SHB LRRC32 LITAF MYPN TRIOBP BBC3 PANX2 JPH2 APC2 DUSP2 FGFBP2 SPHK1 MYOF BGN RRAS2 F3 DUSP6 SUMF1 MMP14 MMP15 DPYD …	0	0	DN in EWS	16765	transferase activity, transferring alkyl or aryl (other than methyl) groups	0.0095255	6	267	0.022	GSTM4 FDPS GSTM2 GSTA4 MMAB FDFT1	0	0	DN in siEF	31981	nuclear lumen	2.3268e-20	149	873	0.17	RB1 POP1 DSCC1 HJURP TTF2 MKI67 IPO5 CDC20 SOX2 HMGN5 CCND1 EME1 CHEK2 MYB EPC1 OIP5 FBXO5 WDHD1 LIG1 ACTN2 DIMT1 DDX11 UBE2E1 VRK1 LIG3 POU3F1 POU3F2 CDC25A ARC DKC1 FANCD2 GRWD1 PSME4 GEMIN4 GEMIN5 MATR3 DNA2 KIF20B ANAPC1 KPNB1 KMT2D BLM PRKDC PHB PKMYT1 CCNB1 EMG1 DHX33 TERT ORC1 NACC1 ALX4 BRIX1 UTP20 CLSPN PPARGC1B TOE1 PLK4 FANCI NGFR CDT1 FANCM ZBTB16 PLK1 EAF2 PA2G4 FANCB RCL1 POLA1 CDK4…	0	0	UP in siEF&EEF	16020	membrane	1.2389e-13	886	1778	0.498	CHIC2 F11R SCAMP5 COMTD1 TMEM8B GABARAPL1 CXADR UNC5B UNC5C FRS3 SIGIRR ASPHD1 ORAI2 ASPHD2 SKAP2 NLRX1 TTYH3 MTMR3 COL13A1 TPRG1L PDGFA PLA2G6 SLC5A3 RNF215 EPB41L1 PRKAR2B RDH10 RNF217 PDGFC MYO6 KCNMB4 ABCA1 PRRT3 CADM4 JUP ABCA3 EDEM2 EIF2AK3 BTBD11 L1CAM GRIN2C AIF1L GRIN2D COL1A1 PPFIBP1 SFXN3 FAT3 DCHS1 FXYD5 TMEM9B ACHE ARF4 LRRC3 TMEM51 TMEM53 SHB PIGV LITAF LRRC1 TMEM47 PANX2 TMEM43 TME…	0	0
UP in EWS	42221	response to chemical stimulus	2.702e-07	74	437	0.169	BTG1 FLT1 CXCL8 SERPINE1 ADM VLDLR ETS1 HERPUD1 AMOT EPS8 RAC2 CASP1 CCN2 CCN1 DUSP4 KLF10 PDGFRA ANXA3 DUSP1 ITGA1 MMP3 FOS NGF DCN VGF DDIT3 IL1B DDIT4 TXNIP MMP19 CDH13 PLIN2 TRIB3 TRIB1 TLR3 ABCG1 TLR2 PPP1R15A OPRD1 COLEC12 FOXC2 EPAS1 PDGFB ITPR1 PDGFA LY96 BCL10 PTGS2 HDAC9 NDRG1 THBS1 APOLD1 SOCS1 IRAK2 STC2 HSD17B2 HMOX1 FYN STX3 MSX1 A2M TAC1 DRD4 JUN TGFB2 ANGPT2 VCAM1 CCL20 VEGFC KLF2…	0	0	UP in siEF	44459	plasma membrane part	1.4178e-14	258	1392	0.185	ERRFI1 PATJ OXTR SERPINE2 F11R GRPR ICAM1 IL27RA AQP1 EPS8 SCAMP5 GPR176 EDNRA ALCAM KDR HOMER3 SYNPO TNS2 CMKLR1 ANKS1B EPHA4 CUBN CXADR UNC13A ACTN1 HLA-B HLA-C HLA-A ANK1 TM4SF1 EREG BCAM CLDN4 KCTD11 OBSL1 KCTD15 EPHA3 SLC22A4 PTGFR SLC22A5 SDC4 SDC2 BCL10 PPL SLC5A3 SYNGR2 TSPAN9 MYO6 TSPAN4 HMOX1 ST3GAL5 KCNMB4 APOE KCNN4 NTSR1 ABCA1 FZD2 JUP FZD5 ABCA4 FZD6 SLC33A1 RAB27A PARVA PARVB L1CAM…	0	0	DN in EWS	44255	cellular lipid metabolic process	0.0095255	21	267	0.078	FDPS PCYT1B AMN PCYT2 MVK ELOVL4 HMGCS1 PTGES2 ACOT11 PLA2G3 ELOVL6 OCRL ACAT2 PIK3CG SOAT1 SCD FASN PNPLA3 B4GALNT1 MVD FDFT1	0	0	DN in siEF	43228	non-membrane-bounded organelle	2.8248e-20	225	873	0.257	RB1 POP1 CCNF DNHD1 MKI67 SMC4 SMC2 CDC20 PNP RCC1 FBXO5 GTSE1 TIPIN FNBP1 ACTN2 DAPK1 DDX11 KNL1 PASK ARC KATNAL1 GRWD1 KIF20B ASF1B PIF1 EPB41 NCAPG SKA3 KALRN NCAPH SKA2 BRIP1 DHX33 RACGAP1 TERT TOE1 PLK4 DNAH10 PLK1 EAF2 NR0B1 PA2G4 FLI1 ZWINT ANLN POLA1 TPX2 ID2 SASS6 STRN CALM1 RYR2 AHCTF1 CSRNP3 SUV39H1 KIF14 BRCA1 KIF11 BRCA2 JPH1 MYOM2 WDR43 KIF15 TRIM9 TUBA1B XPO1 NUF2 KIF1C DLGAP1 KIF1…	0	0	UP in siEF&EEF	48523	negative regulation of cellular process	1.3357e-13	289	1778	0.162	ERRFI1 SERPINE2 AVIL CBLB FGFRL1 SCAMP5 EDNRA FTH1 SOX8 SOX9 SOX6 KIFAP3 SOX4 TNS2 IER3 ACVR1 TSPYL2 MEF2C CXADR ACTN1 SERPINF1 PRKCD P3H1 RFX3 PRKCA ACTN4 MAPK8IP1 SIGIRR TEP1 DDIT3 DDIT4 RBP1 HOXB4 TXNIP ULK1 TRIB2 SKAP2 STXBP1 PDGFA TWIST1 BCL10 TXN PRDX5 NUAK2 CHST11 DPH3 HMOX1 APOE S100A11 ABCA1 WWTR1 JUN GADD45A EIF2AK3 LIF PBX1 FOSL1 COL1A1 CYLD AGO4 GIPC1 ID1 SNAI2 ID3 HBP1 FXYD5 RCOR2 CD…	0	0
UP in EWS	1568	blood vessel development	3.2867e-07	26	437	0.059	NRP1 FOXC2 FLT1 CXCL8 EPAS1 LAMA4 TNFAIP2 PDGFA THBS1 APOLD1 AMOT KDR HMOX1 ITGB8 CCN2 CCN1 JUN TGFB2 TNFRSF12A LIF VEGFC COL1A1 KLF5 MMP19 COL8A1 CDH13	0	0	UP in siEF	51270	regulation of cellular component movement	1.9094e-14	61	1392	0.043	NRP1 COL18A1 PTPRU FLT1 CSF1 SERPINE2 PTPRO SERPINE1 ETS1 ICAM1 CXCL16 PLAU ADORA1 KDR IL6R PDGFRB PDGFRA WNT5B IGFBP5 ANXA3 SPHK1 ACTN1 IGFBP3 TPM1 F2R RRAS2 UNC5C VASH1 F3 TGFBR1 GREM1 TGFBR3 CDH13 ROR2 AJUBA HBEGF CD63 LAMA5 SP100 LAMA4 SEMA3A PDGFB PDGFA NEXN SEMA3F PLD1 PTGS2 THBS1 PODXL HMOX1 CCL2 APOE TAC1 PLXNA3 TGFB2 SMAD3 VEGFC SMAD7 EFNA1 F2RL1 BCAR1	0	0	DN in EWS	166	nucleotide binding	0.016996	55	267	0.205	PI4K2B MAST1 CHD3 CHTF18 PIK3CG KHK HK1 GMPPB ARL5B PAPOLA RAC3 IKBKE PSKH1 AMN HSP90AA1 ATP11C LIG3 TYK2 RAB33A TUBA4A GTPBP3 ACLY OBSCN MYH3 EWSR1 KIF16B EEF1A2 CMPK1 RHOU MVD FKBP4 ARF6 GCDH PFKFB4 ACSS2 MVK HSPA4L PALM3 TRANK1 ADCY7 AK7 DHX33 MYH10 MAP2K5 MAPK3 HSPA8 MLKL MMAA RASL10B MMAB IDH1 SQLE CAMK1 HSPA1B HSPA1A	0	0	DN in siEF	43232	intracellular non-membrane-bounded organelle	2.8248e-20	225	873	0.257	RB1 POP1 CCNF DNHD1 MKI67 SMC4 SMC2 CDC20 PNP RCC1 FBXO5 GTSE1 TIPIN FNBP1 ACTN2 DAPK1 DDX11 KNL1 PASK ARC KATNAL1 GRWD1 KIF20B ASF1B PIF1 EPB41 NCAPG SKA3 KALRN NCAPH SKA2 BRIP1 DHX33 RACGAP1 TERT TOE1 PLK4 DNAH10 PLK1 EAF2 NR0B1 PA2G4 FLI1 ZWINT ANLN POLA1 TPX2 ID2 SASS6 STRN CALM1 RYR2 AHCTF1 CSRNP3 SUV39H1 KIF14 BRCA1 KIF11 BRCA2 JPH1 MYOM2 WDR43 KIF15 TRIM9 TUBA1B XPO1 NUF2 KIF1C DLGAP1 KIF1…	0	0	UP in siEF&EEF	48522	positive regulation of cellular process	1.4273e-13	309	1778	0.173	OXTR TRIO TRAF3IP2 SERPINE2 SCAMP5 EDNRA CNST ZMIZ1 CREB3L4 NAMPT CREB3L2 DPF1 SOX8 SOX9 CCN1 SOX6 KIFAP3 JUNB SOX4 PDK1 ACVR1 CPT1A MEF2C SERPINF1 DAPK3 FNDC3B RFX3 PRKCA ACTN4 MAPK8IP2 TIAM2 CCDC80 HOXB9 TEP1 DDIT3 TXNIP MAML3 TRIB2 ATF3 STX1A BEX3 NUMBL SDC4 TSHZ3 EPAS1 PDGFA BCL10 SEC14L2 APH1B TSPAN6 PDGFC MYO6 S100A13 HMOX1 APOE ABCA1 WWTR1 JUN JUP PLK2 FZD7 EIF2AK3 LIF RAB27A L1CAM PBX1 FO…	0	0
UP in EWS	32496	response to lipopolysaccharide	5.1008e-07	17	437	0.038	JUN SERPINE1 LY96 ADM FOS VLDLR PTGS2 NGF DCN SOCS1 IRAK2 IL1B CYP1A1 CASP1 TRIB1 TAC1 TLR2	0	0	UP in siEF	23033	signaling pathway	1.114e-13	264	1392	0.189	IFITM1 PATJ OXTR MAML2 CBLB GRPR IL27RA EPS8 GPR176 EDNRA RPS6KA2 KDR FBXO6 HOMER3 CCN2 CCN1 SOX4 CMKLR1 CDON EPHA4 PRKCD BHLHA15 MAPK8IP2 MAPK8IP1 EREG PRKAR1B RRAGC DDIT3 TXNIP ULK1 RIN2 EPHA3 CFD PTGFR PDGFB PDGFA PIK3R3 BCL10 SGPL1 APH1B STC2 PDGFC MYO6 PENK HMOX1 APOE RALGDS NTSR1 ABCA1 JUN FZD2 FZD5 GADD45B FZD7 FZD6 EIF2AK3 LIF RAB27A NFATC1 L1CAM GRIN2C CYLD COL1A2 GIPC1 ITGBL1 SDC1 HBP1 …	0	0	DN in EWS	5524	ATP binding	0.017314	40	267	0.149	PI4K2B PFKFB4 ACSS2 MVK HSPA4L MAST1 PALM3 TRANK1 CHD3 CHTF18 ADCY7 AK7 PIK3CG KHK HK1 DHX33 PAPOLA IKBKE MYH10 MAP2K5 PSKH1 MAPK3 HSPA8 AMN HSP90AA1 MLKL MMAB ATP11C LIG3 TYK2 ACLY OBSCN MYH3 KIF16B CMPK1 MVD CAMK1 FKBP4 HSPA1B HSPA1A	0	0	DN in siEF	6974	response to DNA damage stimulus	3.6618e-20	72	873	0.082	DCLRE1B TOP2A DCLRE1A FEN1 RIF1 MCM7 NUDT1 BCCIP BRCA1 HMGB1 BRCA2 ALKBH8 CHAF1B CHAF1A CCND1 PTTG1 EME1 EXO1 CHEK2 GTSE1 POLE TP63 RFC5 PRMT6 SHPRH RFC3 TIPIN RFC4 LIG1 RFC2 RAD23A LIG3 KIF22 ESCO2 SMC1A NEIL3 FANCD2 TIMELESS DNA2 DTL MCM2 BLM PCNA PRKDC FAAP24 TYMS POLD3 RAD51AP1 BRIP1 SLX4 POLD1 RBBP8 RAD54L CLSPN MAP2K6 FANCI POLQ ATAD5 FANCM XRCC2 PLK1 FANCA FANCC SSRP1 FANCB FANCG TICRR POL…	0	0	UP in siEF&EEF	5488	binding	1.8782e-13	1380	1778	0.776	CHIC2 ZNF296 AVIL ALKBH7 ZFYVE1 SCAMP5 TMEM8B ZNF287 GSTK1 GABARAPL1 MEF2C CXADR UNC5B HPCAL1 RFX3 UNC5C FRS3 HSPG2 SIGIRR MYL5 MYL6 PRKAR1B PRKAR1A DDIT3 ETHE1 RBP1 ORAI2 TXNIP OPTN ATF3 SKAP2 EXD2 ZBTB8A NLRX1 MTMR3 COL13A1 CRABP2 FLII HHLA3 SHOX2 TPRG1L AGAP2 PDGFA MTMR9 ADAMTS10 ADAMTS15 RNF215 EPB41L1 PRKAR2B RDH10 RNF217 PDGFC MYO6 KCNMB4 GTF2IRD2B ABCA1 JUN JUP FUCA1 ABCA3 FUCA2 EDEM2 FN1 …	0	0
UP in EWS	48513	organ development	5.6121e-07	84	437	0.192	ERRFI1 NRP1 CSRNP1 FLT1 CXCL8 SERPINE1 FHL1 TNFAIP2 ADM F11R SOBP AMOT LFNG TGM1 IMMP2L KDR ITGB8 SOX8 CCN2 CCN1 NKX3-1 KLF10 PDGFRA CXADR TNFRSF12A ANXA3 KRT34 LSR DKK1 ASPN GEM DCN GREM1 HOXB9 VGF DDIT3 IRF1 TXNIP MMP19 COL8A1 CDH13 TMBIM6 INA HBEGF FOXC2 CSTA EPAS1 TUFT1 LAMA4 CEBPG PDGFB PDGFA BCL10 PTGS2 FOXO3 HDAC9 THBS1 APOLD1 SOCS1 GPNMB HMOX1 DMD FYN MSX1 JUN MCOLN3 TGFB2 ANGPT2 VCAM1 FZ…	0	0	UP in siEF	9888	tissue development	2.9683e-13	123	1392	0.088	ERRFI1 CSF1 SERPINE1 TNC F11R CELSR1 TGM1 EDNRA PLAU CREB3L2 KDR SOX8 CCN2 SOX9 CCN1 TGM2 PDGFRB POSTN CXADR WNT5B IGFBP5 LMO4 TPM1 F2R DKK1 PGF EREG MYL6 BTD COL4A1 NINJ1 TXNIP S100A4 ROR2 OBSL1 NOTCH3 DLX2 CRABP2 TSHZ3 PDGFB PDGFA BCL10 PPL FAM83H UGCG SOCS3 CHST11 S100A16 PODXL RDH10 CYTL1 WNT3 JUN TGFB2 FZD2 SMAD3 JUP FZD6 EIF2AK3 LIF SMAD7 COL1A1 RCAN1 COL1A2 BMP1 COL5A1 COL5A3 COL5A2 ALPL S…	0	0	DN in EWS	30554	adenyl nucleotide binding	0.017314	42	267	0.157	PI4K2B GCDH PFKFB4 ACSS2 MVK HSPA4L MAST1 PALM3 TRANK1 CHD3 CHTF18 ADCY7 AK7 PIK3CG KHK HK1 DHX33 PAPOLA IKBKE MYH10 MAP2K5 PSKH1 MAPK3 HSPA8 AMN HSP90AA1 MLKL MMAB ATP11C LIG3 TYK2 SQLE ACLY OBSCN MYH3 KIF16B CMPK1 MVD CAMK1 FKBP4 HSPA1B HSPA1A	0	0	DN in siEF	776	kinetochore	6.2129e-20	33	873	0.037	ERCC6L HJURP BUB1B SKA3 CENPA SKA2 CCNB1 XPO1 NUF2 KNTC1 BUB1 DYNC1I1 CENPU SPAG5 PLK1 KIF22 KNL1 RANGAP1 SMC1A ZWINT SGO1 CENPE CENPF CENPH INCENP CENPK CENPM CENPN KIF2C CENPO SPC24 SPC25 MAD2L1	0	0	UP in siEF&EEF	35466	regulation of signaling pathway	2.5283e-13	181	1778	0.101	ERRFI1 TRIO CSF1 TRAF3IP2 GOLT1B CD81 CBLB RGS2 CDH2 LEPR CIR1 MAP3K6 IL6R RGS9 TBC1D10A SOX4 MAP3K5 TGM2 PHLDA3 ACVR1 CARD10 TLE1 WNT5B IGFBP5 CTNNBIP1 TMOD2 PRKCD IGFBP2 F2R SHISA5 PRKCA MAPK8IP2 MAPK8IP3 MID1 MAPK8IP1 SIGIRR TIAM2 ADAM17 TEP1 ULK1 TBC1D23 TRIB2 SQSTM1 TBC1D19 FICD HTRA1 AGAP2 LTBP4 BCL10 RASAL2 FOXO1 STK3 ATXN1 CHST11 IRAK2 TSPAN6 S100A13 HMOX1 APOE TBC1D17 RALGDS WWTR1 TGFB2 …	0	0
UP in EWS	1666	response to hypoxia	6.1922e-07	19	437	0.043	TGFB2 FLT1 ANGPT2 VCAM1 EPAS1 PDGFB ITPR1 PDGFA ADM VLDLR THBS1 APOLD1 NR4A2 DDIT4 CYP1A1 CASP1 HMOX1 CD24 TLR2	0	0	UP in siEF	5581	collagen	3.8612e-13	21	1392	0.015	COL18A1 COL16A1 COL11A1 COL11A2 COL12A1 COL1A1 COL3A1 COL2A1 COL1A2 LOX COL5A1 COL4A2 COL4A1 COL7A1 COL5A3 COL6A1 COL5A2 COL6A3 COL8A1 COL9A3 COL9A2	0	0	DN in EWS	44237	cellular metabolic process	0.017314	102	267	0.382	SLC23A2 TUSC3 LSM11 PAPOLA PSKH1 GAMT MBNL1 PCYT2 ANAPC7 ACOT11 USP2 ATP11C OCRL LIG3 GTPBP3 ACLY OBSCN SOAT1 CMPK1 PADI2 FKBP4 PFKFB4 CBFB HSPA4L TRANK1 PLA2G3 TRMT2B AK7 MRPL10 ACAT2 SLC19A3 B4GALNT1 MAP2K5 FDFT1 FDPS HSPA8 MLKL SRD5A1 IDH1 HMGA1 SQLE PPP1R1A FASN EIF4G2 RNF11 THRA MAST1 WDR4 TCIRG1 CHTF18 PIK3CG CYB561D2 KHK DHTKD1 HK1 GYS1 SUMO3 POLL MAN2C1 USP30 IKBKE PRMT6 PCYT1B AMN HSP90A…	0	0	DN in siEF	777	condensed chromosome kinetochore	1.0782e-19	30	873	0.034	ERCC6L HJURP BUB1B SKA3 CENPA SKA2 CCNB1 NUF2 KNTC1 BUB1 DYNC1I1 CENPU SPAG5 PLK1 KNL1 RANGAP1 SMC1A ZWINT SGO1 CENPF CENPH INCENP CENPK CENPM CENPN KIF2C CENPO SPC24 SPC25 MAD2L1	0	0	UP in siEF&EEF	31012	extracellular matrix	4.4387e-13	84	1778	0.047	LGALS3BP ACHE COL18A1 SPARC SERPINE2 TNC LAMC1 HAPLN3 PCSK6 LOXL1 LGALS3 ADAMTS3 ADAMTSL4 TIMP2 EMILIN3 EMILIN2 EMILIN1 TIMP1 ADAMTS9 ADAMTS7 WNT5B DST ANXA2 MMP2 P3H1 NPNT HSPG2 F3 MMP11 MMP14 VCAN CCDC80 COL2A1 MMP16 LOX COL4A2 MMP15 COL4A1 COL6A2 PXDN MMP17 COL6A1 VWA1 ITGA6 FREM2 MATN2 LAMA5 TNXB COL13A1 LAMA4 COL11A2 LTBP4 FBLN1 LTBP3 NID1 NID2 LTBP1 ADAMTS10 THSD4 FBLN5 ADAMTS15 GPC1 PSAP G…	0	0
UP in EWS	48514	blood vessel morphogenesis	7.1553e-07	23	437	0.052	NRP1 FOXC2 JUN TGFB2 FLT1 CXCL8 TNFRSF12A EPAS1 LIF TNFAIP2 PDGFA VEGFC THBS1 APOLD1 AMOT KLF5 KDR HMOX1 MMP19 COL8A1 CDH13 CCN2 CCN1	0	0	UP in siEF	65007	biological regulation	5.4896e-13	682	1392	0.489	ZNF296 SERPINE2 MAML2 AVIL SERPINE1 GRPR BACH2 EPS8 SCAMP5 GPR173 ALCAM CREB3L1 CREB3L2 CYP1B1 TMEM8B IER3 CUBN MEF2C CXADR MBNL2 UNC5B PRKCD FNDC3B MED8 UNC5C BHLHA15 DKK1 DKK3 SIGIRR BCAM HOXB9 PRKAR1B DDIT3 DDIT4 RBP1 TXNIP SPARCL1 SERPING1 HOXB8 MYL9 ATF3 OPTN SKAP2 CFD ZBTB8A CRABP2 FICD CRABP1 PDGFB PDGFA BCL10 SLC5A3 CHST11 RDH10 PDGFC MYO6 S100A13 HMOX1 KCNMB4 GTF2IRD2B S100A11 S100A10 AB…	0	0	DN in EWS	4772	sterol O-acyltransferase activity	0.017531	2	267	0.007	SOAT1 ACAT2	0	0	DN in siEF	44446	intracellular organelle part	1.0782e-19	364	873	0.416	RB1 POP1 CCNF DNHD1 TMEM97 MKI67 SMC4 SMC2 CDC20 SOX2 SYNPR NDST4 CHEK2 MYB ANKFY1 RCC1 EPC1 DPF3 FBXO5 AP1S3 GTSE1 EARS2 MFSD2A WDHD1 ST6GAL1 TIPIN ALG6 NUP210 ACTN2 DDX11 KNL1 ARC KATNAL1 GRWD1 PSME4 FDX1 DNA2 KIF20B CES1 ASF1B PIF1 NUP205 PAXIP1 EPB41 PRKDC NCAPG SKA3 NCAPH SKA2 BRIP1 DHX33 RACGAP1 TERT ST8SIA5 ALX4 NUP88 PPARGC1B TOE1 PLK4 NGFR CDT1 PRPF38A DNAH10 SNAPIN ABCA5 PLK1 EAF2 IGF1 …	0	0	UP in siEF&EEF	7155	cell adhesion	8.4645e-13	139	1778	0.078	SCARB2 CLSTN3 TNC CIB1 F11R CELSR1 PVR CELSR3 LOXL2 ALCAM CDH2 NRCAM PLXNC1 SOX9 CCN1 PDK1 TMEM8B CDON CXADR ACTN1 LMO7 NPNT HSPG2 ADAM17 BCAM ADAM15 NINJ1 CERCAM TLN2 ROR2 AJUBA FREM2 VCL CD151 COL13A1 FBLIM1 STXBP1 SDC3 CD99L2 NID1 CORO1A LPP PCDH18 NID2 FBLN5 BCL2L11 PDZD2 NPHP1 LPXN ABL2 CADM4 JUP MCAM FN1 PARVA PARVB L1CAM PPFIBP1 FER BMP1 COL5A1 PTK7 ITGA10 FAT3 DCHS1 CD24 SDK2 ITGB1 DDR1 R…	0	0
UP in EWS	9719	response to endogenous stimulus	7.1553e-07	36	437	0.082	FOXC2 BTG1 SERPINE1 PDGFB PDGFA ADM VLDLR PTGS2 HDAC9 THBS1 SOCS1 HMOX1 CCN2 CCN1 A2M TAC1 DRD4 PDGFRA TGFB2 ANXA3 DUSP1 MMP3 FOS NGF COL1A1 NR4A2 VGF DDIT3 IL1B TXNIP MMP19 CDH13 TRIB3 CD24 ABCG1 TLR2	0	0	UP in siEF	30154	cell differentiation	6.1356e-13	219	1392	0.157	SPON2 SERPINE2 SPATA20 F11R LGALS3 EDNRA ALCAM CREB3L2 KDR SOX8 CCN2 SOX9 CCN1 SOX4 CDON EPHA4 MEF2C CXADR UNC5B ISLR2 UNC5C BHLHA15 DKK1 RUNX2 EREG TXNIP ULK2 KCTD11 ULK1 OBSL1 EPAS1 SDC2 PPL SGPL1 CHST11 S100A16 MAP2 RDH10 MYO6 TSPAN2 APOE JUN FZD2 FZD5 GADD45B FZD7 EIF2AK3 FN1 OSGIN1 LIF RAB27A L1CAM DCLK1 COL1A1 PDE3A SDC1 ID3 NRP1 COL18A1 PCSK1 PTPRU TGFB1I1 PTPRO PTPRJ ADM SHB PCSK4 PTPRG C…	0	0	DN in EWS	34736	cholesterol O-acyltransferase activity	0.017531	2	267	0.007	SOAT1 ACAT2	0	0	DN in siEF	44422	organelle part	1.7322e-19	367	873	0.42	RB1 POP1 CCNF DNHD1 TMEM97 MKI67 SMC4 SMC2 CDC20 SOX2 SYNPR NDST4 CHEK2 MYB ANKFY1 RCC1 EPC1 DPF3 FBXO5 AP1S3 GTSE1 EARS2 MFSD2A WDHD1 ST6GAL1 TIPIN ALG6 NUP210 ACTN2 DDX11 KNL1 SLC5A6 ARC KATNAL1 GRWD1 PSME4 FDX1 DNA2 KIF20B CES1 ASF1B PIF1 NUP205 PAXIP1 EPB41 PRKDC NCAPG SKA3 NCAPH SKA2 BRIP1 DHX33 RACGAP1 TERT ST8SIA5 ALX4 NUP88 PPARGC1B TOE1 PLK4 NGFR CDT1 PRPF38A DNAH10 SNAPIN ABCA5 PLK1 EAF…	0	0	UP in siEF&EEF	22610	biological adhesion	9.2064e-13	139	1778	0.078	SCARB2 CLSTN3 TNC CIB1 F11R CELSR1 PVR CELSR3 LOXL2 ALCAM CDH2 NRCAM PLXNC1 SOX9 CCN1 PDK1 TMEM8B CDON CXADR ACTN1 LMO7 NPNT HSPG2 ADAM17 BCAM ADAM15 NINJ1 CERCAM TLN2 ROR2 AJUBA FREM2 VCL CD151 COL13A1 FBLIM1 STXBP1 SDC3 CD99L2 NID1 CORO1A LPP PCDH18 NID2 FBLN5 BCL2L11 PDZD2 NPHP1 LPXN ABL2 CADM4 JUP MCAM FN1 PARVA PARVB L1CAM PPFIBP1 FER BMP1 COL5A1 PTK7 ITGA10 FAT3 DCHS1 CD24 SDK2 ITGB1 DDR1 R…	0	0
UP in EWS	9653	anatomical structure morphogenesis	7.1553e-07	64	437	0.146	CPM ERRFI1 NRP1 CSRNP1 FLT1 CXCL8 SERPINE1 FHL1 TNFAIP2 ADM SOBP CELSR3 AMOT LFNG TGM1 KIF5C KDR CASP1 CCN2 CCN1 IER3 NKX3-1 EPHA4 PDGFRA TNFRSF12A ANXA3 ITGA1 DKK1 GEM DCN GREM1 MMP19 COL8A1 CDH13 INA FOXC2 CALCB EPAS1 TUFT1 SEMA3B PDGFB PDGFA BCL10 NTS THBS1 APOLD1 SOCS1 HMOX1 DMD MSX1 JUN TGFB2 ANGPT2 VCAM1 FZD6 LIF VEGFC EVX2 KLF4 COL1A1 NR4A2 KLF5 TPP1 PTX3	0	0	UP in siEF	48869	cellular developmental process	8.6383e-13	223	1392	0.16	SPON2 SERPINE2 SPATA20 F11R LGALS3 EDNRA ALCAM CREB3L2 KDR SOX8 CCN2 SOX9 CCN1 SOX4 CDON EPHA4 MEF2C CXADR UNC5B ISLR2 UNC5C BHLHA15 DKK1 RUNX2 EREG TXNIP ULK2 KCTD11 ULK1 OBSL1 EPAS1 SDC2 PPL SGPL1 CHST11 S100A16 MAP2 RDH10 MYO6 TSPAN2 APOE JUN FZD2 FZD5 GADD45B FZD7 EIF2AK3 FN1 OSGIN1 LIF RAB27A L1CAM DCLK1 COL1A1 PDE3A SDC1 ID3 NRP1 COL18A1 PCSK1 PTPRU TGFB1I1 PTPRO PTPRJ ADM SHB PCSK4 PTPRG C…	0	0	DN in EWS	34737	ergosterol O-acyltransferase activity	0.017531	2	267	0.007	SOAT1 ACAT2	0	0	DN in siEF	7059	chromosome segregation	1.1131e-18	32	873	0.036	TOP2A CDCA5 DSCC1 HJURP NCAPG BRCA1 SKA3 SMC4 NCAPH SMC2 SKA2 CCNB1 PTTG1 NUF2 DLGAP5 DDX11 KNL1 SMC1A ZWINT SGO1 CENPE CENPF KIF18A CENPH ESPL1 INCENP KIFC1 BIRC5 NCAPD2 CENPO NCAPD3 SPC25	0	0	UP in siEF&EEF	48514	blood vessel morphogenesis	1.2387e-12	63	1778	0.035	NRP1 COL18A1 FLT1 B4GALT1 CXCL8 PLAT PTPRJ SHB AMOT EDNRA CDH2 ZMIZ1 LEPR CCN1 JUNB TGM2 ACVR1 ITGA4 TNFRSF12A ANXA2 LMO4 MMP2 HSPG2 PGF TGFBR1 TGFBR2 MMP14 ADAM15 TEP1 COL4A1 ITGA7 MYH9 HOXB3 ITGA5 MFGE8 EPHA2 LAMA5 NOTCH3 FOXC1 CUL7 SEMA3C EPAS1 PDGFA APOLD1 RTN4 ZFP36L1 SGPL1 HMOX1 APOE JUN TGFB2 PRRX1 FN1 LIF VEGFC VEGFA SMAD7 MYO1E KLF5 ID1 CSPG4 PLCD3 FGFR1	0	0
UP in EWS	42127	regulation of cell proliferation	1.0545e-06	50	437	0.114	NRP1 BTG1 FLT1 CXCL8 SERPINE1 ADM ETS1 TNFSF13B TIMP2 KDR RAC2 SOX8 CCN2 CCN1 IL13RA1 NKX3-1 KLF10 PDGFRA CXADR PDCD1LG2 NGF RUNX3 IL1B TXNIP CDH13 TRIB1 ATF3 PTGES CD274 EBI3 PDGFB PDGFA IL20RB PTGS2 THBS1 GPNMB HMOX1 MSX1 S1PR2 TAC1 JUN TGFB2 VCAM1 TNFRSF9 LIF VEGFC KLF4 FOSL2 KLF5 CD24	0	0	UP in siEF	50789	regulation of biological process	1.5955e-12	648	1392	0.465	ZNF296 SERPINE2 MAML2 AVIL SERPINE1 GRPR BACH2 EPS8 SCAMP5 GPR173 ALCAM CREB3L1 CREB3L2 TMEM8B IER3 MEF2C CXADR MBNL2 UNC5B PRKCD FNDC3B MED8 UNC5C BHLHA15 DKK1 DKK3 SIGIRR BCAM HOXB9 PRKAR1B DDIT3 DDIT4 RBP1 TXNIP SPARCL1 SERPING1 HOXB8 MYL9 ATF3 OPTN SKAP2 CFD ZBTB8A CRABP2 FICD CRABP1 PDGFB PDGFA BCL10 SLC5A3 CHST11 PDGFC MYO6 S100A13 HMOX1 KCNMB4 GTF2IRD2B S100A11 S100A10 ABCA1 CDK18 JUN FZD2…	0	0	DN in EWS	34738	lanosterol O-acyltransferase activity	0.017531	2	267	0.007	SOAT1 ACAT2	0	0	DN in siEF	6281	DNA repair	3.2852e-18	59	873	0.067	DCLRE1B TOP2A DCLRE1A FEN1 NUDT1 BCCIP BRCA1 HMGB1 BRCA2 CHAF1B CHAF1A PTTG1 EME1 EXO1 POLE RFC5 PRMT6 SHPRH RFC3 RFC4 LIG1 RFC2 RAD23A LIG3 KIF22 ESCO2 SMC1A NEIL3 FANCD2 DNA2 DTL BLM PCNA PRKDC FAAP24 TYMS POLD3 RAD51AP1 BRIP1 SLX4 POLD1 RBBP8 RAD54L CLSPN FANCI POLQ FANCM XRCC2 FANCA FANCC SSRP1 FANCB FANCG TICRR POLA1 RAD50 POLE2 UBE2N TP73	0	0	UP in siEF&EEF	9887	organ morphogenesis	5.6516e-12	126	1778	0.07	ERRFI1 CSF1 TNC CELSR1 FGFRL1 TGM1 EDNRA ZMIZ1 BSG SOX9 CCN1 PHLDA2 TGM2 ACVR1 TLE1 LMO4 TPM1 ARID5B MAPK8IP3 GEM PGF PRKAR1A HOXB4 HOXB3 HOXB2 ROR2 HOXB8 HOXB7 FREM2 VCL HOXB6 EPHA2 HOXB5 DLX1 NOTCH3 DLX2 COL13A1 TSHZ3 TSHZ1 PDGFA TWIST1 BCL10 SGPL1 BCL2L11 CHST11 PODXL RDH10 MYO6 PLXNA1 WNT3 BBS2 TFAP2A TGFB2 SMAD3 FZD6 LIF PBX1 IGF2R SMAD7 EFNA1 COL1A1 EXT2 BMP1 COL5A1 ID1 COL5A2 SNAI1 SDC1 AL…	0	0
UP in EWS	48583	regulation of response to stimulus	1.0545e-06	37	437	0.084	CXCL8 SERPINE2 SERPINE1 FHL1 CEBPG PDGFB PDGFA IL20RB BCL10 PTGS2 THBS1 TNFSF13B ICAM1 SOCS1 IRAK2 KDR CASP1 HMOX1 FYN A2M TAC1 CD55 IL13RA1 TGFB2 ANGPT2 VEGFC MID1 GREM1 IL1B SERPING1 F2RL1 CDH13 TRIB1 CD24 TLR3 HBEGF TLR2	0	0	UP in siEF	48646	anatomical structure formation involved in morphogenesis	1.7801e-12	76	1392	0.054	NRP1 COL18A1 FLT1 CXCL8 LDB1 TNFAIP2 RORA ADM SHB TSPAN12 CELSR1 FGF1 EDNRA PLAU KDR LEPR CCN2 CCN1 NKX3-2 NKX3-1 TGM2 CDON TNFRSF12A ANXA2 LMO4 MMP2 TPM1 DYRK1B HSPG2 PGF EREG RGMA TGFBR2 TGFBR3 MMP14 CEACAM1 ADAM15 COL4A1 ADAM12 CDH13 COL8A1 ULK1 ROR2 MFGE8 OBSL1 SCG2 CD44 FOXC2 LAMA5 NOTCH3 FOXC1 SEMA3C EPAS1 PDGFA BCL10 THBS1 APOLD1 BCL2L11 PODXL RDH10 HMOX1 WNT3 JUN TGFB2 SMAD3 FZD6 FN1 VEGF…	0	0	DN in EWS	32559	adenyl ribonucleotide binding	0.019128	40	267	0.149	PI4K2B PFKFB4 ACSS2 MVK HSPA4L MAST1 PALM3 TRANK1 CHD3 CHTF18 ADCY7 AK7 PIK3CG KHK HK1 DHX33 PAPOLA IKBKE MYH10 MAP2K5 PSKH1 MAPK3 HSPA8 AMN HSP90AA1 MLKL MMAB ATP11C LIG3 TYK2 ACLY OBSCN MYH3 KIF16B CMPK1 MVD CAMK1 FKBP4 HSPA1B HSPA1A	0	0	DN in siEF	90304	nucleic acid metabolic process	7.4555e-18	153	873	0.175	DCLRE1B DCLRE1A POP1 DSCC1 NUDT1 BCCIP RAX TTF2 ALKBH8 PTTG1 EME1 EPC1 EARS2 TIPIN LIG1 DIMT1 CDKAL1 LIG3 ESCO2 CDC25A WDR77 ARC NEIL3 DKC1 FANCD2 GEMIN4 GEMIN5 DNA2 BLM DNMT1 PRKDC PHB RPAP1 RAD51AP1 BRIP1 EMG1 TERT ORC1 HLTF UTP20 CLSPN VARS1 FANCI CDT1 PRPF38A FANCM BCL11B XRCC2 EAF2 NFATC3 FANCA FANCC IGF1 PA2G4 FANCB FANCG POLA1 LIN28B NASP AGO2 UBE2N CYCS DUS1L TP73 TOP2A RBM28 FEN1 MCM7 SU…	0	0	UP in siEF&EEF	5578	proteinaceous extracellular matrix	5.8453e-12	77	1778	0.043	LGALS3BP ACHE COL18A1 SPARC TNC LAMC1 HAPLN3 LOXL1 LGALS3 ADAMTS3 TIMP2 EMILIN3 EMILIN2 EMILIN1 TIMP1 ADAMTS9 ADAMTS7 WNT5B DST ANXA2 MMP2 P3H1 NPNT HSPG2 MMP11 VCAN CCDC80 COL2A1 MMP16 LOX COL4A2 COL4A1 COL6A2 PXDN MMP17 COL6A1 VWA1 ITGA6 FREM2 MATN2 LAMA5 TNXB COL13A1 LAMA4 COL11A2 LTBP4 FBLN1 LTBP3 NID1 NID2 LTBP1 ADAMTS10 THSD4 FBLN5 ADAMTS15 GPC1 PSAP GPC2 CILP2 GPC6 WNT3 COL26A1 LAMB2 TFPI2…	0	0
UP in EWS	48519	negative regulation of biological process	1.3398e-06	90	437	0.205	HRK ERRFI1 NRP1 BTG1 CXCL8 SERPINE2 SERPINE1 TNFAIP3 ADM ETS1 BBC3 TNFSF13B AMOT RGS4 SESN2 TIMP2 SOX8 IER3 NKX3-1 KLF10 CXADR TNFRSF18 TSC22D3 PDCD1LG2 NGF DKK1 RUNX3 MID1 ASPN GEM RHOB GREM1 TNNT1 DDIT3 IL1B RBP1 DDIT4 TXNIP SERPING1 CDH13 TMBIM6 TRIB3 TRIB1 TLR3 ABCG1 HBEGF PTGES TLR2 PPP1R15A OPRD1 CD274 FOXC2 RGS16 PDGFB GLIS3 PDGFA IL20RB BCL10 PTGS2 FOXO3 HDAC9 THBS1 SOCS1 NUAK2 GPNMB FRZB…	0	0	UP in siEF	48518	positive regulation of biological process	4.3959e-12	268	1392	0.192	OXTR SERPINE2 MAML2 SERPINE1 CBLB ICAM1 IL27RA AQP1 SCAMP5 EDNRA CREB3L2 KDR SOX8 CCN2 SOX9 SYNPO CCN1 SOX4 MEF2C FNDC3B EBF1 ISLR2 BHLHA15 MAPK8IP2 EREG CCDC80 HOXB9 DDIT3 TXNIP SERPING1 TRIB2 ATF3 CFD SLC22A5 SDC4 TSHZ3 EPAS1 EBI3 PDGFB PDGFA BCL10 SEC14L2 APH1B PDGFC MYO6 S100A13 HMOX1 APOE KCNN4 ABCA1 JUN JUP PLK2 FZD7 EIF2AK3 LIF RAB27A NFATC2 L1CAM FOSL2 BST2 FOSL1 EHD1 TNFSF4 GIPC1 ID3 CD2…	0	0	DN in EWS	1883	purine nucleoside binding	0.022432	42	267	0.157	PI4K2B GCDH PFKFB4 ACSS2 MVK HSPA4L MAST1 PALM3 TRANK1 CHD3 CHTF18 ADCY7 AK7 PIK3CG KHK HK1 DHX33 PAPOLA IKBKE MYH10 MAP2K5 PSKH1 MAPK3 HSPA8 AMN HSP90AA1 MLKL MMAB ATP11C LIG3 TYK2 SQLE ACLY OBSCN MYH3 KIF16B CMPK1 MVD CAMK1 FKBP4 HSPA1B HSPA1A	0	0	DN in siEF	70013	intracellular organelle lumen	1.0091e-16	163	873	0.186	RB1 POP1 DSCC1 HJURP TTF2 MKI67 IPO5 CDC20 SOX2 HMGN5 CCND1 EME1 CHEK2 MYB EPC1 OIP5 FBXO5 EARS2 WDHD1 LIG1 ACTN2 DIMT1 DDX11 UBE2E1 VRK1 LIG3 POU3F1 POU3F2 CDC25A OLFM1 ARC DKC1 FANCD2 GRWD1 PSME4 FDX1 PPIF GEMIN4 GEMIN5 MATR3 DNA2 KIF20B ANAPC1 KPNB1 CES1 KMT2D BLM PRKDC PHB PKMYT1 BRIP1 CCNB1 EMG1 DHX33 TERT ORC1 NACC1 ALX4 BRIX1 UTP20 CLSPN PPARGC1B TOE1 PLK4 FANCI HSPA9 NGFR CDT1 FANCM ZBTB1…	0	0	UP in siEF&EEF	9888	tissue development	5.974e-12	142	1778	0.079	ERRFI1 CSF1 TNC F11R CELSR1 ENO3 TGM1 EDNRA BSG CREB3L2 SOX8 SOX9 CCN1 SOX6 JUNB TGM2 ACVR1 CXADR WNT5B IGFBP5 LMO4 TPM1 F2R PRKCA PGF MYL6 BTD PRKAR1A TEP1 COL4A1 NINJ1 HOXB4 TXNIP HOXB3 HOXB2 ROR2 OBSL1 FREM2 VCL EPHA2 HOXB5 NOTCH3 IGSF8 DLX2 CRABP2 TSHZ3 PDGFA TWIST1 BCL10 FAM83H UGCG CHST11 PODXL RDH10 PLXNA1 WNT3 TFAP2A JUN TGFB2 FZD2 SMAD3 JUP FZD6 EIF2AK3 LIF PBX1 SMAD7 COL1A1 EXT2 RCAN1 B…	0	0
UP in EWS	48584	positive regulation of response to stimulus	1.3398e-06	25	437	0.057	CXCL8 SERPINE1 FHL1 CEBPG PDGFB BCL10 PTGS2 THBS1 TNFSF13B IRAK2 KDR CASP1 FYN TAC1 CD55 TGFB2 VEGFC MID1 IL1B SERPING1 F2RL1 CDH13 TLR3 HBEGF TLR2	0	0	UP in siEF	30198	extracellular matrix organization	4.7165e-12	35	1392	0.025	COL18A1 FOXC2 FOXC1 TNXB COL11A1 COL11A2 COL12A1 OLFML2A NID1 CST3 LGALS3 ADAMTS3 CCN2 CCN1 PDGFRA POSTN TGFB2 ANXA2 LAMB2 TGFBR1 COL1A1 COL3A1 CCDC80 COL2A1 COL1A2 LOX COL5A1 COL4A2 COL6A2 COL5A3 BCL3 COL5A2 VWA1 TGFBI RECK	0	0	DN in EWS	1882	nucleoside binding	0.024799	42	267	0.157	PI4K2B GCDH PFKFB4 ACSS2 MVK HSPA4L MAST1 PALM3 TRANK1 CHD3 CHTF18 ADCY7 AK7 PIK3CG KHK HK1 DHX33 PAPOLA IKBKE MYH10 MAP2K5 PSKH1 MAPK3 HSPA8 AMN HSP90AA1 MLKL MMAB ATP11C LIG3 TYK2 SQLE ACLY OBSCN MYH3 KIF16B CMPK1 MVD CAMK1 FKBP4 HSPA1B HSPA1A	0	0	DN in siEF	6139	nucleobase, nucleoside, nucleotide and nucleic acid metabolic process	1.234e-16	172	873	0.197	DCLRE1B SLC23A2 DCLRE1A POP1 DSCC1 NUDT1 BCCIP RAX TTF2 ALKBH8 PNP PTTG1 EME1 EPC1 ENPP1 EARS2 TIPIN LIG1 DIMT1 DDX11 ATP11C CDKAL1 LIG3 ESCO2 KMO CDC25A WDR77 ARC NEIL3 MTHFD1 DKC1 FANCD2 GPD2 GEMIN4 GEMIN5 DNA2 BLM DNMT1 PRKDC PDE1B PHB RPAP1 AK7 RAD51AP1 BRIP1 EMG1 TERT ORC1 FIGNL1 HLTF UTP20 CLSPN VARS1 FANCI CDT1 PRPF38A FANCM BCL11B XRCC2 EAF2 NFATC3 FANCA FANCC IGF1 PA2G4 FANCB PAICS FANCG…	0	0	UP in siEF&EEF	5783	endoplasmic reticulum	6.5663e-12	178	1778	0.1	SLC27A1 GOLT1B CLSTN3 PLOD3 CIB1 ANTXR2 GBA2 ZFYVE1 FADS3 POFUT2 HHAT CREB3L4 CREB3L1 CREB3L2 ADORA1 ARL6IP5 CYP1B1 KIFAP3 TMEM8B EPM2A BNIP3L IL15RA GABARAPL1 SCARA3 ACSL1 PRKCD FNDC3B SHISA5 P3H1 TAP1 CNPY2 PRKCA VASH1 SHISA2 MAPK8IP3 ANK1 MR1 PDIA5 PDIA4 ERN1 CACNB1 DPM3 TMX3 CYP2U1 ASPHD1 CERCAM FKBP7 ASPHD2 KDELR2 FKBP9 KDELR3 PPIB RNF122 ABCG1 RTN4R RTN2 RTN1 H6PD SLC35D1 INSIG2 INSIG1 ITPR…	0	0
UP in EWS	9617	response to bacterium	1.4809e-06	23	437	0.052	JUN ANXA3 CCL20 SERPINE1 LY96 ADM BCL10 FOS VLDLR PTGS2 NGF DCN SOCS1 IRAK2 IL1B BCL3 CYP1A1 CASP1 TRIB1 CD24 TAC1 TLR3 TLR2	0	0	UP in siEF	30334	regulation of cell migration	8.3007e-12	53	1392	0.038	COL18A1 PTPRU FLT1 CSF1 SERPINE2 PTPRO SERPINE1 ICAM1 CXCL16 PLAU ADORA1 KDR IL6R PDGFRB PDGFRA WNT5B IGFBP5 ANXA3 SPHK1 IGFBP3 TPM1 F2R RRAS2 UNC5C VASH1 F3 GREM1 CDH13 ROR2 AJUBA HBEGF CD63 LAMA5 LAMA4 SEMA3A PDGFB PDGFA NEXN PLD1 PTGS2 THBS1 PODXL HMOX1 CCL2 APOE TAC1 TGFB2 SMAD3 VEGFC SMAD7 EFNA1 F2RL1 BCAR1	0	0	DN in EWS	42026	protein refolding	0.02578	3	267	0.011	HSP90AA1 HSPA1B HSPA1A	0	0	DN in siEF	43233	organelle lumen	1.3297e-16	165	873	0.189	RB1 POP1 DSCC1 HJURP TTF2 MKI67 IPO5 CDC20 SOX2 HMGN5 CCND1 EME1 CHEK2 MYB EPC1 OIP5 FBXO5 EARS2 WDHD1 LIG1 ACTN2 DIMT1 DDX11 UBE2E1 VRK1 LIG3 POU3F1 POU3F2 CDC25A OLFM1 ARC DKC1 FANCD2 GRWD1 PSME4 FDX1 PPIF GEMIN4 GEMIN5 MATR3 DNA2 KIF20B ANAPC1 KPNB1 CES1 KMT2D BLM PRKDC PHB PKMYT1 BRIP1 CCNB1 EMG1 DHX33 TERT ORC1 NACC1 ALX4 BRIX1 UTP20 CLSPN PPARGC1B TOE1 PLK4 FANCI HSPA9 NGFR CDT1 FANCM ZBTB1…	0	0	UP in siEF&EEF	44459	plasma membrane part	1.8326e-11	299	1778	0.168	ERRFI1 PATJ OXTR TES SERPINE2 F11R IL27RA EPS8 SCAMP5 GPR176 EDNRA ALCAM GJA3 HOMER3 TNS2 ACVR1 EPHA4 CXADR UNC13A ACTN1 HLA-B HLA-C HLA-A ANK3 MAPK8IP3 ANK1 HLA-E BCAM KCTD10 PARD3 KCTD11 TLN2 KCTD17 ATP6V0D1 OBSL1 KCTD15 STX1A EPHA3 EPHA2 PTGFR SLC22A5 SDC4 SDC2 TPRG1L CD99L2 BCL10 SLC5A3 SYNGR1 SYNGR2 ANKH TSPAN9 MYO6 TSPAN4 ST3GAL5 HMOX1 KCNMB4 APOE BBS2 ABCA1 FZD2 JUP FZD5 HOMER2 FZD6 SLC33A…	0	0
UP in EWS	48522	positive regulation of cellular process	1.7345e-06	89	437	0.203	HRK NRP1 CSRNP1 BTG1 FLT1 SERPINE2 MAML2 SERPINE1 CITED4 ADM ETS1 BBC3 TNFSF13B ICAM1 AMOT BOC KDR RAC2 CASP1 SOX8 CCN2 CCN1 PHLDA1 IL13RA1 BOK KLF10 PDGFRA TNFRSF12A ANXA3 DUSP1 ITGA1 ISLR2 FOS PDCD1LG2 NGF RUNX3 MID1 HOXB9 DDIT3 IL1B IRF1 ARHGEF3 TXNIP CDH13 TRIB3 TRIB1 ATF3 TLR3 HBEGF TLR2 CREB5 CDS1 FOXC2 SDC4 EPAS1 CEBPG EBI3 PDGFB GLIS3 PDGFA BCL10 PTGS2 FOXO3 HDAC9 THBS1 ARNTL APH1B PDGFD …	0	0	UP in siEF	1525	angiogenesis	8.4787e-12	43	1392	0.03	NRP1 COL18A1 FOXC2 LAMA5 NOTCH3 FLT1 CXCL8 EPAS1 TNFAIP2 PDGFA SHB FGF1 THBS1 APOLD1 EDNRA PLAU KDR LEPR HMOX1 CCN2 CCN1 JUN TGFB2 TNFRSF12A ANXA2 MMP2 FN1 VEGFC HSPG2 PGF EREG TGFBR2 MMP14 CEACAM1 KLF5 ADAM15 COL4A1 CDH13 COL8A1 CSPG4 MFGE8 PLCD3 SCG2	0	0	DN in EWS	21510	spinal cord development	0.026821	5	267	0.018	GDF11 PAX7 AKAP5 HOXC10 ROBO1	0	0	DN in siEF	31974	membrane-enclosed lumen	1.8857e-16	167	873	0.191	RB1 POP1 DSCC1 HJURP TTF2 MKI67 IPO5 CDC20 SOX2 HMGN5 CCND1 EME1 CHEK2 MYB EPC1 OIP5 FBXO5 EARS2 WDHD1 LIG1 ACTN2 DIMT1 DDX11 UBE2E1 VRK1 LIG3 POU3F1 POU3F2 CDC25A OLFM1 ARC DKC1 FANCD2 GRWD1 PSME4 FDX1 PPIF GEMIN4 GEMIN5 MATR3 DNA2 KIF20B ANAPC1 KPNB1 CES1 KMT2D BLM PRKDC PHB PKMYT1 BRIP1 CCNB1 EMG1 DHX33 TERT ORC1 NACC1 ALX4 BRIX1 UTP20 CLSPN PPARGC1B TOE1 PLK4 FANCI HSPA9 NGFR CDT1 FANCM ZBTB1…	0	0	UP in siEF&EEF	10646	regulation of cell communication	2.0168e-11	194	1778	0.109	ERRFI1 OXTR TRIO TRAF3IP2 CBLB CCN1 TBC1D10A SOX4 ACVR1 TSPYL2 CPT1A PRKCD RFX3 PRKCA MAPK8IP2 MAPK8IP3 MAPK8IP1 SIGIRR TIAM2 TEP1 DDIT4 TRIB2 STX1A FICD STXBP1 AGAP2 BCL10 SYNGR1 CHST11 TSPAN6 MYO6 S100A13 HMOX1 KCNMB4 APOE RALGDS JUP IQSEC2 PLK2 EIF2AK3 LIF L1CAM CYLD GIPC1 ID1 CD24 RGL2 TMEM9B CDKN1C ACHE SLC44A2 TGFB1I1 SIPA1L2 LITAF AKAP12 AKAP13 TIMP2 LMCD1 RAB8B SPHK1 DENND2B MST1 GMIP DUS…	0	0
UP in EWS	2682	regulation of immune system process	2.0285e-06	32	437	0.073	CD274 SERPINE1 FHL1 EBI3 IL20RB BCL10 FOXO3 ETS1 THBS1 TNFSF13B ICAM1 IRAK2 HMOX1 FYN A2M TAC1 CD55 IL13RA1 KLF10 JUN TGFB2 VCAM1 LIF VEGFC PDCD1LG2 GREM1 IL1B SERPING1 F2RL1 CD24 TLR3 TLR2	0	0	UP in siEF	43062	extracellular structure organization	1.2733e-11	44	1392	0.031	COL18A1 FOXC2 FOXC1 TNXB COL11A1 COL11A2 COL12A1 TNC NRXN2 OLFML2A NID1 CST3 LGALS3 ADAMTS3 CDH2 MYO6 ERBB2 CCN2 CCN1 PDGFRA POSTN TGFB2 ANXA2 LAMB2 F2R PCDHB11 TGFBR1 DNM3 COL1A1 COL3A1 CCDC80 COL2A1 COL1A2 PCDHB2 LOX COL5A1 COL4A2 COL6A2 COL5A3 BCL3 COL5A2 VWA1 TGFBI RECK	0	0	DN in EWS	30258	lipid modification	0.028036	6	267	0.022	AMN SOAT1 B4GALNT1 OCRL ACAT2 PIK3CG	0	0	DN in siEF	5819	spindle	1.0086e-15	40	873	0.045	RB1 RIF1 KIF14 BUB1B KIF11 SKA3 AURKB KIF15 AURKA SKA2 CDC20 CCNB1 RACGAP1 KNTC1 FBXO5 FAM83D BUB1 DLGAP5 DYNC1I1 SPAG5 HAUS4 KIF23 HAUS6 KIF22 RANGAP1 MZT1 SGO1 CENPE ASPM TPX2 CENPF KIF18A INCENP KIFC1 KIF4A BIRC5 TUBGCP3 TUBGCP4 KIF20B CALM1	0	0	UP in siEF&EEF	48646	anatomical structure formation involved in morphogenesis	2.5366e-11	86	1778	0.048	NRP1 COL18A1 BMPR2 FLT1 B4GALT1 CXCL8 LDB1 RORA ADM SHB TSPAN12 CELSR1 GLI2 EDNRA LEPR CAPN2 CCN1 JUNB NKX3-2 NKX3-1 TGM2 CDON ACVR1 TNFRSF12A ANXA2 LMO4 MMP2 TPM1 SHROOM3 DYRK1B HSPG2 PGF RGMA TGFBR2 TGFBR3 MMP14 ADAM15 PRKAR1A TEP1 COL4A1 MYH9 HOXB3 ROR1 ULK1 ITGA5 ROR2 MFGE8 OBSL1 EPHA2 LAMA5 NOTCH3 FOXC1 SEMA3C EPAS1 PDGFA TWIST1 BCL10 APOLD1 RTN4 BCL2L11 PODXL RDH10 HMOX1 WNT3 BBS2 TFAP2A JU…	0	0
UP in EWS	5615	extracellular space	2.7571e-06	45	437	0.102	FLT1 CXCL8 SERPINE2 SERPINE1 COL12A1 FHL1 EBI3 TNFAIP2 PDGFA LY96 ADM VLDLR FSTL1 THBS1 FBLN5 TNFSF13B ICAM1 LOXL2 FRZB LIPH HMOX1 CCN2 APOL1 IL13RA2 A2M TAC1 ANGPT2 VCAM1 TSLP CCL20 COL25A1 GDF15 MMP3 LIF VEGFC LSR NGF MMP10 DCN COL1A1 GREM1 VGF IL1B CDH13 HBEGF	0	0	UP in siEF	1501	skeletal system development	2.3119e-11	68	1392	0.048	SPARC COL12A1 SIX1 LGALS3 CTSO TRPS1 CREB3L2 SOX8 CCN2 OSTF1 SOX9 NKX3-2 CMKLR1 PDGFRB PDGFRA POSTN WNT5B ANXA2 IGFBP4 MMP2 ARID5B ASPN RUNX2 TGFBR1 TGFBR2 MMP14 ZEB1 COL2A1 HOXB9 ROR2 HOXB8 SCG2 MATN3 FOXC2 DLX2 FOXC1 TUFT1 LRRC17 COL11A2 PRELP AEBP1 PTN LTBP3 PTGS2 FSTL3 SGPL1 GPNMB CHST11 FRZB RDH10 SPP1 CYTL1 PDLIM7 TBX1 SMAD3 EYA1 PRRX1 EIF2AK3 COL1A1 COL3A1 COL1A2 BMP1 MGP COL5A2 ALPL TPP1 …	0	0	DN in EWS	6986	response to unfolded protein	0.03219	6	267	0.022	HSPA8 HSP90AA1 VAPB HSPA4L HSPA1B HSPA1A	0	0	DN in siEF	44424	intracellular part	2.2228e-15	653	873	0.747	RB1 IPO11 POP1 RAX TMEM97 ENO2 SMC4 ALKBH8 SMC2 DCAF1 PREX1 LIPE RAVER1 NDST4 PSMD3 RAVER2 MYB ANKFY1 AP1S3 GTSE1 EARS2 WDHD1 NUP210 FNBP1 DAPK1 PRKCB DDX11 RFX2 PASK ISL1 PHKA2 WDR77 ARMC1 MTHFD1 PSME4 FDX1 PADI2 PRKD1 ASF1B PIF1 ENPEP NUP205 CDCA2 CDCA3 SRCAP CDCA4 PRKDC CDCA5 CDCA7 NCAPG THY1 SKA3 NCAPH SKA2 CYB5R2 RRP7A HSPH1 TERT ALX4 NUP88 HMGXB3 PPARGC1B NR2C2AP NKX2-2 GSTM4 TOE1 NAA50 PLK…	0	0	UP in siEF&EEF	42981	regulation of apoptosis	4.6717e-11	153	1778	0.086	TRIO CLU NRBP2 DPF1 ADORA1 PIM1 SOX9 IL6R SOX4 MAP3K5 TGM2 IER3 PHLDA3 SH3GLB1 ACVR1 BNIP3L CARD10 MEF2C ACTN1 DAPK3 F2R SHISA5 PRKCA ACTN4 MAPK8IP1 TIAM2 ERN1 ADAM17 TEP1 DDIT3 TXNIP SQSTM1 DLX1 BEX3 BCL10 FOXO3 FOXO1 RTN4 HSP90B1 STK3 PRDX5 BCL2L11 APH1B NUAK2 CHST11 PSAP HMOX1 PMAIP1 BMF APOE PRNP JUN TGFB2 SMAD3 HSPA5 WFS1 EIF2AK3 RAB27A IGF2R TNFRSF10D FOSL1 NR4A2 TP53I3 BCL3 JMY MAP3K10 ID3…	0	0
UP in EWS	48545	response to steroid hormone stimulus	3.8258e-06	22	437	0.05	PDGFRA TGFB2 ANXA3 DUSP1 SERPINE1 PDGFB PDGFA ADM FOS PTGS2 NGF THBS1 COL1A1 SOCS1 IL1B TXNIP HMOX1 CCN2 CCN1 A2M CD24 TLR2	0	0	UP in siEF	7399	nervous system development	2.9961e-11	161	1392	0.115	SPON2 OXTR SERPINE2 AVIL RORA KLHL35 CELSR1 FGF1 CELSR3 AQP1 ALCAM DPYSL4 CDH2 KIF5C TUBB3 ADORA1 SOX8 SOX9 RGS9 LZTS1 MYLIP EPHA4 PDGFRA SEMA6C PHYH MEF2C WNT5B UNC5B LMO4 TMOD2 ISLR2 UNC5C DKK1 BTD SCN8A NINJ1 S100A6 ULK2 KCTD11 ULK1 ROR2 HOXB8 RTN4R NOTCH3 DLX2 SEMA7A RTN1 BRI3 SDC2 NTM DTX1 BCL10 EFNA5 SLC5A3 PCDH18 NPAS2 GLIS2 PCSK1N MAP2 PDGFC MYO6 PSAP TSPAN2 APOE ZNF423 PLXNA4 WNT3 PLXNA3…	0	0	DN in EWS	8150	biological_process	0.036222	235	267	0.88	SLC23A2 TMEM97 IKZF4 TXNDC17 BAIAP2L2 LSM11 ARL6IP5 RCC1 NUP214 GAMT MBNL1 COG6 ANK2 P3H3 GTPBP3 SOAT1 EWSR1 PADI2 KCTD12 CES2 PFN2 GCDH ZNF324B HSPA4L TRANK1 PLA2G3 TRMT2B MRPL10 TSPAN6 SLC19A3 B4GALNT1 FDFT1 GSTM4 GSTM2 PRRT2 IFI44 AMMECR1 SQLE ANLN PPP1R1A FASN NDUFAF3 PLCH1 SFXN2 PCDHB8 BARHL2 SETD7 HOXC10 CYB561D2 ROBO1 KHK GYS1 VMO1 RAC3 EMB NEFH IKBKE GARNL3 PRMT6 PCYT1B DBNL ELOVL4 EXOC7 …	0	0	DN in siEF	30554	adenyl nucleotide binding	3.3728e-15	154	873	0.176	DGKG ERCC6L BUB1B TTF2 MKI67 ABCA13 SMC4 SMC2 CHEK2 SACS ENPP1 MAP3K4 EARS2 EPHA5 EPHA7 LIG1 DAPK1 PRKCB DDX11 MYH15 UBE2E1 ATP11C VRK1 LIG3 HASPIN KMO PASK UHMK1 MELK MTHFD1 KATNAL1 PRKD1 DNA2 KIF20B FKBP4 DGKK STEAP1 STEAP2 IPPK PIF1 BLM SRCAP PRKDC ARX PKMYT1 KALRN AK7 BRIP1 HSPH1 NDOR1 DHX33 GRK5 ORC1 FIGNL1 HLTF DHX37 NLRP2 MDN1 VARS1 MAP2K6 PLK4 HSPA9 TRAP1 HSPA8 DNAH10 ABCA5 FANCM XRCC2 PL…	0	0	UP in siEF&EEF	10941	regulation of cell death	4.6717e-11	155	1778	0.087	TRIO CLU NRBP2 FTH1 DPF1 ADORA1 PIM1 SOX9 IL6R SOX4 MAP3K5 TGM2 IER3 PHLDA3 SH3GLB1 ACVR1 BNIP3L CARD10 MEF2C ACTN1 DAPK3 F2R SHISA5 PRKCA ACTN4 MAPK8IP1 TIAM2 ERN1 ADAM17 TEP1 DDIT3 TXNIP SQSTM1 DLX1 BEX3 BCL10 FOXO3 FOXO1 RTN4 HSP90B1 STK3 PRDX5 BCL2L11 APH1B NUAK2 CHST11 PSAP HMOX1 PMAIP1 BMF APOE PRNP JUN TGFB2 SMAD3 HSPA5 WFS1 EIF2AK3 RAB27A IGF2R TNFRSF10D FOSL1 NR4A2 TP53I3 BCL3 JMY MAP3K1…	0	0
UP in EWS	10955	negative regulation of protein maturation by peptide bond cleavage	4.7188e-06	5	437	0.011	SERPINE2 SERPINE1 SERPING1 A2M THBS1	0	0	UP in siEF	5509	calcium ion binding	3.5332e-11	103	1392	0.073	SPARC CLSTN3 PROS1 DGKA TNC CBLB CELSR1 CELSR3 CDH6 EFEMP2 CDH2 CCN1 CUBN S100A2 ACTN1 PCDHA12 NPNT MYL6 S100A6 FKBP7 SPARCL1 S100A4 FKBP9 S100A3 MYL9 NOTCH3 LTBP4 LPL FBLN1 LTBP3 NID1 PCDH18 LTBP1 NID2 FBLN5 SCUBE3 S100A16 S100A13 RAB11FIP4 S100A11 S100A10 HSPA5 EDEM2 SYT7 AIF1L EHD1 EHD2 EHD3 MEX3B BMP1 PCDHB2 FAT3 LRP10 FBN1 NRP1 SNED1 PIK3CD SGCE EFCAB2 ME3 APC2 ANXA2 SSR4 ANXA3 HEG1 ANXA4 MS…	0	0	DN in EWS	34433	steroid esterification	0.036222	2	267	0.007	SOAT1 ACAT2	0	0	DN in siEF	43234	protein complex	4.2533e-15	220	873	0.252	RB1 POP1 CCNF DNHD1 ENO2 SMC4 SMC2 CDC20 SOX2 PSMD3 EPC1 DPF3 AP1S3 GTSE1 TP63 NUP210 ACTN2 KNL1 PHKA2 KATNAL1 PSME4 KCTD12 KIF20B NUP205 TTYH2 SRCAP EPB41 PRKDC NCAPG PIK3R1 SKA3 NCAPH SKA2 CD79A C5 RACGAP1 KCNN1 ALX4 NUP88 PPARGC1B DNAH10 PLK1 EXOC6B EAF2 IGF1 ZWINT GPN3 CCT6A POLA1 TPX2 AGO2 STRN CALM1 EZH2 TOP2A RYR2 SUV39H1 KIF14 BRCA1 KIF11 BRCA2 JPH1 MYOM2 KIF15 RPTOR CHAF1B TUBA1B CHAF1A …	0	0	UP in siEF&EEF	32501	multicellular organismal process	6.3383e-11	565	1778	0.317	ZNF296 SERPINE2 AVIL ABAT F11R ENO3 FGFRL1 EPS8 GPR176 ALCAM DPYSL4 GJA3 ZMIZ1 CREB3L4 CREB3L2 CYP1B1 JUNB RNF111 MEF2C CXADR UNC5B ZNF160 SERPINF1 PRKCD DAPK3 RFX3 UNC5C PRKCA HSPG2 BCAM MYL6 HOXB9 PRKAR1B PRKAR1A TEP1 BIN1 DDIT3 PARD3 GPR161 HOXB4 TXNIP HOXB3 SPIN2B HOXB2 HOXB8 HOXB7 FREM2 HOXB6 HOXB5 COL13A1 CRABP2 FLII SHOX2 PDGFA BCL10 SLC5A3 DYNC2LI1 CHST11 PRKAR2B RDH10 PDGFC MYO6 SERPINH1…	0	0
UP in EWS	32101	regulation of response to external stimulus	4.8589e-06	20	437	0.045	ANGPT2 CXCL8 SERPINE2 SERPINE1 PDGFB PDGFA IL20RB VEGFC PTGS2 THBS1 GREM1 IL1B KDR SERPING1 F2RL1 CDH13 A2M TAC1 TLR3 TLR2	0	0	UP in siEF	5886	plasma membrane	4.3952e-11	402	1392	0.288	PATJ SERPINE2 SERPINE1 MRGPRF F11R GRPR EPS8 SCAMP5 GPR173 GPR176 ALCAM HOMER3 CMKLR1 TMEM8B ANKS1B CUBN CXADR UNC13A PRKCD DKK1 BCAM CLDN4 SKAP2 BCL10 SLC5A3 EPB41L1 MYO6 HMOX1 ST3GAL5 KCNMB4 ABCA1 FZD2 JUP FZD5 MCAM ABCA3 FZD7 ABCA4 FZD6 L1CAM GRIN2C AIF1L EHD1 COL1A1 EHD2 CYLD PPFIBP1 EHD3 COL1A2 PCDHB2 LYPD6B TNFSF4 SSPN FAT3 FXYD6 TGFB1I1 SHB LRRC32 ASGR1 PANX2 JPH2 CGNL1 APC2 ANXA2 ANXA3 SP…	0	0	DN in EWS	34434	sterol esterification	0.036222	2	267	0.007	SOAT1 ACAT2	0	0	DN in siEF	5515	protein binding	4.4894e-15	519	873	0.594	RB1 IPO11 PGLYRP2 POP1 RAX TMEM97 ENO2 CLDN1 SMC4 ALKBH8 SMC2 DCAF1 PREX1 LIPE RAVER1 PSMD3 RAVER2 MYB C3AR1 ANKFY1 AP1S3 UNC5A NUP210 FNBP1 DAPK1 PRKCB SYTL5 PASK PHKA2 WDR77 MTHFD1 FDX1 PRKD1 ASF1B NUP205 TTYH2 SRCAP PRKDC CDCA5 NCAPG THY1 SKA3 SKA2 C5 TERT ALX4 PPARGC1B NKX2-2 NAA50 PLK4 FZD1 NGFR SNAPIN FZD4 PLK1 NFATC3 NR0B1 PA2G4 FLI1 AGO2 REL SFXN1 STRN EZH2 RET LRRC34 LRRC10B LRRC4 GLI1 P…	0	0	UP in siEF&EEF	30334	regulation of cell migration	6.3383e-11	59	1778	0.033	COL18A1 PTPRU CLIC4 BMPR2 FLT1 CSF1 SERPINE2 WDR44 AMOT CXCL16 ADORA1 IL6R WNT5B IGFBP5 ANXA3 SPHK1 ITGA2 TPM1 F2R ADAM10 RRAS2 UNC5C VASH1 F3 CREB3 ADAM17 TEP1 ROR2 AJUBA VCL EPHA2 HBEGF CD63 LAMA5 LAMA4 SEMA3A PDGFA NEXN FURIN PLD1 PTGS2 CORO1A RTN4 PODXL PDPN HMOX1 APOE TGFB2 MAP3K1 SMAD3 VEGFC LAMB1 VEGFA SMAD7 EFNA1 DLC1 F2RL1 NF2 BCAR1	0	0
UP in EWS	32501	multicellular organismal process	5.1262e-06	157	437	0.359	ERRFI1 SERPINE2 SERPINE1 COL12A1 F11R CELSR3 AMOT CLGN EPS8 TGM1 HHAT KIF5C LIPH KDR SOX8 CCN2 FAM3C CCN1 EPHA4 PDGFRA CXADR ISLR2 SHISA2 NPNT DKK1 MID1 HIC1 GEM HOXB9 DDIT3 TXNIP SERPING1 COL8A1 CDS1 BEX2 NDRG4 RTN1 CALCB SDC4 EPAS1 PDGFB ITPR1 PDGFA IL20RB BCL10 FOXO3 NTS SDCBP SOCS1 HMOX1 TSPAN2 NPTX2 TAC1 DRD4 JUN TGFB2 VCAM1 GADD45B FZD6 PBX3 LIF NEB EVX2 COL1A1 NR4A2 RCAN1 BST1 COL5A3 MAFF …	0	0	UP in siEF	7166	cell surface receptor linked signaling pathway	4.6848e-11	173	1392	0.124	IFITM1 OXTR COL16A1 MAML2 GPR68 DGKA PLAT CBLB CELSR1 GRPR FGF1 CELSR3 IL27RA EPS8 GPR176 EDNRA ADORA1 KDR LEPR HOMER3 CCN2 IL6R RGS9 SOX4 TGM2 CMKLR1 IL13RA1 CDON TLE4 PDGFRB EPHA4 PDGFRA WNT5B APLP2 F2R ARID5B BHLHA15 MAPK8IP2 GEM EREG TXNIP ROR2 EPHA3 CFD CD274 NOTCH3 PTGFR NXPH4 PDGFB PDGFA PIK3R3 DTX1 BCL10 LTBP3 DTX4 FOXO1 HRH1 SGPL1 PCSK1N SOCS1 APH1B IRAK2 STC2 PDGFC PENK TNFRSF14 APOE TA…	0	0	DN in EWS	34435	cholesterol esterification	0.036222	2	267	0.007	SOAT1 ACAT2	0	0	DN in siEF	5524	ATP binding	6.8001e-15	146	873	0.167	DGKG ERCC6L BUB1B TTF2 MKI67 ABCA13 SMC4 SMC2 CHEK2 SACS ENPP1 MAP3K4 EARS2 EPHA5 EPHA7 LIG1 DAPK1 PRKCB DDX11 MYH15 UBE2E1 ATP11C VRK1 LIG3 HASPIN PASK UHMK1 MELK MTHFD1 KATNAL1 PRKD1 DNA2 KIF20B FKBP4 DGKK IPPK PIF1 BLM SRCAP PRKDC ARX PKMYT1 KALRN AK7 BRIP1 HSPH1 DHX33 GRK5 ORC1 FIGNL1 HLTF DHX37 NLRP2 MDN1 VARS1 MAP2K6 PLK4 HSPA9 TRAP1 HSPA8 DNAH10 ABCA5 FANCM XRCC2 PLK1 PAICS CCT6A TPX2 KIF1…	0	0	UP in siEF&EEF	1501	skeletal system development	7.1064e-11	78	1778	0.043	ACHE RARG SPARC SIX1 PKD1 FGFRL1 GLI2 LGALS3 CTSO SIX4 TRPS1 CREB3L2 SOX8 OSTF1 SOX9 SOX6 JUNB NKX3-2 WNT5B ANXA2 IGFBP4 MMP2 ARID5B PRKCA TGFBR1 TGFBR2 MMP14 ZEB1 COL2A1 HOXB9 HOXB4 HOXB3 HOXB2 ROR2 HOXB8 HOXB7 HOXB6 EPHA2 HOXB5 DLX1 DLX2 FOXC1 COL13A1 TUFT1 SATB2 SHOX2 COL11A2 TWIST1 LTBP3 PTGS2 FSTL3 SGPL1 ANKH CHST11 RDH10 MSX1 MEF2D PDLIM7 TBX1 TFAP2A WWTR1 SMAD3 EYA1 PRRX1 EIF2AK3 KAZALD1 P…	0	0
UP in EWS	42981	regulation of apoptosis	6.3737e-06	48	437	0.109	HRK CDS1 NRP1 FOXC2 BEX2 BTG1 SERPINE1 CEBPG TNFAIP3 BCL10 PTGS2 FOXO3 ETS1 THBS1 BBC3 TNFSF13B HERPUD1 NUAK2 APH1B CASP1 HMOX1 CCN2 MSX1 PRODH PHLDA1 IER3 BOK CARD10 JUN TGFB2 DUSP1 TNFRSF9 TNFRSF18 TSC22D3 ITGA1 NGF RUNX3 NR4A2 DDIT3 IL1B BCL3 JMY ARHGEF3 TXNIP CDH13 TMBIM6 CD24 TLR2	0	0	UP in siEF	40012	regulation of locomotion	5.5534e-11	55	1392	0.039	COL18A1 PTPRU FLT1 CXCL8 CSF1 SERPINE2 PTPRO SERPINE1 ICAM1 CXCL16 PLAU ADORA1 KDR IL6R PDGFRB PDGFRA WNT5B IGFBP5 ANXA3 SPHK1 IGFBP3 TPM1 F2R RRAS2 UNC5C VASH1 F3 GREM1 CDH13 ROR2 AJUBA SCG2 HBEGF CD63 LAMA5 LAMA4 SEMA3A PDGFB PDGFA NEXN PLD1 PTGS2 THBS1 PODXL HMOX1 CCL2 APOE TAC1 TGFB2 SMAD3 VEGFC SMAD7 EFNA1 F2RL1 BCAR1	0	0	DN in EWS	10742	macrophage derived foam cell differentiation	0.036222	2	267	0.007	SOAT1 ACAT2	0	0	DN in siEF	1882	nucleoside binding	7.8535e-15	156	873	0.178	DGKG ERCC6L BUB1B TTF2 MKI67 ABCA13 SMC4 SMC2 PNP CHEK2 SACS ENPP1 MAP3K4 EARS2 EPHA5 EPHA7 LIG1 DAPK1 PRKCB DDX11 MYH15 UBE2E1 ATP11C VRK1 LIG3 HASPIN KMO PASK UHMK1 MELK MTHFD1 KATNAL1 PRKD1 DNA2 KIF20B FKBP4 DGKK STEAP1 STEAP2 IPPK PIF1 BLM SRCAP PRKDC ARX PKMYT1 KALRN AK7 BRIP1 HSPH1 NDOR1 DHX33 GRK5 ORC1 FIGNL1 HLTF DHX37 NLRP2 MDN1 VARS1 MAP2K6 PLK4 HSPA9 TRAP1 HSPA8 DNAH10 ABCA5 FANCM XRCC…	0	0	UP in siEF&EEF	40012	regulation of locomotion	8.4758e-11	63	1778	0.035	ROBO2 COL18A1 PTPRU CLIC4 BMPR2 FLT1 CXCL8 CSF1 SERPINE2 WDR44 AMOT CXCL16 ADORA1 IL6R WNT5B IGFBP5 ANXA3 SPHK1 ITGA2 TPM1 F2R ADAM10 RRAS2 UNC5C PRKCA VASH1 F3 CREB3 ADAM17 TEP1 ROR2 AJUBA VCL EPHA2 HBEGF CD63 LAMA5 LAMA4 SEMA3A PDGFA NEXN FURIN PLD1 PTGS2 CORO1A RTN4 PODXL PDPN HMOX1 APOE BBS2 TGFB2 MAP3K1 SMAD3 VEGFC LAMB1 VEGFA SMAD7 EFNA1 DLC1 F2RL1 NF2 BCAR1	0	0
UP in EWS	50794	regulation of cellular process	6.3737e-06	206	437	0.471	ERRFI1 SERPINE2 MAML2 SERPINE1 BACH2 ICAM1 EPS8 KDR SOX8 CCN2 CCN1 CCNL1 IER3 EPHA4 CXADR MBNL2 ISLR2 DKK1 RUNX3 HOXB9 PPP1R3C DDIT3 RBP1 DDIT4 TXNIP TRIB3 TRIB1 ATF3 PTGES CDS1 BEX2 SDC4 EPAS1 EBI3 PDGFB PDGFA IL20RB BCL10 ZNF829 NUAK2 APH1B PDGFD HMOX1 S100A10 JUN GADD45B GADD45A PBX3 LIF ELL2 FOSL2 COL1A1 CYP1A1 PKIG CD24 HRK NRP1 CSRNP1 BTG1 CAB39L CITED4 ADM VLDLR BBC3 HERPUD1 JPH2 TIMP2 ANK…	0	0	UP in siEF	30199	collagen fibril organization	7.6433e-11	17	1392	0.012	FOXC2 FOXC1 TGFB2 ANXA2 COL11A1 COL11A2 COL12A1 TGFBR1 COL1A1 COL3A1 COL2A1 ADAMTS3 COL1A2 LOX COL5A1 COL5A3 COL5A2	0	0	DN in EWS	44183	protein binding involved in protein folding	0.036222	2	267	0.007	HSPA1B HSPA1A	0	0	DN in siEF	32559	adenyl ribonucleotide binding	1.0675e-14	147	873	0.168	DGKG ERCC6L BUB1B TTF2 MKI67 ABCA13 SMC4 SMC2 CHEK2 SACS ENPP1 MAP3K4 EARS2 EPHA5 EPHA7 LIG1 DAPK1 PRKCB DDX11 MYH15 UBE2E1 ATP11C VRK1 LIG3 HASPIN PASK UHMK1 MELK MTHFD1 KATNAL1 PRKD1 DNA2 KIF20B FKBP4 DGKK IPPK PIF1 BLM SRCAP PRKDC ARX PKMYT1 KALRN AK7 BRIP1 HSPH1 DHX33 GRK5 ORC1 FIGNL1 HLTF DHX37 NLRP2 MDN1 VARS1 MAP2K6 PLK4 HSPA9 TRAP1 HSPA8 DNAH10 ABCA5 FANCM XRCC2 PLK1 PAICS CCT6A TPX2 KIF1…	0	0	UP in siEF&EEF	23051	regulation of signaling process	8.7209e-11	142	1778	0.079	ERRFI1 TRIO CSF1 TRAF3IP2 GOLT1B CD81 RGS2 CDH2 LEPR CIR1 MAP3K6 IL6R RGS9 TBC1D10A MAP3K5 TGM2 PHLDA3 ACVR1 TSPYL2 CARD10 PRKCD F2R SHISA5 PRKCA MAPK8IP2 MAPK8IP3 MID1 MAPK8IP1 SIGIRR TIAM2 ADAM17 TEP1 DDIT4 TBC1D23 TRIB2 SQSTM1 TBC1D19 FICD AGAP2 BCL10 RASAL2 FOXO1 IRAK2 TSPAN6 PSAP S100A13 HMOX1 APOE TBC1D17 RALGDS TGFB2 IQSEC2 NEK6 PLK2 EIF2AK3 LIF L1CAM ADAP1 EFNA1 ID1 MAP3K10 NF2 CD24 MAP3K…	0	0
UP in EWS	10942	positive regulation of cell death	6.3737e-06	32	437	0.073	HRK CDS1 NRP1 CEBPG BCL10 PTGS2 FOXO3 ETS1 THBS1 BBC3 APH1B CASP1 HMOX1 CCN2 PRODH PHLDA1 BOK JUN TGFB2 DUSP1 TNFRSF9 ITGA1 NGF RUNX3 DDIT3 IL1B BCL3 JMY ARHGEF3 TXNIP CD24 TLR2	0	0	UP in siEF	6950	response to stress	7.9175e-11	221	1392	0.158	ERRFI1 SPON2 OXTR AVIL SERPINE1 F11R IL27RA AQP1 SCAMP5 EDNRA CREB3L1 DHX58 CREB3L2 FBXO6 CCN2 CCN1 RSAD2 HLA-B MAPK8IP1 EREG SIGIRR DDIT3 DDIT4 NINJ1 TXNIP SERPING1 NEIL1 EPHA3 CFD NLRX1 EPAS1 SDC2 PDGFB PDGFA BCL10 NUAK2 MYO6 PENK HMOX1 APOE KCNN4 A2M JUN APOBEC3F APOBEC3G GADD45B GADD45A FZD7 EDEM2 EIF2AK3 FN1 RAB27A GRIN2C FOSL1 COL1A1 TNFSF4 SDC1 ID3 CD24 HRK NRP1 COL18A1 PCSK1 BTG1 ADM LYST…	0	0	DN in EWS	90077	foam cell differentiation	0.036222	2	267	0.007	SOAT1 ACAT2	0	0	DN in siEF	5622	intracellular	1.1243e-14	666	873	0.762	RB1 IPO11 PGLYRP2 POP1 RAX TMEM97 ENO2 SMC4 ALKBH8 SMC2 DCAF1 PREX1 LIPE RAVER1 NDST4 PSMD3 RAVER2 MYB ANKFY1 AP1S3 GTSE1 EARS2 WDHD1 NUP210 FNBP1 DAPK1 PRKCB DDX11 RFX2 PASK ISL1 PHKA2 WDR77 ARMC1 DEPDC1B MTHFD1 PSME4 FDX1 PADI2 PRKD1 ASF1B PIF1 ENPEP NUP205 CDCA2 CDCA3 SRCAP CDCA4 PRKDC CDCA5 CDCA7 NCAPG THY1 SKA3 NCAPH SKA2 CYB5R2 RRP7A HSPH1 TERT ALX4 NUP88 HMGXB3 PPARGC1B NR2C2AP NKX2-2 GSTM…	0	0	UP in siEF&EEF	43067	regulation of programmed cell death	8.7611e-11	153	1778	0.086	TRIO CLU NRBP2 DPF1 ADORA1 PIM1 SOX9 IL6R SOX4 MAP3K5 TGM2 IER3 PHLDA3 SH3GLB1 ACVR1 BNIP3L CARD10 MEF2C ACTN1 DAPK3 F2R SHISA5 PRKCA ACTN4 MAPK8IP1 TIAM2 ERN1 ADAM17 TEP1 DDIT3 TXNIP SQSTM1 DLX1 BEX3 BCL10 FOXO3 FOXO1 RTN4 HSP90B1 STK3 PRDX5 BCL2L11 APH1B NUAK2 CHST11 PSAP HMOX1 PMAIP1 BMF APOE PRNP JUN TGFB2 SMAD3 HSPA5 WFS1 EIF2AK3 RAB27A IGF2R TNFRSF10D FOSL1 NR4A2 TP53I3 BCL3 JMY MAP3K10 ID3…	0	0
UP in EWS	10595	positive regulation of endothelial cell migration	7.4872e-06	8	437	0.018	ANXA3 PDGFB KDR VEGFC PTGS2 HDAC9 THBS1 AMOT	0	0	UP in siEF	48407	platelet-derived growth factor binding	8.3523e-11	11	1392	0.007	COL1A1 PDGFRB PDGFRA COL3A1 COL2A1 COL1A2 COL5A1 COL4A1 COL6A1 PDGFB PDGFA	0	0	DN in EWS								0	0	DN in siEF	1883	purine nucleoside binding	2.2233e-14	154	873	0.176	DGKG ERCC6L BUB1B TTF2 MKI67 ABCA13 SMC4 SMC2 CHEK2 SACS ENPP1 MAP3K4 EARS2 EPHA5 EPHA7 LIG1 DAPK1 PRKCB DDX11 MYH15 UBE2E1 ATP11C VRK1 LIG3 HASPIN KMO PASK UHMK1 MELK MTHFD1 KATNAL1 PRKD1 DNA2 KIF20B FKBP4 DGKK STEAP1 STEAP2 IPPK PIF1 BLM SRCAP PRKDC ARX PKMYT1 KALRN AK7 BRIP1 HSPH1 NDOR1 DHX33 GRK5 ORC1 FIGNL1 HLTF DHX37 NLRP2 MDN1 VARS1 MAP2K6 PLK4 HSPA9 TRAP1 HSPA8 DNAH10 ABCA5 FANCM XRCC2 PL…	0	0	UP in siEF&EEF	9966	regulation of signal transduction	1.0623e-10	141	1778	0.079	ERRFI1 TRIO CSF1 TRAF3IP2 GOLT1B CD81 RGS2 CDH2 LEPR CIR1 MAP3K6 IL6R RGS9 TBC1D10A MAP3K5 TGM2 PHLDA3 ACVR1 TSPYL2 CARD10 PRKCD F2R SHISA5 PRKCA MAPK8IP2 MAPK8IP3 MID1 MAPK8IP1 SIGIRR TIAM2 ADAM17 TEP1 DDIT4 TBC1D23 TRIB2 SQSTM1 TBC1D19 FICD AGAP2 BCL10 RASAL2 FOXO1 IRAK2 TSPAN6 PSAP S100A13 HMOX1 APOE TBC1D17 RALGDS TGFB2 IQSEC2 NEK6 PLK2 EIF2AK3 LIF L1CAM ADAP1 EFNA1 ID1 MAP3K10 NF2 CD24 MAP3K…	0	0
UP in EWS	43067	regulation of programmed cell death	7.8251e-06	48	437	0.109	HRK CDS1 NRP1 FOXC2 BEX2 BTG1 SERPINE1 CEBPG TNFAIP3 BCL10 PTGS2 FOXO3 ETS1 THBS1 BBC3 TNFSF13B HERPUD1 NUAK2 APH1B CASP1 HMOX1 CCN2 MSX1 PRODH PHLDA1 IER3 BOK CARD10 JUN TGFB2 DUSP1 TNFRSF9 TNFRSF18 TSC22D3 ITGA1 NGF RUNX3 NR4A2 DDIT3 IL1B BCL3 JMY ARHGEF3 TXNIP CDH13 TMBIM6 CD24 TLR2	0	0	UP in siEF	16020	membrane	1.0702e-10	694	1392	0.498	PATJ SERPINE2 TMEM200A TRIL SERPINE1 MRGPRF F11R GRPR EPS8 NYNRIN SCAMP5 GPR173 COMTD1 GPR176 ALCAM CREB3L1 CREB3L2 AP1S2 CYP1B1 HOMER3 CMKLR1 TMEM8B IER3 ANKS1B CUBN CXADR UNC13A UNC5B PRKCD FNDC3B UNC5C DKK1 SIGIRR CH25H BCAM CLDN4 ASPHD1 ORAI3 ORAI2 ASPHD2 RNF122 SKAP2 CFD NLRX1 MTMR3 FICD PDGFB PDGFA BCL10 SLC5A3 CHST11 RNF215 EPB41L1 RDH10 PDGFC MYO6 HMOX1 ST3GAL5 KCNMB4 CHST14 ABCA1 CADM4 F…	0	0	DN in EWS								0	0	DN in siEF	34641	cellular nitrogen compound metabolic process	2.6271e-14	184	873	0.21	DCLRE1B SLC23A2 DCLRE1A POP1 DSCC1 NUDT1 BCCIP RAX TTF2 ALKBH8 PNP PTTG1 EME1 EPC1 ENPP1 EARS2 TIPIN LIG1 DIMT1 DDX11 ATP11C CDKAL1 LIG3 ESCO2 KMO CDC25A ASRGL1 WDR77 ARC NEIL3 MTHFD1 DKC1 FANCD2 GPD2 GEMIN4 PADI2 GEMIN5 DNA2 BLM DNMT1 PRKDC PDE1B SLC1A3 PHB RPAP1 AK7 RAD51AP1 BRIP1 EMG1 TERT ORC1 FIGNL1 HLTF UTP20 CLSPN VARS1 FANCI CDT1 PRPF38A FANCM BCL11B XRCC2 EAF2 NFATC3 FANCA FANCC IGF1 PA2…	0	0	UP in siEF&EEF	8092	cytoskeletal protein binding	1.0884e-10	104	1778	0.058	WIPF2 AVIL FBXO25 TNC CFL2 COTL1 CAPN2 PLS3 NRCAM KIFAP3 TMSB10 MYLIP GABARAPL1 ACTN1 TPM2 TMOD2 TPM1 LMO7 ACTN4 MAPK8IP2 MAPK8IP3 ANK1 MAPK8IP1 CLIP2 DAAM1 DAAM2 TLN2 OBSL1 ARL8A STX1A PXK SDC4 SDC2 FLII SDC3 TWF2 CORO1A CNN3 CNN2 BCL2L11 EPB41L1 CALD1 MYO6 APOE RAB11FIP5 PRNP HOMER2 RAB27A DSTN PARVA PARVB CORO2A FHDC1 AIF1L FER GIPC1 JMY SDC1 CALM3 FXYD5 NF2 CALM2 SYNM B4GALT1 PKD2 TRIOBP SYNE…	0	0
UP in EWS	50789	regulation of biological process	7.9201e-06	214	437	0.489	ERRFI1 SERPINE2 MAML2 SERPINE1 BACH2 ICAM1 EPS8 KDR SOX8 CCN2 CCN1 CCNL1 IER3 EPHA4 CXADR MBNL2 ISLR2 DKK1 RUNX3 HOXB9 PPP1R3C DDIT3 RBP1 DDIT4 TXNIP SERPING1 TRIB3 TRIB1 ATF3 PTGES CDS1 BEX2 SDC4 EPAS1 EBI3 PDGFB PDGFA IL20RB BCL10 ZNF829 NUAK2 APH1B PDGFD HMOX1 A2M S100A10 JUN GADD45B GADD45A PBX3 LIF ELL2 FOSL2 COL1A1 CYP1A1 PKIG CD24 HRK NRP1 CSRNP1 BTG1 CAB39L CITED4 ADM VLDLR BBC3 HERPUD1 J…	0	0	UP in siEF	50794	regulation of cellular process	1.1197e-10	610	1392	0.438	ZNF296 SERPINE2 MAML2 AVIL SERPINE1 GRPR BACH2 EPS8 SCAMP5 GPR173 ALCAM CREB3L1 CREB3L2 TMEM8B IER3 MEF2C CXADR MBNL2 UNC5B PRKCD FNDC3B MED8 UNC5C BHLHA15 DKK1 DKK3 SIGIRR BCAM HOXB9 PRKAR1B DDIT3 DDIT4 RBP1 TXNIP SPARCL1 HOXB8 ATF3 OPTN SKAP2 ZBTB8A CRABP2 FICD CRABP1 PDGFB PDGFA BCL10 CHST11 PDGFC MYO6 S100A13 HMOX1 KCNMB4 GTF2IRD2B S100A11 S100A10 ABCA1 CDK18 JUN FZD2 JUP FZD5 PLK2 FZD7 ABCA4…	0	0	DN in EWS								0	0	DN in siEF	43226	organelle	6.1095e-14	573	873	0.656	RB1 IPO11 POP1 RAX TMEM97 SMC4 ALKBH8 SMC2 DCAF1 RAVER1 NDST4 RAVER2 MYB ANKFY1 AP1S3 GTSE1 EARS2 WDHD1 NUP210 FNBP1 DAPK1 PRKCB DDX11 RFX2 PASK ISL1 WDR77 SLC5A6 ARMC1 MTHFD1 PSME4 FDX1 ASF1B PIF1 ENPEP NUP205 CDCA2 SRCAP CDCA4 PRKDC CDCA5 CDCA7 NCAPG THY1 SKA3 NCAPH SKA2 CYB5R2 RRP7A TERT ALX4 NUP88 HMGXB3 PPARGC1B NR2C2AP NKX2-2 TOE1 PLK4 NGFR PRPF38A DNAH10 SNAPIN ABCA5 PLK1 NFATC3 NR0B1 PA2G…	0	0	UP in siEF&EEF	6928	cellular component movement	3.0775e-10	98	1778	0.055	PLAT PVR AMOT CXCL16 ALCAM CDH2 KIF5C PALM NRCAM IL6R ACVR1 MYLIP EPHA4 UNC5B TPM1 RFX3 ARID5B UNC5C PRKCA MAPK8IP3 ADAM17 TEP1 CERCAM ULK1 AJUBA VCL IGSF8 TWIST1 TXN EFNA5 CORO1A FUT8 SGPL1 EFNB3 CALD1 PODXL PLXNA3 TGFB2 JUP FN1 L1CAM DCLK1 NR4A2 COL5A1 GIPC1 ID1 JMY PLXNB1 CD24 ITGB1 ROBO2 NRP1 NRP2 BTG1 B4GALT1 CXCL8 SIX1 LAMC1 LYST LTB4R GLI2 SIX4 CAPZB NCK2 ITGA4 TNFRSF12A ITGA2 ITGA1 PLAUR …	0	0
UP in EWS	9605	response to external stimulus	7.9201e-06	36	437	0.082	HRK CXCL8 COL11A1 PDGFB PDGFA ADM VLDLR PTGS2 AMOT NUAK2 STC2 HSD17B2 RAC2 HMOX1 FYN CCN1 A2M JUN TGFB2 ANGPT2 VCAM1 DUSP1 CCL20 ITGA1 FOS NGF DCN COL1A1 NR4A2 DDIT3 IL1B BHLHE40 CYP1A1 TXNIP TLR3 TLR2	0	0	UP in siEF	50793	regulation of developmental process	1.1403e-10	120	1392	0.086	ERRFI1 OXTR CSF1 SERPINE2 SERPINE1 FGF1 ETS1 IL27RA AQP1 CDH2 PALM KDR SOX8 SOX9 IL6R LZTS1 CXADR IL4R WNT5B RSAD2 IGFBP3 LMO2 FNDC3B VASH2 ISLR2 VASH1 DKK1 PGF EREG COL4A2 ULK1 TRIB2 SCG2 ABCG1 RTN4R NOTCH3 DLX2 TSHZ3 FBLIM1 BRI3 LTBP4 PDGFA LPL DTX1 FOXO3 SOCS3 BCL2L11 HMOX1 NPHP3 APOE PLXNA3 ABCA1 JUN TGFB2 SMAD3 EIF2AK3 FN1 LIF SMAD7 EFNA1 BMP1 CDK6 MAFF PLXNB1 IL7R CD24 NRP1 BTG1 LDB1 TGFB1I…	0	0	DN in EWS								0	0	DN in siEF	5654	nucleoplasm	6.5991e-14	105	873	0.12	RB1 DSCC1 TTF2 CDC20 SOX2 CCND1 CHEK2 EPC1 OIP5 FBXO5 WDHD1 LIG1 UBE2E1 LIG3 POU3F1 POU3F2 CDC25A DKC1 FANCD2 PSME4 GEMIN4 GEMIN5 DNA2 KIF20B ANAPC1 KPNB1 KMT2D BLM PRKDC PHB PKMYT1 CCNB1 TERT ORC1 NACC1 ALX4 UTP20 CLSPN PPARGC1B TOE1 FANCI NGFR CDT1 FANCM ZBTB16 PLK1 EAF2 FANCB POLA1 CDK4 CALM1 EZH2 TOP2A AHCTF1 MCM7 WDR4 MCM10 BRCA1 HMGB1 BRCA2 XPO1 TRIM69 POLE RFC5 RFC3 RFC4 RFC2 CAD KIF23 DBF…	0	0	UP in siEF&EEF	31589	cell-substrate adhesion	3.2591e-10	36	1778	0.02	ITGB1 SNED1 LAMA5 COL13A1 ITGB5 ITGB4 LAMC1 NID1 PKD2 CORO1A NID2 PKD1 FBLN5 THBS3 SGCE BCL2L11 ITGAV PDK1 TMEM8B TNFRSF12A ITGA3 LAMB2 ITGA2 ACTN1 ITGA1 FN1 LAMB1 SORBS3 BCAM ADAM15 ITGA10 DLC1 ITGA7 ITGA6 AJUBA VCL	0	0
UP in EWS	10941	regulation of cell death	9.3878e-06	48	437	0.109	HRK CDS1 NRP1 FOXC2 BEX2 BTG1 SERPINE1 CEBPG TNFAIP3 BCL10 PTGS2 FOXO3 ETS1 THBS1 BBC3 TNFSF13B HERPUD1 NUAK2 APH1B CASP1 HMOX1 CCN2 MSX1 PRODH PHLDA1 IER3 BOK CARD10 JUN TGFB2 DUSP1 TNFRSF9 TNFRSF18 TSC22D3 ITGA1 NGF RUNX3 NR4A2 DDIT3 IL1B BCL3 JMY ARHGEF3 TXNIP CDH13 TMBIM6 CD24 TLR2	0	0	UP in siEF	48522	positive regulation of cellular process	1.2748e-10	242	1392	0.173	OXTR SERPINE2 MAML2 SERPINE1 ICAM1 AQP1 SCAMP5 EDNRA CREB3L2 KDR SOX8 CCN2 SOX9 SYNPO CCN1 SOX4 MEF2C FNDC3B EBF1 ISLR2 BHLHA15 MAPK8IP2 EREG CCDC80 HOXB9 DDIT3 TXNIP TRIB2 ATF3 SDC4 TSHZ3 EPAS1 EBI3 PDGFB PDGFA BCL10 SEC14L2 APH1B PDGFC MYO6 S100A13 HMOX1 APOE KCNN4 ABCA1 JUN JUP PLK2 FZD7 EIF2AK3 LIF RAB27A NFATC2 L1CAM FOSL2 BST2 FOSL1 TNFSF4 GIPC1 ID3 CD24 ITM2B HRK NRP1 COL18A1 PCSK1 BTG1 SL…	0	0	DN in EWS								0	0	DN in siEF	51276	chromosome organization	6.9365e-14	73	873	0.083	RB1 TOP2A SUV39H1 DSCC1 NCAPG2 HJURP BRCA2 SMC4 SMC2 SOX2 CHAF1B CHAF1A HMGN5 SOX1 PTTG1 EPC1 DPF3 ARID2 DLGAP5 PRMT6 HELLS SHPRH PRKCB DDX11 CAD UBE2E1 TEX15 BAZ1A HASPIN SMC1A RNF40 RBL1 ESPL1 DKC1 KIFC1 FANCD2 ASF1B MCM2 KMT2D BLM DNMT1 SRCAP PRKDC CDCA5 DOT1L NCAPG PHB MACROH2A2 CENPA NCAPH CCNB1 TERT HLTF NSD2 RAD54L SUZ12 EAF2 HUWE1 FANCB ZWINT CENPE CENPF RAD50 KIF18A CENPH NASP UBE2N NCAP…	0	0	UP in siEF&EEF	9987	cellular process	3.5968e-10	1074	1778	0.604	AVIL F11R SCAMP5 MLYCD TMEM8B MEF2C CXADR UNC5B RFX3 UNC5C HSPG2 MYL6 PRKAR1B ASPHD1 PRKAR1A DDIT3 DDIT4 RBP1 TXNIP ASPHD2 OPTN ATF3 SKAP2 EXD2 MTMR3 COL13A1 CRABP2 PDGFA PLA2G6 SLC5A3 DYNC2LI1 EPB41L1 PRKAR2B RDH10 RNF217 MYO6 KCNMB4 ABCA1 JUN CADM4 JUP FUCA1 FUCA2 FN1 EIF2AK3 PBX4 L1CAM GRIN2C LARP6 PBX1 GRIN2D COL1A1 ABTB1 PPFIBP1 AGO4 SFXN3 FAT3 DCHS1 FXYD5 HRK ACHE ARF4 SHB PIGV LITAF TRIOBP…	0	0
UP in EWS	65007	biological regulation	1.2056e-05	223	437	0.51	ERRFI1 SERPINE2 MAML2 SERPINE1 BACH2 ICAM1 EPS8 LIPH KDR SOX8 CCN2 CCN1 CCNL1 IER3 EPHA4 CXADR MBNL2 ISLR2 DKK1 RUNX3 HOXB9 PPP1R3C DDIT3 RBP1 DDIT4 TXNIP SERPING1 TRIB3 TRIB1 ATF3 PTGES CDS1 BEX2 SDC4 EPAS1 EBI3 PDGFB PDGFA IL20RB BCL10 ZNF829 NUAK2 APH1B PDGFD HMOX1 A2M S100A10 JUN GADD45B GADD45A PBX3 LIF ELL2 FOSL2 COL1A1 CYP1A1 PKIG CD24 HRK NRP1 CSRNP1 BTG1 CAB39L CITED4 ADM VLDLR BBC3 HERP…	0	0	UP in siEF	9887	organ morphogenesis	2.2521e-10	102	1392	0.073	ERRFI1 CSF1 TNC CELSR1 AQP1 TGM1 EDNRA CCN2 SOX9 CCN1 PHLDA2 TGM2 PDGFRB PDGFRA LMO4 TPM1 ARID5B GEM PGF EREG ROR2 HOXB8 SCG2 NOTCH3 DLX2 TSHZ3 TSHZ1 PDGFB PDGFA BCL10 SOCS3 SGPL1 SOCS1 BCL2L11 CHST11 PODXL RDH10 MYO6 WNT3 TGFB2 SMAD3 FZD6 LIF SMAD7 EFNA1 COL1A1 COL1A2 BMP1 COL5A1 COL5A2 SDC1 ALPL ID3 NRP1 COL18A1 PTPRU TGFB1I1 FHL1 PTPRO CTSZ SIX1 ADM TSPAN12 SOBP LFNG HEY1 NKX3-2 NKX3-1 ANXA3 G…	0	0	DN in EWS								0	0	DN in siEF	43229	intracellular organelle	6.9881e-14	572	873	0.655	RB1 IPO11 POP1 RAX TMEM97 SMC4 ALKBH8 SMC2 DCAF1 RAVER1 NDST4 RAVER2 MYB ANKFY1 AP1S3 GTSE1 EARS2 WDHD1 NUP210 FNBP1 DAPK1 PRKCB DDX11 RFX2 PASK ISL1 WDR77 ARMC1 MTHFD1 PSME4 FDX1 ASF1B PIF1 ENPEP NUP205 CDCA2 SRCAP CDCA4 PRKDC CDCA5 CDCA7 NCAPG THY1 SKA3 NCAPH SKA2 CYB5R2 RRP7A TERT ALX4 NUP88 HMGXB3 PPARGC1B NR2C2AP NKX2-2 TOE1 PLK4 NGFR PRPF38A DNAH10 SNAPIN ABCA5 PLK1 NFATC3 NR0B1 PA2G4 FLI1 …	0	0	UP in siEF&EEF	32879	regulation of localization	4.3723e-10	133	1778	0.074	OXTR CSF1 SERPINE2 TNC AMOT CXCL16 SCAMP5 EDNRA CNST CDH2 ADORA1 ARL6IP5 IL6R PDK1 CPT1A WNT5B IGFBP5 ACTN1 TPM1 F2R ADAM10 RFX3 UNC5C PRKCA ACTN4 VASH1 ADAM17 TEP1 BIN1 ROR2 AJUBA STX1A VCL ABCG1 EPHA2 RAB5B PXK STXBP1 PDGFA TXN ABHD5 PLD1 CORO1A RTN4 SLC9A3R1 PODXL MYO6 DPH3 HMOX1 KCNMB4 APOE PLXNA3 BBS2 ABCA1 WWTR1 TGFB2 SMAD3 JUP DMPK RBPMS WFS1 LIF SYT7 SMAD7 EHD1 EFNA1 CYLD GNAQ BCL3 CALM3 …	0	0
UP in EWS	9725	response to hormone stimulus	1.2056e-05	31	437	0.07	FOXC2 BTG1 SERPINE1 PDGFB PDGFA ADM VLDLR PTGS2 HDAC9 THBS1 SOCS1 HMOX1 CCN2 CCN1 A2M TAC1 PDGFRA TGFB2 ANXA3 DUSP1 FOS NGF COL1A1 VGF IL1B TXNIP MMP19 TRIB3 CD24 ABCG1 TLR2	0	0	UP in siEF	9611	response to wounding	6.6258e-10	90	1392	0.064	NRP1 PCSK1 CXCL8 GPR68 PROS1 FHL1 SERPINE1 TNC PLAT ADM F11R LTB4R EFEMP2 PLAU MDK NFKBIZ ADORA1 CCN2 IL6R CTSB IL11 PDGFRA IGFBP4 SPHK1 MST1 TPM1 MYOF PLA2G4C F2R PLAUR CYBA NGF F3 EREG SIGIRR VCAN GAL LOX RTN4RL1 NINJ1 SERPING1 PPARA AJUBA SCG2 CHST2 MGLL EPHA3 CD44 CFD NOTCH3 C1S C1R SDC2 PDGFB PDGFA TFPI THBS1 HRH1 IRAK2 ERBB2 SPP1 HMOX1 CCL2 CD59 APOE A2M TAC1 CD55 TGFB2 GSN SMAD3 LAMB2 FZD7…	0	0	DN in EWS								0	0	DN in siEF	33554	cellular response to stress	1.4135e-13	80	873	0.091	DCLRE1B TOP2A DCLRE1A FEN1 RIF1 MCM7 NUDT1 BCCIP BRCA1 HMGB1 BRCA2 ALKBH8 CHAF1B CHAF1A CCND1 PTTG1 EME1 EXO1 CHEK2 GTSE1 POLE MAP3K4 TP63 RFC5 PRMT6 SHPRH RFC3 TIPIN RFC4 SYK LIG1 RFC2 RAD23A LIG3 KIF22 ESCO2 SMC1A NEIL3 FANCD2 TFEC ATG4C TIMELESS DNA2 DTL MCM2 BLM PCNA HLF PRKDC FAAP24 TYMS POLD3 RAD51AP1 FGD4 BRIP1 SLX4 POLD1 RBBP8 RAD54L CLSPN MAP2K6 FANCI TRAP1 POLQ ATAD5 FANCM XRCC2 CAV1 PL…	0	0	UP in siEF&EEF	50793	regulation of developmental process	9.424e-10	140	1778	0.078	ERRFI1 OXTR CSF1 SERPINE2 CLU IL27RA AMOT ZFP36 CDH2 PALM NRCAM SOX8 SOX9 IL6R JUNB ACVR1 CXADR IL4R WNT5B SERPINF1 CTNNBIP1 FNDC3B VASH2 PRKCA VASH1 PGF COL4A2 TEP1 ULK1 TRIB2 ABCG1 EPHA2 RTN4R DLX1 NOTCH3 DLX2 NUMBL TSHZ3 FBLIM1 BRI3 LTBP4 PDGFA TWIST1 FOXO4 FOXO3 CORO1A RTN4 BCL2L11 ANKH HMOX1 NPHP3 APOE CD276 PLXNA3 TFAP2A ABCA1 WWTR1 JUN TGFB2 SMAD3 FN1 EIF2AK3 LIF PBX1 SMAD7 EFNA1 BMP1 CDK6…	0	0
UP in EWS	43065	positive regulation of apoptosis	1.2441e-05	31	437	0.07	HRK CDS1 NRP1 CEBPG BCL10 PTGS2 FOXO3 ETS1 THBS1 BBC3 APH1B CASP1 HMOX1 PRODH PHLDA1 BOK JUN TGFB2 DUSP1 TNFRSF9 ITGA1 NGF RUNX3 DDIT3 IL1B BCL3 JMY ARHGEF3 TXNIP CD24 TLR2	0	0	UP in siEF	5201	extracellular matrix structural constituent	7.1516e-10	28	1392	0.02	COL18A1 TUFT1 COL11A1 LAMA4 COL11A2 COL12A1 FBLN1 PRELP EFEMP2 LAMB2 FN1 BGN MFAP5 COL1A1 COL3A1 COL2A1 COL1A2 COL5A1 COL4A2 COL4A1 COL6A2 COL5A3 MGP COL5A2 COL9A3 COL9A2 MATN3 FBN1	0	0	DN in EWS								0	0	DN in siEF	43227	membrane-bounded organelle	2.6885e-13	523	873	0.599	RB1 IPO11 POP1 RAX TMEM97 SMC4 ALKBH8 SMC2 DCAF1 RAVER1 NDST4 RAVER2 MYB ANKFY1 AP1S3 EARS2 WDHD1 NUP210 FNBP1 PRKCB DDX11 RFX2 PASK ISL1 WDR77 SLC5A6 ARMC1 MTHFD1 PSME4 FDX1 ASF1B PIF1 NUP205 CDCA2 SRCAP CDCA4 PRKDC CDCA5 CDCA7 NCAPG THY1 NCAPH CYB5R2 RRP7A TERT ALX4 NUP88 HMGXB3 PPARGC1B NR2C2AP NKX2-2 TOE1 PLK4 NGFR PRPF38A DNAH10 SNAPIN ABCA5 PLK1 NFATC3 NR0B1 PA2G4 FLI1 AGO2 REL SFXN1 HOXD4 …	0	0	UP in siEF&EEF	61061	muscle structure development	1.9986e-09	64	1778	0.035	ACHE FHL1 TNC CBY1 SIX1 FGFRL1 SYNE1 SGCE CSRP2 SIX4 SGCB CAPN2 SPEG CCN1 SOX6 SNTA1 CTSB CDON ACVR1 CHRNB1 MEF2C CXADR IGFBP5 LMO4 GAA TPM1 F2R DYRK1B ARID5B TGFBR3 MYL6 RCN1 TEP1 BIN1 SCN8A ITGA7 MYH9 TAGLN2 OBSL1 HBEGF LAMA5 IGSF8 TAGLN FOXC1 SEMA3C TSHZ3 TWIST1 FOXO4 LMNA ERBB2 FLNB DMD MSX1 MEF2D SVIL TCF7L2 TGFB2 LIF MAPK12 VEGFA SMAD7 RCAN1 SDC1 AGRN	0	0
UP in EWS	32103	positive regulation of response to external stimulus	1.3438e-05	13	437	0.029	CXCL8 SERPINE1 PDGFB VEGFC PTGS2 THBS1 IL1B KDR F2RL1 CDH13 TAC1 TLR3 TLR2	0	0	UP in siEF	51239	regulation of multicellular organismal process	1.1694e-09	146	1392	0.104	ERRFI1 SLC27A1 OXTR CSF1 SERPINE2 SERPINE1 TNC PLAT FGF1 ETS1 IL27RA AQP1 SCAMP5 CDH2 PLAU ADORA1 SOX8 CCN2 SOX9 CCN1 IL6R LZTS1 MYLIP CXADR IL4R RSAD2 LMO4 IGFBP3 TPM1 LMO2 F2R VASH2 ISLR2 VASH1 DKK1 PGF EREG SIGIRR COL4A2 ULK1 TRIB2 MYL9 SCG2 RTN4R NOTCH3 DLX2 SLC22A5 SDC4 EPAS1 BRI3 EBI3 PDGFB PDGFA DTX1 BCL10 FOXO3 SLC5A3 CNN1 SGPL1 PCSK1N MYO6 HMOX1 KCNMB4 APOE TAC1 PLXNA3 JUN TGFB2 SMAD3 EI…	0	0	DN in EWS								0	0	DN in siEF	15630	microtubule cytoskeleton	2.8262e-13	76	873	0.087	RB1 RIF1 CCNF KIF14 DNHD1 BUB1B BRCA1 KIF11 BRCA2 KIF15 CDC20 TUBA1B KIF1C KNTC1 FBXO5 KIF1A GTSE1 DLGAP5 CEP55 LRRCC1 USP2 HAUS4 KIF24 KIF23 HAUS6 KIF22 RANGAP1 CKAP5 SGO1 ASPM RP1 ESPL1 KATNAL1 INCENP KIFC1 TCP1 MCM3 BIRC5 KIF2C KIF20B FKBP4 DTL SKA3 AURKB AURKA SKA2 CCNB1 CDC45 KLC2 RACGAP1 MFN2 FAM83D BUB1 DYNC1I1 CCT5 PLK4 DNAH10 SPAG5 CEP152 PLK1 FANCB FLI1 MZT1 CENPE TPX2 CENPF KIF18A KIF1…	0	0	UP in siEF&EEF	44420	extracellular matrix part	2.0865e-09	37	1778	0.02	ACHE COL18A1 LAMA5 SPARC COL13A1 LAMA4 COL11A2 TNC LAMC1 NID1 NID2 TIMP2 EMILIN3 DST ANXA2 LAMB2 LAMB1 HSPG2 VEGFA COL1A1 CCDC80 COL2A1 LOX COL5A1 COL4A2 COL4A1 COL7A1 MFAP2 COL6A1 COL5A2 VWA1 ITGA6 COL9A3 COL9A2 AGRN FREM2 FBN1	0	0
UP in EWS	48646	anatomical structure formation involved in morphogenesis	1.3439e-05	28	437	0.064	NRP1 FOXC2 FLT1 CXCL8 EPAS1 TNFAIP2 PDGFA ADM BCL10 THBS1 APOLD1 KDR CASP1 HMOX1 CCN2 CCN1 NKX3-1 JUN TGFB2 TNFRSF12A FZD6 VEGFC KLF4 COL1A1 KLF5 MMP19 COL8A1 CDH13	0	0	UP in siEF	6928	cellular component movement	1.8569e-09	81	1392	0.058	NRP1 SPON2 BTG1 CXCL8 SIX1 PLAT ETS1 LYST LTB4R ICAM1 CXCL16 ALCAM CDH2 KIF5C TUBB3 PALM NCK2 CCN2 IL6R PDGFRB MYLIP EPHA4 ITGA4 S100A2 TNFRSF12A UNC5B TPM1 SHROOM2 PLAUR ARID5B UNC5C TGFBR1 TGFBR3 MMP14 VCAN CEACAM1 CERCAM CDH13 ITGA6 ULK1 AJUBA SCG2 CD44 LAMA5 FOXC1 SEMA3C SEMA3A SEMA3B PDGFB SEMA3F EFNA5 PTGS2 THBS1 SGPL1 CALD1 PODXL ERBB2 SPOCK1 CCL2 FYN PLXNA3 CTHRC1 TGFB2 JUP LAMB2 FN1 VEGF…	0	0	DN in EWS								0	0	DN in siEF	6807	nitrogen compound metabolic process	2.8262e-13	188	873	0.215	DCLRE1B SLC23A2 DCLRE1A PGLYRP2 POP1 DSCC1 NUDT1 BCCIP RAX TTF2 ALKBH8 PNP PTTG1 EME1 EPC1 ENPP1 EARS2 TIPIN LIG1 DIMT1 DDX11 ATP11C CDKAL1 LIG3 ESCO2 KMO CDC25A ASRGL1 WDR77 ARC NEIL3 MTHFD1 DKC1 FANCD2 GPD2 GEMIN4 PADI2 GEMIN5 DNA2 BLM DNMT1 PRKDC PDE1B SLC1A3 PHB RPAP1 AK7 RAD51AP1 BRIP1 EMG1 TERT ORC1 FIGNL1 HLTF SLC19A3 UTP20 KDSR CLSPN VARS1 FANCI CDT1 PRPF38A FANCM BCL11B XRCC2 EAF2 NFATC3…	0	0	UP in siEF&EEF	6950	response to stress	2.2282e-09	262	1778	0.147	ERRFI1 OXTR AVIL ABAT F11R ENO3 IL27RA SCAMP5 EDNRA RPS6KA5 GJA3 CREB3L4 CREB3L1 DHX58 CREB3L2 CCN1 PDK1 ACVR1 HLA-B PRKCA ACTN4 MAPK8IP3 MAPK8IP1 SIGIRR DDIT3 DDIT4 NINJ1 TXNIP NEIL1 EPHA3 CFD NLRX1 EPAS1 SDC2 STXBP1 PDGFA BCL10 PRDX5 NUAK2 MYO6 SERPINH1 HMOX1 APOE JUN APOBEC3F GADD45B GADD45A FZD7 EDEM2 FN1 EIF2AK3 RAB27A GRIN2C NFATC4 MANF FOSL1 COL1A1 SDC1 ID3 HYOU1 CD24 HRK ACHE NRP1 COL18A1…	0	0
UP in EWS	43068	positive regulation of programmed cell death	1.3682e-05	31	437	0.07	HRK CDS1 NRP1 CEBPG BCL10 PTGS2 FOXO3 ETS1 THBS1 BBC3 APH1B CASP1 HMOX1 PRODH PHLDA1 BOK JUN TGFB2 DUSP1 TNFRSF9 ITGA1 NGF RUNX3 DDIT3 IL1B BCL3 JMY ARHGEF3 TXNIP CD24 TLR2	0	0	UP in siEF	35466	regulation of signaling pathway	3.3919e-09	138	1392	0.099	ERRFI1 CSF1 GOLT1B CD81 CBLB RGS4 RGS3 CDH2 LEPR MAP3K6 IL6R RGS9 SOX4 TGM2 CARD10 WNT5B IGFBP5 TMOD2 PRKCD IGFBP2 F2R MAPK8IP2 MID1 DKK1 MAPK8IP1 EREG DKK3 SIGIRR S100A4 ULK1 TRIB2 SCG2 FICD PDGFB HTRA1 LTBP4 DTX1 BCL10 FOXO1 SOCS3 SOCS1 ATXN1 CHST11 IRAK2 S100A13 HMOX1 APOE TBC1D17 RALGDS TGFB2 SMAD3 JUP RBPMS IQSEC2 HSPA5 NEK6 PLK2 LIF L1CAM ADAP1 SMAD7 BST2 EFNA1 CYLD GIPC1 CD24 MAP3K14 FLT1 …	0	0	DN in EWS								0	0	DN in siEF	43231	intracellular membrane-bounded organelle	3.6636e-13	522	873	0.597	RB1 IPO11 POP1 RAX TMEM97 SMC4 ALKBH8 SMC2 DCAF1 RAVER1 NDST4 RAVER2 MYB ANKFY1 AP1S3 EARS2 WDHD1 NUP210 FNBP1 PRKCB DDX11 RFX2 PASK ISL1 WDR77 ARMC1 MTHFD1 PSME4 FDX1 ASF1B PIF1 NUP205 CDCA2 SRCAP CDCA4 PRKDC CDCA5 CDCA7 NCAPG THY1 NCAPH CYB5R2 RRP7A TERT ALX4 NUP88 HMGXB3 PPARGC1B NR2C2AP NKX2-2 TOE1 PLK4 NGFR PRPF38A DNAH10 SNAPIN ABCA5 PLK1 NFATC3 NR0B1 PA2G4 FLI1 AGO2 REL SFXN1 HOXD4 SFXN2 H…	0	0	UP in siEF&EEF	12505	endomembrane system	4.8568e-09	219	1778	0.123	ANTXR2 SCAMP5 GOLGA2 EDNRA CREB3L4 CREB3L1 BSG CREB3L2 AP1S2 ARL6IP5 CYP1B1 IL15RA ACSL1 ENTPD6 PAQR3 ENTPD7 HLA-A MAPK8IP3 CYP2U1 ASPHD1 PARD3 ASPHD2 TAGLN2 KDELR2 ULK1 KDELR3 STX1A CFD SLC35D1 FUT11 UBE2J1 UGCG SYNGR1 SGPL1 CHST11 RDH10 PDGFC MYO6 ST3GAL4 ST3GAL5 ST3GAL6 CHST14 ST3GAL1 SEC31B B4GALNT4 VAT1 FZD5 SLC33A1 EIF2AK3 RAB27A EXT2 RNF103 GIPC1 ITM2B CLIC4 TRAM1 SH3KBP1 DENND1A VLDLR PCS…	0	0
UP in EWS	48523	negative regulation of cellular process	1.9282e-05	80	437	0.183	HRK ERRFI1 NRP1 BTG1 CXCL8 SERPINE2 SERPINE1 TNFAIP3 ADM ETS1 TNFSF13B RGS4 SESN2 TIMP2 SOX8 IER3 NKX3-1 KLF10 CXADR TNFRSF18 TSC22D3 PDCD1LG2 NGF DKK1 RUNX3 MID1 ASPN GEM RHOB GREM1 DDIT3 IL1B RBP1 DDIT4 TXNIP CDH13 TMBIM6 TRIB3 TRIB1 TLR3 ABCG1 HBEGF PTGES PPP1R15A CD274 FOXC2 RGS16 PDGFB GLIS3 PDGFA IL20RB BCL10 PTGS2 FOXO3 HDAC9 THBS1 SOCS1 NUAK2 GPNMB FRZB HMOX1 MSX1 DRD4 JUN TGFB2 ANGPT2 MP…	0	0	UP in siEF	31589	cell-substrate adhesion	5.2841e-09	30	1392	0.021	SNED1 LAMA5 ITGB5 ITGB4 NID1 NID2 FBLN5 THBS3 SGCE BCL2L11 ITGB8 ITGAV CCN2 TMEM8B TNFRSF12A ITGA3 LAMB2 ACTN1 FN1 SORBS3 COL3A1 BCAM ADAM15 COL5A3 ITGA10 ITGA11 ITGBL1 ITGA6 AJUBA CD44	0	0	DN in EWS								0	0	DN in siEF	6261	DNA-dependent DNA replication	1.7274e-12	22	873	0.025	BLM RFC3 TIPIN FEN1 PCNA RFC4 MCM7 PRIM1 FANCB BRCA2 POLD3 POLA1 CDC45 ORC1 POLE2 MCM3 MCM4 MCM5 MCM6 DNA2 DTL MCM2	0	0	UP in siEF&EEF	22008	neurogenesis	7.1785e-09	117	1778	0.065	SERPINE2 RORA CLU CELSR3 ALCAM CDH2 KIF5C NRCAM SOX8 SOX9 SOX6 EPHA4 WNT5B UNC5B SERPINF1 DAPK3 UNC5C PRKCA MAPK8IP3 TEP1 PARD3 ULK2 ROR1 ULK1 ROR2 EPHA2 RTN4R DLX1 NOTCH3 DLX2 NUMBL RTN1 BRI3 SDC2 STXBP1 TWIST1 EFNA5 RTN4 EFNB3 MYO6 PSAP TSPAN2 APOE WNT3 PLXNA3 TGFB2 EIF2B2 FZD2 FZD5 FZD7 LIF FZD8 L1CAM PBX1 DCLK1 EFNA1 NR4A2 CDK6 GNAQ PLXNB2 ID3 PLXNB1 NF2 FGFR1 CDKN1C ROBO2 NRP1 NRP2 LDB1 SIX1…	0	0
UP in EWS	7165	signal transduction	1.9575e-05	81	437	0.185	NRP1 FLT1 CXCL8 PIK3CD ADM VLDLR RND3 TNFSF13B EPS8 RGS4 ARHGAP42 ANKRD1 RAC2 PDE4B CASP1 CCN1 RALGPS2 DUSP4 EPHA4 CARD10 GUCY1A2 DUSP2 TNFRSF18 PDE4D ITGA1 FOS DUSP8 NGF GEM RHOB RAB32 GPRC5A RAB31 IL1B ARHGEF3 RAPGEF2 CDH13 TRIB1 MET TLR3 HBEGF PTGES TLR2 CDS1 OPRD1 PTGER4 CD274 RASL12 RTN1 CALCB EPAS1 ITPR1 LY96 NEDD9 NTS THBS1 GNAI1 SDCBP SOCS1 IRAK2 HMOX1 ABL2 FYN S1PR2 DRD4 S100A10 JUN ANGP…	0	0	UP in siEF	42127	regulation of cell proliferation	5.7802e-09	121	1392	0.086	IFITM1 SPARC CSF1 CD81 SERPINE1 CBLB GRPR FGF1 ETS1 AQP1 EDNRA PLAU ADORA1 KDR SOX8 CCN2 SOX9 CCN1 IL6R SOX4 TNS2 TGM2 IL13RA1 PDGFRB PDGFRA CXADR IGFBP5 IGFBP3 F2R VASH2 P3H1 VASH1 PGF EREG S100A6 TXNIP KCTD11 ROR2 SCG2 ATF3 SKAP2 PTGES CD274 EBI3 PDGFB PDGFA FOXO1 CHST11 PDGFC HMOX1 TNFRSF14 IGFBP7 APOE IGFBP6 TAC1 S100A11 JUN TGFB2 SMAD3 FZD7 LIF FOSL2 FOSL1 CDK6 TNFSF4 CD24 MXD4 NRP1 COL18A1 …	0	0	DN in EWS								0	0	DN in siEF	5488	binding	4.6147e-12	702	873	0.804	RB1 IPO11 PGLYRP2 POP1 RAX TMEM97 ENO2 CLDN1 ABCA13 SMC4 ALKBH8 SMC2 DCAF1 PREX1 LIPE RAVER1 PSMD3 RAVER2 MYB C3AR1 ANKFY1 RTTN AP1S3 EARS2 WDHD1 UNC5A NUP210 FNBP1 DAPK1 PRKCB DDX11 RFX2 SYTL5 PASK ISL1 PHKA2 WDR77 ARMC1 MTHFD1 PSME4 FDX1 PADI2 PRKD1 FREM2 ASF1B PIF1 ENPEP NUP205 TTYH2 SRCAP PRKDC CDCA5 NCAPG THY1 SKA3 SKA2 RRP7A C5 HSPH1 TERT FIGNL1 SLC19A3 ALX4 HMGXB3 PPARGC1B NKX2-2 TOE1 NAA5…	0	0	UP in siEF&EEF	44421	extracellular region part	7.8998e-09	162	1778	0.091	SPARC CSF1 SERPINE2 TNC PLAT CLU PVR LOXL1 LOXL2 CXCL16 LGALS3 LEPR IL6R IL15RA WNT5B IGFBP5 IGFBP4 SERPINF1 ENTPD6 IGFBP2 P3H1 PCOLCE VASH1 NPNT HSPG2 PGF BTD CCDC80 LOX COL4A2 COL4A1 FREM2 CFD COL13A1 HTRA1 LTBP4 PDGFA FBLN1 LTBP3 EFNA5 NID1 NID2 LTBP1 ADAMTS10 FBLN5 ADAMTS15 PCSK1N PDGFC PSAP S100A13 HMOX1 APOE WNT3 TGFB2 TFPI2 FN1 LIF ISG15 IGF2R COL1A1 BMP1 COL5A1 COL5A2 ALPL COL9A3 COL9A2 U…	0	0
UP in EWS	43536	positive regulation of blood vessel endothelial cell migration	1.9764e-05	6	437	0.013	PDGFB VEGFC PTGS2 HDAC9 THBS1 AMOT	0	0	UP in siEF	31226	intrinsic to plasma membrane	6.053e-09	157	1392	0.112	OXTR CD82 GPR68 CD81 CELSR1 GRPR ICAM1 IL27RA AQP1 EPS8 GPR176 EDNRA PALM ADORA1 KDR LEPR IL6R SLC16A3 SLC16A4 CMKLR1 IL13RA1 SLC16A5 PDGFRB CHRNB1 EPHA4 PDGFRA CXADR IL4R IL11RA F2R HLA-B HLA-C CNPY2 CYBA HLA-A ATP1B1 TM4SF1 EREG BCAM CLDN4 SCN8A KCTD11 ROR2 KCTD15 EPHA3 ABCG1 SLC22A4 NOTCH3 PTGFR SDC4 SDC2 EFNA5 SLC5A3 HRH1 SYNGR2 TSPAN9 PODXL TSPAN4 ST3GAL5 KCNMB4 TNFRSF14 KCNN4 NTSR1 ABCA1 FZ…	0	0	DN in EWS								0	0	DN in siEF	7017	microtubule-based process	8.0985e-12	44	873	0.05	KIF14 DNHD1 BUB1B KIF11 BRCA2 CENPA KIF15 AURKA TUBA1B KLC2 RCC1 KIF1C FBXO5 KIF1A GTSE1 DYNC1I1 DNAH10 SPAG5 HAUS4 KIF24 KIF23 HAUS6 KIF22 FANCB KNL1 SMC1A CKAP5 ZWINT SGO1 CENPE KIF18A KIF18B ESPL1 HOOK1 KIFC1 CENPJ KIF4A SASS6 TACC3 TUBGCP3 KIF2C TUBGCP4 KIF20B SPC25	0	0	UP in siEF&EEF	22603	regulation of anatomical structure morphogenesis	1.0277e-08	68	1778	0.038	ROBO2 NRP1 BTG1 B4GALT1 CSF1 TGFB1I1 SIX1 TSPAN12 AMOT CDH2 PALM NEFL NEFM NRCAM APC2 TNFRSF12A METRN ANXA3 SPHK1 SERPINF1 VASH2 SHROOM3 VASH1 F3 PGF RHOB COL4A2 ADORA2B CDC42EP4 CDC42EP3 ITGA7 MYH9 CDC42EP1 ULK1 RHOQ GAS7 EPHA2 RTN4R NUMBL FBLIM1 SEMA3A PDGFA FOXO4 SEMA3F PTGS2 CORO1A RTN4 CST3 PDPN ERBB2 HMOX1 FYN APOE PLXNA3 TFAP2A WWTR1 TGFB2 SMAD3 FN1 VEGFA SMAD7 EFNA1 DLC1 ID1 PLXNB2 PLXNB1…	0	0
UP in EWS	50920	regulation of chemotaxis	2.3231e-05	10	437	0.022	GREM1 ANGPT2 CXCL8 SERPINE1 PDGFB KDR VEGFC F2RL1 CDH13 THBS1	0	0	UP in siEF	10033	response to organic substance	6.053e-09	123	1392	0.088	SLC27A1 OXTR SERPINE1 PLOD3 PLAT AQP1 CXCL16 EPS8 EDNRA CREB3L1 CREB3L2 LEPR CYP1B1 FBXO6 CCN2 CCN1 IL6R RGS9 CHRNB1 PDGFRA IGFBP2 F2R VASH1 PGF EREG LOX PRKAR1B DDIT3 TXNIP EPHA3 ABCG1 SDC2 PDGFB PDGFA PIK3R3 AK4 BCL10 PLD1 FOXO1 SOCS3 SOCS1 IRAK2 HMOX1 IGFBP7 APOE A2M TAC1 JUN TGFB2 SMAD3 JUP HSPA5 EDEM2 EPHX1 EIF2AK3 MAFA FOSL1 COL1A1 NR4A2 PDE3A SDC1 ALPL ID3 CD24 PCSK1 PTPRU BTG1 PTPRO FHL2 …	0	0	DN in EWS								0	0	DN in siEF	44260	cellular macromolecule metabolic process	8.3273e-12	261	873	0.298	POP1 CCNF NUDT1 RAX ALKBH8 CDC20 LIPE CHEK2 PSMD3 EPC1 EARS2 EPHA5 EPHA7 ST6GAL1 TIPIN ALG6 DAPK1 PRKCB ESCO2 HASPIN PASK PHKA2 WDR77 UHMK1 ARC NEIL3 PADI2 PRKD1 DNA2 TTLL12 PRKDC ARX RPAP1 KALRN C5 BRIP1 TERT HLTF ST8SIA5 NAA50 PLK4 NGFR TRAP1 CDT1 PRPF38A BCL11B SIAH3 XRCC2 PLK1 EAF2 NFATC3 IGF1 PA2G4 GDF6 CCT6A POLA1 PPP1R1A AGO2 DUS1L TP73 RET TOP2A HBS1L FEN1 SUV39H1 BRCA1 BRCA2 TRIM9 CHAF1B…	0	0	UP in siEF&EEF	5604	basement membrane	1.2667e-08	28	1778	0.015	ACHE COL18A1 LAMA5 SPARC LAMA4 TNC LAMC1 NID1 NID2 TIMP2 EMILIN3 DST ANXA2 LAMB2 LAMB1 HSPG2 VEGFA CCDC80 COL2A1 COL5A1 COL4A2 COL4A1 COL7A1 VWA1 ITGA6 AGRN FREM2 FBN1	0	0
UP in EWS	8284	positive regulation of cell proliferation	2.4744e-05	31	437	0.07	NRP1 FLT1 EBI3 PDGFB PDGFA ADM PTGS2 TNFSF13B KDR RAC2 HMOX1 SOX8 CCN2 S1PR2 CCN1 TAC1 IL13RA1 PDGFRA JUN TGFB2 VCAM1 LIF VEGFC PDCD1LG2 NGF FOSL2 KLF5 IL1B CDH13 CD24 ATF3	0	0	UP in siEF	5604	basement membrane	7.4612e-09	25	1392	0.017	COL18A1 LAMA5 SPARC LAMA4 TNC NTN4 NID1 NID2 EFEMP2 TIMP2 EMILIN3 ANXA2 LAMB2 HSPG2 SMOC2 CCDC80 COL2A1 COL5A1 COL4A2 COL4A1 COL7A1 VWA1 COL8A1 ITGA6 FBN1	0	0	DN in EWS								0	0	DN in siEF	51726	regulation of cell cycle	9.8608e-12	62	873	0.071	RB1 CCNF BCCIP BUB1B BRCA1 FOXM1 BRCA2 SOX2 CCND3 CCND1 CHEK2 RCC1 KNTC1 FBXO5 GTSE1 DLGAP5 TIPIN GAS2L3 BORA USP2 KNL1 SMC1A CDC25A UHMK1 ESPL1 TIMELESS BIRC5 KIF20B DTL BLM PKMYT1 BRIP1 CCNB1 CDC45 E2F1 RBBP8 E2F2 CLSPN BUB1 MAP2K6 PLK4 NGFR CDT1 GABBR1 EGF PLK1 IGF1 PA2G4 FANCB FANCG ZWINT TICRR CENPE ANLN TPX2 CENPF CDK4 ID2 TACC3 CDKN3 TP73 MAD2L1	0	0	UP in siEF&EEF	5912	adherens junction	1.3587e-08	40	1778	0.022	SYNM OXTR TES ITGB5 SDC4 FBLIM1 SH3KBP1 TGFB1I1 FHL2 NEXN LPP TGM1 LASP1 CDH2 NPHP1 PDLIM7 TNS2 CXADR JUP ITGA2 ACTN1 SHROOM3 PARVA LMO7 PARVB WTIP AIF1L ARHGAP31 ADAM15 PARD3 DLC1 ZYX SDC1 MYH9 ITGA6 TLN2 NF2 AJUBA BCAR1 VCL	0	0
UP in EWS	9611	response to wounding	3.5292e-05	34	437	0.077	NRP1 CXCL8 SERPINE1 FHL1 PDGFB PDGFA IL20RB LY96 ADM F11R HDAC9 THBS1 IRAK2 NFKBIZ HMOX1 CCN2 A2M TAC1 CD55 PDGFRA TGFB2 VCAM1 PLLP CCL20 PLA2G4C FOS NGF DCN IL1B CYP1A1 SERPING1 PTX3 INA F2RL2	0	0	UP in siEF	22603	regulation of anatomical structure morphogenesis	1.1528e-08	58	1392	0.041	NRP1 BTG1 CSF1 TGFB1I1 SERPINE1 SIX1 TSPAN12 FGF1 AQP1 CDH2 PALM KDR LZTS1 APC2 TNFRSF12A METRN ANXA3 SPHK1 VASH2 ISLR2 VASH1 NGF F3 PGF ASPN RHOB GREM1 COL4A2 ADORA2B CDC42EP3 ANGPTL2 CDC42EP1 ULK1 RHOQ GAS7 RTN4R FBLIM1 SEMA3A NTN4 PDGFA SEMA3F PTGS2 THBS1 CST3 ERBB2 SPP1 HMOX1 CCL2 FYN APOE PLXNA3 TGFB2 SMAD3 FN1 SMAD7 EFNA1 PLXNB1 SPRY1	0	0	DN in EWS								0	0	DN in siEF	70	mitotic sister chromatid segregation	1.3757e-11	17	873	0.019	CDCA5 DDX11 DSCC1 NCAPG SMC1A SMC4 NCAPH ZWINT SMC2 CENPE CCNB1 KIF18A ESPL1 KIFC1 NCAPD2 NCAPD3 DLGAP5	0	0	UP in siEF&EEF	10033	response to organic substance	3.2486e-08	145	1778	0.081	SLC27A1 OXTR PLOD3 PLAT ABAT NR3C1 COMT CLU CXCL16 EPS8 EDNRA CREB3L4 CREB3L1 BSG CREB3L2 LEPR CYP1B1 CCN1 IL6R RGS9 JUNB PDK1 CHRNB1 CPT1A ATP6V0E1 SERPINF1 IGFBP2 F2R ADAM10 PRKCA VASH1 PGF ERN1 ADAM17 LOX PRKAR1B PRKAR1A TEP1 DDIT3 TXNIP ND3 EPHA3 ABCG1 SDC2 PDGFA PIK3R3 AK4 BCL10 FOXO4 PLD1 CORO1A FOXO1 HSP90B1 IRAK2 PRKAR2B SERPINH1 HMOX1 PMAIP1 APOE JUN TGFB2 EIF2B2 SMAD3 JUP HSPA5 EDEM2 EP…	0	0
UP in EWS	43535	regulation of blood vessel endothelial cell migration	3.7033e-05	7	437	0.016	ANGPT2 PDGFB VEGFC PTGS2 HDAC9 THBS1 AMOT	0	0	UP in siEF	48545	response to steroid hormone stimulus	1.4685e-08	48	1392	0.034	PCSK1 PTPRU OXTR PTPRO SERPINE1 PDGFB PDGFA LCAT PLAT ADM PTGS2 THBS1 AQP1 SOCS3 SOCS1 ERBB2 SPP1 LEPR HMOX1 CCL2 IGFBP7 CCN2 CCN1 A2M IL6R RGS9 PDGFRA TGFB2 ANXA3 GPX3 SPHK1 IGFBP2 NGF F3 MAPK15 ASS1 TGFBR1 FOSL1 COL1A1 MMP14 GAL LOX TXNIP SDC1 ALPL MFGE8 CD24 CRYAB	0	0	DN in EWS								0	0	DN in siEF	819	sister chromatid segregation	2.3913e-11	17	873	0.019	CDCA5 DDX11 DSCC1 NCAPG SMC1A SMC4 NCAPH ZWINT SMC2 CENPE CCNB1 KIF18A ESPL1 KIFC1 NCAPD2 NCAPD3 DLGAP5	0	0	UP in siEF&EEF	16265	death	3.8363e-08	123	1778	0.069	TRIO TRAF3IP2 CIB1 AHR CLU KIF5A PHLDA2 MAP3K5 IER3 PHLDA3 SH3GLB1 MEF2C UNC5B DAPK3 F2R SHISA5 UNC5C TIAM2 ERN1 RRAGC DDIT4 SPIN2B SQSTM1 OPTN EPHA2 BEX3 ITPR1 TWIST1 BCL10 PLA2G6 FOXO3 RTN4 SGPL1 ATXN1 BCL2L11 APH1B PSAP HMOX1 PMAIP1 BMF FIS1 JUN TGFB2 SMAD3 GADD45B GADD45A NEK6 SLC33A1 EIF2AK3 L1CAM FOSL2 TNFRSF10D GULP1 REEP1 NR4A2 ID1 TPP1 ITM2B BCL2L1 SH3KBP1 RASGRF2 TRADD HSPB8 ECE1 SHB LI…	0	0
UP in EWS	35556	intracellular signal transduction	3.7033e-05	45	437	0.102	OPRD1 PTGER4 RASL12 FLT1 CXCL8 LY96 PIK3CD ADM RND3 THBS1 GNAI1 RGS4 SDCBP SOCS1 IRAK2 RAC2 HMOX1 FYN S1PR2 CCN1 DRD4 RALGPS2 DUSP4 CARD10 DUSP2 GADD45B ITGA1 ARHGAP29 DUSP8 NGF GEM RHOB RAB32 MAPK10 RCAN1 RAB31 IL1B BCL3 ARHGEF3 RAPGEF2 CDH13 TRIB1 TLR3 TLR2 NEK11	0	0	UP in siEF	45785	positive regulation of cell adhesion	1.6289e-08	24	1392	0.017	CD63 COL26A1 TGFB2 SMAD3 SDC4 CSF1 TPM1 L1CAM FGF1 NID1 THBS1 FSTL3 SMAD7 CYTH3 CCDC80 CDK6 PODXL ERBB2 SPP1 KDR CDH13 ITGA6 CCN1 TGM2	0	0	DN in EWS								0	0	DN in siEF	32991	macromolecular complex	3.5048e-11	239	873	0.273	RB1 POP1 CCNF DNHD1 ENO2 SMC4 SMC2 CDC20 SOX2 PSMD3 EPC1 DPF3 AP1S3 GTSE1 TP63 NUP210 ACTN2 KNL1 PHKA2 UHMK1 KATNAL1 PSME4 KCTD12 KIF20B NUP205 TTYH2 SRCAP EPB41 PRKDC NCAPG PIK3R1 SKA3 NCAPH SKA2 CD79A C5 BRIP1 RACGAP1 TERT KCNN1 ALX4 NUP88 PPARGC1B PRPF38A DNAH10 PLK1 EXOC6B EAF2 NR0B1 IGF1 PA2G4 ZWINT GPN3 CCT6A POLA1 TPX2 AGO2 STRN CALM1 EZH2 TOP2A RYR2 SUV39H1 KIF14 BRCA1 KIF11 BRCA2 JPH1 MY…	0	0	UP in siEF&EEF	8219	cell death	4.7651e-08	122	1778	0.068	TRIO TRAF3IP2 CIB1 AHR CLU KIF5A PHLDA2 MAP3K5 IER3 PHLDA3 SH3GLB1 MEF2C UNC5B DAPK3 F2R SHISA5 UNC5C TIAM2 ERN1 RRAGC DDIT4 SPIN2B SQSTM1 OPTN EPHA2 BEX3 ITPR1 TWIST1 BCL10 PLA2G6 FOXO3 RTN4 SGPL1 ATXN1 BCL2L11 APH1B PSAP HMOX1 PMAIP1 BMF FIS1 JUN TGFB2 SMAD3 GADD45B GADD45A NEK6 SLC33A1 EIF2AK3 L1CAM FOSL2 TNFRSF10D GULP1 REEP1 ID1 TPP1 ITM2B BCL2L1 SH3KBP1 RASGRF2 TRADD HSPB8 ECE1 SHB LITAF BB…	0	0
UP in EWS	10594	regulation of endothelial cell migration	3.7295e-05	9	437	0.02	ANGPT2 ANXA3 PDGFB KDR VEGFC PTGS2 HDAC9 THBS1 AMOT	0	0	UP in siEF	32879	regulation of localization	2.4453e-08	106	1392	0.076	OXTR CSF1 SERPINE2 SERPINE1 TNC ETS1 ICAM1 AQP1 CXCL16 SCAMP5 EDNRA CDH2 PLAU ADORA1 KDR IL6R PDGFRB PDGFRA WNT5B IGFBP5 ACTN1 IGFBP3 TPM1 F2R UNC5C VASH1 ROR2 AJUBA ABCG1 PDGFB PDGFA LPL PLD1 PODXL MYO6 HMOX1 KCNMB4 APOE KCNN4 TAC1 PLXNA3 ABCA1 TGFB2 SMAD3 JUP RBPMS WFS1 LIF SYT7 SMAD7 EHD1 EFNA1 CYLD TNFSF4 BCL3 NRP1 COL18A1 PCSK1 PTPRU FLT1 PTPRO STON1 STON2 JPH2 TSPO ITGAV IL11 ANXA2 ANXA3 SP…	0	0	DN in EWS								0	0	DN in siEF	17076	purine nucleotide binding	4.532e-11	164	873	0.187	DGKG ERCC6L BUB1B TTF2 MKI67 ABCA13 SMC4 SMC2 DOCK10 CHEK2 SACS ENPP1 MAP3K4 EARS2 EPHA5 EPHA7 LIG1 DAPK1 PRKCB DDX11 MYH15 UBE2E1 ATP11C VRK1 LIG3 HASPIN KMO PASK UHMK1 MELK MTHFD1 KATNAL1 PRKD1 DNA2 KIF20B FKBP4 DGKK STEAP1 STEAP2 IPPK PIF1 BLM SRCAP PRKDC ARX PKMYT1 KALRN AK7 RHOBTB2 BRIP1 HSPH1 NDOR1 DHX33 GRK5 ORC1 FIGNL1 HLTF DHX37 NLRP2 MDN1 VARS1 MAP2K6 PLK4 HSPA9 TRAP1 HSPA8 DNAH10 ABCA5…	0	0	UP in siEF&EEF	51239	regulation of multicellular organismal process	5.8492e-08	169	1778	0.095	ERRFI1 SLC27A1 OXTR CSF1 SERPINE2 TNC PLAT IL27RA AMOT SCAMP5 ZFP36 CDH2 ADORA1 NRCAM SOX8 SOX9 CCN1 IL6R ZNF287 ACVR1 MYLIP CXADR IL4R LMO4 SERPINF1 CTNNBIP1 TPM1 F2R VASH2 PRKCA VASH1 PGF SIGIRR MYL5 ADAM17 COL4A2 TEP1 ULK1 TRIB2 STX1A EPHA2 RTN4R DLX1 NOTCH3 DLX2 NUMBL PXK SLC22A5 SDC4 EPAS1 BRI3 STXBP1 PDGFA TWIST1 BCL10 FOXO4 FOXO3 SLC5A3 RTN4 SYNGR1 SGPL1 PCSK1N ANKH MYO6 HMOX1 KCNMB4 APOE …	0	0
UP in EWS	2684	positive regulation of immune system process	3.9878e-05	22	437	0.05	TGFB2 VCAM1 SERPINE1 FHL1 EBI3 VEGFC BCL10 PDCD1LG2 THBS1 TNFSF13B ICAM1 IRAK2 IL1B SERPING1 F2RL1 FYN CD24 TAC1 TLR3 CD55 IL13RA1 TLR2	0	0	UP in siEF	10646	regulation of cell communication	2.4453e-08	150	1392	0.107	ERRFI1 OXTR CSF1 GOLT1B CD81 SERPINE1 PLAT CBLB RGS4 RGS3 CDH2 PLAU ADORA1 LEPR MAP3K6 CCN1 IL6R RGS9 LZTS1 SOX4 TGM2 CARD10 WNT5B IGFBP5 IGFBP3 TMOD2 PRKCD F2R MAPK8IP2 MID1 DKK1 MAPK8IP1 EREG DKK3 SIGIRR DDIT4 S100A4 TRIB2 SCG2 FICD PDGFB HTRA1 BCL10 FOXO1 SOCS3 SOCS1 ATXN1 CHST11 IRAK2 MYO6 PSAP S100A13 HMOX1 KCNMB4 APOE TBC1D17 TAC1 RALGDS TGFB2 SMAD3 JUP RBPMS IQSEC2 HSPA5 NEK6 PLK2 EIF2AK3 …	0	0	DN in EWS								0	0	DN in siEF	228	nuclear chromosome	8.5797e-11	34	873	0.038	PIF1 BLM PCNA MCM7 SUV39H1 PRIM1 MACROH2A2 CENPA AURKB SMC2 NOL6 POLD3 PURB CCNB1 SLX4 TERT RCC1 RAD54L BUB1 SUZ12 TIPIN PLK1 BAZ1A SMC1A SGO1 POLA1 RAD50 INCENP TCP1 MCM3 TIMELESS BIRC5 NCAPD3 MCM2	0	0	UP in siEF&EEF	16477	cell migration	7.2483e-08	63	1778	0.035	ITGB1 NRP1 NRP2 BTG1 B4GALT1 CXCL8 SIX1 PLAT LAMC1 LYST PVR AMOT CXCL16 SIX4 CDH2 NCK2 NRCAM IL6R ACVR1 ITGA4 TNFRSF12A ITGA1 ARID5B NAV1 PRKCA TGFBR1 TGFBR3 MMP14 ADAM17 VCAN TEP1 MYH9 ITGA6 ULK1 ITGA5 AJUBA LAMA5 FOXC1 SEMA3C SATB2 TWIST1 SEMA3F CORO1A FUT8 SGPL1 PODXL FYN TGFB2 JUP LAMB2 FN1 VEGFC DCLK1 VEGFA NR4A2 KITLG COL5A1 GIPC1 ID1 PLXNB1 CD24 MDGA1 BCAR1	0	0
UP in EWS	45766	positive regulation of angiogenesis	4.4793e-05	9	437	0.02	BTG1 ANGPT2 ANXA3 IL1B SERPINE1 PTGS2 HDAC9 THBS1 RHOB	0	0	UP in siEF	5887	integral to plasma membrane	3.2824e-08	152	1392	0.109	OXTR CD82 GPR68 CD81 CELSR1 GRPR ICAM1 IL27RA AQP1 EPS8 GPR176 EDNRA PALM ADORA1 KDR LEPR IL6R SLC16A3 SLC16A4 CMKLR1 IL13RA1 SLC16A5 PDGFRB CHRNB1 EPHA4 PDGFRA CXADR IL4R IL11RA F2R HLA-B HLA-C CNPY2 CYBA HLA-A ATP1B1 TM4SF1 EREG BCAM CLDN4 SCN8A KCTD11 ROR2 KCTD15 EPHA3 ABCG1 SLC22A4 NOTCH3 PTGFR SDC4 SDC2 SLC5A3 HRH1 SYNGR2 TSPAN9 PODXL TSPAN4 ST3GAL5 KCNMB4 TNFRSF14 KCNN4 NTSR1 ABCA1 FZD2 FZD…	0	0	DN in EWS								0	0	DN in siEF	75	cell cycle checkpoint	8.5797e-11	27	873	0.03	RB1 BLM BUB1B BRCA1 BRIP1 CCNB1 CDC45 CCND1 CHEK2 RBBP8 KNTC1 CLSPN GTSE1 BUB1 CDT1 TIPIN PLK1 KNL1 SMC1A FANCG ZWINT TICRR CENPE CENPF BIRC5 DTL MAD2L1	0	0	UP in siEF&EEF	7517	muscle organ development	7.9794e-08	53	1778	0.029	ACHE FHL1 TNC CBY1 SIX1 FGFRL1 SGCE SIX4 SGCB SPEG CCN1 SOX6 SNTA1 CTSB MEF2C CXADR IGFBP5 LMO4 GAA TPM1 F2R ARID5B TGFBR3 MYL6 RCN1 TEP1 SCN8A ITGA7 TAGLN2 OBSL1 HBEGF LAMA5 IGSF8 TAGLN FOXC1 SEMA3C TSHZ3 TWIST1 FOXO4 LMNA ERBB2 FLNB DMD MSX1 MEF2D SVIL TGFB2 LIF MAPK12 VEGFA SMAD7 RCAN1 AGRN	0	0
UP in EWS	50795	regulation of behavior	4.7607e-05	11	437	0.025	GREM1 ANGPT2 CXCL8 SERPINE1 PDGFB KDR CASP1 VEGFC F2RL1 CDH13 THBS1	0	0	UP in siEF	42221	response to chemical stimulus	3.4118e-08	180	1392	0.129	SLC27A1 OXTR SERPINE1 TNC PLOD3 PLAT AHR ETS1 CXCL14 AQP1 CXCL16 EPS8 EDNRA PLAU CREB3L1 CREB3L2 PIM1 LEPR CYP1B1 FBXO6 CCN2 CCN1 IL6R RGS9 CMKLR1 PDGFRB CHRNB1 PDGFRA CUBN WNT5B TPM1 IGFBP2 F2R VASH1 ATP1B1 PGF EREG LOX PRKAR1B DDIT3 DDIT4 TXNIP NEIL1 SCG2 EPHA3 ABCG1 SLC22A5 EPAS1 SDC2 PDGFB PDGFA LPL PIK3R3 AK4 BCL10 PLD1 NDRG1 FOXO1 SOCS3 SOCS1 IRAK2 S100A16 STC2 HMOX1 KCNMB4 IGFBP7 APOE A2M …	0	0	DN in EWS								0	0	DN in siEF	32553	ribonucleotide binding	1.4553e-10	157	873	0.179	DGKG ERCC6L BUB1B TTF2 MKI67 ABCA13 SMC4 SMC2 DOCK10 CHEK2 SACS ENPP1 MAP3K4 EARS2 EPHA5 EPHA7 LIG1 DAPK1 PRKCB DDX11 MYH15 UBE2E1 ATP11C VRK1 LIG3 HASPIN PASK UHMK1 MELK MTHFD1 KATNAL1 PRKD1 DNA2 KIF20B FKBP4 DGKK IPPK PIF1 BLM SRCAP PRKDC ARX PKMYT1 KALRN AK7 RHOBTB2 BRIP1 HSPH1 DHX33 GRK5 ORC1 FIGNL1 HLTF DHX37 NLRP2 MDN1 VARS1 MAP2K6 PLK4 HSPA9 TRAP1 HSPA8 DNAH10 ABCA5 FANCM XRCC2 PLK1 PAICS …	0	0	UP in siEF&EEF	45121	membrane raft	8.9815e-08	41	1778	0.023	CFD OPRD1 STX12 SLC27A1 SDC4 RGS16 ITPR1 SLC2A1 FURIN BCL10 EFNA5 PTGS2 ADCY6 GNAI2 SPRED1 GJA3 PRKAR2B PODXL BSG ERBB2 HMOX1 STOM DMD LDLR CD55 CTSB ABCA1 PRNP SMURF2 ITGA1 F2R PRKCA ATP1B1 RGMB TGFBR2 ADAM17 RTN4RL1 DLC1 CD24 BIRC2 RHOQ	0	0
UP in EWS	5578	proteinaceous extracellular matrix	4.7607e-05	24	437	0.054	COL11A1 LAMA4 COL12A1 OMD MMP3 NPNT LTBP1 MMP10 ASPN THSD4 FBLN5 DCN CLGN COL1A1 ADAMTS3 COL5A3 TIMP2 MMP19 COL8A1 CCN2 ADAMTS9 MATN3 CTHRC1 MATN2	0	0	UP in siEF	16477	cell migration	5.0095e-08	54	1392	0.038	NRP1 BTG1 CXCL8 SIX1 PLAT LYST ICAM1 CXCL16 CDH2 NCK2 CCN2 IL6R PDGFRB ITGA4 S100A2 TNFRSF12A SHROOM2 ARID5B TGFBR1 TGFBR3 MMP14 VCAN CEACAM1 CDH13 ITGA6 ULK1 AJUBA SCG2 CD44 LAMA5 FOXC1 SEMA3C PDGFB SEMA3F THBS1 SGPL1 PODXL CCL2 FYN CTHRC1 TGFB2 JUP LAMB2 FN1 VEGFC DCLK1 NR4A2 COL5A1 GIPC1 ITGA11 PLXNB1 CD24 MDGA1 BCAR1	0	0	DN in EWS								0	0	DN in siEF	32555	purine ribonucleotide binding	1.4553e-10	157	873	0.179	DGKG ERCC6L BUB1B TTF2 MKI67 ABCA13 SMC4 SMC2 DOCK10 CHEK2 SACS ENPP1 MAP3K4 EARS2 EPHA5 EPHA7 LIG1 DAPK1 PRKCB DDX11 MYH15 UBE2E1 ATP11C VRK1 LIG3 HASPIN PASK UHMK1 MELK MTHFD1 KATNAL1 PRKD1 DNA2 KIF20B FKBP4 DGKK IPPK PIF1 BLM SRCAP PRKDC ARX PKMYT1 KALRN AK7 RHOBTB2 BRIP1 HSPH1 DHX33 GRK5 ORC1 FIGNL1 HLTF DHX37 NLRP2 MDN1 VARS1 MAP2K6 PLK4 HSPA9 TRAP1 HSPA8 DNAH10 ABCA5 FANCM XRCC2 PLK1 PAICS …	0	0	UP in siEF&EEF	5886	plasma membrane	9.2633e-08	475	1778	0.267	CHIC2 PATJ TES SERPINE2 F11R FGFRL1 EPS8 SCAMP5 GPR176 CNST ALCAM GJA3 HOMER3 TMEM8B CXADR UNC13A PRKCD PRKCA FRS3 BCAM PARD3 GPR161 FREM2 SKAP2 TTYH3 COL13A1 TPRG1L BCL10 SLC5A3 EPB41L1 MYO6 ST3GAL5 HMOX1 KCNMB4 ABCA1 FZD2 JUP FZD5 HOMER2 MCAM ABCA3 FZD7 FZD6 L1CAM GRIN2C AIF1L GRIN2D EHD1 COL1A1 EHD2 CYLD PPFIBP1 EHD3 FAT3 DCHS1 ACHE ARF4 DENND1A TGFB1I1 SHB ASGR1 TMEM47 PANX2 UBL3 APPL2 CGNL1 …	0	0
UP in EWS	23046	signaling process	4.8508e-05	88	437	0.201	NRP1 FLT1 CXCL8 PIK3CD ADM VLDLR RND3 TNFSF13B EPS8 RGS4 ARHGAP42 PCLO ANKRD1 RAC2 PDE4B CASP1 CCN1 RALGPS2 DUSP4 EPHA4 CARD10 GUCY1A2 DUSP2 PLLP TNFRSF18 PDE4D ITGA1 FOS DUSP8 NGF GEM RHOB RAB32 GPRC5A RAB31 VGF IL1B ARHGEF3 RAPGEF2 CDH13 TRIB1 MET TLR3 HBEGF PTGES TLR2 CDS1 OPRD1 PTGER4 CD274 RASL12 RTN1 CALCB EPAS1 ITPR1 LY96 NEDD9 NTS THBS1 GNAI1 SDCBP SOCS1 IRAK2 HMOX1 ABL2 DMD FYN S1PR2 NPT…	0	0	UP in siEF	30155	regulation of cell adhesion	5.3277e-08	36	1392	0.025	CD63 LAMA5 CXCL8 SDC4 CSF1 SERPINE2 LAMA4 SERPINE1 FGF1 NID1 THBS1 ICAM1 FSTL3 CYTH3 PLAU PODXL ERBB2 SPP1 KDR CCN1 TGM2 COL26A1 TGFB2 GSN SMAD3 TPM1 L1CAM SMAD7 COL1A1 MMP14 CCDC80 CDK6 CDH13 ITGA6 FXYD5 TGFBI	0	0	DN in EWS								0	0	DN in siEF	166	nucleotide binding	3.5081e-10	181	873	0.207	DGKG ERCC6L BUB1B TTF2 MKI67 ABCA13 SMC4 SMC2 DOCK10 RAVER1 CHEK2 RAVER2 SACS ENPP1 MAP3K4 EARS2 EPHA5 EPHA7 LIG1 DAPK1 PRKCB DDX11 MYH15 UBE2E1 ATP11C VRK1 LIG3 HASPIN KMO PASK UHMK1 MELK MTHFD1 KATNAL1 MATR3 PRKD1 DNA2 KIF20B FKBP4 DGKK STEAP1 STEAP2 IPPK PIF1 BLM SRCAP PRKDC ARX PKMYT1 KALRN AK7 RHOBTB2 BRIP1 HSPH1 NDOR1 DHX33 GRK5 ORC1 FIGNL1 HLTF G3BP2 DHX37 NLRP2 PPARGC1B MDN1 RBM11 VARS1 M…	0	0	UP in siEF&EEF	30054	cell junction	1.061e-07	97	1778	0.054	PATJ OXTR TES F11R AMOT TGM1 SCAMP5 GJA3 CDH2 HOMER3 TNS2 CAST CHRNB1 CXADR UNC13A ACTN1 LMO7 TANC1 ADAM15 PARD3 TLN2 AJUBA OBSL1 STX1A VCL SDC4 FBLIM1 TPRG1L LIN7A CD99L2 LPP CNN2 SYNGR1 PDZD2 NPHP1 JUP HOMER2 PARVA PARVB GRIN2C SYT7 AIF1L GRIN2D OCLN ARHGAP31 SDC1 NF2 ACHE PTPRU SYNM PRR7 CLIC4 B4GALT1 ITGB5 SH3KBP1 DENND1A TGFB1I1 FHL2 SLC2A1 PIK3CD PTPRJ TMEM47 PANX2 LASP1 NCS1 PSD3 CGNL1 SNT…	0	0
UP in EWS	23060	signal transmission	4.8508e-05	88	437	0.201	NRP1 FLT1 CXCL8 PIK3CD ADM VLDLR RND3 TNFSF13B EPS8 RGS4 ARHGAP42 PCLO ANKRD1 RAC2 PDE4B CASP1 CCN1 RALGPS2 DUSP4 EPHA4 CARD10 GUCY1A2 DUSP2 PLLP TNFRSF18 PDE4D ITGA1 FOS DUSP8 NGF GEM RHOB RAB32 GPRC5A RAB31 VGF IL1B ARHGEF3 RAPGEF2 CDH13 TRIB1 MET TLR3 HBEGF PTGES TLR2 CDS1 OPRD1 PTGER4 CD274 RASL12 RTN1 CALCB EPAS1 ITPR1 LY96 NEDD9 NTS THBS1 GNAI1 SDCBP SOCS1 IRAK2 HMOX1 ABL2 DMD FYN S1PR2 NPT…	0	0	UP in siEF	7160	cell-matrix adhesion	6.4805e-08	26	1392	0.018	SNED1 LAMA5 ITGB5 ITGB4 NID1 NID2 FBLN5 THBS3 SGCE BCL2L11 ITGB8 ITGAV CCN2 TMEM8B ITGA3 ACTN1 COL3A1 BCAM ADAM15 COL5A3 ITGA10 ITGA11 ITGBL1 ITGA6 AJUBA CD44	0	0	DN in EWS								0	0	DN in siEF	10564	regulation of cell cycle process	3.5678e-10	30	873	0.034	RB1 CCNF BRCA1 PKMYT1 FOXM1 BRCA2 CCNB1 RCC1 KNTC1 FBXO5 GTSE1 BUB1 DLGAP5 PLK4 CDT1 GABBR1 TIPIN BORA EGF IGF1 FANCB SMC1A CENPE ANLN TPX2 CENPF ESPL1 TIMELESS BIRC5 KIF20B	0	0	UP in siEF&EEF	22604	regulation of cell morphogenesis	1.0739e-07	41	1778	0.023	RTN4R ROBO2 NRP1 NUMBL FBLIM1 TGFB1I1 SEMA3A SEMA3F CORO1A RTN4 CDH2 PDPN PALM NEFL NEFM FYN NRCAM APOE PLXNA3 APC2 WWTR1 TGFB2 SMAD3 TNFRSF12A METRN FN1 SHROOM3 VEGFA SMAD7 EFNA1 CDC42EP4 DLC1 CDC42EP3 ITGA7 PLXNB2 MYH9 CDC42EP1 PLXNB1 ULK1 RHOQ GAS7	0	0
UP in EWS	50793	regulation of developmental process	4.8775e-05	43	437	0.098	PTGER4 ERRFI1 NRP1 BTG1 SERPINE2 LAMA4 SERPINE1 PDGFA PTGS2 FOXO3 HDAC9 ETS1 THBS1 APOLD1 AMOT BOC TIMP2 KDR HMOX1 FYN SOX8 NKX3-1 KLF10 JUN TGFB2 CXADR ANGPT2 TNFRSF12A ANXA3 LIF ISLR2 VEGFC NGF DKK1 ASPN RHOB GREM1 IL1B MAFF TRIB3 CD24 TLR3 ABCG1	0	0	UP in siEF	5583	fibrillar collagen	8.2096e-08	9	1392	0.006	COL1A1 COL3A1 COL2A1 COL1A2 COL5A1 COL11A1 COL5A3 COL11A2 COL5A2	0	0	DN in EWS								0	0	DN in siEF	44454	nuclear chromosome part	2.7852e-09	28	873	0.032	PIF1 BLM PCNA MCM7 PRIM1 MACROH2A2 CENPA AURKB POLD3 PURB CCNB1 SLX4 TERT RCC1 RAD54L BUB1 SUZ12 TIPIN PLK1 SGO1 POLA1 RAD50 INCENP TCP1 MCM3 TIMELESS NCAPD3 MCM2	0	0	UP in siEF&EEF	19838	growth factor binding	1.0843e-07	33	1778	0.018	NRP1 BMPR2 FLT1 HTRA1 LTBP4 PDGFA FURIN LTBP3 PCSK6 LTBP1 FGFRL1 S100A13 SEC61B CCN1 IL6R ACVR1 IL4R IGFBP5 IGFBP4 IGFBP2 CRIM1 KAZALD1 IGF2R TGFBR1 TGFBR2 COL1A1 TGFBR3 COL2A1 COL5A1 COL4A1 COL6A1 FGFR3 FGFR1	0	0
UP in EWS	30198	extracellular matrix organization	7.3152e-05	13	437	0.029	FOXC2 PDGFRA TGFB2 COL11A1 COL12A1 OLFML2A DCN COL1A1 ADAMTS3 COL5A3 BCL3 CCN2 CCN1	0	0	UP in siEF	5488	binding	8.3993e-08	1065	1392	0.765	ZNF296 AVIL ZFYVE1 SCAMP5 ISLR TDO2 TMEM8B MEF2C CXADR UNC5B UNC5C BHLHA15 HSPG2 SIGIRR CH25H MYL6 CLDN4 PRKAR1B DDIT3 ETHE1 ORAI3 RBP1 ORAI2 TXNIP SPARCL1 MYL9 ATF3 OPTN SKAP2 ZBTB8A NLRX1 MTMR3 LXN CRABP2 HHLA3 CRABP1 PDGFB PDGFA ADAMTS10 ADAMTS15 RNF215 EPB41L1 RDH10 PDGFC MYO6 KCNMB4 GTF2IRD2B ABCA1 JUN BTBD19 JUP FUCA1 ABCA3 ABCA4 EDEM2 PBX3 EIF2AK3 FN1 PBX4 L1CAM GRIN2C AIF1L COL1A1 ABTB1 P…	0	0	DN in EWS								0	0	DN in siEF	43170	macromolecule metabolic process	4.0463e-09	278	873	0.318	PGLYRP2 POP1 CCNF NUDT1 RAX ALKBH8 CDC20 LIPE CHEK2 PSMD3 EPC1 EARS2 EPHA5 EPHA7 ST6GAL1 TIPIN ALG6 DAPK1 PRKCB ESCO2 HASPIN PASK PHKA2 WDR77 UHMK1 ARC NEIL3 PADI2 PRKD1 DNA2 TTLL12 ENPEP PRKDC ARX RPAP1 KALRN C5 BRIP1 TERT HLTF ST8SIA5 NAALAD2 NAA50 PLK4 NGFR TRAP1 CDT1 PRPF38A BCL11B SIAH3 XRCC2 PLK1 EAF2 NFATC3 IGF1 PA2G4 GDF6 CCT6A POLA1 PPP1R1A AGO2 DUS1L TP73 RET TOP2A HBS1L FEN1 SUV39H1 BR…	0	0	UP in siEF&EEF	5509	calcium ion binding	1.1116e-07	111	1778	0.062	SPARC CLSTN3 PROS1 DGKA TNC CBLB CIB1 CELSR1 CELSR3 CDH2 CAPN2 PLS3 CCN1 ACTN1 HPCAL1 ACTN4 NPNT MYL5 MYL6 FKBP7 FKBP9 FREM2 NOTCH3 LTBP4 FBLN1 LTBP3 NID1 PCDH18 NID2 LTBP1 MYL12A FBLN5 HSP90B1 SCUBE3 S100A13 RAB11FIP4 S100A11 S100A10 HSPA5 EDEM2 SYT7 LRP1B AIF1L EHD1 EHD2 MEX3B EHD3 BMP1 FAT3 DCHS1 CALM3 LRP10 CALM2 FBN1 NRP1 FKBP10 SNED1 NRP2 CETN2 PIK3CD VLDLR PKD2 SGCE EFCAB2 NCS1 APC2 DST SS…	0	0
UP in EWS	2376	immune system process	8.411e-05	48	437	0.109	OPRD1 PTGER4 COLEC12 CD274 IFITM2 CXCL8 EPAS1 FHL1 CEBPG EBI3 PDGFB IL20RB LY96 BCL10 HDAC9 ETS1 NDRG1 THBS1 TNFSF13B ICAM1 NFIL3 IRAK2 KDR CASP1 FYN APOL1 CD55 TGFB2 VCAM1 ANXA3 CCL20 ITGA1 LIF PDCD1LG2 MR1 GEM BST1 SNRK IL1B IRF1 BCL3 SERPING1 PTX3 PDCD1 CD24 ULBP1 TLR3 TLR2	0	0	UP in siEF	51272	positive regulation of cellular component movement	8.3993e-08	34	1392	0.024	COL18A1 FLT1 CSF1 SERPINE1 PDGFB PDGFA PLD1 PTGS2 ETS1 THBS1 ICAM1 CXCL16 PODXL KDR CCL2 TAC1 IL6R PDGFRB PDGFRA TGFB2 SMAD3 WNT5B ANXA3 SPHK1 F2R VEGFC RRAS2 F3 TGFBR1 F2RL1 CDH13 ROR2 BCAR1 HBEGF	0	0	DN in EWS								0	0	DN in siEF	51716	cellular response to stimulus	5.3531e-09	96	873	0.109	DCLRE1B TOP2A DCLRE1A FEN1 RIF1 MCM7 ITGB2 NUDT1 BCCIP RAX IRS2 BRCA1 HMGB1 BRCA2 ALKBH8 RPTOR CHAF1B CHAF1A GNGT2 CCND1 PTTG1 EME1 EXO1 CHEK2 ENPP1 GTSE1 POLE MAP3K4 TP63 RFC5 PRMT6 SHPRH RFC3 TIPIN RFC4 SYK LIG1 RFC2 RAD23A LIG3 KIF22 ESCO2 SMC1A RP1 NEIL3 FANCD2 TFEC ATG4C TIMELESS DNA2 DTL MCM2 BLM PCNA HLF PRKDC FAAP24 PDXP PIK3R1 TYMS POLD3 RAD51AP1 FGD4 BRIP1 CCNB1 SLX4 POLD1 E2F1 RBBP8 RA…	0	0	UP in siEF&EEF	43062	extracellular structure organization	1.129e-07	43	1778	0.024	ACHE COL18A1 FOXC1 TNXB B4GALT1 COL11A2 TNC NRXN2 LAMC1 NID1 CST3 LGALS3 ADAMTS3 CDH2 MYO6 ERBB2 SERPINH1 EMILIN1 NRCAM CCN1 SNTA1 TGFB2 ANXA2 LAMB2 F2R KAZALD1 TGFBR1 NFKB2 DNM3 COL1A1 CCDC80 COL2A1 P4HA1 LOX COL5A1 COL4A2 COL6A2 PXDN BCL3 COL5A2 VWA1 AGRN RECK	0	0
UP in EWS	32879	regulation of localization	8.7611e-05	40	437	0.091	OPRD1 NRP1 FLT1 SERPINE2 LAMA4 SERPINE1 PDGFB PDGFA PTGS2 HDAC9 ETS1 THBS1 ICAM1 AMOT JPH2 KDR CASP1 HMOX1 TAC1 DRD4 PDGFRA TGFB2 ANGPT2 ANXA3 LIF VEGFC NGF GREM1 IL1B BCL3 F2RL1 CDH13 TRIB3 PTX3 PKIG TRIB1 TLR3 ABCG1 HBEGF TLR2	0	0	UP in siEF	40017	positive regulation of locomotion	8.3993e-08	34	1392	0.024	COL18A1 FLT1 CXCL8 CSF1 SERPINE1 PDGFB PDGFA PLD1 PTGS2 THBS1 ICAM1 CXCL16 PODXL KDR CCL2 TAC1 IL6R PDGFRB PDGFRA TGFB2 SMAD3 WNT5B ANXA3 SPHK1 F2R VEGFC RRAS2 F3 F2RL1 CDH13 ROR2 SCG2 BCAR1 HBEGF	0	0	DN in EWS								0	0	DN in siEF	44430	cytoskeletal part	1.6551e-08	93	873	0.106	RB1 RIF1 CCNF KIF14 DNHD1 BUB1B BRCA1 KIF11 BRCA2 MYOM2 KIF15 LMNB1 CDC20 TUBA1B NETO1 KIF1C DLGAP1 KNTC1 FBXO5 KIF1A GTSE1 DLGAP5 CEP55 LRRCC1 ACTN2 MYH15 USP2 HAUS4 KIF24 KIF23 HAUS6 KIF22 RANGAP1 CKAP5 SGO1 ASPM RP1 ARC ESPL1 KATNAL1 INCENP KIFC1 TCP1 MCM3 PKP1 BIRC5 KIF2C MNS1 KIF20B FKBP4 DTL SHANK1 EPB41 SKA3 AURKB AURKA SKA2 CCNB1 CDC45 KLC2 RACGAP1 ERBB4 FAM83D BUB1 DYNC1I1 CCT5 PLK4 DNAH…	0	0	UP in siEF&EEF	7160	cell-matrix adhesion	1.2188e-07	29	1778	0.016	ITGB1 SNED1 LAMA5 COL13A1 ITGB5 ITGB4 NID1 PKD2 NID2 PKD1 FBLN5 THBS3 SGCE BCL2L11 ITGAV PDK1 TMEM8B ITGA3 ITGA2 ACTN1 ITGA1 BCAM ADAM15 ITGA10 DLC1 ITGA7 ITGA6 AJUBA VCL	0	0
UP in EWS	48520	positive regulation of behavior	8.7611e-05	9	437	0.02	CXCL8 SERPINE1 PDGFB KDR CASP1 VEGFC F2RL1 CDH13 THBS1	0	0	UP in siEF	5912	adherens junction	1.7951e-07	33	1392	0.023	SYNM OXTR ITGB5 SDC4 FBLIM1 TGFB1I1 FHL2 NTN4 NEXN NEDD9 LPP TGM1 PDLIM2 CDH2 NPHP1 PDLIM7 TNS2 CXADR JUP ACTN1 SHROOM2 PARVA LMO7 PARVB WTIP AIF1L ADAM15 ZYX SDC1 ITGA6 AJUBA LIMS2 BCAR1	0	0	DN in EWS								0	0	DN in siEF	3777	microtubule motor activity	2.1786e-08	20	873	0.022	DNAH10 KIF14 DNHD1 KIF24 KIF23 KIF11 KIF22 SMC1A KIF15 CENPE KIF18A KLC2 KIF18B KIFC1 KIF4A KIF1C KIF2C KIF1A KIF20B DYNC1I1	0	0	UP in siEF&EEF	42221	response to chemical stimulus	1.3028e-07	216	1778	0.121	OXTR ABAT ENO3 EPS8 EDNRA RPS6KA5 GJA3 CREB3L4 CREB3L1 BSG CREB3L2 CYP1B1 CCN1 JUNB PDK1 CPT1A ATP6V0E1 SERPINF1 ENTPD6 PRKCA ACTN4 PRKAR1B PRKAR1A TEP1 DDIT3 DDIT4 TXNIP NEIL1 EPHA3 SLC22A5 EPAS1 SDC2 PDGFA PIK3R3 BCL10 PRDX5 PRKAR2B STC2 SERPINH1 HMOX1 KCNMB4 APOE VAT1 JUN JUP ABCA3 FZD7 EDEM2 EIF2AK3 MANF FOSL1 COL1A1 NCEH1 ID1 SDC1 ID3 HYOU1 CALM3 CD24 CALM2 ROBO2 COL18A1 PTPRU NRP2 RARG CLIC…	0	0
UP in EWS	16265	death	9.3596e-05	39	437	0.089	PPP1R15A CSRNP1 ITPR1 TNFAIP3 BCL10 FOXO3 THBS1 BBC3 CECR2 DRAM1 APH1B CASP1 HMOX1 APOL1 PHLDA1 IER3 BOK JUN TGFB2 GADD45B TNFRSF12A GADD45A TNFRSF18 NGF FOSL2 RHOB GULP1 NR4A2 GREM1 RNF144B RYBP IL1B DDIT4 ARHGEF3 TPP1 PTPN6 TRIB3 PDCD1 MET	0	0	UP in siEF	30335	positive regulation of cell migration	2.0664e-07	32	1392	0.022	COL18A1 FLT1 CSF1 SERPINE1 PDGFB PDGFA PLD1 PTGS2 THBS1 ICAM1 CXCL16 PODXL KDR CCL2 TAC1 IL6R PDGFRB PDGFRA TGFB2 SMAD3 WNT5B ANXA3 SPHK1 F2R VEGFC RRAS2 F3 F2RL1 CDH13 ROR2 BCAR1 HBEGF	0	0	DN in EWS								0	0	DN in siEF	44237	cellular metabolic process	2.5128e-08	327	873	0.374	SLC23A2 AHCYL2 PGLYRP2 POP1 CCNF NUDT1 RAX ENO2 ALKBH8 CDC20 PREX1 LIPE PNP CHEK2 PSMD3 EPC1 EARS2 EPHA5 EPHA7 ST6GAL1 TIPIN ALG6 DAPK1 PRKCB DDX11 ESCO2 HASPIN PASK ISL1 PHKA2 ASRGL1 WDR77 UHMK1 ARC NEIL3 MTHFD1 FDX1 PADI2 PRKD1 DNA2 TTLL12 PRKDC PDE1B ARX PIK3R1 RPAP1 KALRN C5 BRIP1 TERT FIGNL1 INPP5D HLTF SLC19A3 ST8SIA5 NAALAD2 NAA50 PLK4 NGFR TRAP1 CDT1 PRPF38A BCL11B SIAH3 XRCC2 PLK1 EAF2 N…	0	0	UP in siEF&EEF	70161	anchoring junction	1.5315e-07	41	1778	0.023	SYNM OXTR TES B4GALT1 ITGB5 SDC4 FBLIM1 SH3KBP1 TGFB1I1 FHL2 NEXN LPP TGM1 LASP1 CDH2 NPHP1 PDLIM7 TNS2 CXADR JUP ITGA2 ACTN1 SHROOM3 PARVA LMO7 PARVB WTIP AIF1L ARHGAP31 ADAM15 PARD3 DLC1 ZYX SDC1 MYH9 ITGA6 TLN2 NF2 AJUBA BCAR1 VCL	0	0
UP in EWS	10953	regulation of protein maturation by peptide bond cleavage	9.3596e-05	5	437	0.011	SERPINE2 SERPINE1 SERPING1 A2M THBS1	0	0	UP in siEF	23051	regulation of signaling process	2.2061e-07	108	1392	0.077	ERRFI1 CSF1 GOLT1B CD81 SERPINE1 RGS4 RGS3 CDH2 PLAU LEPR MAP3K6 IL6R RGS9 TGM2 CARD10 IGFBP3 PRKCD F2R MAPK8IP2 MID1 MAPK8IP1 EREG SIGIRR DDIT4 S100A4 TRIB2 SCG2 FICD PDGFB BCL10 FOXO1 SOCS3 SOCS1 IRAK2 PSAP S100A13 HMOX1 APOE TBC1D17 RALGDS TGFB2 IQSEC2 NEK6 PLK2 EIF2AK3 LIF L1CAM ADAP1 BST2 EFNA1 CD24 MAP3K14 SLC44A2 SECTM1 ECE1 ARHGEF10L SIPA1L2 LITAF AKAP12 MCF2L PSD4 TIMP2 NCK2 EVI5L LMCD1 …	0	0	DN in EWS								0	0	DN in siEF	8150	biological_process	2.6026e-08	769	873	0.88	PGLYRP2 POP1 TMEM97 CLDN1 ALKBH8 PREX1 LIPE LIPI PSMD3 C3AR1 GTSE1 UNC5A TSTD2 FNBP1 RFX2 ISL1 PHKA2 SLC5A6 MTHFD1 PSME4 PADI2 PIF1 CDCA2 TTYH2 CDCA3 CDCA5 CDCA7 NCAPG THY1 NCAPH CYB5R2 C5 HSPH1 FIGNL1 HMGXB3 PPARGC1B GSTM4 NGFR PRPF38A GSTM1 ABCA5 EXOC6B NR0B1 FLI1 AGO2 SASS6 SFXN1 CYB5RL STRN SFXN2 EZH2 NCAPG2 HOXC12 JPH1 ARHGAP4 CHAF1B TUBA1B CHAF1A SMPD1 DLGAP1 TPSAB1 DLGAP5 CHST8 CLUL1 ARG2 …	0	0	UP in siEF&EEF	48705	skeletal system morphogenesis	1.8116e-07	35	1778	0.019	DLX2 RARG COL13A1 SATB2 COL11A2 SIX1 PKD1 SGPL1 SIX4 CHST11 RDH10 SOX9 MEF2D NKX3-2 TBX1 TFAP2A SMAD3 EYA1 PRRX1 MMP2 ARID5B TGFBR1 TGFBR2 COL1A1 ZEB1 COL2A1 BMP1 HOXB4 HOXB3 HOXB2 ROR2 HOXB8 HOXB7 HOXB6 HOXB5	0	0
UP in EWS	70613	regulation of protein processing	9.3596e-05	5	437	0.011	SERPINE2 SERPINE1 SERPING1 A2M THBS1	0	0	UP in siEF	9719	response to endogenous stimulus	2.9605e-07	77	1392	0.055	PCSK1 PTPRU SLC27A1 OXTR BTG1 PTPRO SERPINE1 FHL2 PLOD3 PLAT ADM AQP1 LEPR CCN2 CCN1 IL6R RGS9 CTSB VKORC1 PDGFRA ANXA3 GPX3 SPHK1 IGFBP2 NGF F3 PGF TGFBR1 EREG TGFBR3 MMP14 GAL LOX PRKAR1B VGF DDIT3 TXNIP CDH13 PPARA MFGE8 CRYAB BIRC2 RHOQ ABCG1 FOXC2 PDGFB PDGFA PIK3R3 LCAT AK4 PLD1 PTGS2 THBS1 ADCY6 FOXO1 SOCS3 SOCS1 GNG4 ERBB2 SPP1 HMOX1 CCL2 IGFBP7 A2M TAC1 TGFB2 MAPK15 ASS1 FOSL1 COL1A1 NR4…	0	0	DN in EWS								0	0	DN in siEF	226	microtubule cytoskeleton organization	3.0041e-08	28	873	0.032	BUB1B KIF11 BRCA2 CENPA AURKA TUBA1B RCC1 FBXO5 SPAG5 HAUS4 KIF23 HAUS6 FANCB KNL1 SMC1A CKAP5 ZWINT SGO1 KIF18A ESPL1 HOOK1 CENPJ SASS6 TACC3 TUBGCP3 KIF2C TUBGCP4 SPC25	0	0	UP in siEF&EEF	1525	angiogenesis	1.8492e-07	41	1778	0.023	NRP1 COL18A1 LAMA5 NOTCH3 FLT1 B4GALT1 CXCL8 EPAS1 PDGFA SHB APOLD1 RTN4 EDNRA LEPR HMOX1 CCN1 ACVR1 JUN TGFB2 TNFRSF12A ANXA2 MMP2 FN1 VEGFC HSPG2 PGF VEGFA TGFBR2 MMP14 KLF5 ADAM15 TEP1 COL4A1 ID1 MYH9 HOXB3 CSPG4 ITGA5 MFGE8 PLCD3 FGFR1	0	0
UP in EWS	8285	negative regulation of cell proliferation	0.00012438	26	437	0.059	CD274 BTG1 CXCL8 IL20RB ADM PTGS2 ETS1 THBS1 GPNMB TIMP2 HMOX1 MSX1 NKX3-1 KLF10 JUN TGFB2 CXADR TNFRSF9 LIF PDCD1LG2 KLF4 RUNX3 IL1B CDH13 TRIB1 PTGES	0	0	UP in siEF	9966	regulation of signal transduction	2.9938e-07	107	1392	0.076	ERRFI1 CSF1 GOLT1B CD81 SERPINE1 RGS4 RGS3 CDH2 PLAU LEPR MAP3K6 IL6R RGS9 TGM2 CARD10 IGFBP3 PRKCD F2R MAPK8IP2 MID1 MAPK8IP1 EREG SIGIRR DDIT4 S100A4 TRIB2 SCG2 FICD PDGFB BCL10 FOXO1 SOCS3 SOCS1 IRAK2 PSAP S100A13 HMOX1 APOE TBC1D17 RALGDS TGFB2 IQSEC2 NEK6 PLK2 EIF2AK3 LIF L1CAM ADAP1 BST2 EFNA1 CD24 MAP3K14 SLC44A2 SECTM1 ARHGEF10L SIPA1L2 LITAF AKAP12 MCF2L PSD4 TIMP2 NCK2 EVI5L LMCD1 ARFGE…	0	0	DN in EWS								0	0	DN in siEF	5657	replication fork	3.0041e-08	13	873	0.014	RFC5 BLM DNMT1 RFC3 PCNA RFC4 RFC2 PRIM1 EAF2 POLD3 PURB POLA1 MCM3	0	0	UP in siEF&EEF	48468	cell development	2.1416e-07	111	1778	0.062	TNC MSI2 CLU CELSR3 EDNRA ALCAM KIF5C NRCAM SOX8 SOX9 CCN1 SOX6 ACVR1 CHRNB1 EPHA4 CXADR WNT5B UNC5B TPM1 F2R UNC5C PRKCA MAPK8IP3 PARD3 ULK2 ULK1 OBSL1 EPHA2 RTN4R NOTCH3 NUMBL EPAS1 SDC2 STXBP1 EFNA5 FOXO3 EFNB3 CHST11 RDH10 MYO6 PSAP APOE PLXNA3 BBS2 TGFB2 EIF2B2 SMAD3 FZD5 FN1 EIF2AK3 LIF HSPA2 L1CAM DCLK1 NR4A2 RCAN1 GNAQ ID1 SDC1 BCL2L1 FGFR1 CDKN1C ROBO2 ACHE NRP1 COL18A1 NRP2 B4GALT1 ADM …	0	0
UP in EWS	1871	pattern binding	0.00012484	16	437	0.036	SERPINE2 COL25A1 FSTL1 THBS1 DCN ADAMTS3 GPNMB LIPH COL5A3 RSPO2 RSPO3 PTX3 CCN2 CCN1 HBEGF TLR2	0	0	UP in siEF	23046	signaling process	3.1567e-07	240	1392	0.172	OXTR CBLB EPS8 GPR173 GPR176 EDNRA ALCAM RPS6KA2 FBXO6 CCN1 IL15RA EPHA4 UNC5B PRKCD UNC5C BHLHA15 MAPK8IP2 ANK1 MAPK8IP1 EREG SIGIRR BCAM PRKAR1B RRAGC RRAGB SPARCL1 ULK2 RIN3 ULK1 RIN2 OPTN EPHA3 SKAP2 PTGES CRABP2 EPAS1 CRABP1 MICAL1 MYO6 PENK HMOX1 KCNMB4 APOE RALGDS S100A11 NTSR1 S100A10 TNFSF18 ABCA1 CDK18 JUN FZD2 FZD5 GADD45B ABCA4 EIF2AK3 RASSF7 RAB27A GRIN2C COL1A2 PCDHB2 PTK7 PPP1R1C T…	0	0	DN in EWS								0	0	DN in siEF	17111	nucleoside-triphosphatase activity	4.0524e-08	73	873	0.083	TOP2A HBS1L ERCC6L MCM7 NUDT1 KIF14 DNHD1 KIF11 TTF2 CHTF18 ABCA13 KIF15 TUBA1B GNGT2 KIF1C KIF1A RFC5 HELLS SHPRH RFC3 RFC4 RFC2 DDX11 MYH15 ATP11C KIF24 DDX54 KIF23 KIF22 SMC1A KATNAL1 KIFC1 MCM3 MCM4 KIF2C MCM6 DNA2 KIF20B MCM2 PIF1 BLM SRCAP DDX21 MTIF2 ATP1A1 HSPD1 GNA14 BRIP1 KLC2 DHX33 ORC1 FIGNL1 HLTF DHX37 MFN2 RAD54L LONRF1 MDN1 DYNC1I1 ABCF1 HSPA8 DNAH10 ABCA5 ATAD5 MYO10 FANCM XRCC2 A…	0	0	UP in siEF&EEF	48699	generation of neurons	2.202e-07	106	1778	0.059	SERPINE2 RORA CLU CELSR3 ALCAM CDH2 KIF5C NRCAM EPHA4 WNT5B UNC5B SERPINF1 DAPK3 UNC5C PRKCA MAPK8IP3 TEP1 PARD3 ULK2 ROR1 ULK1 ROR2 EPHA2 RTN4R DLX1 NOTCH3 DLX2 NUMBL RTN1 BRI3 SDC2 STXBP1 TWIST1 EFNA5 RTN4 EFNB3 MYO6 PSAP APOE WNT3 PLXNA3 TGFB2 FZD2 FZD5 FZD7 LIF FZD8 L1CAM PBX1 DCLK1 EFNA1 NR4A2 GNAQ PLXNB2 ID3 PLXNB1 FGFR1 CDKN1C ROBO2 NRP1 NRP2 LDB1 SIX1 ADM LAMC1 PTPRG GLI2 SIX4 NCS1 TIMP2 …	0	0
UP in EWS	30247	polysaccharide binding	0.00012484	16	437	0.036	SERPINE2 COL25A1 FSTL1 THBS1 DCN ADAMTS3 GPNMB LIPH COL5A3 RSPO2 RSPO3 PTX3 CCN2 CCN1 HBEGF TLR2	0	0	UP in siEF	23060	signal transmission	3.1567e-07	240	1392	0.172	OXTR CBLB EPS8 GPR173 GPR176 EDNRA ALCAM RPS6KA2 FBXO6 CCN1 IL15RA EPHA4 UNC5B PRKCD UNC5C BHLHA15 MAPK8IP2 ANK1 MAPK8IP1 EREG SIGIRR BCAM PRKAR1B RRAGC RRAGB SPARCL1 ULK2 RIN3 ULK1 RIN2 OPTN EPHA3 SKAP2 PTGES CRABP2 EPAS1 CRABP1 MICAL1 MYO6 PENK HMOX1 KCNMB4 APOE RALGDS S100A11 NTSR1 S100A10 TNFSF18 ABCA1 CDK18 JUN FZD2 FZD5 GADD45B ABCA4 EIF2AK3 RASSF7 RAB27A GRIN2C COL1A2 PCDHB2 PTK7 PPP1R1C T…	0	0	DN in EWS								0	0	DN in siEF	5813	centrosome	5.7824e-08	29	873	0.033	CCNF BRCA2 KIF15 AURKA CDC20 CDC45 DLGAP5 CEP55 LRRCC1 PLK4 PLK1 USP2 FANCB CKAP5 FLI1 MZT1 SGO1 ESPL1 CENPJ TCP1 SASS6 TACC3 MCM3 BIRC5 TUBGCP3 TUBGCP4 KIF20B CALM1 DTL	0	0	UP in siEF&EEF	23046	signaling process	2.2339e-07	296	1778	0.166	OXTR CBLB ABAT EPS8 GPR176 EDNRA ALCAM RPS6KA5 RASSF2 RPS6KA2 NAMPT CCN1 KIFAP3 PDK2 PDK1 IL15RA EPHA4 UNC5B PRKCD DAPK3 UNC5C PRKCA ANK3 MAPK8IP2 FRS3 MAPK8IP3 ANK1 MAPK8IP1 SIGIRR TIAM2 BCAM PRKAR1B RRAGC PRKAR1A RRAGB ULK2 RIN3 ULK1 RIN2 OPTN STX1A EPHA3 SKAP2 EPHA2 NUMBL CRABP2 EPAS1 PEX11B AGAP2 TXN PRKAR2B MICAL1 MYO6 HMOX1 KCNMB4 APOE RALGDS S100A11 S100A10 ABCA1 WWTR1 CDK18 JUN FZD2 DMPK …	0	0
UP in EWS	32355	response to estradiol stimulus	0.00012967	10	437	0.022	PDGFRA SOCS1 DUSP1 IL1B PDGFB TXNIP PDGFA CCN2 PTGS2 CCN1	0	0	UP in siEF	9725	response to hormone stimulus	3.4104e-07	71	1392	0.051	PCSK1 PTPRU SLC27A1 OXTR BTG1 PTPRO SERPINE1 FHL2 PLOD3 PLAT ADM AQP1 LEPR CCN2 CCN1 IL6R RGS9 CTSB PDGFRA ANXA3 GPX3 SPHK1 IGFBP2 NGF F3 PGF TGFBR1 EREG TGFBR3 MMP14 GAL LOX PRKAR1B VGF TXNIP PPARA MFGE8 CRYAB RHOQ ABCG1 FOXC2 PDGFB PDGFA PIK3R3 LCAT PLD1 PTGS2 THBS1 ADCY6 FOXO1 SOCS3 SOCS1 GNG4 ERBB2 SPP1 HMOX1 CCL2 IGFBP7 A2M TAC1 TGFB2 MAPK15 ASS1 FOSL1 COL1A1 FABP3 MGP SDC1 ALPL CD24 BCAR1	0	0	DN in EWS								0	0	DN in siEF	6297	nucleotide-excision repair, DNA gap filling	6.5195e-08	10	873	0.011	POLD3 RFC5 RFC3 PCNA RFC4 LIG1 RFC2 POLD1 POLE2 POLE	0	0	UP in siEF&EEF	23060	signal transmission	2.2339e-07	296	1778	0.166	OXTR CBLB ABAT EPS8 GPR176 EDNRA ALCAM RPS6KA5 RASSF2 RPS6KA2 NAMPT CCN1 KIFAP3 PDK2 PDK1 IL15RA EPHA4 UNC5B PRKCD DAPK3 UNC5C PRKCA ANK3 MAPK8IP2 FRS3 MAPK8IP3 ANK1 MAPK8IP1 SIGIRR TIAM2 BCAM PRKAR1B RRAGC PRKAR1A RRAGB ULK2 RIN3 ULK1 RIN2 OPTN STX1A EPHA3 SKAP2 EPHA2 NUMBL CRABP2 EPAS1 PEX11B AGAP2 TXN PRKAR2B MICAL1 MYO6 HMOX1 KCNMB4 APOE RALGDS S100A11 S100A10 ABCA1 WWTR1 CDK18 JUN FZD2 DMPK …	0	0
UP in EWS	30199	collagen fibril organization	0.0001324	7	437	0.016	COL1A1 FOXC2 TGFB2 ADAMTS3 COL11A1 COL5A3 COL12A1	0	0	UP in siEF	51674	localization of cell	3.4104e-07	56	1392	0.04	NRP1 BTG1 CXCL8 SIX1 PLAT ETS1 LYST ICAM1 CXCL16 CDH2 NCK2 CCN2 IL6R PDGFRB ITGA4 S100A2 TNFRSF12A SHROOM2 ARID5B TGFBR1 TGFBR3 MMP14 VCAN CEACAM1 CDH13 ITGA6 ULK1 AJUBA SCG2 CD44 LAMA5 FOXC1 SEMA3C PDGFB SEMA3F THBS1 SGPL1 PODXL CCL2 FYN CTHRC1 TGFB2 JUP LAMB2 FN1 VEGFC DCLK1 NR4A2 COL5A1 GIPC1 ITGA11 JMY PLXNB1 CD24 MDGA1 BCAR1	0	0	DN in EWS								0	0	DN in siEF	6289	nucleotide-excision repair	8.415e-08	17	873	0.019	RFC5 DCLRE1A RFC3 PCNA RFC4 LIG1 RFC2 RAD23A FANCC FANCB BRCA2 POLD3 NEIL3 SLX4 POLD1 POLE2 POLE	0	0	UP in siEF&EEF	51128	regulation of cellular component organization	2.394e-07	98	1778	0.055	OXTR AVIL AHR CLU AMOT SCAMP5 CDH2 PALM NRCAM TMSB10 PDK1 TPM1 PRKCA ACTN4 MID1 TEP1 BIN1 ULK1 RTN4R NUMBL RAB5B CUL7 SDC4 FBLIM1 BRI3 STXBP1 PDGFA CORO1A RTN4 PODXL APOE PLXNA3 WWTR1 TGFB2 SMAD3 NEK6 FN1 SMAD7 EFNA1 CYLD COL5A1 PLXNB2 PLXNB1 TPP1 NF2 ROBO2 NRP1 CLIC4 TGFB1I1 STON1 STON2 TRIOBP PTPRG CAPZB TMSB4X NCS1 NCK2 NEFL NEFM JARID2 APC2 TNFRSF12A ANXA2 METRN SPHK1 ITGA2 SHROOM3 TGFBR1 MMP…	0	0
UP in EWS	50896	response to stimulus	0.00013766	129	437	0.295	ERRFI1 IFITM2 SERPINE1 F11R ETS1 ICAM1 AMOT EPS8 CCN2 CCN1 EPHA4 PDGFRA MR1 MID1 GEM DDIT3 DDIT4 TXNIP SERPING1 TRIB3 TRIB1 ABCG1 CDS1 CD274 NDRG4 EPAS1 EBI3 PDGFB ITPR1 PDGFA IL20RB LY96 BCL10 FOXO3 NDRG1 SOCS1 NUAK2 IRAK2 STC2 HMOX1 A2M TAC1 DRD4 JUN TGFB2 VCAM1 GADD45B GADD45A LIF COL1A1 NR4A2 BST1 MAFF BCL3 BHLHE40 JMY CYP1A1 TPP1 CD24 ULBP1 HRK NRP1 BTG1 FLT1 CXCL8 FHL1 ADM VLDLR SOBP TNFSF1…	0	0	UP in siEF	48870	cell motility	3.4104e-07	56	1392	0.04	NRP1 BTG1 CXCL8 SIX1 PLAT ETS1 LYST ICAM1 CXCL16 CDH2 NCK2 CCN2 IL6R PDGFRB ITGA4 S100A2 TNFRSF12A SHROOM2 ARID5B TGFBR1 TGFBR3 MMP14 VCAN CEACAM1 CDH13 ITGA6 ULK1 AJUBA SCG2 CD44 LAMA5 FOXC1 SEMA3C PDGFB SEMA3F THBS1 SGPL1 PODXL CCL2 FYN CTHRC1 TGFB2 JUP LAMB2 FN1 VEGFC DCLK1 NR4A2 COL5A1 GIPC1 ITGA11 JMY PLXNB1 CD24 MDGA1 BCAR1	0	0	DN in EWS								0	0	DN in siEF	16462	pyrophosphatase activity	8.7445e-08	74	873	0.084	TOP2A HBS1L ERCC6L MCM7 NUDT1 KIF14 DNHD1 KIF11 TTF2 CHTF18 ABCA13 KIF15 TUBA1B GNGT2 KIF1C ENPP1 KIF1A RFC5 HELLS SHPRH RFC3 RFC4 RFC2 DDX11 MYH15 ATP11C KIF24 DDX54 KIF23 KIF22 SMC1A KATNAL1 KIFC1 MCM3 MCM4 KIF2C MCM6 DNA2 KIF20B MCM2 PIF1 BLM SRCAP DDX21 MTIF2 ATP1A1 HSPD1 GNA14 BRIP1 KLC2 DHX33 ORC1 FIGNL1 HLTF DHX37 MFN2 RAD54L LONRF1 MDN1 DYNC1I1 ABCF1 HSPA8 DNAH10 ABCA5 ATAD5 MYO10 FANCM X…	0	0	UP in siEF&EEF	12501	programmed cell death	2.6218e-07	103	1778	0.057	TRIO TRAF3IP2 CIB1 AHR CLU PHLDA2 MAP3K5 IER3 PHLDA3 SH3GLB1 MEF2C UNC5B DAPK3 F2R SHISA5 UNC5C TIAM2 ERN1 RRAGC DDIT4 SPIN2B SQSTM1 EPHA2 BEX3 TWIST1 BCL10 FOXO3 RTN4 SGPL1 BCL2L11 APH1B PSAP PMAIP1 BMF FIS1 JUN SMAD3 GADD45B GADD45A NEK6 EIF2AK3 TNFRSF10D GULP1 ID1 ITM2B BCL2L1 SH3KBP1 RASGRF2 TRADD ECE1 SHB LITAF BBC3 GLI2 ING4 AKAP13 PPP3CC AIFM2 PPP1R13L CASP3 MCF2L BCL7C TSPO KLF11 TNFRSF12…	0	0
UP in EWS	8201	heparin binding	0.00014503	13	437	0.029	SERPINE2 COL25A1 FSTL1 THBS1 ADAMTS3 GPNMB LIPH COL5A3 RSPO2 RSPO3 CCN2 CCN1 HBEGF	0	0	UP in siEF	9987	cellular process	3.4104e-07	836	1392	0.6	AVIL F11R SCAMP5 ISLR TDO2 TMEM8B MEF2C CXADR UNC5B UNC5C BHLHA15 HSPG2 CH25H MYL6 CLDN4 PRKAR1B ASPHD1 DDIT3 DDIT4 RBP1 TXNIP ASPHD2 ATF3 OPTN SKAP2 MTMR3 CRABP2 PDGFB PDGFA SLC5A3 EPB41L1 RDH10 MYO6 KCNMB4 ABCA1 JUN CADM4 JUP FUCA1 ABCA4 EIF2AK3 FN1 PBX4 L1CAM GRIN2C COL1A1 ABTB1 PPFIBP1 COL1A2 AGO4 SFXN3 FAT3 FXYD5 HRK SRPX PIGZ SHB LITAF TRIOBP BBC3 JPH2 TSPO PCMTD1 APC2 DUSP2 METRN SPHK1 MYO…	0	0	DN in EWS								0	0	DN in siEF	5815	microtubule organizing center	1.0233e-07	39	873	0.044	CCNF BUB1B BRCA1 BRCA2 KIF15 AURKA CDC20 CCNB1 CDC45 BUB1 DLGAP5 CCT5 CEP55 LRRCC1 PLK4 CEP152 PLK1 USP2 HAUS4 HAUS6 FANCB CKAP5 FLI1 MZT1 SGO1 KIF18A ESPL1 KIFC1 CENPJ TCP1 SASS6 TACC3 MCM3 BIRC5 TUBGCP3 TUBGCP4 KIF20B CALM1 DTL	0	0	UP in siEF&EEF	30198	extracellular matrix organization	2.911e-07	32	1778	0.017	COL18A1 FOXC1 TNXB B4GALT1 COL11A2 LAMC1 NID1 CST3 LGALS3 ADAMTS3 SERPINH1 EMILIN1 CCN1 TGFB2 ANXA2 LAMB2 KAZALD1 TGFBR1 NFKB2 COL1A1 CCDC80 COL2A1 P4HA1 LOX COL5A1 COL4A2 COL6A2 PXDN BCL3 COL5A2 VWA1 RECK	0	0
UP in EWS	51674	localization of cell	0.00014503	23	437	0.052	NRP1 TGFB2 BTG1 VCAM1 CXCL8 DNAH17 TNFRSF12A ITGA1 PDGFB VEGFC ETS1 THBS1 ICAM1 AMOT NR4A2 SDCBP IL1B JMY CDH13 FYN CCN2 CD24 CTHRC1	0	0	UP in siEF	1558	regulation of cell growth	4.1663e-07	43	1392	0.03	NRP1 CAMK2D BTG1 SEMA3A HTRA1 LTBP4 SEMA3F CXCL16 TRO DNAJB2 IGFBPL1 GNG4 SPP1 CCN3 IGFBP7 APOE CCN2 IGFBP6 CCN1 PLXNA3 APC2 TGFB2 SMAD3 TNFRSF12A IGFBP5 IGFBP4 SPHK1 IGFBP3 IGFBP2 OSGIN1 CRIM1 ISLR2 NGF TGFBR1 DCBLD2 GREM1 DAB2 CDH13 ULK1 CRYAB BCAR1 CD44 HBEGF	0	0	DN in EWS								0	0	DN in siEF	16818	hydrolase activity, acting on acid anhydrides, in phosphorus-containing anhydrides	1.0258e-07	74	873	0.084	TOP2A HBS1L ERCC6L MCM7 NUDT1 KIF14 DNHD1 KIF11 TTF2 CHTF18 ABCA13 KIF15 TUBA1B GNGT2 KIF1C ENPP1 KIF1A RFC5 HELLS SHPRH RFC3 RFC4 RFC2 DDX11 MYH15 ATP11C KIF24 DDX54 KIF23 KIF22 SMC1A KATNAL1 KIFC1 MCM3 MCM4 KIF2C MCM6 DNA2 KIF20B MCM2 PIF1 BLM SRCAP DDX21 MTIF2 ATP1A1 HSPD1 GNA14 BRIP1 KLC2 DHX33 ORC1 FIGNL1 HLTF DHX37 MFN2 RAD54L LONRF1 MDN1 DYNC1I1 ABCF1 HSPA8 DNAH10 ABCA5 ATAD5 MYO10 FANCM X…	0	0	UP in siEF&EEF	7166	cell surface receptor linked signaling pathway	2.9729e-07	192	1778	0.107	OXTR TRIO DGKA PLAT CBLB CELSR1 CELSR3 IL27RA EPS8 GPR176 EDNRA RPS6KA5 BSG ADORA1 LEPR HOMER3 IL6R RGS9 SOX4 TGM2 IL13RA1 CDON CAST TLE4 ACVR1 EPHA4 WNT5B APLP2 F2R ADAM10 ARID5B MAPK8IP2 FRS3 GEM ADAM17 TEP1 PARD3 TXNIP ROR1 ROR2 MAML3 EPHA3 EPHA2 CFD NOTCH3 PTGFR NUMBL NXPH4 PDGFA PIK3R3 KLHL12 BCL10 FOXO4 LTBP3 FOXO1 SLC9A3R1 FUT8 SGPL1 PCSK1N EFNB3 APH1B IRAK2 STC2 PDGFC APOE WNT3 ABCA1 JUN …	0	0
UP in EWS	48870	cell motility	0.00014503	23	437	0.052	NRP1 TGFB2 BTG1 VCAM1 CXCL8 DNAH17 TNFRSF12A ITGA1 PDGFB VEGFC ETS1 THBS1 ICAM1 AMOT NR4A2 SDCBP IL1B JMY CDH13 FYN CCN2 CD24 CTHRC1	0	0	UP in siEF	40008	regulation of growth	4.7078e-07	61	1392	0.043	NRP1 BTG1 CSF1 BBC3 CXCL16 TRO ING4 CCN3 CCN2 CCN1 TMEM8B APC2 CXADR TNFRSF12A IGFBP5 IGFBP4 SPHK1 IGFBP3 IGFBP2 ISLR2 NGF TGFBR1 GREM1 VGF CDH13 KCTD11 ULK1 CRYAB SCG2 CD44 HBEGF FOXC2 FOXC1 CAMK2D SEMA3A HTRA1 LTBP4 NEDD9 SEMA3F DNAJB2 SOCS3 SGPL1 PCSK1N SOCS1 BCL2L11 IGFBPL1 GNG4 SPP1 IGFBP7 APOE IGFBP6 PLXNA3 TGFB2 SMAD3 OSGIN1 CRIM1 HMGA2 DCBLD2 DAB2 BCAR1 LRP12	0	0	DN in EWS								0	0	DN in siEF	7346	regulation of mitotic cell cycle	1.1103e-07	30	873	0.034	RB1 BUB1B PKMYT1 BRCA2 CCNB1 CCND1 RCC1 KNTC1 FBXO5 GTSE1 BUB1 DLGAP5 CDT1 GABBR1 BORA EGF PLK1 USP2 IGF1 FANCB ZWINT TICRR CENPE ANLN TPX2 CENPF ESPL1 BIRC5 KIF20B MAD2L1	0	0	UP in siEF&EEF	7165	signal transduction	2.9883e-07	263	1778	0.147	OXTR CBLB EPS8 EDNRA ALCAM RPS6KA5 RASSF2 RPS6KA2 NAMPT CCN1 KIFAP3 PDK2 PDK1 IL15RA EPHA4 UNC5B PRKCD DAPK3 UNC5C PRKCA ANK3 MAPK8IP2 FRS3 MAPK8IP3 ANK1 MAPK8IP1 SIGIRR TIAM2 BCAM PRKAR1B RRAGC PRKAR1A RRAGB ULK2 RIN3 ULK1 RIN2 OPTN EPHA3 SKAP2 EPHA2 NUMBL CRABP2 EPAS1 PEX11B AGAP2 TXN PRKAR2B MICAL1 HMOX1 APOE RALGDS S100A11 S100A10 ABCA1 WWTR1 CDK18 JUN FZD2 FZD5 GADD45B EIF2AK3 RASSF7 RAB27A …	0	0
UP in EWS	6917	induction of apoptosis	0.00015125	23	437	0.052	HRK CDS1 NRP1 TNFRSF9 CEBPG BCL10 FOXO3 NGF RUNX3 ETS1 THBS1 BBC3 APH1B BCL3 JMY ARHGEF3 CASP1 HMOX1 CD24 PRODH PHLDA1 BOK TLR2	0	0	UP in siEF	7165	signal transduction	5.6125e-07	213	1392	0.153	OXTR CBLB EPS8 GPR173 EDNRA ALCAM RPS6KA2 FBXO6 CCN1 IL15RA EPHA4 UNC5B PRKCD UNC5C BHLHA15 MAPK8IP2 ANK1 MAPK8IP1 EREG SIGIRR BCAM PRKAR1B RRAGC RRAGB SPARCL1 ULK2 RIN3 ULK1 RIN2 OPTN EPHA3 SKAP2 PTGES CRABP2 EPAS1 CRABP1 MICAL1 PENK HMOX1 APOE RALGDS S100A11 S100A10 TNFSF18 ABCA1 CDK18 JUN FZD2 FZD5 GADD45B ABCA4 EIF2AK3 RASSF7 RAB27A COL1A2 PTK7 PPP1R1C TNFSF4 PDE3A NRP1 ADM SHB AKAP12 ANKRD1 …	0	0	DN in EWS								0	0	DN in siEF	16817	hydrolase activity, acting on acid anhydrides	1.2767e-07	74	873	0.084	TOP2A HBS1L ERCC6L MCM7 NUDT1 KIF14 DNHD1 KIF11 TTF2 CHTF18 ABCA13 KIF15 TUBA1B GNGT2 KIF1C ENPP1 KIF1A RFC5 HELLS SHPRH RFC3 RFC4 RFC2 DDX11 MYH15 ATP11C KIF24 DDX54 KIF23 KIF22 SMC1A KATNAL1 KIFC1 MCM3 MCM4 KIF2C MCM6 DNA2 KIF20B MCM2 PIF1 BLM SRCAP DDX21 MTIF2 ATP1A1 HSPD1 GNA14 BRIP1 KLC2 DHX33 ORC1 FIGNL1 HLTF DHX37 MFN2 RAD54L LONRF1 MDN1 DYNC1I1 ABCF1 HSPA8 DNAH10 ABCA5 ATAD5 MYO10 FANCM X…	0	0	UP in siEF&EEF	902	cell morphogenesis	3.0205e-07	66	1778	0.037	ROBO2 NRP1 COL18A1 NRP2 CBY1 ADM LAMC1 CLU CELSR3 GLI2 ALCAM KIF5C NEFL NRCAM SOX9 SOX6 EPHA4 UNC5B STRADB ITGA1 MST1 SHROOM3 UNC5C PRKCA MAPK8IP3 TGFBR3 VCAN RTN4RL1 PARD3 MYH9 ULK2 B3GNT2 ULK1 CHST3 GAS7 RTN4R LAMA5 NOTCH3 NUMBL SDC2 STXBP1 SEMA3A SEMA3B EFNA5 EFNB3 TMEM67 PDPN ERBB2 DMD APOE MSX1 WNT3 PLXNA3 BBS2 WWTR1 TGFB2 LAMB2 FN1 LAMB1 L1CAM DCLK1 NR4A2 KLF7 RIT1 TTLL3 ID1	0	0
UP in EWS	42108	positive regulation of cytokine biosynthetic process	0.00015171	9	437	0.02	IL1B IRF1 BCL3 CEBPG EBI3 HMOX1 BCL10 THBS1 TLR3	0	0	UP in siEF	42060	wound healing	5.6247e-07	41	1392	0.029	NOTCH3 SDC2 PROS1 SERPINE1 PDGFB PDGFA PLAT TFPI EFEMP2 PLAU ERBB2 HMOX1 CD59 IL11 PDGFRA TGFB2 GSN SMAD3 FZD7 MST1 TPM1 MYOF F2R PLAUR RAB27A F3 SYT7 DCBLD2 EREG COL3A1 KLF6 LOX COL5A1 NINJ1 SDC1 CD9 SERPING1 PPARA AJUBA F2RL2 CD44	0	0	DN in EWS								0	0	DN in siEF	7051	spindle organization	3.7433e-07	15	873	0.017	SPAG5 HAUS4 BUB1B KIF23 HAUS6 KIF11 SMC1A CKAP5 ZWINT AURKA ESPL1 TACC3 RCC1 FBXO5 SPC25	0	0	UP in siEF&EEF	48729	tissue morphogenesis	3.0205e-07	60	1778	0.033	NRP1 ERRFI1 RARG BMPR2 CSF1 TGFB1I1 CTSZ TNC SIX1 ADM CELSR1 GLI2 EDNRA SOX9 NKX3-1 TGM2 ACVR1 LMO4 ITGA2 GAA TPM1 SHROOM3 PGF RGMA TGFBR2 TGFBR3 PRKAR1A HOXB4 HOXB2 FREM2 VCL EPHA2 LAMA5 NOTCH3 FOXC1 SEMA3C SEMA3A TWIST1 BCL10 PODXL RDH10 PLXNA1 WNT3 TFAP2A TCF7L1 TGFB2 SMAD3 EYA1 FZD6 VEGFC KLF4 PBX1 VEGFA SMAD7 COL1A1 EXT2 DLC1 SNAI1 NF2 FGFR1	0	0
UP in EWS	5539	glycosaminoglycan binding	0.00015433	15	437	0.034	SERPINE2 COL25A1 FSTL1 THBS1 DCN ADAMTS3 GPNMB LIPH COL5A3 RSPO2 RSPO3 CCN2 CCN1 HBEGF TLR2	0	0	UP in siEF	48008	platelet-derived growth factor receptor signaling pathway	8.0874e-07	11	1392	0.007	PDGFRB MYO1E PDGFRA SGPL1 PDGFC PDGFB TXNIP PDGFA ARID5B PLAT BCAR1	0	0	DN in EWS								0	0	DN in siEF	44238	primary metabolic process	4.0987e-07	336	873	0.384	SLC23A2 PGLYRP2 POP1 CCNF NUDT1 RAX ENO2 ALKBH8 CDC20 LIPE PNP LIPI CHEK2 PSMD3 EPC1 EARS2 EPHA5 EPHA7 ST6GAL1 TIPIN ALG6 DAPK1 PRKCB DDX11 ESCO2 HASPIN PASK PHKA2 ASRGL1 WDR77 UHMK1 ARC NEIL3 MTHFD1 PADI2 PRKD1 DNA2 TTLL12 ENPEP PRKDC PDE1B ARX PIK3R1 RPAP1 KALRN CYB5R2 C5 BRIP1 TERT FIGNL1 HLTF ST8SIA5 NAALAD2 NAA50 PLK4 NGFR TRAP1 CDT1 PRPF38A BCL11B SIAH3 XRCC2 PLK1 EAF2 NFATC3 NR0B1 IGF1 PA2…	0	0	UP in siEF&EEF	51179	localization	3.2779e-07	388	1778	0.218	SCAMP5 GJA3 AP1S2 HOMER3 UNC13A RFX3 PRKCA MYL6 TEP1 BIN1 PARD3 TXNIP OPTN CFD TTYH3 AGAP2 SLC5A3 CHST11 MYO6 S100A13 HMOX1 KCNMB4 ABCA1 JUN JUP ABCA3 FN1 EIF2AK3 GRIN2C GRIN2D EHD1 COL1A1 EHD2 GIPC1 SFXN3 FXYD5 ARF4 BTG1 DENND1A STON1 STON2 LYST ASGR1 OSBPL10 MRC2 TMSB4X PEA15 NEFL TSPO NEFM APC2 KCND1 SSR4 ANXA2 SLC2A11 ANXA3 SSR2 SLC39A13 MMP14 SLCO4A1 PLIN3 PLIN2 PPARA ARF5 SLC29A3 PCYOX1 TAM…	0	0
UP in EWS	12502	induction of programmed cell death	0.00015433	23	437	0.052	HRK CDS1 NRP1 TNFRSF9 CEBPG BCL10 FOXO3 NGF RUNX3 ETS1 THBS1 BBC3 APH1B BCL3 JMY ARHGEF3 CASP1 HMOX1 CD24 PRODH PHLDA1 BOK TLR2	0	0	UP in siEF	70161	anchoring junction	9.9963e-07	34	1392	0.024	SYNM OXTR ITGB5 SDC4 FBLIM1 TGFB1I1 FHL2 NTN4 NEXN NEDD9 PPL LPP TGM1 PDLIM2 CDH2 NPHP1 PDLIM7 TNS2 CXADR JUP ACTN1 SHROOM2 PARVA LMO7 PARVB WTIP AIF1L ADAM15 ZYX SDC1 ITGA6 AJUBA LIMS2 BCAR1	0	0	DN in EWS								0	0	DN in siEF	3677	DNA binding	4.3628e-07	173	873	0.198	RB1 ERCC6L DSCC1 RAX HJURP TTF2 IKZF2 SOX2 HMGN5 SALL1 SOX1 SALL2 PTTG1 EME1 MYB ARID2 TP63 WDHD1 ZNF560 LIG1 DDX11 ZBTB37 RFX2 LIG3 ESCO2 HASPIN POU3F1 ISL1 POU3F2 NEIL3 ZNF718 DNA2 PIF1 KMT2D ZNF792 BLM DNMT1 SRCAP DLX5 PRKDC ARX MACROH2A2 RPAP1 RAD51AP1 BRIP1 TERT ORC1 ZMAT4 HLTF ALX4 OTX2 CLSPN HMGXB3 NKX6-1 ZNF300 NKX2-2 ESRRA CDT1 EGR2 FANCM ZBTB16 XRCC2 EAF2 NFATC3 NR0B1 PA2G4 FANCB FLI1 F…	0	0	UP in siEF&EEF	8150	biological_process	3.5614e-07	1518	1778	0.853	CHIC2 ZNF296 AVIL ALKBH7 F11R SCAMP5 DPYSL4 MLYCD TMEM8B ZNF287 MEF2C CXADR UNC5B RFX3 UNC5C FRS3 HSPG2 SIGIRR MYL5 MYL6 PRKAR1B ASPHD1 PRKAR1A DDIT3 DDIT4 RBP1 TXNIP ASPHD2 OPTN ATF3 SKAP2 EXD2 ZBTB8A NLRX1 TTYH3 MTMR3 COL13A1 CRABP2 FLII SHOX2 AGAP2 PDGFA PLA2G6 SLC5A3 ADAMTS10 DYNC2LI1 ADAMTS15 EPB41L1 PRKAR2B RDH10 RNF217 PDGFC MYO6 KCNMB4 GTF2IRD2B ABCA1 JUN CADM4 JUP FUCA1 ABCA3 FUCA2 EDEM2…	0	0
UP in EWS	5102	receptor binding	0.00016372	46	437	0.105	CALCB CXCL8 SERPINE2 LAMA4 EBI3 PDGFB PDGFA ADM AKAP6 NTS THBS1 FBLN5 TNFSF13B ICAM1 ARNTL SDCBP SOCS1 GPNMB PDGFD STC2 TIMP2 KDR CCN2 FAM3C TAC1 CHGB S100A10 PDGFRA TGFB2 ANGPT2 VCAM1 TSLP CCL20 GDF15 ITGA1 LIF VEGFC NGF DKK1 INHBE GREM1 VGF ADM2 IL1B F2RL1 HBEGF	0	0	UP in siEF	40011	locomotion	1.3816e-06	69	1392	0.049	NRP1 BTG1 CXCL8 CD81 SIX1 PLAT ETS1 LYST CXCL14 ICAM1 CXCL16 CDH2 PLAU NCK2 CCN2 CCN1 IL6R CMKLR1 PDGFRB ITGA4 S100A2 TNFRSF12A SHROOM2 PLAUR ARID5B TGFBR1 TGFBR3 MMP14 VCAN CEACAM1 CDH13 ITGA6 ULK1 DOCK2 AJUBA SCG2 CD44 LAMA5 FOXC1 SEMA3C PDGFB PDGFA SEMA3F PLD1 THBS1 SGPL1 PODXL CCL2 FYN PLXNA3 CTHRC1 TGFB2 JUP CMTM3 LAMB2 FN1 VEGFC GRIN2C DCLK1 FOSL1 NR4A2 COL5A1 GIPC1 ITGA11 JMY PLXNB1 CD24 M…	0	0	DN in EWS								0	0	DN in siEF	8283	cell proliferation	4.4394e-07	51	873	0.058	MCM7 CSE1L BUB1B ADRA1D BRCA2 MKI67 KIF15 CCND3 CCND1 BMPER DLGAP5 TP63 TCF19 HELLS SYK CHUK POU3F2 CDC25A ASPM RP1 DKC1 KIF2C PRKD1 ZMYND11 DTL MCM2 ENPEP PCNA DLX5 ARX HSPD1 CD79A RACGAP1 ERBB4 E2F1 GINS1 STIL BRF2 PLK1 CCK IGF1 PA2G4 FANCB POLA1 TPX2 CENPF NASP ARTN IMPDH1 ID2 TACC3	0	0	UP in siEF&EEF	6915	apoptosis	3.8236e-07	101	1778	0.056	TRIO TRAF3IP2 CIB1 AHR CLU PHLDA2 MAP3K5 IER3 PHLDA3 SH3GLB1 MEF2C UNC5B DAPK3 F2R SHISA5 UNC5C TIAM2 ERN1 RRAGC DDIT4 SPIN2B SQSTM1 EPHA2 BEX3 TWIST1 BCL10 FOXO3 RTN4 SGPL1 BCL2L11 APH1B PSAP PMAIP1 BMF FIS1 JUN SMAD3 GADD45B GADD45A NEK6 EIF2AK3 TNFRSF10D GULP1 ID1 ITM2B BCL2L1 SH3KBP1 RASGRF2 TRADD ECE1 SHB LITAF BBC3 GLI2 ING4 AKAP13 PPP3CC AIFM2 PPP1R13L CASP3 MCF2L BCL7C TSPO KLF11 TNFRSF12…	0	0
UP in EWS	8219	cell death	0.00016372	38	437	0.086	PPP1R15A CSRNP1 ITPR1 TNFAIP3 BCL10 FOXO3 THBS1 BBC3 CECR2 DRAM1 APH1B CASP1 HMOX1 APOL1 PHLDA1 IER3 BOK JUN TGFB2 GADD45B TNFRSF12A GADD45A TNFRSF18 NGF FOSL2 RHOB GULP1 GREM1 RNF144B RYBP IL1B DDIT4 ARHGEF3 TPP1 PTPN6 TRIB3 PDCD1 MET	0	0	UP in siEF	8285	negative regulation of cell proliferation	1.4526e-06	62	1392	0.044	COL18A1 PTPRU IFITM1 BTG1 CXCL8 TGFB1I1 PTPRO CBLB ADM ETS1 ING4 ADORA1 TIMP2 NCK2 SPEG TNS2 NKX3-1 KLF11 CXADR IGFBP5 IGFBP3 F2R P3H1 VASH1 PDCD1LG2 SSTR2 EREG TGFBR3 GAL ZEB1 ASPH ADORA2B CDH13 ROR2 SCG2 SKAP2 PTGES CD274 PTGS2 THBS1 TOB1 DNAJB2 GPNMB ERBB2 HMOX1 TNFRSF14 IGFBP7 APOE IGFBP6 S100A11 JUN TGFB2 SMAD3 LIF KLF4 FOSL1 FABP3 CDK6 PMP22 SPRY2 SPRY1 MXD4	0	0	DN in EWS								0	0	DN in siEF	34645	cellular macromolecule biosynthetic process	4.734e-07	93	873	0.106	TOP2A HBS1L FEN1 MCM7 DSCC1 MCM10 GXYLT2 TTF2 FOXM1 BRCA2 CHTF18 CHAF1B CHAF1A PTTG1 POFUT1 EPC1 TK1 POLE EARS2 CHST8 RFC5 ST6GAL1 POU1F1 RFC3 TIPIN RFC4 ALG6 LIG1 RFC2 DARS2 LIG3 PAX5 CDC25A DBF4 SARS2 DKC1 MCM3 MCM4 NAF1 MCM5 MCM6 DNA2 DTL MCM2 BLM PCNA HLF PRIM1 PTGER3 HOXD13 PHB LIN9 RPAP1 TYMS POLD3 BRIP1 CDC45 PDF TERT ORC1 FUT9 TGS1 POLD1 HLTF E2F2 ST8SIA5 E2F3 CLSPN TAF9B VARS1 ABCF1 GINS…	0	0	UP in siEF&EEF	44425	membrane part	4.3336e-07	722	1778	0.406	PATJ TES SERPINE2 F11R FGFRL1 EPS8 NYNRIN SCAMP5 COMTD1 GPR176 CNST ALCAM GJA3 CREB3L4 CREB3L1 CREB3L2 AP1S2 CYP1B1 HOMER3 TMEM8B IER3 CXADR UNC13A UNC5B FNDC3B UNC5C PRKCA SIGIRR BCAM ASPHD1 PARD3 GPR161 ORAI2 ASPHD2 FREM2 RNF122 CFD TTYH3 COL13A1 FICD TPRG1L BCL10 SLC5A3 CHST11 RNF215 EPB41L1 PRKAR2B RDH10 RNF217 MYO6 ST3GAL4 ST3GAL5 HMOX1 KCNMB4 ST3GAL6 CHST14 ST3GAL1 LRRC37A3 ABCA1 PRRT3 CADM…	0	0
UP in EWS	5515	protein binding	0.00016372	246	437	0.562	ERRFI1 IFITM2 SERPINE2 MAML2 SERPINE1 BACH2 ICAM1 EPS8 ISLR LIPH KDR SOX8 CCN2 CCN1 CCNL1 IER3 CHGB EPHA4 CXADR WSB1 OMD ISLR2 DKK1 RUNX3 HOXB9 RNF125 DAAM1 PPP1R3C DDIT3 HECW2 TXNIP SERPING1 TRIB3 TRIB1 ATF3 RNF122 CDS1 SDC4 EPAS1 HHLA3 EBI3 PDGFB PDGFA BCL10 NEU4 APH1B RAB11FIP1 PDGFD STC2 HMOX1 MAP6 A2M S100A10 JUN TSLP GADD45B GADD45A FZD6 LIF CGN FHDC1 VASN FOSL2 COL1A1 GNPTG PPFIBP1 CYP1A1 …	0	0	UP in siEF	50896	response to stimulus	1.7002e-06	366	1392	0.262	IFITM3 ERRFI1 SPON2 IFITM1 OXTR IFITM2 AVIL SERPINE1 CBLB F11R GRPR ICAM1 IL27RA AQP1 EPS8 SCAMP5 EDNRA CREB3L1 DHX58 CREB3L2 CYP1B1 FBXO6 CCN2 CCN1 CMKLR1 EPHA4 CUBN RSAD2 PRKCD HLA-B HLA-C HLA-A MAPK8IP1 EREG SIGIRR PRKAR1B DDIT3 DDIT4 NINJ1 TXNIP SERPING1 NEIL1 HOXB8 EPHA3 CFD NLRX1 SLC22A5 LXN EPAS1 SDC2 EBI3 PDGFB PDGFA PIK3R3 BCL10 NUAK2 S100A16 STC2 MYO6 PENK S100A13 HMOX1 KCNMB4 APOE KCNN…	0	0	DN in EWS								0	0	DN in siEF	6270	DNA-dependent DNA replication initiation	6.9061e-07	9	873	0.01	POLA1 CDC45 ORC1 MCM7 MCM3 MCM4 MCM5 MCM6 MCM2	0	0	UP in siEF&EEF	19199	transmembrane receptor protein kinase activity	4.5969e-07	27	1778	0.015	DDR1 NRP1 NRP2 BMPR2 FLT1 LTBP4 LTBP1 FGFRL1 EFNB3 ERBB2 ACVR1 EPHA4 CRIM1 MERTK IGF2R PDGFRL TGFBR1 TGFBR2 TGFBR3 PTK7 ROR1 ROR2 FGFR3 MET EPHA3 FGFR1 EPHA2	0	0
UP in EWS	51174	regulation of phosphorus metabolic process	0.00018285	32	437	0.073	ERRFI1 FLT1 SDC4 PDGFB PDGFA BCL10 VLDLR THBS1 RGS4 SOCS1 PDGFD CCN2 S1PR2 DRD4 CARD10 JUN DUSP2 TGFB2 GADD45B DUSP1 GADD45A ITGA1 LIF VEGFC DUSP8 RCAN1 IL1B TRIB3 PKIG TRIB1 CD24 TLR3	0	0	UP in siEF	42981	regulation of apoptosis	1.9457e-06	112	1392	0.08	SERPINE1 ETS1 AQP1 ADORA1 PIM1 CCN2 SOX9 IL6R PHLDA1 SOX4 TGM2 IER3 CARD10 MEF2C ACTN1 IGFBP3 F2R MAPK8IP1 DDIT3 TXNIP NUPR1 SCG2 BCL10 FOXO3 FOXO1 SOCS3 BCL2L11 APH1B NUAK2 CHST11 PSAP HMOX1 BMF APOE TNFSF18 PRNP JUN TGFB2 SMAD3 HSPA5 WFS1 EIF2AK3 RAB27A FOSL1 NR4A2 TP53I3 BCL3 JMY PDE3A ID3 CD24 ITM2B HRK NRP1 COL18A1 BTG1 SIX1 LYST BBC3 HERPUD1 IFIH1 ING4 MCF2L NKX3-2 BOK CTSB SPHK1 TNFRSF18 P…	0	0	DN in EWS								0	0	DN in siEF	796	condensin complex	6.945e-07	6	873	0.006	NCAPG NCAPD2 NCAPD3 SMC4 NCAPH SMC2	0	0	UP in siEF&EEF	32989	cellular component morphogenesis	4.5969e-07	71	1778	0.039	ROBO2 NRP1 COL18A1 NRP2 CBY1 ADM LAMC1 CLU CELSR3 GLI2 ALCAM KIF5C NEFL NRCAM SOX9 SOX6 EPHA4 UNC5B STRADB ITGA1 MST1 TPM1 SHROOM3 UNC5C PRKCA MAPK8IP3 TGFBR3 VCAN RTN4RL1 PARD3 MYH9 ULK2 B3GNT2 ULK1 OBSL1 CHST3 GAS7 RTN4R LAMA5 NOTCH3 NUMBL SDC2 STXBP1 SEMA3A SEMA3B EFNA5 EFNB3 TMEM67 PDPN ERBB2 DMD APOE MSX1 WNT3 PLXNA3 BBS2 WWTR1 FIS1 TGFB2 LAMB2 FN1 LAMB1 L1CAM DCLK1 NR4A2 KLF7 RIT1 TTLL3 ID1…	0	0
UP in EWS	19220	regulation of phosphate metabolic process	0.00018285	32	437	0.073	ERRFI1 FLT1 SDC4 PDGFB PDGFA BCL10 VLDLR THBS1 RGS4 SOCS1 PDGFD CCN2 S1PR2 DRD4 CARD10 JUN DUSP2 TGFB2 GADD45B DUSP1 GADD45A ITGA1 LIF VEGFC DUSP8 RCAN1 IL1B TRIB3 PKIG TRIB1 CD24 TLR3	0	0	UP in siEF	5539	glycosaminoglycan binding	1.9793e-06	33	1392	0.023	TNXB SERPINE2 LTBP4 LPL PRELP PTN FGF1 HAPLN3 THBS1 FSTL1 THBS3 ADAMTS3 GPNMB MDK CCL2 RSPO3 APOE SUSD5 CCN2 CCN1 POSTN COL25A1 FN1 BGN PGF TGFBR2 TGFBR3 VCAN CCDC80 COL5A1 COL5A3 CD44 HBEGF	0	0	DN in EWS								0	0	DN in siEF	22616	DNA strand elongation	6.945e-07	6	873	0.006	POLA1 RFC3 FEN1 RFC4 TERT DNA2	0	0	UP in siEF&EEF	43009	chordate embryonic development	5.1846e-07	72	1778	0.04	SIX1 ECE1 ADM CELSR1 PKD2 PKD1 AMOT GLI2 EDNRA SIX4 ZMIZ1 CAPN2 SOX8 CCN1 SOX6 JUNB NKX3-2 NKX3-1 ACVR1 ITGA4 LMO4 ADAM10 SHROOM3 MAPK8IP3 TGFBR1 RGMA TGFBR2 ZEB1 COL2A1 HOXB9 HOXB4 MYH9 HOXB3 HOXB2 ZNF358 ROR2 HOXB8 HOXB7 HOXB6 EPHA2 HOXB5 DLX1 DLX2 FOXC1 SEMA3C TSHZ3 EPAS1 SATB2 TWIST1 BCL10 FUT8 BCL2L11 CHST11 RDH10 MSX1 TBX1 TFAP2A TCF7L2 SMAD3 EYA1 PRRX1 FZD6 LIF PBX1 VEGFA COL1A1 MYO1E DLC1…	0	0
UP in EWS	2685	regulation of leukocyte migration	0.00018285	8	437	0.018	GREM1 SERPINE1 HMOX1 VEGFC F2RL1 THBS1 ICAM1 TLR2	0	0	UP in siEF	61061	muscle structure development	1.9854e-06	48	1392	0.034	FOXC2 LAMA5 TAGLN FOXC1 SEMA3C TSHZ3 FHL1 TNC CBY1 SIX1 AEBP1 SGCE CSRP2 ERBB2 SPEG DMD CCN1 CTSB CDON PDGFRB SVIL CHRNB1 TCF7L2 MEF2C TGFB2 CXADR IGFBP5 LMO4 GAA TPM1 F2R LIF DYRK1B ARID5B MAPK12 SMAD7 TGFBR3 RCAN1 MYL6 SCN8A ADAM12 ITGA11 SDC1 COL6A3 CRYAB OBSL1 VAMP5 HBEGF	0	0	DN in EWS								0	0	DN in siEF	5874	microtubule	1.1942e-06	37	873	0.042	KIF14 SKA3 KIF15 AURKA SKA2 TUBA1B KLC2 RACGAP1 KIF1C KNTC1 KIF1A GTSE1 DYNC1I1 DNAH10 SPAG5 HAUS4 KIF24 KIF23 HAUS6 KIF22 CENPE TPX2 RP1 KIF18A KIF18B KATNAL1 INCENP HOOK1 KIFC1 CENPJ KIF4A BIRC5 TUBGCP3 TUBGCP4 KIF20B CALM1 FKBP4	0	0	UP in siEF&EEF	7507	heart development	6.3802e-07	51	1778	0.028	NRP1 NRP2 OXTR TNC CBY1 ECE1 PTPRJ ADM PKD2 PKD1 FGFRL1 GLI2 EDNRA ZMIZ1 CASP3 SOX9 SOX6 SOX4 NKX3-1 ACVR1 CXADR ITGA4 LMO4 GAA TPM1 TGFBR1 TGFBR2 TGFBR3 COL2A1 TEP1 CRELD1 OBSL1 ZFPM1 FOXC1 SEMA3C SHOX2 MOSPD3 LMNA ERBB2 MSX1 TBX1 TGFB2 SMAD3 VEGFA SMAD7 COL5A1 GNAQ DLC1 ID1 ID3 FBN1	0	0
UP in EWS	9891	positive regulation of biosynthetic process	0.00018816	39	437	0.089	CSRNP1 FOXC2 MAML2 EPAS1 CEBPG EBI3 CITED4 PDGFB GLIS3 PDGFA BCL10 PTGS2 FOXO3 ETS1 THBS1 ICAM1 ARNTL HMOX1 SOX8 CCN2 MSX1 CCN1 PDGFRA JUN TGFB2 MPP4 LIF FOS NR4A2 HOXB9 KLF5 DDIT3 IL1B IRF1 BCL3 PTX3 TLR3 TLR2 CREB5	0	0	UP in siEF	70482	response to oxygen levels	3.067e-06	34	1392	0.024	OXTR FLT1 EPAS1 SDC2 PDGFB PDGFA ECE1 PLAT ADM THBS1 APOLD1 AQP1 SOCS3 EDNRA PLAU PIM1 HMOX1 CCL2 CCN2 PDGFRA TGFB2 SMAD3 MMP2 ATP1B1 PGF TGFBR1 NR4A2 MMP14 DDIT4 ANGPTL2 PPARA CD24 CRYAB BIRC2	0	0	DN in EWS								0	0	DN in siEF	9059	macromolecule biosynthetic process	1.1942e-06	93	873	0.106	TOP2A HBS1L FEN1 MCM7 DSCC1 MCM10 GXYLT2 TTF2 FOXM1 BRCA2 CHTF18 CHAF1B CHAF1A PTTG1 POFUT1 EPC1 TK1 POLE EARS2 CHST8 RFC5 ST6GAL1 POU1F1 RFC3 TIPIN RFC4 ALG6 LIG1 RFC2 DARS2 LIG3 PAX5 CDC25A DBF4 SARS2 DKC1 MCM3 MCM4 NAF1 MCM5 MCM6 DNA2 DTL MCM2 BLM PCNA HLF PRIM1 PTGER3 HOXD13 PHB LIN9 RPAP1 TYMS POLD3 BRIP1 CDC45 PDF TERT ORC1 FUT9 TGS1 POLD1 HLTF E2F2 ST8SIA5 E2F3 CLSPN TAF9B VARS1 ABCF1 GINS…	0	0	UP in siEF&EEF	43065	positive regulation of apoptosis	7.2087e-07	83	1778	0.046	HRK NRP1 COL18A1 RARG TRIO B4GALT1 RASGRF2 TRADD LYST BBC3 ING4 AKAP13 PPP3CC AIFM2 ADAMTSL4 CASP3 MCF2L DPF1 ADORA1 SOX4 MAP3K5 TGM2 PHLDA3 BNIP3L PLEKHG5 ARHGEF17 ITGA1 MST1 DAPK3 SHISA5 NME3 PRKCA TGFBR1 TIAM2 ERN1 GAL TEP1 DDIT3 ARHGEF3 TXNIP ARHGEF4 TNFRSF25 SQSTM1 SOS2 BEX3 RPS27L NOD1 BCL10 PTGS2 FOXO3 STK3 TFPT BCL2L11 APH1B TP53INP1 PSAP HMOX1 PMAIP1 APOE NQO1 JUN TGFB2 MAP3K1 SMAD3 CD70…	0	0
UP in EWS	42325	regulation of phosphorylation	0.00019031	31	437	0.07	ERRFI1 FLT1 SDC4 PDGFB PDGFA BCL10 VLDLR THBS1 RGS4 SOCS1 PDGFD CCN2 S1PR2 DRD4 CARD10 JUN DUSP2 TGFB2 GADD45B DUSP1 GADD45A ITGA1 LIF VEGFC DUSP8 IL1B TRIB3 PKIG TRIB1 CD24 TLR3	0	0	UP in siEF	43067	regulation of programmed cell death	3.093e-06	112	1392	0.08	SERPINE1 ETS1 AQP1 ADORA1 PIM1 CCN2 SOX9 IL6R PHLDA1 SOX4 TGM2 IER3 CARD10 MEF2C ACTN1 IGFBP3 F2R MAPK8IP1 DDIT3 TXNIP NUPR1 SCG2 BCL10 FOXO3 FOXO1 SOCS3 BCL2L11 APH1B NUAK2 CHST11 PSAP HMOX1 BMF APOE TNFSF18 PRNP JUN TGFB2 SMAD3 HSPA5 WFS1 EIF2AK3 RAB27A FOSL1 NR4A2 TP53I3 BCL3 JMY PDE3A ID3 CD24 ITM2B HRK NRP1 COL18A1 BTG1 SIX1 LYST BBC3 HERPUD1 IFIH1 ING4 MCF2L NKX3-2 BOK CTSB SPHK1 TNFRSF18 P…	0	0	DN in EWS								0	0	DN in siEF	3824	catalytic activity	1.3441e-06	323	873	0.369	AHCYL2 PGLYRP2 POP1 NUDT1 DNHD1 ENO2 ABCA13 ALKBH8 LIPE PNP LIPI NDST4 CHEK2 C3AR1 EARS2 EPHA5 EPHA7 ST6GAL1 ALG6 DAPK1 PRKCB DDX11 ESCO2 HASPIN PASK PHKA2 ASRGL1 UHMK1 NEIL3 MTHFD1 KATNAL1 PADI2 PRKD1 DNA2 TTLL12 KIF20B CES1 PIF1 ENPEP SRCAP PRKDC PDE1B PDE1A ARX RPAP1 KALRN CYB5R2 BRIP1 DHX33 TERT FIGNL1 INPP5D HLTF DHX37 ST8SIA5 NAALAD2 HMGXB3 GSTM4 NAA50 PLK4 NGFR GSTM1 DNAH10 ABCA5 XRCC2 PLK…	0	0	UP in siEF&EEF	51674	localization of cell	7.4952e-07	65	1778	0.036	ITGB1 NRP1 NRP2 BTG1 B4GALT1 CXCL8 SIX1 PLAT LAMC1 LYST PVR AMOT CXCL16 SIX4 CDH2 NCK2 NRCAM IL6R ACVR1 ITGA4 TNFRSF12A ITGA1 RFX3 ARID5B NAV1 PRKCA TGFBR1 TGFBR3 MMP14 ADAM17 VCAN TEP1 MYH9 ITGA6 ULK1 ITGA5 AJUBA LAMA5 FOXC1 SEMA3C SATB2 TWIST1 SEMA3F CORO1A FUT8 SGPL1 PODXL FYN TGFB2 JUP LAMB2 FN1 VEGFC DCLK1 VEGFA NR4A2 KITLG COL5A1 GIPC1 ID1 JMY PLXNB1 CD24 MDGA1 BCAR1	0	0
UP in EWS	50865	regulation of cell activation	0.00019031	17	437	0.038	CD274 VCAM1 SERPINE2 EBI3 PDGFB PDGFA IL20RB BCL10 PDCD1LG2 THBS1 TNFSF13B IL1B HMOX1 CCN2 CD24 TAC1 IL13RA1	0	0	UP in siEF	5520	insulin-like growth factor binding	3.3205e-06	12	1392	0.008	IGFBPL1 IGFBP5 IGFBP4 IGFBP3 IGFBP2 HTRA1 CRIM1 CCN3 IGFBP7 CCN2 IGFBP6 CCN1	0	0	DN in EWS								0	0	DN in siEF	8152	metabolic process	1.9183e-06	367	873	0.42	SLC23A2 AHCYL2 PGLYRP2 POP1 CCNF NUDT1 RAX DNHD1 ENO2 ALKBH8 CDC20 SOX2 PREX1 LIPE PNP LIPI CHEK2 PSMD3 EPC1 EARS2 EPHA5 EPHA7 ST6GAL1 TIPIN ALG6 DAPK1 PRKCB DDX11 ESCO2 HASPIN PASK ISL1 PHKA2 ASRGL1 WDR77 UHMK1 ARC NEIL3 MTHFD1 FDX1 PADI2 PRKD1 DNA2 TTLL12 CES1 ENPEP PRKDC PDE1B ARX PIK3R1 RPAP1 KALRN CYB5R2 C5 BRIP1 TERT FIGNL1 INPP5D HLTF SLC19A3 ST8SIA5 NAALAD2 GSTM4 NAA50 PLK4 NGFR TRAP1 CDT…	0	0	UP in siEF&EEF	48870	cell motility	7.4952e-07	65	1778	0.036	ITGB1 NRP1 NRP2 BTG1 B4GALT1 CXCL8 SIX1 PLAT LAMC1 LYST PVR AMOT CXCL16 SIX4 CDH2 NCK2 NRCAM IL6R ACVR1 ITGA4 TNFRSF12A ITGA1 RFX3 ARID5B NAV1 PRKCA TGFBR1 TGFBR3 MMP14 ADAM17 VCAN TEP1 MYH9 ITGA6 ULK1 ITGA5 AJUBA LAMA5 FOXC1 SEMA3C SATB2 TWIST1 SEMA3F CORO1A FUT8 SGPL1 PODXL FYN TGFB2 JUP LAMB2 FN1 VEGFC DCLK1 VEGFA NR4A2 KITLG COL5A1 GIPC1 ID1 JMY PLXNB1 CD24 MDGA1 BCAR1	0	0
UP in EWS	50921	positive regulation of chemotaxis	0.0002137	8	437	0.018	CXCL8 SERPINE1 PDGFB KDR VEGFC F2RL1 CDH13 THBS1	0	0	UP in siEF	10941	regulation of cell death	4.6701e-06	112	1392	0.08	SERPINE1 ETS1 AQP1 ADORA1 PIM1 CCN2 SOX9 IL6R PHLDA1 SOX4 TGM2 IER3 CARD10 MEF2C ACTN1 IGFBP3 F2R MAPK8IP1 DDIT3 TXNIP NUPR1 SCG2 BCL10 FOXO3 FOXO1 SOCS3 BCL2L11 APH1B NUAK2 CHST11 PSAP HMOX1 BMF APOE TNFSF18 PRNP JUN TGFB2 SMAD3 HSPA5 WFS1 EIF2AK3 RAB27A FOSL1 NR4A2 TP53I3 BCL3 JMY PDE3A ID3 CD24 ITM2B HRK NRP1 COL18A1 BTG1 SIX1 LYST BBC3 HERPUD1 IFIH1 ING4 MCF2L NKX3-2 BOK CTSB SPHK1 TNFRSF18 P…	0	0	DN in EWS								0	0	DN in siEF	43566	structure-specific DNA binding	2.1532e-06	25	873	0.028	BLM FEN1 PCNA HLF MCM7 TTF2 HMGB1 BRCA2 HSPD1 RAD51AP1 PURB EXO1 TP63 FOXD3 ZBTB16 TET1 NR0B1 RAD23A FANCB VAX1 NEIL3 WT1 MCM4 MCM6 MCM2	0	0	UP in siEF&EEF	48598	embryonic morphogenesis	7.7584e-07	68	1778	0.038	RARG BMPR2 LDB1 TGFB1I1 SIX1 ECE1 ADM CELSR1 SOBP AMOT GLI2 SIX4 CCN1 NKX3-2 CDON ACVR1 ITGA4 LMO4 SHROOM3 TGFBR1 RGMA TGFBR2 UGDH BTD ZEB1 COL2A1 PRKAR1A HOXB4 HOXB3 HOXB2 ZNF358 ROR2 HOXB8 HOXB7 HOXB6 EPHA2 HOXB5 LAMA5 DLX2 FOXC1 CRABP2 SATB2 TSHZ1 TWIST1 BCL10 CHST11 RDH10 MYO6 MSX1 WNT3 TBX1 TFAP2A TCF7L2 SMAD3 EYA1 PRRX1 FZD6 VEGFC KLF4 PBX1 EFNA1 EXT2 GNAQ DLC1 SPRY2 TPP1 NF2 FGFR1	0	0
UP in EWS	9607	response to biotic stimulus	0.0002295	28	437	0.064	PPP1R15A IFITM2 SERPINE1 LY96 ADM BCL10 VLDLR PTGS2 HERPUD1 SOCS1 IRAK2 CASP1 TAC1 JUN ANXA3 CCL20 FOS NGF DCN DDIT3 IL1B BCL3 CYP1A1 PTX3 TRIB1 CD24 TLR3 TLR2	0	0	UP in siEF	9986	cell surface	4.9566e-06	56	1392	0.04	SRPX SERPINE2 ECE1 PLAT ICAM1 ALCAM PLAU TIMP2 ITGAV IL6R TMEM8B CTSB CDON CUBN ITGA4 TNFRSF12A PLAUR ISLR2 F3 RGMA TGFBR2 GREM1 TGFBR3 BCAM ADORA2B RTN4RL1 CDH13 ITGA6 MFGE8 CRYAB CD44 ABCG1 HBEGF CD274 NOTCH3 SDC4 PDGFB PDGFA THBS1 SCUBE3 PDLIM2 IRAK2 TNFRSF14 DMD CD59 NCAM1 APOE HSPA5 L1CAM SULF1 DCBLD2 TNFSF4 SDC1 CSPG4 PDCD1 IL7R	0	0	DN in EWS								0	0	DN in siEF	922	spindle pole	2.4455e-06	15	873	0.017	SPAG5 RANGAP1 AURKA SGO1 ASPM CENPF CCNB1 TUBGCP3 KNTC1 TUBGCP4 CALM1 FAM83D BUB1 DLGAP5 DYNC1I1	0	0	UP in siEF&EEF	48706	embryonic skeletal system development	7.7584e-07	27	1778	0.015	DLX1 DLX2 SATB2 SIX1 SIX4 CHST11 RDH10 NKX3-2 TBX1 TFAP2A SMAD3 EYA1 PRRX1 PBX1 TGFBR1 TGFBR2 COL1A1 ZEB1 COL2A1 HOXB9 HOXB4 HOXB3 HOXB2 HOXB8 HOXB7 HOXB6 HOXB5	0	0
UP in EWS	51101	regulation of DNA binding	0.00028087	15	437	0.034	JUN ANXA3 CEBPG BCL10 ICAM1 IRAK2 DDIT3 IL1B BCL3 JMY HMOX1 TPP1 TRIB1 TLR3 TLR2	0	0	UP in siEF	48705	skeletal system morphogenesis	4.9566e-06	28	1392	0.02	FOXC2 DLX2 COL11A2 SIX1 SGPL1 CHST11 RDH10 CCN2 SOX9 NKX3-2 TBX1 PDGFRB PDGFRA SMAD3 EYA1 PRRX1 MMP2 ARID5B TGFBR1 TGFBR2 COL1A1 ZEB1 COL2A1 BMP1 MGP ROR2 HOXB8 SCG2	0	0	DN in EWS								0	0	DN in siEF	71103	DNA conformation change	3.3227e-06	24	873	0.027	TOP2A HELLS SHPRH MCM7 CDCA5 NCAPG2 CAD HJURP NCAPG HMGB1 MACROH2A2 CENPA SMC4 NCAPH SMC2 CHAF1B RAD50 CHAF1A MCM4 NCAPD2 NCAPD3 MCM6 ASF1B MCM2	0	0	UP in siEF&EEF	5622	intracellular	7.7584e-07	1237	1778	0.695	CHIC2 ZNF296 AVIL ALKBH7 ZFYVE1 SCAMP5 LACTB COMTD1 DPYSL4 MLYCD SAMD11 TMEM8B ZNF287 GSTK1 GABARAPL1 MEF2C RFX3 MYL5 EML6 MYL6 PRKAR1B ASPHD1 PRKAR1A DDIT3 ETHE1 DDIT4 RBP1 TXNIP ASPHD2 OPTN ATF3 SKAP2 EXD2 ZBTB8A NLRX1 MTMR3 CRABP2 FLII SHOX2 TPRG1L AGAP2 PDGFA MTMR9 PLA2G6 DYNC2LI1 EPB41L1 PRKAR2B RDH10 PDGFC MYO6 GTF2IRD2B ABCA1 JUN JUP FUCA1 ABCA3 EDEM2 FN1 EIF2AK3 PBX3 PBX4 GRIN2C LARP6 PBX…	0	0
UP in EWS	23034	intracellular signaling pathway	0.00031501	53	437	0.121	FLT1 CXCL8 PIK3CD ADM RND3 HERPUD1 RGS4 RAC2 PMEPA1 CCN1 RALGPS2 DUSP4 CARD10 DUSP2 ITGA1 PLA2G4C DUSP8 NGF GEM RHOB RAB32 RAB31 DDIT3 IL1B ARHGEF3 RAPGEF2 CDH13 TRIB1 TLR3 TLR2 PPP1R15A CDS1 OPRD1 PTGER4 RASL12 LY96 THBS1 GNAI1 SDCBP SOCS1 IRAK2 HMOX1 FYN S1PR2 DRD4 GADD45B ARHGAP29 CORO2A MAPK10 RCAN1 BCL3 KLF9 NEK11	0	0	UP in siEF	8150	biological_process	5.7869e-06	1191	1392	0.855	ZNF296 AVIL F11R SCAMP5 ISLR DPYSL4 TDO2 TMEM8B MEF2C CXADR UNC5B UNC5C BHLHA15 HSPG2 SIGIRR CH25H MYL6 CLDN4 PRKAR1B ASPHD1 DDIT3 DDIT4 RBP1 TXNIP SPARCL1 ASPHD2 MYL9 ATF3 OPTN SKAP2 ZBTB8A NLRX1 MTMR3 LXN CRABP2 CRABP1 PDGFB PDGFA SLC5A3 ADAMTS10 ADAMTS15 EPB41L1 RDH10 PDGFC MYO6 KCNMB4 GTF2IRD2B ABCA1 JUN CADM4 JUP FUCA1 ABCA3 ABCA4 EDEM2 PBX3 EIF2AK3 FN1 PBX4 L1CAM GRIN2C COL1A1 ABTB1 PPFIBP1…	0	0	DN in EWS								0	0	DN in siEF	3682	chromatin binding	4.0037e-06	27	873	0.03	TOP2A CDCA5 SUV39H1 FAAP24 HOXD13 GLI1 CENPA SOX2 CHAF1B CHAF1A HMGN5 POLD1 RCC1 RAD54L POLE TP63 SUZ12 HELLS FANCM PRKCB NFATC3 SMC1A VAX1 POU4F2 TICRR POLA1 CENPF	0	0	UP in siEF&EEF	9792	embryonic development ending in birth or egg hatching	7.7631e-07	72	1778	0.04	SIX1 ECE1 ADM CELSR1 PKD2 PKD1 AMOT GLI2 EDNRA SIX4 ZMIZ1 CAPN2 SOX8 CCN1 SOX6 JUNB NKX3-2 NKX3-1 ACVR1 ITGA4 LMO4 ADAM10 SHROOM3 MAPK8IP3 TGFBR1 RGMA TGFBR2 ZEB1 COL2A1 HOXB9 HOXB4 MYH9 HOXB3 HOXB2 ZNF358 ROR2 HOXB8 HOXB7 HOXB6 EPHA2 HOXB5 DLX1 DLX2 FOXC1 SEMA3C TSHZ3 EPAS1 SATB2 TWIST1 BCL10 FUT8 BCL2L11 CHST11 RDH10 MSX1 TBX1 TFAP2A TCF7L2 SMAD3 EYA1 PRRX1 FZD6 LIF PBX1 VEGFA COL1A1 MYO1E DLC1…	0	0
UP in EWS	9888	tissue development	0.00031501	39	437	0.089	ERRFI1 NRP1 FOXC2 CSTA TUFT1 SERPINE1 PDGFB PDGFA ADM BCL10 F11R PTGS2 TGM1 GPNMB KDR DMD SOX8 CCN2 MSX1 CCN1 NKX3-1 KLF10 JUN TGFB2 CXADR FZD6 LIF KRT34 VEGFC KLF4 DKK1 ASPN DCN COL1A1 GREM1 RCAN1 COL5A3 TXNIP INA	0	0	UP in siEF	30054	cell junction	5.8133e-06	76	1392	0.054	PTPRU SYNM PRR7 PATJ OXTR ITGB5 TGFB1I1 PTPRO FHL2 SLC2A1 PIK3CD PTPRJ F11R TGM1 SCAMP5 PANX2 CDH2 HOMER3 SYNPO LZTS1 CGNL1 TNS2 ANKS1B CHRNB1 CXADR UNC13A ACTN1 SHROOM2 LMO7 SYNGR3 CLDN11 TANC1 CLDN4 TBC1D2 ADAM15 ITGA6 AJUBA SHANK3 OBSL1 TAMALIN SDC4 FBLIM1 NTN4 NEXN LPL NEDD9 PPL LPP CNN2 PDLIM2 PDZD2 NPHP1 MICALL2 DMD PCDH1 RABAC1 JAM2 PDLIM7 JUP PARVA PARVB WTIP GRIN2C SORBS3 SYT7 AIF1L OCLN…	0	0	DN in EWS								0	0	DN in siEF	5730	nucleolus	4.6886e-06	50	873	0.057	RBM28 CSRNP3 POP1 HJURP HMGB1 MKI67 WDR43 IPO5 HMGN5 XPO1 EME1 ACTN2 DIMT1 DDX11 DDX54 VRK1 URB1 ETV4 ARC DKC1 GRWD1 G2E3 GEMIN4 NAF1 KIF20B BLM HEATR1 DDX21 NOL4 NOL6 EMG1 TCOF1 DHX33 TERT EXOSC9 NSD2 BRIX1 UTP20 CCT5 TOE1 NOP56 PLK4 NOC3L PA2G4 MPP6 NLE1 RCL1 POLA1 MYBBP1A TSR1	0	0	UP in siEF&EEF	31090	organelle membrane	8.1306e-07	259	1778	0.145	ANTXR2 SCAMP5 GOLGA2 LGALS3 EDNRA CREB3L4 CREB3L1 BSG CREB3L2 AP1S2 ARL6IP5 CYP1B1 IL15RA CPT1A ACSL1 ENTPD6 PAQR3 ENTPD7 HLA-A MAPK8IP3 FNDC5 CYP2U1 ASPHD1 ASPHD2 TAGLN2 KDELR2 ULK1 KDELR3 ATP6V0D1 STX1A CFD NLRX1 SLC35D1 FUT11 PEX11B UBE2J1 UGCG SYNGR1 SGPL1 CHST11 PRKAR2B RDH10 PDGFC MYO6 ST3GAL4 ST3GAL5 ST3GAL6 CHST14 ST3GAL1 SEC31B RAB11FIP4 B4GALNT4 RAB11FIP5 VAT1 FIS1 FZD5 SLC33A1 EIF2AK3 …	0	0
UP in EWS	45765	regulation of angiogenesis	0.00031501	11	437	0.025	BTG1 ANGPT2 ANXA3 IL1B SERPINE1 HMOX1 PTGS2 HDAC9 THBS1 RHOB AMOT	0	0	UP in siEF	9605	response to external stimulus	6.2085e-06	79	1392	0.056	HRK PCSK1 CXCL8 ADM LYST CXCL14 ASGR1 AQP1 CXCL16 MAP1LC3A PLAU LEPR CCN1 IL6R CTSD RGS9 CMKLR1 CTSB PDGFRB CUBN WNT5B SPHK1 IGFBP2 SHROOM2 PLAUR SSTR2 NGF F3 MMP14 PITPNM1 ADORA2B DDIT3 TXNIP ITGA6 PPARA DOCK2 SCG2 CD44 SP100 LXN COL11A1 PDGFB PDGFA PLD1 PTGS2 CNN2 SOCS3 NUAK2 STC2 HSD17B2 SPP1 HMOX1 CCL2 FYN IGFBP7 A2M MEST WNT3 PLXNA3 GSDMD JUN TGFB2 GSN JUP HSPA5 CMTM3 FZD7 ABCA4 SUOX ASS1 FO…	0	0	DN in EWS								0	0	DN in siEF	44085	cellular component biogenesis	6.9655e-06	89	873	0.101	AHCTF1 SUV39H1 HJURP IL1RAP PREX1 VMO1 CHAF1B TUBA1B BAIAP2L2 CHAF1A KNTC1 FBXO5 KPNA3 TP63 NDC1 HELLS SHPRH SYK ACTN2 DIMT1 HAUS4 HAUS6 TEX15 KNL1 WDR77 OLFM1 DKC1 TCP1 GEMIN4 ATG4C GEMIN5 NAF1 FKBP4 ASF1B MCM2 BLM NUP205 KCNA2 HEATR1 DDX21 THY1 MACROH2A2 CENPA ACAT2 NOL6 HSPD1 FGD4 PARD6B CCNB1 EMG1 RACGAP1 TERT EXOSC9 TGS1 NACC1 E2F2 COX11 BRIX1 E2F3 UTP20 PDSS1 TAF9B MDN1 NOP56 GABBR1 RRM1 RR…	0	0	UP in siEF&EEF	43068	positive regulation of programmed cell death	9.1895e-07	83	1778	0.046	HRK NRP1 COL18A1 RARG TRIO B4GALT1 RASGRF2 TRADD LYST BBC3 ING4 AKAP13 PPP3CC AIFM2 ADAMTSL4 CASP3 MCF2L DPF1 ADORA1 SOX4 MAP3K5 TGM2 PHLDA3 BNIP3L PLEKHG5 ARHGEF17 ITGA1 MST1 DAPK3 SHISA5 NME3 PRKCA TGFBR1 TIAM2 ERN1 GAL TEP1 DDIT3 ARHGEF3 TXNIP ARHGEF4 TNFRSF25 SQSTM1 SOS2 BEX3 RPS27L NOD1 BCL10 PTGS2 FOXO3 STK3 TFPT BCL2L11 APH1B TP53INP1 PSAP HMOX1 PMAIP1 APOE NQO1 JUN TGFB2 MAP3K1 SMAD3 CD70…	0	0
UP in EWS	51707	response to other organism	0.00031501	24	437	0.054	JUN ANXA3 CCL20 SERPINE1 LY96 ADM BCL10 FOS VLDLR PTGS2 NGF DCN SOCS1 IRAK2 IL1B BCL3 CYP1A1 CASP1 PTX3 TRIB1 CD24 TAC1 TLR3 TLR2	0	0	UP in siEF	1871	pattern binding	6.2085e-06	34	1392	0.024	TNXB SERPINE2 LTBP4 LPL PRELP PTN FGF1 HAPLN3 THBS1 FSTL1 THBS3 ADAMTS3 GPNMB MDK CCL2 RSPO3 APOE SUSD5 CCN2 CCN1 POSTN COL25A1 FN1 BGN PGF TGFBR2 TGFBR3 VCAN CCDC80 COL5A1 COL5A3 PTX3 CD44 HBEGF	0	0	DN in EWS								0	0	DN in siEF	3674	molecular_function	7.3338e-06	805	873	0.922	PGLYRP2 POP1 TMEM97 CLDN1 ALKBH8 PREX1 LIPE RAVER1 LIPI NDST4 PSMD3 RAVER2 C3AR1 ANKFY1 GTSE1 WDHD1 UNC5A TSTD2 FNBP1 RFX2 ISL1 PHKA2 SLC5A6 MTHFD1 PSME4 PADI2 PIF1 TTYH2 CDCA3 CDCA5 NCAPG SLCO5A1 THY1 CYB5R2 C5 HSPH1 FIGNL1 HMGXB3 PPARGC1B GSTM4 TOE1 NGFR GSTM1 ABCA5 NR0B1 FLI1 FAM111B AGO2 SFXN1 CYB5RL STRN SFXN2 EZH2 LRRC34 LRRC10B NCAPG2 LRRC4 HOXC12 JPH1 ARHGAP4 CHAF1B TUBA1B CHAF1A SMPD1 SH…	0	0	UP in siEF&EEF	42995	cell projection	9.2547e-07	125	1778	0.07	OXTR CIB1 AMOT ALCAM CDH2 KIF5C KIF5A ADORA1 NRCAM TBC1D10A CAST ACTN1 TMOD2 TPM1 CYBA IFT80 ACTN4 MAPK8IP3 MAPK8IP1 TIAM2 ADAM15 SCN8A ULK1 TTLL11 TLN2 ATP6V0D1 AJUBA STX1A SLC22A5 SDC3 PDGFA CACNA1C PLD1 CORO1A RTN4 DYNC2LI1 SLC9A3R1 CALD1 PODXL MYO6 NPHP1 APOE S100A11 BBS2 PLK3 TGFB2 WFS1 RAB27A CYBRD1 PARVA SYNJ2 KLHL24 L1CAM AIF1L ARHGAP31 CDK6 GIPC1 SDC1 CSPG4 NF2 ITGB1 SPAG16 ROBO2 NRP1 PY…	0	0
UP in EWS	17017	MAP kinase tyrosine/serine/threonine phosphatase activity	0.000327	5	437	0.011	DUSP4 DUSP5 DUSP2 DUSP1 DUSP8	0	0	UP in siEF	30247	polysaccharide binding	6.2085e-06	34	1392	0.024	TNXB SERPINE2 LTBP4 LPL PRELP PTN FGF1 HAPLN3 THBS1 FSTL1 THBS3 ADAMTS3 GPNMB MDK CCL2 RSPO3 APOE SUSD5 CCN2 CCN1 POSTN COL25A1 FN1 BGN PGF TGFBR2 TGFBR3 VCAN CCDC80 COL5A1 COL5A3 PTX3 CD44 HBEGF	0	0	DN in EWS								0	0	DN in siEF	724	double-strand break repair via homologous recombination	7.3338e-06	9	873	0.01	RAD51AP1 BLM SLX4 XRCC2 UBE2N RAD54L BRCA1 FANCB BRCA2	0	0	UP in siEF&EEF	23034	intracellular signaling pathway	1.0652e-06	174	1778	0.097	RAB3B PATJ OXTR TRAF3IP2 CD81 DGKA ZFP36 EDNRA RPS6KA5 RPS6KA2 ADORA1 MAP3K6 CCN1 MAP3K5 TGM2 PDK1 PHLDA3 CARD10 PRKCD DAPK3 F2R PRKCA MAPK8IP2 MAPK8IP3 GEM MAPK8IP1 RAB32 ERN1 RAB30 RAB31 RAB36 RRAGC PRKAR1A DDIT3 MAPKAPK2 ULK1 ROR2 RIN2 SQSTM1 ARL8A CFD SHC2 RAB5B INSIG2 INSIG1 ARL3 AGAP2 FOXO4 PLD1 RHOBTB1 STK3 IRAK2 PRKAR2B MYO6 HMOX1 APOE RALGDS ABCA1 WWTR1 FZD2 GADD45B HSPA5 WFS1 EIF2AK3 RA…	0	0
UP in EWS	1817	regulation of cytokine production	0.00036875	17	437	0.038	TGFB2 SERPINE1 CEBPG EBI3 IL20RB BCL10 PTGS2 THBS1 KLF2 IL1B IRF1 BCL3 CASP1 HMOX1 CD24 TLR3 TLR2	0	0	UP in siEF	7517	muscle organ development	6.7443e-06	41	1392	0.029	FOXC2 LAMA5 TAGLN FOXC1 SEMA3C TSHZ3 FHL1 TNC CBY1 SIX1 AEBP1 SGCE ERBB2 SPEG DMD CCN1 CTSB PDGFRB SVIL MEF2C TGFB2 CXADR IGFBP5 LMO4 GAA TPM1 F2R LIF ARID5B MAPK12 SMAD7 TGFBR3 RCAN1 MYL6 SCN8A ITGA11 COL6A3 CRYAB OBSL1 VAMP5 HBEGF	0	0	DN in EWS								0	0	DN in siEF	725	recombinational repair	7.3338e-06	9	873	0.01	RAD51AP1 BLM SLX4 XRCC2 UBE2N RAD54L BRCA1 FANCB BRCA2	0	0	UP in siEF&EEF	65008	regulation of biological quality	1.077e-06	220	1778	0.123	OXTR AVIL ABAT EDNRA FTH1 CYP1B1 SOX8 CCN1 SOX6 SOX4 TSPYL2 ATP6V0E1 PRKCD PRKCA RRAGC TEP1 DDIT3 KDELR2 ULK1 TLN2 KDELR3 STX1A EPHA3 HOXB6 SLC22A5 CRABP2 EPAS1 STXBP1 TXN SYNGR1 PRDX5 RDH10 MYO6 HMOX1 KCNMB4 APOE BBS2 ABCA1 JUN FZD2 DMPK FN1 EIF2AK3 RAB27A GRIN2C DCLK1 EHD1 GIPC1 CD24 ROBO2 ACHE NRP1 RARG BTG1 ADM PCSK6 TRIOBP HERPUD1 CTSO SLC22A17 TMSB4X NEFL TNKS1BP1 NEFM SH3BGRL3 QSOX1 TIMP1 …	0	0
UP in EWS	51704	multi-organism process	0.00037305	40	437	0.091	FLT1 SERPINE1 LY96 ADM BCL10 VLDLR F11R PTGS2 ICAM1 CLGN SOCS1 IRAK2 KDR CASP1 FYN APOL1 TAC1 DRD4 JUN CXADR ANGPT2 VCAM1 ANXA3 CCL20 PLA2G4C LIF FOS NGF DCN VGF IL1B MAFF BCL3 KLF9 CYP1A1 PTX3 TRIB1 CD24 TLR3 TLR2	0	0	UP in siEF	8092	cytoskeletal protein binding	8.006e-06	74	1392	0.053	SYNM AVIL FBXO25 TNC KLHL35 MYPN TRIOBP CFL2 TMSB4X ENC1 COTL1 NCK2 PHACTR2 SYNPO APC2 MYLIP ANXA2 ACTN1 TPM2 TMOD2 TPM1 SHROOM2 LMO7 MAPK8IP2 ANK1 MAPK8IP1 RCN3 DAAM2 PALLD CDC42EP3 S100A6 CRYAB OBSL1 GAS7 TAGLN SDC4 SYNPO2 SDC2 SDC3 NEXN LPL CNN3 CNN2 CNN1 BCL2L11 EPB41L1 CALD1 MYO6 MAP6 FYN DMD APOE FLNC RAB11FIP5 SVIL PRNP GSN MIB2 RAB27A DSTN PARVA PARVB CORO2A FHDC1 CORO2B SORBS3 AIF1L MYO1…	0	0	DN in EWS								0	0	DN in siEF	50794	regulation of cellular process	7.7631e-06	377	873	0.431	RB1 POP1 CCNF RAX TMEM97 IKZF2 CDC20 SOX2 PREX1 BAIAP2L2 SOX1 PNP CHEK2 PSMD3 MYB C3AR1 RCC1 EPC1 DPF3 FBXO5 GTSE1 TP63 CER1 EPHA7 TIPIN UNC5A ACTN2 DAPK1 PRKCB SFMBT2 DDX11 RFX2 KNL1 HASPIN PASK ISL1 DKK2 WDR77 UHMK1 TIAM1 DEPDC1B ARC ZNF718 SPATA13 PRKD1 DNA2 KIF20B ASF1B PIF1 SRCAP PRKDC PDE1B PDE1A ARX CDCA7 THY1 PIK3R1 SKA3 KALRN SKA2 C5 BRIP1 RACGAP1 TERT INPP5D HLTF ALX4 PPARGC1B NKX2-2 PL…	0	0	UP in siEF&EEF	10942	positive regulation of cell death	1.3474e-06	83	1778	0.046	HRK NRP1 COL18A1 RARG TRIO B4GALT1 RASGRF2 TRADD LYST BBC3 ING4 AKAP13 PPP3CC AIFM2 ADAMTSL4 CASP3 MCF2L DPF1 ADORA1 SOX4 MAP3K5 TGM2 PHLDA3 BNIP3L PLEKHG5 ARHGEF17 ITGA1 MST1 DAPK3 SHISA5 NME3 PRKCA TGFBR1 TIAM2 ERN1 GAL TEP1 DDIT3 ARHGEF3 TXNIP ARHGEF4 TNFRSF25 SQSTM1 SOS2 BEX3 RPS27L NOD1 BCL10 PTGS2 FOXO3 STK3 TFPT BCL2L11 APH1B TP53INP1 PSAP HMOX1 PMAIP1 APOE NQO1 JUN TGFB2 MAP3K1 SMAD3 CD70…	0	0
UP in EWS	6955	immune response	0.00037305	34	437	0.077	OPRD1 PTGER4 COLEC12 CD274 IFITM2 CXCL8 FHL1 CEBPG EBI3 IL20RB LY96 BCL10 ETS1 THBS1 TNFSF13B ICAM1 NFIL3 APOL1 CD55 ANXA3 CCL20 LIF PDCD1LG2 MR1 GEM BST1 IL1B BCL3 SERPING1 PTX3 PDCD1 ULBP1 TLR3 TLR2	0	0	UP in siEF	44425	membrane part	9.5765e-06	567	1392	0.407	PATJ SERPINE2 TMEM200A TRIL MRGPRF F11R GRPR EPS8 NYNRIN SCAMP5 GPR173 COMTD1 GPR176 ALCAM CREB3L1 CREB3L2 AP1S2 CYP1B1 HOMER3 CMKLR1 TMEM8B IER3 ANKS1B CUBN CXADR UNC13A UNC5B FNDC3B UNC5C SIGIRR CH25H BCAM CLDN4 ASPHD1 ORAI3 ORAI2 ASPHD2 RNF122 CFD FICD BCL10 SLC5A3 CHST11 RNF215 EPB41L1 RDH10 MYO6 HMOX1 ST3GAL5 KCNMB4 CHST14 ABCA1 CADM4 FZD2 JUP FZD5 MCAM ABCA3 FZD7 ABCA4 FZD6 EIF2AK3 L1CAM GR…	0	0	DN in EWS								0	0	DN in siEF	30261	chromosome condensation	8.8217e-06	10	873	0.011	TOP2A CDCA5 NCAPG2 CAD NCAPG NCAPD2 NCAPD3 SMC4 NCAPH SMC2	0	0	UP in siEF&EEF	31982	vesicle	1.3762e-06	118	1778	0.066	CHIC2 SPARC SERPINE2 GOLIM4 PLAT AMOT SCAMP5 CNST BSG PALM AP1S2 FAM3C PDK1 IL15RA SERPINF1 IGFBP2 ENTPD7 ADAM10 CYBA PDIA4 ADAM15 BIN1 SCN8A RIN3 ULK1 PPIB ATP6V0D1 OPTN STX1A CFD RAB5B STXBP1 TPRG1L ITPR1 PDGFA PLD1 CORO1A HSP90B1 SYNGR1 PCSK1N SYNGR2 APH1B MYO6 BMF NPTX1 SEC31B VAT1 ABCA1 TGFB2 HSPA5 ABCA3 FN1 RAB27A IGF2R SYT7 EHD1 EHD3 BMP1 APPBP2 GIPC1 TPP1 ITGB1 CLIC4 SH3KBP1 DENND1A SLC2A…	0	0
UP in EWS	50926	regulation of positive chemotaxis	0.00037305	6	437	0.013	ANGPT2 CXCL8 KDR VEGFC F2RL1 CDH13	0	0	UP in siEF	44449	contractile fiber part	9.6054e-06	26	1392	0.018	MYOM1 SYNM SDC4 TNC FHL2 NEXN CACNA1C MYPN JPH2 ANKRD1 DMD FLNC CCN1 SVIL JUP LMO4 ACTN1 TPM2 MMP2 TPM1 ANK1 ACTA2 CRYAB TRIM54 OBSL1 MYL9	0	0	DN in EWS								0	0	DN in siEF	6271	DNA strand elongation involved in DNA replication	1.2197e-05	5	873	0.005	POLA1 RFC3 FEN1 RFC4 DNA2	0	0	UP in siEF&EEF	70482	response to oxygen levels	1.4301e-06	40	1778	0.022	OXTR FLT1 EPAS1 SDC2 ITPR1 PDGFA ECE1 PLAT ABAT ADM VLDLR APOLD1 HSP90B1 SLC2A8 EDNRA ALDH2 PDPN PIM1 CAPN2 HMOX1 TGFB2 SMAD3 ITGA2 BNIP3 MMP2 ACTN4 ATP1B1 PGF TGFBR1 VEGFA NR4A2 MMP14 ADAM17 DDIT4 HYOU1 ALDOC PPARA CD24 BIRC2 BCL2L1	0	0
UP in EWS	19838	growth factor binding	0.00037305	12	437	0.027	COL1A1 NRP1 PDGFRA FLT1 PDGFB KDR PDGFA CCN2 CCN1 A2M LTBP1 THBS1	0	0	UP in siEF	5178	integrin binding	9.7917e-06	19	1392	0.013	LAMA5 COL16A1 TNXB ITGB5 ACTN1 LTBP4 L1CAM THBS1 FBLN5 ICAM1 COL3A1 GPNMB COL5A1 KDR TIMP2 ITGA6 CCN2 TGFBI MFGE8	0	0	DN in EWS								0	0	DN in siEF	5856	cytoskeleton	1.2918e-05	111	873	0.127	RB1 RIF1 CCNF DNHD1 BUB1B CDC20 PNP ARHGDIB KNTC1 FBXO5 GTSE1 FNBP1 ACTN2 DAPK1 MYH15 USP2 PASK SGO1 ARC KATNAL1 PKP1 KIF20B FKBP4 EPB41 SKA3 KALRN SKA2 CCNB1 KLC2 RACGAP1 TTC21B FAM83D PLK4 DNAH10 PLK1 FANCB SSH2 FLI1 ANLN TPX2 DIAPH1 KIF18A DLG2 KIF18B HOOK1 DLG4 KIF4A SASS6 STRN TUBGCP3 TUBGCP4 CALM1 KIF14 BRCA1 KIF11 BRCA2 MYOM2 KIF15 LMNB1 TRIM9 TUBA1B NETO1 KIF1C DLGAP1 KIF1A NOS1 DLGAP5 CE…	0	0	UP in siEF&EEF	30030	cell projection organization	1.4545e-06	71	1778	0.039	SPAG16 ROBO2 NRP1 NRP2 ITGB4 CBY1 ADM LAMC1 CLU CELSR3 GLI2 ALCAM KIF5C NCK2 NEFL NRCAM EPHA4 UNC5B ITGA1 TPM1 UNC5C PRKCA MAPK8IP3 DNM3 VCAN RTN4RL1 PARD3 MYH9 ULK2 B3GNT2 ITGA6 ULK1 AJUBA VCL CHST3 GAS7 RTN4R LAMA5 NUMBL SDC2 STXBP1 SEMA3A SEMA3B PDGFA CAPG EFNA5 CORO1A DYNC2LI1 EFNB3 TMEM67 MYO6 NPHP1 ERBB2 DMD STX3 APOE PLXNA3 BBS2 WWTR1 LAMB2 LAMB1 L1CAM DCLK1 NR4A2 KLF7 RIT1 KLF5 TTLL3 TTC3…	0	0
UP in EWS	30154	cell differentiation	0.00037305	69	437	0.157	NRP1 FLT1 SERPINE2 FHL1 TNFAIP2 ADM F11R CELSR3 AMOT TGM1 KIF5C TIMP2 KDR CASP1 SOX8 CCN2 CCN1 EPHA4 PDGFRA CXADR TNFRSF12A ITGA1 ISLR2 NGF NPNT DKK1 RHOB IRF1 TXNIP MMP19 INA FOXC2 SLFN5 BEX2 CSTA NDRG4 RTN1 EPAS1 LAMA4 SEMA3B CEBPG FOXO3 HDAC9 APOLD1 SOCS1 GPNMB FRZB DMD FYN TSPAN2 STX3 MSX1 JUN MCOLN3 TGFB2 ANGPT2 VCAM1 TXNRD3 GADD45B LIF VEGFC KLF4 COL1A1 NR4A2 RCAN1 SNRK BCL3 CYP1A1 PTX3	0	0	UP in siEF	45595	regulation of cell differentiation	1.1841e-05	78	1392	0.056	NRP1 ERRFI1 BTG1 LDB1 CSF1 SERPINE2 TGFB1I1 SIX1 ETS1 PTPRG CDH2 BOC TIMP2 ITGAV SOX8 SOX9 IL6R LZTS1 APC2 IL4R WNT5B TNFRSF12A METRN SPHK1 IGFBP3 LMO2 FNDC3B ISLR2 NGF DKK1 TGFBR1 EREG TGFBR2 GREM1 ZEB1 ULK1 PPARA TRIB2 SCG2 ABCG1 RTN4R NOTCH3 DLX2 TSHZ3 BRI3 SEMA3A LRRC17 LTBP4 LPL DTX1 SEMA3F FOXO3 APOLD1 FSTL3 SOCS3 ERBB2 SPP1 HSF4 NPHP3 APOE PDLIM7 PLXNA3 ABCA1 TCF7L2 JUN TGFB2 SMAD3 EYA1 BA…	0	0	DN in EWS								0	0	DN in siEF	3676	nucleic acid binding	1.299e-05	218	873	0.249	RB1 RAX IKZF2 ALKBH8 SOX2 SOX1 RAVER1 RAVER2 MYB TP63 EARS2 WDHD1 DDX11 RFX2 ESCO2 HASPIN ISL1 UHMK1 ARC NEIL3 ZNF718 DNA2 PIF1 SRCAP PRKDC ARX RPAP1 RRP7A BRIP1 DHX33 TERT HLTF DHX37 ALX4 HMGXB3 PPARGC1B RBM11 NKX2-2 TOE1 CDT1 EGR2 BCL11B XRCC2 EAF2 NFATC3 NR0B1 PA2G4 FLI1 POLA1 AGO2 REL HOXD4 HOXD3 RCOR1 HOXD8 ZNF135 EZH2 TP73 TOP2A BARHL2 HBS1L AHCTF1 FEN1 CSRNP3 BRCA1 HOXC12 BRCA2 GLI1 KIF15 …	0	0	UP in siEF&EEF	5794	Golgi apparatus	1.6508e-06	140	1778	0.078	TMEM167B CHPF GOLT1B CLSTN3 GOLIM4 ZFYVE1 GALNT10 SCAMP5 GOLGA2 LAPTM4A CNST CREB3L4 BSG AP1S2 DENND5A SH3GLB1 IL15RA GABARAPL1 SCARA3 ENTPD6 PAQR3 F2R ADAM10 CYBA HLA-A MAPK8IP3 CLIP3 TPST1 GOLGA8B RAB30 RAB31 RAB36 RRAGB KDELR2 OPTN RNF122 ABCG1 SDC4 BRI3 ARL3 FUT11 TMEM59L RHOBTB3 PLD1 FUT8 PCSK1N CHST11 PDGFC MYO6 PSAP ST3GAL4 ST3GAL5 ST3GAL6 APOE CHST14 ST3GAL1 B4GALNT4 ABCA1 PRNP TRAPPC1 FZ…	0	0
UP in EWS	10557	positive regulation of macromolecule biosynthetic process	0.00037923	36	437	0.082	CSRNP1 FOXC2 MAML2 EPAS1 CEBPG EBI3 CITED4 PDGFB GLIS3 PDGFA BCL10 FOXO3 ETS1 THBS1 ARNTL HMOX1 SOX8 CCN2 MSX1 CCN1 PDGFRA JUN TGFB2 MPP4 LIF FOS NR4A2 HOXB9 KLF5 DDIT3 IL1B IRF1 BCL3 TLR3 TLR2 CREB5	0	0	UP in siEF	9991	response to extracellular stimulus	1.1846e-05	46	1392	0.033	HRK PCSK1 SP100 PDGFA ADM PTGS2 ASGR1 AQP1 SOCS3 MAP1LC3A NUAK2 STC2 HSD17B2 SPP1 LEPR HMOX1 CCL2 IGFBP7 A2M CTSD MEST WNT3 GSDMD CUBN JUN GSN WNT5B HSPA5 SPHK1 FZD7 IGFBP2 SUOX SSTR2 ASS1 FOSL1 COL1A1 NR4A2 ADORA2B AXL DDIT3 MGP ALPL ITGA6 PPARA NES CD44	0	0	DN in EWS								0	0	DN in siEF	3774	motor activity	1.4096e-05	23	873	0.026	DNAH10 MYO10 MYH15 KIF14 DNHD1 KIF24 KIF23 KIF11 KIF22 SMC1A MYO19 KIF15 CENPE KIF18A KLC2 KIF18B KIFC1 KIF4A KIF1C KIF2C KIF1A KIF20B DYNC1I1	0	0	UP in siEF&EEF	48704	embryonic skeletal system morphogenesis	1.6729e-06	22	1778	0.012	TBX1 TFAP2A DLX2 SMAD3 EYA1 PRRX1 SATB2 SIX1 TGFBR1 TGFBR2 ZEB1 COL2A1 SIX4 CHST11 RDH10 HOXB4 HOXB3 HOXB2 HOXB8 HOXB7 HOXB6 HOXB5	0	0
UP in EWS	6915	apoptosis	0.00038149	32	437	0.073	PPP1R15A CSRNP1 TNFAIP3 BCL10 FOXO3 THBS1 BBC3 CECR2 DRAM1 APH1B CASP1 PHLDA1 IER3 BOK JUN GADD45B TNFRSF12A GADD45A TNFRSF18 NGF RHOB GULP1 GREM1 RNF144B RYBP IL1B DDIT4 ARHGEF3 PTPN6 TRIB3 PDCD1 MET	0	0	UP in siEF	10647	positive regulation of cell communication	1.2442e-05	63	1392	0.045	OXTR FLT1 CSF1 GOLT1B SLC44A2 TGFB1I1 SECTM1 ECE1 LITAF AKAP12 LEPR IL6R LMCD1 SOX4 TGM2 IL11 DENND2B PLEKHG5 TMOD2 F2R MAPK8IP2 RHOC F3 MID1 TGFBR1 EREG CDH13 S100A4 SCG2 BIRC2 CD44 HBEGF PDGFB BCL10 PTGS2 CXXC5 THBS1 ERBB2 S100A13 HMOX1 CCL2 NCAM1 TAC1 TCF7L2 TGFB2 SMAD3 JUP RBPMS PRRX1 NEK6 PLK2 EIF2AK3 LIF MIB2 L1CAM SORBS3 REC8 BST2 PINK1 CLCF1 GIPC1 C18ORF32 MAP3K14	0	0	DN in EWS								0	0	DN in siEF	7018	microtubule-based movement	1.5182e-05	20	873	0.022	DNAH10 KIF14 DNHD1 KIF24 KIF23 KIF11 KIF22 KIF15 CENPE TUBA1B KIF18A KLC2 KIF18B KIFC1 KIF4A KIF1C KIF2C KIF1A KIF20B DYNC1I1	0	0	UP in siEF&EEF	51272	positive regulation of cellular component movement	2.4352e-06	36	1778	0.02	COL18A1 BMPR2 FLT1 CSF1 PDGFA FURIN PLD1 PTGS2 CORO1A AMOT CXCL16 PODXL PDPN IL6R TGFB2 SMAD3 WNT5B ANXA3 SPHK1 ITGA2 F2R VEGFC ADAM10 RRAS2 LAMB1 ACTN4 F3 TGFBR1 VEGFA CREB3 ADAM17 F2RL1 ROR2 BCAR1 CHST3 HBEGF	0	0
UP in EWS	23014	signal transmission via phosphorylation event	0.00039533	24	437	0.054	DUSP4 CARD10 DUSP2 FLT1 GADD45B ITGA1 LY96 DUSP8 THBS1 RGS4 MAPK10 SOCS1 IRAK2 IL1B BCL3 HMOX1 RAPGEF2 FYN S1PR2 TRIB1 DRD4 TLR3 TLR2 NEK11	0	0	UP in siEF	43292	contractile fiber	1.3552e-05	27	1392	0.019	MYOM1 SYNM SDC4 TNC FHL2 NEXN CACNA1C MYPN JPH2 CALD1 ANKRD1 DMD FLNC CCN1 SVIL JUP LMO4 ACTN1 TPM2 MMP2 TPM1 ANK1 ACTA2 CRYAB TRIM54 OBSL1 MYL9	0	0	DN in EWS								0	0	DN in siEF	7076	mitotic chromosome condensation	1.7808e-05	7	873	0.008	CDCA5 NCAPG NCAPD2 NCAPD3 SMC4 NCAPH SMC2	0	0	UP in siEF&EEF	30055	cell-substrate junction	2.7885e-06	27	1778	0.015	TES ITGB5 SDC4 FBLIM1 SH3KBP1 TGFB1I1 FHL2 NEXN LPP LASP1 DMD PDLIM7 TNS2 DST ITGA2 ACTN1 PARVA PARVB AIF1L ARHGAP31 DLC1 ZYX SDC1 TLN2 AJUBA BCAR1 VCL	0	0
UP in EWS	7243	intracellular protein kinase cascade	0.00039533	24	437	0.054	DUSP4 CARD10 DUSP2 FLT1 GADD45B ITGA1 LY96 DUSP8 THBS1 RGS4 MAPK10 SOCS1 IRAK2 IL1B BCL3 HMOX1 RAPGEF2 FYN S1PR2 TRIB1 DRD4 TLR3 TLR2 NEK11	0	0	UP in siEF	8201	heparin binding	1.6283e-05	26	1392	0.018	TNXB SERPINE2 LPL PRELP PTN FGF1 THBS1 FSTL1 THBS3 ADAMTS3 GPNMB MDK CCL2 RSPO3 APOE CCN2 CCN1 POSTN COL25A1 FN1 PGF TGFBR3 CCDC80 COL5A1 COL5A3 HBEGF	0	0	DN in EWS								0	0	DN in siEF	794	condensed nuclear chromosome	3.08e-05	13	873	0.014	BLM SUV39H1 PLK1 SMC1A CENPA AURKB NOL6 SGO1 CCNB1 INCENP RCC1 NCAPD3 BUB1	0	0	UP in siEF&EEF	42127	regulation of cell proliferation	2.7885e-06	134	1778	0.075	SPARC CSF1 CD81 CBLB COMT CLU FGFRL1 EDNRA ZMIZ1 FTH1 SESN1 NAMPT ADORA1 SOX8 SOX9 CCN1 KIFAP3 IL6R SOX4 TNS2 TGM2 IL13RA1 CXADR IGFBP5 SERPINF1 CTNNBIP1 F2R VASH2 ADAM10 P3H1 PRKCA VASH1 PGF ADAM17 TEP1 TXNIP KCTD11 ROR2 ATF3 SKAP2 PDGFA FOXO4 CORO1A FOXO1 CHST11 NACC2 PDGFC HMOX1 APOE S100A11 CD276 WWTR1 JUN TGFB2 SMAD3 FZD7 LIF PBX1 FOSL2 FOSL1 CDK6 NF2 CD24 FGFR3 MXD4 BCL2L1 FGFR1 CDKN1C NRP1…	0	0
UP in EWS	40011	locomotion	0.00041821	27	437	0.061	NRP1 BTG1 CXCL8 PDGFB PDGFA ETS1 THBS1 ICAM1 AMOT SDCBP RAC2 FYN CCN2 CCN1 CTHRC1 TGFB2 VCAM1 DNAH17 TNFRSF12A CCL20 ITGA1 VEGFC NR4A2 IL1B JMY CDH13 CD24	0	0	UP in siEF	1666	response to hypoxia	2.1213e-05	31	1392	0.022	FLT1 EPAS1 SDC2 PDGFB PDGFA ECE1 PLAT ADM THBS1 APOLD1 AQP1 SOCS3 EDNRA PLAU PIM1 HMOX1 CCL2 TGFB2 SMAD3 MMP2 ATP1B1 PGF TGFBR1 NR4A2 MMP14 DDIT4 ANGPTL2 PPARA CD24 CRYAB BIRC2	0	0	DN in EWS								0	0	DN in siEF	6310	DNA recombination	3.116e-05	19	873	0.021	BLM BCL11B LIG1 PRKDC XRCC2 LIG3 BRCA1 HMGB1 FANCB BRCA2 HSPD1 RAD51AP1 PSMC3IP RAD50 SLX4 EME1 EXO1 UBE2N RAD54L	0	0	UP in siEF&EEF	31988	membrane-bounded vesicle	3.6572e-06	110	1778	0.061	CHIC2 SPARC SERPINE2 GOLIM4 PLAT AMOT SCAMP5 CNST BSG PALM AP1S2 PDK1 IL15RA SERPINF1 ENTPD7 ADAM10 CYBA PDIA4 ADAM15 BIN1 SCN8A RIN3 ULK1 PPIB ATP6V0D1 OPTN STX1A CFD RAB5B STXBP1 TPRG1L ITPR1 PDGFA CORO1A HSP90B1 SYNGR1 PCSK1N SYNGR2 APH1B MYO6 BMF NPTX1 SEC31B VAT1 ABCA1 TGFB2 HSPA5 ABCA3 FN1 RAB27A IGF2R SYT7 EHD1 EHD3 BMP1 APPBP2 GIPC1 TPP1 ITGB1 CLIC4 SH3KBP1 DENND1A SLC2A1 ECE1 PCSK4 TMEM1…	0	0
UP in EWS	7610	behavior	0.000423	28	437	0.064	OPRD1 CXCL8 PDGFB PDGFA VLDLR PTGS2 SOBP AMOT EPS8 RAC2 CASP1 FYN S1PR2 CCN1 TAC1 DRD4 EPHA4 JUN MCOLN3 TGFB2 CCL20 ITGA1 FOS NGF NR4A2 IL1B FOSB PTX3	0	0	UP in siEF	22604	regulation of cell morphogenesis	2.1213e-05	31	1392	0.022	RTN4R NRP1 FBLIM1 TGFB1I1 SEMA3A SEMA3F CDH2 PALM SPP1 KDR FYN APOE LZTS1 PLXNA3 APC2 TGFB2 SMAD3 TNFRSF12A METRN FN1 ISLR2 NGF SMAD7 GREM1 EFNA1 CDC42EP3 CDC42EP1 PLXNB1 ULK1 RHOQ GAS7	0	0	DN in EWS								0	0	DN in siEF	43933	macromolecular complex subunit organization	3.6634e-05	66	873	0.075	AHCTF1 HJURP IL1RAP TTF2 PREX1 CHAF1B TUBA1B CHAF1A KNTC1 FBXO5 KPNA3 TP63 NDC1 HELLS SHPRH SYK ACTN2 WDR77 OLFM1 TCP1 GEMIN4 GEMIN5 KIF2C FKBP4 ASF1B MCM2 BLM NUP205 KCNA2 MACROH2A2 CENPA ACAT2 HSPD1 PARD6B CCNB1 TGS1 NACC1 E2F2 COX11 E2F3 PDSS1 TAF9B MDN1 RRM1 RRM2 BRF2 ABCA5 CAV1 FANCA FANCC MPP6 TICRR CENPE ANLN DIAPH1 CENPF KIF18A CENPH NASP UBE2S DLG4 CENPJ TSR1 TUBGCP4 TAF5 PFKM	0	0	UP in siEF&EEF	3779	actin binding	4.0192e-06	64	1778	0.035	WIPF2 AVIL FBXO25 TNC TRIOBP SYNE1 LASP1 CAPZB CFL2 TMSB4X ENC1 COTL1 PLS3 TMSB10 SNTA1 DST ACTN1 TPM2 TMOD2 TPM1 SHROOM3 ACTN4 DAAM1 DAAM2 PALLD MYH9 TLN2 PLEC GAS7 TAGLN PXK FLII TWF2 NEXN CAPG CORO1A CNN3 CNN2 EPB41L1 CALD1 CLMN MYO6 FLNB DMD WHAMM FLNC SVIL GSN HOMER2 MIB2 DSTN PARVA PARVB CORO2A FHDC1 AIF1L MYO1E MYO1B MARCKS FER FMNL2 GIPC1 JMY FXYD5	0	0
UP in EWS	33549	MAP kinase phosphatase activity	0.00044216	5	437	0.011	DUSP4 DUSP5 DUSP2 DUSP1 DUSP8	0	0	UP in siEF	10627	regulation of intracellular protein kinase cascade	2.5014e-05	52	1392	0.037	GOLT1B SLC44A2 SECTM1 LITAF AKAP12 TIMP2 LEPR MAP3K6 IL6R TGM2 IL11 DENND2B PLEKHG5 F2R MAPK8IP2 RHOC F3 MID1 DUSP6 TGFBR1 MAPK8IP1 CNKSR3 S100A4 SCG2 BIRC2 CD44 HBEGF BCL10 CXXC5 THBS1 FOXO1 SOCS1 ERBB2 S100A13 HMOX1 TCF7L2 TGFB2 NEK6 PLK2 LIF MIB2 SORBS3 BST2 PINK1 CLCF1 C18ORF32 PDCD4 SPRY2 SPRY1 ERCC6 CD24 MAP3K14	0	0	DN in EWS								0	0	DN in siEF	50789	regulation of biological process	4.0512e-05	389	873	0.445	RB1 POP1 RAX TMEM97 PREX1 PSMD3 MYB C3AR1 GTSE1 UNC5A DAPK1 PRKCB DDX11 RFX2 PASK ISL1 DKK2 WDR77 DEPDC1B PRKD1 ASF1B PIF1 SRCAP PRKDC CDCA7 THY1 SKA3 SKA2 C5 TERT ALX4 PPARGC1B NKX2-2 PLK4 FZD1 NGFR ABCA5 PLK1 NFATC3 NR0B1 PA2G4 FLI1 AGO2 REL STRN PLCH1 HOXD4 HOXD3 HOXD8 ZNF135 EZH2 RET HOXC12 GLI1 JPH1 ARHGAP4 CHAF1B CHAF1A SMPD1 DLGAP5 TCF19 HELLS ARG2 TEX15 BAZ1A PAX5 PAX7 TMSB15A PAX9 ZNF239…	0	0	UP in siEF&EEF	34330	cell junction organization	4.3376e-06	24	1778	0.013	LAMA5 NUMBL TGFB2 CXADR CD151 SMAD3 JUP ITGB4 LAMB2 ACTN1 LAMC1 AMOT SMAD7 PARD3 DLC1 CD9 ITGA6 ITGA5 TLN2 NF2 AJUBA VCL PLEC PDK1	0	0
UP in EWS	9612	response to mechanical stimulus	0.00044216	9	437	0.02	COL1A1 JUN ANGPT2 COL11A1 TXNIP FYN FOS NGF DCN	0	0	UP in siEF	30934	anchoring collagen	2.6447e-05	7	1392	0.005	COL16A1 COL7A1 COL6A1 COL12A1 COL6A3 COL9A3 COL9A2	0	0	DN in EWS								0	0	DN in siEF	5876	spindle microtubule	5.361e-05	10	873	0.011	KIF18A SPAG5 KIF4A BIRC5 TUBGCP3 KNTC1 CALM1 SKA3 AURKA SKA2	0	0	UP in siEF&EEF	71212	subsynaptic reticulum	4.6094e-06	116	1778	0.065	CLSTN3 PLOD3 ANTXR2 GBA2 FADS3 HHAT CREB3L4 CREB3L1 CREB3L2 ARL6IP5 CYP1B1 IL15RA SCARA3 ACSL1 SHISA5 TAP1 SHISA2 MAPK8IP3 ANK1 PDIA5 PDIA4 ERN1 CACNB1 DPM3 TMX3 CYP2U1 ASPHD1 CERCAM FKBP7 ASPHD2 KDELR2 KDELR3 PPIB ABCG1 RTN2 RTN1 H6PD SLC35D1 INSIG2 INSIG1 ITPR1 PLD1 SEZ6L2 PLD3 RTN4 HSP90B1 UBE2J1 UGCG SGPL1 RDH10 SERPINH1 SEC31B HSPA5 WFS1 EDEM2 SLC33A1 EPHX1 EIF2AK3 EXT2 RNF103 P4HA1 P4HA2 DN…	0	0
UP in EWS	10757	negative regulation of plasminogen activation	0.00044216	3	437	0.006	SERPINE2 SERPINE1 THBS1	0	0	UP in siEF	1763	morphogenesis of a branching structure	2.6447e-05	27	1392	0.019	NRP1 FOXC2 LAMA5 NOTCH3 DLX2 CSF1 SEMA3C SEMA3A CTSZ PDGFB SIX1 ADM SOCS3 EDNRA RDH10 KDR SOX9 NKX3-1 TGM2 EYA1 PGF TGFBR2 GREM1 MMP14 MGP SPRY2 CD44	0	0	DN in EWS								0	0	DN in siEF	6302	double-strand break repair	5.4885e-05	14	873	0.016	BLM FEN1 PRKDC XRCC2 BRCA1 FANCB BRCA2 RAD51AP1 POLA1 BRIP1 RAD50 SLX4 UBE2N RAD54L	0	0	UP in siEF&EEF	31410	cytoplasmic vesicle	5.0407e-06	112	1778	0.062	CHIC2 SPARC SERPINE2 GOLIM4 PLAT AMOT SCAMP5 CNST BSG PALM AP1S2 FAM3C PDK1 IL15RA SERPINF1 IGFBP2 ENTPD7 ADAM10 CYBA PDIA4 ADAM15 BIN1 SCN8A RIN3 ULK1 PPIB ATP6V0D1 OPTN STX1A CFD RAB5B STXBP1 TPRG1L ITPR1 PDGFA CORO1A HSP90B1 SYNGR1 PCSK1N SYNGR2 APH1B MYO6 BMF NPTX1 SEC31B VAT1 ABCA1 TGFB2 HSPA5 ABCA3 FN1 RAB27A IGF2R SYT7 EHD1 EHD3 APPBP2 GIPC1 TPP1 ITGB1 CLIC4 SH3KBP1 DENND1A SLC2A1 ECE1 PCS…	0	0
UP in EWS	12501	programmed cell death	0.00050626	32	437	0.073	PPP1R15A CSRNP1 TNFAIP3 BCL10 FOXO3 THBS1 BBC3 CECR2 DRAM1 APH1B CASP1 PHLDA1 IER3 BOK JUN GADD45B TNFRSF12A GADD45A TNFRSF18 NGF RHOB GULP1 GREM1 RNF144B RYBP IL1B DDIT4 ARHGEF3 PTPN6 TRIB3 PDCD1 MET	0	0	UP in siEF	65008	regulation of biological quality	2.726e-05	173	1392	0.124	OXTR CSF1 PROS1 AVIL SERPINE1 TNC PLAT AQP1 CXCL16 EFEMP2 EDNRA PLAU PALM ADORA1 KDR CYP1B1 SOX8 CCN1 LZTS1 SOX4 TGM2 PDGFRB CHRNB1 MYLIP CUBN LMO4 PRKCD TPM1 F2R ISLR2 CYBA BHLHA15 PDIA5 RRAGC DDIT3 SCN8A SERPING1 ULK1 NUPR1 KDELR3 SCG2 EPHA3 ABCG1 SLC22A4 NDRG4 SLC22A5 CRABP2 EPAS1 FBLIM1 PDGFB LTBP4 LPL CACNA1C FOXO3 PCSK1N BCL2L11 ATXN1 RDH10 MYO6 HMOX1 KCNMB4 APOE KCNN4 TAC1 PLXNA3 ABCA1 PRN…	0	0	DN in EWS								0	0	DN in siEF	5663	DNA replication factor C complex	6.3512e-05	5	873	0.005	RFC5 RFC3 PCNA RFC4 RFC2	0	0	UP in siEF&EEF	51789	response to protein stimulus	5.6964e-06	32	1778	0.017	PPP1R15A NR3C1 CLU HERPUD1 DNAJB2 DNAJB5 CREB3L4 CREB3L1 CREB3L2 SERPINH1 MSX1 CCN1 CTSB HSPA5 SPHK1 ITGA2 AMFR EDEM2 EIF2AK3 VASH1 HSPA2 MANF DNAJC3 ERN1 NR4A2 CREB3 ERP44 DDIT3 DNAJC4 ID1 ID3 BCL2L1	0	0
UP in EWS	51094	positive regulation of developmental process	0.00051619	23	437	0.052	KLF10 NRP1 JUN TGFB2 BTG1 ANGPT2 SERPINE2 TNFRSF12A ANXA3 SERPINE1 LIF ISLR2 VEGFC PTGS2 FOXO3 NGF HDAC9 ETS1 THBS1 RHOB AMOT IL1B BOC	0	0	UP in siEF	31099	regeneration	2.7531e-05	21	1392	0.015	PTPRU NOTCH3 GSN LAMB2 ANXA3 PTPRO SERPINE1 LIF PLAUR ADM TGFBR1 SOCS3 VCAN SOCS1 PLAU RTN4RL1 AXL NINJ1 CCL2 APOE CCN1	0	0	DN in EWS								0	0	DN in siEF	3697	single-stranded DNA binding	7.3863e-05	13	873	0.014	BLM MCM7 RAD23A HMGB1 FANCB BRCA2 HSPD1 RAD51AP1 PURB NEIL3 MCM4 MCM6 MCM2	0	0	UP in siEF&EEF	16023	cytoplasmic membrane-bounded vesicle	5.7524e-06	107	1778	0.06	CHIC2 SPARC SERPINE2 GOLIM4 PLAT AMOT SCAMP5 CNST BSG PALM AP1S2 PDK1 IL15RA SERPINF1 ENTPD7 ADAM10 CYBA PDIA4 ADAM15 BIN1 SCN8A RIN3 ULK1 PPIB ATP6V0D1 OPTN STX1A CFD RAB5B STXBP1 TPRG1L ITPR1 PDGFA CORO1A HSP90B1 SYNGR1 PCSK1N SYNGR2 APH1B MYO6 BMF NPTX1 SEC31B VAT1 ABCA1 TGFB2 HSPA5 ABCA3 FN1 RAB27A IGF2R SYT7 EHD1 EHD3 APPBP2 GIPC1 TPP1 ITGB1 CLIC4 SH3KBP1 DENND1A SLC2A1 ECE1 PCSK4 TMEM187 SL…	0	0
UP in EWS	45121	membrane raft	0.00051619	14	437	0.032	OPRD1 SDC4 PLLP RGS16 ITGA1 ITPR1 BCL10 PTGS2 HMOX1 CDH13 STOM DMD CD24 CD55	0	0	UP in siEF	23056	positive regulation of signaling process	2.7531e-05	47	1392	0.033	CSF1 GOLT1B SLC44A2 SECTM1 ECE1 BCL10 CXXC5 THBS1 LITAF AKAP12 ERBB2 LEPR S100A13 HMOX1 NCAM1 IL6R LMCD1 TGM2 IL11 TCF7L2 TGFB2 NEK6 PLK2 DENND2B PLEKHG5 F2R EIF2AK3 LIF MIB2 L1CAM MAPK8IP2 RHOC SORBS3 F3 MID1 REC8 TGFBR1 BST2 PINK1 CLCF1 C18ORF32 CDH13 S100A4 MAP3K14 BIRC2 CD44 HBEGF	0	0	DN in EWS								0	0	DN in siEF	51329	interphase of mitotic cell cycle	8.3499e-05	18	873	0.02	RB1 BLM CDCA5 DDX11 CDC25A POLA1 CENPF CCNB1 DBF4 CCND1 CDK4 POLD1 E2F1 BIRC5 RCC1 GTSE1 POLE CDKN3	0	0	UP in siEF&EEF	9790	embryonic development	6.3525e-06	101	1778	0.056	CELSR1 AMOT EDNRA ZMIZ1 CAPN2 SOX8 CCN1 SOX6 JUNB CDON ACVR1 LMO4 ADAM10 MAPK8IP3 BTD HOXB9 PRKAR1A DDIT3 HOXB4 HOXB3 HOXB2 ROR2 HOXB8 HOXB7 HOXB6 EPHA2 HOXB5 DLX1 NOTCH3 DLX2 CRABP2 TSHZ3 EPAS1 TSHZ1 PDGFA TWIST1 BCL10 FUT8 BCL2L11 CHST11 RDH10 MYO6 WNT3 TFAP2A TGFB2 SMAD3 FZD6 LIF PBX1 EFNA1 COL1A1 EXT2 GNAQ MAFF ID3 TPP1 NF2 BCL2L1 FGFR1 RARG BMPR2 LDB1 TGFB1I1 SIX1 ECE1 ADM SOBP PKD2 PKD1 GLI…	0	0
UP in EWS	7166	cell surface receptor linked signaling pathway	0.00053188	56	437	0.128	CSRNP1 FLT1 CXCL8 MAML2 CELSR3 EPS8 RSPO2 KDR RSPO3 ITGB8 CCN2 IL13RA1 KLF10 EPHA4 PDGFRA ITGA1 SORCS1 FOS NGF GEM IL1B TXNIP MET HBEGF TLR2 OPRD1 PTGER4 CD274 FOXC2 PDGFB PDGFA LY96 NEDD9 BCL10 FSTL1 GNAI1 SOCS1 APH1B IRAK2 STC2 S1PR1 FYN MSX1 S1PR2 TAC1 DRD4 JUN TGFB2 ANGPT2 ATRNL1 GDF15 FZD6 LIF F2RL1 PTPN6 CD24	0	0	UP in siEF	30055	cell-substrate junction	2.9677e-05	22	1392	0.015	ITGB5 SDC4 FBLIM1 ACTN1 TGFB1I1 FHL2 NTN4 NEXN NEDD9 PARVA PARVB LPP AIF1L PDLIM2 ZYX SDC1 DMD AJUBA LIMS2 BCAR1 PDLIM7 TNS2	0	0	DN in EWS								0	0	DN in siEF	48522	positive regulation of cellular process	8.8034e-05	143	873	0.163	RB1 CD83 POP1 RTKN2 RAX IRS2 TTF2 IKZF2 CDC20 SOX2 PREX1 CCND3 SALL1 PNP CCND1 BMPER CHEK2 PSMD3 C3AR1 EPC1 FBXO5 GTSE1 TP63 CADPS2 EPHA7 TIPIN DAPK1 PRKCB DDX11 USP2 UBE2E1 POU3F2 WDR77 UHMK1 TIAM1 DNA2 ANAPC1 CARD11 KMT2D BLM PSMD12 DNMT1 DLX5 PRKDC SLC1A3 ADRB1 THY1 PIK3R1 KALRN C5 CCNB1 INPP5D NACC1 NLRP2 ALX4 ECT2 NKX6-1 PPARGC1B NKX2-2 MAP2K6 PLK4 ESRRA NGFR EGR2 BCL11B ZBTB16 XRCC2 CAV1 PL…	0	0	UP in siEF&EEF	1666	response to hypoxia	7.0888e-06	37	1778	0.02	FLT1 EPAS1 SDC2 ITPR1 PDGFA ECE1 PLAT ABAT ADM VLDLR APOLD1 HSP90B1 SLC2A8 EDNRA PIM1 CAPN2 HMOX1 TGFB2 SMAD3 ITGA2 BNIP3 MMP2 ACTN4 ATP1B1 PGF TGFBR1 VEGFA NR4A2 MMP14 ADAM17 DDIT4 HYOU1 ALDOC PPARA CD24 BIRC2 BCL2L1	0	0
UP in EWS	14070	response to organic cyclic substance	0.00054464	14	437	0.032	JUN ANGPT2 PDGFB FOS PTGS2 NGF IL1B CYP1A1 CASP1 HMOX1 PLIN2 CCN2 TAC1 DRD4	0	0	UP in siEF	35468	positive regulation of signaling pathway	3.2972e-05	58	1392	0.041	FLT1 CSF1 GOLT1B SLC44A2 TGFB1I1 SECTM1 ECE1 LITAF AKAP12 LEPR IL6R LMCD1 SOX4 TGM2 IL11 DENND2B PLEKHG5 TMOD2 F2R MAPK8IP2 RHOC F3 MID1 TGFBR1 EREG CDH13 S100A4 SCG2 BIRC2 CD44 HBEGF PDGFB BCL10 CXXC5 THBS1 ERBB2 S100A13 HMOX1 NCAM1 TCF7L2 TGFB2 SMAD3 JUP RBPMS PRRX1 NEK6 PLK2 LIF MIB2 L1CAM SORBS3 REC8 BST2 PINK1 CLCF1 GIPC1 C18ORF32 MAP3K14	0	0	DN in EWS								0	0	DN in siEF	940	outer kinetochore of condensed chromosome	9.2661e-05	6	873	0.006	CENPF CCNB1 PLK1 BUB1B SKA3 SKA2	0	0	UP in siEF&EEF	30182	neuron differentiation	7.0888e-06	80	1778	0.044	CDKN1C ROBO2 NRP1 NRP2 LDB1 RORA ADM LAMC1 CLU CELSR3 GLI2 ALCAM KIF5C NEFL NRCAM EPHA4 WNT5B UNC5B ITGA1 DAPK3 UNC5C PRKCA MAPK8IP3 TGFBR1 VCAN RTN4RL1 PARD3 ULK2 B3GNT2 ROR1 ULK1 ROR2 CHST3 GAS7 EPHA2 RTN4R DLX1 NOTCH3 DLX2 NUMBL RTN1 BRI3 SDC2 STXBP1 SEMA3A SEMA3B EFNA5 CLN5 EFNB3 MYO6 PSAP ERBB2 GPC2 DMD STX3 APOE WNT3 PLXNA3 MCOLN3 TGFB2 FZD2 FZD5 LAMB2 FZD7 LIF FZD8 LAMB1 L1CAM DCLK1 VEGFA …	0	0
UP in EWS	22603	regulation of anatomical structure morphogenesis	0.00054464	21	437	0.048	NRP1 TGFB2 BTG1 ANGPT2 TNFRSF12A ANXA3 SERPINE1 PDGFA ISLR2 PTGS2 NGF HDAC9 THBS1 ASPN RHOB AMOT GREM1 IL1B KDR HMOX1 FYN	0	0	UP in siEF	5783	endoplasmic reticulum	3.5008e-05	123	1392	0.088	SLC27A1 GOLT1B CLSTN3 PLOD3 ANTXR2 ZFYVE1 FADS3 HHAT CREB3L1 CREB3L2 ADORA1 CYP1B1 TMEM8B IL15RA CUBN RSAD2 ACSL1 PRKCD FNDC3B P3H1 CNPY2 VASH1 SHISA2 ANK1 MR1 PDIA5 CACNB1 CH25H CYP2U1 ASPHD1 CERCAM FKBP7 ASPHD2 FKBP9 KDELR3 PPIB RNF122 ABCG1 RTN4R RTN2 RTN1 INSIG2 INSIG1 PLD1 SEZ6L2 PLD3 UGCG SGPL1 PDZD2 RDH10 HMOX1 ARSI SEC31B NTSR1 CTSA PRNP SDF2L1 HSPA5 WFS1 TMEM50B TRAPPC5 EDEM2 SLC33A1 EPH…	0	0	DN in EWS								0	0	DN in siEF	8094	DNA-dependent ATPase activity	9.2967e-05	12	873	0.013	RFC5 TOP2A PIF1 BLM BRIP1 RFC3 RFC4 RFC2 XRCC2 DDX11 TTF2 DNA2	0	0	UP in siEF&EEF	40017	positive regulation of locomotion	7.1485e-06	35	1778	0.019	COL18A1 BMPR2 FLT1 CXCL8 CSF1 PDGFA FURIN PLD1 PTGS2 CORO1A AMOT CXCL16 PODXL PDPN IL6R TGFB2 SMAD3 WNT5B ANXA3 SPHK1 ITGA2 F2R VEGFC ADAM10 RRAS2 PRKCA LAMB1 F3 VEGFA CREB3 ADAM17 F2RL1 ROR2 BCAR1 HBEGF	0	0
UP in EWS	31093	platelet alpha granule lumen	0.00054464	7	437	0.016	TGFB2 PDGFB SERPING1 PDGFA VEGFC A2M THBS1	0	0	UP in siEF	1503	ossification	3.6833e-05	26	1392	0.018	FOXC2 FOXC1 SPARC TUFT1 PTN PTGS2 FSTL3 CTSO GPNMB SPP1 SOX8 CCN2 OSTF1 PDLIM7 SMAD3 MMP2 EIF2AK3 ASPN RUNX2 COL1A1 MMP14 COL2A1 BMP1 MGP COL5A2 SCG2	0	0	DN in EWS								0	0	DN in siEF	51327	M phase of meiotic cell cycle	9.2967e-05	18	873	0.02	XRCC2 FANCA LIG3 TEX15 FANCB FBXO43 BRCA2 SMC1A MKI67 PSMC3IP SGO1 RAD50 ESPL1 EXO1 FANCD2 RAD54L FBXO5 MNS1	0	0	UP in siEF&EEF	45595	regulation of cell differentiation	7.6391e-06	94	1778	0.052	ROBO2 NRP1 ERRFI1 BTG1 BMPR2 B4GALT1 LDB1 CSF1 SERPINE2 TGFB1I1 SIX1 CLU PTPRG GLI2 ZFP36 CDH2 BOC SH3PXD2B NCS1 TIMP2 NEFL NEFM ITGAV NRCAM SOX8 SOX9 IL6R JUNB APC2 ACVR1 IL4R WNT5B TNFRSF12A DYNLT1 METRN SPHK1 SERPINF1 CTNNBIP1 FNDC3B TGFBR1 TGFBR2 ZEB1 TEP1 ULK1 ZNF358 PPARA TRIB2 ABCG1 RTN4R DLX1 NOTCH3 DLX2 NUMBL TSHZ3 BRI3 SEMA3A LTBP4 TWIST1 FOXO4 SEMA3F FOXO3 APOLD1 RTN4 FSTL3 ERBB2 HSF4 …	0	0
UP in EWS	32570	response to progesterone stimulus	0.00055561	6	437	0.013	TGFB2 SOCS1 TXNIP FOS THBS1 TLR2	0	0	UP in siEF	30016	myofibril	3.749e-05	25	1392	0.017	MYOM1 SYNM SDC4 TNC FHL2 NEXN CACNA1C MYPN JPH2 CALD1 ANKRD1 DMD FLNC CCN1 SVIL JUP LMO4 ACTN1 TPM2 MMP2 TPM1 ANK1 CRYAB TRIM54 OBSL1	0	0	DN in EWS								0	0	DN in siEF	7126	meiosis	9.2967e-05	18	873	0.02	XRCC2 FANCA LIG3 TEX15 FANCB FBXO43 BRCA2 SMC1A MKI67 PSMC3IP SGO1 RAD50 ESPL1 EXO1 FANCD2 RAD54L FBXO5 MNS1	0	0	UP in siEF&EEF	44431	Golgi apparatus part	7.7114e-06	92	1778	0.051	GPSM1 B4GALT1 TMEM167B CHPF RNF13 GOLT1B CLSTN3 GOLIM4 CBY1 PIK3CD PCSK6 RND3 ZFYVE1 GALNT10 SCAMP5 GOLGA2 CNST CREB3L4 GLIPR2 BSG NCS1 AP1S2 TMED2 QSOX1 APC2 RHBDF1 SH3GLB1 IL15RA SCARA3 CHPF2 ENTPD6 PAQR3 ADAM10 WIPI1 HLA-A ARFGAP3 IL17RD MAPK8IP3 PJA2 BET1L CLIP3 TPST1 GOLGA8B CREB3 RAB30 RAB31 PITPNM1 RAB36 B3GNT2 ST6GALNAC4 CHST2 ABCG1 B4GALT4 CHST3 ARL3 FUT11 TMEM59L FURIN SGMS2 RFNG PLD1 F…	0	0
UP in EWS	31328	positive regulation of cellular biosynthetic process	0.00056419	37	437	0.084	CSRNP1 FOXC2 MAML2 EPAS1 CEBPG EBI3 CITED4 PDGFB GLIS3 PDGFA BCL10 PTGS2 FOXO3 ETS1 THBS1 ICAM1 ARNTL HMOX1 SOX8 MSX1 CCN1 PDGFRA JUN MPP4 LIF FOS NR4A2 HOXB9 KLF5 DDIT3 IL1B IRF1 BCL3 PTX3 TLR3 TLR2 CREB5	0	0	UP in siEF	7167	enzyme linked receptor protein signaling pathway	3.7714e-05	54	1392	0.038	PTPRU FLT1 TGFB1I1 PTPRO PLAT PTPRJ FGF1 PTPRG EPS8 KDR NCK2 CCN2 PDGFRB EPHA4 PDGFRA ARID5B MAPK8IP2 NGF TGFBR1 EREG TGFBR2 TGFBR3 TXNIP ROR2 EPHA3 RHOQ HBEGF FOXC2 FOXC1 PDGFB PDGFA PIK3R3 PTN LTBP3 FSTL1 FOXO1 SGPL1 PDGFC ERBB2 CCL2 MPZL1 JUN TGFB2 SMAD3 GDF15 EIF2AK3 LIF SMAD7 EFNA1 MYO1E COL3A1 COL1A2 AXL BCAR1	0	0	DN in EWS								0	0	DN in siEF	51321	meiotic cell cycle	0.00010653	18	873	0.02	XRCC2 FANCA LIG3 TEX15 FANCB FBXO43 BRCA2 SMC1A MKI67 PSMC3IP SGO1 RAD50 ESPL1 EXO1 FANCD2 RAD54L FBXO5 MNS1	0	0	UP in siEF&EEF	10627	regulation of intracellular protein kinase cascade	8.3594e-06	63	1778	0.035	TRAF3IP2 GOLT1B SLC44A2 TRADD LITAF AKAP12 TIMP2 LEPR CIR1 MAP3K6 IL6R MAP3K5 TGM2 PHLDA3 DENND2B PLEKHG5 F2R SHISA5 TRAF1 MAPK8IP2 RHOC MAPK8IP3 F3 MID1 TGFBR1 MAPK8IP1 TEP1 CNKSR3 SQSTM1 BIRC2 HBEGF NOD1 BCL10 CXXC5 FOXO1 TSPAN6 ERBB2 S100A13 HMOX1 TCF7L2 TGFB2 MAP3K1 NEK6 PLK2 CARD9 LIF MIB2 SORBS3 HIPK2 PINK1 C18ORF32 ID1 PDCD4 MAP3K10 SPRY2 SPRY1 ERCC6 NF2 CD24 MAP3K14 TMEM9B MYD88 FGFR1	0	0
UP in EWS	30282	bone mineralization	0.00059687	5	437	0.011	KLF10 GPNMB TUFT1 PTGS2 ASPN	0	0	UP in siEF	22008	neurogenesis	3.7714e-05	85	1392	0.061	NRP1 SPON2 PCSK1 LDB1 SERPINE2 SIX1 RORA ADM CELSR3 PTPRG ALCAM CDH2 KIF5C TUBB3 TIMP2 SOX8 SOX9 LZTS1 APC2 EPHA4 PDGFRA WNT5B TNFRSF12A UNC5B METRN SPHK1 ISLR2 UNC5C NGF TGFBR1 MMP14 VCAN RTN4RL1 S100A6 ULK2 ULK1 ROR2 CD44 GAS7 RTN4R NOTCH3 DLX2 RTN1 C1S BRI3 SDC2 SEMA3A NTM SEMA3B NTN4 DTX1 SEMA3F EFNA5 MAP2 MYO6 PSAP ERBB2 SPP1 FYN DMD TSPAN2 APOE WNT3 PLXNA3 MCOLN3 TGFB2 GSN FZD2 EYA1 FZD5 LA…	0	0	DN in EWS								0	0	DN in siEF	48518	positive regulation of biological process	0.00011918	154	873	0.176	RB1 CD83 POP1 RTKN2 RAX IRS2 TTF2 IKZF2 CDC20 SOX2 PREX1 CCND3 SALL1 PNP CCND1 BMPER CHEK2 PSMD3 C3AR1 EPC1 FBXO5 GTSE1 TP63 CADPS2 EPHA7 TIPIN DAPK1 PRKCB DDX11 USP2 UBE2E1 NPY1R POU3F1 PASK POU3F2 WDR77 UHMK1 TIAM1 TIMELESS DNA2 ANAPC1 CARD11 KMT2D BLM CPB2 PSMD12 DNMT1 DLX5 PRKDC ARX SLC1A3 ADRB1 THY1 PIK3R1 KALRN CD79A C5 CCNB1 INPP5D NACC1 NLRP2 ALX4 ECT2 NKX6-1 PPARGC1B NKX2-2 MAP2K6 PLK4 E…	0	0	UP in siEF&EEF	48568	embryonic organ development	9.9499e-06	47	1778	0.026	DLX2 RARG EPAS1 SATB2 TSHZ1 SIX1 ADM SOBP PKD2 GLI2 SIX4 CHST11 RDH10 MYO6 CCN1 JUNB NKX3-2 TBX1 TFAP2A TCF7L2 SMAD3 ITGA4 EYA1 PRRX1 FZD6 LIF PBX1 TGFBR1 VEGFA TGFBR2 EFNA1 ZEB1 COL2A1 DDIT3 HOXB4 ID3 HOXB3 SPRY2 HOXB2 ROR2 HOXB8 PLCD3 HOXB7 HOXB6 FGFR1 EPHA2 HOXB5	0	0
UP in EWS	5178	integrin binding	0.00060848	9	437	0.02	VCAM1 GPNMB ITGA1 TIMP2 KDR CCN2 THBS1 FBLN5 ICAM1	0	0	UP in siEF	9967	positive regulation of signal transduction	3.7714e-05	46	1392	0.033	CSF1 GOLT1B SLC44A2 SECTM1 BCL10 CXXC5 THBS1 LITAF AKAP12 ERBB2 LEPR S100A13 HMOX1 NCAM1 IL6R LMCD1 TGM2 IL11 TCF7L2 TGFB2 NEK6 PLK2 DENND2B PLEKHG5 F2R EIF2AK3 LIF MIB2 L1CAM MAPK8IP2 RHOC SORBS3 F3 MID1 REC8 TGFBR1 BST2 PINK1 CLCF1 C18ORF32 CDH13 S100A4 MAP3K14 BIRC2 CD44 HBEGF	0	0	DN in EWS								0	0	DN in siEF	65007	biological regulation	0.00012762	405	873	0.463	RB1 POP1 RAX TMEM97 CLDN1 PREX1 PSMD3 MYB C3AR1 GTSE1 UNC5A DAPK1 PRKCB DDX11 RFX2 PASK ISL1 DKK2 WDR77 DEPDC1B PRKD1 ASF1B PIF1 SRCAP PRKDC CDCA7 THY1 SKA3 SKA2 C5 TERT ALX4 PPARGC1B NKX2-2 PLK4 FZD1 NGFR SNAPIN ABCA5 PLK1 NFATC3 NR0B1 PA2G4 FLI1 AGO2 REL SFXN1 STRN PLCH1 HOXD4 HOXD3 HOXD8 ZNF135 EZH2 RET HOXC12 GLI1 JPH1 ARHGAP4 CHAF1B CHAF1A SMPD1 DLGAP5 CHST8 TCF19 HELLS ARG2 TEX15 BAZ1A PAX5…	0	0	UP in siEF&EEF	44432	endoplasmic reticulum part	1.0519e-05	110	1778	0.061	CLSTN3 PLOD3 ANTXR2 FADS3 HHAT CREB3L4 CREB3L1 CREB3L2 ARL6IP5 CYP1B1 IL15RA SCARA3 ACSL1 SHISA5 TAP1 SHISA2 PDIA5 PDIA4 ERN1 DPM3 TMX3 CYP2U1 ASPHD1 CERCAM FKBP7 ASPHD2 KDELR2 KDELR3 PPIB ABCG1 RTN2 RTN1 H6PD SLC35D1 INSIG2 INSIG1 ITPR1 PLD1 SEZ6L2 PLD3 RTN4 HSP90B1 UBE2J1 UGCG SGPL1 RDH10 SERPINH1 SEC31B HSPA5 WFS1 EDEM2 SLC33A1 EPHX1 EIF2AK3 EXT2 RNF103 P4HA1 P4HA2 DNAJC10 HYOU1 SERINC1 GPSM1 …	0	0
UP in EWS	16477	cell migration	0.00061849	20	437	0.045	NRP1 TGFB2 BTG1 VCAM1 CXCL8 TNFRSF12A ITGA1 PDGFB VEGFC THBS1 ICAM1 AMOT NR4A2 SDCBP IL1B CDH13 FYN CCN2 CD24 CTHRC1	0	0	UP in siEF	60348	bone development	3.7989e-05	28	1392	0.02	FOXC2 FOXC1 SPARC TUFT1 LRRC17 PTN PTGS2 FSTL3 CTSO GPNMB SPP1 SOX8 CCN2 OSTF1 SOX9 PDLIM7 SMAD3 MMP2 EIF2AK3 ASPN RUNX2 COL1A1 MMP14 COL2A1 BMP1 MGP COL5A2 SCG2	0	0	DN in EWS								0	0	DN in siEF	4386	helicase activity	0.00013708	21	873	0.024	PIF1 HELLS BLM ERCC6L SHPRH SRCAP FANCM MCM7 DDX11 DDX54 DDX21 TTF2 BRIP1 DHX33 HLTF DHX37 MCM4 RAD54L MCM6 DNA2 MCM2	0	0	UP in siEF&EEF	5924	cell-substrate adherens junction	1.1049e-05	25	1778	0.014	TES ITGB5 SDC4 FBLIM1 SH3KBP1 TGFB1I1 FHL2 NEXN LPP LASP1 PDLIM7 TNS2 ITGA2 ACTN1 PARVA PARVB AIF1L ARHGAP31 DLC1 ZYX SDC1 TLN2 AJUBA BCAR1 VCL	0	0
UP in EWS	5021	vascular endothelial growth factor receptor activity	0.00062858	4	437	0.009	NRP1 PDGFRA FLT1 KDR	0	0	UP in siEF	5924	cell-substrate adherens junction	3.9543e-05	21	1392	0.015	ITGB5 SDC4 FBLIM1 ACTN1 TGFB1I1 FHL2 NTN4 NEXN NEDD9 PARVA PARVB LPP AIF1L PDLIM2 ZYX SDC1 AJUBA LIMS2 BCAR1 PDLIM7 TNS2	0	0	DN in EWS								0	0	DN in siEF	51325	interphase	0.00013708	18	873	0.02	RB1 BLM CDCA5 DDX11 CDC25A POLA1 CENPF CCNB1 DBF4 CCND1 CDK4 POLD1 E2F1 BIRC5 RCC1 GTSE1 POLE CDKN3	0	0	UP in siEF&EEF	9986	cell surface	1.117e-05	65	1778	0.036	ITGB1 ROBO2 CLIC4 BMPR2 B4GALT1 SERPINE2 ECE1 PLAT PCSK6 PVR AMOT TMEM102 ALCAM TIMP2 ITGAV NRCAM IL6R TMEM8B CTSB CDON ITGA4 TNFRSF12A ITGA2 ITGA1 ENTPD6 PLAUR ADAM10 F3 RGMA TGFBR2 TGFBR3 ADAM17 BCAM MMP16 ADORA2B RTN4RL1 ITGA6 ITGA5 MFGE8 ABCG1 HBEGF NOTCH3 SDC4 PDGFA FURIN SCUBE3 IRAK2 DMD CD59 NCAM1 APOE LDLR MICA CD276 HSPA5 HSPA2 L1CAM SULF1 IGF2R DCBLD2 VEGFA SDC1 CSPG4 AGRN ULBP2	0	0
UP in EWS	60205	cytoplasmic membrane-bounded vesicle lumen	0.00062858	7	437	0.016	TGFB2 PDGFB SERPING1 PDGFA VEGFC A2M THBS1	0	0	UP in siEF	7229	integrin-mediated signaling pathway	4.2227e-05	17	1392	0.012	LAMA5 COL16A1 ITGB5 ITGA4 ITGB4 ITGA3 NEDD9 COL3A1 CEACAM1 ITGA10 ITGA11 ITGB8 ITGBL1 ITGAV ITGA6 CCN2 BCAR1	0	0	DN in EWS								0	0	DN in siEF	32886	regulation of microtubule-based process	0.00014083	12	873	0.013	PLK4 CENPE TPX2 CCNB1 BORA CAV1 CCNF TACC3 BRCA1 SKA3 FKBP4 SKA2	0	0	UP in siEF&EEF	48562	embryonic organ morphogenesis	1.1913e-05	35	1778	0.019	DLX2 RARG SATB2 TSHZ1 SIX1 SOBP GLI2 SIX4 CHST11 RDH10 MYO6 NKX3-2 TBX1 TFAP2A TCF7L2 SMAD3 EYA1 PRRX1 FZD6 TGFBR1 TGFBR2 EFNA1 ZEB1 COL2A1 HOXB4 HOXB3 SPRY2 HOXB2 ROR2 HOXB8 HOXB7 HOXB6 FGFR1 EPHA2 HOXB5	0	0
UP in EWS	43627	response to estrogen stimulus	0.00064517	12	437	0.027	PDGFRA SOCS1 DUSP1 IL1B PDGFB TXNIP PDGFA HMOX1 CCN2 PTGS2 CCN1 CD24	0	0	UP in siEF	50840	extracellular matrix binding	4.9595e-05	12	1392	0.008	BCAM SPARC COL11A1 BGN SPP1 NTN4 ITGA6 TGFBI OLFML2A CCN1 NID1 THBS1	0	0	DN in EWS								0	0	DN in siEF	70507	regulation of microtubule cytoskeleton organization	0.00014083	11	873	0.012	PLK4 CENPE TPX2 CCNB1 BORA CAV1 CCNF BRCA1 SKA3 FKBP4 SKA2	0	0	UP in siEF&EEF	30335	positive regulation of cell migration	1.1959e-05	33	1778	0.018	COL18A1 BMPR2 FLT1 CSF1 PDGFA FURIN PLD1 PTGS2 CORO1A AMOT CXCL16 PODXL PDPN IL6R TGFB2 SMAD3 WNT5B ANXA3 SPHK1 ITGA2 F2R VEGFC ADAM10 RRAS2 LAMB1 F3 VEGFA CREB3 ADAM17 F2RL1 ROR2 BCAR1 HBEGF	0	0
UP in EWS	51241	negative regulation of multicellular organismal process	0.00071685	15	437	0.034	CXADR SERPINE2 SERPINE1 PDGFB PDGFA IL20RB ADM PTGS2 THBS1 ASPN KLF2 TNNT1 HMOX1 CD24 TAC1	0	0	UP in siEF	31225	anchored to membrane	5.0902e-05	28	1392	0.02	RTN4R CPM SEMA7A NTM LPL EFNA5 NT5E GPC1 CD59 NCAM1 GPC6 CD55 PRNP PLAUR F3 RGMA BST2 EFNA1 BST1 RTN4RL1 LYPD6B MMP17 ALPL CDH13 CD24 RECK MDGA1 ULBP3	0	0	DN in EWS								0	0	DN in siEF	6950	response to stress	0.00015912	128	873	0.146	DCLRE1B SLC23A2 DCLRE1A PGLYRP2 CD83 RIF1 POP1 NUDT1 BCCIP RAX IL1RAP ALKBH8 SOX2 CCND1 PTTG1 EME1 CHEK2 C3AR1 GTSE1 MAP3K4 TP63 TIPIN LIG1 LIG3 ESCO2 KMO PASK SCNN1G NEIL3 FANCD2 SCNN1B TIMELESS DNA2 NPTXR DGKK BLM CPB2 PRKDC SLC1A3 ADRB1 HIGD1A RAD51AP1 C5 BRIP1 CCNB1 HSPH1 CLSPN MAP2K6 FANCI NGFR TRAP1 HSPA8 FANCM XRCC2 CAV1 PLK1 NFATC3 FANCA DCDC2 NR0B1 FANCC IGF1 FANCB FANCG IGSF10 POLA1 UBE…	0	0	UP in siEF&EEF	48858	cell projection morphogenesis	1.8297e-05	49	1778	0.027	ROBO2 NRP1 NRP2 CBY1 ADM CLU CELSR3 GLI2 ALCAM KIF5C NEFL NRCAM EPHA4 UNC5B ITGA1 UNC5C PRKCA MAPK8IP3 VCAN RTN4RL1 PARD3 ULK2 B3GNT2 ULK1 CHST3 GAS7 RTN4R LAMA5 NUMBL SDC2 STXBP1 SEMA3A SEMA3B EFNA5 EFNB3 TMEM67 ERBB2 DMD APOE PLXNA3 BBS2 WWTR1 LAMB2 L1CAM DCLK1 NR4A2 KLF7 RIT1 TTLL3	0	0
UP in EWS	48869	cellular developmental process	0.00073852	69	437	0.157	NRP1 FLT1 SERPINE2 FHL1 TNFAIP2 ADM F11R CELSR3 AMOT TGM1 KIF5C TIMP2 KDR CASP1 SOX8 CCN2 CCN1 EPHA4 PDGFRA CXADR TNFRSF12A ITGA1 ISLR2 NGF NPNT DKK1 RHOB IRF1 TXNIP MMP19 INA FOXC2 SLFN5 BEX2 CSTA NDRG4 RTN1 EPAS1 LAMA4 SEMA3B CEBPG FOXO3 HDAC9 APOLD1 SOCS1 GPNMB FRZB DMD FYN TSPAN2 STX3 MSX1 JUN MCOLN3 TGFB2 ANGPT2 VCAM1 TXNRD3 GADD45B LIF VEGFC KLF4 COL1A1 NR4A2 RCAN1 SNRK BCL3 CYP1A1 PTX3	0	0	UP in siEF	35295	tube development	5.244e-05	48	1392	0.034	NRP1 ERRFI1 FOXC2 LAMA5 NOTCH3 FOXC1 SDC4 CSF1 TSHZ3 EPAS1 CTSZ PDGFA SIX1 ADM BCL10 CELSR1 FGF1 EDNRA BCL2L11 PODXL RDH10 KDR APOE CCN2 NKX3-1 TGM2 PDGFRA SMAD3 EYA1 LMO4 FZD6 LIF PGF TGFBR1 RGMA SMAD7 TGFBR2 GREM1 ACTA2 MMP14 LOX ADORA2B MGP SDC1 SPRY2 SPRY1 LGR4 CD44	0	0	DN in EWS								0	0	DN in siEF	34061	DNA polymerase activity	0.00016192	10	873	0.011	POLD3 POLA1 POLQ MYBBP1A TERT DKC1 POLD1 POLE2 ESCO2 POLE	0	0	UP in siEF&EEF	7167	enzyme linked receptor protein signaling pathway	1.8748e-05	65	1778	0.036	DDR1 ARF4 PTPRU BMPR2 FLT1 TRIO TGFB1I1 PLAT PTPRJ PTPRG SLC2A8 EPS8 RPS6KA5 NCK2 CAST ACVR1 EPHA4 ARID5B MAPK8IP2 RGMB FRS3 TGFBR1 TGFBR2 TGFBR3 ADAM17 TEP1 TXNIP ROR1 ROR2 EPHA3 RHOQ EPHA2 HBEGF FOXC1 PDGFA PIK3R3 FOXO4 LTBP3 FSTL1 FOXO1 FUT8 SGPL1 EFNB3 PDGFC ERBB2 MSX1 MPZL1 JUN TGFB2 MAP3K1 SMAD3 SMURF2 GDF15 EIF2AK3 LIF VEGFA HIPK2 SMAD7 EFNA1 MYO1E ID1 AGRN FGFR3 BCAR1 FGFR1	0	0
UP in EWS	51173	positive regulation of nitrogen compound metabolic process	0.00078669	35	437	0.08	CSRNP1 FOXC2 MAML2 EPAS1 CEBPG CITED4 PDGFB GLIS3 PDGFA BCL10 PTGS2 FOXO3 ETS1 ICAM1 ARNTL SOX8 MSX1 CCN1 PDGFRA JUN MPP4 ANXA3 LIF FOS NR4A2 HOXB9 KLF5 DDIT3 IL1B IRF1 BCL3 PTX3 TLR3 TLR2 CREB5	0	0	UP in siEF	51128	regulation of cellular component organization	5.9278e-05	74	1392	0.053	NRP1 OXTR AVIL TGFB1I1 SERPINE1 STON1 STON2 AHR TRIOBP PTPRG SCAMP5 CDH2 TMSB4X PALM KDR NCK2 SYNPO LZTS1 APC2 TNFRSF12A ANXA2 METRN SPHK1 TPM1 SHROOM2 ISLR2 NGF MID1 TGFBR1 EREG GREM1 MMP14 CDC42EP3 CDH13 CDC42EP1 ULK1 MFGE8 TRIM54 SCG2 RHOQ GAS7 RTN4R CD63 SDC4 FBLIM1 BRI3 SEMA3A PDGFA NEXN SEMA3F THBS1 DNAJB2 CST3 MAP2 PODXL SPP1 FYN APOE TAC1 PLXNA3 TGFB2 GSN SMAD3 NEK6 FN1 SORBS3 SMAD7 EFNA1…	0	0	DN in EWS								0	0	DN in siEF	6323	DNA packaging	0.00016211	19	873	0.021	TOP2A HELLS SHPRH CDCA5 NCAPG2 CAD HJURP NCAPG MACROH2A2 CENPA SMC4 NCAPH SMC2 CHAF1B CHAF1A NCAPD2 NCAPD3 ASF1B MCM2	0	0	UP in siEF&EEF	5925	focal adhesion	1.9732e-05	24	1778	0.013	TES ITGB5 SDC4 FBLIM1 SH3KBP1 ITGA2 ACTN1 TGFB1I1 FHL2 PARVA PARVB LPP AIF1L LASP1 ARHGAP31 DLC1 ZYX SDC1 TLN2 AJUBA BCAR1 VCL PDLIM7 TNS2	0	0
UP in EWS	9991	response to extracellular stimulus	0.0008068	19	437	0.043	HRK JUN VCAM1 DUSP1 PDGFA ADM FOS VLDLR PTGS2 COL1A1 NR4A2 NUAK2 DDIT3 STC2 IL1B HSD17B2 CYP1A1 HMOX1 A2M	0	0	UP in siEF	2682	regulation of immune system process	6.0031e-05	62	1392	0.044	LDB1 CSF1 FHL1 SERPINE1 CBLB RORA ETS1 ICAM1 IL27RA ADORA1 NCK2 IL6R IL13RA1 IL4R LMO2 GAB2 PDCD1LG2 EREG TGFBR2 GREM1 GAL ZEB1 ADORA2B SERPING1 ROR2 CD44 CFD CD274 C1S C1R UNC93B1 LRRC17 EBI3 BCL10 FOXO3 SAMHD1 THBS1 FSTL3 IRAK2 ERBB2 HMOX1 CCL2 TNFRSF14 FYN A2M TAC1 CD55 JUN TGFB2 APOBEC3F SMAD3 APOBEC3G BAD LIF VEGFC COL3A1 CDK6 TNFSF4 F2RL1 IL7R CD24 BCAR1	0	0	DN in EWS								0	0	DN in siEF	34508	centromere complex assembly	0.00018658	5	873	0.005	CENPE HELLS CENPF HJURP CENPA	0	0	UP in siEF&EEF	40011	locomotion	1.9831e-05	78	1778	0.043	ITGB1 ROBO2 NRP1 NRP2 BTG1 B4GALT1 CXCL8 CD81 SIX1 PLAT LAMC1 LYST PVR AMOT CXCL16 SIX4 CDH2 NCK2 NEFL NRCAM CCN1 IL6R ACVR1 ITGA4 TNFRSF12A ITGA1 PLAUR RFX3 ARID5B NAV1 PRKCA TGFBR1 TGFBR3 CREB3 MMP14 ADAM17 VCAN TEP1 MYH9 ITGA6 ULK1 ITGA5 AJUBA LAMA5 FOXC1 SEMA3C SATB2 PDGFA TWIST1 SEMA3F PLD1 CORO1A FUT8 SGPL1 PODXL FYN PLXNA3 TGFB2 JUP CMTM3 LAMB2 FN1 VEGFC GRIN2C DCLK1 VEGFA FOSL1 NR4A2 KITL…	0	0
UP in EWS	31091	platelet alpha granule	0.00081589	8	437	0.018	TGFB2 SERPINE2 PDGFB SERPING1 PDGFA VEGFC A2M THBS1	0	0	UP in siEF	31960	response to corticosteroid stimulus	6.0472e-05	24	1392	0.017	PCSK1 PTPRU ANXA3 GPX3 PTPRO SERPINE1 IGFBP2 LCAT PLAT ADM PTGS2 NGF ASS1 AQP1 FOSL1 COL1A1 SOCS3 SDC1 ALPL CCL2 IGFBP7 CCN2 A2M IL6R	0	0	DN in EWS								0	0	DN in siEF	48478	replication fork protection	0.00019569	4	873	0.004	BLM TIPIN FANCB BRCA2	0	0	UP in siEF&EEF	904	cell morphogenesis involved in differentiation	2.0951e-05	50	1778	0.028	ROBO2 NRP1 COL18A1 NRP2 LAMC1 CELSR3 GLI2 ALCAM KIF5C NEFL NRCAM SOX9 EPHA4 UNC5B UNC5C PRKCA MAPK8IP3 TGFBR3 VCAN RTN4RL1 PARD3 MYH9 ULK2 B3GNT2 ULK1 CHST3 RTN4R LAMA5 NOTCH3 NUMBL SDC2 STXBP1 SEMA3A SEMA3B EFNA5 EFNB3 ERBB2 APOE MSX1 PLXNA3 TGFB2 LAMB2 FN1 LAMB1 L1CAM DCLK1 NR4A2 KLF7 RIT1 ID1	0	0
UP in EWS	31983	vesicle lumen	0.00086716	7	437	0.016	TGFB2 PDGFB SERPING1 PDGFA VEGFC A2M THBS1	0	0	UP in siEF	10740	positive regulation of intracellular protein kinase cascade	6.2273e-05	39	1392	0.028	GOLT1B SLC44A2 SECTM1 BCL10 CXXC5 THBS1 LITAF AKAP12 ERBB2 LEPR S100A13 HMOX1 IL6R TGM2 IL11 TCF7L2 TGFB2 NEK6 PLK2 DENND2B PLEKHG5 F2R LIF MIB2 MAPK8IP2 RHOC SORBS3 F3 MID1 TGFBR1 BST2 PINK1 CLCF1 C18ORF32 S100A4 MAP3K14 BIRC2 CD44 HBEGF	0	0	DN in EWS								0	0	DN in siEF	7093	mitotic cell cycle checkpoint	0.00020831	12	873	0.013	RB1 CENPE CENPF CCNB1 CCND1 BUB1B KNTC1 GTSE1 BUB1 ZWINT MAD2L1 TICRR	0	0	UP in siEF&EEF	44424	intracellular part	2.1648e-05	1190	1778	0.669	CHIC2 ZNF296 AVIL ALKBH7 ZFYVE1 SCAMP5 LACTB COMTD1 DPYSL4 MLYCD SAMD11 TMEM8B ZNF287 GSTK1 GABARAPL1 MEF2C RFX3 MYL5 EML6 MYL6 PRKAR1B ASPHD1 PRKAR1A DDIT3 ETHE1 DDIT4 RBP1 TXNIP ASPHD2 OPTN ATF3 SKAP2 ZBTB8A NLRX1 MTMR3 CRABP2 FLII SHOX2 TPRG1L AGAP2 PDGFA MTMR9 PLA2G6 DYNC2LI1 EPB41L1 PRKAR2B RDH10 PDGFC MYO6 GTF2IRD2B ABCA1 JUN JUP FUCA1 ABCA3 EDEM2 FN1 EIF2AK3 PBX3 PBX4 GRIN2C LARP6 PBX1 AIF…	0	0
UP in EWS	51098	regulation of binding	0.00093843	16	437	0.036	JUN ANXA3 CEBPG BCL10 ICAM1 IRAK2 DDIT3 IL1B BCL3 JMY HMOX1 TPP1 TRIB3 TRIB1 TLR3 TLR2	0	0	UP in siEF	5102	receptor binding	6.94e-05	112	1392	0.08	SPON2 COL16A1 CSF1 SERPINE2 TNC HR FGF1 CXCL14 ICAM1 CXCL16 ALCAM PALM KDR CCN3 FAM3C PLXNC1 CCN2 CHGB PDGFRB PDGFRA WNT5B ACTN1 F2R DKK1 PGF EREG S100A4 SCG2 EBI3 PDGFB LTBP4 PDGFA LPL DTX1 EFNA5 FBLN5 PCSK1N SOCS1 STC2 PDGFC PENK S100A13 CYTL1 APOE TAC1 WNT3 S100A10 TNFSF18 TGFB2 SMAD3 OSGIN1 LIF L1CAM INHBE SMAD7 REEP1 EFNA1 BMP1 COL5A1 TNFSF4 GIPC1 OGN PLXNB1 TGFBI CXCL8 ITGB5 TGFB1I1 FHL2 SE…	0	0	DN in EWS								0	0	DN in siEF	65003	macromolecular complex assembly	0.00022197	60	873	0.068	AHCTF1 HJURP IL1RAP PREX1 CHAF1B TUBA1B CHAF1A KNTC1 FBXO5 KPNA3 TP63 NDC1 HELLS SHPRH SYK ACTN2 WDR77 OLFM1 TCP1 GEMIN4 GEMIN5 FKBP4 ASF1B MCM2 BLM NUP205 KCNA2 MACROH2A2 CENPA ACAT2 HSPD1 PARD6B CCNB1 TGS1 NACC1 E2F2 COX11 E2F3 PDSS1 TAF9B MDN1 RRM1 RRM2 BRF2 CAV1 FANCA FANCC MPP6 TICRR CENPE ANLN DIAPH1 CENPF UBE2S DLG4 CENPJ TSR1 TUBGCP4 TAF5 PFKM	0	0	UP in siEF&EEF	30199	collagen fibril organization	2.2173e-05	13	1778	0.007	FOXC1 TGFB2 ANXA2 COL11A2 TGFBR1 COL1A1 COL2A1 ADAMTS3 P4HA1 LOX COL5A1 COL5A2 SERPINH1	0	0
UP in EWS	6954	inflammatory response	0.00094708	21	437	0.048	VCAM1 CXCL8 CCL20 FHL1 PLA2G4C IL20RB LY96 FOS F11R NGF HDAC9 THBS1 IRAK2 IL1B NFKBIZ SERPING1 HMOX1 PTX3 A2M TAC1 CD55	0	0	UP in siEF	5575	cellular_component	7.0778e-05	1324	1392	0.951	ZNF296 PID1 AVIL F11R ZFYVE1 SCAMP5 LACTB ISLR COMTD1 DPYSL4 TDO2 TMEM8B SAMD11 MEF2C CXADR UNC5B UNC5C BHLHA15 HSPG2 SIGIRR CH25H MYL6 CLDN4 PRKAR1B ASPHD1 DDIT3 ETHE1 DDIT4 ORAI3 RBP1 ORAI2 TXNIP SPARCL1 ASPHD2 MYL9 ATF3 OPTN SKAP2 ZBTB8A NLRX1 MTMR3 LXN CRABP2 CRABP1 PDGFB PDGFA SLC5A3 ADAMTS10 ADAMTS15 RNF215 EPB41L1 RDH10 PDGFC MYO6 KCNMB4 GTF2IRD2B ABCA1 JUN CADM4 JUP FUCA1 ABCA3 ABCA4 EDEM…	0	0	DN in EWS								0	0	DN in siEF	22607	cellular component assembly	0.00026793	75	873	0.085	AHCTF1 HJURP IL1RAP PREX1 VMO1 CHAF1B TUBA1B BAIAP2L2 CHAF1A KNTC1 FBXO5 KPNA3 TP63 NDC1 HELLS SHPRH SYK ACTN2 HAUS4 HAUS6 TEX15 KNL1 WDR77 OLFM1 TCP1 GEMIN4 ATG4C GEMIN5 FKBP4 ASF1B MCM2 BLM NUP205 KCNA2 THY1 MACROH2A2 CENPA ACAT2 HSPD1 FGD4 PARD6B CCNB1 RACGAP1 TERT TGS1 NACC1 E2F2 COX11 E2F3 PDSS1 TAF9B MDN1 GABBR1 RRM1 RRM2 BRF2 LAMB3 CAV1 FANCA FANCC POU4F1 MPP6 TICRR CENPE ANLN DIAPH1 CENPF…	0	0	UP in siEF&EEF	9611	response to wounding	2.2173e-05	91	1778	0.051	ACHE NRP1 ARF4 B4GALT1 CXCL8 PROS1 FHL1 TNC PLAT ADM F11R CLU ENO3 LTB4R MDK CASP3 NFKBIZ ADORA1 NEFL IL6R CTSB ACVR1 IFNGR1 IGFBP4 SPHK1 ITGA2 CTNNBIP1 MST1 TPM1 PLA2G4C F2R PLAUR CYBA F3 SIGIRR TPST1 ADAM17 VCAN GAL LOX RTN4RL1 NINJ1 ITGA5 PPARA AJUBA CHST2 MGLL EPHA3 CHST3 CFD NOTCH3 PXK C1S SDC2 STXBP1 PDGFA NOD1 TFPI PRDX5 IRAK2 PDPN ERBB2 HMOX1 CD59 S1PR3 APOE CD55 TGFB2 MAP3K1 GSN SMAD3 LA…	0	0
UP in EWS	2673	regulation of acute inflammatory response	0.0010246	6	437	0.013	IL1B SERPING1 IL20RB PTGS2 A2M TAC1	0	0	UP in siEF	10769	regulation of cell morphogenesis involved in differentiation	7.133e-05	22	1392	0.015	APC2 RTN4R NRP1 TGFB2 SMAD3 TNFRSF12A METRN TGFB1I1 SEMA3A ISLR2 SEMA3F NGF SMAD7 GREM1 EFNA1 CDH2 SPP1 PLXNB1 ULK1 APOE LZTS1 PLXNA3	0	0	DN in EWS								0	0	DN in siEF	50000	chromosome localization	0.00027916	7	873	0.008	CENPE CENPF CCNB1 KIF18A CDCA5 BIRC5 DLGAP5	0	0	UP in siEF&EEF	45785	positive regulation of cell adhesion	2.2431e-05	22	1778	0.012	CD63 COL26A1 TGFB2 SMAD3 SDC4 CSF1 ITGA2 TPM1 L1CAM NID1 FSTL3 SMAD7 CYTH3 CCDC80 CDK6 PODXL ERBB2 ITGA6 EMILIN1 CCN1 KIFAP3 TGM2	0	0
UP in EWS	8083	growth factor activity	0.0010549	14	437	0.032	TGFB2 GDF15 PDGFB LIF PDGFA VEGFC NGF DKK1 INHBE VGF PDGFD IL1B CCN2 HBEGF	0	0	UP in siEF	5925	focal adhesion	7.9872e-05	20	1392	0.014	ITGB5 SDC4 FBLIM1 ACTN1 TGFB1I1 FHL2 NTN4 NEDD9 PARVA PARVB LPP AIF1L PDLIM2 ZYX SDC1 AJUBA LIMS2 BCAR1 PDLIM7 TNS2	0	0	DN in EWS								0	0	DN in siEF	51303	establishment of chromosome localization	0.00027916	7	873	0.008	CENPE CENPF CCNB1 KIF18A CDCA5 BIRC5 DLGAP5	0	0	UP in siEF&EEF	30165	PDZ domain binding	2.2528e-05	18	1778	0.01	TAMALIN DOCK4 SLC22A5 KCNJ12 LIN7A SYNJ2 GRIN2C SSTR2 REC8 TGFBR3 SLC9A3R1 ADAM17 TEP1 GIPC1 DMD TBC1D10A HCN2 SNTA1	0	0
UP in EWS	7626	locomotory behavior	0.001215	19	437	0.043	OPRD1 EPHA4 MCOLN3 TGFB2 CXCL8 CCL20 ITGA1 PDGFB PDGFA NGF SOBP AMOT EPS8 NR4A2 IL1B RAC2 PTX3 CCN1 DRD4	0	0	UP in siEF	48468	cell development	8.1215e-05	83	1392	0.059	NRP1 COL18A1 SPON2 TNC ADM CELSR3 PCSK4 EDNRA ALCAM KIF5C TUBB3 KDR SOX8 SOX9 CCN1 CHRNB1 EPHA4 CXADR WNT5B UNC5B TPM1 F2R UNC5C BHLHA15 NGF DKK1 EREG TGFBR3 VCAN RTN4RL1 S100A6 ULK2 S100A4 ULK1 CRYAB OBSL1 SCG2 CD44 GAS7 RTN4R FOXC2 LAMA5 NOTCH3 FOXC1 SEMA3C EPAS1 SDC2 SEMA3A NTM SEMA3B NTN4 SEMA3F EFNA5 FOXO3 CHST11 MAP2 RDH10 MYO6 PSAP ERBB2 HSF4 DMD APOE PLXNA3 TCF7L2 TGFB2 GSN SMAD3 FZD5 LAM…	0	0	DN in EWS								0	0	DN in siEF	31570	DNA integrity checkpoint	0.00031111	13	873	0.014	CDT1 BLM TIPIN PLK1 BRCA1 TICRR BRIP1 CDC45 CCND1 CHEK2 CLSPN GTSE1 DTL	0	0	UP in siEF&EEF	65009	regulation of molecular function	2.3527e-05	156	1778	0.087	ERRFI1 CSF1 CD81 DGKA TNC EDNRA PALM ADORA1 PIM1 LEPR CIR1 MAP3K6 RGS9 TBC1D10A MAP3K5 TGM2 PDK1 TSPYL2 CARD10 TPM2 CTNNBIP1 PRKCD TPM1 F2R PRKCA ACTN4 MAPK8IP3 MAPK8IP1 SIGIRR ERN1 ADAM17 PRKAR1B PRKAR1A TEP1 DDIT3 PARD3 TBC1D23 NEIL1 AJUBA TRIB2 TBC1D19 PXK SDC4 FICD AGAP2 BCL10 ABHD5 HSP90B1 SLC9A3R1 APH1B IRAK2 PRKAR2B CALD1 PSAP DPH3 HMOX1 PMAIP1 ABL2 APOE TBC1D17 JUN TGFB2 SMAD3 JUP GADD45B…	0	0
UP in EWS	6928	cellular component movement	0.0012196	27	437	0.061	NRP1 BTG1 CXCL8 SEMA3B PDGFB PTGS2 ETS1 THBS1 ICAM1 AMOT SDCBP KIF5C FYN CCN2 CTHRC1 EPHA4 TGFB2 VCAM1 DNAH17 TNFRSF12A ITGA1 VEGFC NR4A2 IL1B JMY CDH13 CD24	0	0	UP in siEF	51271	negative regulation of cellular component movement	9.0126e-05	19	1392	0.013	PTPRU CD63 SP100 IGFBP5 ACTN1 IGFBP3 SEMA3A TPM1 PTPRO SERPINE1 PDGFB VASH1 THBS1 SMAD7 GREM1 TGFBR3 ADORA1 HMOX1 APOE	0	0	DN in EWS								0	0	DN in siEF	780	condensed nuclear chromosome, centromeric region	0.00032019	6	873	0.006	SGO1 CCNB1 PLK1 CENPA BUB1 AURKB	0	0	UP in siEF&EEF	30234	enzyme regulator activity	2.7172e-05	131	1778	0.073	ERRFI1 TRIO SERPINE2 PROS1 RCBTB2 DOCK11 RGS2 ARHGAP42 DENND5A RGS9 TBC1D10A MAP3K5 CAST SERPINF1 APLP2 PRKCD MAPK8IP2 MAPK8IP1 TIAM2 PRKAR1B PRKAR1A TXNIP RIN3 TBC1D23 TRIB2 RIN2 BEX3 TBC1D19 AGAP2 RHOBTB3 TWIST1 MTMR9 PIK3R3 RASAL2 STK3 ARHGAP12 PRDX5 PCSK1N PRKAR2B PSAP RHPN1 SERPINH1 APOE TBC1D17 SRGAP1 RALGDS RAB11FIP4 CTSA JUN IQSEC2 HSPA5 TFPI2 CRIM1 ARHGAP29 ADAP1 FER ARHGAP31 GNAQ CD24 R…	0	0
UP in EWS	7167	enzyme linked receptor protein signaling pathway	0.0012196	22	437	0.05	KLF10 EPHA4 CSRNP1 FOXC2 PDGFRA JUN TGFB2 FLT1 ANGPT2 GDF15 PDGFB LIF PDGFA FOS NGF FSTL1 EPS8 KDR TXNIP CCN2 MSX1 HBEGF	0	0	UP in siEF	2376	immune system process	9.2542e-05	114	1392	0.081	IFITM3 SPON2 IFITM2 CSF1 CBLB ETS1 CXCL14 IFI44L ICAM1 IL27RA CXCL16 DHX58 KDR IL6R SOX4 CMKLR1 IL4R RSAD2 PRKCD LMO2 HLA-B HLA-C CYBA HLA-A MR1 GEM SIGIRR SERPING1 SCG2 SKAP2 CFD CD274 NOTCH3 SEMA7A NLRX1 EPAS1 EBI3 PDGFB LPL BCL10 NDRG1 SGPL1 BCL2L11 IRAK2 PODXL S100A13 TNFRSF14 TNFSF18 TGFB2 APOBEC3F SMAD3 APOBEC3G LIF RAB27A POU2F2 BST2 BST1 TNFSF4 BCL3 IL7R CD24 ULBP3 CXCL8 FHL1 SIX1 SECTM1 …	0	0	DN in EWS								0	0	DN in siEF	70271	protein complex biogenesis	0.00033377	48	873	0.054	BLM NUP205 AHCTF1 KCNA2 IL1RAP CENPA HSPD1 PREX1 CHAF1B TUBA1B PARD6B CCNB1 CHAF1A NACC1 E2F2 COX11 E2F3 KNTC1 PDSS1 FBXO5 TAF9B KPNA3 MDN1 TP63 NDC1 RRM1 RRM2 BRF2 SYK ACTN2 CAV1 FANCA FANCC MPP6 CENPE OLFM1 ANLN DIAPH1 CENPF UBE2S DLG4 CENPJ TCP1 GEMIN5 TUBGCP4 TAF5 FKBP4 PFKM	0	0	UP in siEF&EEF	31252	cell leading edge	2.7251e-05	38	1778	0.021	ITGB1 ROBO2 OPRD1 ITGB5 PLD1 CORO1A AMOT CYTH3 SLC9A3R1 CDH2 PODXL PDPN MYO6 ADORA1 PDLIM7 S100A11 GSN TNFRSF12A TPM1 PARVA SYNJ2 MAPK8IP3 AIF1L TIAM2 ARHGAP31 CDK6 JMY ARHGEF4 MYH9 CSPG4 SPRY1 ITGA5 TLN2 VIM NF2 AJUBA BCAR1 GAS7	0	0
UP in EWS	31960	response to corticosteroid stimulus	0.0012196	11	437	0.025	COL1A1 ANXA3 DUSP1 IL1B SERPINE1 ADM FOS CCN2 PTGS2 NGF A2M	0	0	UP in siEF	10811	positive regulation of cell-substrate adhesion	0.00010151	12	1392	0.008	COL26A1 CCDC80 CDK6 SMAD3 SDC4 CSF1 SPP1 KDR CDH13 CCN1 NID1 THBS1	0	0	DN in EWS								0	0	DN in siEF	6461	protein complex assembly	0.00033377	48	873	0.054	BLM NUP205 AHCTF1 KCNA2 IL1RAP CENPA HSPD1 PREX1 CHAF1B TUBA1B PARD6B CCNB1 CHAF1A NACC1 E2F2 COX11 E2F3 KNTC1 PDSS1 FBXO5 TAF9B KPNA3 MDN1 TP63 NDC1 RRM1 RRM2 BRF2 SYK ACTN2 CAV1 FANCA FANCC MPP6 CENPE OLFM1 ANLN DIAPH1 CENPF UBE2S DLG4 CENPJ TCP1 GEMIN5 TUBGCP4 TAF5 FKBP4 PFKM	0	0	UP in siEF&EEF	44464	cell part	2.9117e-05	1572	1778	0.884	ALKBH7 F11R COMTD1 DPYSL4 MLYCD GSTK1 CXADR UNC5B UNC5C FRS3 SIGIRR ASPHD1 DDIT3 DDIT4 ORAI2 TXNIP ASPHD2 OPTN ATF3 SKAP2 EXD2 NLRX1 COL13A1 CRABP2 TPRG1L PDGFA PLA2G6 RNF215 EPB41L1 RDH10 RNF217 PDGFC GTF2IRD2B JUN JUP FUCA1 FN1 EIF2AK3 PBX3 BTBD11 PBX4 L1CAM LARP6 PBX1 AIF1L PPFIBP1 AGO4 SFXN3 HYOU1 FAT3 FXYD5 ACHE ZNF490 JRKL SHB BBC3 PANX2 NEFL TSPO NEFM DLGAP4 PCMTD1 DUSP4 APC2 DUSP5 KCND1 S…	0	0
UP in EWS	9893	positive regulation of metabolic process	0.0012197	46	437	0.105	CSRNP1 FOXC2 MAML2 EPAS1 CEBPG EBI3 CITED4 PDGFB GLIS3 PDGFA BCL10 PTGS2 FOXO3 ETS1 THBS1 TNFSF13B ICAM1 ARNTL HMOX1 SOX8 CCN2 MSX1 CCN1 PDGFRA JUN TGFB2 MPP4 ANXA3 LIF VEGFC FOS NR4A2 HOXB9 KLF5 DDIT3 IL1B IRF1 BCL3 CDH13 TRIB3 PTX3 TRIB1 TLR3 ABCG1 TLR2 CREB5	0	0	UP in siEF	5737	cytoplasm	0.00012614	680	1392	0.488	PATJ PID1 SERPINE2 AVIL ZFYVE1 SCAMP5 LACTB GPR173 COMTD1 DPYSL4 TDO2 CREB3L1 CREB3L2 AP1S2 CYP1B1 HOMER3 TMEM8B ANKS1B CHGB CUBN MBNL2 UNC13A PRKCD FNDC3B CH25H BCAM PRKAR1B ASPHD1 DDIT3 HECW2 ETHE1 DDIT4 RBP1 TXNIP SERPING1 ASPHD2 MYL9 OPTN RNF122 SKAP2 CFD NLRX1 MTMR3 LXN CRABP2 CRABP1 PDGFB PDGFA BCL10 CHST11 EPB41L1 S100A16 RDH10 PDGFC MYO6 S100A13 HMOX1 ST3GAL5 CHST14 S100A11 ABCA1 JUN JUP …	0	0	DN in EWS								0	0	DN in siEF	42770	DNA damage response, signal transduction	0.00040356	16	873	0.018	BLM TIPIN PLK1 BRCA1 FANCB BRCA2 SMC1A TICRR BRIP1 CCND1 CHEK2 CLSPN GTSE1 DTL TP63 TP73	0	0	UP in siEF&EEF	5623	cell	2.9909e-05	1572	1778	0.884	ALKBH7 F11R COMTD1 DPYSL4 MLYCD GSTK1 CXADR UNC5B UNC5C FRS3 SIGIRR ASPHD1 DDIT3 DDIT4 ORAI2 TXNIP ASPHD2 OPTN ATF3 SKAP2 EXD2 NLRX1 COL13A1 CRABP2 TPRG1L PDGFA PLA2G6 RNF215 EPB41L1 RDH10 RNF217 PDGFC GTF2IRD2B JUN JUP FUCA1 FN1 EIF2AK3 PBX3 BTBD11 PBX4 L1CAM LARP6 PBX1 AIF1L PPFIBP1 AGO4 SFXN3 HYOU1 FAT3 FXYD5 ACHE ZNF490 JRKL SHB BBC3 PANX2 NEFL TSPO NEFM DLGAP4 PCMTD1 DUSP4 APC2 DUSP5 KCND1 S…	0	0
UP in EWS	51338	regulation of transferase activity	0.0012862	24	437	0.054	ERRFI1 CARD10 DUSP2 TGFB2 FLT1 SDC4 GADD45B DUSP1 GADD45A ITGA1 PDGFB VLDLR DUSP8 THBS1 RGS4 IL1B TPP1 TRIB3 S1PR2 PKIG TRIB1 CD24 DRD4 TLR3	0	0	UP in siEF	48583	regulation of response to stimulus	0.00014143	71	1392	0.051	CXCL8 SERPINE2 FHL1 SERPINE1 ICAM1 IL27RA EDNRA PLAU ADORA1 KDR MAP3K6 IL6R TGM2 IL13RA1 VKORC1 IL4R ANXA2 PRKCD F2R GAB2 MAPK8IP2 F3 MID1 MAPK8IP1 EREG SIGIRR GREM1 ADORA2B CDH13 SERPING1 PPARA SCG2 CD44 HBEGF CFD C1S C1R UNC93B1 PDGFB PDGFA BCL10 PTGS2 SAMHD1 THBS1 FOXO1 SOCS3 NT5E SOCS1 IRAK2 SPP1 HMOX1 CCL2 FYN APOE A2M TAC1 CD55 TGFB2 APOBEC3F SMAD3 APOBEC3G EYA1 VEGFC COL3A1 TNFSF4 PDCD4 F2…	0	0	DN in EWS								0	0	DN in siEF	7399	nervous system development	0.00048554	89	873	0.101	RET DGKG ALK CNTNAP2 BARHL2 SH3GL3 RAX IRS2 HMGB1 BRCA2 GLI1 CLDN1 NRGN CDC20 SOX2 SALL1 SOX1 POFUT1 SMPD1 DPF3 FEZF1 TP63 PCDHAC2 CHST8 EPHA7 UNC5A DCC PAX5 POU3F1 ADRA2C POU3F2 CIT UHMK1 SLC7A5 OLFM1 ASPM TIAM1 OLFM3 PAX7 FKBP4 DLX5 PRKDC SEMA3D ARX SLC1A3 THY1 BHLHE22 LRP8 NTN1 KALRN PARD6B RACGAP1 FUT9 ERBB4 P2RY1 E2F1 RAD54L OTX2 NCAM2 LRRC4C NKX6-1 ASIC2 NKX2-2 FZD1 NGFR TIMM8A GDF11 EGR2 P…	0	0	UP in siEF&EEF	19904	protein domain specific binding	3.0388e-05	70	1778	0.039	CNTNAP1 CALCOCO1 DOCK4 LDB1 SH3KBP1 DENND1A TRADD LITAF TUBA1A SH3PXD2B NEFL PMEPA1 HOMER3 LRRFIP2 TBC1D10A DLGAP4 TGM2 SNTA1 CTNNBIP1 DAPK3 SHISA5 ADAM10 CYBA SYNGR3 SSTR2 GEM MLF1 ADAM19 TGFBR3 ADAM17 RAP2B ADAM15 TEP1 ARHGEF4 PPARA SHANK3 SQSTM1 STX1A RHOQ TAMALIN SLC22A5 WBP1 LIN7A NOD1 CACNA1C SLC9A3R1 PPP2CB FUT8 PRKAR2B MICAL1 SH3BP5 DMD TCEAL9 KCNJ12 CARD9 SYNJ2 GRIN2C MAPK15 REC8 EHD2 PI…	0	0
UP in EWS	70887	cellular response to chemical stimulus	0.0013294	24	437	0.054	PPP1R15A OPRD1 COLEC12 FOXC2 TGFB2 CXCL8 DUSP1 EPAS1 SERPINE1 ITGA1 PDGFB FOS VLDLR HDAC9 KLF2 HERPUD1 COL1A1 DDIT3 IL1B CYP1A1 HMOX1 CDH13 TRIB3 STX3	0	0	UP in siEF	60322	head development	0.00014143	10	1392	0.007	COL1A1 BST1 PDGFRA SGPL1 ITGA4 ASPH MMP2 ARID5B DKK1 WNT3	0	0	DN in EWS								0	0	DN in siEF	3678	DNA helicase activity	0.00054052	10	873	0.011	PIF1 BLM BRIP1 MCM7 DDX11 MCM4 RAD54L MCM6 DNA2 MCM2	0	0	UP in siEF&EEF	34329	cell junction assembly	3.1511e-05	19	1778	0.01	LAMA5 CD151 JUP ITGB4 LAMB2 ACTN1 LAMC1 AMOT SMAD7 PARD3 DLC1 CD9 ITGA6 ITGA5 TLN2 AJUBA VCL PLEC PDK1	0	0
UP in EWS	44092	negative regulation of molecular function	0.001345	23	437	0.052	OPRD1 ERRFI1 JUN DUSP2 CSTA TGFB2 GADD45B GADD45A SERPINE1 CEBPG DUSP8 THBS1 GNAI1 HERPUD1 RGS4 IRAK2 DDIT3 IL1B HMOX1 TRIB3 PKIG TRIB1 DRD4	0	0	UP in siEF	48729	tissue morphogenesis	0.00015295	44	1392	0.031	NRP1 ERRFI1 FOXC2 LAMA5 NOTCH3 FOXC1 CSF1 SEMA3C TGFB1I1 SEMA3A CTSZ PDGFB TNC SIX1 ADM BCL10 CELSR1 SOCS3 EDNRA PODXL RDH10 SOX9 WNT3 NKX3-1 TGM2 TCF7L1 TGFB2 SMAD3 EYA1 LMO4 GAA TPM1 FZD6 VEGFC KLF4 PGF RGMA SMAD7 TGFBR2 GREM1 COL1A1 TGFBR3 COL1A2 CD44	0	0	DN in EWS								0	0	DN in siEF	44450	microtubule organizing center part	0.00063364	12	873	0.013	PLK4 CENPJ CCNF TCP1 SASS6 BIRC5 TUBGCP3 TUBGCP4 BRCA1 CEP55 MZT1 LRRCC1	0	0	UP in siEF&EEF	6917	induction of apoptosis	3.1836e-05	60	1778	0.033	HRK NRP1 TRIO RASGRF2 TRADD LYST BBC3 AKAP13 AIFM2 CASP3 MCF2L DPF1 ADORA1 MAP3K5 TGM2 PHLDA3 BNIP3L PLEKHG5 ARHGEF17 DAPK3 SHISA5 NME3 PRKCA TGFBR1 TIAM2 ERN1 TEP1 ARHGEF3 ARHGEF4 TNFRSF25 SQSTM1 SOS2 BEX3 RPS27L NOD1 BCL10 FOXO3 TFPT BCL2L11 APH1B TP53INP1 HMOX1 PMAIP1 APOE SMAD3 CD70 BAD BNIP3 RAB27A HIPK2 TP53I3 STK17A STK17B DLC1 BCL3 JMY MAP3K10 ERCC6 CD24 ITM2B	0	0
UP in EWS	30728	ovulation	0.001348	5	437	0.011	IMMP2L IL1B MMP19 PTGS2 FOXO3	0	0	UP in siEF	31982	vesicle	0.00015295	90	1392	0.064	PCSK1 SPARC SERPINE2 SLC2A1 ECE1 PLAT PCSK4 TMEM187 SCAMP5 MAP1LC3B MAP1LC3A PALM AP1S2 NCK2 FAM3C CTSD PHLDA1 CTSB CHGB IL15RA CUBN ANXA2 ANXA3 SPHK1 MYOF IGFBP2 BGN ENTPD7 COPZ2 WIPI1 CYBA SYNGR3 MMP14 TBC1D2 GAL GPRC5A ADAM15 VGF SCN8A SERPING1 RIN3 ULK1 PPIB OPTN CFD OPRD1 CD63 CAMK2D LRP1 UNC93B1 PDGFB PDGFA PLD1 THBS1 THBS3 FSTL3 PCSK1N SYNGR2 APH1B GPNMB MYO6 SPP1 SLC17A5 SH3BP4 BMF RABAC1…	0	0	DN in EWS								0	0	DN in siEF	51297	centrosome organization	0.00065825	9	873	0.01	SGO1 CENPJ SASS6 HAUS4 HAUS6 KIF11 FANCB BRCA2 CKAP5	0	0	UP in siEF&EEF	32990	cell part morphogenesis	3.2043e-05	50	1778	0.028	ROBO2 NRP1 NRP2 CBY1 ADM CLU CELSR3 GLI2 ALCAM KIF5C NEFL NRCAM EPHA4 UNC5B ITGA1 UNC5C PRKCA MAPK8IP3 VCAN RTN4RL1 PARD3 ULK2 B3GNT2 ULK1 CHST3 GAS7 RTN4R LAMA5 NUMBL SDC2 STXBP1 SEMA3A SEMA3B EFNA5 EFNB3 TMEM67 ERBB2 DMD APOE PLXNA3 BBS2 WWTR1 FIS1 LAMB2 L1CAM DCLK1 NR4A2 KLF7 RIT1 TTLL3	0	0
UP in EWS	48008	platelet-derived growth factor receptor signaling pathway	0.001348	5	437	0.011	CSRNP1 PDGFRA PDGFB TXNIP PDGFA	0	0	UP in siEF	71496	cellular response to external stimulus	0.00016953	22	1392	0.015	HRK GSDMD JUN WNT5B HSPA5 SPHK1 FZD7 ASGR1 AQP1 CNN2 FOSL1 COL1A1 NR4A2 MAP1LC3A NUAK2 ADORA2B AXL LEPR HMOX1 ITGA6 CTSD WNT3	0	0	DN in EWS								0	0	DN in siEF	60255	regulation of macromolecule metabolic process	0.00065825	214	873	0.245	RB1 POP1 RAX IKZF2 CDC20 SOX2 SOX1 PSMD3 MYB EPC1 DPF3 FBXO5 TP63 TIPIN PRKCB SFMBT2 RFX2 PASK ISL1 WDR77 UHMK1 ZNF718 DNA2 ASF1B PIF1 SRCAP PRKDC ARX CDCA7 BRIP1 INPP5D HLTF ALX4 PPARGC1B NKX2-2 FZD1 NGFR TRAP1 CDT1 EGR2 BCL11B PLK1 EAF2 NFATC3 NR0B1 IGF1 PA2G4 GDF6 FLI1 ID2 AGO2 REL HOXD4 HOXD3 RCOR1 HOXD8 ZNF135 EZH2 TP73 BARHL2 AHCTF1 CSRNP3 SUV39H1 BRCA1 HOXC12 BRCA2 GLI1 CHAF1B CHAF1A MLX F…	0	0	UP in siEF&EEF	31344	regulation of cell projection organization	3.3229e-05	32	1778	0.017	RTN4R ROBO2 NRP1 NUMBL BRI3 SEMA3A SEMA3F RTN4 PTPRG CDC42 CDH2 PODXL NCS1 NEFL NEFM NRCAM APOE PLXNA3 APC2 TNFRSF12A METRN SPHK1 ITGA2 TGFBR1 EFNA1 TEP1 CDC42EP4 PLXNB2 CDC42EP1 PLXNB1 ULK1 RHOQ	0	0
UP in EWS	10755	regulation of plasminogen activation	0.001348	3	437	0.006	SERPINE2 SERPINE1 THBS1	0	0	UP in siEF	10171	body morphogenesis	0.00017895	9	1392	0.006	COL1A1 PDGFRA SGPL1 ASPH MMP2 ARID5B DKK1 WNT3 CDON	0	0	DN in EWS								0	0	DN in siEF	5635	nuclear envelope	0.0007229	27	873	0.03	NUP205 PAXIP1 PTGER3 TMEM97 IPO7 LMNB1 IPO5 XPO1 NSD2 EPC1 TMEM109 NUP88 KPNA3 NDC1 NUP155 NUP210 TET1 CACYBP RANGAP1 POLA1 CENPF NUP50 NUP35 MATR3 MNS1 DTL KPNB1	0	0	UP in siEF&EEF	35556	intracellular signal transduction	3.4237e-05	127	1778	0.071	RAB3B OXTR CD81 ZFP36 EDNRA RPS6KA5 RPS6KA2 ADORA1 MAP3K6 CCN1 MAP3K5 TGM2 PDK1 CARD10 DAPK3 F2R PRKCA MAPK8IP2 MAPK8IP3 GEM MAPK8IP1 RAB32 RAB30 RAB31 RAB36 RRAGC MAPKAPK2 ULK1 ROR2 RIN2 ARL8A SHC2 RAB5B ARL3 AGAP2 PLD1 RHOBTB1 STK3 IRAK2 HMOX1 APOE RALGDS ABCA1 WWTR1 FZD2 GADD45B EIF2AK3 RABL2A RAB27A ARHGAP29 EFNA1 RCAN1 ARHGAP31 GNAQ BCL3 MAP3K10 FGFR3 RGL2 MYD88 FGFR1 BCAR3 ARF4 FLT1 CXCL8 G…	0	0
UP in EWS	30141	stored secretory granule	0.0013526	15	437	0.034	TGFB2 SERPINE2 ANXA3 ITGA1 PDGFB ITPR1 PDGFA VEGFC THBS1 VGF IL1B SERPING1 STX3 A2M CHGB	0	0	UP in siEF	60323	head morphogenesis	0.00019727	8	1392	0.005	COL1A1 PDGFRA SGPL1 ASPH MMP2 ARID5B DKK1 WNT3	0	0	DN in EWS								0	0	DN in siEF	33043	regulation of organelle organization	0.00072363	28	873	0.032	PIF1 DNMT1 CCNF BRCA1 PKMYT1 SKA3 SKA2 CCNB1 RCC1 BUB1 DLGAP5 PLK4 GABBR1 BORA EGF CAV1 PLA2G4A IGF1 PAX5 MTOR CENPE TPX2 CENPF ESPL1 TMSB15A UBE2N KIF20B FKBP4	0	0	UP in siEF&EEF	12502	induction of programmed cell death	3.4654e-05	60	1778	0.033	HRK NRP1 TRIO RASGRF2 TRADD LYST BBC3 AKAP13 AIFM2 CASP3 MCF2L DPF1 ADORA1 MAP3K5 TGM2 PHLDA3 BNIP3L PLEKHG5 ARHGEF17 DAPK3 SHISA5 NME3 PRKCA TGFBR1 TIAM2 ERN1 TEP1 ARHGEF3 ARHGEF4 TNFRSF25 SQSTM1 SOS2 BEX3 RPS27L NOD1 BCL10 FOXO3 TFPT BCL2L11 APH1B TP53INP1 HMOX1 PMAIP1 APOE SMAD3 CD70 BAD BNIP3 RAB27A HIPK2 TP53I3 STK17A STK17B DLC1 BCL3 JMY MAP3K10 ERCC6 CD24 ITM2B	0	0
UP in EWS	48661	positive regulation of smooth muscle cell proliferation	0.0014416	6	437	0.013	JUN FLT1 PDGFB HMOX1 CDH13 PTGS2	0	0	UP in siEF	16323	basolateral plasma membrane	0.00019727	36	1392	0.025	ITGB5 SDC4 MEGF10 ITGB4 FBLIM1 TGFB1I1 FHL2 NTN4 SLC2A1 NEXN NEDD9 LPP AQP1 PDLIM2 ERBB2 ADORA1 DMD IL6R PDLIM7 TNS2 CXADR ACTN1 PARVA PARVB ATP1B1 ANK1 TGFBR1 AIF1L ZYX SDC1 ITGA6 AJUBA MET LIMS2 BCAR1 CD44	0	0	DN in EWS								0	0	DN in siEF	51783	regulation of nuclear division	0.00073239	12	873	0.013	CENPE CENPF GABBR1 BORA ESPL1 EGF RCC1 IGF1 PKMYT1 KIF20B BUB1 DLGAP5	0	0	UP in siEF&EEF	60548	negative regulation of cell death	3.5369e-05	70	1778	0.039	HRK SIX1 PCSK6 CLU NRBP2 SIX4 FTH1 CASP3 PEA15 ADORA1 MYO18A PIM1 NEFL NKX3-2 SOX4 CTSB IER3 SH3GLB1 ACVR1 BNIP3L MEF2C SPHK1 STRADB ANXA4 TSC22D3 F2R F3 TGFBR1 MAPK8IP1 ADAM17 COL2A1 DDAH2 TEP1 CAT SQSTM1 SLC25A4 DLX1 FOXC1 IFI6 FURIN BCL10 FOXO1 HSP90B1 PPP2CB PRDX5 NUAK2 CHST11 ERBB2 HMOX1 APOE MSX1 CDKN2D TCF7L2 PRNP SMAD3 EYA1 HSPA5 WFS1 BNIP3 VEGFA HIPK2 TNFRSF10D NR4A2 KITLG RIT1 KRT18 BCL…	0	0
UP in EWS	6952	defense response	0.0015574	32	437	0.073	COLEC12 CXCL8 SERPINE1 FHL1 CEBPG IL20RB LY96 BCL10 F11R HDAC9 THBS1 IRAK2 NFKBIZ ANKRD1 HMOX1 APOL1 A2M TAC1 DRD4 CD55 VCAM1 ANXA3 CCL20 PLA2G4C FOS NGF IL1B BCL3 SERPING1 PTX3 TLR3 TLR2	0	0	UP in siEF	51384	response to glucocorticoid stimulus	0.00019766	22	1392	0.015	PCSK1 PTPRU ANXA3 GPX3 PTPRO SERPINE1 IGFBP2 LCAT PLAT ADM PTGS2 NGF ASS1 AQP1 FOSL1 SOCS3 SDC1 ALPL CCL2 IGFBP7 A2M IL6R	0	0	DN in EWS								0	0	DN in siEF	7088	regulation of mitosis	0.00073239	12	873	0.013	CENPE CENPF GABBR1 BORA ESPL1 EGF RCC1 IGF1 PKMYT1 KIF20B BUB1 DLGAP5	0	0	UP in siEF&EEF	5201	extracellular matrix structural constituent	3.6685e-05	24	1778	0.013	COL18A1 COL13A1 LAMB2 TUFT1 LAMA4 COL11A2 TFPI2 FN1 FBLN1 LAMB1 LAMC1 COL1A1 COL2A1 COL5A1 COL4A2 COL4A1 COL6A2 PXDN COL5A2 EMILIN2 EMILIN1 COL9A3 COL9A2 FBN1	0	0
UP in EWS	65009	regulation of molecular function	0.001566	47	437	0.107	OPRD1 ERRFI1 CSTA FLT1 SDC4 SERPINE1 CEBPG PDGFB BCL10 VLDLR THBS1 GNAI1 BBC3 ICAM1 HERPUD1 RGS4 JPH2 APH1B IRAK2 HMOX1 ABL2 CCN2 S1PR2 DRD4 CARD10 JUN DUSP2 TGFB2 GADD45B ANXA3 DUSP1 GADD45A ITGA1 DUSP8 NR4A2 RCAN1 DDIT3 IL1B BCL3 JMY TPP1 TRIB3 PKIG TRIB1 CD24 TLR3 TLR2	0	0	UP in siEF	32570	response to progesterone stimulus	0.00021447	10	1392	0.007	FOSL1 SOCS3 OXTR TGFB2 SOCS1 SPHK1 ERBB2 TXNIP CCL2 THBS1	0	0	DN in EWS								0	0	DN in siEF	33170	protein-DNA loading ATPase activity	0.00080681	4	873	0.004	RFC5 RFC3 RFC4 RFC2	0	0	UP in siEF&EEF	48812	neuron projection morphogenesis	3.6717e-05	43	1778	0.024	RTN4R ROBO2 NRP1 NUMBL NRP2 SDC2 STXBP1 SEMA3A SEMA3B ADM EFNA5 CLU CELSR3 GLI2 ALCAM EFNB3 KIF5C ERBB2 NEFL NRCAM DMD APOE PLXNA3 EPHA4 UNC5B LAMB2 ITGA1 UNC5C PRKCA L1CAM MAPK8IP3 DCLK1 NR4A2 KLF7 RIT1 VCAN RTN4RL1 PARD3 ULK2 B3GNT2 ULK1 CHST3 GAS7	0	0
UP in EWS	50776	regulation of immune response	0.001701	17	437	0.038	TGFB2 FHL1 IL20RB BCL10 TNFSF13B ICAM1 IRAK2 IL1B SERPING1 HMOX1 FYN A2M CD24 TLR3 CD55 IL13RA1 TLR2	0	0	UP in siEF	9897	external side of plasma membrane	0.00024794	27	1392	0.019	CD274 SERPINE2 ECE1 THBS1 ICAM1 ALCAM TNFRSF14 ITGAV CD59 NCAM1 APOE CTSB CUBN ITGA4 L1CAM F3 TGFBR2 TGFBR3 BCAM RTN4RL1 CDH13 ITGA6 PDCD1 MFGE8 IL7R CD44 ABCG1	0	0	DN in EWS								0	0	DN in siEF	51383	kinetochore organization	0.00080681	4	873	0.004	CENPE CENPF CENPH CENPA	0	0	UP in siEF&EEF	5626	insoluble fraction	3.8059e-05	126	1778	0.07	SCARB2 SLC27A1 ABAT COMT GBA2 ENO3 FADS3 EPS8 LAMP1 KIF5A CAPN2 CYP1B1 CCN1 SLC16A3 SLC16A4 CAST CPT1A ATP6V0E1 ACSL1 ENTPD6 HLA-B TAP1 PRKCA TPST1 CYP2U1 PRKAR1B SCN8A ULK1 ATP6V0D1 STX1A RAB5B MTMR3 CD151 H6PD SDC3 TMEM59L ITPR1 LIN7A CACNA1C PLD1 FOXO3 HSP90B1 UGCG BCL2L11 TSPAN9 CALD1 RDH10 HMOX1 PLXNA1 SNX9 WNT3 VAT1 ABCA1 ABCA3 SLC33A1 EPHX1 SYNJ2 L1CAM IGF2R SYT7 LRP1B GRIN2D FOSL1 EHD2 NC…	0	0
UP in EWS	30155	regulation of cell adhesion	0.001701	13	437	0.029	TGFB2 CXCL8 SERPINE2 SDC4 LAMA4 SERPINE1 THBS1 ICAM1 COL1A1 IL1B KDR CDH13 CCN1	0	0	UP in siEF	7169	transmembrane receptor protein tyrosine kinase signaling pathway	0.00025474	37	1392	0.026	FOXC2 FOXC1 FLT1 PDGFB PDGFA PIK3R3 PLAT PTPRJ FGF1 FOXO1 PTPRG EPS8 SGPL1 PDGFC ERBB2 KDR NCK2 CCL2 CCN2 MPZL1 PDGFRB EPHA4 PDGFRA EIF2AK3 ARID5B MAPK8IP2 NGF EREG EFNA1 MYO1E AXL TXNIP ROR2 BCAR1 EPHA3 RHOQ HBEGF	0	0	DN in EWS								0	0	DN in siEF	3689	DNA clamp loader activity	0.00080681	4	873	0.004	RFC5 RFC3 RFC4 RFC2	0	0	UP in siEF&EEF	43226	organelle	3.8822e-05	1029	1778	0.578	CHIC2 ZNF296 AVIL ALKBH7 ZFYVE1 SCAMP5 LACTB COMTD1 MLYCD SAMD11 TMEM8B ZNF287 GSTK1 GABARAPL1 MEF2C RFX3 MYL5 EML6 MYL6 ASPHD1 DDIT3 ETHE1 RBP1 TXNIP ASPHD2 OPTN ATF3 ZBTB8A NLRX1 CRABP2 FLII SHOX2 TPRG1L AGAP2 PDGFA PLA2G6 DYNC2LI1 EPB41L1 PRKAR2B RDH10 PDGFC MYO6 GTF2IRD2B ABCA1 JUN JUP FUCA1 ABCA3 EDEM2 FN1 EIF2AK3 PBX3 PBX4 GRIN2C LARP6 PBX1 AIF1L SFXN3 HYOU1 ACHE ARF4 ZNF251 ZNF490 HEXA JRK…	0	0
UP in EWS	32963	collagen metabolic process	0.0017105	6	437	0.013	COL1A1 ADAMTS3 MMP3 MMP19 MMP10 CLGN	0	0	UP in siEF	60537	muscle tissue development	0.00027157	26	1392	0.018	FOXC2 FOXC1 SEMA3C TSHZ3 TNC CBY1 SIX1 ERBB2 DMD CCN1 CTSB PDGFRB SVIL TGFB2 CXADR IGFBP5 LMO4 GAA TPM1 F2R SMAD7 TGFBR3 RCAN1 MYL6 OBSL1 VAMP5	0	0	DN in EWS								0	0	DN in siEF	45005	maintenance of fidelity involved in DNA-dependent DNA replication	0.00080681	4	873	0.004	BLM TIPIN FANCB BRCA2	0	0	UP in siEF&EEF	4672	protein kinase activity	3.9027e-05	93	1778	0.052	DDR1 NRP1 DYRK4 NRP2 BMPR2 FLT1 TRIO HSPB8 STK19 PKD2 FGFRL1 AKAP13 STK10 DSTYK RPS6KA5 RPS6KA2 PIM1 SPEG MAP3K6 PDK2 MAP3K5 PDK1 ACVR1 EPHA4 CDKL5 MST1 PRKCD DAPK3 DYRK1B PRKCA PDGFRL TGFBR1 TGFBR2 ERN1 TGFBR3 MAPKAPK2 ULK2 ROR1 ULK1 ROR2 SGK1 MET EPHA3 EPHA2 RNASEL CAMK2D LTBP4 LTBP1 STK3 NUAK1 EFNB3 NUAK2 IRAK2 MKNK2 ERBB2 ABL2 FYN NEK8 CDK17 PLK3 CDK18 CDK19 TGFB2 MAP3K1 DMPK RIOK3 NEK6 PLK2 …	0	0
UP in EWS	51099	positive regulation of binding	0.0017105	11	437	0.025	ANXA3 IRAK2 IL1B CEBPG JMY TPP1 TRIB3 BCL10 TLR3 ICAM1 TLR2	0	0	UP in siEF	61138	morphogenesis of a branching epithelium	0.00027157	22	1392	0.015	NRP1 FOXC2 LAMA5 NOTCH3 EYA1 CSF1 SEMA3C SEMA3A CTSZ PDGFB SIX1 ADM PGF TGFBR2 GREM1 SOCS3 EDNRA RDH10 SOX9 CD44 NKX3-1 TGM2	0	0	DN in EWS								0	0	DN in siEF	31023	microtubule organizing center organization	0.00080681	9	873	0.01	SGO1 CENPJ SASS6 HAUS4 HAUS6 KIF11 FANCB BRCA2 CKAP5	0	0	UP in siEF&EEF	35295	tube development	4.3365e-05	57	1778	0.032	ROBO2 NRP1 ERRFI1 BMPR2 B4GALT1 CSF1 CTSZ SIX1 ADM CELSR1 GLI2 EDNRA NKX3-1 TGM2 ACVR1 LMO4 ITGA1 SHROOM3 MAPK8IP3 PGF TGFBR1 RGMA TGFBR2 ACTA2 MMP14 LOX ADORA2B LAMA5 NOTCH3 FOXC1 SDC4 TSHZ3 EPAS1 PDGFA TWIST1 BCL10 BCL2L11 PODXL RDH10 TMEM67 PDPN APOE TFAP2A SMAD3 EYA1 FZD6 LIF PBX1 VEGFA SMAD7 DLC1 ID1 SDC1 SPRY2 SPRY1 LGR4 FGFR1	0	0
UP in EWS	61041	regulation of wound healing	0.0017105	7	437	0.016	SERPINE2 SERPINE1 PDGFB PDGFA F2RL1 THBS1 HBEGF	0	0	UP in siEF	31988	membrane-bounded vesicle	0.00027411	84	1392	0.06	PCSK1 SPARC SERPINE2 SLC2A1 ECE1 PLAT PCSK4 TMEM187 SCAMP5 PALM AP1S2 NCK2 CTSD PHLDA1 CTSB CHGB IL15RA CUBN ANXA2 ANXA3 SPHK1 MYOF BGN ENTPD7 COPZ2 WIPI1 CYBA SYNGR3 MMP14 TBC1D2 GAL GPRC5A ADAM15 VGF SCN8A SERPING1 RIN3 ULK1 PPIB OPTN CFD CD63 CAMK2D LRP1 UNC93B1 PDGFB PDGFA THBS1 THBS3 FSTL3 PCSK1N SYNGR2 APH1B GPNMB MYO6 SPP1 SLC17A5 SH3BP4 BMF RABAC1 A2M RILP SEC31B CACNG4 VAT1 ABCA1 TGFB2 H…	0	0	DN in EWS								0	0	DN in siEF	16568	chromatin modification	0.00081488	33	873	0.037	RB1 KMT2D DNMT1 SRCAP SUV39H1 DOT1L HJURP PHB MACROH2A2 HMGN5 HLTF NSD2 EPC1 DPF3 ARID2 PRMT6 SUZ12 HELLS PRKCB UBE2E1 EAF2 HUWE1 BAZ1A HASPIN RNF40 RBL1 NASP UBE2N TAF5 SMAP2 RCOR1 EZH2 ASF1B	0	0	UP in siEF&EEF	43229	intracellular organelle	4.4338e-05	1027	1778	0.577	CHIC2 ZNF296 AVIL ALKBH7 ZFYVE1 SCAMP5 LACTB COMTD1 MLYCD SAMD11 TMEM8B ZNF287 GSTK1 GABARAPL1 MEF2C RFX3 MYL5 EML6 MYL6 ASPHD1 DDIT3 ETHE1 RBP1 TXNIP ASPHD2 OPTN ATF3 ZBTB8A NLRX1 CRABP2 FLII SHOX2 TPRG1L AGAP2 PDGFA PLA2G6 DYNC2LI1 EPB41L1 PRKAR2B RDH10 PDGFC MYO6 GTF2IRD2B ABCA1 JUN JUP FUCA1 ABCA3 EDEM2 FN1 EIF2AK3 PBX3 PBX4 GRIN2C LARP6 PBX1 AIF1L SFXN3 HYOU1 ACHE ARF4 ZNF251 ZNF490 HEXA JRK…	0	0
UP in EWS	43549	regulation of kinase activity	0.0017818	23	437	0.052	ERRFI1 CARD10 DUSP2 TGFB2 FLT1 SDC4 GADD45B DUSP1 GADD45A ITGA1 PDGFB VLDLR DUSP8 THBS1 RGS4 IL1B TRIB3 S1PR2 PKIG TRIB1 CD24 DRD4 TLR3	0	0	UP in siEF	30017	sarcomere	0.00027907	21	1392	0.015	MYOM1 JUP LMO4 ACTN1 TPM2 MMP2 TPM1 TNC FHL2 NEXN CACNA1C ANK1 MYPN JPH2 ANKRD1 DMD FLNC CCN1 CRYAB TRIM54 OBSL1	0	0	DN in EWS								0	0	DN in siEF	31577	spindle checkpoint	0.00084952	6	873	0.006	CENPE CENPF CCNB1 BIRC5 KNL1 BUB1	0	0	UP in siEF&EEF	323	lytic vacuole	4.7596e-05	48	1778	0.026	SCARB2 CD63 RNF13 IDUA BRI3 UNC93B1 HEXA CTSZ PRCP BCL10 LITAF CLN5 MFSD8 CTSO DRAM1 LAMP1 GM2A CTSL HYAL3 PSAP SLC17A5 STX3 CTSF RILP LDLR CTSD SLC15A4 CTSB SLC36A1 CTSA HGSNAT MANBA FUCA1 GAA RAB27A CTNS IGF2R SYT7 GALNS PLA2G15 NPC2 GLB1 CAT TPP1 PPT2 ARL8A SLC29A3 PCYOX1	0	0
UP in EWS	10035	response to inorganic substance	0.0019205	17	437	0.038	PDGFRA JUN DUSP1 SERPINE1 PDGFA FOS PTGS2 NDRG1 THBS1 KLF2 COL1A1 NR4A2 DDIT3 CYP1A1 TXNIP HMOX1 A2M	0	0	UP in siEF	32403	protein complex binding	0.00029903	39	1392	0.028	PCSK1 CD63 LAMA5 SYNM COL16A1 TNXB ITGB5 LRP1 LTBP4 THBS1 FBLN5 ICAM1 FSTL3 DNAJB2 LGALS3 GPNMB CDH2 ADORA1 KDR TIMP2 CCN2 RGS9 CTSB ACTN1 L1CAM MAPK8IP2 REC8 TGFBR1 SMAD7 PDP1 MYO1E COL3A1 COL5A1 ITGA6 ULK1 ERCC6 TGFBI MFGE8 DOCK2	0	0	DN in EWS								0	0	DN in siEF	731	DNA synthesis involved in DNA repair	0.00086255	5	873	0.005	POLD3 POLA1 RFC3 POLD1 POLE	0	0	UP in siEF&EEF	5764	lysosome	4.7596e-05	48	1778	0.026	SCARB2 CD63 RNF13 IDUA BRI3 UNC93B1 HEXA CTSZ PRCP BCL10 LITAF CLN5 MFSD8 CTSO DRAM1 LAMP1 GM2A CTSL HYAL3 PSAP SLC17A5 STX3 CTSF RILP LDLR CTSD SLC15A4 CTSB SLC36A1 CTSA HGSNAT MANBA FUCA1 GAA RAB27A CTNS IGF2R SYT7 GALNS PLA2G15 NPC2 GLB1 CAT TPP1 PPT2 ARL8A SLC29A3 PCYOX1	0	0
UP in EWS	48660	regulation of smooth muscle cell proliferation	0.0019569	7	437	0.016	JUN FLT1 PDGFB HMOX1 CDH13 PTGS2 TRIB1	0	0	UP in siEF	50921	positive regulation of chemotaxis	0.00030039	13	1392	0.009	SMAD3 CXCL8 SERPINE1 PDGFB VEGFC THBS1 F3 KDR F2RL1 CDH13 CCL2 IL6R SCG2	0	0	DN in EWS								0	0	DN in siEF	44249	cellular biosynthetic process	0.00086343	119	873	0.136	PECR DSCC1 GXYLT2 TTF2 ENO2 PNP PTTG1 POFUT1 EPC1 EARS2 ST6GAL1 TIPIN DGAT2 ALG6 LIG1 ATP11C LIG3 KMO CDC25A MTHFD1 DKC1 PADI2 DNA2 BLM SLC1A3 PHB RPAP1 BRIP1 TERT ORC1 FUT9 HLTF ST8SIA5 KDSR CLSPN VARS1 CDT1 NFATC3 IGF1 FANCB PAICS POLA1 COQ3 NASP AGO2 SERINC5 TOP2A HBS1L FEN1 MCM7 MCM10 FOXM1 BRCA2 CHTF18 PFAS CHAF1B CHAF1A SMPD1 TK1 NOS1 POLE CHST8 RFC5 ARG2 POU1F1 RFC3 RFC4 SYK RFC2 CAD SORD …	0	0	UP in siEF&EEF	8285	negative regulation of cell proliferation	4.8057e-05	68	1778	0.038	CDKN1C COL18A1 PTPRU RARG BTG1 B4GALT1 CXCL8 TGFB1I1 CBLB ADM COMT FGFRL1 ING4 FTH1 CASP3 SESN1 ADORA1 TIMP2 NCK2 SPEG JARID2 KIFAP3 TNS2 NKX3-1 KLF11 CXADR IGFBP5 SERPINF1 CTNNBIP1 F2R P3H1 PRKCA VASH1 SSTR2 TGFBR3 GAL ZEB1 ASPH ADORA2B TEP1 ROR2 SKAP2 FOXO4 PTGS2 TOB1 DNAJB2 ERBB2 HMOX1 APOE MSX1 S100A11 CD276 CDKN2D JUN TGFB2 SMAD3 LIF KLF4 FOSL1 RIT1 FABP3 CDK6 DLC1 PMP22 SPRY2 SPRY1 NF2 MXD4	0	0
UP in EWS	2687	positive regulation of leukocyte migration	0.0020079	6	437	0.013	SERPINE1 VEGFC F2RL1 THBS1 ICAM1 TLR2	0	0	UP in siEF	8284	positive regulation of cell proliferation	0.00031219	63	1392	0.045	NRP1 COL18A1 FLT1 CSF1 CD81 ADM FGF1 AQP1 KDR NCK2 SOX8 CCN2 CCN1 IL6R SOX4 TGM2 IL13RA1 PDGFRB IL11 PDGFRA SPHK1 F2R VASH2 GAB2 PDCD1LG2 NGF F3 PGF TGFBR1 EREG TGFBR2 ADORA2B S100A6 CDH13 MFGE8 SCG2 ATF3 EBI3 PDGFB PDGFA PTN PTGS2 POLD4 PDGFC ERBB2 HSF4 HMOX1 CCL2 S1PR2 TAC1 JUN TGFB2 PRRX1 LAMB2 FZD7 LIF VEGFC FOSL2 FOSL1 CDK6 KLF5 TNFSF4 CD24	0	0	DN in EWS								0	0	DN in siEF	48519	negative regulation of biological process	0.00092503	138	873	0.158	RB1 CD83 CCNF RAX BUB1B IRS2 TTF2 CDC20 SOX2 SALL1 CCND1 BMPER PSMD3 ARHGDIB SACS EPC1 ENPP1 FBXO5 TP63 CER1 TIPIN GAS2L3 DAPK1 USP2 UBE2E1 NPY1R DKK2 WDR77 UHMK1 ARC TIMELESS KIF20B FKBP4 ANAPC1 BLM CPB2 PSMD12 DNMT1 ADRB1 THY1 PHB C5 CCNB1 TERT INPP5D NACC1 G3BP2 UTP20 NKX6-1 NKX2-2 MAP2K6 FZD1 HSPA9 NGFR CDT1 ABCA5 BCL11B ZBTB16 XRCC2 CAV1 EAF2 NR0B1 IGF1 PA2G4 FANCB LIN28B DAB1 ID2 AGO2 STRN …	0	0	UP in siEF&EEF	16323	basolateral plasma membrane	4.812e-05	44	1778	0.024	OSCP1 TES B4GALT1 ITGB5 SDC4 ITGB4 FBLIM1 SH3KBP1 TGFB1I1 FHL2 SLC2A1 NEXN LIN7A NOD1 LPP LASP1 ERBB2 ADORA1 DMD IL6R PDLIM7 TNS2 CXADR DST ITGA2 ACTN1 SLC4A11 PARVA PARVB ANK3 ATP1B1 ANK1 TGFBR1 AIF1L ARHGAP31 DLC1 ZYX SDC1 ITGA6 TLN2 AJUBA MET BCAR1 VCL	0	0
UP in EWS	50670	regulation of lymphocyte proliferation	0.0020304	10	437	0.022	CD274 VCAM1 IL1B EBI3 IL20RB PDCD1LG2 CD24 TAC1 IL13RA1 TNFSF13B	0	0	UP in siEF	42325	regulation of phosphorylation	0.00033095	69	1392	0.049	ERRFI1 FLT1 CSF1 CD81 DGKA FGF1 RGS4 EDNRA RGS3 ADORA1 PIM1 NCK2 CCN2 MAP3K6 IL6R APC2 PDGFRB IL11 CARD10 DUSP2 SPHK1 STRADB IGFBP3 PRKCD F2R DUSP8 DUSP6 TGFBR1 MAPK8IP1 EREG TGFBR2 PRKAR1B ADORA2B CNKSR3 TRIB2 SCG2 CD44 SDC4 LRP1 PDGFB PDGFA BCL10 THBS1 ADCY6 SOCS3 SOCS1 ATXN1 ERBB2 TNFRSF14 APOE S1PR2 JUN TGFB2 SMAD3 RBPMS GADD45B HSPA5 GADD45A LIF VEGFC MAPK15 SMAD7 EFNA1 CLCF1 PDCD4 SPRY2 SPR…	0	0	DN in EWS								0	0	DN in siEF	31323	regulation of cellular metabolic process	0.00096213	232	873	0.265	RB1 POP1 RAX IKZF2 CDC20 SOX2 SOX1 PSMD3 MYB EPC1 DPF3 FBXO5 TP63 TIPIN PRKCB SFMBT2 RFX2 PASK ISL1 WDR77 UHMK1 ZNF718 DNA2 ASF1B PIF1 SRCAP PRKDC ARX CDCA7 THY1 C5 BRIP1 INPP5D HLTF ALX4 PPARGC1B NKX2-2 FZD1 TRAP1 CDT1 EGR2 BCL11B PLK1 EAF2 NFATC3 NR0B1 IGF1 PA2G4 GDF6 FLI1 TPX2 ID2 AGO2 REL HOXD4 HOXD3 RCOR1 HOXD8 ZNF135 EZH2 TP73 BARHL2 AHCTF1 CSRNP3 SUV39H1 BRCA1 HOXC12 BRCA2 GLI1 CHAF1B CHAF…	0	0	UP in siEF&EEF	5773	vacuole	6.1171e-05	53	1778	0.029	SCARB2 RNF13 HEXA CTSZ LITAF MFSD8 MAP1LC3B CTSO LAMP1 GM2A CTSL HYAL3 CTSF CTSD CTSB SLC36A1 HGSNAT GABARAPL1 MANBA GAA WIPI1 PLA2G15 NPC2 CAT ULK1 ATP6V0D1 ARL8A SLC29A3 PCYOX1 CD63 IDUA BRI3 UNC93B1 PRCP BCL10 CLN5 DRAM1 PSAP SLC17A5 STX3 RILP LDLR SLC15A4 CTSA FUCA1 RAB27A CTNS IGF2R SYT7 GALNS GLB1 TPP1 PPT2	0	0
UP in EWS	43388	positive regulation of DNA binding	0.0020304	10	437	0.022	ANXA3 IRAK2 IL1B CEBPG JMY TPP1 BCL10 TLR3 ICAM1 TLR2	0	0	UP in siEF	19199	transmembrane receptor protein kinase activity	0.00033376	19	1392	0.013	PDGFRB NRP1 EPHA4 PDGFRA FLT1 CRIM1 LTBP4 LTBP1 PDGFRL TGFBR1 TGFBR2 TGFBR3 PTK7 AXL ERBB2 KDR ROR2 MET EPHA3	0	0	DN in EWS								0	0	DN in siEF	34621	cellular macromolecular complex subunit organization	0.00097714	36	873	0.041	NUP205 AHCTF1 HJURP TTF2 MACROH2A2 CENPA HSPD1 PREX1 CHAF1B TUBA1B CHAF1A TGS1 COX11 FBXO5 NDC1 HELLS SHPRH WDR77 TICRR CENPE ANLN DIAPH1 CENPF KIF18A CENPH NASP UBE2S CENPJ TCP1 GEMIN4 TSR1 GEMIN5 KIF2C FKBP4 ASF1B MCM2	0	0	UP in siEF&EEF	5581	collagen	7.149e-05	14	1778	0.007	COL18A1 COL13A1 COL11A2 COL1A1 COL2A1 LOX COL5A1 COL4A2 COL4A1 COL7A1 COL6A1 COL5A2 COL9A3 COL9A2	0	0
UP in EWS	48511	rhythmic process	0.0021082	13	437	0.029	JUN TGFB2 FOXO3 ARNTL LFNG IMMP2L NFIL3 VGF BHLHE40 KDR CASP1 CRY1 MMP19	0	0	UP in siEF	9612	response to mechanical stimulus	0.00034235	16	1392	0.011	JUN JUP COL11A1 IGFBP2 NGF F3 AQP1 CNN2 FOSL1 COL1A1 MMP14 MGP TXNIP CCL2 FYN CTSB	0	0	DN in EWS								0	0	DN in siEF	6325	chromatin organization	0.00098142	40	873	0.045	RB1 KMT2D DNMT1 SRCAP SUV39H1 DOT1L HJURP PHB MACROH2A2 CENPA SOX2 CHAF1B CHAF1A HMGN5 SOX1 HLTF NSD2 EPC1 DPF3 ARID2 PRMT6 SUZ12 HELLS SHPRH PRKCB UBE2E1 EAF2 HUWE1 BAZ1A HASPIN RNF40 RBL1 NASP UBE2N TAF5 SMAP2 RCOR1 EZH2 ASF1B MCM2	0	0	UP in siEF&EEF	48008	platelet-derived growth factor receptor signaling pathway	7.3764e-05	10	1778	0.005	MYO1E SGPL1 TEP1 PDGFC TXNIP PDGFA ARID5B PLAT BCAR1 VEGFA	0	0
UP in EWS	51716	cellular response to stimulus	0.0021226	44	437	0.1	HRK PPP1R15A CDS1 OPRD1 COLEC12 FOXC2 CXCL8 EPAS1 SERPINE1 PDGFB ADM VLDLR FOXO3 HDAC9 THBS1 HERPUD1 NUAK2 IRAK2 HMOX1 STX3 CCN1 JUN TGFB2 DUSP1 GADD45A ITGA1 FOS MID1 KLF2 COL1A1 NR4A2 MAPK10 DDIT3 IL1B BCL3 JMY CYP1A1 CRY1 CDH13 TPP1 TRIB3 TRIB1 TLR2 NEK11	0	0	UP in siEF	48771	tissue remodeling	0.00037317	15	1392	0.01	FOXC2 FOXC1 ITGA4 SEMA3C EPAS1 LMO4 F2R BGN LIF MMP14 CTSO ERBB2 TPP1 CSPG4 TGM2	0	0	DN in EWS								0	0	DN in siEF	22008	neurogenesis	0.00099951	55	873	0.063	RET DGKG CNTNAP2 BARHL2 HMGB1 CDC20 SOX2 SOX1 FEZF1 EPHA7 UNC5A DCC POU3F1 ADRA2C POU3F2 CIT UHMK1 ASPM TIAM1 OLFM3 PAX7 FKBP4 DLX5 ARX SLC1A3 THY1 BHLHE22 NTN1 KALRN PARD6B RACGAP1 OTX2 NCAM2 LRRC4C NKX6-1 NKX2-2 FZD1 NGFR GDF11 EGR2 BCL11B FZD4 XRCC2 DCDC2 CCK IGF1 VAX1 POU4F1 POU4F2 DAB1 ARTN TACC3 STRN HOXD3 TP73	0	0	UP in siEF&EEF	23056	positive regulation of signaling process	7.4869e-05	54	1778	0.03	CSF1 TRAF3IP2 GOLT1B SLC44A2 TRADD ECE1 LITAF AKAP12 LEPR CIR1 IL6R LMCD1 TGM2 DENND2B PLEKHG5 F2R SHISA5 TRAF1 MAPK8IP2 RHOC F3 MID1 TGFBR1 CAT BIRC2 HBEGF NOD1 BCL10 CXXC5 TSPAN6 ERBB2 S100A13 HMOX1 NCAM1 TCF7L2 TGFB2 NEK6 PLK2 CARD9 EIF2AK3 LIF MIB2 L1CAM SORBS3 REC8 VEGFA HIPK2 PINK1 KITLG C18ORF32 MAP3K14 TMEM9B MYD88 FGFR1	0	0
UP in EWS	71634	regulation of transforming growth factor-beta production	0.0021574	4	437	0.009	TGFB2 PTGS2 CD24 THBS1	0	0	UP in siEF	31668	cellular response to extracellular stimulus	0.00044929	21	1392	0.015	HRK GSDMD JUN WNT5B HSPA5 SPHK1 FZD7 ASGR1 AQP1 FOSL1 COL1A1 NR4A2 MAP1LC3A NUAK2 ADORA2B AXL LEPR HMOX1 ITGA6 CTSD WNT3	0	0	DN in EWS								0	0	DN in siEF	32502	developmental process	0.0010065	205	873	0.234	RB1 POP1 CCNF RAX CLDN1 CDC20 SOX2 SOX1 CHEK2 DPF3 RTTN FBXO5 TP63 CER1 EPHA7 UNC5A PAQR5 KNL1 ISL1 DKK2 WDR77 UHMK1 TIAM1 ARC PSME4 FREM2 ASF1B ENPEP PRKDC ARX THY1 KALRN CD79A C5 RACGAP1 TERT INPP5D ALX4 NKX2-2 PLK4 FZD1 NGFR EGR2 BCL11B FZD4 SIAH3 XRCC2 NFATC3 NR0B1 IGF1 FLI1 ARTN ID2 SFXN1 STRN HOXD4 HOXD3 HOXD8 TP73 RET BARHL2 SUV39H1 HOXC12 BRCA2 GLI1 JPH1 SMPD1 CCHCR1 FEZF1 CHST8 FOXD3 HEL…	0	0	UP in siEF&EEF	10647	positive regulation of cell communication	7.5643e-05	72	1778	0.04	CDKN1C OXTR BMPR2 FLT1 CSF1 TRAF3IP2 GOLT1B SLC44A2 TGFB1I1 TRADD ECE1 LITAF AKAP12 LEPR CIR1 IL6R LMCD1 SOX4 TGM2 ITGA2 DENND2B PLEKHG5 TMOD2 F2R SHISA5 TRAF1 MAPK8IP2 RHOC F3 MID1 TGFBR1 ADAM17 CAT ITGA5 BIRC2 HBEGF NOD1 FURIN BCL10 PPOX PTGS2 CXXC5 TSPAN6 ERBB2 S100A13 HMOX1 NCAM1 TCF7L2 TGFB2 SMAD3 JUP RBPMS PRRX1 NEK6 PLK2 CARD9 EIF2AK3 LIF MIB2 L1CAM SORBS3 REC8 VEGFA HIPK2 PINK1 KITLG GIPC…	0	0
UP in EWS	48407	platelet-derived growth factor binding	0.0021574	4	437	0.009	COL1A1 PDGFRA PDGFB PDGFA	0	0	UP in siEF	31667	response to nutrient levels	0.0004698	39	1392	0.028	HRK PCSK1 SP100 PDGFA ADM PTGS2 AQP1 SOCS3 MAP1LC3A NUAK2 STC2 HSD17B2 SPP1 LEPR HMOX1 CCL2 IGFBP7 A2M CTSD MEST WNT3 CUBN JUN GSN WNT5B HSPA5 SPHK1 FZD7 IGFBP2 SUOX SSTR2 ASS1 COL1A1 DDIT3 MGP ALPL PPARA NES CD44	0	0	DN in EWS								0	0	DN in siEF	45787	positive regulation of cell cycle	0.0010065	13	873	0.014	EGF USP2 IGF1 FANCB BRCA2 CENPE CCND3 CCNB1 CCND1 ESPL1 ID2 BIRC5 DLGAP5	0	0	UP in siEF&EEF	43066	negative regulation of apoptosis	7.766e-05	67	1778	0.037	HRK SIX1 PCSK6 CLU NRBP2 SIX4 CASP3 PEA15 ADORA1 MYO18A PIM1 NEFL NKX3-2 SOX4 IER3 SH3GLB1 ACVR1 BNIP3L MEF2C SPHK1 STRADB ANXA4 TSC22D3 F2R F3 TGFBR1 MAPK8IP1 ADAM17 COL2A1 DDAH2 TEP1 CAT SQSTM1 DLX1 FOXC1 IFI6 FURIN BCL10 FOXO1 HSP90B1 PPP2CB PRDX5 NUAK2 CHST11 ERBB2 HMOX1 APOE MSX1 CDKN2D TCF7L2 PRNP SMAD3 EYA1 HSPA5 WFS1 BNIP3 VEGFA HIPK2 TNFRSF10D NR4A2 KITLG RIT1 KRT18 BCL3 MYD88 BCL2L1 FGF…	0	0
UP in EWS	32944	regulation of mononuclear cell proliferation	0.0021617	10	437	0.022	CD274 VCAM1 IL1B EBI3 IL20RB PDCD1LG2 CD24 TAC1 IL13RA1 TNFSF13B	0	0	UP in siEF	3779	actin binding	0.00047248	48	1392	0.034	TAGLN SYNPO2 AVIL FBXO25 TNC NEXN LPL KLHL35 MYPN TRIOBP CNN3 CNN2 CNN1 EPB41L1 CALD1 CFL2 TMSB4X MYO6 ENC1 COTL1 PHACTR2 DMD FLNC SYNPO SVIL GSN ACTN1 TPM2 TMOD2 TPM1 SHROOM2 MIB2 DSTN PARVA PARVB CORO2A FHDC1 CORO2B AIF1L MYO1E MYO1B MARCKS DAAM2 PALLD GIPC1 JMY FXYD5 GAS7	0	0	DN in EWS								0	0	DN in siEF	16772	transferase activity, transferring phosphorus-containing groups	0.0010388	70	873	0.08	RET DGKG ALK BUB1B PIK3CG KHK CCND1 CHEK2 PBK RIOK1 TK1 POLE MAP3K4 EPHA5 EPHA7 KCNH5 SYK CHUK DAPK1 PRKCB RIPK4 CAD VRK1 ESCO2 HASPIN PASK PHKA2 CIT UHMK1 RP1 MELK DKC1 PRKD1 DGKK CARD11 CAMK1G PRPS2 IPPK PRKDC PRIM1 PKMYT1 RPAP1 KALRN AK7 AURKB AURKA POLD3 CCNB1 KLC2 GRK5 TERT ERBB4 POLD1 HMGXB3 BUB1 MAP2K6 PLK4 POLQ PLK1 CCK MTOR POLA1 TEC DLG2 MYBBP1A CDK4 POLE2 POLR3E FGFR4 PFKM	0	0	UP in siEF&EEF	15629	actin cytoskeleton	8.3355e-05	53	1778	0.029	CLIC4 AVIL TNC FHL2 PKD2 TRIOBP AMOT LASP1 ACTR1B CAPZB MYO18A CGNL1 ACTN1 TPM2 TPM1 ACTN4 ACTA2 MYL5 ADAM17 MYL6 BIN1 PALLD CDC42EP4 CDC42EP3 MYH9 CDC42EP1 TLN2 STX1A VCL RHOQ GAS7 CAPG CORO1A MYL12A CNN2 SLC9A3R1 CALD1 MYO6 MICALL2 BMF FLNB PDLIM7 SVIL GSN JUP DSTN AIF1L MYO1E MYO1B MARCKS STK17B DLC1 ZYX	0	0
UP in EWS	42035	regulation of cytokine biosynthetic process	0.0022818	9	437	0.02	IL1B IRF1 BCL3 CEBPG EBI3 HMOX1 BCL10 THBS1 TLR3	0	0	UP in siEF	9607	response to biotic stimulus	0.00049267	61	1392	0.043	IFITM3 PCSK1 IFITM1 IFITM2 SERPINE1 ADM LYST IL27RA HERPUD1 IFIH1 CREB3L1 CREB3L2 FBXO6 IL6R RSAD2 ANXA3 GPX3 F2R NGF F3 ACTA2 DNAJC3 NPC2 DDIT3 DNAJC4 IRF7 EPHA3 PPP1R15A UNC93B1 BCL10 PLD1 PTGS2 SAMHD1 DNAJB2 SOCS3 SOCS1 IRAK2 DNAJB5 CCL2 TAC1 JUN SMAD3 APOBEC3G HSPA5 WFS1 STAT2 EDEM2 MX1 EIF2AK3 ISG15 DCLK1 ASS1 BST2 FOSL1 ISG20 ERP44 CDK6 BCL3 ALPL PTX3 CD24	0	0	DN in EWS								0	0	DN in siEF	10558	negative regulation of macromolecule biosynthetic process	0.0011021	52	873	0.059	RB1 SUV39H1 BRCA1 TTF2 HMGB1 BRCA2 SOX2 SALL1 MLX EPC1 ENPP1 TP63 PRMT6 FOXD3 HELLS TIPIN RBM15 USP2 PAX5 SMC1A RBL1 PAX9 TIMELESS ZMYND11 BLM DNMT1 PHB PURB CDC45 CUX2 INPP5D NACC1 E2F1 IGF2BP1 PAIP2 TAF9B FZD1 SUZ12 CDT1 ZBTB16 CAV1 EAF2 NR0B1 PA2G4 FANCB VAX1 POU4F2 CENPF WT1 ID2 AGO2 HOXD8	0	0	UP in siEF&EEF	16043	cellular component organization	8.694e-05	323	1778	0.181	AVIL EPS8 LGALS3 ALCAM RPS6KA5 ZMIZ1 FTH1 AP1S2 SOX9 CCN1 SOX6 KIFAP3 PDK1 TSPYL2 EPHA4 CPT1A ACOT8 CXADR UNC5B ACTN1 DAPK3 KRT8 UNC5C PRKCA ACTN4 MAPK8IP2 MAPK8IP3 ANK1 CCDC80 DAAM1 DAAM2 TEP1 BIN1 PARD3 RBP1 ULK2 RIN3 ULK1 TLN2 RIN2 OBSL1 OPTN SKAP2 NUMBL EPAS1 SDC2 STXBP1 PEX11B PDGFA BCL10 DYNC2LI1 NUAK2 EPB41L1 MICAL1 MYO6 TSPAN4 SERPINH1 HMOX1 APOE MAP9 DECR1 BBS2 ABCA1 WWTR1 FIS1 JUN JUP G…	0	0
UP in EWS	9986	cell surface	0.0022818	21	437	0.048	CD274 VCAM1 SERPINE2 SDC4 TNFRSF12A ITGA1 PDGFB PDGFA ISLR2 THBS1 ICAM1 AMOT GREM1 IRAK2 TIMP2 CDH13 DMD PDCD1 ABCG1 HBEGF TLR2	0	0	UP in siEF	60021	palate development	0.00050548	13	1392	0.009	TBX1 PDGFRA PRRX1 TSHZ1 COL11A2 ARID5B TGFBR1 TGFBR2 TGFBR3 SGPL1 COL2A1 ASPH SCG2	0	0	DN in EWS								0	0	DN in siEF	48699	generation of neurons	0.0011021	52	873	0.059	RET DGKG CNTNAP2 BARHL2 HMGB1 CDC20 SOX2 SOX1 FEZF1 EPHA7 UNC5A DCC ADRA2C POU3F2 CIT UHMK1 ASPM TIAM1 OLFM3 PAX7 FKBP4 DLX5 ARX SLC1A3 THY1 BHLHE22 NTN1 KALRN PARD6B RACGAP1 OTX2 NCAM2 LRRC4C NKX6-1 NKX2-2 FZD1 NGFR GDF11 EGR2 BCL11B FZD4 XRCC2 DCDC2 CCK VAX1 POU4F1 POU4F2 DAB1 ARTN STRN HOXD3 TP73	0	0	UP in siEF&EEF	10769	regulation of cell morphogenesis involved in differentiation	8.9219e-05	25	1778	0.014	RTN4R ROBO2 NRP1 NUMBL TGFB1I1 SEMA3A SEMA3F RTN4 CDH2 NEFL NEFM NRCAM APOE PLXNA3 APC2 WWTR1 TGFB2 SMAD3 TNFRSF12A METRN SMAD7 EFNA1 PLXNB2 PLXNB1 ULK1	0	0
UP in EWS	31667	response to nutrient levels	0.0023128	17	437	0.038	HRK JUN VCAM1 DUSP1 PDGFA ADM VLDLR PTGS2 COL1A1 NUAK2 DDIT3 STC2 IL1B HSD17B2 CYP1A1 HMOX1 A2M	0	0	UP in siEF	61041	regulation of wound healing	0.00050548	13	1392	0.009	VKORC1 SERPINE2 ANXA2 SERPINE1 F2R PDGFB PDGFA THBS1 F3 PLAU F2RL1 APOE HBEGF	0	0	DN in EWS								0	0	DN in siEF	30900	forebrain development	0.0011386	21	873	0.024	CNTNAP2 PCDH9 ARX RAX NR0B1 POU3F1 GLI1 LRP8 POU3F2 SOX2 ASPM SALL1 DAB1 SOX1 ERBB4 E2F1 TACC3 RAD54L OTX2 FEZF1 TP73	0	0	UP in siEF&EEF	4702	receptor signaling protein serine/threonine kinase activity	9.042e-05	19	1778	0.01	ACVR1 PLK3 TGFB2 MAP3K1 BMPR2 PLK2 LTBP4 MAPK15 LTBP1 MAPK12 TGFBR1 TGFBR2 TGFBR3 MAPK11 IRAK2 MAP3K10 MAP3K6 MAP3K14 MAP3K5	0	0
UP in EWS	70663	regulation of leukocyte proliferation	0.0023128	10	437	0.022	CD274 VCAM1 IL1B EBI3 IL20RB PDCD1LG2 CD24 TAC1 IL13RA1 TNFSF13B	0	0	UP in siEF	35239	tube morphogenesis	0.0005171	34	1392	0.024	NRP1 FOXC2 LAMA5 NOTCH3 FOXC1 CSF1 CTSZ SIX1 ADM BCL10 CELSR1 EDNRA BCL2L11 PODXL RDH10 KDR APOE NKX3-1 TGM2 SMAD3 EYA1 LMO4 FZD6 PGF RGMA TGFBR2 GREM1 ACTA2 MMP14 ADORA2B MGP SPRY2 LGR4 CD44	0	0	DN in EWS								0	0	DN in siEF	16887	ATPase activity	0.001152	32	873	0.036	TOP2A PIF1 BLM DDX21 TTF2 ATP1A1 ABCA13 HSPD1 BRIP1 DHX33 HLTF DHX37 LONRF1 MDN1 ABCF1 RFC5 HSPA8 RFC3 DNAH10 RFC4 ABCA5 FANCM RFC2 XRCC2 DDX11 ATAD2 ATP11C DDX54 KIF18A KATNAL1 DNA2 KIF20B	0	0	UP in siEF&EEF	14706	striated muscle tissue development	9.0463e-05	30	1778	0.016	IGSF8 FOXC1 SEMA3C TNC CBY1 SIX1 SIX4 LMNA ERBB2 DMD CCN1 SNTA1 CTSB SVIL TGFB2 CXADR IGFBP5 LMO4 GAA TPM1 F2R VEGFA SMAD7 TGFBR3 RCAN1 MYL6 RCN1 TEP1 AGRN OBSL1	0	0
UP in EWS	51726	regulation of cell cycle	0.002433	25	437	0.057	PPP1R15A CDS1 BEX2 CXCL8 PTGS2 ETS1 THBS1 SESN2 CCN2 CCN1 JUN TGFB2 GADD45B GADD45A LIF CABLES1 NGF RUNX3 GEM RHOB DDIT3 IL1B JMY CYP1A1 NEK11	0	0	UP in siEF	10955	negative regulation of protein maturation by peptide bond cleavage	0.0005171	5	1392	0.003	SERPINE2 SERPINE1 SERPING1 A2M THBS1	0	0	DN in EWS								0	0	DN in siEF	31327	negative regulation of cellular biosynthetic process	0.0012218	53	873	0.06	RB1 SUV39H1 BRCA1 TTF2 HMGB1 BRCA2 SOX2 SALL1 MLX EPC1 ENPP1 TP63 PRMT6 FOXD3 HELLS TIPIN RBM15 USP2 PAX5 SMC1A RBL1 PAX9 TIMELESS ZMYND11 BLM DNMT1 PHB ATP1A1 PURB CDC45 CUX2 INPP5D NACC1 E2F1 IGF2BP1 PAIP2 TAF9B FZD1 SUZ12 CDT1 ZBTB16 CAV1 EAF2 NR0B1 PA2G4 FANCB VAX1 POU4F2 CENPF WT1 ID2 AGO2 HOXD8	0	0	UP in siEF&EEF	9967	positive regulation of signal transduction	9.0786e-05	53	1778	0.029	CSF1 TRAF3IP2 GOLT1B SLC44A2 TRADD LITAF AKAP12 LEPR CIR1 IL6R LMCD1 TGM2 DENND2B PLEKHG5 F2R SHISA5 TRAF1 MAPK8IP2 RHOC F3 MID1 TGFBR1 CAT BIRC2 HBEGF NOD1 BCL10 CXXC5 TSPAN6 ERBB2 S100A13 HMOX1 NCAM1 TCF7L2 TGFB2 NEK6 PLK2 CARD9 EIF2AK3 LIF MIB2 L1CAM SORBS3 REC8 VEGFA HIPK2 PINK1 KITLG C18ORF32 MAP3K14 TMEM9B MYD88 FGFR1	0	0
UP in EWS	45859	regulation of protein kinase activity	0.0025304	22	437	0.05	ERRFI1 CARD10 DUSP2 TGFB2 FLT1 SDC4 GADD45B GADD45A ITGA1 PDGFB VLDLR DUSP8 THBS1 RGS4 IL1B TRIB3 S1PR2 PKIG TRIB1 CD24 DRD4 TLR3	0	0	UP in siEF	30020	extracellular matrix structural constituent conferring tensile strength	0.0005171	5	1392	0.003	COL2A1 COL11A2 COL12A1 COL9A3 COL9A2	0	0	DN in EWS								0	0	DN in siEF	43596	nuclear replication fork	0.0012409	6	873	0.006	POLD3 PURB POLA1 PCNA PRIM1 MCM3	0	0	UP in siEF&EEF	267	cell fraction	0.0001047	154	1778	0.086	SCARB2 SLC27A1 ABAT COMT GBA2 ENO3 FADS3 EPS8 LAMP1 KIF5A CAPN2 CYP1B1 CCN1 SLC16A3 SLC16A4 CAST CPT1A ATP6V0E1 ACSL1 ENTPD6 HLA-B TAP1 PRKCA MAPK8IP3 PLA2G15 TPST1 CYP2U1 PRKAR1B TEP1 SCN8A ULK1 ATP6V0D1 STX1A RAB5B MTMR3 CD151 H6PD SDC3 TMEM59L ITPR1 LIN7A FBLN1 CACNA1C PLD1 FOXO3 FBLN5 HSP90B1 UGCG PCSK1N BCL2L11 PRKAR2B TSPAN9 CALD1 RDH10 HMOX1 PLXNA1 SNX9 WNT3 VAT1 ABCA1 FUCA1 ABCA3 SLC33A1 …	0	0
UP in EWS	50927	positive regulation of positive chemotaxis	0.0025304	5	437	0.011	CXCL8 KDR VEGFC F2RL1 CDH13	0	0	UP in siEF	35556	intracellular signal transduction	0.00054201	99	1392	0.071	RAB3B OXTR CD81 FGF1 RGS4 EDNRA RGS3 RPS6KA2 ADORA1 MAP3K6 CCN1 TGM2 CARD10 F2R BHLHA15 MAPK8IP2 GEM MAPK8IP1 RAB32 RAB30 RAB31 RAB36 RRAGC ULK1 ROR2 RIN2 SCG2 SHC2 PLD1 RHOBTB1 SOCS3 HRH1 SOCS1 IRAK2 HMOX1 APOE RALGDS ABCA1 FZD2 GADD45B EIF2AK3 RABL2A RAB27A ARHGAP29 EFNA1 RCAN1 COL1A2 BCL3 BCAR3 FLT1 CXCL8 PIK3CD ADM RND3 LTB4R TEAD3 DUSP2 SH2D3A SPHK1 STRADB MST1 RRAS2 GAB2 DUSP8 SSTR2 NGF RHO…	0	0	DN in EWS								0	0	DN in siEF	19219	regulation of nucleobase, nucleoside, nucleotide and nucleic acid metabolic process	0.0012848	192	873	0.219	RB1 POP1 RAX TTF2 IKZF2 SOX2 HMGN5 SALL1 SOX1 SALL2 POFUT1 MYB EPC1 DPF3 ARID2 TP63 ZNF560 TIPIN KCNH5 PRKCB SFMBT2 ZBTB37 USP2 RFX2 NPY1R POU3F1 PASK ISL1 POU3F2 WDR77 ZNF718 TIMELESS DNA2 CARD11 ASF1B PIF1 KMT2D ZNF792 BLM DNMT1 SRCAP DLX5 PRKDC ARX CDCA7 ADRB1 THY1 PHB NOP9 BRIP1 CCNB1 HLTF NACC1 TBC1D14 ALX4 OTX2 NKX6-1 PPARGC1B TBC1D15 ZNF300 NKX2-2 FZD1 ESRRA TRAP1 CDT1 EGR2 BCL11B ZBTB16 C…	0	0	UP in siEF&EEF	4714	transmembrane receptor protein tyrosine kinase activity	0.00010774	20	1778	0.011	DDR1 NRP1 EPHA4 NRP2 FLT1 CRIM1 MERTK IGF2R FGFRL1 PDGFRL EFNB3 PTK7 ERBB2 ROR1 ROR2 FGFR3 MET EPHA3 FGFR1 EPHA2	0	0
UP in EWS	30169	low-density lipoprotein binding	0.0025304	5	437	0.011	COLEC12 LIPH CDH13 VLDLR THBS1	0	0	UP in siEF	90066	regulation of anatomical structure size	0.00054201	47	1392	0.033	NRP1 FOXC2 FOXC1 NDRG4 BTG1 AVIL SEMA3A FHL1 PDGFB SEMA3F TRIOBP CXCL16 TRO DNAJB2 EDNRA GNG4 TMSB4X SPP1 NCK2 APOE PLXNA3 APC2 TGFB2 GSN SMAD3 TNFRSF12A LAMB2 SPHK1 OSGIN1 SHROOM2 ISLR2 EMP1 NGF DCLK1 TGFBR1 DCBLD2 GREM1 ACTA2 TGFBR3 DAB2 RRAGC ADORA2B ULK1 NUPR1 IL7R CRYAB HBEGF	0	0	DN in EWS								0	0	DN in siEF	7010	cytoskeleton organization	0.0013267	42	873	0.048	EPB41 BUB1B THY1 KIF11 BRCA2 CENPA ARHGAP4 AURKA PREX1 FGD4 TUBA1B ABLIM2 RACGAP1 ARHGDIB RCC1 FBXO5 SPAG5 HAUS4 KIF23 HAUS6 FANCB KNL1 SSH2 SMC1A CKAP5 ZWINT SGO1 ANLN DIAPH1 KIF18A ESPL1 HOOK1 TMSB15A DLG4 CENPJ SASS6 TACC3 TUBGCP3 KIF2C TUBGCP4 SPC25 SHANK1	0	0	UP in siEF&EEF	35468	positive regulation of signaling pathway	0.00010774	67	1778	0.037	CDKN1C BMPR2 FLT1 CSF1 TRAF3IP2 GOLT1B SLC44A2 TGFB1I1 TRADD ECE1 LITAF AKAP12 LEPR CIR1 IL6R LMCD1 SOX4 TGM2 DENND2B PLEKHG5 TMOD2 F2R SHISA5 TRAF1 MAPK8IP2 RHOC F3 MID1 TGFBR1 ADAM17 CAT ITGA5 BIRC2 HBEGF NOD1 FURIN BCL10 CXXC5 TSPAN6 ERBB2 S100A13 HMOX1 NCAM1 TCF7L2 TGFB2 SMAD3 JUP RBPMS PRRX1 NEK6 PLK2 CARD9 LIF MIB2 L1CAM SORBS3 REC8 VEGFA HIPK2 PINK1 KITLG GIPC1 C18ORF32 MAP3K14 TMEM9B MYD8…	0	0
UP in EWS	30574	collagen catabolic process	0.0025304	5	437	0.011	ADAMTS3 MMP3 MMP19 MMP10 CLGN	0	0	UP in siEF	48146	positive regulation of fibroblast proliferation	0.00056659	11	1392	0.007	PDGFRA CDK6 SPHK1 PDGFC PDGFB S100A6 PDGFA CCN1 FOSL2 AQP1 EREG	0	0	DN in EWS								0	0	DN in siEF	48015	phosphoinositide-mediated signaling	0.0014406	14	873	0.016	TOP2A FEN1 PCNA RFC4 SPAG5 BUB1B IGF1 TYMS PIK3CG ZWINT AURKA P2RY1 PLCH1 CA8	0	0	UP in siEF&EEF	43069	negative regulation of programmed cell death	0.00011757	67	1778	0.037	HRK SIX1 PCSK6 CLU NRBP2 SIX4 CASP3 PEA15 ADORA1 MYO18A PIM1 NEFL NKX3-2 SOX4 IER3 SH3GLB1 ACVR1 BNIP3L MEF2C SPHK1 STRADB ANXA4 TSC22D3 F2R F3 TGFBR1 MAPK8IP1 ADAM17 COL2A1 DDAH2 TEP1 CAT SQSTM1 DLX1 FOXC1 IFI6 FURIN BCL10 FOXO1 HSP90B1 PPP2CB PRDX5 NUAK2 CHST11 ERBB2 HMOX1 APOE MSX1 CDKN2D TCF7L2 PRNP SMAD3 EYA1 HSPA5 WFS1 BNIP3 VEGFA HIPK2 TNFRSF10D NR4A2 KITLG RIT1 KRT18 BCL3 MYD88 BCL2L1 FGF…	0	0
UP in EWS	32677	regulation of interleukin-8 production	0.0025304	5	437	0.011	SERPINE1 BCL3 BCL10 TLR3 TLR2	0	0	UP in siEF	7154	cell communication	0.0005819	97	1392	0.069	OXTR TNC PLAT FGF1 CXCL14 AQP1 GPR176 ADORA1 LEPR CCN1 CHRNB1 WNT5B TMOD2 BHLHA15 PGF EREG SCN8A LTBP4 PDGFA PLD1 EFNA5 HRH1 ATXN1 NUAK2 STC2 MYO6 HMOX1 KCNMB4 APOE SNX7 TAC1 WNT3 NTSR1 TNFSF18 GSDMD JUN TGFB2 FZD2 HSPA5 FZD7 EIF2AK3 ISG15 GRIN2C MAFA BST2 FOSL1 EFNA1 COL1A1 NR4A2 PCDHB2 GIPC1 SNAI2 HRK NRP1 PCSK1 ITGB4 SIX1 PTPRJ ADM ASGR1 MAP1LC3A CTSD GAL3ST4 IL11 SPHK1 KREMEN1 SSTR2 GREM1 CLD…	0	0	DN in EWS								0	0	DN in siEF	51171	regulation of nitrogen compound metabolic process	0.0014671	193	873	0.221	RB1 POP1 RAX IKZF2 SOX2 SOX1 MYB EPC1 DPF3 TP63 TIPIN PRKCB SFMBT2 RFX2 PASK ISL1 WDR77 ZNF718 DNA2 ASF1B PIF1 SRCAP PRKDC ARX CDCA7 THY1 BRIP1 HLTF ALX4 PPARGC1B NKX2-2 FZD1 TRAP1 CDT1 EGR2 BCL11B EAF2 NFATC3 NR0B1 IGF1 PA2G4 GDF6 FLI1 ID2 AGO2 REL HOXD4 HOXD3 RCOR1 HOXD8 ZNF135 EZH2 TP73 BARHL2 AHCTF1 CSRNP3 SUV39H1 BRCA1 HOXC12 BRCA2 GLI1 CHAF1B CHAF1A MLX FEZF1 TCF19 PRMT6 FOXD3 HELLS ARG2 RH…	0	0	UP in siEF&EEF	31175	neuron projection development	0.00012934	48	1778	0.026	RTN4R ROBO2 NRP1 NUMBL NRP2 SDC2 STXBP1 SEMA3A SEMA3B ADM LAMC1 EFNA5 CLU CELSR3 GLI2 ALCAM EFNB3 KIF5C MYO6 ERBB2 NEFL NRCAM DMD STX3 APOE PLXNA3 EPHA4 UNC5B LAMB2 ITGA1 UNC5C PRKCA LAMB1 L1CAM MAPK8IP3 DCLK1 NR4A2 KLF7 RIT1 VCAN RTN4RL1 PARD3 ULK2 B3GNT2 ULK1 CHST3 GAS7 FGFR1	0	0
UP in EWS	80134	regulation of response to stress	0.0025793	20	437	0.045	TGFB2 SERPINE2 SERPINE1 CEBPG PDGFB PDGFA IL20RB BCL10 PTGS2 MID1 THBS1 IRAK2 IL1B SERPING1 F2RL1 A2M TAC1 TLR3 HBEGF TLR2	0	0	UP in siEF	44092	negative regulation of molecular function	0.00058663	53	1392	0.038	ERRFI1 SERPINE1 HR HERPUD1 RGS4 RGS3 PALM ADORA1 PIM1 LEPR APC2 DUSP2 PRKCD DUSP8 SSTR2 COMMD7 DUSP6 MAPK8IP1 SIGIRR DDIT3 ANGPTL2 NEIL1 CRYAB TRIB2 SCG2 OPRD1 SP100 FICD IFI6 CST6 THBS1 GNAI1 ADCY6 CST3 IRAK2 HMOX1 APOE TCF7L2 NQO1 JUN TGFB2 GADD45B HSPA5 GADD45A PSMB8 PSMB9 SMAD7 CYLD TNFSF4 PDCD4 ID3 SPRY2 SPRY1	0	0	DN in EWS								0	0	DN in siEF	51983	regulation of chromosome segregation	0.0014827	5	873	0.005	CENPE CCNB1 ESPL1 KIF2C BUB1	0	0	UP in siEF&EEF	8305	integrin complex	0.00013586	12	1778	0.006	ITGB1 ITGB5 ITGA4 ITGB4 ITGA3 ITGA2 ITGA10 ITGA1 ITGA7 ITGAV ITGA6 ITGA5	0	0
UP in EWS	44259	multicellular organismal macromolecule metabolic process	0.0026122	6	437	0.013	COL1A1 ADAMTS3 MMP3 MMP19 MMP10 CLGN	0	0	UP in siEF	14706	striated muscle tissue development	0.000605	24	1392	0.017	SVIL FOXC2 FOXC1 TGFB2 CXADR IGFBP5 SEMA3C LMO4 GAA TPM1 F2R TNC CBY1 SIX1 SMAD7 TGFBR3 RCAN1 MYL6 ERBB2 DMD CCN1 OBSL1 VAMP5 CTSB	0	0	DN in EWS								0	0	DN in siEF	785	chromatin	0.0014854	24	873	0.027	RB1 SUZ12 HELLS SHPRH DNMT1 TIPIN MCM7 SUV39H1 DSCC1 FANCC KIF22 MACROH2A2 CENPA HMGN5 SALL1 INCENP ID2 TCP1 TIMELESS RCC1 RAD54L OIP5 ASF1B MCM2	0	0	UP in siEF&EEF	51216	cartilage development	0.00013588	22	1778	0.012	DLX2 RARG WNT5B PRRX1 SATB2 COL11A2 EIF2AK3 PRKCA PKD1 COL1A1 ZEB1 COL2A1 BMP1 CHST11 CREB3L2 HOXB3 MSX1 ROR2 SOX9 SOX6 MEF2D FGFR1	0	0
UP in EWS	51090	regulation of transcription factor activity	0.0026177	12	437	0.027	ANXA3 IRAK2 DDIT3 IL1B CEBPG JMY HMOX1 BCL10 TRIB1 TLR3 ICAM1 TLR2	0	0	UP in siEF	50770	regulation of axonogenesis	0.00061091	16	1392	0.011	APC2 RTN4R NRP1 TNFRSF12A METRN SEMA3A ISLR2 SEMA3F NGF EFNA1 CDH2 SPP1 PLXNB1 ULK1 APOE PLXNA3	0	0	DN in EWS								0	0	DN in siEF	19222	regulation of metabolic process	0.001535	240	873	0.274	RB1 POP1 RAX IKZF2 CDC20 SOX2 SOX1 PSMD3 MYB EPC1 DPF3 FBXO5 TP63 TIPIN PRKCB SFMBT2 RFX2 PASK ISL1 WDR77 UHMK1 ZNF718 DNA2 ASF1B PIF1 SRCAP PRKDC ARX CDCA7 THY1 C5 BRIP1 INPP5D HLTF ALX4 PPARGC1B NKX2-2 FZD1 NGFR TRAP1 CDT1 EGR2 BCL11B PLK1 EAF2 NFATC3 NR0B1 IGF1 PA2G4 GDF6 FLI1 TPX2 ID2 AGO2 REL HOXD4 HOXD3 RCOR1 HOXD8 ZNF135 EZH2 TP73 BARHL2 AHCTF1 CSRNP3 SUV39H1 BRCA1 HOXC12 BRCA2 GLI1 CHAF1B…	0	0	UP in siEF&EEF	60537	muscle tissue development	0.00014037	31	1778	0.017	IGSF8 FOXC1 SEMA3C TSHZ3 TNC CBY1 SIX1 SIX4 LMNA ERBB2 DMD CCN1 SNTA1 CTSB SVIL TGFB2 CXADR IGFBP5 LMO4 GAA TPM1 F2R VEGFA SMAD7 TGFBR3 RCAN1 MYL6 RCN1 TEP1 AGRN OBSL1	0	0
UP in EWS	90046	regulation of transcription regulator activity	0.0026177	12	437	0.027	ANXA3 IRAK2 DDIT3 IL1B CEBPG JMY HMOX1 BCL10 TRIB1 TLR3 ICAM1 TLR2	0	0	UP in siEF	5518	collagen binding	0.00061727	12	1392	0.008	SPARC SMAD3 COL5A3 ITGA10 ITGA11 PDGFB FN1 PDGFA THBS1 NID2 CD44 SMAD7	0	0	DN in EWS								0	0	DN in siEF	48856	anatomical structure development	0.0015669	172	873	0.197	RB1 DGKG SH3GL3 POP1 CCNF RTKN2 RAX IRS2 TTF2 CLDN1 CDC20 SOX2 SALL1 SOX1 CCND1 BMPER POFUT1 ENPP1 DPF3 FBXO5 TP63 CER1 PCDHAC2 EPHA7 UNC5A LIG1 USP2 KNL1 POU3F1 POU3F2 WDR77 UHMK1 OLFM1 CACNB2 TIAM1 ARC OLFM3 PKP2 TIMELESS FKBP4 CARD11 FREM2 BLM ENPEP SLC26A2 DLX5 PRKDC HTRA3 ARX SLC1A3 ADRB1 THY1 BHLHE22 KALRN CD79A CCNB1 RACGAP1 FUT9 ALX4 OTX2 LRRC4C NKX6-1 ASIC2 NKX2-2 PLK4 FZD1 ESRRA NGFR EG…	0	0	UP in siEF&EEF	19899	enzyme binding	0.00014455	99	1778	0.055	ERRFI1 ABAT DOCK11 CDH2 COTL1 PIM1 DENND5A IL6R PDK1 PRKCD ADAM10 PRKCA MAPK8IP2 MAPK8IP3 ANK1 MID1 GEM MAPK8IP1 DAAM2 TEP1 BIN1 TXNIP RIN3 TRIB2 SQSTM1 VCL CUL7 SDC4 EPAS1 AGAP2 RHOBTB3 CACNA1C BCL10 FOXO4 PLD1 FOXO3 CORO1A HSP90B1 HMOX1 SNX9 RAB11FIP4 ABCA1 SMAD3 JUP HSPA5 WFS1 IGF2R SMAD7 CYLD FER NBEA TPP1 CALM3 CD24 CALM2 DOCK6 NRP1 DOCK5 DOCK4 BTG1 LDB1 DOCK9 TRADD SLC2A1 PKD2 TRIOBP WDR44 …	0	0
UP in EWS	65008	regulation of biological quality	0.002649	61	437	0.139	NRP1 BTG1 SERPINE1 FHL1 ADM TNFSF13B HERPUD1 AMOT JPH2 PCLO LIPH KDR RAC2 SOX8 CCN1 TNFRSF12A PLLP ITGA1 ISLR2 NGF GREM1 VGF DDIT3 IL1B SERPING1 TLR3 ABCG1 HBEGF TLR2 FOXC2 NDRG4 CALCB EPAS1 CEBPG PDGFB ITPR1 IL20RB CACNA1C PTGS2 FOXO3 NTS HMOX1 DMD FYN TAC1 DRD4 CD55 JUN TGFB2 TXNRD3 GAD1 VEGFC NEB DHRS3 BCL3 BHLHE40 CYP1A1 F2RL1 TPP1 CD24 F2RL2	0	0	UP in siEF	8305	integrin complex	0.0006242	10	1392	0.007	ITGB5 ITGA4 ITGB4 ITGA3 ITGA10 ITGA11 ITGB8 ITGBL1 ITGAV ITGA6	0	0	DN in EWS								0	0	DN in siEF	16740	transferase activity	0.0017612	114	873	0.13	DGKG BUB1B GXYLT2 ALKBH8 PNP CCND1 POFUT1 NDST4 CHEK2 MAP3K4 EPHA5 EPHA7 ST6GAL1 DGAT2 KCNH5 ALG6 DIMT1 DAPK1 PRKCB VRK1 ESCO2 HASPIN PASK ALG10 PHKA2 UHMK1 MELK DKC1 PRKD1 DGKK CARD11 IPPK KMT2D DNMT1 SRCAP PRKDC PKMYT1 RPAP1 KALRN AK7 ACAT2 CCNB1 KLC2 GRK5 TERT FUT9 ST8SIA5 UGT3A2 HMGXB3 MAP2K6 GSTM4 NAA50 PLK4 GSTM1 PLK1 POLA1 COQ3 DLG2 CDK4 ZCCHC4 FGFR4 EZH2 RET ALK SUV39H1 GTDC1 PIK3CG KHK P…	0	0	UP in siEF&EEF	5615	extracellular space	0.00015523	113	1778	0.063	CSF1 SERPINE2 TNC PLAT CLU PVR LOXL1 LOXL2 CXCL16 LEPR IL6R IL15RA WNT5B IGFBP5 IGFBP4 SERPINF1 ENTPD6 IGFBP2 PCOLCE VASH1 HSPG2 PGF BTD LOX CFD HTRA1 LTBP4 PDGFA FBLN1 LTBP3 EFNA5 FBLN5 PCSK1N PDGFC PSAP S100A13 HMOX1 APOE WNT3 FN1 LIF ISG15 IGF2R COL1A1 BMP1 ALPL ULBP2 FBN1 LGALS3BP COL18A1 FLT1 CXCL8 FHL1 CTSZ AKR1B1 ADM LAMC1 VLDLR PCSK6 PTPRG CTSO C1QTNF1 EMILIN3 QSOX1 AMH CTSD LMCD1 CTSB ME…	0	0
UP in EWS	10604	positive regulation of macromolecule metabolic process	0.0026901	42	437	0.096	CSRNP1 FOXC2 MAML2 EPAS1 CEBPG EBI3 CITED4 PDGFB GLIS3 PDGFA BCL10 FOXO3 ETS1 THBS1 TNFSF13B ARNTL HMOX1 SOX8 CCN2 MSX1 CCN1 PDGFRA JUN TGFB2 MPP4 ANXA3 LIF VEGFC FOS NR4A2 HOXB9 KLF5 DDIT3 IL1B IRF1 BCL3 CDH13 TRIB3 TRIB1 TLR3 TLR2 CREB5	0	0	UP in siEF	1974	blood vessel remodeling	0.00063409	9	1392	0.006	FOXC2 FOXC1 ITGA4 SEMA3C EPAS1 LMO4 BGN LIF TGM2	0	0	DN in EWS								0	0	DN in siEF	9890	negative regulation of biosynthetic process	0.0017651	53	873	0.06	RB1 SUV39H1 BRCA1 TTF2 HMGB1 BRCA2 SOX2 SALL1 MLX EPC1 ENPP1 TP63 PRMT6 FOXD3 HELLS TIPIN RBM15 USP2 PAX5 SMC1A RBL1 PAX9 TIMELESS ZMYND11 BLM DNMT1 PHB ATP1A1 PURB CDC45 CUX2 INPP5D NACC1 E2F1 IGF2BP1 PAIP2 TAF9B FZD1 SUZ12 CDT1 ZBTB16 CAV1 EAF2 NR0B1 PA2G4 FANCB VAX1 POU4F2 CENPF WT1 ID2 AGO2 HOXD8	0	0	UP in siEF&EEF	46983	protein dimerization activity	0.00016049	92	1778	0.051	ITGB1 ACHE PYGB SLC27A1 B4GALT1 LDB1 CSF1 HEXA TNC ECE1 ABAT CELSR1 ENO3 ASGR1 BACH2 TRIM8 CREB3L4 CREB3L1 CREB3L2 ADORA1 CCN1 SOX6 IL6R JUNB MAP3K5 SH3GLB1 ACVR1 BNIP3L BATF3 ITGA2 ITGA1 MST1 ADAM10 TAP1 CYBA ACTN4 PGF TGFBR1 SUMF1 CREB3 RRAGC BIN1 DDIT3 CAT MYH9 PLCB1 ATF3 STX1A JDP2 ABCG1 NOTCH3 CEBPD EPAS1 PDGFA CREBL2 CORO1A STK3 IRAK2 PDGFC ERBB2 S100A13 HMOX1 APOE ZNF862 RAB11FIP4 S100A11 …	0	0
UP in EWS	8330	protein tyrosine/threonine phosphatase activity	0.0026901	3	437	0.006	DUSP4 DUSP2 DUSP1	0	0	UP in siEF	43066	negative regulation of apoptosis	0.00066061	53	1392	0.038	HRK SERPINE1 SIX1 AQP1 ADORA1 PIM1 NKX3-2 SOX4 IER3 MEF2C SPHK1 TNFRSF18 STRADB ANXA4 TSC22D3 F2R NGF F3 TGFBR1 MAPK8IP1 COL2A1 DDAH2 ANGPTL2 CDH13 CRYAB SCG2 CD44 FOXC2 FOXC1 AMIGO2 IFI6 BCL10 THBS1 FOXO1 SOCS3 NUAK2 CHST11 ERBB2 HMOX1 CCL2 APOE TNFSF18 TCF7L2 PRNP SMAD3 EYA1 HSPA5 WFS1 NR4A2 KRT18 CLCF1 BCL3 PDE3A	0	0	DN in EWS								0	0	DN in siEF	51052	regulation of DNA metabolic process	0.001848	18	873	0.02	PIF1 CDT1 BLM TIPIN PCNA TEX15 IGF1 BRCA1 FANCB BRCA2 GLI1 SMC1A TICRR RAD50 CDC45 UBE2N USP1 DNA2	0	0	UP in siEF&EEF	5624	membrane fraction	0.00016361	119	1778	0.066	SCARB2 SLC27A1 ABAT COMT GBA2 ENO3 FADS3 EPS8 LAMP1 KIF5A CYP1B1 CCN1 SLC16A3 SLC16A4 CAST CPT1A ATP6V0E1 ACSL1 ENTPD6 HLA-B TAP1 PRKCA TPST1 CYP2U1 SCN8A ULK1 ATP6V0D1 STX1A RAB5B MTMR3 CD151 H6PD SDC3 TMEM59L ITPR1 LIN7A CACNA1C PLD1 FOXO3 HSP90B1 UGCG BCL2L11 TSPAN9 CALD1 RDH10 HMOX1 PLXNA1 SNX9 WNT3 VAT1 ABCA1 ABCA3 SLC33A1 EPHX1 L1CAM IGF2R SYT7 LRP1B GRIN2D FOSL1 EHD2 NCEH1 GNAQ GIPC1 FGFR1…	0	0
UP in EWS	35295	tube development	0.0028104	19	437	0.043	ERRFI1 NRP1 FOXC2 PDGFRA CALCB SDC4 EPAS1 FZD6 ITGA1 LIF PDGFA ADM BCL10 NTS GREM1 KDR TMBIM6 CCN2 NKX3-1	0	0	UP in siEF	51174	regulation of phosphorus metabolic process	0.00070538	70	1392	0.05	ERRFI1 FLT1 CSF1 CD81 DGKA FGF1 RGS4 EDNRA RGS3 ADORA1 PIM1 NCK2 CCN2 MAP3K6 IL6R APC2 PDGFRB IL11 CARD10 DUSP2 SPHK1 STRADB IGFBP3 PRKCD F2R DUSP8 DUSP6 TGFBR1 MAPK8IP1 EREG TGFBR2 PRKAR1B ADORA2B CNKSR3 TRIB2 SCG2 CD44 SDC4 LRP1 PDGFB PDGFA BCL10 THBS1 ADCY6 SOCS3 SOCS1 ATXN1 ERBB2 TNFRSF14 APOE S1PR2 JUN TGFB2 SMAD3 RBPMS GADD45B HSPA5 GADD45A LIF VEGFC MAPK15 SMAD7 EFNA1 RCAN1 CLCF1 PDCD4 SPR…	0	0	DN in EWS								0	0	DN in siEF	48523	negative regulation of cellular process	0.0019025	126	873	0.144	RB1 CCNF RAX BUB1B IRS2 TTF2 CDC20 SOX2 SALL1 CCND1 BMPER PSMD3 ARHGDIB EPC1 ENPP1 FBXO5 TP63 CER1 TIPIN GAS2L3 DAPK1 USP2 UBE2E1 NPY1R DKK2 WDR77 UHMK1 ARC TIMELESS KIF20B FKBP4 ANAPC1 BLM PSMD12 DNMT1 THY1 PHB C5 CCNB1 TERT INPP5D NACC1 UTP20 NKX6-1 NKX2-2 MAP2K6 FZD1 HSPA9 NGFR CDT1 ABCA5 BCL11B ZBTB16 XRCC2 CAV1 EAF2 NR0B1 IGF1 PA2G4 FANCB DAB1 ID2 AGO2 STRN HOXD8 EZH2 TP73 SUV39H1 BRCA1 HMGB…	0	0	UP in siEF&EEF	5788	endoplasmic reticulum lumen	0.00016633	22	1778	0.012	FKBP10 H6PD HSPA5 EDEM2 PTGS2 PDIA5 HSP90B1 SUMF1 PDIA4 RCN3 ERLEC1 ERP44 RCN1 OS9 P4HA1 P4HA2 DNAJC10 CERCAM SERPINH1 FKBP7 HYOU1 PPIB	0	0
UP in EWS	6929	substrate-bound cell migration	0.002856	4	437	0.009	SDCBP TNFRSF12A PDGFB VEGFC	0	0	UP in siEF	19220	regulation of phosphate metabolic process	0.00070538	70	1392	0.05	ERRFI1 FLT1 CSF1 CD81 DGKA FGF1 RGS4 EDNRA RGS3 ADORA1 PIM1 NCK2 CCN2 MAP3K6 IL6R APC2 PDGFRB IL11 CARD10 DUSP2 SPHK1 STRADB IGFBP3 PRKCD F2R DUSP8 DUSP6 TGFBR1 MAPK8IP1 EREG TGFBR2 PRKAR1B ADORA2B CNKSR3 TRIB2 SCG2 CD44 SDC4 LRP1 PDGFB PDGFA BCL10 THBS1 ADCY6 SOCS3 SOCS1 ATXN1 ERBB2 TNFRSF14 APOE S1PR2 JUN TGFB2 SMAD3 RBPMS GADD45B HSPA5 GADD45A LIF VEGFC MAPK15 SMAD7 EFNA1 RCAN1 CLCF1 PDCD4 SPR…	0	0	DN in EWS								0	0	DN in siEF	5643	nuclear pore	0.001923	12	873	0.013	NDC1 NUP205 NUP155 NUP210 NUP50 NUP35 NUP88 RANGAP1 KPNA3 IPO7 KPNB1 IPO5	0	0	UP in siEF&EEF	6986	response to unfolded protein	0.00017051	20	1778	0.011	PPP1R15A HSPA5 AMFR EDEM2 EIF2AK3 HSPA2 HERPUD1 MANF DNAJC3 DNAJB2 ERN1 CREB3 ERP44 DNAJB5 CREB3L4 DDIT3 CREB3L1 DNAJC4 CREB3L2 SERPINH1	0	0
UP in EWS	50671	positive regulation of lymphocyte proliferation	0.0030824	8	437	0.018	VCAM1 IL1B EBI3 PDCD1LG2 CD24 TAC1 IL13RA1 TNFSF13B	0	0	UP in siEF	31410	cytoplasmic vesicle	0.00070538	84	1392	0.06	PCSK1 SPARC SERPINE2 SLC2A1 ECE1 PLAT PCSK4 TMEM187 SCAMP5 MAP1LC3B MAP1LC3A PALM AP1S2 FAM3C CTSD PHLDA1 CTSB CHGB IL15RA CUBN ANXA2 ANXA3 SPHK1 MYOF IGFBP2 BGN ENTPD7 COPZ2 WIPI1 CYBA SYNGR3 MMP14 TBC1D2 GAL GPRC5A ADAM15 VGF SCN8A SERPING1 RIN3 ULK1 PPIB OPTN CFD CD63 CAMK2D LRP1 UNC93B1 PDGFB PDGFA THBS1 THBS3 FSTL3 PCSK1N SYNGR2 APH1B GPNMB MYO6 SLC17A5 SH3BP4 BMF RABAC1 A2M RILP SEC31B CACN…	0	0	DN in EWS								0	0	DN in siEF	51641	cellular localization	0.001923	75	873	0.085	CNTNAP2 RYR2 IPO11 CSE1L BUB1B IPO7 IPO5 PNP XPO1 MLX KIF1C KIF1A AP1S3 TNPO1 CCHCR1 KPNA3 DLGAP5 NDC1 SYK TOMM34 TEX15 KNL1 SYTL5 SGO1 ASPM ESPL1 NUP50 PPIF ATG4C BIRC5 SLC25A10 EXOC6 DTL STEAP2 KPNB1 SHANK1 NUP205 PCNA CDCA5 SLC1A3 CENPA NTN1 AURKB NKD2 CCNB1 KLC2 ORC1 TGS1 G3BP2 MFN2 CHML DYNC1I1 HSPA9 TIMM8A HSPA8 SNAPIN NUP155 EGF ZBTB16 CAV1 EXOC6B AP4B1 MZT1 ZWINT SYT6 CENPE CENPF KIF18A M…	0	0	UP in siEF&EEF	2009	morphogenesis of an epithelium	0.00019184	42	1778	0.023	NRP1 LAMA5 NOTCH3 RARG CSF1 SEMA3C TGFB1I1 SEMA3A CTSZ TNC TWIST1 SIX1 ADM BCL10 CELSR1 GLI2 EDNRA PODXL RDH10 PLXNA1 SOX9 NKX3-1 TGM2 TFAP2A ACVR1 SMAD3 EYA1 LMO4 FZD6 VEGFC SHROOM3 PBX1 PGF VEGFA RGMA TGFBR2 DLC1 HOXB4 HOXB2 FREM2 VCL FGFR1	0	0
UP in EWS	1775	cell activation	0.0030824	18	437	0.041	PDGFRA VCAM1 CXCL8 ANXA3 CEBPG PDGFA HDAC9 NDRG1 APOLD1 ICAM1 IRF1 BCL3 CASP1 FYN CD24 ULBP1 TLR3 TLR2	0	0	UP in siEF	50920	regulation of chemotaxis	0.00074303	14	1392	0.01	SMAD3 CXCL8 SERPINE1 PDGFB VEGFC THBS1 F3 GREM1 KDR F2RL1 CDH13 CCL2 IL6R SCG2	0	0	DN in EWS								0	0	DN in siEF	7417	central nervous system development	0.0020238	41	873	0.046	CNTNAP2 SH3GL3 PRKDC ARX RAX IRS2 BRCA2 GLI1 LRP8 SOX2 SALL1 SOX1 ERBB4 P2RY1 E2F1 RAD54L OTX2 NCAM2 NKX6-1 ASIC2 FEZF1 NKX2-2 CHST8 NGFR GDF11 EGR2 PCDH9 BCL11B DCC ZBTB16 NR0B1 FANCB POU3F1 VAX1 POU3F2 POU4F1 ASPM DAB1 PAX7 TACC3 TP73	0	0	UP in siEF&EEF	139	Golgi membrane	0.00019184	75	1778	0.042	GPSM1 B4GALT1 TMEM167B CHPF RNF13 GOLT1B CLSTN3 GOLIM4 PIK3CD RND3 GALNT10 SCAMP5 GOLGA2 CREB3L4 GLIPR2 BSG NCS1 AP1S2 TMED2 QSOX1 APC2 RHBDF1 SH3GLB1 IL15RA SCARA3 CHPF2 ENTPD6 PAQR3 HLA-A ARFGAP3 IL17RD MAPK8IP3 PJA2 BET1L TPST1 GOLGA8B CREB3 PITPNM1 RAB36 B3GNT2 ST6GALNAC4 CHST2 ABCG1 B4GALT4 CHST3 ARL3 FUT11 TMEM59L SGMS2 RFNG PLD1 FUT8 CHSY1 CHST11 MGAT5 LMAN2 PDGFC MGAT3 ST3GAL4 STX5 ST3GAL…	0	0
UP in EWS	43062	extracellular structure organization	0.0030824	13	437	0.029	FOXC2 PDGFRA TGFB2 COL11A1 COL12A1 OLFML2A DCN COL1A1 ADAMTS3 COL5A3 BCL3 CCN2 CCN1	0	0	UP in siEF	902	cell morphogenesis	0.00077293	46	1392	0.033	RTN4R NRP1 COL18A1 SPON2 LAMA5 NOTCH3 SDC2 SEMA3A SEMA3B CBY1 ADM EFNA5 CELSR3 ALCAM KIF5C TUBB3 ERBB2 DMD APOE SOX9 WNT3 PLXNA3 EPHA4 TGFB2 UNC5B LAMB2 STRADB MST1 FN1 UNC5C L1CAM DKK1 DCLK1 NR4A2 TGFBR3 KLF7 DAB2 VCAN TTLL3 RTN4RL1 S100A6 ULK2 S100A4 ULK1 IL7R GAS7	0	0	DN in EWS								0	0	DN in siEF	9058	biosynthetic process	0.0020325	123	873	0.14	PECR DSCC1 GXYLT2 TTF2 ENO2 SOX2 PNP PTTG1 POFUT1 EPC1 EARS2 ST6GAL1 TIPIN DGAT2 ALG6 LIG1 ATP11C LIG3 KMO CDC25A MTHFD1 DKC1 PADI2 DNA2 BLM SLC1A3 PHB RPAP1 CYB5R2 BRIP1 TERT ORC1 FUT9 HLTF ST8SIA5 KDSR CLSPN VARS1 CDT1 NFATC3 NR0B1 IGF1 FANCB PAICS POLA1 COQ3 NASP AGO2 SERINC5 TOP2A HBS1L FEN1 MCM7 MCM10 GTDC1 FOXM1 BRCA2 CHTF18 PFAS CHAF1B CHAF1A SMPD1 TK1 NOS1 POLE CHST8 RFC5 ARG2 POU1F1 RFC3…	0	0	UP in siEF&EEF	7229	integrin-mediated signaling pathway	0.00020431	18	1778	0.01	ITGB1 LAMA5 ITGB5 ITGA4 DST ITGB4 ITGA3 ITGA2 ITGA1 ADAM10 FUT8 ITGA10 ITGA7 MYH9 ITGAV ITGA6 ITGA5 BCAR1	0	0
UP in EWS	6469	negative regulation of protein kinase activity	0.0032222	10	437	0.022	RGS4 ERRFI1 DUSP2 GADD45B GADD45A IL1B TRIB3 PKIG DUSP8 TRIB1	0	0	UP in siEF	16055	Wnt receptor signaling pathway	0.00077293	25	1392	0.017	PTPRU CALCOCO1 LDB1 NXN TGFB1I1 PTPRO RSPO3 WNT3 SOX4 DACT1 APC2 TLE4 TCF7L2 FZD2 WNT5B FZD5 FZD7 FZD6 KREMEN1 KREMEN2 CYLD SDC1 HBP1 ROR2 CD24	0	0	DN in EWS								0	0	DN in siEF	31326	regulation of cellular biosynthetic process	0.002041	191	873	0.218	RB1 POP1 RAX IRS2 TTF2 IKZF2 SOX2 HMGN5 SALL1 SOX1 SALL2 POFUT1 MYB EPC1 ENPP1 DPF3 ARID2 TP63 ZNF560 TIPIN KCNH5 PRKCB SFMBT2 ZBTB37 USP2 RFX2 NPY1R POU3F1 PASK ISL1 POU3F2 WDR77 UHMK1 ZNF718 TIMELESS DNA2 CARD11 ASF1B KMT2D ZNF792 BLM DNMT1 SRCAP DLX5 PRKDC ARX CDCA7 ADRB1 PHB NOP9 BRIP1 INPP5D HLTF NACC1 ALX4 OTX2 NKX6-1 PPARGC1B ZNF300 NKX2-2 FZD1 ESRRA TRAP1 CDT1 EGR2 BCL11B ZBTB16 CAV1 EAF2…	0	0	UP in siEF&EEF	16773	phosphotransferase activity, alcohol group as acceptor	0.00020498	104	1778	0.058	TRIO DGKA STK19 FGFRL1 STK10 RPS6KA5 RPS6KA2 PIM1 PIP4K2A MAP3K6 PDK2 MAP3K5 PDK1 ACVR1 EPHA4 CDKL5 PRKCD DAPK3 DYRK1B PRKCA PDGFRL ERN1 MAPKAPK2 ULK2 ROR1 ULK1 ROR2 EPHA3 EPHA2 CFD PFKFB3 LTBP4 PIK3R3 LTBP1 STK3 NUAK1 EFNB3 NUAK2 IRAK2 ABL2 NEK8 CDK17 PLK3 CDK18 CDK19 TGFB2 DMPK NEK6 PLK2 NEK7 EIF2AK3 CRIM1 DCLK2 IGF2R DCLK1 FER CDK6 PTK7 MAP3K10 ADCK5 MAP3K14 FGFR3 FGFR1 DDR1 NRP1 DYRK4 NRP2 BM…	0	0
UP in EWS	51091	positive regulation of transcription factor activity	0.0032965	9	437	0.02	ANXA3 IRAK2 IL1B CEBPG JMY BCL10 TLR3 ICAM1 TLR2	0	0	UP in siEF	48699	generation of neurons	0.00077709	75	1392	0.053	NRP1 SPON2 LDB1 SERPINE2 SIX1 RORA ADM CELSR3 PTPRG ALCAM CDH2 KIF5C TUBB3 TIMP2 LZTS1 APC2 EPHA4 WNT5B TNFRSF12A UNC5B METRN SPHK1 ISLR2 UNC5C NGF TGFBR1 VCAN RTN4RL1 S100A6 ULK2 ULK1 ROR2 CD44 GAS7 RTN4R NOTCH3 DLX2 RTN1 BRI3 SDC2 SEMA3A NTM SEMA3B NTN4 DTX1 SEMA3F EFNA5 MAP2 MYO6 PSAP ERBB2 SPP1 FYN DMD APOE WNT3 PLXNA3 MCOLN3 TGFB2 FZD2 EYA1 FZD5 LAMB2 FZD7 LIF VEGFC L1CAM DCLK1 EFNA1 NR4A2 K…	0	0	DN in EWS								0	0	DN in siEF	48732	gland development	0.0020452	23	873	0.026	CHUK EGF CAV1 NR0B1 HOXD13 IRS2 IGF1 TTF2 FANCB BRCA2 GLI1 NTN1 POU3F2 WDR77 SOX2 SALL1 CCND1 WT1 ERBB4 ID2 HOXD3 FKBP4 TP63	0	0	UP in siEF&EEF	1763	morphogenesis of a branching structure	0.00020514	29	1778	0.016	NRP1 LAMA5 NOTCH3 DLX2 B4GALT1 COL13A1 CSF1 SEMA3C SEMA3A CTSZ SIX1 ADM GLI2 EDNRA RDH10 TMEM67 PLXNA1 SOX9 NKX3-1 TGM2 ACVR1 EYA1 PBX1 PGF VEGFA TGFBR2 MMP14 SPRY2 FGFR1	0	0
UP in EWS	90047	positive regulation of transcription regulator activity	0.0032965	9	437	0.02	ANXA3 IRAK2 IL1B CEBPG JMY BCL10 TLR3 ICAM1 TLR2	0	0	UP in siEF	30018	Z disc	0.00077709	13	1392	0.009	JUP LMO4 ACTN1 FHL2 NEXN CACNA1C JPH2 DMD FLNC CCN1 CRYAB TRIM54 OBSL1	0	0	DN in EWS								0	0	DN in siEF	10556	regulation of macromolecule biosynthetic process	0.0021347	183	873	0.209	RB1 POP1 RAX IRS2 TTF2 IKZF2 SOX2 HMGN5 SALL1 SOX1 SALL2 POFUT1 MYB EPC1 ENPP1 DPF3 ARID2 TP63 ZNF560 TIPIN KCNH5 PRKCB SFMBT2 ZBTB37 USP2 RFX2 POU3F1 PASK ISL1 POU3F2 WDR77 UHMK1 ZNF718 TIMELESS DNA2 CARD11 ASF1B KMT2D ZNF792 BLM DNMT1 SRCAP DLX5 PRKDC ARX CDCA7 PHB BRIP1 INPP5D HLTF NACC1 ALX4 OTX2 NKX6-1 PPARGC1B ZNF300 NKX2-2 FZD1 ESRRA TRAP1 CDT1 EGR2 BCL11B ZBTB16 CAV1 EAF2 NFATC3 NR0B1 IGF…	0	0	UP in siEF&EEF	43123	positive regulation of I-kappaB kinase/NF-kappaB cascade	0.00021206	28	1778	0.015	TRAF3IP2 GOLT1B SLC44A2 TRADD NOD1 BCL10 CXXC5 LITAF TSPAN6 S100A13 HMOX1 CIR1 TGM2 NEK6 PLK2 PLEKHG5 CARD9 F2R SHISA5 MIB2 TRAF1 RHOC PINK1 C18ORF32 MAP3K14 TMEM9B MYD88 BIRC2	0	0
UP in EWS	51302	regulation of cell division	0.0032984	7	437	0.016	TGFB2 PDGFD IL1B PDGFB PDGFA CABLES1 VEGFC	0	0	UP in siEF	30193	regulation of blood coagulation	0.00078026	12	1392	0.008	VKORC1 SERPINE2 ANXA2 PLAU SERPINE1 F2R PDGFB PDGFA F2RL1 APOE THBS1 F3	0	0	DN in EWS								0	0	DN in siEF	3887	DNA-directed DNA polymerase activity	0.002238	8	873	0.009	POLD3 POLA1 POLQ MYBBP1A POLD1 POLE2 ESCO2 POLE	0	0	UP in siEF&EEF	45202	synapse	0.00021401	64	1778	0.035	ITGB1 ACHE PRR7 SERPINE2 CLSTN3 SH3KBP1 DENND1A PIK3CD PLAT SYNE1 EPS8 SCAMP5 CDH2 NCS1 PSD3 ADORA1 NEFM HOMER3 DLGAP4 SNTA1 CAST CHRNB1 UNC13A IFNGR1 SPHK1 F2R ADAM10 SYNGR3 PJA2 DNM3 TANC1 PRKAR1A BIN1 MYH9 TLN2 ATP6V0D1 SHANK3 STX1A OPRD1 TAMALIN SDC2 TPRG1L ITPR1 LIN7A CACNA1C PPOX SYNGR1 CAMK2N1 CALD1 ERBB2 DMD HOMER2 GAD1 SAMD4A L1CAM GRIN2C REC8 SYT7 GRIN2D FOSL1 SYT11 GIPC1 AGRN HCN2	0	0
UP in EWS	32946	positive regulation of mononuclear cell proliferation	0.0033397	8	437	0.018	VCAM1 IL1B EBI3 PDCD1LG2 CD24 TAC1 IL13RA1 TNFSF13B	0	0	UP in siEF	32989	cellular component morphogenesis	0.0008027	50	1392	0.035	NRP1 COL18A1 SPON2 CBY1 ADM CELSR3 ALCAM KIF5C TUBB3 SOX9 EPHA4 UNC5B STRADB MST1 TPM1 UNC5C DKK1 TGFBR3 VCAN RTN4RL1 S100A6 ULK2 S100A4 ULK1 OBSL1 GAS7 RTN4R LAMA5 NOTCH3 SDC2 SEMA3A SEMA3B EFNA5 ERBB2 DMD APOE WNT3 PLXNA3 TGFB2 LAMB2 FN1 L1CAM DCLK1 NR4A2 KLF7 DAB2 TTLL3 PMP22 CD9 IL7R	0	0	DN in EWS								0	0	DN in siEF	31324	negative regulation of cellular metabolic process	0.002238	63	873	0.072	RB1 SUV39H1 BUB1B BRCA1 TTF2 HMGB1 BRCA2 CDC20 SOX2 SALL1 PSMD3 MLX EPC1 ENPP1 FBXO5 TP63 PRMT6 FOXD3 HELLS TIPIN RBM15 USP2 UBE2E1 PAX5 SMC1A RBL1 PAX9 TIMELESS ZMYND11 ANAPC1 BLM PSMD12 DNMT1 PHB ATP1A1 PURB CCNB1 CDC45 CUX2 INPP5D NACC1 E2F1 IGF2BP1 PAIP2 TAF9B FZD1 SUZ12 CDT1 ZBTB16 CAV1 EAF2 NR0B1 PA2G4 FANCB VAX1 POU4F2 MTOR CENPF WT1 ID2 AGO2 HOXD8 MAD2L1	0	0	UP in siEF&EEF	1726	ruffle	0.00023304	21	1778	0.011	ITGB1 TNFRSF12A TPM1 SYNJ2 AIF1L AMOT CYTH3 SLC9A3R1 CDK6 PODXL PDPN MYO6 ARHGEF4 MYH9 ITGA5 TLN2 NF2 BCAR1 PDLIM7 S100A11 GAS7	0	0
UP in EWS	8034	lipoprotein binding	0.0033913	6	437	0.013	COLEC12 LIPH CDH13 VLDLR THBS1 TLR2	0	0	UP in siEF	60548	negative regulation of cell death	0.00080659	54	1392	0.038	HRK SERPINE1 SIX1 AQP1 ADORA1 PIM1 NKX3-2 SOX4 CTSB IER3 MEF2C SPHK1 TNFRSF18 STRADB ANXA4 TSC22D3 F2R NGF F3 TGFBR1 MAPK8IP1 COL2A1 DDAH2 ANGPTL2 CDH13 CRYAB SCG2 CD44 FOXC2 FOXC1 AMIGO2 IFI6 BCL10 THBS1 FOXO1 SOCS3 NUAK2 CHST11 ERBB2 HMOX1 CCL2 APOE TNFSF18 TCF7L2 PRNP SMAD3 EYA1 HSPA5 WFS1 NR4A2 KRT18 CLCF1 BCL3 PDE3A	0	0	DN in EWS								0	0	DN in siEF	7275	multicellular organismal development	0.002238	188	873	0.215	RB1 DGKG SH3GL3 POP1 CCNF RTKN2 RAX IRS2 TTF2 CLDN1 CDC20 SOX2 SALL1 SOX1 CCND1 BMPER POFUT1 ARHGDIB ENPP1 DPF3 RTTN TP63 CER1 PCDHAC2 EPHA7 UNC5A PAQR5 USP2 POU3F1 ISL1 POU3F2 DKK2 WDR77 UHMK1 OLFM1 CACNB2 TIAM1 ARC OLFM3 PSME4 PKP2 TIMELESS PKP1 FKBP4 CARD11 FREM2 ASF1B BLM ENPEP SLC26A2 DLX5 PRKDC HTRA3 ARX SLC1A3 ADRB1 THY1 BHLHE22 KALRN CD79A C5 CCNB1 RACGAP1 FUT9 INPP5D ALX4 OTX2 LRRC4C NKX…	0	0	UP in siEF&EEF	35239	tube morphogenesis	0.00023377	41	1778	0.023	NRP1 LAMA5 NOTCH3 FOXC1 B4GALT1 CSF1 CTSZ TWIST1 SIX1 ADM BCL10 CELSR1 GLI2 EDNRA BCL2L11 PODXL RDH10 TMEM67 PDPN APOE NKX3-1 TGM2 TFAP2A ACVR1 SMAD3 EYA1 LMO4 ITGA1 FZD6 SHROOM3 PBX1 PGF VEGFA RGMA TGFBR2 ACTA2 MMP14 ADORA2B DLC1 SPRY2 LGR4	0	0
UP in EWS	45935	positive regulation of nucleobase, nucleoside, nucleotide and nucleic acid metabolic process	0.0034262	32	437	0.073	CSRNP1 FOXC2 MAML2 EPAS1 CEBPG CITED4 PDGFB GLIS3 PDGFA BCL10 FOXO3 ETS1 ARNTL SOX8 MSX1 CCN1 PDGFRA JUN MPP4 ANXA3 LIF FOS NR4A2 HOXB9 KLF5 DDIT3 IL1B IRF1 BCL3 TLR3 TLR2 CREB5	0	0	UP in siEF	51346	negative regulation of hydrolase activity	0.00080659	15	1392	0.01	TGFB2 FICD HSPA5 SERPINE1 IFI6 CST6 THBS1 HERPUD1 CST3 LEPR ANGPTL2 SPRY2 SPRY1 NEIL1 CRYAB	0	0	DN in EWS								0	0	DN in siEF	7420	brain development	0.0024015	31	873	0.035	CNTNAP2 PRKDC ARX RAX IRS2 BRCA2 GLI1 LRP8 SOX2 SALL1 SOX1 ERBB4 P2RY1 E2F1 RAD54L OTX2 NCAM2 FEZF1 NKX2-2 EGR2 PCDH9 NR0B1 FANCB POU3F1 VAX1 POU3F2 POU4F1 ASPM DAB1 TACC3 TP73	0	0	UP in siEF&EEF	60284	regulation of cell development	0.00023377	48	1778	0.026	RTN4R ROBO2 DLX1 NRP1 NOTCH3 DLX2 NUMBL BTG1 B4GALT1 SERPINE2 BRI3 TGFB1I1 SEMA3A SIX1 SEMA3F RTN4 PTPRG GLI2 CDH2 BOC NCS1 TIMP2 NEFL NEFM NRCAM SOX8 APOE SOX9 PLXNA3 APC2 WWTR1 TGFB2 SMAD3 EYA1 TNFRSF12A DYNLT1 METRN SPHK1 SERPINF1 VEGFC PBX1 SMAD7 EFNA1 TEP1 PLXNB2 PLXNB1 ULK1 AGRN	0	0
UP in EWS	50867	positive regulation of cell activation	0.0035095	11	437	0.025	VCAM1 IL1B EBI3 BCL10 CCN2 PDCD1LG2 CD24 TAC1 THBS1 IL13RA1 TNFSF13B	0	0	UP in siEF	16023	cytoplasmic membrane-bounded vesicle	0.00082112	80	1392	0.057	PCSK1 SPARC SERPINE2 SLC2A1 ECE1 PLAT PCSK4 TMEM187 SCAMP5 PALM AP1S2 CTSD PHLDA1 CTSB CHGB IL15RA CUBN ANXA2 ANXA3 SPHK1 MYOF BGN ENTPD7 COPZ2 WIPI1 CYBA SYNGR3 MMP14 TBC1D2 GAL GPRC5A ADAM15 VGF SCN8A SERPING1 RIN3 ULK1 PPIB OPTN CFD CD63 CAMK2D LRP1 UNC93B1 PDGFB PDGFA THBS1 THBS3 FSTL3 PCSK1N SYNGR2 APH1B GPNMB MYO6 SLC17A5 SH3BP4 BMF RABAC1 A2M RILP SEC31B CACNG4 VAT1 ABCA1 TGFB2 HSPA5 ABCA3…	0	0	DN in EWS								0	0	DN in siEF	16787	hydrolase activity	0.0025351	147	873	0.168	DCLRE1B DCLRE1A AHCYL2 ERCC6L TPSB2 PGLYRP2 POP1 NUDT1 DNHD1 TTF2 ABCA13 MANEA LIPE EME1 LIPI NDST4 C3AR1 ENPP1 NUDT15 TPTE2 PPTC7 DDX11 MYH15 USP2 ATP11C PHKA2 CDC25A ASRGL1 NEIL3 PHOSPHO1 MTHFD1 KATNAL1 PADI2 DNA2 KIF20B CES1 PIF1 BLM CPB2 ENPEP SRCAP ABHD3 PDE1B USP54 HTRA3 PDE1A TRHDE BRIP1 KLC2 DHX33 ORC1 FIGNL1 INPP5D HLTF DHX37 NAALAD2 LONRF1 MDN1 HSPA8 DNAH10 ABCA5 FANCM XRCC2 SSH2 KIF18A…	0	0	UP in siEF&EEF	50770	regulation of axonogenesis	0.00023377	19	1778	0.01	APC2 RTN4R ROBO2 NRP1 TNFRSF12A METRN SEMA3A SEMA3F RTN4 EFNA1 CDH2 NEFL PLXNB2 NEFM PLXNB1 NRCAM ULK1 APOE PLXNA3	0	0
UP in EWS	60322	head development	0.0036156	5	437	0.011	COL1A1 BST1 CSRNP1 PDGFRA DKK1	0	0	UP in siEF	43069	negative regulation of programmed cell death	0.00088998	53	1392	0.038	HRK SERPINE1 SIX1 AQP1 ADORA1 PIM1 NKX3-2 SOX4 IER3 MEF2C SPHK1 TNFRSF18 STRADB ANXA4 TSC22D3 F2R NGF F3 TGFBR1 MAPK8IP1 COL2A1 DDAH2 ANGPTL2 CDH13 CRYAB SCG2 CD44 FOXC2 FOXC1 AMIGO2 IFI6 BCL10 THBS1 FOXO1 SOCS3 NUAK2 CHST11 ERBB2 HMOX1 CCL2 APOE TNFSF18 TCF7L2 PRNP SMAD3 EYA1 HSPA5 WFS1 NR4A2 KRT18 CLCF1 BCL3 PDE3A	0	0	DN in EWS								0	0	DN in siEF	44464	cell part	0.0025936	776	873	0.888	PGLYRP2 POP1 TMEM97 CLDN1 ALKBH8 PREX1 LIPE RAVER1 NDST4 PSMD3 RAVER2 C3AR1 ANKFY1 GTSE1 WDHD1 UNC5A FNBP1 RFX2 ISL1 PHKA2 SLC5A6 MTHFD1 PSME4 PADI2 PIF1 CDCA2 TTYH2 CDCA3 CDCA4 CDCA5 CDCA7 NCAPG SLCO5A1 THY1 NCAPH CYB5R2 C5 HSPH1 HMGXB3 PPARGC1B GSTM4 TOE1 NGFR PRPF38A GSTM1 ABCA5 EXOC6B NR0B1 FLI1 AGO2 SASS6 SFXN1 STRN SFXN2 PRRT4 EZH2 NCAPG2 LRRC4 HOXC12 JPH1 ARHGAP4 CHAF1B TUBA1B CHAF1A SMPD1…	0	0	UP in siEF&EEF	10740	positive regulation of intracellular protein kinase cascade	0.00023758	44	1778	0.024	TRAF3IP2 GOLT1B SLC44A2 TRADD NOD1 BCL10 CXXC5 LITAF AKAP12 TSPAN6 ERBB2 LEPR S100A13 HMOX1 CIR1 IL6R TGM2 TCF7L2 TGFB2 NEK6 PLK2 DENND2B PLEKHG5 CARD9 F2R LIF SHISA5 MIB2 TRAF1 MAPK8IP2 RHOC SORBS3 F3 MID1 TGFBR1 HIPK2 PINK1 C18ORF32 MAP3K14 TMEM9B MYD88 BIRC2 FGFR1 HBEGF	0	0
UP in EWS	42129	regulation of T cell proliferation	0.0036156	8	437	0.018	CD274 VCAM1 IL1B EBI3 IL20RB PDCD1LG2 CD24 TNFSF13B	0	0	UP in siEF	48701	embryonic cranial skeleton morphogenesis	0.00089646	9	1392	0.006	TBX1 FOXC2 DLX2 SMAD3 PRRX1 CHST11 RDH10 TGFBR1 TGFBR2	0	0	DN in EWS								0	0	DN in siEF	5623	cell	0.0026277	776	873	0.888	PGLYRP2 POP1 TMEM97 CLDN1 ALKBH8 PREX1 LIPE RAVER1 NDST4 PSMD3 RAVER2 C3AR1 ANKFY1 GTSE1 WDHD1 UNC5A FNBP1 RFX2 ISL1 PHKA2 SLC5A6 MTHFD1 PSME4 PADI2 PIF1 CDCA2 TTYH2 CDCA3 CDCA4 CDCA5 CDCA7 NCAPG SLCO5A1 THY1 NCAPH CYB5R2 C5 HSPH1 HMGXB3 PPARGC1B GSTM4 TOE1 NGFR PRPF38A GSTM1 ABCA5 EXOC6B NR0B1 FLI1 AGO2 SASS6 SFXN1 STRN SFXN2 PRRT4 EZH2 NCAPG2 LRRC4 HOXC12 JPH1 ARHGAP4 CHAF1B TUBA1B CHAF1A SMPD1…	0	0	UP in siEF&EEF	30155	regulation of cell adhesion	0.00024992	33	1778	0.018	CD63 LAMA5 CXCL8 SDC4 CSF1 SERPINE2 LAMA4 NID1 FSTL3 CYTH3 PODXL ERBB2 EMILIN1 CCN1 KIFAP3 TGM2 COL26A1 TGFB2 GSN SMAD3 ITGA2 TPM1 ADAM10 L1CAM SMAD7 COL1A1 MMP14 CCDC80 CDK6 TEP1 ITGA6 FXYD5 NF2	0	0
UP in EWS	70665	positive regulation of leukocyte proliferation	0.0036156	8	437	0.018	VCAM1 IL1B EBI3 PDCD1LG2 CD24 TAC1 IL13RA1 TNFSF13B	0	0	UP in siEF	14070	response to organic cyclic substance	0.00093929	27	1392	0.019	PCSK1 OXTR SDC2 PDGFB AK4 PTGS2 SOCS3 EDNRA LEPR HMOX1 IGFBP7 CCN2 TAC1 CTSB VKORC1 CHRNB1 JUN GPX3 SPHK1 EPHX1 NGF DUSP6 TGFBR1 FOSL1 MMP14 BIRC2 CD44	0	0	DN in EWS								0	0	DN in siEF	45842	positive regulation of mitotic metaphase/anaphase transition	0.0026904	3	873	0.003	CENPE ESPL1 DLGAP5	0	0	UP in siEF&EEF	1655	urogenital system development	0.00026848	32	1778	0.017	ROBO2 RARG FOXC1 TSHZ3 TNC SIX1 AHR NID1 PKD2 GLI2 SGPL1 BCL2L11 RDH10 SOX9 AMH NKX3-1 ACVR1 WWTR1 EYA1 WFS1 SERPINF1 ARID5B PBX1 ASS1 TGFBR1 VEGFA MYO1E TEP1 ID3 TPP1 SPRY1 FBN1	0	0
UP in EWS	165	MAPKKK cascade	0.0036978	14	437	0.032	DUSP4 DUSP2 FLT1 GADD45B ITGA1 DUSP8 THBS1 RGS4 MAPK10 IL1B RAPGEF2 S1PR2 TRIB1 DRD4	0	0	UP in siEF	30246	carbohydrate binding	0.0009421	51	1392	0.036	PYGB SERPINE2 FGF1 HAPLN3 ASGR1 GALNT10 MRC2 LGALS3 ADAMTS3 MDK RSPO3 FBXO6 CCN2 CCN1 GALNT9 POSTN MANBA COL25A1 BGN PGF TGFBR2 TGFBR3 VCAN CCDC80 CD44 HBEGF COLEC12 TNXB LTBP4 LPL PRELP PTN THBS1 FSTL1 THBS3 OS9 GPNMB PSAP CCL2 APOE SUSD5 ATRNL1 FUCA1 GFPT2 GALNT1 FN1 L1CAM MAFA COL5A1 COL5A3 PTX3	0	0	DN in EWS								0	0	DN in siEF	6273	lagging strand elongation	0.0026904	3	873	0.003	POLA1 FEN1 DNA2	0	0	UP in siEF&EEF	45859	regulation of protein kinase activity	0.00027019	64	1778	0.035	CDKN1C ERRFI1 FLT1 CSF1 CD81 DGKA VLDLR SPRED3 SPRED1 EDNRA CASP3 ADORA1 PIM1 NCK2 MAP3K6 MAP3K5 PDK1 APC2 TSPYL2 CARD10 SPHK1 STRADB ITGA1 F2R PRKCA DUSP8 MAPK8IP3 TGFBR1 MAPK8IP1 TGFBR2 ERN1 ADAM17 PRKAR1B ADORA2B PRKAR1A TEP1 PARD3 TRIB2 SDC4 LRP1 PPOX ADCY6 GNAI2 PRKAR2B ERBB2 SH3BP5 APOE S1PR2 CDKN2D TGFB2 MAP3K1 GADD45B HSPA5 GADD45A EFNA1 KITLG GNAQ PDCD4 MAP3K10 SPRY2 SPRY1 ERCC6 NF2 CD24	0	0
UP in EWS	10628	positive regulation of gene expression	0.0037706	30	437	0.068	CSRNP1 FOXC2 MAML2 EPAS1 CITED4 GLIS3 BCL10 FOXO3 ETS1 TNFSF13B ARNTL SOX8 CCN2 MSX1 CCN1 JUN MPP4 LIF FOS NR4A2 HOXB9 KLF5 DDIT3 IL1B IRF1 BCL3 CDH13 TLR3 TLR2 CREB5	0	0	UP in siEF	32101	regulation of response to external stimulus	0.00094475	32	1392	0.022	CXCL8 SERPINE2 SERPINE1 PDGFB PDGFA PTGS2 THBS1 NT5E EDNRA PLAU SPP1 ADORA1 KDR CCL2 APOE A2M TAC1 IL6R TGM2 VKORC1 SMAD3 ANXA2 F2R VEGFC F3 GREM1 ADORA2B F2RL1 CDH13 SERPING1 PPARA SCG2	0	0	DN in EWS								0	0	DN in siEF	15631	tubulin binding	0.0027273	15	873	0.017	BRCA1 FANCB BRCA2 GLI1 SKA2 RP1 KIF18A KLC2 RACGAP1 HOOK1 CENPJ BIRC5 TUBGCP3 KIF2C DYNC1I1	0	0	UP in siEF&EEF	9719	response to endogenous stimulus	0.00027082	80	1778	0.044	ROBO2 PTPRU SLC27A1 OXTR BTG1 FHL2 PLOD3 PLAT ADM VLDLR SLC2A8 ALDH2 BSG LEPR NEFL CCN1 IL6R RGS9 JUNB PDK1 CTSB ATP6V0E1 ANXA3 GPX3 SPHK1 ITGA2 SERPINF1 IGFBP2 PRKCA F3 PGF TGFBR1 TGFBR3 MMP14 ADAM17 GAL LOX PRKAR1B VGF PRKAR1A TEP1 DDIT3 TXNIP ALDOC PPARA MFGE8 ND3 BIRC2 RHOQ ABCG1 PDGFA PIK3R3 LCAT AK4 FOXO4 PLD1 PTGS2 ADCY6 FOXO1 GNG4 PRKAR2B ERBB2 HMOX1 LDLR TGFB2 EIF2B2 NR1H3 MAPK15 ASS1 FO…	0	0
UP in EWS	31100	organ regeneration	0.0038205	6	437	0.013	SOCS1 ANGPT2 ANXA3 LIF ADM CCN1	0	0	UP in siEF	45765	regulation of angiogenesis	0.00096184	19	1392	0.013	BTG1 ANXA3 SPHK1 SERPINE1 VASH2 VASH1 TSPAN12 PTGS2 THBS1 F3 AQP1 RHOB EFNA1 COL4A2 ADORA2B ERBB2 HMOX1 ANGPTL2 CCL2	0	0	DN in EWS								0	0	DN in siEF	77	DNA damage checkpoint	0.0027634	11	873	0.012	BLM BRIP1 TIPIN CCND1 CHEK2 PLK1 BRCA1 CLSPN GTSE1 DTL TICRR	0	0	UP in siEF&EEF	6464	protein modification process	0.00027082	203	1778	0.114	TRIO UBE2L6 ZDHHC1 RPS6KA5 RPS6KA2 CCN1 PDK2 PDK1 ACVR1 EPHA4 PRKCD DAPK3 PRKCA MAPK8IP3 MAPK8IP1 PRKAR1B ASPHD1 KCTD10 TEP1 HECW2 ULK2 ASPHD2 ULK1 TTLL11 EPHA3 EPHA2 MTMR3 FUT11 UBE2J1 NUAK1 NUAK2 RNF217 DPH3 ST3GAL4 ST3GAL5 ST3GAL6 ST3GAL1 ABCA1 CDK17 PLK3 CDK18 CDK19 DMPK GADD45B PLK2 FN1 EIF2AK3 DCLK2 DCLK1 CYLD MEX3B RNF103 NCEH1 PTK7 FBXL2 PPT2 DDR1 PTPRU BTG1 PTPRJ PIGV TRIOBP PTPRG ING4 D…	0	0
UP in EWS	31214	biomineral formation	0.0038205	6	437	0.013	COL1A1 KLF10 GPNMB TUFT1 PTGS2 ASPN	0	0	UP in siEF	60429	epithelium development	0.0011014	48	1392	0.034	NRP1 COL18A1 ERRFI1 FOXC2 CD63 LAMA5 NOTCH3 CSF1 SEMA3C TGFB1I1 SEMA3A CTSZ PDGFB TNC SIX1 ADM BCL10 F11R CELSR1 PPL TGM1 SOCS3 EDNRA S100A16 PODXL RDH10 KDR SOX9 WNT3 NKX3-1 TGM2 JUN FZD2 SMAD3 EYA1 LMO4 FZD6 VEGFC EMP1 PGF EREG RGMA TGFBR2 GREM1 COL4A1 TXNIP ID3 CD44	0	0	DN in EWS								0	0	DN in siEF	9889	regulation of biosynthetic process	0.0029816	191	873	0.218	RB1 POP1 RAX IRS2 TTF2 IKZF2 SOX2 HMGN5 SALL1 SOX1 SALL2 POFUT1 MYB EPC1 ENPP1 DPF3 ARID2 TP63 ZNF560 TIPIN KCNH5 PRKCB SFMBT2 ZBTB37 USP2 RFX2 NPY1R POU3F1 PASK ISL1 POU3F2 WDR77 UHMK1 ZNF718 TIMELESS DNA2 CARD11 ASF1B KMT2D ZNF792 BLM DNMT1 SRCAP DLX5 PRKDC ARX CDCA7 ADRB1 PHB NOP9 BRIP1 INPP5D HLTF NACC1 ALX4 OTX2 NKX6-1 PPARGC1B ZNF300 NKX2-2 FZD1 ESRRA TRAP1 CDT1 EGR2 BCL11B ZBTB16 CAV1 EAF2…	0	0	UP in siEF&EEF	42692	muscle cell differentiation	0.00028473	28	1778	0.015	TNC CBY1 SYNE1 CSRP2 LMNA ERBB2 CAPN2 SPEG CCN1 SOX6 SNTA1 CDON ACVR1 CHRNB1 TCF7L2 CXADR TPM1 F2R DYRK1B MAPK12 VEGFA RCAN1 RCN1 BIN1 SDC1 MYH9 AGRN OBSL1	0	0
UP in EWS	1819	positive regulation of cytokine production	0.0038205	10	437	0.022	IL1B SERPINE1 BCL3 CASP1 IL20RB BCL10 PTGS2 THBS1 TLR3 TLR2	0	0	UP in siEF	8361	regulation of cell size	0.0011379	35	1392	0.025	NRP1 NDRG4 BTG1 SEMA3A FHL1 PDGFB SEMA3F CXCL16 TRO DNAJB2 GNG4 SPP1 PLXNA3 APC2 TGFB2 SMAD3 TNFRSF12A LAMB2 SPHK1 OSGIN1 ISLR2 EMP1 NGF DCLK1 TGFBR1 DCBLD2 GREM1 TGFBR3 DAB2 RRAGC ULK1 NUPR1 IL7R CRYAB HBEGF	0	0	DN in EWS								0	0	DN in siEF	46930	pore complex	0.0029816	13	873	0.014	NDC1 NUP205 NUP155 NUP210 RANGAP1 IPO7 IPO5 C5 NUP50 NUP35 NUP88 KPNA3 KPNB1	0	0	UP in siEF&EEF	30695	GTPase regulator activity	0.00029959	70	1778	0.039	BCAR3 GPSM1 DOCK6 ERRFI1 DOCK5 DOCK4 TRIO GDI1 DOCK9 RASGRF2 ARHGEF10L SIPA1L2 RCBTB2 WDR44 AKAP13 DOCK11 RGS2 ARHGAP42 MCF2L PSD3 DENND5A EVI5L RGS9 ARFGEF3 TBC1D10A PLEKHG1 ANXA2 SH2D3A PLEKHG5 ARHGEF17 TBC1D9 GMIP ARFGAP3 TIAM2 TBC1D2 RASA3 TBC1D4 ARHGEF3 RAPGEF2 ARHGEF4 RIN3 MAPRE3 TBC1D23 RIN2 SOS2 TBC1D19 RGS16 ASAP3 AGAP2 RHOBTB3 RASAL2 ARHGAP12 CYTH3 CYTH2 RHPN1 RGS20 TBC1D17 RILP SRGAP1 …	0	0
UP in EWS	43434	response to peptide hormone stimulus	0.0038205	14	437	0.032	FOXC2 BTG1 PDGFB ADM VLDLR NGF HDAC9 COL1A1 SOCS1 VGF TRIB3 CCN2 CCN1 TLR2	0	0	UP in siEF	48704	embryonic skeletal system morphogenesis	0.0011858	15	1392	0.01	TBX1 FOXC2 DLX2 SMAD3 EYA1 PRRX1 SIX1 TGFBR1 TGFBR2 ZEB1 COL2A1 CHST11 RDH10 HOXB8 SCG2	0	0	DN in EWS								0	0	DN in siEF	48731	system development	0.0029864	157	873	0.179	RB1 DGKG SH3GL3 POP1 CCNF RTKN2 RAX IRS2 TTF2 CLDN1 CDC20 SOX2 SALL1 SOX1 CCND1 BMPER POFUT1 ENPP1 DPF3 TP63 PCDHAC2 EPHA7 UNC5A USP2 POU3F1 POU3F2 WDR77 UHMK1 OLFM1 CACNB2 TIAM1 ARC OLFM3 PKP2 TIMELESS FKBP4 CARD11 FREM2 BLM ENPEP SLC26A2 DLX5 PRKDC HTRA3 ARX SLC1A3 THY1 BHLHE22 KALRN CD79A CCNB1 RACGAP1 FUT9 ALX4 OTX2 LRRC4C NKX6-1 ASIC2 NKX2-2 PLK4 FZD1 ESRRA NGFR EGR2 BCL11B FZD4 ZBTB16 XRCC2…	0	0	UP in siEF&EEF	51174	regulation of phosphorus metabolic process	0.00032705	86	1778	0.048	CDKN1C ERRFI1 BMPR2 FLT1 CSF1 CD81 DGKA VLDLR SPRED3 SPRED1 EDNRA CASP3 ADORA1 PIM1 NCK2 MAP3K6 IL6R MAP3K5 PDK1 APC2 TSPYL2 CARD10 SPHK1 ITGA2 STRADB ITGA1 PRKCD F2R PRKCA DUSP8 MAPK8IP3 TGFBR1 MAPK8IP1 TGFBR2 ERN1 ADAM17 RCN1 PRKAR1B ADORA2B PRKAR1A TEP1 PARD3 CNKSR3 ITGA5 TRIB2 SDC4 LRP1 PDGFA BCL10 PPOX ADCY6 HSP90B1 GNAI2 ATXN1 PRKAR2B ERBB2 SH3BP5 APOE S1PR2 CDKN2D JUN TGFB2 MAP3K1 PPP1R14C…	0	0
UP in EWS	9887	organ morphogenesis	0.0040382	31	437	0.07	ERRFI1 NRP1 CSRNP1 FOXC2 TUFT1 FHL1 PDGFB PDGFA ADM BCL10 SOBP LFNG TGM1 SOCS1 CCN2 MSX1 CCN1 NKX3-1 PDGFRA TGFB2 ANGPT2 ANXA3 FZD6 LIF VEGFC KLF4 GEM DCN COL1A1 GREM1 PTX3	0	0	UP in siEF	48520	positive regulation of behavior	0.0012037	13	1392	0.009	SMAD3 CXCL8 SERPINE1 PDGFB VEGFC THBS1 F3 KDR F2RL1 CDH13 CCL2 IL6R SCG2	0	0	DN in EWS								0	0	DN in siEF	80090	regulation of primary metabolic process	0.0031077	218	873	0.249	RB1 POP1 RAX IKZF2 CDC20 SOX2 SOX1 PSMD3 MYB EPC1 DPF3 FBXO5 TP63 TIPIN PRKCB SFMBT2 RFX2 PASK ISL1 WDR77 UHMK1 ZNF718 DNA2 ASF1B PIF1 SRCAP PRKDC ARX CDCA7 THY1 BRIP1 HLTF ALX4 PPARGC1B NKX2-2 FZD1 TRAP1 CDT1 EGR2 BCL11B PLK1 EAF2 NFATC3 NR0B1 IGF1 PA2G4 GDF6 FLI1 ID2 AGO2 REL HOXD4 HOXD3 RCOR1 HOXD8 ZNF135 EZH2 TP73 BARHL2 AHCTF1 CSRNP3 SUV39H1 BRCA1 HOXC12 BRCA2 GLI1 CHAF1B CHAF1A MLX FEZF1 TC…	0	0	UP in siEF&EEF	19220	regulation of phosphate metabolic process	0.00032705	86	1778	0.048	CDKN1C ERRFI1 BMPR2 FLT1 CSF1 CD81 DGKA VLDLR SPRED3 SPRED1 EDNRA CASP3 ADORA1 PIM1 NCK2 MAP3K6 IL6R MAP3K5 PDK1 APC2 TSPYL2 CARD10 SPHK1 ITGA2 STRADB ITGA1 PRKCD F2R PRKCA DUSP8 MAPK8IP3 TGFBR1 MAPK8IP1 TGFBR2 ERN1 ADAM17 RCN1 PRKAR1B ADORA2B PRKAR1A TEP1 PARD3 CNKSR3 ITGA5 TRIB2 SDC4 LRP1 PDGFA BCL10 PPOX ADCY6 HSP90B1 GNAI2 ATXN1 PRKAR2B ERBB2 SH3BP5 APOE S1PR2 CDKN2D JUN TGFB2 MAP3K1 PPP1R14C…	0	0
UP in EWS	31325	positive regulation of cellular metabolic process	0.0041913	42	437	0.096	CSRNP1 FOXC2 MAML2 EPAS1 CEBPG EBI3 CITED4 PDGFB GLIS3 PDGFA BCL10 PTGS2 FOXO3 ETS1 THBS1 ICAM1 ARNTL HMOX1 SOX8 CCN2 MSX1 CCN1 PDGFRA JUN MPP4 ANXA3 LIF VEGFC FOS NR4A2 HOXB9 KLF5 DDIT3 IL1B IRF1 BCL3 TRIB3 PTX3 TRIB1 TLR3 TLR2 CREB5	0	0	UP in siEF	31093	platelet alpha granule lumen	0.0012588	11	1392	0.007	CFD TGFB2 SPARC PDGFB FN1 PDGFA VEGFC SERPING1 A2M THBS1 THBS3	0	0	DN in EWS								0	0	DN in siEF	33261	regulation of S phase	0.0032984	7	873	0.008	RB1 CDT1 TIPIN TIMELESS RCC1 FANCB BRCA2	0	0	UP in siEF&EEF	60589	nucleoside-triphosphatase regulator activity	0.00032963	71	1778	0.039	BCAR3 GPSM1 DOCK6 ERRFI1 DOCK5 DOCK4 TRIO GDI1 DOCK9 RASGRF2 ARHGEF10L SIPA1L2 RCBTB2 WDR44 AKAP13 DOCK11 RGS2 ARHGAP42 MCF2L PSD3 DENND5A EVI5L RGS9 ARFGEF3 TBC1D10A PLEKHG1 ANXA2 SH2D3A PLEKHG5 ARHGEF17 TBC1D9 GMIP ARFGAP3 TIAM2 DNAJC1 TBC1D2 RASA3 TBC1D4 ARHGEF3 RAPGEF2 ARHGEF4 RIN3 MAPRE3 TBC1D23 RIN2 SOS2 TBC1D19 RGS16 ASAP3 AGAP2 RHOBTB3 RASAL2 ARHGAP12 CYTH3 CYTH2 RHPN1 RGS20 TBC1D17 RILP …	0	0
UP in EWS	302	response to reactive oxygen species	0.0043832	9	437	0.02	COL1A1 JUN DUSP1 DDIT3 SERPINE1 TXNIP HMOX1 FOS KLF2	0	0	UP in siEF	44444	cytoplasmic part	0.00133	468	1392	0.336	PATJ SERPINE2 ZFYVE1 SCAMP5 LACTB COMTD1 TDO2 CREB3L1 CREB3L2 AP1S2 CYP1B1 TMEM8B CHGB CUBN PRKCD FNDC3B CH25H BCAM PRKAR1B ASPHD1 ETHE1 TXNIP SERPING1 ASPHD2 MYL9 OPTN RNF122 CFD NLRX1 PDGFB PDGFA BCL10 CHST11 EPB41L1 RDH10 PDGFC MYO6 S100A13 HMOX1 ST3GAL5 CHST14 ABCA1 JUN JUP FZD5 FUCA1 ABCA3 EDEM2 EIF2AK3 FN1 NFATC2 FOSL1 EHD1 GNPTG EHD2 CYLD EHD3 MEX3B RNF103 AGO4 GIPC1 SFXN3 SSPN MYOM1 HEXA …	0	0	DN in EWS								0	0	DN in siEF	10605	negative regulation of macromolecule metabolic process	0.0036779	63	873	0.072	RB1 SUV39H1 RAX BUB1B BRCA1 TTF2 HMGB1 BRCA2 CDC20 SOX2 SALL1 PSMD3 MLX EPC1 ENPP1 FBXO5 TP63 PRMT6 FOXD3 HELLS TIPIN RBM15 USP2 UBE2E1 PAX5 SMC1A RBL1 PAX9 TIMELESS ZMYND11 ANAPC1 BLM PSMD12 DNMT1 PHB PURB CCNB1 CDC45 CUX2 INPP5D NACC1 E2F1 IGF2BP1 PAIP2 TAF9B FZD1 SUZ12 CDT1 ZBTB16 CAV1 EAF2 NR0B1 PA2G4 FANCB VAX1 POU4F2 CENPF LIN28B WT1 ID2 AGO2 HOXD8 MAD2L1	0	0	UP in siEF&EEF	7409	axonogenesis	0.0003365	37	1778	0.02	RTN4R ROBO2 NRP1 NUMBL NRP2 STXBP1 SEMA3A SEMA3B EFNA5 CELSR3 GLI2 ALCAM EFNB3 KIF5C ERBB2 NEFL NRCAM APOE PLXNA3 EPHA4 UNC5B LAMB2 UNC5C PRKCA L1CAM MAPK8IP3 DCLK1 NR4A2 KLF7 RIT1 VCAN RTN4RL1 PARD3 ULK2 B3GNT2 ULK1 CHST3	0	0
UP in EWS	33673	negative regulation of kinase activity	0.0043863	10	437	0.022	RGS4 ERRFI1 DUSP2 GADD45B GADD45A IL1B TRIB3 PKIG DUSP8 TRIB1	0	0	UP in siEF	10810	regulation of cell-substrate adhesion	0.00134	14	1392	0.01	COL26A1 SMAD3 SDC4 CSF1 NID1 THBS1 COL1A1 MMP14 CCDC80 CDK6 SPP1 KDR CDH13 CCN1	0	0	DN in EWS								0	0	DN in siEF	30154	cell differentiation	0.0038205	114	873	0.13	RB1 DGKG POP1 CDC20 SOX2 SALL1 SOX1 CCND1 FBXO5 TP63 EPHA7 UNC5A PAQR5 KNL1 POU3F1 POU3F2 WDR77 UHMK1 CACNB2 TIAM1 OLFM3 PSME4 FKBP4 CARD11 ASF1B BLM DLX5 PRKDC HTRA3 ARX SLC1A3 ADRB1 THY1 BHLHE22 KALRN ACAT2 CD79A CCNB1 RACGAP1 OTX2 LRRC4C NKX6-1 NKX2-2 PLK4 FZD1 NGFR EGR2 BCL11B FZD4 ZBTB16 XRCC2 CAV1 DCDC2 NR0B1 FANCC IGF1 FANCB FANCG IGSF10 DAB1 ARTN HOOK1 ID2 CSPG5 SFXN1 STRN HOXD3 TP73 RET …	0	0	UP in siEF&EEF	9725	response to hormone stimulus	0.00034223	73	1778	0.041	ROBO2 PTPRU SLC27A1 OXTR BTG1 FHL2 PLOD3 PLAT ADM VLDLR SLC2A8 ALDH2 BSG LEPR NEFL CCN1 IL6R RGS9 JUNB PDK1 CTSB ANXA3 GPX3 SPHK1 ITGA2 SERPINF1 IGFBP2 PRKCA F3 PGF TGFBR1 TGFBR3 MMP14 GAL LOX PRKAR1B VGF PRKAR1A TEP1 TXNIP PPARA MFGE8 ND3 RHOQ ABCG1 PDGFA PIK3R3 LCAT FOXO4 PLD1 PTGS2 ADCY6 FOXO1 GNG4 PRKAR2B ERBB2 HMOX1 LDLR TGFB2 EIF2B2 NR1H3 MAPK15 ASS1 FOSL1 COL1A1 FABP3 DLC1 SDC1 ALPL CD24 B…	0	0
UP in EWS	7584	response to nutrient	0.0045028	13	437	0.029	VCAM1 DUSP1 PDGFA VLDLR PTGS2 COL1A1 DDIT3 STC2 IL1B HSD17B2 CYP1A1 HMOX1 A2M	0	0	UP in siEF	31674	I band	0.00134	14	1392	0.01	JUP LMO4 ACTN1 FHL2 NEXN CACNA1C JPH2 ANKRD1 DMD FLNC CCN1 CRYAB TRIM54 OBSL1	0	0	DN in EWS								0	0	DN in siEF	51128	regulation of cellular component organization	0.0042362	46	873	0.052	PIF1 BARHL2 DNMT1 POP1 ITGB2 CCNF THY1 PIK3R1 BRCA1 HMGB1 PKMYT1 SKA3 NTN1 KALRN SKA2 CDC20 FGD4 CCNB1 SACS RCC1 LRRC4C BUB1 DLGAP5 MDN1 PLK4 NGFR GABBR1 BORA EGF DCC CAV1 PLA2G4A CCK IGF1 PAX5 POU3F2 MTOR CENPE TIAM1 TPX2 CENPF ESPL1 TMSB15A UBE2N KIF20B FKBP4	0	0	UP in siEF&EEF	31226	intrinsic to plasma membrane	0.00034601	165	1778	0.092	SCARB2 OXTR CD81 CELSR1 IL27RA EPS8 GPR176 EDNRA LAMP1 SCN9A PALM ADORA1 LEPR NRCAM IL6R SLC16A3 SLC16A4 IL13RA1 ACVR1 CHRNB1 EPHA4 CXADR IL4R IL11RA F2R HLA-B HLA-C CNPY2 CYBA HLA-A ATP1B1 KCTD5 ADAM17 BCAM KCTD10 SCN8A KCTD11 ROR1 ROR2 KCTD17 KCTD15 EPHA3 ABCG1 EPHA2 NOTCH3 PTGFR CD151 SDC4 SDC2 EFNA5 SLC5A3 SYNGR1 SYNGR2 EFNB3 ANKH TSPAN9 PODXL TSPAN4 ST3GAL5 KCNMB4 ABCA1 FZD2 FZD5 FZD6 SLC33A…	0	0
UP in EWS	43620	regulation of transcription in response to stress	0.0046275	3	437	0.006	EPAS1 DDIT3 HMOX1	0	0	UP in siEF	31344	regulation of cell projection organization	0.0013496	24	1392	0.017	APC2 RTN4R NRP1 TNFRSF12A METRN BRI3 SPHK1 SEMA3A ISLR2 SEMA3F NGF TGFBR1 PTPRG EFNA1 CDH2 PODXL SPP1 CDC42EP1 PLXNB1 ULK1 APOE LZTS1 RHOQ PLXNA3	0	0	DN in EWS								0	0	DN in siEF	34622	cellular macromolecular complex assembly	0.0044943	31	873	0.035	NUP205 AHCTF1 HJURP MACROH2A2 CENPA HSPD1 PREX1 CHAF1B TUBA1B CHAF1A TGS1 COX11 FBXO5 NDC1 HELLS SHPRH WDR77 TICRR CENPE ANLN DIAPH1 CENPF UBE2S CENPJ TCP1 GEMIN4 TSR1 GEMIN5 FKBP4 ASF1B MCM2	0	0	UP in siEF&EEF	16301	kinase activity	0.00035135	110	1778	0.061	TRIO DGKA STK19 FGFRL1 STK10 RPS6KA5 RPS6KA2 PIM1 PIP4K2A MAP3K6 PDK2 MAP3K5 PDK1 ACVR1 EPHA4 CDKL5 PRKCD DAPK3 DYRK1B PRKCA PDGFRL ERN1 MAPKAPK2 ULK2 ROR1 ULK1 ROR2 EPHA3 EPHA2 CFD PFKFB3 AK1 LTBP4 PIK3R3 AK4 LTBP1 STK3 NUAK1 EFNB3 NUAK2 IRAK2 ABL2 NEK8 CDK17 FN3K PLK3 CDK18 CDK19 TGFB2 DMPK NEK6 PLK2 NEK7 EIF2AK3 CRIM1 DCLK2 IGF2R DCLK1 FER CDK6 PTK7 MAP3K10 ADCK5 MAP3K14 FGFR3 FGFR1 DDR1 NRP1 …	0	0
UP in EWS	30246	carbohydrate binding	0.0046834	21	437	0.048	COLEC12 MANBA SERPINE2 ATRNL1 COL25A1 FSTL1 THBS1 DCN ADAMTS3 GPNMB LIPH COL5A3 RSPO2 RSPO3 PTX3 CCN2 NPTX2 GAL3ST2 CCN1 HBEGF TLR2	0	0	UP in siEF	48706	embryonic skeletal system development	0.0013622	18	1392	0.012	TBX1 FOXC2 DLX2 SMAD3 EYA1 PRRX1 SIX1 TGFBR1 TGFBR2 COL1A1 ZEB1 COL2A1 HOXB9 CHST11 RDH10 HOXB8 SCG2 NKX3-2	0	0	DN in EWS								0	0	DN in siEF	3690	double-stranded DNA binding	0.0047055	14	873	0.016	FOXD3 BLM FEN1 PCNA HLF ZBTB16 NR0B1 TTF2 HMGB1 RAD51AP1 PURB NEIL3 WT1 TP63	0	0	UP in siEF&EEF	7169	transmembrane receptor protein tyrosine kinase signaling pathway	0.00035705	43	1778	0.024	DDR1 ARF4 FOXC1 BMPR2 FLT1 PDGFA PIK3R3 PLAT PTPRJ FOXO4 FOXO1 PTPRG SLC2A8 EPS8 SGPL1 RPS6KA5 EFNB3 PDGFC ERBB2 NCK2 MPZL1 CAST EPHA4 EIF2AK3 ARID5B MAPK8IP2 FRS3 VEGFA EFNA1 MYO1E ADAM17 TEP1 TXNIP ROR1 ROR2 AGRN FGFR3 BCAR1 EPHA3 RHOQ FGFR1 EPHA2 HBEGF	0	0
UP in EWS	46982	protein heterodimerization activity	0.0047963	15	437	0.034	JUN TGFB2 EPAS1 ITGA1 CEBPG PDGFB PDGFA FOS NR4A2 SDCBP IRAK2 CCN1 ABCG1 BOK TLR2	0	0	UP in siEF	30336	negative regulation of cell migration	0.001434	16	1392	0.011	PTPRU CD63 IGFBP5 IGFBP3 SEMA3A TPM1 PTPRO SERPINE1 PDGFB VASH1 THBS1 SMAD7 GREM1 ADORA1 HMOX1 APOE	0	0	DN in EWS								0	0	DN in siEF	45934	negative regulation of nucleobase, nucleoside, nucleotide and nucleic acid metabolic process	0.0048414	47	873	0.053	RB1 BLM DNMT1 SUV39H1 BRCA1 TTF2 HMGB1 PHB BRCA2 SOX2 PURB CDC45 SALL1 CUX2 NACC1 E2F1 MLX EPC1 TAF9B TP63 FZD1 PRMT6 SUZ12 FOXD3 HELLS CDT1 TIPIN RBM15 ZBTB16 CAV1 USP2 EAF2 NR0B1 PA2G4 PAX5 FANCB SMC1A VAX1 POU4F2 CENPF RBL1 WT1 ID2 PAX9 TIMELESS ZMYND11 HOXD8	0	0	UP in siEF&EEF	44087	regulation of cellular component biogenesis	0.00038504	34	1778	0.019	ROBO2 OXTR SDC4 STXBP1 AVIL CAPG AHR CORO1A CLU TRIOBP AMOT CDC42 DNAJB2 CAPZB PODXL TMSB4X NCK2 TMSB10 MAP3K1 GSN SMAD3 TPM1 PRKCA SORBS3 TGFBR1 MMP14 PINK1 TEP1 CDC42EP4 DLC1 CDC42EP1 NF2 AGRN RHOQ	0	0
UP in EWS	5518	collagen binding	0.0049465	6	437	0.013	COL5A3 ITGA1 PDGFB PDGFA THBS1 DCN	0	0	UP in siEF	23034	intracellular signaling pathway	0.0014493	127	1392	0.091	RAB3B PATJ OXTR CD81 DGKA FGF1 RGS4 EDNRA RGS3 RPS6KA2 ADORA1 FBXO6 MAP3K6 CCN1 TGM2 CARD10 PRKCD F2R BHLHA15 MAPK8IP2 GEM MAPK8IP1 RAB32 RAB30 RAB31 RAB36 RRAGC DDIT3 ULK1 ROR2 RIN2 SCG2 CFD SHC2 INSIG2 INSIG1 PLD1 RHOBTB1 SOCS3 HRH1 SOCS1 IRAK2 MYO6 HMOX1 APOE RALGDS ABCA1 FZD2 GADD45B HSPA5 WFS1 EIF2AK3 RABL2A RAB27A ARHGAP29 NFATC1 CORO2A EFNA1 RCAN1 COL1A2 BCL3 PLXNB1 BCAR3 CALCOCO1 FLT1 CXC…	0	0	DN in EWS								0	0	DN in siEF	5829	cytosol	0.0049252	93	873	0.106	POP1 BUB1B IRS2 ENO2 GLI1 PIK3CG ALKBH8 ARHGAP4 BEST1 CDC20 SOX2 RPTOR PREX1 LIPE XPO1 CCND1 PTTG1 PDE4A FBXO5 AP1S3 CHUK ACTN2 PRKCB CAD ARHGEF16 UBE2E1 NPY1R PLA2G4A KMO CKAP5 VAV1 SLC7A5 TIAM1 ARC TCP1 GEMIN4 ATG4C BIRC5 GEMIN5 PRKD1 FKBP4 STEAP2 ANAPC1 KPNB1 CARD11 ITGB3BP CDCA3 PDE1B PDE1A AKAP7 THY1 PIK3R1 KALRN HSPD1 FGD4 CCNB1 NDOR1 PDF KLC2 ORC1 INPP5D MFN2 NUP88 ECT2 CCT5 VARS1 PLK4 NGF…	0	0	UP in siEF&EEF	7264	small GTPase mediated signal transduction	0.00040005	53	1778	0.029	BCAR3 RAB3B ARF4 GDI1 RND3 CCN1 PDK1 RAB8B SH2D3A RRAS2 RHOC GEM RHOB ARL4C RAB32 ARL4A RAB30 RAP2B RAB31 RAB36 RRAGC CDC42EP4 MAPKAPK2 ARHGEF3 RAPGEF2 CDC42EP1 ULK1 RIN2 SOS2 ARL8A ARF5 RHOQ SHC2 RAB5B ARL3 AGAP2 PLD1 RHOBTB1 CDC42 RAB40B HMOX1 APOE RALGDS ABCA1 RABL2A RAB27A ARHGAP29 MAPK12 MAPK11 RIT1 ARHGAP31 RAB15 RGL2	0	0
UP in EWS	45429	positive regulation of nitric oxide biosynthetic process	0.0050592	5	437	0.011	IL1B PTX3 PTGS2 ICAM1 TLR2	0	0	UP in siEF	904	cell morphogenesis involved in differentiation	0.0014656	37	1392	0.026	RTN4R NRP1 COL18A1 SPON2 LAMA5 NOTCH3 SDC2 SEMA3A SEMA3B EFNA5 CELSR3 ALCAM KIF5C TUBB3 ERBB2 APOE SOX9 PLXNA3 EPHA4 TGFB2 UNC5B LAMB2 FN1 UNC5C L1CAM DKK1 DCLK1 NR4A2 TGFBR3 KLF7 DAB2 VCAN RTN4RL1 S100A6 ULK2 S100A4 ULK1	0	0	DN in EWS								0	0	DN in siEF	5814	centriole	0.0050687	8	873	0.009	PLK4 CENPJ CCNF SASS6 BIRC5 TUBGCP3 CEP55 LRRCC1	0	0	UP in siEF&EEF	7044	cell-substrate junction assembly	0.00042362	12	1778	0.006	LAMA5 CD151 ITGB4 LAMB2 ACTN1 DLC1 ITGA6 ITGA5 LAMC1 AJUBA PLEC PDK1	0	0
UP in EWS	44449	contractile fiber part	0.0053488	10	437	0.022	MYOM1 JPH2 SYNM SDC4 TNNT1 ANKRD1 DMD NEB CACNA1C CCN1	0	0	UP in siEF	48754	branching morphogenesis of a tube	0.0014813	19	1392	0.013	NRP1 FOXC2 LAMA5 NOTCH3 EYA1 CSF1 CTSZ SIX1 PGF TGFBR2 GREM1 MMP14 EDNRA RDH10 MGP KDR SPRY2 CD44 NKX3-1	0	0	DN in EWS								0	0	DN in siEF	42127	regulation of cell proliferation	0.0053808	65	873	0.074	RB1 RTKN2 RAX IRS2 ADRA1D BRCA1 FOXM1 BRCA2 GLI1 CDC20 SOX2 PNP CCND1 TP63 CER1 POU1F1 TIPIN SYK NPY5R DDX11 PLA2G4A SSTR1 POU3F2 WDR77 DTL CARD11 KMT2D BLM DNMT1 DLX5 ARX CDCA7 HOXD13 PHB NTN1 CCNB1 PDF ERBB4 INPP5D NACC1 MFN2 E2F3 UTP20 E2F7 ESRRA SUZ12 NGFR GDF11 GABBR1 BCL11B EGF ZBTB16 CAV1 FANCA CCK IGF1 FANCB VAX1 MTOR WT1 CDK4 ID2 STRN FGFR4 CDKN3	0	0	UP in siEF&EEF	43122	regulation of I-kappaB kinase/NF-kappaB cascade	0.00049266	29	1778	0.016	TRAF3IP2 GOLT1B SLC44A2 TRADD NOD1 BCL10 CXXC5 LITAF TSPAN6 S100A13 HMOX1 CIR1 TGM2 NEK6 PLK2 PLEKHG5 CARD9 F2R SHISA5 MIB2 TRAF1 RHOC PINK1 C18ORF32 MAP3K14 SQSTM1 TMEM9B MYD88 BIRC2	0	0
UP in EWS	2252	immune effector process	0.0055824	11	437	0.025	ANXA3 BCL3 FHL1 CEBPG SERPING1 PTX3 BCL10 TLR3 CD55 TNFSF13B ICAM1	0	0	UP in siEF	32963	collagen metabolic process	0.0015102	10	1392	0.007	COL1A1 MMP11 COL3A1 ADAMTS3 TNXB ADAM15 COL5A1 MMP2 TRAM2 MMP10	0	0	DN in EWS								0	0	DN in siEF	45449	regulation of transcription	0.005465	166	873	0.19	RB1 POP1 RAX TTF2 IKZF2 SOX2 HMGN5 SALL1 SOX1 SALL2 POFUT1 MYB EPC1 DPF3 ARID2 TP63 ZNF560 KCNH5 PRKCB SFMBT2 ZBTB37 USP2 RFX2 POU3F1 PASK ISL1 POU3F2 WDR77 ZNF718 TIMELESS CARD11 ASF1B KMT2D ZNF792 BLM DNMT1 SRCAP DLX5 PRKDC ARX CDCA7 PHB BRIP1 HLTF NACC1 ALX4 OTX2 NKX6-1 PPARGC1B ZNF300 NKX2-2 FZD1 ESRRA TRAP1 EGR2 BCL11B ZBTB16 CAV1 EAF2 NFATC3 NR0B1 IGF1 PA2G4 FANCB GDF6 FLI1 LIN28B NR4A3 CNO…	0	0	UP in siEF&EEF	16192	vesicle-mediated transport	0.00050948	91	1778	0.051	LMBR1L ARF4 GOLT1B SH3KBP1 DENND1A VLDLR LYST ASGR1 PCSK4 CXCL16 SCAMP5 MRC2 FTH1 ADORA1 AP1S2 TMED2 ITGAV TGM2 UNC13A ANXA3 WIPI1 ARFGAP3 MAPK8IP3 ANK1 DNM1 BET1L MAPK8IP1 RHOB DNM3 TRAPPC6A RAB31 BIN1 PLIN3 RIN3 KDELR2 ULK1 TSNARE1 KDELR3 MFGE8 RIN2 SQSTM1 OPTN ARF5 STX1A LLGL2 CFD COLEC12 STX12 LRP1 MGRN1 STXBP1 RHOBTB3 LIN7A CORO1A CPLX1 CYTH3 CYTH2 CECR2 SCFD2 MYO6 MICALL2 S100A13 STX5 SH3BP…	0	0
UP in EWS	44236	multicellular organismal metabolic process	0.0056035	6	437	0.013	COL1A1 ADAMTS3 MMP3 MMP19 MMP10 CLGN	0	0	UP in siEF	60284	regulation of cell development	0.0015798	38	1392	0.027	RTN4R NRP1 NOTCH3 DLX2 BTG1 SERPINE2 BRI3 TGFB1I1 SEMA3A SIX1 DTX1 SEMA3F PTPRG CDH2 BOC SPP1 TIMP2 SOX8 APOE SOX9 LZTS1 PLXNA3 APC2 TGFB2 SMAD3 EYA1 TNFRSF12A METRN SPHK1 IGFBP3 ISLR2 VEGFC NGF SMAD7 GREM1 EFNA1 PLXNB1 ULK1	0	0	DN in EWS								0	0	DN in siEF	51310	metaphase plate congression	0.005465	5	873	0.005	CENPE CENPF CCNB1 KIF18A CDCA5	0	0	UP in siEF&EEF	6468	protein amino acid phosphorylation	0.00051851	99	1778	0.055	TRIO CD81 STK19 STK10 RPS6KA5 RPS6KA2 ADORA1 PIM1 MAP3K6 PDK2 MAP3K5 PDK1 ACVR1 EPHA4 CDKL5 PRKCD DAPK3 F2R ADAM10 DYRK1B PRKCA MAPK8IP3 MAPK8IP1 ERN1 PRKAR1B MAPKAPK2 ULK2 ROR1 ULK1 ROR2 EPHA3 EPHA2 STK3 NUAK1 NUAK2 IRAK2 ABL2 NEK8 CDK17 PLK3 CDK18 CDK19 TGFB2 DMPK GADD45B NEK6 PLK2 NEK7 EIF2AK3 DCLK2 DCLK1 SMAD7 EFNA1 MEX3B FER CDK6 PTK7 MAP3K10 MAP3K14 FGFR3 FGFR1 DDR1 DYRK4 BMPR2 FLT1 PIK3CD …	0	0
UP in EWS	30193	regulation of blood coagulation	0.0056035	6	437	0.013	SERPINE2 SERPINE1 PDGFB PDGFA F2RL1 THBS1	0	0	UP in siEF	60205	cytoplasmic membrane-bounded vesicle lumen	0.0015985	11	1392	0.007	CFD TGFB2 SPARC PDGFB FN1 PDGFA VEGFC SERPING1 A2M THBS1 THBS3	0	0	DN in EWS								0	0	DN in siEF	43601	nuclear replisome	0.005465	5	873	0.005	POLD3 PURB POLA1 PRIM1 MCM3	0	0	UP in siEF&EEF	42325	regulation of phosphorylation	0.00053534	82	1778	0.046	CDKN1C ERRFI1 BMPR2 FLT1 CSF1 CD81 DGKA VLDLR SPRED3 SPRED1 EDNRA CASP3 ADORA1 PIM1 NCK2 MAP3K6 IL6R MAP3K5 PDK1 APC2 TSPYL2 CARD10 SPHK1 STRADB ITGA1 PRKCD F2R PRKCA DUSP8 MAPK8IP3 TGFBR1 MAPK8IP1 TGFBR2 ERN1 ADAM17 PRKAR1B ADORA2B PRKAR1A TEP1 PARD3 CNKSR3 ITGA5 TRIB2 SDC4 LRP1 PDGFA BCL10 PPOX ADCY6 GNAI2 ATXN1 PRKAR2B ERBB2 SH3BP5 APOE S1PR2 CDKN2D JUN TGFB2 MAP3K1 PPP1R14C SMAD3 RBPMS GADD45…	0	0
UP in EWS	30016	myofibril	0.0056644	10	437	0.022	MYOM1 JPH2 SYNM SDC4 TNNT1 ANKRD1 DMD NEB CACNA1C CCN1	0	0	UP in siEF	43627	response to estrogen stimulus	0.0016747	22	1392	0.015	PDGFRA OXTR IGFBP2 PDGFB PDGFA PTGS2 F3 MAPK15 TGFBR1 SOCS3 MMP14 GAL SOCS1 LEPR TXNIP HMOX1 CCN2 MFGE8 CCN1 CD24 CRYAB RGS9	0	0	DN in EWS								0	0	DN in siEF	30894	replisome	0.005465	5	873	0.005	POLD3 PURB POLA1 PRIM1 MCM3	0	0	UP in siEF&EEF	48666	neuron development	0.00058855	57	1778	0.032	CDKN1C ROBO2 NRP1 NRP2 ADM LAMC1 CLU CELSR3 GLI2 ALCAM KIF5C NEFL NRCAM EPHA4 UNC5B ITGA1 UNC5C PRKCA MAPK8IP3 VCAN RTN4RL1 PARD3 ULK2 B3GNT2 ULK1 CHST3 GAS7 RTN4R NUMBL SDC2 STXBP1 SEMA3A SEMA3B EFNA5 CLN5 EFNB3 MYO6 PSAP ERBB2 DMD STX3 APOE PLXNA3 TGFB2 LAMB2 LIF LAMB1 L1CAM DCLK1 VEGFA NR4A2 KLF7 RIT1 GNAQ PTX3 AGRN FGFR1	0	0
UP in EWS	7155	cell adhesion	0.0058074	33	437	0.075	NRP1 COL11A1 COL12A1 PIK3CD NEDD9 F11R RND3 THBS1 CELSR3 FBLN5 ICAM1 LOXL2 ISLR ARVCF GPNMB BOC S1PR1 ABL2 ITGB8 CCN2 CCN1 CXADR VCAM1 TNFRSF12A ITGA1 OMD NPNT RHOB PPFIBP1 COL5A3 COL8A1 CDH13 CD24	0	0	UP in siEF	48568	embryonic organ development	0.0016762	34	1392	0.024	FOXC2 DLX2 EPAS1 TSHZ1 SIX1 ADM SOBP SOCS3 CHST11 RDH10 MYO6 CCN1 NKX3-2 TBX1 TCF7L2 SMAD3 ITGA4 EYA1 PRRX1 LMO2 FZD6 LIF TGFBR1 TGFBR2 EFNA1 ZEB1 COL2A1 DDIT3 ID3 SPRY2 ROR2 HOXB8 PLCD3 SCG2	0	0	DN in EWS								0	0	DN in siEF	6275	regulation of DNA replication	0.0057613	12	873	0.013	CDT1 BLM TIPIN CDC45 PCNA IGF1 FANCB DNA2 BRCA2 GLI1 SMC1A TICRR	0	0	UP in siEF&EEF	32403	protein complex binding	0.00059218	45	1778	0.025	CD63 LAMA5 SYNM CLIC4 TNXB ITGB5 LRP1 CETN2 TRADD LTBP4 FBLN5 RTN4 FSTL3 DNAJB2 LGALS3 CDH2 ADORA1 TIMP2 RGS9 PDK1 CTSB ACVR1 DST ITGA2 ACTN1 ITGA1 ADAM10 ACTN4 L1CAM MAPK8IP2 FRS3 REC8 TGFBR1 SMAD7 PDP1 MYO1E ADAM17 COL5A1 ITGA6 ULK1 ITGA5 ERCC6 TLN2 MFGE8 ATP6V0D1	0	0
UP in EWS	50727	regulation of inflammatory response	0.0058105	9	437	0.02	IL1B SERPINE1 SERPING1 IL20RB PTGS2 A2M TAC1 TLR3 TLR2	0	0	UP in siEF	1968	fibronectin binding	0.0018535	6	1392	0.004	CCDC80 ITGA4 SDC4 CCN2 THBS1 FSTL3	0	0	DN in EWS								0	0	DN in siEF	3700	transcription factor activity	0.0057613	71	873	0.081	RB1 BARHL2 AHCTF1 CSRNP3 RAX TTF2 HMGB1 HOXC12 FOXM1 GLI1 SOX2 SALL1 SOX1 SALL2 PTTG1 MLX MYBL2 TP63 TCF19 FOXD3 POU1F1 PEG3 PAX5 POU3F1 ISL1 POU3F2 ETV4 KLF15 VAV1 PAX7 TFEC HLF DLX5 ARX HOXD13 PURB PDF CUX2 E2F1 E2F2 ALX4 E2F3 OTX2 NCAM2 NKX6-1 E2F7 E2F8 NKX2-2 ESRRA EGR2 BRF2 ZBTB16 NFYC NFATC3 PA2G4 VAX1 POU4F1 FLI1 POU4F2 TEC NR4A3 WT1 RFXAP REL HOXD4 TAF5 HOXD3 SMAP2 HOXD8 ZNF135 TP73	0	0	UP in siEF&EEF	42175	nuclear membrane-endoplasmic reticulum network	0.00063542	95	1778	0.053	GPSM1 TRAM1 RNF13 CLSTN3 RASGRF2 PLOD3 PIK3CD ANTXR2 PIGV HERPUD1 SYNE1 FADS3 HHAT SERP1 SPTLC2 CREB3L4 SEC61G CREB3L1 CREB3L2 ARL6IP5 CYP1B1 SEC61B RHBDF1 CERS4 IL15RA SCARA3 CERS6 SSR4 ACSL1 SSR2 RHBDF2 SHISA5 TAP1 SHISA2 TMC6 PJA2 ERN1 CREB3 DNAJC1 DPM3 TMX3 PITPNM1 CYP2U1 ASPH ASPHD1 ASPHD2 KDELR2 MAN1B1 KDELR3 ABCG1 RTN2 RTN1 SLC35D1 WBP1 INSIG2 UNC93B1 HM13 INSIG1 ITPR1 FURIN PLD1 PTGS2 SEZ…	0	0
UP in EWS	22610	biological adhesion	0.0059036	33	437	0.075	NRP1 COL11A1 COL12A1 PIK3CD NEDD9 F11R RND3 THBS1 CELSR3 FBLN5 ICAM1 LOXL2 ISLR ARVCF GPNMB BOC S1PR1 ABL2 ITGB8 CCN2 CCN1 CXADR VCAM1 TNFRSF12A ITGA1 OMD NPNT RHOB PPFIBP1 COL5A3 COL8A1 CDH13 CD24	0	0	UP in siEF	60325	face morphogenesis	0.0018535	6	1392	0.004	COL1A1 PDGFRA SGPL1 ASPH MMP2 ARID5B	0	0	DN in EWS								0	0	DN in siEF	51172	negative regulation of nitrogen compound metabolic process	0.0059118	47	873	0.053	RB1 BLM DNMT1 SUV39H1 BRCA1 TTF2 HMGB1 PHB BRCA2 SOX2 PURB CDC45 SALL1 CUX2 NACC1 E2F1 MLX EPC1 TAF9B TP63 FZD1 PRMT6 SUZ12 FOXD3 HELLS CDT1 TIPIN RBM15 ZBTB16 CAV1 USP2 EAF2 NR0B1 PA2G4 PAX5 FANCB SMC1A VAX1 POU4F2 CENPF RBL1 WT1 ID2 PAX9 TIMELESS ZMYND11 HOXD8	0	0	UP in siEF&EEF	5083	small GTPase regulator activity	0.00065158	52	1778	0.029	ERRFI1 DOCK4 TRIO GDI1 DOCK9 RASGRF2 ARHGEF10L RCBTB2 WDR44 AKAP13 MCF2L PSD3 DENND5A EVI5L ARFGEF3 TBC1D10A PLEKHG1 ANXA2 PLEKHG5 ARHGEF17 TBC1D9 GMIP ARFGAP3 TIAM2 TBC1D2 TBC1D4 ARHGEF3 RAPGEF2 ARHGEF4 MAPRE3 TBC1D23 RIN2 SOS2 TBC1D19 ASAP3 AGAP2 RHOBTB3 RASAL2 CYTH3 CYTH2 RHPN1 TBC1D17 RILP RALGDS RAB11FIP4 JUN IQSEC2 ARHGAP29 ADAP1 FER DLC1 RGL2	0	0
UP in EWS	43405	regulation of MAP kinase activity	0.0060221	12	437	0.027	RGS4 DUSP2 IL1B ITGA1 PDGFB TRIB3 S1PR2 DUSP8 TRIB1 CD24 THBS1 DRD4	0	0	UP in siEF	48598	embryonic morphogenesis	0.001886	47	1392	0.033	FOXC2 LAMA5 DLX2 FOXC1 CRABP2 LDB1 TGFB1I1 TSHZ1 SIX1 ECE1 ADM BCL10 CELSR1 SOBP SOCS3 CHST11 RDH10 MYO6 CCN1 NKX3-2 WNT3 CDON TBX1 TCF7L2 SMAD3 ITGA4 EYA1 PRRX1 LMO4 FZD6 VEGFC KLF4 DKK1 TGFBR1 RGMA TGFBR2 GREM1 EFNA1 UGDH BTD ZEB1 COL2A1 SPRY2 TPP1 ROR2 HOXB8 SCG2	0	0	DN in EWS								0	0	DN in siEF	35258	steroid hormone receptor binding	0.0059266	9	873	0.01	RB1 PSMC3IP PRKCB DDX54 NR0B1 STRN BRCA1 FKBP4 PPARGC1B	0	0	UP in siEF&EEF	43227	membrane-bounded organelle	0.00067299	917	1778	0.515	CHIC2 ZNF296 ALKBH7 ZFYVE1 SCAMP5 LACTB COMTD1 MLYCD SAMD11 TMEM8B ZNF287 GSTK1 GABARAPL1 MEF2C RFX3 ASPHD1 DDIT3 ETHE1 RBP1 TXNIP ASPHD2 OPTN ATF3 ZBTB8A NLRX1 CRABP2 FLII SHOX2 TPRG1L AGAP2 PDGFA PLA2G6 DYNC2LI1 PRKAR2B RDH10 PDGFC MYO6 GTF2IRD2B ABCA1 JUN JUP FUCA1 ABCA3 EDEM2 FN1 EIF2AK3 PBX3 PBX4 LARP6 PBX1 SFXN3 HYOU1 ACHE ARF4 ZNF251 ZNF490 HEXA JRKL PIGV LITAF TRIOBP BBC3 TMEM43 HEY1 TSPO…	0	0
UP in EWS	60323	head morphogenesis	0.0061892	4	437	0.009	COL1A1 CSRNP1 PDGFRA DKK1	0	0	UP in siEF	40007	growth	0.0019584	33	1392	0.023	FOXC2 NOTCH3 FOXC1 NDRG4 CSF1 FHL1 SERPINE1 PDGFB ADM PTGS2 FOXO3 CHST11 PLAU RDH10 SOX9 TGFB2 GSN SMAD3 IGFBP5 LAMB2 PLAUR EMP1 ARID5B DCLK1 EREG INHBE TGFBR3 RRAGC NINJ1 SPRY2 ULK1 NUPR1 IL7R	0	0	DN in EWS								0	0	DN in siEF	43065	positive regulation of apoptosis	0.0064	39	873	0.044	TOP2A RYR2 CSRNP3 PRKDC RAX BRCA1 HMGB1 BRCA2 KALRN ARHGAP4 HSPD1 PREX1 FGD4 SMPD1 CHEK2 INPP5D NACC1 ECT2 TP63 MAP2K6 NGFR WWOX EPHA7 GABBR1 DAPK1 DCC ZBTB16 MCF2 ARHGEF16 PLA2G4A CCK FANCB MMP9 POU4F1 VAV1 TIAM1 WT1 ITGB3BP TP73	0	0	UP in siEF&EEF	31300	intrinsic to organelle membrane	0.00067424	32	1778	0.017	RTN2 RTN1 SLC35D1 INSIG2 PEX11B ECE1 SGMS2 RFNG PPOX RTN4 SGPL1 SLC22A17 ST3GAL4 ST3GAL5 ST3GAL6 QSOX1 ST3GAL1 ABCD1 FIS1 HSPA5 WFS1 BNIP3 AMFR TAP1 ERN1 EXT2 DPM3 ASPH ASPHD1 ASPHD2 ST6GALNAC4 CHST2	0	0
UP in EWS	2683	negative regulation of immune system process	0.006206	9	437	0.02	GREM1 CD274 TGFB2 SERPING1 IL20RB HMOX1 PDCD1LG2 A2M THBS1	0	0	UP in siEF	50818	regulation of coagulation	0.0019584	12	1392	0.008	VKORC1 SERPINE2 ANXA2 PLAU SERPINE1 F2R PDGFB PDGFA F2RL1 APOE THBS1 F3	0	0	DN in EWS								0	0	DN in siEF	48869	cellular developmental process	0.0068236	115	873	0.131	RB1 DGKG POP1 CDC20 SOX2 SALL1 SOX1 CCND1 FBXO5 TP63 EPHA7 UNC5A PAQR5 KNL1 POU3F1 POU3F2 WDR77 UHMK1 CACNB2 TIAM1 OLFM3 PSME4 FKBP4 CARD11 ASF1B BLM DLX5 PRKDC HTRA3 ARX SLC1A3 ADRB1 THY1 BHLHE22 KALRN ACAT2 CD79A CCNB1 RACGAP1 OTX2 LRRC4C NKX6-1 NKX2-2 PLK4 FZD1 NGFR EGR2 BCL11B FZD4 ZBTB16 XRCC2 CAV1 DCDC2 NR0B1 FANCC IGF1 FANCB FANCG IGSF10 DAB1 ARTN HOOK1 ID2 CSPG5 SFXN1 STRN HOXD3 TP73 RET …	0	0	UP in siEF&EEF	5789	endoplasmic reticulum membrane	0.00067492	93	1778	0.052	GPSM1 TRAM1 RNF13 CLSTN3 RASGRF2 PLOD3 PIK3CD ANTXR2 PIGV HERPUD1 FADS3 HHAT SERP1 SPTLC2 CREB3L4 SEC61G CREB3L1 CREB3L2 ARL6IP5 CYP1B1 SEC61B RHBDF1 CERS4 IL15RA SCARA3 CERS6 SSR4 ACSL1 SSR2 RHBDF2 SHISA5 TAP1 SHISA2 TMC6 PJA2 ERN1 CREB3 DNAJC1 DPM3 TMX3 PITPNM1 CYP2U1 ASPH ASPHD1 ASPHD2 KDELR2 MAN1B1 KDELR3 ABCG1 RTN2 RTN1 SLC35D1 WBP1 INSIG2 UNC93B1 HM13 INSIG1 ITPR1 FURIN PLD1 PTGS2 SEZ6L2 PL…	0	0
UP in EWS	51781	positive regulation of cell division	0.0062437	6	437	0.013	TGFB2 PDGFD IL1B PDGFB PDGFA VEGFC	0	0	UP in siEF	45121	membrane raft	0.0019752	26	1392	0.018	CFD OPRD1 SLC27A1 SDC4 SLC2A1 BCL10 EFNA5 PTGS2 ADCY6 PODXL ERBB2 HMOX1 DMD CD55 CTSB ABCA1 PRNP MYOF F2R ATP1B1 TGFBR2 RTN4RL1 CDH13 CD24 BIRC2 RHOQ	0	0	DN in EWS								0	0	DN in siEF	31109	microtubule polymerization or depolymerization	0.0069686	4	873	0.004	KIF18A CENPJ KIF2C FBXO5	0	0	UP in siEF&EEF	43231	intracellular membrane-bounded organelle	0.0007079	916	1778	0.515	CHIC2 ZNF296 ALKBH7 ZFYVE1 SCAMP5 LACTB COMTD1 MLYCD SAMD11 TMEM8B ZNF287 GSTK1 GABARAPL1 MEF2C RFX3 ASPHD1 DDIT3 ETHE1 RBP1 TXNIP ASPHD2 OPTN ATF3 ZBTB8A NLRX1 CRABP2 FLII SHOX2 TPRG1L AGAP2 PDGFA PLA2G6 DYNC2LI1 PRKAR2B RDH10 PDGFC MYO6 GTF2IRD2B ABCA1 JUN JUP FUCA1 ABCA3 EDEM2 FN1 EIF2AK3 PBX3 PBX4 LARP6 PBX1 SFXN3 HYOU1 ACHE ARF4 ZNF251 ZNF490 HEXA JRKL PIGV LITAF TRIOBP BBC3 TMEM43 HEY1 TSPO…	0	0
UP in EWS	51348	negative regulation of transferase activity	0.0063407	10	437	0.022	RGS4 ERRFI1 DUSP2 GADD45B GADD45A IL1B TRIB3 PKIG DUSP8 TRIB1	0	0	UP in siEF	323	lytic vacuole	0.0019752	36	1392	0.025	CD63 IDUA BRI3 UNC93B1 HEXA CTSZ BCL10 LITAF CTSO DRAM1 GM2A CTSL LAMP3 PSAP SLC17A5 CTSF ARSD RILP CTSD SLC15A4 CTSB SLC36A1 CTSA HGSNAT CUBN MANBA FUCA1 GAA RAB27A CTNS SYT7 GALNS NPC2 GLB1 TPP1 SLC29A3	0	0	DN in EWS								0	0	DN in siEF	31503	protein complex localization	0.0069686	4	873	0.004	NDC1 BIRC5 FKBP4 MZT1	0	0	UP in siEF&EEF	16055	Wnt receptor signaling pathway	0.00074653	29	1778	0.016	PTPRU RARG CALCOCO1 LDB1 NXN TGFB1I1 KLHL12 SLC9A3R1 LRRFIP2 WNT3 SOX4 DACT1 APC2 TLE4 TCF7L2 FZD2 WNT5B FZD5 FZD7 FZD6 KREMEN1 FZD8 KREMEN2 CYLD TEP1 SDC1 HBP1 ROR2 CD24	0	0
UP in EWS	45786	negative regulation of cell cycle	0.0065139	13	437	0.029	PPP1R15A TGFB2 CXCL8 GADD45A NGF RUNX3 ETS1 THBS1 GEM RHOB DDIT3 SESN2 JMY	0	0	UP in siEF	5764	lysosome	0.0019752	36	1392	0.025	CD63 IDUA BRI3 UNC93B1 HEXA CTSZ BCL10 LITAF CTSO DRAM1 GM2A CTSL LAMP3 PSAP SLC17A5 CTSF ARSD RILP CTSD SLC15A4 CTSB SLC36A1 CTSA HGSNAT CUBN MANBA FUCA1 GAA RAB27A CTNS SYT7 GALNS NPC2 GLB1 TPP1 SLC29A3	0	0	DN in EWS								0	0	DN in siEF	43068	positive regulation of programmed cell death	0.0072034	39	873	0.044	TOP2A RYR2 CSRNP3 PRKDC RAX BRCA1 HMGB1 BRCA2 KALRN ARHGAP4 HSPD1 PREX1 FGD4 SMPD1 CHEK2 INPP5D NACC1 ECT2 TP63 MAP2K6 NGFR WWOX EPHA7 GABBR1 DAPK1 DCC ZBTB16 MCF2 ARHGEF16 PLA2G4A CCK FANCB MMP9 POU4F1 VAV1 TIAM1 WT1 ITGB3BP TP73	0	0	UP in siEF&EEF	48667	cell morphogenesis involved in neuron differentiation	0.00076091	38	1778	0.021	RTN4R ROBO2 NRP1 NUMBL NRP2 SDC2 STXBP1 SEMA3A SEMA3B EFNA5 CELSR3 GLI2 ALCAM EFNB3 KIF5C ERBB2 NEFL NRCAM APOE PLXNA3 EPHA4 UNC5B LAMB2 UNC5C PRKCA L1CAM MAPK8IP3 DCLK1 NR4A2 KLF7 RIT1 VCAN RTN4RL1 PARD3 ULK2 B3GNT2 ULK1 CHST3	0	0
UP in EWS	44243	multicellular organismal catabolic process	0.0069305	5	437	0.011	ADAMTS3 MMP3 MMP19 MMP10 CLGN	0	0	UP in siEF	31100	organ regeneration	0.0020196	11	1392	0.007	SOCS3 PTPRU SOCS1 ANXA3 AXL PTPRO LIF CCL2 ADM CCN1 TGFBR1	0	0	DN in EWS								0	0	DN in siEF	48468	cell development	0.0074866	51	873	0.058	RET DGKG CNTNAP2 POP1 HMGB1 BRCA2 SOX2 SALL1 SOX1 FBXO5 FEZF1 TP63 EPHA7 UNC5A DCC KNL1 POU3F1 POU3F2 UHMK1 CACNB2 OLFM3 HLF DLX5 PRKDC ARX SLC1A3 THY1 NTN1 KALRN PARD6B CCNB1 OTX2 NKX2-2 NGFR GDF11 EGR2 BCL11B ZBTB16 CCK FANCC IGF1 FANCB VAX1 POU4F1 POU4F2 FANCG MTOR WT1 HOOK1 STRN TP73	0	0	UP in siEF&EEF	51338	regulation of transferase activity	0.00076091	66	1778	0.037	CDKN1C ERRFI1 FLT1 CSF1 CD81 DGKA VLDLR SPRED3 SPRED1 EDNRA CASP3 ADORA1 PIM1 NCK2 MAP3K6 MAP3K5 PDK1 APC2 TSPYL2 CARD10 SPHK1 STRADB ITGA1 F2R PRKCA DUSP8 MAPK8IP3 TGFBR1 MAPK8IP1 TGFBR2 ERN1 ADAM17 PRKAR1B ADORA2B PRKAR1A TEP1 PARD3 TRIB2 SDC4 LRP1 PPOX ADCY6 GNAI2 PRKAR2B ERBB2 SH3BP5 APOE S1PR2 CDKN2D TGFB2 MAP3K1 GADD45B HSPA5 GADD45A EFNA1 KITLG GNAQ PDCD4 MAP3K10 SPRY2 TPP1 SERINC1 SPRY1 E…	0	0
UP in EWS	50729	positive regulation of inflammatory response	0.0070477	6	437	0.013	IL1B SERPINE1 PTGS2 TAC1 TLR3 TLR2	0	0	UP in siEF	12505	endomembrane system	0.0020303	151	1392	0.108	SLC27A1 CHPF GOLT1B CLSTN3 PLOD3 ANTXR2 GALNT10 AQP1 FADS3 SCAMP5 HHAT EDNRA CREB3L1 CREB3L2 ADORA1 AP1S2 CYP1B1 PHLDA1 IL15RA CUBN RSAD2 ACSL1 ENTPD7 HLA-A SHISA2 CH25H ADAM15 RAB36 CYP2U1 ASPHD1 S100A6 ASPHD2 ULK1 KDELR3 ABCG1 PTGES CFD RTN2 CD274 RTN1 INSIG2 INSIG1 SLC35D2 TMEM59L PLD1 SEZ6L2 PLD3 SLC9A3R2 UGCG SGPL1 BCL2L11 CHST11 RDH10 PDGFC MYO6 ST3GAL5 CHST14 SEC31B B4GALNT4 VAT1 SMAD3 FZD…	0	0	DN in EWS								0	0	DN in siEF	307	cyclin-dependent protein kinase holoenzyme complex	0.0077899	5	873	0.005	CCND3 PCNA CCND1 CDK4 BCCIP	0	0	UP in siEF&EEF	60429	epithelium development	0.00076749	58	1778	0.032	NRP1 COL18A1 ERRFI1 RARG CLIC4 B4GALT1 CSF1 TGFB1I1 CTSZ TNC SIX1 ADM F11R CELSR1 GLI2 TGM1 EDNRA CASP3 SOX9 NKX3-1 TGM2 ACVR1 LMO4 SHROOM3 PGF RGMA TGFBR2 COL4A1 HOXB4 TXNIP HOXB2 FREM2 VCL HOXB5 CD63 LAMA5 NOTCH3 SEMA3C SEMA3A TWIST1 BCL10 PODXL RDH10 PLXNA1 WNT3 TFAP2A JUN FZD2 SMAD3 EYA1 FZD6 VEGFC PBX1 VEGFA DLC1 ID1 ID3 FGFR1	0	0
UP in EWS	7179	transforming growth factor beta receptor signaling pathway	0.007187	7	437	0.016	KLF10 JUN TGFB2 GDF15 PDGFB PDGFA FOS	0	0	UP in siEF	51094	positive regulation of developmental process	0.0020327	48	1392	0.034	NRP1 OXTR BTG1 CSF1 SERPINE2 TSHZ3 TGFB1I1 SERPINE1 LPL SIX1 FGF1 PTGS2 FOXO3 ETS1 THBS1 AQP1 SOCS3 BOC HSF4 IL6R PDLIM7 APC2 JUN TGFB2 IL4R SMAD3 WNT5B TNFRSF12A METRN ANXA3 BAD SPHK1 IGFBP3 FNDC3B VASH2 LIF ISLR2 VEGFC NGF F3 RHOB TGFBR2 BMP1 ANGPTL2 PLXNB1 SPRY1 IL7R SCG2	0	0	DN in EWS								0	0	DN in siEF	10212	response to ionizing radiation	0.0077899	11	873	0.012	BLM CCND1 PRKDC FANCD2 XRCC2 CAV1 RAD54L BRCA1 FANCB BRCA2 TICRR	0	0	UP in siEF&EEF	5178	integrin binding	0.0007771	18	1778	0.01	LAMA5 TNXB ITGB5 DST ITGA2 ACTN1 ITGA1 LTBP4 ADAM10 ACTN4 L1CAM FBLN5 ADAM17 COL5A1 TIMP2 ITGA6 ITGA5 MFGE8	0	0
UP in EWS	43086	negative regulation of catalytic activity	0.0072159	18	437	0.041	OPRD1 ERRFI1 DUSP2 CSTA TGFB2 GADD45B GADD45A SERPINE1 DUSP8 THBS1 GNAI1 HERPUD1 RGS4 IL1B TRIB3 PKIG TRIB1 DRD4	0	0	UP in siEF	5773	vacuole	0.0020361	40	1392	0.028	CD63 IDUA BRI3 UNC93B1 HEXA CTSZ BCL10 LITAF MAP1LC3B CTSO DRAM1 MAP1LC3A GM2A CTSL LAMP3 PSAP SLC17A5 CTSF ARSD RILP CTSD SLC15A4 CTSB SLC36A1 CTSA HGSNAT CUBN MANBA FUCA1 GAA RAB27A CTNS WIPI1 SYT7 GALNS NPC2 GLB1 TPP1 ULK1 SLC29A3	0	0	DN in EWS								0	0	DN in siEF	6357	regulation of transcription from RNA polymerase II promoter	0.0080201	58	873	0.066	RB1 BARHL2 CSRNP3 BRCA1 TTF2 HMGB1 IKZF2 GLI1 SOX2 SALL1 EPC1 TP63 TCF19 FOXD3 RBM15 PRKCB USP2 PAX5 POU3F2 WDR77 RBL1 PAX9 TIMELESS ZMYND11 KMT2D DNMT1 HLF SRCAP PRKDC HOXD13 PSMC3IP BRIP1 HLTF E2F1 RBBP8 ALX4 TAF9B NKX6-1 PPARGC1B NKX2-2 ESRRA SUZ12 EGR2 BCL11B CAV1 NFYC NFATC3 NR0B1 IGF1 VAX1 POU4F1 POU4F2 TEC NR4A3 WT1 ID2 SMAP2 HOXD8	0	0	UP in siEF&EEF	43549	regulation of kinase activity	0.0007771	64	1778	0.035	CDKN1C ERRFI1 FLT1 CSF1 CD81 DGKA VLDLR SPRED3 SPRED1 EDNRA CASP3 ADORA1 PIM1 NCK2 MAP3K6 MAP3K5 PDK1 APC2 TSPYL2 CARD10 SPHK1 STRADB ITGA1 F2R PRKCA DUSP8 MAPK8IP3 TGFBR1 MAPK8IP1 TGFBR2 ERN1 ADAM17 PRKAR1B ADORA2B PRKAR1A TEP1 PARD3 TRIB2 SDC4 LRP1 PPOX ADCY6 GNAI2 PRKAR2B ERBB2 SH3BP5 APOE S1PR2 CDKN2D TGFB2 MAP3K1 GADD45B HSPA5 GADD45A EFNA1 KITLG GNAQ PDCD4 MAP3K10 SPRY2 SPRY1 ERCC6 NF2 CD24	0	0
UP in EWS	2544	chronic inflammatory response	0.0072159	3	437	0.006	VCAM1 IL1B THBS1	0	0	UP in siEF	43433	negative regulation of transcription factor activity	0.0022888	14	1392	0.01	TCF7L2 SP100 HR COMMD7 SMAD7 SIGIRR CYLD IRAK2 DDIT3 TNFSF4 PIM1 HMOX1 ID3 SCG2	0	0	DN in EWS								0	0	DN in siEF	10468	regulation of gene expression	0.0083897	181	873	0.207	RB1 POP1 RAX TTF2 IKZF2 SOX2 HMGN5 SALL1 SOX1 SALL2 POFUT1 MYB EPC1 DPF3 ARID2 TP63 ZNF560 KCNH5 PRKCB SFMBT2 ZBTB37 USP2 RFX2 POU3F1 PASK ISL1 POU3F2 WDR77 UHMK1 ZNF718 TIMELESS CARD11 ASF1B KMT2D ZNF792 BLM DNMT1 SRCAP DLX5 PRKDC ARX CDCA7 PHB MACROH2A2 BRIP1 CCNB1 HLTF NACC1 ALX4 OTX2 NKX6-1 PPARGC1B ZNF300 NKX2-2 FZD1 ESRRA NGFR TRAP1 EGR2 BCL11B ZBTB16 CAV1 EAF2 NFATC3 NR0B1 IGF1 PA2G4 FANCB…	0	0	UP in siEF&EEF	4674	protein serine/threonine kinase activity	0.00078001	68	1778	0.038	DYRK4 BMPR2 TRIO HSPB8 STK19 PKD2 AKAP13 STK10 DSTYK RPS6KA5 RPS6KA2 PIM1 SPEG MAP3K6 MAP3K5 PDK1 ACVR1 CDKL5 MST1 PRKCD DAPK3 DYRK1B PRKCA TGFBR1 TGFBR2 ERN1 TGFBR3 MAPKAPK2 ULK2 ULK1 SGK1 CAMK2D LTBP4 LTBP1 STK3 NUAK1 NUAK2 IRAK2 MKNK2 NEK8 CDK17 PLK3 CDK18 CDK19 TGFB2 MAP3K1 DMPK RIOK3 NEK6 PLK2 NEK7 EIF2AK3 DCLK2 MAPK15 DCLK1 MAPK12 HIPK2 MAPK11 PINK1 SNRK SBK1 CDK6 STK17A STK17B MAP3K10 ADCK…	0	0
UP in EWS	5488	binding	0.0072973	335	437	0.766	ERRFI1 IFITM2 SERPINE2 MAML2 SERPINE1 ZDHHC6 DDX60L BACH2 ICAM1 EPS8 ISLR LIPH KDR SOX8 CCN2 CCN1 CCNL1 IER3 CHGB EPHA4 CXADR MBNL2 WSB1 OMD ISLR2 DKK1 RUNX3 CYP27A1 CH25H HOXB9 RNF125 DAAM1 PPP1R3C DDIT3 HECW2 ARMC4 RBP1 TXNIP SERPING1 TRIB3 ALPK2 TRIB1 ATF3 RNF122 MT1E CDS1 SDC4 EPAS1 HHLA3 EBI3 PDGFB PDGFA TMTC1 BCL10 NEU4 ZNF829 NUAK2 APH1B RAB11FIP1 PDGFD STC2 HMOX1 MAP6 ARSD A2M S100A10 JUN…	0	0	UP in siEF	90048	negative regulation of transcription regulator activity	0.0022888	14	1392	0.01	TCF7L2 SP100 HR COMMD7 SMAD7 SIGIRR CYLD IRAK2 DDIT3 TNFSF4 PIM1 HMOX1 ID3 SCG2	0	0	DN in EWS								0	0	DN in siEF	10942	positive regulation of cell death	0.0083897	39	873	0.044	TOP2A RYR2 CSRNP3 PRKDC RAX BRCA1 HMGB1 BRCA2 KALRN ARHGAP4 HSPD1 PREX1 FGD4 SMPD1 CHEK2 INPP5D NACC1 ECT2 TP63 MAP2K6 NGFR WWOX EPHA7 GABBR1 DAPK1 DCC ZBTB16 MCF2 ARHGEF16 PLA2G4A CCK FANCB MMP9 POU4F1 VAV1 TIAM1 WT1 ITGB3BP TP73	0	0	UP in siEF&EEF	9890	negative regulation of biosynthetic process	0.00078219	94	1778	0.052	CDKN1C KDM5B PTPRU SLC27A1 RARG LDB1 CBY1 GLI2 ING4 EDNRA HEY1 TRPS1 PALM CIR1 ITGAV SOX8 SOX9 JARID2 SOX6 IL6R LMCD1 TSPYL2 KLF11 MEF2C ZHX3 TLE1 IGFBP5 CTNNBIP1 ARID5A RFX3 ARID5B PRKCA COMMD7 GEM SIGIRR ZEB1 ADORA2B RBP1 IRF2 IRF7 HOXB4 TXNIP PPARA TRIB2 JDP2 HBEGF DLX1 DLX2 LRP1 SATB2 PDGFA TWIST1 PBXIP1 TXN PPOX FOXO3 GLIS2 ATXN1 DNAJB5 NACC2 NRIP1 HSF4 IGF2BP2 MSX1 ZNF423 S100A11 CD276 TCF7…	0	0
UP in EWS	2694	regulation of leukocyte activation	0.0074408	13	437	0.029	CD274 VCAM1 EBI3 IL20RB BCL10 PDCD1LG2 THBS1 TNFSF13B IL1B HMOX1 CD24 TAC1 IL13RA1	0	0	UP in siEF	42476	odontogenesis	0.0023044	15	1392	0.01	PDGFRA LAMA5 DLX2 FOXC1 TGFB2 CSF1 TUFT1 AQP1 COL1A1 COL1A2 BCL2L11 SDC1 ALPL ID3 ITGA6	0	0	DN in EWS								0	0	DN in siEF	21536	diencephalon development	0.0084467	8	873	0.009	SOX2 CNTNAP2 SALL1 ARX RAX NR0B1 GLI1 POU3F2	0	0	UP in siEF&EEF	5856	cytoskeleton	0.00078301	186	1778	0.104	WIPF2 AVIL TNC AMOT TGM1 EPS8 KIF5C CFL2 KIF5A ADORA1 COTL1 HOMER3 KIFAP3 TMSB10 CAST MYLIP GABARAPL1 LMO4 ACTN1 TPM2 TMOD2 TPM1 KRT8 ADAM10 FRMD4A IFT80 ACTN4 ANK3 ANK1 MID1 MYL5 TANC1 CLIP2 ADAM17 EML6 MYL6 FRMD6 FRMD8 BIN1 PARD3 TTLL11 TLN2 AJUBA TRIB2 ARL8A STX1A VCL RAI14 TBCEL FBLIM1 FLII ARL3 ITPR1 TWF2 LIN7A CACNA1C PLA2G6 CORO1A NDRG1 MYL12A CNN2 DYNC2LI1 SLC9A3R1 KLC4 KIF3B EPB41L1 CALD…	0	0
UP in EWS	42102	positive regulation of T cell proliferation	0.0078621	6	437	0.013	VCAM1 IL1B EBI3 PDCD1LG2 CD24 TNFSF13B	0	0	UP in siEF	32535	regulation of cellular component size	0.0023044	41	1392	0.029	NRP1 NDRG4 BTG1 AVIL SEMA3A FHL1 PDGFB SEMA3F TRIOBP CXCL16 TRO DNAJB2 GNG4 TMSB4X SPP1 NCK2 PLXNA3 APC2 TGFB2 GSN SMAD3 TNFRSF12A LAMB2 SPHK1 OSGIN1 SHROOM2 ISLR2 EMP1 NGF DCLK1 TGFBR1 DCBLD2 GREM1 TGFBR3 DAB2 RRAGC ULK1 NUPR1 IL7R CRYAB HBEGF	0	0	DN in EWS								0	0	DN in siEF	9892	negative regulation of metabolic process	0.0084467	65	873	0.074	RB1 SUV39H1 RAX BUB1B BRCA1 TTF2 HMGB1 BRCA2 CDC20 SOX2 SALL1 PSMD3 MLX EPC1 ENPP1 FBXO5 TP63 PRMT6 FOXD3 HELLS TIPIN RBM15 USP2 UBE2E1 PAX5 SMC1A RBL1 PAX9 TIMELESS ZMYND11 ANAPC1 BLM PSMD12 DNMT1 PHB ATP1A1 PURB CCNB1 CDC45 CUX2 INPP5D NACC1 E2F1 IGF2BP1 PAIP2 TAF9B FZD1 SUZ12 CDT1 ZBTB16 CAV1 EAF2 NR0B1 PA2G4 FANCB VAX1 POU4F2 MTOR CENPF LIN28B WT1 ID2 AGO2 HOXD8 MAD2L1	0	0	UP in siEF&EEF	42060	wound healing	0.00083324	39	1778	0.021	NOTCH3 B4GALT1 SDC2 PROS1 STXBP1 PDGFA PLAT TFPI ENO3 ERBB2 HMOX1 CD59 TGFB2 MAP3K1 GSN SMAD3 IFNGR1 ITGA2 FZD7 MST1 TPM1 TFPI2 F2R PLAUR RAB27A F3 SYT7 DCBLD2 ADAM17 KLF6 LOX COL5A1 GNAQ NINJ1 SDC1 CD9 ITGA5 PPARA AJUBA	0	0
UP in EWS	46983	protein dimerization activity	0.0079158	28	437	0.064	CEBPD EPAS1 CEBPG PDGFB PDGFA OLFML2A BACH2 SDCBP NFIL3 IRAK2 HMOX1 CCN1 BOK PDGFRA JUN TGFB2 AADAT ITGA1 FOS FOSL2 NR4A2 DDIT3 FOSB CDH13 ATF3 ABCG1 TLR2 CREB5	0	0	UP in siEF	65009	regulation of molecular function	0.0023044	117	1392	0.084	ERRFI1 CSF1 CD81 DGKA SERPINE1 TNC HR ICAM1 RGS4 EDNRA RGS3 PLAU PALM ADORA1 PIM1 LEPR CCN2 MAP3K6 RGS9 TGM2 CARD10 TPM2 PRKCD TPM1 F2R MAPK8IP1 EREG SIGIRR PRKAR1B DDIT3 NEIL1 AJUBA TRIB2 SCG2 SDC4 FICD PDGFB BCL10 HRH1 APH1B IRAK2 CALD1 PSAP HMOX1 ABL2 CYTL1 APOE TBC1D17 JUN TGFB2 SMAD3 JUP GADD45B HSPA5 GADD45A EIF2AK3 ADAP1 SMAD7 EFNA1 NR4A2 CYLD RCAN1 TNFSF4 BCL3 JMY ID3 TPP1 CD24 FLT1 LTB4R…	0	0	DN in EWS								0	0	DN in siEF	9314	response to radiation	0.0086958	23	873	0.026	BLM TIPIN FEN1 PRKDC PDE1B XRCC2 CAV1 SLC1A3 BRCA1 FANCB BRCA2 SMC1A FANCG TICRR RP1 GNGT2 CCND1 NETO1 FANCD2 POLD1 USP1 RAD54L DTL	0	0	UP in siEF&EEF	60348	bone development	0.00083392	29	1778	0.016	ACHE RARG FOXC1 SPARC COL13A1 TUFT1 SATB2 PTGS2 FSTL3 GLI2 CTSO SOX8 OSTF1 SOX9 MEF2D JUNB PDLIM7 WWTR1 SMAD3 MMP2 EIF2AK3 KAZALD1 COL1A1 EXT2 MMP14 COL2A1 BMP1 COL5A2 HOXB4	0	0
UP in EWS	2688	regulation of leukocyte chemotaxis	0.0079753	5	437	0.011	GREM1 SERPINE1 VEGFC F2RL1 THBS1	0	0	UP in siEF	30516	regulation of axon extension	0.0023071	9	1392	0.006	APC2 NRP1 TNFRSF12A SEMA3A ISLR2 APOE SEMA3F NGF PLXNA3	0	0	DN in EWS								0	0	DN in siEF	778	condensed nuclear chromosome kinetochore	0.0087056	3	873	0.003	CCNB1 PLK1 CENPA	0	0	UP in siEF&EEF	33036	macromolecule localization	0.00084415	152	1778	0.085	RAB3B SLC27A1 TRAF3IP2 GOLT1B CD81 CBLB CLU SCAMP5 PALM AP1S2 HOMER3 CCN1 KIFAP3 TMSB10 F2R TAP1 ATP11A ACTN4 ANK3 MAPK8IP3 PDIA4 RAB32 CACNB1 TOM1L2 RAB30 RAB31 RAB36 PARD3 TXNIP KDELR2 ULK1 TLN2 KDELR3 SQSTM1 OPTN STX1A VCL ABCG1 CFD RAB5B STXBP1 AGAP2 LIN7A LTBP3 HSP90B1 SYNGR1 CHST11 SCFD2 MYO6 PSAP S100A13 SNX9 APOE SNX7 SLC15A4 SEC31B RAB11FIP4 RAB11FIP5 BBS2 ABCA1 CTSA JUN TGFB2 OSBPL5 ATP…	0	0
UP in EWS	51347	positive regulation of transferase activity	0.0084529	16	437	0.036	CARD10 TGFB2 FLT1 SDC4 GADD45B DUSP1 ITGA1 PDGFB VLDLR THBS1 IL1B TPP1 S1PR2 CD24 DRD4 TLR3	0	0	UP in siEF	7566	embryo implantation	0.0023071	9	1392	0.006	TRO PLAU IL11RA KLF9 SPP1 LIF IGFBP7 PTGS2 TGFBR1	0	0	DN in EWS								0	0	DN in siEF	51382	kinetochore assembly	0.0087056	3	873	0.003	CENPE CENPF CENPA	0	0	UP in siEF&EEF	6897	endocytosis	0.00089176	42	1778	0.023	COLEC12 LMBR1L LRP1 SH3KBP1 DENND1A STXBP1 VLDLR CORO1A ASGR1 CXCL16 MRC2 CYTH2 MYO6 ADORA1 AP1S2 MICALL2 SH3BP4 ITGAV APOE LDLR PDLIM7 TGM2 ABCA1 ANXA3 NR1H3 MERTK SORL1 IGF2R LRP1B DNM1 GULP1 EHD1 DNM3 EHD2 BIN1 RIN3 PTX3 ULK1 MFGE8 LRP10 RIN2 LRP12	0	0
UP in EWS	9897	external side of plasma membrane	0.0084529	11	437	0.025	CD274 VCAM1 SERPINE2 ITGA1 CDH13 PDCD1 THBS1 ABCG1 ICAM1 TLR2 AMOT	0	0	UP in siEF	48732	gland development	0.0023593	31	1392	0.022	NRP1 PCSK1 LAMA5 NOTCH3 FOXC1 OXTR CSF1 SEMA3C SEMA3A PDGFB TNC SIX1 AHR BCL2L11 ATP7B MDK ERBB2 SOX9 WNT3 NKX3-1 TGM2 TBX1 TGFB2 SMAD3 EYA1 EIF2AK3 TGFBR1 DKK3 BCAM HOXB9 CD44	0	0	DN in EWS								0	0	DN in siEF	31262	Ndc80 complex	0.0087056	3	873	0.003	NUF2 SPC24 SPC25	0	0	UP in siEF&EEF	10324	membrane invagination	0.00089176	42	1778	0.023	COLEC12 LMBR1L LRP1 SH3KBP1 DENND1A STXBP1 VLDLR CORO1A ASGR1 CXCL16 MRC2 CYTH2 MYO6 ADORA1 AP1S2 MICALL2 SH3BP4 ITGAV APOE LDLR PDLIM7 TGM2 ABCA1 ANXA3 NR1H3 MERTK SORL1 IGF2R LRP1B DNM1 GULP1 EHD1 DNM3 EHD2 BIN1 RIN3 PTX3 ULK1 MFGE8 LRP10 RIN2 LRP12	0	0
UP in EWS	2696	positive regulation of leukocyte activation	0.0085126	10	437	0.022	VCAM1 IL1B EBI3 BCL10 PDCD1LG2 CD24 TAC1 THBS1 IL13RA1 TNFSF13B	0	0	UP in siEF	51704	multi-organism process	0.0023593	91	1392	0.065	PCSK1 OXTR FLT1 COL16A1 CD81 SERPINE1 ADM F11R GRPR LYST ICAM1 IL27RA AQP1 IFIH1 TRO PLAU KDR LEPR ITGAV IL6R TEAD3 CXADR RSAD2 IL11RA ANXA3 GPX3 SPHK1 PLA2G4C IGFBP2 F2R HLA-B KRT8 HLA-C HLA-A NGF F3 PGF TGFBR1 ACTA2 DNAJC3 VGF NPC2 IRF7 MFGE8 SCG2 EPHA3 PTGFR SP100 NLRX1 SLC22A5 UNC93B1 FBLN1 BCL10 PLD1 PTGS2 SAMHD1 SOCS3 SOCS1 IRAK2 SPP1 CCL2 TNFRSF14 FYN IGFBP7 APOL1 TAC1 RAB11FIP4 JUN SMAD3 …	0	0	DN in EWS								0	0	DN in siEF	1764	neuron migration	0.0091124	10	873	0.011	BARHL2 DAB1 SOX1 DCC ARX DCDC2 CCK VAX1 NTN1 FEZF1	0	0	UP in siEF&EEF	51094	positive regulation of developmental process	0.00090568	59	1778	0.033	ROBO2 NRP1 OXTR BTG1 BMPR2 B4GALT1 CSF1 SERPINE2 TGFB1I1 TRADD SIX1 CLU AMOT GLI2 BOC SH3PXD2B NEFL NRCAM IL6R JUNB APC2 ACVR1 IL4R WNT5B TNFRSF12A METRN ANXA3 SPHK1 SERPINF1 CTNNBIP1 FNDC3B VASH2 PRKCA F3 RHOB TGFBR2 NUMBL TSHZ3 PTGS2 FOXO3 RTN4 HSF4 PDLIM7 CD276 TFAP2A WWTR1 JUN TGFB2 SMAD3 BAD LIF VEGFC VEGFA KITLG BMP1 PLXNB2 PLXNB1 SPRY1 FGFR1	0	0
UP in EWS	10243	response to organic nitrogen	0.0085181	8	437	0.018	NR4A2 DDIT3 IL1B MMP3 CCN2 PTGS2 CCN1 DRD4	0	0	UP in siEF	10035	response to inorganic substance	0.0024321	36	1392	0.025	PCSK1 SERPINE1 TNC PDGFA LCAT PTGS2 THBS1 NDRG1 AQP1 ATP7B S100A16 HMOX1 KCNMB4 APOE A2M PDGFRA PRNP JUN GSN GPX3 SPHK1 TPM1 IGFBP2 CYBRD1 F3 KLF2 ASS1 FOSL1 COL1A1 NR4A2 DDIT3 MGP TXNIP SDC1 ERCC6 CRYAB	0	0	DN in EWS								0	0	DN in siEF	42981	regulation of apoptosis	0.009205	64	873	0.073	TOP2A PECR RYR2 CSRNP3 RAX IRS2 BRCA1 HMGB1 BRCA2 PIK3CG ARHGAP4 SOX2 PREX1 SMPD1 CHEK2 TP63 HELLS EPHA7 ACTN2 DAPK1 DCC ARHGEF16 PLA2G4A MMP9 VAV1 TIAM1 ARC PAX7 G2E3 PPIF BIRC5 DTL CARD11 ITGB3BP PRKDC PHB KALRN HSPD1 PROKR1 FGD4 TERT INPP5D NACC1 NLRP2 ALX4 ECT2 TAF9B MAP2K6 HSPA9 NGFR WWOX GABBR1 BCL11B ZBTB16 XRCC2 MCF2 CARD6 CCK IGF1 FANCB POU4F1 WT1 CYCS TP73	0	0	UP in siEF&EEF	10975	regulation of neuron projection development	0.00091889	25	1778	0.014	RTN4R ROBO2 NRP1 NUMBL BRI3 SEMA3A SEMA3F RTN4 PTPRG CDH2 NCS1 NEFL NEFM NRCAM APOE PLXNA3 APC2 TNFRSF12A METRN SPHK1 EFNA1 TEP1 PLXNB2 PLXNB1 ULK1	0	0
UP in EWS	50818	regulation of coagulation	0.0085181	6	437	0.013	SERPINE2 SERPINE1 PDGFB PDGFA F2RL1 THBS1	0	0	UP in siEF	15629	actin cytoskeleton	0.0024847	40	1392	0.028	MYOM1 AVIL TNC FHL2 LPL TRIOBP CNN2 PDLIM2 CALD1 MYO6 MICALL2 BMF FILIP1L SYNPO CGNL1 PDLIM7 SVIL GSN JUP ACTN1 TPM2 TPM1 SHROOM2 DSTN CORO2B AIF1L ACTA2 MYO1E MYO1B MYL6 MARCKS PALLD STK17B CDC42EP3 ZYX CDC42EP1 CRYAB MYL9 RHOQ GAS7	0	0	DN in EWS								0	0	DN in siEF	1824	blastocyst development	0.0098837	8	873	0.009	GINS1 FOXD3 NASP G2E3 MFN2 FANCB BRCA2 NLE1	0	0	UP in siEF&EEF	42476	odontogenesis	0.00093849	18	1778	0.01	DLX1 LAMA5 DLX2 FOXC1 TGFB2 CSF1 TUFT1 LAMB1 GLI2 COL1A1 BCL2L11 BSG SDC1 ALPL ID3 ITGA6 MSX1 NF2	0	0
UP in EWS	1868	regulation of complement activation, lectin pathway	0.0085181	2	437	0.004	SERPING1 A2M	0	0	UP in siEF	31983	vesicle lumen	0.0024898	11	1392	0.007	CFD TGFB2 SPARC PDGFB FN1 PDGFA VEGFC SERPING1 A2M THBS1 THBS3	0	0	DN in EWS								0	0	DN in siEF	5875	microtubule associated complex	0.010338	13	873	0.014	DNAH10 HAUS4 DNHD1 KIF23 HAUS6 KIF11 AURKB KIF15 KLC2 KIFC1 BIRC5 KIF2C DYNC1I1	0	0	UP in siEF&EEF	10558	negative regulation of macromolecule biosynthetic process	0.00099847	90	1778	0.05	CDKN1C KDM5B PTPRU RARG LDB1 CBY1 GLI2 ING4 HEY1 TRPS1 CIR1 ITGAV SOX8 SOX9 JARID2 SOX6 IL6R LMCD1 TSPYL2 KLF11 MEF2C ZHX3 TLE1 IGFBP5 CTNNBIP1 ARID5A RFX3 ARID5B PRKCA COMMD7 GEM SIGIRR ZEB1 ADORA2B RBP1 IRF2 IRF7 HOXB4 TXNIP PPARA TRIB2 JDP2 HBEGF DLX1 DLX2 LRP1 SATB2 TWIST1 PBXIP1 TXN PPOX FOXO3 GLIS2 ATXN1 DNAJB5 NACC2 NRIP1 HSF4 IGF2BP2 MSX1 ZNF423 S100A11 CD276 TCF7L2 WWTR1 TCF7L1 SMAD3 PRR…	0	0
UP in EWS	1869	negative regulation of complement activation, lectin pathway	0.0085181	2	437	0.004	SERPING1 A2M	0	0	UP in siEF	50927	positive regulation of positive chemotaxis	0.0025379	8	1392	0.005	SMAD3 CXCL8 KDR VEGFC F2RL1 CDH13 F3 SCG2	0	0	DN in EWS								0	0	DN in siEF	34470	ncRNA processing	0.010376	21	873	0.024	NOP56 POP1 DIMT1 SUV39H1 HEATR1 WDR4 DDX21 PA2G4 ADAT3 ALKBH8 NOL6 EMG1 LIN28B DKC1 EXOSC9 AGO2 GEMIN4 NAF1 UTP20 DUS1L TRDMT1	0	0	UP in siEF&EEF	43565	sequence-specific DNA binding	0.0010131	95	1778	0.053	RARG CALCOCO1 SIX1 RORA AHR NR3C1 BACH2 GLI2 SIX4 CREB3L4 TRPS1 CREB3L1 GATAD1 CREB3L2 PIM1 SOX8 SOX9 SOX6 JUNB NKX3-2 NKX3-1 TSPYL2 CERS4 MEF2C BATF3 CERS6 ZHX3 SOX13 RFX3 CREB3 ZEB1 HOXB9 DDIT3 IRF1 HOXB4 HOXB3 ROR1 HOXB2 ROR2 PPARA HOXB8 HOXB7 ATF3 HOXB6 JDP2 HOXB5 HOMEZ DLX1 DLX2 FOXC1 CEBPD TSHZ3 EPAS1 SATB2 TSHZ1 SHOX2 TSHZ2 CREBL2 FOXO4 FOXO3 FOXO1 HSF4 MSX1 HOXC9 MEF2D TBX1 TCF7L2 JUN XBP…	0	0
UP in EWS	51365	cellular response to potassium ion starvation	0.0085181	2	437	0.004	HRK JUN	0	0	UP in siEF	31091	platelet alpha granule	0.002558	13	1392	0.009	CFD TGFB2 SPARC SERPINE2 PDGFB FN1 PDGFA VEGFC THBS1 THBS3 CD9 SERPING1 A2M	0	0	DN in EWS								0	0	DN in siEF	910	cytokinesis	0.01051	9	873	0.01	ANLN AHCTF1 RACGAP1 ESPL1 INCENP BIRC5 FANCB BRCA2 AURKB	0	0	UP in siEF&EEF	3700	transcription factor activity	0.0010579	133	1778	0.074	RORA AHR NR3C1 BACH2 DACH1 CREB3L4 CREB3L1 CREB3L2 CIR1 SOX8 SOX9 SOX6 JUNB SOX4 ZNF287 MEF2C LMO4 SOX13 RFX3 HIC1 HOXB9 DDIT3 RBP1 HOXB4 HOXB3 ROR1 HOXB2 ROR2 HOXB8 HOXB7 ATF3 HOXB6 HOXB5 HOMEZ DLX1 DLX2 TSHZ3 EPAS1 TSHZ1 SHOX2 TSHZ2 CREBL2 FOXO4 FOXO3 NPAS2 FOXO1 ZFP36L2 ZFP36L1 ZNF423 HOXC9 TFAP2A JUN XBP1 ZFHX2 SMAD3 PBX3 NFATC1 PBX4 POU2F2 MAFA PBX1 NFATC4 FOSL2 NFKB2 DRAP1 FOSL1 NR4A2 RCAN1…	0	0
UP in EWS	10511	regulation of phosphatidylinositol biosynthetic process	0.0085181	2	437	0.004	PDGFB PDGFA	0	0	UP in siEF	32103	positive regulation of response to external stimulus	0.0026544	18	1392	0.012	SMAD3 CXCL8 SERPINE1 PDGFB VEGFC PTGS2 THBS1 F3 EDNRA ADORA2B KDR F2RL1 CDH13 CCL2 TAC1 IL6R SCG2 TGM2	0	0	DN in EWS								0	0	DN in siEF	10604	positive regulation of macromolecule metabolic process	0.010654	69	873	0.079	RB1 BARHL2 CSRNP3 POP1 IRS2 BRCA1 TTF2 HMGB1 IKZF2 GLI1 CDC20 SOX2 CCND3 SALL1 CCND1 PSMD3 EPC1 FBXO5 TP63 FOXD3 POU1F1 RBM15 SYK UBE2E1 POU3F1 POU3F2 KLF15 UHMK1 PAX9 DNA2 DTL ANAPC1 CARD11 KMT2D BLM PSMD12 DNMT1 HLF PRKDC HOXD13 PSMC3IP CCNB1 E2F1 ALX4 E2F3 PPARGC1B NKX2-2 ESRRA EGR2 BCL11B CAV1 NFYC PLK1 NFATC3 CCK IGF1 GDF6 POU4F2 MTOR RAD50 TEC NR4A3 WT1 UBE2S UBE2N REL NAA15 HOXD3 TP73	0	0	UP in siEF&EEF	31301	integral to organelle membrane	0.0011755	28	1778	0.015	RTN2 RTN1 SLC35D1 INSIG2 PEX11B SGMS2 RFNG RTN4 SGPL1 SLC22A17 ST3GAL4 ST3GAL5 ST3GAL6 QSOX1 ST3GAL1 ABCD1 FIS1 HSPA5 WFS1 BNIP3 AMFR TAP1 ERN1 DPM3 ASPH ASPHD1 ASPHD2 ST6GALNAC4	0	0
UP in EWS	10512	negative regulation of phosphatidylinositol biosynthetic process	0.0085181	2	437	0.004	PDGFB PDGFA	0	0	UP in siEF	43392	negative regulation of DNA binding	0.0026544	15	1392	0.01	TCF7L2 JUN SP100 HR COMMD7 SMAD7 SIGIRR CYLD IRAK2 DDIT3 TNFSF4 PIM1 HMOX1 ID3 SCG2	0	0	DN in EWS								0	0	DN in siEF	51438	regulation of ubiquitin-protein ligase activity	0.010654	12	873	0.013	CDC20 PSMD12 CCNB1 UBE2S PSMD3 PLK1 UBE2E1 UBE2N BUB1B FBXO5 ANAPC1 MAD2L1	0	0	UP in siEF&EEF	7050	cell cycle arrest	0.0012516	25	1778	0.014	CDKN1C PPP1R15A CXCL8 FOXO4 PKD2 PKD1 ING4 SESN3 SESN1 TP53INP1 CDKN2D TCF7L2 PRNP TGFB2 SMAD3 DST GADD45A VASH1 MLF1 MAPK12 ERN1 DDIT3 JMY HBP1 GAS7	0	0
UP in EWS	47749	cholestanetriol 26-monooxygenase activity	0.0085181	2	437	0.004	CYP27A1 CYP2R1	0	0	UP in siEF	9790	embryonic development	0.0026679	73	1392	0.052	PCSK1 LDB1 TGFB1I1 SIX1 ECE1 ADM CELSR1 SOBP EDNRA SOX8 CCN1 NKX3-2 NKX3-1 CDON PDGFRB PDGFRA CUBN ITGA4 LMO4 LMO2 DKK1 TGFBR1 RGMA TGFBR2 GREM1 UGDH BTD ZEB1 COL2A1 HOXB9 DDIT3 ROR2 HOXB8 SCG2 FOXC2 LAMA5 NOTCH3 DLX2 FOXC1 CRABP2 SEMA3C TSHZ3 EPAS1 TSHZ1 PDGFA BCL10 SOCS3 BCL2L11 CHST11 RDH10 MYO6 WNT3 TBX1 TCF7L2 TCF7L1 TGFB2 SMAD3 EYA1 PRRX1 FZD6 LIF VEGFC KLF4 EFNA1 COL1A1 MYO1E BST1 DAB2 MAF…	0	0	DN in EWS								0	0	DN in siEF	50793	regulation of developmental process	0.010819	60	873	0.068	RB1 BARHL2 CD83 POP1 ITGB2 BRCA2 GLI1 CDC20 SOX2 PNP CCND1 C3AR1 ENPP1 TP63 RBM15 SYK DCC PLA2G4A ADRA2C POU3F2 WDR77 ASPM TIAM1 FKBP4 CARD11 DLX5 HOXD13 THY1 NTN1 KALRN PURB FGD4 C5 CCNB1 INPP5D LRRC4C MBNL3 NKX6-1 NKX2-2 FZD1 ESRRA SUZ12 NGFR GDF11 EGR2 ABCA5 EGF ZBTB16 XRCC2 CAV1 NR0B1 CCK IGF1 FANCB VAX1 POU4F2 CENPE CENPF ID2 HOXD3	0	0	UP in siEF&EEF	5795	Golgi stack	0.0013216	24	1778	0.013	B4GALT1 CHPF CHPF2 GALNT1 FUT11 GOLIM4 FURIN PLD1 SULF1 ZFYVE1 CLIP3 GOLGA2 GOLGA8B RAB30 FUT8 PITPNM1 CHSY1 NCS1 LPCAT2 ST3GAL4 ST3GAL1 NUCB2 B4GALT4 B4GALNT4	0	0
UP in EWS	43292	contractile fiber	0.0087886	10	437	0.022	MYOM1 JPH2 SYNM SDC4 TNNT1 ANKRD1 DMD NEB CACNA1C CCN1	0	0	UP in siEF	9890	negative regulation of biosynthetic process	0.0027197	75	1392	0.053	KDM5B PTPRU SLC27A1 LDB1 PTPRO CBY1 HR ING4 EDNRA HEY1 TRPS1 PALM ITGAV SOX8 SOX9 IL6R LMCD1 KLF11 MEF2C IGFBP5 ARID5A ARID5B COMMD7 GEM RUNX2 EREG DKK3 SIGIRR ZEB1 ADORA2B RBP1 IRF7 TXNIP PPARA TRIB2 SCG2 JDP2 HBEGF DLX2 SP100 LRP1 PDGFB GLIS3 PDGFA PBXIP1 FOXO3 GLIS1 GLIS2 ATXN1 DNAJB5 HSF4 IGF2BP2 ZNF423 S100A11 TCF7L2 TCF7L1 MPP4 SMAD3 PRRX1 EIF2AK3 KLF4 SORBS3 MAPK15 SMAD7 DRAP1 AGO4 TNFSF4 …	0	0	DN in EWS								0	0	DN in siEF	4935	adrenoceptor activity	0.011013	4	873	0.004	ADRB3 ADRA1D ADRB1 ADRA2C	0	0	UP in siEF&EEF	43412	macromolecule modification	0.0014301	207	1778	0.116	TRIO UBE2L6 ADARB1 ZDHHC1 RPS6KA5 RPS6KA2 CCN1 PDK2 PDK1 ACVR1 EPHA4 PRKCD DAPK3 PRKCA MAPK8IP3 MAPK8IP1 PRKAR1B ASPHD1 KCTD10 TEP1 HECW2 ULK2 ASPHD2 ULK1 TTLL11 EPHA3 EPHA2 MTMR3 FUT11 UBE2J1 NUAK1 NUAK2 RNF217 DPH3 ST3GAL4 ST3GAL5 ST3GAL6 ST3GAL1 ABCA1 CDK17 PLK3 CDK18 CDK19 APOBEC3F DMPK GADD45B PLK2 FN1 EIF2AK3 DCLK2 DCLK1 CYLD MEX3B RNF103 NCEH1 PTK7 FBXL2 PPT2 DDR1 PTPRU BTG1 PTPRJ PIGV TRI…	0	0
UP in EWS	19900	kinase binding	0.0087886	14	437	0.032	ERRFI1 NRP1 DUSP2 BTG1 SDC4 DUSP1 BCL10 FOXO3 HDAC9 SOCS1 CAMK2N1 TRIB3 TRIB1 CD24	0	0	UP in siEF	30030	cell projection organization	0.0027406	49	1392	0.035	NRP1 SPON2 ITGB4 CBY1 ADM CELSR3 ALCAM KIF5C TUBB3 NCK2 EPHA4 UNC5B TPM1 UNC5C NGF DNM3 VCAN RTN4RL1 S100A6 CDH13 ULK2 ITGA6 ULK1 AJUBA CD44 GAS7 RTN4R LAMA5 SDC2 SEMA3A SEMA3B PDGFB PDGFA EFNA5 MAP2 MYO6 NPHP1 ERBB2 DMD APOE PLXNA3 LAMB2 L1CAM DCLK1 NR4A2 KLF7 KLF5 TTLL3 FXYD5	0	0	DN in EWS								0	0	DN in siEF	30182	neuron differentiation	0.011256	38	873	0.043	RET DGKG CNTNAP2 BARHL2 DLX5 ARX SLC1A3 THY1 BHLHE22 HMGB1 NTN1 KALRN SOX2 PARD6B SOX1 OTX2 NCAM2 NKX6-1 FEZF1 NKX2-2 FZD1 NGFR EPHA7 EGR2 UNC5A BCL11B FZD4 DCC CCK VAX1 POU3F2 POU4F1 POU4F2 UHMK1 OLFM3 PAX7 STRN TP73	0	0	UP in siEF&EEF	43235	receptor complex	0.001455	25	1778	0.014	ITGB1 ITGB5 CSF1 ITGB4 TRADD EPS8 ERBB2 ITGAV IL6R IL13RA1 ACVR1 CHRNB1 SMAD3 ITGA4 ITGA3 ITGA2 ITGA1 GRIN2C TGFBR1 GRIN2D TGFBR2 ITGA10 ITGA7 ITGA6 ITGA5	0	0
UP in EWS	42493	response to drug	0.0087886	16	437	0.036	JUN PDGFB PDGFA VEGFC FOS PTGS2 NGF THBS1 SOCS1 DDIT3 IL1B CYP1A1 CASP1 TXNIP PLIN2 TLR2	0	0	UP in siEF	9892	negative regulation of metabolic process	0.0029244	98	1392	0.07	ERRFI1 SLC27A1 SERPINE2 SERPINE1 PLAT HR EDNRA PALM ADORA1 SOX8 SOX9 IL6R MEF2C IGFBP5 IGFBP3 PRKCD ARID5A ARID5B GEM RUNX2 EREG DKK3 SIGIRR RBP1 TXNIP SERPING1 TRIB2 SCG2 DLX2 PDGFB GLIS3 PDGFA FOXO3 GLIS1 GLIS2 SOCS1 ATXN1 APOE ZNF423 A2M S100A11 JUN SMAD3 EIF2AK3 GRIN2C SMAD7 DRAP1 AGO4 TNFSF4 GIPC1 BHLHE40 BCL3 SNAI2 ID3 TPP1 RCOR2 MXD4 HRK KDM5B PTPRU LDB1 PTPRO CBY1 ING4 HEY1 TRPS1 ITGAV LM…	0	0	DN in EWS								0	0	DN in siEF	43067	regulation of programmed cell death	0.011304	64	873	0.073	TOP2A PECR RYR2 CSRNP3 RAX IRS2 BRCA1 HMGB1 BRCA2 PIK3CG ARHGAP4 SOX2 PREX1 SMPD1 CHEK2 TP63 HELLS EPHA7 ACTN2 DAPK1 DCC ARHGEF16 PLA2G4A MMP9 VAV1 TIAM1 ARC PAX7 G2E3 PPIF BIRC5 DTL CARD11 ITGB3BP PRKDC PHB KALRN HSPD1 PROKR1 FGD4 TERT INPP5D NACC1 NLRP2 ALX4 ECT2 TAF9B MAP2K6 HSPA9 NGFR WWOX GABBR1 BCL11B ZBTB16 XRCC2 MCF2 CARD6 CCK IGF1 FANCB POU4F1 WT1 CYCS TP73	0	0	UP in siEF&EEF	44456	synapse part	0.0014575	48	1778	0.026	OPRD1 TAMALIN PRR7 CLSTN3 DENND1A TPRG1L ITPR1 PIK3CD LIN7A CACNA1C PPOX SYNE1 EPS8 SCAMP5 SYNGR1 CAMK2N1 CALD1 NCS1 PSD3 ERBB2 ADORA1 HOMER3 DLGAP4 SNTA1 CAST CHRNB1 UNC13A HOMER2 IFNGR1 SPHK1 F2R ADAM10 L1CAM SYNGR3 GRIN2C REC8 SYT7 PJA2 GRIN2D FOSL1 DNM3 TANC1 SYT11 BIN1 GIPC1 ATP6V0D1 SHANK3 STX1A	0	0
UP in EWS	51384	response to glucocorticoid stimulus	0.0089094	9	437	0.02	ANXA3 DUSP1 IL1B SERPINE1 ADM FOS PTGS2 NGF A2M	0	0	UP in siEF	5021	vascular endothelial growth factor receptor activity	0.0029329	5	1392	0.003	PDGFRB NRP1 PDGFRA FLT1 KDR	0	0	DN in EWS								0	0	DN in siEF	34660	ncRNA metabolic process	0.011336	24	873	0.027	NOP56 POP1 DIMT1 SUV39H1 HEATR1 WDR4 DARS2 DDX21 PA2G4 ADAT3 ALKBH8 NOL6 EMG1 LIN28B SARS2 DKC1 EXOSC9 GEMIN4 NAF1 UTP20 DUS1L TRDMT1 EARS2 VARS1	0	0	UP in siEF&EEF	1503	ossification	0.0015719	26	1778	0.014	ACHE FOXC1 SPARC COL13A1 TUFT1 SATB2 PTGS2 FSTL3 GLI2 CTSO SOX8 OSTF1 MEF2D JUNB PDLIM7 WWTR1 SMAD3 MMP2 EIF2AK3 KAZALD1 COL1A1 EXT2 MMP14 COL2A1 BMP1 COL5A2	0	0
UP in EWS	6979	response to oxidative stress	0.0089739	13	437	0.029	JUN BTG1 DUSP1 EPAS1 SERPINE1 FOS PTGS2 KLF2 COL1A1 DDIT3 TXNIP HMOX1 STX3	0	0	UP in siEF	40013	negative regulation of locomotion	0.0029901	16	1392	0.011	PTPRU CD63 IGFBP5 IGFBP3 SEMA3A TPM1 PTPRO SERPINE1 PDGFB VASH1 THBS1 SMAD7 GREM1 ADORA1 HMOX1 APOE	0	0	DN in EWS								0	0	DN in siEF	45892	negative regulation of transcription, DNA-dependent	0.011494	35	873	0.04	RB1 DNMT1 SUV39H1 TTF2 HMGB1 SOX2 PURB SALL1 CUX2 E2F1 MLX EPC1 TAF9B TP63 PRMT6 SUZ12 FOXD3 HELLS RBM15 ZBTB16 CAV1 USP2 EAF2 NR0B1 PA2G4 PAX5 VAX1 POU4F2 RBL1 WT1 ID2 PAX9 TIMELESS ZMYND11 HOXD8	0	0	UP in siEF&EEF	51129	negative regulation of cellular component organization	0.0015924	35	1778	0.019	RTN4R ROBO2 NRP1 BRI3 AVIL SEMA3A CAPG SEMA3F CORO1A CLU TRIOBP RTN4 PTPRG CDC42 DNAJB2 CST3 SCAMP5 CAPZB TMEM67 TMSB4X JARID2 TMSB10 PLXNA3 MAP3K1 GSN NR1H3 MID1 SMAD7 MMP14 TEP1 DLC1 TERF2IP TPP1 ULK1 RHOQ	0	0
UP in EWS	5886	plasma membrane	0.0093701	120	437	0.274	LY6K ERRFI1 SERPINE2 CD82 SERPINE1 F11R CELSR3 ICAM1 AMOT EPS8 TGM1 SCN9A KDR CCN2 ANKS1B IL13RA1 EPHA4 PDGFRA SLC38A1 CXADR ISLR2 DKK1 MR1 TM4SF1 GEM OSCAR RAB31 FRMD6 RELL1 ABCG1 CD274 SDC4 EBI3 ITPR1 LY96 BCL10 CACNA1C NDRG1 SDCBP APH1B TSPAN9 SNTG1 HMOX1 SCN3B TAC1 SLC38A2 DRD4 SLC38A4 VCAM1 TNFRSF9 FZD6 CGN COL1A1 BST1 PPFIBP1 LYPD6B CD24 ULBP1 CPM NRP1 SYNM FLT1 PIK3CD VLDLR TNFSF13B JPH2 P…	0	0	UP in siEF	30182	neuron differentiation	0.0030061	57	1392	0.04	NRP1 SPON2 LDB1 RORA ADM CELSR3 ALCAM KIF5C TUBB3 EPHA4 WNT5B UNC5B UNC5C NGF TGFBR1 VCAN RTN4RL1 S100A6 ULK2 ULK1 ROR2 CD44 GAS7 RTN4R NOTCH3 DLX2 RTN1 BRI3 SDC2 SEMA3A NTM SEMA3B NTN4 EFNA5 MAP2 MYO6 PSAP ERBB2 DMD APOE WNT3 PLXNA3 MCOLN3 TGFB2 FZD2 FZD5 LAMB2 FZD7 LIF L1CAM DCLK1 EFNA1 NR4A2 KLF7 ID3 PTX3 MDGA1	0	0	DN in EWS								0	0	DN in siEF	792	heterochromatin	0.011858	9	873	0.01	SUZ12 HELLS DNMT1 SALL1 INCENP SUV39H1 TCP1 RAD54L MACROH2A2	0	0	UP in siEF&EEF	30029	actin filament-based process	0.0016146	45	1778	0.025	TNXB CORO1A RND3 TRIOBP HSP90B1 CNN3 AMOT CDC42 CNN2 EPS8 CYTH2 NUAK2 CAPZB EPB41L1 CALD1 TMSB4X MYO6 NPHP1 NCK2 FLNB TMSB10 PDLIM7 PDK1 GSN ARHGEF17 TPM1 SHROOM3 DSTN PARVA ACTN4 FHDC1 MYO1E EHD2 MYL6 FMNL2 DAAM1 DAAM2 DLC1 JMY MYH9 NF2 OBSL1 BCAR1 RHOQ GAS7	0	0
UP in EWS	7613	memory	0.0093701	6	437	0.013	IL1B CASP1 VLDLR PTGS2 NGF TAC1	0	0	UP in siEF	48640	negative regulation of developmental growth	0.0030278	6	1392	0.004	NRP1 SEMA3A SPP1 ULK1 SEMA3F PLXNA3	0	0	DN in EWS								0	0	DN in siEF	42254	ribosome biogenesis	0.012721	16	873	0.018	NOP56 DIMT1 SUV39H1 HEATR1 DDX21 PA2G4 NOL6 RCL1 EMG1 DKC1 EXOSC9 GEMIN4 TSR1 BRIX1 NAF1 UTP20	0	0	UP in siEF&EEF	5887	integral to plasma membrane	0.0016983	158	1778	0.088	SCARB2 OXTR CD81 CELSR1 IL27RA EPS8 GPR176 EDNRA LAMP1 SCN9A PALM ADORA1 LEPR NRCAM IL6R SLC16A3 SLC16A4 IL13RA1 ACVR1 CHRNB1 EPHA4 CXADR IL4R IL11RA F2R HLA-B HLA-C CNPY2 CYBA HLA-A ATP1B1 KCTD5 ADAM17 BCAM KCTD10 SCN8A KCTD11 ROR1 ROR2 KCTD17 KCTD15 EPHA3 ABCG1 EPHA2 NOTCH3 PTGFR CD151 SDC4 SDC2 SLC5A3 SYNGR1 SYNGR2 EFNB3 ANKH TSPAN9 PODXL TSPAN4 ST3GAL5 KCNMB4 ABCA1 FZD2 FZD5 FZD6 SLC33A1 GRIN…	0	0
UP in EWS	8138	protein tyrosine/serine/threonine phosphatase activity	0.0093701	6	437	0.013	DUSP4 DUSP5 DUSP2 DUSP1 DUSP8 PTPDC1	0	0	UP in siEF	51093	negative regulation of developmental process	0.0031399	41	1392	0.029	RTN4R NRP1 NOTCH3 DLX2 LDB1 TGFB1I1 SEMA3A LRRC17 SERPINE1 DTX1 SEMA3F THBS1 FSTL3 CST3 SPP1 CCL2 NPHP3 ITGAV SOX8 SOX9 PLXNA3 ABCA1 TCF7L2 CXADR IL4R SMAD3 LMO2 LIF VASH1 ASPN TGFBR1 EREG SMAD7 ZEB1 CDK6 COL4A2 ULK1 PPARA TRIB2 SCG2 ABCG1	0	0	DN in EWS								0	0	DN in siEF	7165	signal transduction	0.013	122	873	0.139	RB1 DGKG SH3GL3 CD83 POP1 RTKN2 BUB1B IRS2 IPO7 BAIAP2L2 CCND3 CCND1 CHEK2 ARHGDIB KNTC1 GTSE1 MAP3K4 TIPIN UNC5A DAPK1 PRKCB NPY1R HASPIN TIAM1 DEPDC1B PKP1 PRKD1 CARD11 BLM PDE1B HTRA3 PDE1A ARHGAP19 ADRB1 PIK3R1 PHB KALRN TRHDE RHOBTB2 CACNA1I C5 BRIP1 CCNB1 ARHGAP20 RACGAP1 GRK5 INPP5D G3BP2 CLSPN MAP2K6 TRAP1 CDT1 HTR1F CAV1 PLK1 IGF1 ZWINT ARHGAP33 DAB1 DLG2 PPP1R1A ARTN CDK4 DLG4 PLCH1 RAD…	0	0	UP in siEF&EEF	30176	integral to endoplasmic reticulum membrane	0.0017211	15	1778	0.008	RTN2 RTN1 SLC35D1 HSPA5 INSIG2 WFS1 AMFR TAP1 RTN4 ERN1 SGPL1 DPM3 ASPH ASPHD1 ASPHD2	0	0
UP in EWS	31099	regeneration	0.0097192	8	437	0.018	SOCS1 ANGPT2 ANXA3 SERPINE1 LIF ADM CCN1 INA	0	0	UP in siEF	44259	multicellular organismal macromolecule metabolic process	0.0031693	10	1392	0.007	COL1A1 MMP11 COL3A1 ADAMTS3 TNXB ADAM15 COL5A1 MMP2 TRAM2 MMP10	0	0	DN in EWS								0	0	DN in siEF	10948	negative regulation of cell cycle process	0.0133	8	873	0.009	RB1 CENPE CENPF GABBR1 ESPL1 BRCA1 SMC1A BUB1	0	0	UP in siEF&EEF	31327	negative regulation of cellular biosynthetic process	0.0017428	91	1778	0.051	CDKN1C KDM5B PTPRU SLC27A1 RARG LDB1 CBY1 GLI2 ING4 EDNRA HEY1 TRPS1 PALM CIR1 SOX8 SOX9 JARID2 SOX6 LMCD1 TSPYL2 KLF11 MEF2C ZHX3 TLE1 IGFBP5 CTNNBIP1 ARID5A RFX3 ARID5B PRKCA COMMD7 GEM SIGIRR ZEB1 RBP1 IRF2 IRF7 HOXB4 TXNIP PPARA TRIB2 JDP2 HBEGF DLX1 DLX2 LRP1 SATB2 PDGFA TWIST1 PBXIP1 TXN PPOX FOXO3 GLIS2 ATXN1 DNAJB5 NACC2 NRIP1 HSF4 IGF2BP2 MSX1 ZNF423 S100A11 CD276 TCF7L2 WWTR1 TCF7L1 SMA…	0	0
UP in EWS	50840	extracellular matrix binding	0.010226	5	437	0.011	COL11A1 OLFML2A CCN1 THBS1 DCN	0	0	UP in siEF	51173	positive regulation of nitrogen compound metabolic process	0.0032369	80	1392	0.057	CALCOCO1 MAML2 TGFB1I1 CITED4 FHL2 SIX1 RORA AHR ETS1 ICAM1 AKAP12 CREB3L2 SOX8 SOX9 CCN1 SOX4 IL11 PDGFRA MEF2C ANXA3 F2R EBF1 DYRK1B BHLHA15 TGFBR1 EREG ZEB1 HOXB9 ADORA2B DDIT3 IRF1 ROR2 PPARA SCG2 RHOQ FOXC2 NOTCH3 DLX2 FOXC1 SP100 EPAS1 PDGFB GLIS3 PDGFA BCL10 PTGS2 FOXO3 NPAS2 GLIS1 FOXO1 FSTL3 GLIS2 SEC14L2 HRH1 ATXN1 PDGFC MYO6 HSF4 CYTL1 APOE ZNF423 ABCA1 TFAP2B TCF7L2 JUN TCF7L1 MPP4 SM…	0	0	DN in EWS								0	0	DN in siEF	10941	regulation of cell death	0.013565	64	873	0.073	TOP2A PECR RYR2 CSRNP3 RAX IRS2 BRCA1 HMGB1 BRCA2 PIK3CG ARHGAP4 SOX2 PREX1 SMPD1 CHEK2 TP63 HELLS EPHA7 ACTN2 DAPK1 DCC ARHGEF16 PLA2G4A MMP9 VAV1 TIAM1 ARC PAX7 G2E3 PPIF BIRC5 DTL CARD11 ITGB3BP PRKDC PHB KALRN HSPD1 PROKR1 FGD4 TERT INPP5D NACC1 NLRP2 ALX4 ECT2 TAF9B MAP2K6 HSPA9 NGFR WWOX GABBR1 BCL11B ZBTB16 XRCC2 MCF2 CARD6 CCK IGF1 FANCB POU4F1 WT1 CYCS TP73	0	0	UP in siEF&EEF	48732	gland development	0.0019482	37	1778	0.02	NRP1 LAMA5 NOTCH3 RARG FOXC1 OXTR B4GALT1 CSF1 SEMA3C SEMA3A TNC SIX1 AHR GLI2 BCL2L11 ATP7B MDK ERBB2 PLXNA1 SOX9 WNT3 NKX3-1 TGM2 TBX1 TGFB2 SMAD3 EYA1 ITGA2 EIF2AK3 PBX1 TGFBR1 VEGFA BCAM HOXB9 TEP1 HOXB3 FGFR1	0	0
UP in EWS	45080	positive regulation of chemokine biosynthetic process	0.010226	3	437	0.006	IL1B HMOX1 TLR3	0	0	UP in siEF	2009	morphogenesis of an epithelium	0.0032541	32	1392	0.022	NRP1 FOXC2 LAMA5 NOTCH3 CSF1 SEMA3C TGFB1I1 SEMA3A CTSZ PDGFB TNC SIX1 ADM BCL10 CELSR1 SOCS3 EDNRA PODXL RDH10 SOX9 NKX3-1 TGM2 SMAD3 EYA1 LMO4 FZD6 VEGFC PGF RGMA TGFBR2 GREM1 CD44	0	0	DN in EWS								0	0	DN in siEF	48610	reproductive cellular process	0.013678	19	873	0.021	PRKDC ZBTB16 NR0B1 FANCC FANCB KNL1 BRCA2 FANCG MTOR SYT6 WDR77 VMO1 CCNB1 CCND1 WT1 CENPI HOOK1 FBXO5 TP63	0	0	UP in siEF&EEF	90092	regulation of transmembrane receptor protein serine/threonine kinase signaling pathway	0.0019731	22	1778	0.012	CDKN1C ACVR1 WWTR1 BMPR2 SMAD3 RBPMS SMURF2 HSPA5 TGFB1I1 HTRA1 LTBP4 FURIN PCSK6 TGFBR1 HIPK2 FSTL3 RGMA SMAD7 ADAM17 ZEB1 CHST11 GIPC1	0	0
UP in EWS	44057	regulation of system process	0.010635	18	437	0.041	OPRD1 TGFB2 FLT1 SDC4 EPAS1 ADM PTGS2 NGF VGF TNNT1 IL1B BHLHE40 HMOX1 CCN2 CCN1 TAC1 DRD4 HBEGF	0	0	UP in siEF	50926	regulation of positive chemotaxis	0.0035	8	1392	0.005	SMAD3 CXCL8 KDR VEGFC F2RL1 CDH13 F3 SCG2	0	0	DN in EWS								0	0	DN in siEF	50885	neuromuscular process controlling balance	0.013698	7	873	0.008	SOX2 TEC NR4A3 CDH23 SLC1A3 POU4F1 POU4F2	0	0	UP in siEF&EEF	302	response to reactive oxygen species	0.0020453	21	1778	0.011	JUN GPX3 SPHK1 TPM1 PRKCA F3 KLF2 FOSL1 COL1A1 PPP2CB PRDX5 GJA3 DDIT3 PXDN CAT TXNIP SDC1 HMOX1 APOE ERCC6 BCL2L1	0	0
UP in EWS	50900	leukocyte migration	0.010692	7	437	0.016	TGFB2 VCAM1 CXCL8 IL1B ITGA1 PDGFB ICAM1	0	0	UP in siEF	60324	face development	0.0036494	7	1392	0.005	COL1A1 PDGFRA SGPL1 ITGA4 ASPH MMP2 ARID5B	0	0	DN in EWS								0	0	DN in siEF	10165	response to X-ray	0.013758	5	873	0.005	BLM CCND1 XRCC2 FANCB BRCA2	0	0	UP in siEF&EEF	32963	collagen metabolic process	0.0020453	11	1778	0.006	COL1A1 MMP11 ADAMTS3 TNXB MMP16 ADAM15 COL5A1 MMP2 ID1 SERPINH1 TRAM2	0	0
UP in EWS	10646	regulation of cell communication	0.011217	46	437	0.105	ERRFI1 FLT1 RGS16 SERPINE1 PDGFB TNFAIP3 BCL10 PTGS2 THBS1 RGS4 SOCS1 FRZB IRAK2 TIMP2 CASP1 HMOX1 S1PR2 CCN1 TAC1 DRD4 NKX3-1 CARD10 DUSP2 PLEKHG1 TGFB2 ITGA1 LIF DUSP8 NGF DKK1 MID1 ASPN GREM1 VGF IL1B DDIT4 BHLHE40 ARHGEF3 RAPGEF2 CDH13 TRIB3 TRIB1 CD24 TLR3 HBEGF TLR2	0	0	UP in siEF	19897	extrinsic to plasma membrane	0.0036494	13	1392	0.009	APC2 ERRFI1 CUBN JUP SERPINE2 GNAI1 CYLD CDH2 GNG4 S100A6 APOE MFGE8 RGS9	0	0	DN in EWS								0	0	DN in siEF	5871	kinesin complex	0.013758	5	873	0.005	KLC2 KIF23 KIF2C KIF11 KIF15	0	0	UP in siEF&EEF	60538	skeletal muscle organ development	0.0020869	18	1778	0.01	SVIL IGSF8 IGFBP5 LMO4 F2R TNC SIX1 FGFRL1 RCAN1 MYL6 RCN1 SIX4 ERBB2 DMD AGRN CCN1 SNTA1 CTSB	0	0
UP in EWS	30593	neutrophil chemotaxis	0.011217	4	437	0.009	TGFB2 CXCL8 IL1B ITGA1	0	0	UP in siEF	32964	collagen biosynthetic process	0.0036494	4	1392	0.002	COL1A1 COL3A1 COL5A1 TRAM2	0	0	DN in EWS								0	0	DN in siEF	7052	mitotic spindle organization	0.013758	5	873	0.005	RCC1 KIF23 KIF11 SMC1A SPC25	0	0	UP in siEF&EEF	50927	positive regulation of positive chemotaxis	0.0021691	9	1778	0.005	CREB3 SMAD3 CXCL8 ITGA2 VEGFC F2RL1 PRKCA F3 VEGFA	0	0
UP in EWS	1541	ovarian follicle development	0.011549	6	437	0.013	LFNG IMMP2L VGF KDR MMP19 FOXO3	0	0	UP in siEF	1527	microfibril	0.0036494	4	1392	0.002	MFAP5 MFAP4 MFAP2 FBN1	0	0	DN in EWS								0	0	DN in siEF	51340	regulation of ligase activity	0.013977	12	873	0.013	CDC20 PSMD12 CCNB1 UBE2S PSMD3 PLK1 UBE2E1 UBE2N BUB1B FBXO5 ANAPC1 MAD2L1	0	0	UP in siEF&EEF	2062	chondrocyte differentiation	0.0021691	9	1778	0.005	COL2A1 WNT5B CHST11 COL11A2 CREB3L2 EIF2AK3 PRKCA MEF2D FGFR1	0	0
UP in EWS	14075	response to amine stimulus	0.011549	6	437	0.013	NR4A2 DDIT3 MMP3 CCN2 CCN1 DRD4	0	0	UP in siEF	48843	negative regulation of axon extension involved in axon guidance	0.0036494	4	1392	0.002	NRP1 SEMA3A SEMA3F PLXNA3	0	0	DN in EWS								0	0	DN in siEF	51640	organelle localization	0.014385	13	873	0.014	CDCA5 CENPA NTN1 CENPE ASPM CENPF CCNB1 KIF18A ESPL1 TACC3 MFN2 BIRC5 DLGAP5	0	0	UP in siEF&EEF	34260	negative regulation of GTPase activity	0.0022422	4	1778	0.002	FICD SPRY2 SPRY1 GMIP	0	0
UP in EWS	60	protein import into nucleus, translocation	0.011551	5	437	0.011	OPRD1 JUN TGFB2 BCL3 ARNTL	0	0	UP in siEF	1657	ureteric bud development	0.0036494	14	1392	0.01	FOXC2 LAMA5 FOXC1 SMAD3 SDC4 EYA1 TSHZ3 SIX1 PGF SMAD7 GREM1 SDC1 SPRY1 CD44	0	0	DN in EWS								0	0	DN in siEF	51960	regulation of nervous system development	0.014512	23	873	0.026	NGFR BARHL2 GDF11 EGF DCC XRCC2 THY1 IGF1 GLI1 ADRA2C VAX1 NTN1 KALRN POU3F2 CDC20 SOX2 ASPM TIAM1 HOXD3 LRRC4C FKBP4 NKX6-1 NKX2-2	0	0	UP in siEF&EEF	34261	negative regulation of Ras GTPase activity	0.0022422	4	1778	0.002	FICD SPRY2 SPRY1 GMIP	0	0
UP in EWS	45428	regulation of nitric oxide biosynthetic process	0.011551	5	437	0.011	IL1B PTX3 PTGS2 ICAM1 TLR2	0	0	UP in siEF	6955	immune response	0.0036802	74	1392	0.053	IFITM3 SPON2 IFITM2 CXCL8 FHL1 SECTM1 CBLB ETS1 LYST CXCL14 LTB4R IFI44L ICAM1 IL27RA CXCL16 IFIH1 DHX58 IL6R CMKLR1 IL4R RSAD2 ANXA3 PRKCD HLA-B HLA-C CYBA HLA-A PDCD1LG2 MR1 GEM SIGIRR TGFBR3 ZEB1 OAS1 SERPING1 CFD COLEC12 OPRD1 CD274 SEMA7A SP100 NLRX1 C1S SEMA3C C1R UNC93B1 EBI3 IFI6 LPL BCL10 SAMHD1 THBS1 S100A13 CCL2 TNFRSF14 APOL1 CD55 TNFSF18 IL32 APOBEC3F SMAD3 APOBEC3G CD70 LIF RAB27A P…	0	0	DN in EWS								0	0	DN in siEF	23046	signaling process	0.014512	137	873	0.156	RB1 DGKG SH3GL3 CD83 POP1 RTKN2 BUB1B IRS2 CLDN1 IPO7 BAIAP2L2 CCND3 CCND1 CHEK2 ARHGDIB KNTC1 GTSE1 MAP3K4 TIPIN KCNH5 UNC5A DAPK1 PRKCB NPY1R HASPIN POU3F1 POU3F2 CACNB2 TIAM1 DEPDC1B UTS2 PKP1 PRKD1 CARD11 BLM PDE1B HTRA3 PDE1A ARHGAP19 SLC1A3 ADRB1 PIK3R1 PHB KALRN TRHDE RHOBTB2 CACNA1I C5 BRIP1 CCNB1 ARHGAP20 RACGAP1 GRK5 INPP5D G3BP2 KCNN1 NAALAD2 CLSPN ASIC2 MAP2K6 TRAP1 CDT1 EGR2 SNAPIN H…	0	0	UP in siEF&EEF	43259	laminin-10 complex	0.0022422	4	1778	0.002	LAMA5 LAMB2 LAMB1 LAMC1	0	0
UP in EWS	32649	regulation of interferon-gamma production	0.011551	5	437	0.011	BCL3 CEBPG EBI3 IL20RB TLR3	0	0	UP in siEF	31224	intrinsic to membrane	0.0037212	481	1392	0.345	TMEM200A TRIL MRGPRF F11R GRPR EPS8 NYNRIN SCAMP5 GPR173 COMTD1 GPR176 ALCAM CREB3L1 CREB3L2 CMKLR1 TMEM8B IER3 CXADR UNC5B FNDC3B UNC5C SIGIRR CH25H BCAM CLDN4 ASPHD1 ORAI3 ORAI2 ASPHD2 RNF122 FICD SLC5A3 CHST11 RNF215 RDH10 ST3GAL5 KCNMB4 CHST14 ABCA1 CADM4 FZD2 FZD5 MCAM ABCA3 FZD7 ABCA4 FZD6 EIF2AK3 L1CAM GRIN2C TMEM198 RNF103 PCDHB2 LYPD6B TNFSF4 SFXN3 SSPN FAT3 FXYD6 FXYD5 TMEM51 LRRC3 PIGZ…	0	0	DN in EWS								0	0	DN in siEF	23060	signal transmission	0.014512	137	873	0.156	RB1 DGKG SH3GL3 CD83 POP1 RTKN2 BUB1B IRS2 CLDN1 IPO7 BAIAP2L2 CCND3 CCND1 CHEK2 ARHGDIB KNTC1 GTSE1 MAP3K4 TIPIN KCNH5 UNC5A DAPK1 PRKCB NPY1R HASPIN POU3F1 POU3F2 CACNB2 TIAM1 DEPDC1B UTS2 PKP1 PRKD1 CARD11 BLM PDE1B HTRA3 PDE1A ARHGAP19 SLC1A3 ADRB1 PIK3R1 PHB KALRN TRHDE RHOBTB2 CACNA1I C5 BRIP1 CCNB1 ARHGAP20 RACGAP1 GRK5 INPP5D G3BP2 KCNN1 NAALAD2 CLSPN ASIC2 MAP2K6 TRAP1 CDT1 EGR2 SNAPIN H…	0	0	UP in siEF&EEF	44092	negative regulation of molecular function	0.0022643	61	1778	0.034	CDKN1C ERRFI1 PKD2 HERPUD1 SPRED3 SPRED1 CASP3 NCS1 PALM ADORA1 PIM1 LEPR PDK1 APC2 CTNNBIP1 PRKCD PRKCA GMIP DUSP8 SSTR2 COMMD7 MAPK8IP1 SIGIRR DDIT3 CAT NEIL1 TRIB2 OPRD1 CSTB PXK FICD IFI6 GNAI1 ADCY6 GNAI2 CST3 IRAK2 SH3BP5 HMOX1 S1PR3 APOE CDKN2D TCF7L2 NQO1 JUN TGFB2 GADD45B HSPA5 GADD45A PBX1 SMAD7 CYLD GNAQ ID1 PDCD4 ID3 SPRY2 CALM3 SPRY1 NF2 CALM2	0	0
UP in EWS	71310	cellular response to organic substance	0.011551	15	437	0.034	PPP1R15A OPRD1 COLEC12 FOXC2 DUSP1 PDGFB FOS VLDLR HDAC9 KLF2 HERPUD1 COL1A1 DDIT3 CDH13 TRIB3	0	0	UP in siEF	51781	positive regulation of cell division	0.0037491	11	1392	0.007	TGFB2 MDK PDGFC PDGFB PDGFA VEGFC PTN FGF1 SCG2 PGF EREG	0	0	DN in EWS								0	0	DN in siEF	51253	negative regulation of RNA metabolic process	0.014813	35	873	0.04	RB1 DNMT1 SUV39H1 TTF2 HMGB1 SOX2 PURB SALL1 CUX2 E2F1 MLX EPC1 TAF9B TP63 PRMT6 SUZ12 FOXD3 HELLS RBM15 ZBTB16 CAV1 USP2 EAF2 NR0B1 PA2G4 PAX5 VAX1 POU4F2 RBL1 WT1 ID2 PAX9 TIMELESS ZMYND11 HOXD8	0	0	UP in siEF&EEF	7417	central nervous system development	0.0022676	70	1778	0.039	ROBO2 ARF4 OXTR LDB1 RORA JRKL CELSR1 PTPRG GLI2 NRCAM SOX8 SOX9 JARID2 SOX6 ANXA3 SPHK1 UNC5C PRKCA MAPK8IP3 TGFBR2 RCN1 BTD ZEB1 PITPNM1 TEP1 ROR1 ULK1 HOXB2 ROR2 ATP6V0D1 HOXB8 DLX1 NOTCH3 DLX2 NUMBL FOXC1 EFNA5 PCDH18 NPAS2 RTN4 CLN5 PCSK1N PDGFC FYN MSX1 CKB NPTX1 PLXNA3 BBS2 GSN EIF2B2 EYA1 HSPA5 CTNS SYNJ2 REC8 DCLK1 NR4A2 RCAN1 RIT1 SBK1 RNF103 GNAQ DLC1 ID3 PTX3 MDGA1 NES HCN2 FGFR1	0	0
UP in EWS	55074	calcium ion homeostasis	0.01195	13	437	0.029	CALCB ITPR1 ADM CACNA1C HERPUD1 JPH2 IL1B KDR F2RL1 CD24 TAC1 DRD4 CD55	0	0	UP in siEF	1932	regulation of protein amino acid phosphorylation	0.0037491	33	1392	0.023	ERRFI1 CD81 PDGFB PDGFA FGF1 SOCS3 EDNRA SOCS1 TNFRSF14 CCN2 MAP3K6 IL6R PDGFRB IL11 JUN SMAD3 RBPMS SPHK1 IGFBP3 PRKCD LIF VEGFC MAPK15 TGFBR1 MAPK8IP1 SMAD7 PRKAR1B CLCF1 CNKSR3 PDCD4 ERCC6 SCG2 CD44	0	0	DN in EWS								0	0	DN in siEF	16301	kinase activity	0.014983	56	873	0.064	RET DGKG ALK BUB1B PIK3CG KHK CCND1 CHEK2 PBK RIOK1 TK1 MAP3K4 EPHA5 EPHA7 KCNH5 SYK CHUK DAPK1 PRKCB RIPK4 CAD VRK1 HASPIN PASK PHKA2 CIT UHMK1 RP1 MELK PRKD1 DGKK CARD11 CAMK1G PRPS2 IPPK PRKDC PKMYT1 KALRN AK7 AURKB AURKA CCNB1 GRK5 ERBB4 HMGXB3 BUB1 MAP2K6 PLK4 PLK1 CCK MTOR TEC DLG2 CDK4 FGFR4 PFKM	0	0	UP in siEF&EEF	43167	ion binding	0.002491	446	1778	0.25	ZNF296 TES ADARB1 ALKBH7 ZFYVE1 ENO3 ZMIZ1 CYP1B1 JUNB RNF111 ZNF287 MBNL2 UNC13A ZNF160 PRKCD HPCAL1 PRKCA MYL5 MYL6 TEP1 ETHE1 FREM2 RNF122 CFD ZBTB8A MTMR3 AGAP2 ADAMTS10 ADAMTS15 RNF215 RNF217 S100A13 HMOX1 CHST14 GTF2IRD2B S100A11 S100A10 DMPK FUCA2 EDEM2 AIF1L EHD1 EHD2 CYLD MEX3B EHD3 RNF103 SNAI1 SNAI2 FAT3 DCHS1 RARG ZNF251 ZNF490 TGFB1I1 HEXA ASGR1 FARS2 GLI2 TRIM8 ING4 CSRP2 EFCAB2 TIM…	0	0
UP in EWS	7568	aging	0.012058	11	437	0.025	CDS1 JUN VCAM1 DDIT3 IL1B SERPINE1 ADM FOS CCN2 DCN LOXL2	0	0	UP in siEF	31252	cell leading edge	0.0037804	27	1392	0.019	OPRD1 ITGB5 LPL NEDD9 PLD1 CYTH3 CDH2 PODXL MYO6 ADORA1 PDLIM7 S100A11 GSN TNFRSF12A TPM1 PARVA AIF1L CDK6 JMY S100A6 ARHGEF4 CSPG4 SPRY1 VIM AJUBA BCAR1 GAS7	0	0	DN in EWS								0	0	DN in siEF	82	G1/S transition of mitotic cell cycle	0.015007	9	873	0.01	RB1 DBF4 CCND1 CDK4 CDCA5 RCC1 POLE CDC25A CDKN3	0	0	UP in siEF&EEF	61138	morphogenesis of a branching epithelium	0.002498	23	1778	0.012	ACVR1 NRP1 LAMA5 NOTCH3 EYA1 CSF1 SEMA3C SEMA3A CTSZ SIX1 ADM PBX1 PGF VEGFA GLI2 TGFBR2 EDNRA RDH10 PLXNA1 SOX9 NKX3-1 TGM2 FGFR1	0	0
UP in EWS	9790	embryonic development	0.012607	28	437	0.064	FOXC2 EPAS1 PDGFA ADM BCL10 SOBP AMOT SOX8 MSX1 CCN1 NKX3-1 PDGFRA TGFB2 VCAM1 FZD6 LIF VEGFC LSR KLF4 DKK1 COL1A1 GREM1 BST1 HOXB9 DDIT3 MAFF CYP1A1 TPP1	0	0	UP in siEF	19898	extrinsic to membrane	0.0038002	18	1392	0.012	APC2 MYLIP ERRFI1 PRNP CUBN JUP SERPINE2 PLAUR GNAI1 BST1 CYLD CDH2 EPB41L1 GNG4 S100A6 APOE MFGE8 RGS9	0	0	DN in EWS								0	0	DN in siEF	9628	response to abiotic stimulus	0.015312	35	873	0.04	BLM CPB2 FEN1 PRKDC PDE1B SLC1A3 ADRB1 BRCA1 BRCA2 SOX2 CCNB1 GNGT2 CCND1 NETO1 POLD1 P2RY1 USP1 RAD54L NOS1 NGFR TIPIN XRCC2 CAV1 PLA2G4A FANCB KMO SMC1A FANCG TICRR RP1 ADRB3 FANCD2 TFEC TIMELESS DTL	0	0	UP in siEF&EEF	5575	cellular_component	0.0028318	1675	1778	0.942	ALKBH7 F11R COMTD1 DPYSL4 MLYCD GSTK1 CXADR UNC5B UNC5C FRS3 SIGIRR ASPHD1 DDIT3 DDIT4 ORAI2 TXNIP ASPHD2 OPTN ATF3 SKAP2 EXD2 NLRX1 COL13A1 CRABP2 TPRG1L PDGFA PLA2G6 ADAMTS10 ADAMTS15 RNF215 EPB41L1 RDH10 RNF217 PDGFC GTF2IRD2B JUN JUP FUCA1 FUCA2 FN1 EIF2AK3 PBX3 BTBD11 PBX4 L1CAM LARP6 PBX1 AIF1L PPFIBP1 AGO4 SFXN3 HYOU1 FAT3 FXYD5 ACHE ZNF490 JRKL SHB BBC3 PANX2 NEFL TSPO NEFM DLGAP4 PCMTD1 …	0	0
UP in EWS	50778	positive regulation of immune response	0.012669	11	437	0.025	TGFB2 IRAK2 IL1B FHL1 SERPING1 FYN BCL10 TLR3 CD55 TNFSF13B TLR2	0	0	UP in siEF	10975	regulation of neuron projection development	0.0039338	20	1392	0.014	APC2 RTN4R NRP1 TNFRSF12A METRN BRI3 SPHK1 SEMA3A ISLR2 SEMA3F NGF PTPRG EFNA1 CDH2 SPP1 PLXNB1 ULK1 APOE LZTS1 PLXNA3	0	0	DN in EWS								0	0	DN in siEF	6364	rRNA processing	0.015441	13	873	0.014	NOP56 DIMT1 SUV39H1 HEATR1 DDX21 PA2G4 NOL6 EMG1 DKC1 EXOSC9 GEMIN4 NAF1 UTP20	0	0	UP in siEF&EEF	8360	regulation of cell shape	0.0028653	16	1778	0.008	FBLIM1 FN1 SHROOM3 CORO1A VEGFA CDC42EP4 DLC1 PDPN CDC42EP3 PALM ITGA7 MYH9 CDC42EP1 FYN RHOQ GAS7	0	0
UP in EWS	31349	positive regulation of defense response	0.012669	8	437	0.018	IRAK2 IL1B SERPINE1 BCL10 PTGS2 TAC1 TLR3 TLR2	0	0	UP in siEF	1936	regulation of endothelial cell proliferation	0.0041192	12	1392	0.008	POLD4 PDGFB KDR VASH2 CDH13 CCL2 APOE VASH1 THBS1 F3 SCG2 PGF	0	0	DN in EWS								0	0	DN in siEF	930	gamma-tubulin complex	0.016015	4	873	0.004	CENPJ TUBGCP4 BRCA1 MZT1	0	0	UP in siEF&EEF	9892	negative regulation of metabolic process	0.0028761	120	1778	0.067	ERRFI1 SLC27A1 SERPINE2 PLAT COMT EDNRA PALM ADORA1 CIR1 SOX8 SOX9 SOX6 IL6R TSPYL2 BNIP3L MEF2C TLE1 IGFBP5 CTNNBIP1 PRKCD ARID5A RFX3 ARID5B PRKCA GEM SIGIRR TEP1 RBP1 HOXB4 TXNIP TRIB2 DLX1 DLX2 PDGFA TWIST1 TXN FOXO3 GLIS2 ATXN1 NACC2 APOE ZNF423 S100A11 CD276 WWTR1 JUN SMAD3 SMURF2 EIF2AK3 GRIN2C SMAD7 DRAP1 AGO4 GIPC1 BHLHE40 BCL3 ID1 SNAI2 ID3 TPP1 NF2 RCOR2 MXD4 BCL2L1 CDKN1C HRK KDM5B PT…	0	0
UP in EWS	4222	metalloendopeptidase activity	0.012669	9	437	0.02	ADAM19 ADAMTS3 MMP15 MMP3 MMP19 ADAMTS9 MMP10 THSD4 CLGN	0	0	UP in siEF	10942	positive regulation of cell death	0.0042284	57	1392	0.04	HRK NRP1 COL18A1 ETS1 LYST BBC3 ING4 MCF2L ADORA1 CCN2 PHLDA1 SOX4 BOK TGM2 PLEKHG5 ARHGEF17 IGFBP3 MST1 NGF DUSP6 TGFBR1 GAL DDIT3 ARHGEF3 TXNIP ARHGEF4 TNFRSF25 NUPR1 SCG2 CD44 BCL10 PTGS2 FOXO3 THBS1 BCL2L11 APH1B TP53INP1 PSAP HMOX1 APOE NQO1 JUN TGFB2 SMAD3 CD70 BAD MX1 RAB27A FOSL1 TP53I3 STK17B BCL3 JMY ID3 ERCC6 CD24 ITM2B	0	0	DN in EWS								0	0	DN in siEF	4983	neuropeptide Y receptor activity	0.016015	4	873	0.004	PROKR1 NPY5R NPY1R QRFPR	0	0	UP in siEF&EEF	42802	identical protein binding	0.0028761	99	1778	0.055	SLC27A1 CSF1 MPG TNC ABAT ENO3 GJA3 OSTF1 IL6R MAP3K5 PHLDA3 SH3GLB1 EPM2A ACVR1 GSTK1 BNIP3L CPT1A APLP2 ADAM10 TAP1 ACTN4 MID1 PGF KCTD17 ATF3 ABCG1 PFKFB3 STXBP1 TPRG1L PDGFA CORO1A ATXN1 IRAK2 PDGFC S100A13 HMOX1 APOE RAB11FIP4 S100A11 WWTR1 PRNP TGFB2 SMAD3 JUP SMURF2 EIF2AK3 L1CAM MAFA COL1A1 TP53I3 GIPC1 MAP3K10 CRYL1 FGFR3 BCL2L1 ITGB1 ROBO2 ACHE NRP1 PYGB B4GALT1 LDB1 TRADD HSPB8 CBY1 FH…	0	0
UP in EWS	5625	soluble fraction	0.012947	18	437	0.041	DUSP4 MANBA CALCB DUSP1 PDE4D SERPINE1 ADM NTS FBLN5 TNFSF13B RHOB PPP1R3C PDE4B TPP1 PKIG IL13RA2 CCN1 CD55	0	0	UP in siEF	43123	positive regulation of I-kappaB kinase/NF-kappaB cascade	0.0043881	21	1392	0.015	GOLT1B SLC44A2 NEK6 PLK2 PLEKHG5 F2R MIB2 SECTM1 BCL10 CXXC5 RHOC LITAF BST2 PINK1 C18ORF32 S100A13 HMOX1 S100A4 MAP3K14 BIRC2 TGM2	0	0	DN in EWS								0	0	DN in siEF	6301	postreplication repair	0.016015	4	873	0.004	PCNA UBE2N BRCA1 DTL	0	0	UP in siEF&EEF	7389	pattern specification process	0.0029178	47	1778	0.026	DLX1 NRP1 NOTCH3 DLX2 RARG FOXC1 BMPR2 LDB1 SEMA3C SATB2 TSHZ1 SIX1 RFNG PKD2 GLI2 EDNRA KIF3B NKX3-2 WNT3 NKX3-1 ACVR1 TCF7L1 SMAD3 EYA1 CTNNBIP1 PBX3 SHROOM3 RFX3 MID1 PBX1 TGFBR1 VEGFA HIPK2 TGFBR2 BTD ZEB1 HOXB9 ASPH HOXB4 HOXB3 TPP1 HOXB2 ROR2 HOXB8 HOXB7 HOXB6 HOXB5	0	0
UP in EWS	10811	positive regulation of cell-substrate adhesion	0.012979	5	437	0.011	SDC4 KDR CDH13 CCN1 THBS1	0	0	UP in siEF	48562	embryonic organ morphogenesis	0.0043984	24	1392	0.017	TBX1 TCF7L2 FOXC2 DLX2 SMAD3 EYA1 PRRX1 TSHZ1 FZD6 SIX1 SOBP TGFBR1 TGFBR2 EFNA1 ZEB1 COL2A1 CHST11 RDH10 MYO6 SPRY2 ROR2 HOXB8 SCG2 NKX3-2	0	0	DN in EWS								0	0	DN in siEF	51252	regulation of RNA metabolic process	0.016911	120	873	0.137	RB1 RAX TTF2 IKZF2 SOX2 HMGN5 SALL1 SOX1 SALL2 MYB EPC1 ARID2 TP63 ZNF560 KCNH5 PRKCB USP2 RFX2 POU3F1 PASK ISL1 POU3F2 WDR77 ZNF718 TIMELESS KMT2D ZNF792 DNMT1 SRCAP DLX5 PRKDC ARX BRIP1 CCNB1 HLTF ALX4 OTX2 NKX6-1 PPARGC1B ZNF300 NKX2-2 ESRRA EGR2 BCL11B ZBTB16 CAV1 EAF2 NFATC3 NR0B1 IGF1 PA2G4 FANCB FLI1 LIN28B NR4A3 ID2 REL HOXD4 HOXD3 HOXD8 ZNF135 EZH2 TP73 BARHL2 CSRNP3 SUV39H1 BRCA1 HMGB1 …	0	0	UP in siEF&EEF	5576	extracellular region	0.0029178	251	1778	0.141	SPARC SERPINE2 SPATA20 ALKBH7 ANTXR2 CYB5D2 LGALS3 DHRS4L2 CCN1 IL15RA CXADR SERPINF1 ENTPD6 HLA-C HSD11B1L P3H1 HSPG2 BTD CCDC80 NBL1 FREM2 STX1A EPHA3 CFD PTGFR COL13A1 PDGFA TXN ADAMTS10 ADAMTS15 STC2 PDGFC ARSK ST3GAL4 S100A13 HMOX1 APOE ST3GAL1 FUCA2 EDEM2 FN1 LIF VASN MANF COL1A1 GNPTG CALM3 COL9A3 COL9A2 CALM2 DDR1 ACHE NRP1 COL18A1 NRP2 CCDC126 CTSZ AKR1B1 ADM VLDLR PCSK6 PRSS23 PTPRG CTS…	0	0
UP in EWS	48146	positive regulation of fibroblast proliferation	0.012979	5	437	0.011	PDGFRA PDGFB PDGFA CCN1 FOSL2	0	0	UP in siEF	19955	cytokine binding	0.0043984	20	1392	0.014	IL15RA IL4R IL11RA TNFRSF18 EBI3 LTBP4 THBS1 TGFBR1 IL27RA TGFBR2 TGFBR3 LEPR TNFRSF14 TNFRSF25 IL7R IL13RA2 A2M IL6R CMKLR1 IL13RA1	0	0	DN in EWS								0	0	DN in siEF	90068	positive regulation of cell cycle process	0.017188	8	873	0.009	PLK4 CENPE ESPL1 EGF BIRC5 IGF1 GTSE1 DLGAP5	0	0	UP in siEF&EEF	5319	lipid transporter activity	0.0029269	17	1778	0.009	ABCA1 SLC27A1 LRP1 ATP8B2 ATP10D PCTP ATP11A PITPNC1 FABP3 PITPNM1 GM2A PITPNM3 PSAP APOE ABCD1 ATP9A ABCG1	0	0
UP in EWS	10171	body morphogenesis	0.013136	4	437	0.009	COL1A1 CSRNP1 PDGFRA DKK1	0	0	UP in siEF	42493	response to drug	0.0043984	37	1392	0.026	BCAR3 COL18A1 PCSK1 OXTR SLC22A5 SEMA3C MVP PDGFB PDGFA LPL PTGS2 THBS1 AQP1 SOCS3 SOCS1 SLC22A18 ERBB2 CCL2 VAT1 JUN GPX3 ABCA3 IGFBP2 VEGFC NGF DUSP6 PGF ASS1 TGFBR2 FOSL1 FABP3 GAL LOX DDIT3 PDE3A TXNIP NES	0	0	DN in EWS								0	0	DN in siEF	16886	ligase activity, forming phosphoric ester bonds	0.017933	3	873	0.003	RCL1 LIG1 LIG3	0	0	UP in siEF&EEF	30036	actin cytoskeleton organization	0.0029697	42	1778	0.023	TNXB CORO1A RND3 TRIOBP HSP90B1 CNN3 AMOT CDC42 CNN2 EPS8 CYTH2 NUAK2 CAPZB EPB41L1 CALD1 TMSB4X NPHP1 NCK2 FLNB TMSB10 PDLIM7 PDK1 GSN ARHGEF17 TPM1 SHROOM3 DSTN PARVA ACTN4 FHDC1 EHD2 FMNL2 DAAM1 DAAM2 DLC1 JMY MYH9 NF2 OBSL1 BCAR1 RHOQ GAS7	0	0
UP in EWS	2698	negative regulation of immune effector process	0.013136	4	437	0.009	SERPING1 IL20RB HMOX1 A2M	0	0	UP in siEF	44057	regulation of system process	0.0044952	43	1392	0.03	OPRD1 OXTR SLC22A5 FLT1 SDC4 EPAS1 SEMA3A TNC ECE1 PLAT ADM PTGS2 AQP1 CNN1 CDH2 MYO6 ADORA1 HMOX1 KCNMB4 CCL2 APOE CCN2 CCN1 TAC1 LMCD1 LZTS1 TGFB2 LMO4 SPHK1 GAA TPM1 F2R EIF2AK3 SSTR2 NGF SMAD7 PINK1 VGF ADORA2B GIPC1 BHLHE40 MYL9 HBEGF	0	0	DN in EWS								0	0	DN in siEF	50998	nitric-oxide synthase binding	0.017933	3	873	0.003	ARG2 CAV1 NOS1AP	0	0	UP in siEF&EEF	90066	regulation of anatomical structure size	0.0029725	53	1778	0.029	NRP1 RARG BTG1 BMPR2 AVIL FHL1 TRIOBP AMOT CXCL16 TRO EDNRA CAPZB TMSB4X NCK2 NEFL NEFM TMSB10 APC2 TSPYL2 ATP6V0E1 TNFRSF12A SPHK1 ITGA1 ADAM10 TGFBR1 ACTA2 TGFBR3 ADAM17 RRAGC ADORA2B ULK1 HBEGF FOXC1 NDRG4 SEMA3A CAPG SEMA3F CORO1A RTN4 DNAJB2 GNG4 APOE PLXNA3 CDKN2D TGFB2 MAP3K1 GSN SMAD3 LAMB2 DCLK1 DCBLD2 FGFR3 FGFR1	0	0
UP in EWS	43687	post-translational protein modification	0.013213	49	437	0.112	BTG1 FLT1 PIK3CD PTPN21 TNFAIP3 PTPDC1 TGM1 KDR CCN1 DUSP4 DUSP5 EPHA4 PDGFRA DUSP2 DUSP1 ITGA1 UBE2QL1 DUSP8 DCN RNF144B IL1B CRY1 TRIB3 ALPK2 MET TLR3 TLR2 CDS1 CSTA UBA7 HDAC9 THBS1 NUAK2 IRAK2 ABL2 FYN S1PR2 DRD4 TGFB2 GADD45B RIOK3 GAD1 DCLK2 PDP1 MAPK10 BST1 SNRK PTPN6 NEK11	0	0	UP in siEF	10605	negative regulation of macromolecule metabolic process	0.0044963	91	1392	0.065	HRK KDM5B ERRFI1 PTPRU LDB1 SERPINE2 PTPRO SERPINE1 CBY1 PLAT HR ING4 HEY1 TRPS1 ITGAV SOX8 SOX9 IL6R LMCD1 APC2 KLF11 MEF2C IGFBP5 IGFBP3 PRKCD ARID5A ARID5B COMMD7 GEM RUNX2 EREG DKK3 SIGIRR ZEB1 ADORA2B CNKSR3 RBP1 IRF7 TXNIP SERPING1 PPARA CRYAB TRIB2 SCG2 JDP2 HBEGF DLX2 SP100 LRP1 GLIS3 PBXIP1 FOXO3 THBS1 GLIS1 GLIS2 DNAJB2 CST3 SOCS1 ATXN1 DNAJB5 HSF4 IGF2BP2 ZNF423 A2M S100A11 TCF7L2 JUN …	0	0	DN in EWS								0	0	DN in siEF	60236	regulation of mitotic spindle organization	0.017933	3	873	0.003	TPX2 CCNB1 BORA	0	0	UP in siEF&EEF	43169	cation binding	0.0029788	444	1778	0.249	ZNF296 TES ADARB1 ALKBH7 ZFYVE1 ENO3 ZMIZ1 CYP1B1 JUNB RNF111 ZNF287 MBNL2 UNC13A ZNF160 PRKCD HPCAL1 PRKCA MYL5 MYL6 TEP1 ETHE1 FREM2 RNF122 CFD ZBTB8A MTMR3 AGAP2 ADAMTS10 ADAMTS15 RNF215 RNF217 S100A13 HMOX1 GTF2IRD2B S100A11 S100A10 DMPK FUCA2 EDEM2 AIF1L EHD1 EHD2 CYLD MEX3B EHD3 RNF103 SNAI1 SNAI2 FAT3 DCHS1 RARG ZNF251 ZNF490 TGFB1I1 HEXA ASGR1 FARS2 GLI2 TRIM8 ING4 CSRP2 EFCAB2 TIMP2 TIMP…	0	0
UP in EWS	42542	response to hydrogen peroxide	0.013213	7	437	0.016	COL1A1 JUN DUSP1 DDIT3 TXNIP HMOX1 KLF2	0	0	UP in siEF	9893	positive regulation of metabolic process	0.0045651	111	1392	0.079	CSF1 MAML2 CD81 CBLB RORA AHR FGF1 ETS1 ICAM1 EDNRA CREB3L2 ADORA1 SOX8 CCN2 SOX9 CCN1 IL6R SOX4 MYLIP PDGFRA MEF2C F2R EBF1 DYRK1B BHLHA15 EREG HOXB9 DDIT3 ROR2 TRIB2 SCG2 ABCG1 NOTCH3 DLX2 EPAS1 EBI3 PDGFB GLIS3 PDGFA BCL10 FOXO3 NPAS2 GLIS1 FOXO1 GLIS2 SEC14L2 HRH1 ATXN1 PDGFC MYO6 HMOX1 TNFRSF14 CYTL1 APOE ZNF423 ABCA1 TFAP2B JUN TGFB2 SMAD3 RBPMS HSPA5 WFS1 LIF NFATC2 MAFA SMAD7 FOSL1 NR4A2 …	0	0	DN in EWS								0	0	DN in siEF	5658	alpha DNA polymerase:primase complex	0.017933	3	873	0.003	POLA1 PRIM1 MCM3	0	0	UP in siEF&EEF	51960	regulation of nervous system development	0.0030489	41	1778	0.023	RTN4R ROBO2 DLX1 NRP1 NOTCH3 DLX2 NUMBL OXTR SERPINE2 BRI3 SEMA3A SIX1 SEMA3F RTN4 PTPRG GLI2 CDH2 NCS1 TIMP2 NEFL NEFM NRCAM APOE PLXNA3 APC2 EYA1 TNFRSF12A DYNLT1 METRN SPHK1 SERPINF1 EIF2AK3 VEGFC PRKCA PBX1 EFNA1 TEP1 PLXNB2 PLXNB1 ULK1 AGRN	0	0
UP in EWS	45941	positive regulation of transcription	0.013274	27	437	0.061	CSRNP1 FOXC2 MAML2 EPAS1 CITED4 GLIS3 BCL10 FOXO3 ETS1 ARNTL SOX8 MSX1 CCN1 JUN MPP4 LIF FOS NR4A2 HOXB9 KLF5 DDIT3 IL1B IRF1 BCL3 TLR3 TLR2 CREB5	0	0	UP in siEF	43065	positive regulation of apoptosis	0.004902	56	1392	0.04	HRK NRP1 COL18A1 ETS1 LYST BBC3 ING4 MCF2L ADORA1 PHLDA1 SOX4 BOK TGM2 PLEKHG5 ARHGEF17 IGFBP3 MST1 NGF DUSP6 TGFBR1 GAL DDIT3 ARHGEF3 TXNIP ARHGEF4 TNFRSF25 NUPR1 SCG2 CD44 BCL10 PTGS2 FOXO3 THBS1 BCL2L11 APH1B TP53INP1 PSAP HMOX1 APOE NQO1 JUN TGFB2 SMAD3 CD70 BAD MX1 RAB27A FOSL1 TP53I3 STK17B BCL3 JMY ID3 ERCC6 CD24 ITM2B	0	0	DN in EWS								0	0	DN in siEF	31576	G2/M transition checkpoint	0.017933	6	873	0.006	BLM PLK1 BRCA1 CLSPN DTL TICRR	0	0	UP in siEF&EEF	50926	regulation of positive chemotaxis	0.0031331	9	1778	0.005	CREB3 SMAD3 CXCL8 ITGA2 VEGFC F2RL1 PRKCA F3 VEGFA	0	0
UP in EWS	7169	transmembrane receptor protein tyrosine kinase signaling pathway	0.013523	14	437	0.032	EPHA4 CSRNP1 FOXC2 PDGFRA FLT1 ANGPT2 PDGFB PDGFA NGF EPS8 KDR TXNIP CCN2 HBEGF	0	0	UP in siEF	10324	membrane invagination	0.0050013	33	1392	0.023	COLEC12 LMBR1L MEGF10 LRP1 THBS1 ASGR1 CXCL16 MRC2 MYO6 ADORA1 AP1S2 MICALL2 SH3BP4 ITGAV APOE PDLIM7 TGM2 ABCA1 CUBN ANXA3 DNM1 GULP1 EHD1 DNM3 EHD2 DAB2 RIN3 PTX3 ULK1 MFGE8 LRP10 RIN2 LRP12	0	0	DN in EWS								0	0	DN in siEF	10629	negative regulation of gene expression	0.017953	44	873	0.05	RB1 DNMT1 SUV39H1 RAX BRCA1 TTF2 HMGB1 PHB SOX2 PURB CCNB1 SALL1 CUX2 NACC1 E2F1 MLX EPC1 TAF9B TP63 FZD1 PRMT6 SUZ12 FOXD3 HELLS RBM15 ZBTB16 CAV1 USP2 EAF2 NR0B1 PA2G4 PAX5 VAX1 POU4F2 CENPF LIN28B RBL1 WT1 ID2 AGO2 PAX9 TIMELESS ZMYND11 HOXD8	0	0	UP in siEF&EEF	6979	response to oxidative stress	0.0032039	35	1778	0.019	BTG1 EPAS1 PTGS2 CLU PPP2CB PRDX5 GJA3 PIM1 HMOX1 STX3 APOE PRNP NQO1 JUN SCARA3 GPX3 SPHK1 TPM1 PRKCA F3 OXR1 ATOX1 KLF2 FOSL1 COL1A1 MMP14 DDIT3 PXDN CAT TXNIP SDC1 ERCC6 NEIL1 ND3 BCL2L1	0	0
UP in EWS	48585	negative regulation of response to stimulus	0.013776	10	437	0.022	GREM1 TGFB2 SOCS1 ANGPT2 IL1B SERPINE1 SERPING1 IL20RB TRIB1 A2M	0	0	UP in siEF	6897	endocytosis	0.0050013	33	1392	0.023	COLEC12 LMBR1L MEGF10 LRP1 THBS1 ASGR1 CXCL16 MRC2 MYO6 ADORA1 AP1S2 MICALL2 SH3BP4 ITGAV APOE PDLIM7 TGM2 ABCA1 CUBN ANXA3 DNM1 GULP1 EHD1 DNM3 EHD2 DAB2 RIN3 PTX3 ULK1 MFGE8 LRP10 RIN2 LRP12	0	0	DN in EWS								0	0	DN in siEF	51239	regulation of multicellular organismal process	0.017969	75	873	0.085	RB1 BARHL2 RYR2 CD83 POP1 BRCA2 GLI1 CDC20 SOX2 PNP CCND1 NETO1 C3AR1 ENPP1 NOS1 TP63 ARG2 RBM15 SYK NPY5R DCC NPY1R PLA2G4A ADRA2C POU3F2 WDR77 ASPM TIAM1 ARC FKBP4 CARD11 CPB2 HLF DLX5 PTGER3 SLC1A3 HOXD13 ADRB1 THY1 ATP1A1 NTN1 KALRN HSPD1 PURB C5 CCNB1 ERBB4 INPP5D P2RY1 IGF2BP1 NLRP2 NCAM2 LRRC4C MBNL3 NKX6-1 NKX2-2 FZD1 ESRRA NGFR GDF11 EGR2 GABBR1 EGF ZBTB16 XRCC2 CAV1 CCK IGF1 FANCB VAX1 …	0	0	UP in siEF&EEF	8284	positive regulation of cell proliferation	0.0032368	71	1778	0.039	NRP1 COL18A1 BMPR2 FLT1 B4GALT1 CSF1 CD81 ADM TCIRG1 LAMC1 CLU GLI2 ZMIZ1 NAMPT NCK2 SOX8 TIMP1 CCN1 IL6R SOX4 TGM2 IL13RA1 SPHK1 ITGA2 F2R VASH2 ADAM10 PRKCA GAB2 F3 PGF TGFBR1 TGFBR2 ADAM17 ADORA2B MFGE8 ATF3 PDGFA PTGS2 CORO1A TSPAN31 GNAI2 NACC2 PDGFC ERBB2 HSF4 HMOX1 S1PR3 S1PR2 CD276 WWTR1 JUN TGFB2 PRRX1 LAMB2 FZD7 LIF VEGFC LAMB1 PBX1 VEGFA FOSL2 HIPK2 FOSL1 KITLG CDK6 KLF5 CD24 FGFR3 BCL…	0	0
UP in EWS	33674	positive regulation of kinase activity	0.013912	15	437	0.034	CARD10 TGFB2 FLT1 SDC4 GADD45B DUSP1 ITGA1 PDGFB VLDLR THBS1 IL1B S1PR2 CD24 DRD4 TLR3	0	0	UP in siEF	7507	heart development	0.0050013	33	1392	0.023	NRP1 FOXC2 FOXC1 OXTR SEMA3C TNC CBY1 ECE1 PTPRJ ADM EDNRA ERBB2 SOX9 SOX4 NKX3-1 TBX1 TGFB2 CXADR SMAD3 ITGA4 LMO4 GAA TPM1 TGFBR1 SMAD7 TGFBR2 TGFBR3 COL3A1 COL2A1 COL5A1 ID3 OBSL1 FBN1	0	0	DN in EWS								0	0	DN in siEF	21987	cerebral cortex development	0.018335	7	873	0.008	SOX2 CNTNAP2 DAB1 ARX TACC3 LRP8 POU3F2	0	0	UP in siEF&EEF	8104	protein localization	0.003298	126	1778	0.07	RAB3B TRAF3IP2 GOLT1B CD81 CBLB SCAMP5 PALM AP1S2 HOMER3 CCN1 KIFAP3 TMSB10 F2R TAP1 ACTN4 ANK3 MAPK8IP3 PDIA4 RAB32 CACNB1 TOM1L2 RAB30 RAB31 RAB36 PARD3 TXNIP KDELR2 ULK1 TLN2 KDELR3 SQSTM1 OPTN STX1A VCL ABCG1 CFD RAB5B STXBP1 AGAP2 LIN7A LTBP3 HSP90B1 SYNGR1 SCFD2 MYO6 S100A13 SNX9 SNX7 SLC15A4 SEC31B RAB11FIP4 RAB11FIP5 BBS2 ABCA1 CTSA JUN TGFB2 RAB27A GRIN2C LRP1B REEP1 COL1A1 NBEA APPBP2 G…	0	0
UP in EWS	51251	positive regulation of lymphocyte activation	0.013912	9	437	0.02	VCAM1 IL1B EBI3 BCL10 PDCD1LG2 CD24 TAC1 IL13RA1 TNFSF13B	0	0	UP in siEF	48661	positive regulation of smooth muscle cell proliferation	0.0050013	9	1392	0.006	JUN FLT1 PDGFB HMOX1 CDH13 PTGS2 IL6R TGM2 EREG	0	0	DN in EWS								0	0	DN in siEF	44451	nucleoplasm part	0.018335	46	873	0.052	RB1 KMT2D BLM HLF MCM7 PRKDC FAAP24 TTF2 SOX2 XPO1 TGS1 CHEK2 NACC1 E2F1 TRIM69 E2F2 EPC1 ALX4 E2F3 OIP5 TAF9B PPARGC1B E2F7 E2F8 TOE1 SUZ12 FANCM ZBTB16 NFYC EAF2 NOC3L POU3F1 POU3F2 POU4F2 RBL1 WT1 DKC1 CDK4 PSME4 GEMIN4 GEMIN5 NAA15 TAF5 SMAP2 EZH2 MCM2	0	0	UP in siEF&EEF	43005	neuron projection	0.0032992	60	1778	0.033	ROBO2 NRP1 PYGB NRP2 CNTNAP1 DENND1A ALCAM KIF5C NCS1 KIF5A ADORA1 NEFL NEFM NRCAM CAST IFNGR1 ANXA3 SPHK1 ITGA2 ITGA1 TMOD2 CYBA MAPK8IP3 MAPK8IP1 TIAM2 DNM3 VGF SCN8A ULK1 ALDOC ATP6V0D1 STX1A OPRD1 LRP1 SEMA3A SDC3 CACNA1C GDPD5 RTN4 CAMK2N1 CALD1 MYO6 NCAM1 STX3 APOE PLK3 TGFB2 WFS1 KCNJ12 GAD1 BNIP3 SAMD4A RAB27A SYNJ2 KLHL24 L1CAM REC8 GIPC1 VIM HCN2	0	0
UP in EWS	2697	regulation of immune effector process	0.013912	9	437	0.02	IL1B SERPING1 IL20RB HMOX1 BCL10 A2M IL13RA1 ICAM1 TLR2	0	0	UP in siEF	51216	cartilage development	0.0050939	16	1392	0.011	DLX2 WNT5B PRRX1 COL11A2 EIF2AK3 COL1A1 ZEB1 COL2A1 BMP1 CHST11 MGP CREB3L2 CYTL1 ROR2 CCN2 SOX9	0	0	DN in EWS								0	0	DN in siEF	6355	regulation of transcription, DNA-dependent	0.018335	117	873	0.134	RB1 RAX TTF2 IKZF2 SOX2 HMGN5 SALL1 SOX1 SALL2 MYB EPC1 ARID2 TP63 ZNF560 KCNH5 PRKCB USP2 RFX2 POU3F1 PASK ISL1 POU3F2 WDR77 ZNF718 TIMELESS KMT2D ZNF792 DNMT1 SRCAP DLX5 PRKDC ARX BRIP1 HLTF ALX4 OTX2 NKX6-1 PPARGC1B ZNF300 NKX2-2 ESRRA EGR2 BCL11B ZBTB16 CAV1 EAF2 NFATC3 NR0B1 IGF1 PA2G4 FANCB FLI1 LIN28B NR4A3 ID2 REL HOXD4 HOXD3 HOXD8 ZNF135 EZH2 TP73 BARHL2 CSRNP3 SUV39H1 BRCA1 HMGB1 HOXC12…	0	0	UP in siEF&EEF	16044	cellular membrane organization	0.0033232	61	1778	0.034	LMBR1L SH3KBP1 DENND1A VLDLR ASGR1 CXCL16 MRC2 SERP1 FTH1 CASP3 HYAL3 ADORA1 AP1S2 ITGAV NRCAM TGM2 CHRNB1 ANXA3 DNM1 DNM3 BIN1 RIN3 ULK1 MFGE8 RIN2 COLEC12 LRP1 STXBP1 CORO1A CYTH2 LMNA MYO6 PSAP MICALL2 SH3BP4 STX3 APOE LDLR PDLIM7 ABCA1 BNIP3 NR1H3 MERTK SORL1 IGF2R SYT7 LRP1B GULP1 EHD1 REEP1 EHD2 COL5A1 LPCAT2 CD9 PTX3 AGRN LRP10 SEC24D CD24 LRP12 BCL2L1	0	0
UP in EWS	44093	positive regulation of molecular function	0.014202	29	437	0.066	FLT1 SDC4 CEBPG PDGFB BCL10 VLDLR THBS1 BBC3 ICAM1 APH1B IRAK2 ABL2 CCN2 S1PR2 DRD4 CARD10 TGFB2 GADD45B ANXA3 DUSP1 ITGA1 NR4A2 IL1B JMY TPP1 TRIB3 CD24 TLR3 TLR2	0	0	UP in siEF	1655	urogenital system development	0.0052919	24	1392	0.017	PDGFRB FOXC2 FOXC1 EYA1 TSHZ3 WFS1 TNC SIX1 ARID5B AHR NID1 ASS1 TGFBR1 MYO1E SGPL1 BCL2L11 RDH10 ID3 TPP1 SPRY1 SOX9 CD44 NKX3-1 FBN1	0	0	DN in EWS								0	0	DN in siEF	31325	positive regulation of cellular metabolic process	0.018434	69	873	0.079	RB1 BARHL2 CSRNP3 POP1 IRS2 BRCA1 TTF2 HMGB1 IKZF2 GLI1 CDC20 SOX2 CCND3 SALL1 CCND1 PSMD3 EPC1 FBXO5 TP63 FOXD3 POU1F1 RBM15 SYK UBE2E1 PLA2G4A POU3F2 KLF15 UHMK1 PAX9 DNA2 ANAPC1 CARD11 KMT2D BLM PSMD12 DNMT1 HLF PRKDC HOXD13 ADRB1 PSMC3IP CCNB1 E2F1 ALX4 E2F3 PPARGC1B NKX2-2 ESRRA EGR2 BCL11B EGF CAV1 NFYC PLK1 NFATC3 CCK IGF1 GDF6 POU4F2 MTOR RAD50 TEC NR4A3 WT1 UBE2S UBE2N REL NAA15 TP73	0	0	UP in siEF&EEF	45860	positive regulation of protein kinase activity	0.0034847	42	1778	0.023	FLT1 SDC4 CSF1 LRP1 CD81 DGKA VLDLR PPOX ADCY6 GNAI2 EDNRA PRKAR2B ERBB2 ADORA1 PIM1 S1PR2 MAP3K6 MAP3K5 PDK1 CARD10 TGFB2 MAP3K1 GADD45B HSPA5 SPHK1 STRADB ITGA1 F2R MAPK8IP3 TGFBR1 TGFBR2 EFNA1 ERN1 KITLG ADAM17 PRKAR1B ADORA2B PRKAR1A PARD3 MAP3K10 ERCC6 CD24	0	0
UP in EWS	2274	myeloid leukocyte activation	0.014759	6	437	0.013	CXCL8 ANXA3 CASP1 NDRG1 TLR3 TLR2	0	0	UP in siEF	51789	response to protein stimulus	0.0053596	21	1392	0.015	PPP1R15A PCSK1 HSPA5 SPHK1 EDEM2 EIF2AK3 VASH1 HERPUD1 DNAJC3 DNAJB2 NR4A2 ERP44 DNAJB5 DDIT3 CREB3L1 DNAJC4 CREB3L2 ID3 FBXO6 CCN1 CTSB	0	0	DN in EWS								0	0	DN in siEF	43565	sequence-specific DNA binding	0.018469	49	873	0.056	BARHL2 RAX TTF2 HOXC12 FOXM1 GLI1 SOX2 SOX1 TP63 FOXD3 POU1F1 POU3F1 ISL1 POU3F2 ETV4 PAX7 KIF2C MCM2 PIF1 KMT2D HLF DLX5 ARX HOXD13 HSPD1 PURB CUX2 TERT E2F1 ALX4 OTX2 NCAM2 NKX6-1 NKX2-2 ESRRA NFYC NR0B1 VAX1 POU4F1 FLI1 POU4F2 TEC NR4A3 WT1 HOXD4 TAF5 HOXD3 HOXD8 TP73	0	0	UP in siEF&EEF	30433	ER-associated protein catabolic process	0.0035145	10	1778	0.005	DNAJB2 ERLEC1 RNF103 OS9 HSPA5 AMFR TMEM67 SYVN1 SEC61B HSP90B1	0	0
UP in EWS	51591	response to cAMP	0.014759	6	437	0.013	COL1A1 JUN VGF DUSP1 MMP19 FOS	0	0	UP in siEF	70373	negative regulation of ERK1 and ERK2 cascade	0.0053897	5	1392	0.003	CNKSR3 LIF SPRY2 SPRY1 DUSP6	0	0	DN in EWS								0	0	DN in siEF	9893	positive regulation of metabolic process	0.018734	72	873	0.082	RB1 BARHL2 CSRNP3 POP1 IRS2 BRCA1 TTF2 HMGB1 IKZF2 GLI1 CDC20 SOX2 CCND3 SALL1 CCND1 PSMD3 EPC1 FBXO5 TP63 FOXD3 POU1F1 RBM15 SYK UBE2E1 PLA2G4A POU3F1 POU3F2 KLF15 UHMK1 PAX9 DNA2 DTL ANAPC1 CARD11 KMT2D BLM PSMD12 DNMT1 HLF PRKDC HOXD13 ADRB1 PSMC3IP CCNB1 E2F1 ALX4 E2F3 PPARGC1B NKX2-2 ESRRA EGR2 BCL11B EGF CAV1 NFYC PLK1 NFATC3 CCK IGF1 GDF6 POU4F2 MTOR RAD50 TEC NR4A3 WT1 UBE2S UBE2N REL NAA…	0	0	UP in siEF&EEF	61024	membrane organization	0.0035419	61	1778	0.034	LMBR1L SH3KBP1 DENND1A VLDLR ASGR1 CXCL16 MRC2 SERP1 FTH1 CASP3 HYAL3 ADORA1 AP1S2 ITGAV NRCAM TGM2 CHRNB1 ANXA3 DNM1 DNM3 BIN1 RIN3 ULK1 MFGE8 RIN2 COLEC12 LRP1 STXBP1 CORO1A CYTH2 LMNA MYO6 PSAP MICALL2 SH3BP4 STX3 APOE LDLR PDLIM7 ABCA1 BNIP3 NR1H3 MERTK SORL1 IGF2R SYT7 LRP1B GULP1 EHD1 REEP1 EHD2 COL5A1 LPCAT2 CD9 PTX3 AGRN LRP10 SEC24D CD24 LRP12 BCL2L1	0	0
[truncated: 349 more rows]
[truncated: 10 more columns]

## Sheet: GO association HEK
UP in siEWS HEK	GO ID	Description	p-adj	N	N total	% of total	Genes	0	0	DN in EWS HEK	GO ID	Description	p-adj	N	N total	% of total	Genes	0	0	HEK UP in pEWSFLI1	GO ID	Description	p-adj	N	N total	% of total	Genes	0	0	HEK DN in EWSFLI1	GO ID	Description	p-adj	N	N total	% of total	Genes		0	0
[truncated: 657 more rows]
